# Supplementary material for: Insights Into the Mechanisms of <em>Lactobacillus acidophilus</em> Activity Against <em>Entamoeba histolytica</em> by Using Thiol-Redox-Proteomics
Source: Preprints.org preprint supplement (doi:10.20944/preprints202203.0201.v1), 2022-03-15
Supplement: Supplementary file 1 [file supplementary]

## Sheet: Carbamidomethyl (C)Sites
Proteins	Positions within proteins	Leading proteins	Protein	Fasta headers	Localization prob	Score diff	PEP	Score	Delta score	Score for localization	Localization prob LA1+DTT	Score diff LA1+DTT	PEP LA1+DTT	Score LA1+DTT	Localization prob LA1-DTT	Score diff LA1-DTT	PEP LA1-DTT	Score LA1-DTT	Localization prob LA2+DTT	Score diff LA2+DTT	PEP LA2+DTT	Score LA2+DTT	Localization prob LA2-DTT	Score diff LA2-DTT	PEP LA2-DTT	Score LA2-DTT	Localization prob LA3+DTT	Score diff LA3+DTT	PEP LA3+DTT	Score LA3+DTT	Localization prob LA3-DTT	Score diff LA3-DTT	PEP LA3-DTT	Score LA3-DTT	Diagnostic peak	Number of Carbamidomethyl (C)	Amino acid	Sequence window	Modification window	Peptide window coverage	Carbamidomethyl (C) Probabilities	Carbamidomethyl (C) Score diffs	Position in peptide	Charge	Mass error [ppm]	Identification type LA1+DTT	Identification type LA1-DTT	Identification type LA2+DTT	Identification type LA2-DTT
A0A175JI75	41	A0A175JI75	A0A175JI75	>tr|A0A175JI75|A0A175JI75_ENTHI Ferredoxin, putative OS=Entamoeba histolytica OX=5759 GN=EHI_198670 PE=4 SV=1	1	27.9279	5.71946e-23	153.1	145.59	27.928	1	27.9279	5.71946e-23	153.1																						4	C	VLEVNDHVEIKNPDDCIGCGACVDACPQGVL	X;X;X;X;X;X;X;X;X;X;X;X;X;X;X;Carbamidomethyl (C);X;X;Carbamidomethyl (C);X;X;Carbamidomethyl (C);X;X;X;Carbamidomethyl (C);X;X;X;X;X	XXXXXXXXXXXPPPPPPPPPPPPPPPPPPPP	NPDDC(1)IGC(1)GAC(1)VDAC(1)PQGVLK	NPDDC(27.93)IGC(27.93)GAC(27.93)VDAC(27.93)PQGVLK	5	3	-0.71852	By MS/MS	By matching	By matching	By matching
A0A175JI75	44	A0A175JI75	A0A175JI75	>tr|A0A175JI75|A0A175JI75_ENTHI Ferredoxin, putative OS=Entamoeba histolytica OX=5759 GN=EHI_198670 PE=4 SV=1	1	27.9279	5.71946e-23	153.1	145.59	27.928	1	27.9279	5.71946e-23	153.1																						4	C	VNDHVEIKNPDDCIGCGACVDACPQGVLKVE	X;X;X;X;X;X;X;X;X;X;X;X;Carbamidomethyl (C);X;X;Carbamidomethyl (C);X;X;Carbamidomethyl (C);X;X;X;Carbamidomethyl (C);X;X;X;X;X;X;X;X	XXXXXXXXPPPPPPPPPPPPPPPPPPPPPXX	NPDDC(1)IGC(1)GAC(1)VDAC(1)PQGVLK	NPDDC(27.93)IGC(27.93)GAC(27.93)VDAC(27.93)PQGVLK	8	3	-0.71852	By MS/MS	By matching	By matching	By matching
A0A175JI75	47	A0A175JI75	A0A175JI75	>tr|A0A175JI75|A0A175JI75_ENTHI Ferredoxin, putative OS=Entamoeba histolytica OX=5759 GN=EHI_198670 PE=4 SV=1	1	27.9279	5.71946e-23	153.1	145.59	27.928	1	27.9279	5.71946e-23	153.1																						4	C	HVEIKNPDDCIGCGACVDACPQGVLKVE___	X;X;X;X;X;X;X;X;X;Carbamidomethyl (C);X;X;Carbamidomethyl (C);X;X;Carbamidomethyl (C);X;X;X;Carbamidomethyl (C);X;X;X;X;X;X;X;X;X;X;X	XXXXXPPPPPPPPPPPPPPPPPPPPPXXXXX	NPDDC(1)IGC(1)GAC(1)VDAC(1)PQGVLK	NPDDC(27.93)IGC(27.93)GAC(27.93)VDAC(27.93)PQGVLK	11	3	-0.71852	By MS/MS	By matching	By matching	By matching
A0A175JI75	51	A0A175JI75	A0A175JI75	>tr|A0A175JI75|A0A175JI75_ENTHI Ferredoxin, putative OS=Entamoeba histolytica OX=5759 GN=EHI_198670 PE=4 SV=1	1	27.9279	5.71946e-23	153.1	145.59	27.928	1	27.9279	5.71946e-23	153.1																						4	C	KNPDDCIGCGACVDACPQGVLKVE_______	X;X;X;X;X;Carbamidomethyl (C);X;X;Carbamidomethyl (C);X;X;Carbamidomethyl (C);X;X;X;Carbamidomethyl (C);X;X;X;X;X;X;X;X;X;X;X;X;X;X;X	XPPPPPPPPPPPPPPPPPPPPPXXXXXXXXX	NPDDC(1)IGC(1)GAC(1)VDAC(1)PQGVLK	NPDDC(27.93)IGC(27.93)GAC(27.93)VDAC(27.93)PQGVLK	15	3	-0.71852	By MS/MS	By matching	By matching	By matching
C4M9M7;A0A175JJM9	35;38	C4M9M7	C4M9M7	>tr|C4M9M7|C4M9M7_ENTHI 40S ribosomal protein S13, putative OS=Entamoeba histolytica OX=5759 GN=EHI_112880 PE=3 SV=1;>tr|A0A175JJM9|A0A175JJM9_ENTHI 40S ribosomal protein S13, putative OS=Entamoeba histolytica OX=5759 GN=EHI_035460 PE=3 SV=1	1	95.4173	1.28741e-07	129.34	116.31	95.417	1	94.4023	1.36148e-05	94.402	1	31.0712	0.021803	31.071	1	129.343	1.28741e-07	129.34	1	37.6134	0.0287699	37.613	1	95.4173	1.08398e-05	95.417	1	95.4173	1.08398e-05	95.417		1	C	PSWLKTSTLEVIDEMCKLAKKGIAPSQIGAI	X;X;X;X;X;X;X;X;X;X;X;X;X;X;Oxidation (M);Carbamidomethyl (C);X;X;X;X;X;X;X;X;X;X;X;X;X;X;X	XXXXXPPPPPPPPPPPPXXXXXXXXXXXXXX	TSTLEVIDEMC(1)K	TSTLEVIDEMC(95.42)K	11	2	-0.021872	By MS/MS	By MS/MS	By MS/MS	By MS/MS
A0A175JXH6;C4LSZ3	52;52	A0A175JXH6;C4LSZ3	C4LSZ3	>tr|A0A175JXH6|A0A175JXH6_ENTHI 60S ribosomal protein L37a, putative OS=Entamoeba histolytica OX=5759 GN=EHI_008650 PE=3 SV=1;>tr|C4LSZ3|C4LSZ3_ENTHI 60S ribosomal protein L37a, putative OS=Entamoeba histolytica OX=5759 GN=EHI_148230 PE=3 SV=1	0.9997	35.2341	0.019821	42.336	33.926	42.336																					0.9997	35.2341	0.019821	42.336		1	C	YICPFCCKEAVRRTACGIWECKGCGKQIAGG;YVCPFCCKEAVRRTACGIWECKGCKKQIAGG	X;X;Carbamidomethyl (C);X;X;Carbamidomethyl (C);Carbamidomethyl (C);X;X;X;X;X;X;X;X;Carbamidomethyl (C);X;X;X;X;NEM;X;X;X;X;X;X;X;X;X;X	XXXXXXXXXXXXXPPPPPPPPPXXXXXXXXX	TAC(1)GIWECK	TAC(35.23)GIWEC(-35.23)K	3	2	1.4939	By matching	By matching	By matching	By matching
A0A175JXH6	39	A0A175JXH6	A0A175JXH6	>tr|A0A175JXH6|A0A175JXH6_ENTHI 60S ribosomal protein L37a, putative OS=Entamoeba histolytica OX=5759 GN=EHI_008650 PE=3 SV=1	1	60.9719	0.00210919	62.659	53.264	60.972	0	0		NaN					1	60.9719	0.00231164	60.972	1	62.6585	0.00210919	62.659	0	0		NaN	1	55.9018	0.0029202	55.902		3	C	KVIKKIEIAQHSKYVCPFCCKEAVRRTACGI	X;X;X;X;X;X;X;X;X;X;Propionamide_aa;X;X;X;X;Carbamidomethyl (C);X;X;Carbamidomethyl (C);Carbamidomethyl (C);X;X;X;X;X;X;X;X;Carbamidomethyl (C);X;X	XXXXXXXXXXXXXPPPPPPPPXXXXXXXXXX	YVC(1)PFC(1)C(1)K	YVC(60.97)PFC(60.97)C(60.97)K	3	2	0.23252	By matching	By matching	By MS/MS	By MS/MS
A0A175JXH6	42	A0A175JXH6	A0A175JXH6	>tr|A0A175JXH6|A0A175JXH6_ENTHI 60S ribosomal protein L37a, putative OS=Entamoeba histolytica OX=5759 GN=EHI_008650 PE=3 SV=1	1	60.9719	0.00210919	62.659	53.264	60.972	0	0		NaN					1	60.9719	0.00231164	60.972	1	62.6585	0.00210919	62.659	0	0		NaN	1	55.9018	0.0029202	55.902		3	C	KKIEIAQHSKYVCPFCCKEAVRRTACGIWEC	X;X;X;X;X;X;X;Propionamide_aa;X;X;X;X;Carbamidomethyl (C);X;X;Carbamidomethyl (C);Carbamidomethyl (C);X;X;X;X;X;X;X;X;Carbamidomethyl (C);X;X;X;X;NEM	XXXXXXXXXXPPPPPPPPXXXXXXXXXXXXX	YVC(1)PFC(1)C(1)K	YVC(60.97)PFC(60.97)C(60.97)K	6	2	0.23252	By matching	By matching	By MS/MS	By MS/MS
A0A175JXH6	43	A0A175JXH6	A0A175JXH6	>tr|A0A175JXH6|A0A175JXH6_ENTHI 60S ribosomal protein L37a, putative OS=Entamoeba histolytica OX=5759 GN=EHI_008650 PE=3 SV=1	1	60.9719	0.00210919	62.659	53.264	60.972	0	0		NaN					1	60.9719	0.00231164	60.972	1	62.6585	0.00210919	62.659	0	0		NaN	1	55.9018	0.0029202	55.902		3	C	KIEIAQHSKYVCPFCCKEAVRRTACGIWECK	X;X;X;X;X;X;Propionamide_aa;X;X;X;X;Carbamidomethyl (C);X;X;Carbamidomethyl (C);Carbamidomethyl (C);X;X;X;X;X;X;X;X;Carbamidomethyl (C);X;X;X;X;NEM;X	XXXXXXXXXPPPPPPPPXXXXXXXXXXXXXX	YVC(1)PFC(1)C(1)K	YVC(60.97)PFC(60.97)C(60.97)K	7	2	0.23252	By matching	By matching	By MS/MS	By MS/MS
C4LSA2;B1N2E0;C4M7Y8	209;209;180	C4LSA2	C4LSA2	>tr|C4LSA2|C4LSA2_ENTHI Alpha-amylase, putative OS=Entamoeba histolytica OX=5759 GN=EHI_153100 PE=4 SV=1;>tr|B1N2E0|B1N2E0_ENTHI Beta/alpha-amylase, putative OS=Entamoeba histolytica OX=5759 GN=EHI_153590 PE=4 SV=1;>tr|C4M7Y8|C4M7Y8_ENTHI Alpha-amylase, pu	1	67.385	0.000339214	67.385	47.726	67.385	1	67.385	0.000339214	67.385					0	0		NaN														1	C	DRNYWKDIRETIESTCDNRKNQGKQWGTLGY	X;X;X;X;X;X;X;X;X;X;X;X;X;X;X;Carbamidomethyl (C);X;X;X;X;X;X;X;X;X;X;X;X;X;X;X	XXXXXXXXXPPPPPPPPPPPXXXXXXXXXXX	ETIESTC(1)DNRK	ETIESTC(67.38)DNRK	7	3	-0.42409	By MS/MS	By matching	By matching	By matching
C4LSA2;B1N2E0;C4M7Y8;B1N605	252;252;223;28	C4LSA2	C4LSA2	>tr|C4LSA2|C4LSA2_ENTHI Alpha-amylase, putative OS=Entamoeba histolytica OX=5759 GN=EHI_153100 PE=4 SV=1;>tr|B1N2E0|B1N2E0_ENTHI Beta/alpha-amylase, putative OS=Entamoeba histolytica OX=5759 GN=EHI_153590 PE=4 SV=1;>tr|C4M7Y8|C4M7Y8_ENTHI Alpha-amylase, pu	1	42.5986	0.0116353	43.448	30.621	42.599	1	43.4484	0.0116353	43.448					1	42.5986	0.0122238	42.599					0	0		NaN						1	C	NTWGYYASGGYGLRSCFHFPGRYNLVQTLAC	X;X;X;X;X;X;X;X;X;X;X;X;X;X;X;Carbamidomethyl (C);X;X;X;X;X;X;X;X;X;X;X;X;X;X;X	XXXXXXXXXXXXXXPPPPPPPPXXXXXXXXX	SC(1)FHFPGR	SC(42.6)FHFPGR	2	3	-1.0894	By MS/MS	By matching	By MS/MS	By matching
B1N2F9;C4M0C2	232;234	B1N2F9;C4M0C2	B1N2F9	>tr|B1N2F9|B1N2F9_ENTHI Type A flavoprotein, putative OS=Entamoeba histolytica OX=5759 GN=EHI_096710 PE=2 SV=1;>tr|C4M0C2|C4M0C2_ENTHI Type A flavoprotein, putative OS=Entamoeba histolytica OX=5759 GN=EHI_064530 PE=4 SV=1	1	63.3202	5.23577e-10	180.07	157.42	63.32	1	179.422	5.64638e-10	179.42	1	58.8894	0.000835735	58.889	1	180.066	5.23577e-10	180.07	1	58.7431	0.00084423	58.743	1	63.3202	1.55065e-05	150.1	1	72.2004	0.000196463	72.2		1;2	C	IETQMGFPSDELKAICCSHGPVLRTHIKENI;LENDIGFPVDELKAICCSHGPVLRTNIKENI	X;X;X;X;Oxidation (M);X;X;X;X;X;X;X;X;X;X;Carbamidomethyl (C);Carbamidomethyl (C);NEM H2O;X;X;X;X;X;X;X;X;X;X;NEM H2O;X;X;X	XXXXXXXXXXXXXPPPPPPPPPPPXXXXXXX	AIC(1)C(1)SHGPVLR	AIC(63.32)C(63.32)SHGPVLR	3	3	-0.68907	By MS/MS	By MS/MS	By MS/MS	By MS/MS
B1N2F9;C4M0C2	233;235	B1N2F9;C4M0C2	B1N2F9	>tr|B1N2F9|B1N2F9_ENTHI Type A flavoprotein, putative OS=Entamoeba histolytica OX=5759 GN=EHI_096710 PE=2 SV=1;>tr|C4M0C2|C4M0C2_ENTHI Type A flavoprotein, putative OS=Entamoeba histolytica OX=5759 GN=EHI_064530 PE=4 SV=1	1	63.3202	5.23577e-10	180.07	157.42	63.32	1	179.422	5.64638e-10	179.42	1	58.8894	0.000835735	58.889	1	180.066	5.23577e-10	180.07	1	58.7431	0.00084423	58.743	1	63.3202	1.55065e-05	150.1	1	72.2004	0.000196463	72.2		1;2	C	ENDIGFPVDELKAICCSHGPVLRTNIKENIE;ETQMGFPSDELKAICCSHGPVLRTHIKENIE	X;X;X;Oxidation (M);X;X;X;X;X;X;X;X;X;X;Carbamidomethyl (C);NEM;NEM H2O;Carbamidomethyl (C);X;X;X;X;X;X;X;X;X;X;NEM H2O;X;X;X;X	XXXXXXXXXXXXPPPPPPPPPPPXXXXXXXX	AIC(1)C(1)SHGPVLR	AIC(63.32)C(63.32)SHGPVLR	4	3	-0.68907	By MS/MS	By MS/MS	By MS/MS	By MS/MS
B1N2F9	60	B1N2F9	B1N2F9	>tr|B1N2F9|B1N2F9_ENTHI Type A flavoprotein, putative OS=Entamoeba histolytica OX=5759 GN=EHI_096710 PE=2 SV=1	1	183.102	3.53419e-65	248.35	230.45	183.1	1	186.616	1.9394e-37	186.62	0	0		NaN	1	183.102	3.53419e-65	248.35	1	55.3373	0.0003006	55.337	1	188.861	4.88141e-31	188.86	1	50.3582	0.000821469	50.358		1;2	C	GNVLFETCKENFAGECLERIEDVIGKEGKLD	X;X;X;X;X;X;X;Carbamidomethyl (C);NEM;X;X;X;X;X;X;X;Carbamidomethyl (C);X;X;X;X;X;X;X;X;X;X;X;X;X;X;X	PPPPPPPPPPPPPPPPPPPXXXXXXXXXXXX	SEKGNVLFETC(1)KENFAGEC(1)LER	SEKGNVLFETC(183.1)KENFAGEC(183.1)LER	19	3	-0.35614	By MS/MS	By matching	By MS/MS	By MS/MS
B1N2F9	393	B1N2F9	B1N2F9	>tr|B1N2F9|B1N2F9_ENTHI Type A flavoprotein, putative OS=Entamoeba histolytica OX=5759 GN=EHI_096710 PE=2 SV=1	1	50.1781	1.88943e-16	144.29	125.05	50.178	1	71.1426	3.24298e-15	135.72	0	0		NaN	1	61.649	2.60614e-10	122.96	1	42.3144	0.00350517	42.314	1	50.1781	1.88943e-16	144.29	1	62.0552	0.000304049	62.055		1	C	PLSIKFQPNSNELQTCFEWGKKFAEALKA__	X;X;X;X;X;X;X;X;X;X;X;X;X;X;X;Carbamidomethyl (C);X;X;X;X;X;X;X;X;X;X;X;X;X;X;X	XXXXXPPPPPPPPPPPPPPPPPXXXXXXXXX	FQPNSNELQTC(1)FEWGKK	FQPNSNELQTC(50.18)FEWGKK	11	3	-0.82415	By MS/MS	By matching	By MS/MS	By MS/MS
B1N2F9	349	B1N2F9	B1N2F9	>tr|B1N2F9|B1N2F9_ENTHI Type A flavoprotein, putative OS=Entamoeba histolytica OX=5759 GN=EHI_096710 PE=2 SV=1	1	59.7277	1.21901e-16	150.39	131.66	59.728	1	24.0531	1.21901e-16	150.39	0	0		NaN	1	91.3551	9.08756e-11	126.77	1	75.9106	1.51999e-15	140.22	1	59.7277	2.5772e-10	123.02	1	51.5913	0.00105356	51.591		1	C	ACSLNPTIHCNRFVQCFGSFGWSGEGVKNLS	X;Carbamidomethyl (C);NEM H2O;X;X;X;X;X;X;X;Carbamidomethyl (C);X;X;X;X;X;Carbamidomethyl (C);X;X;X;X;X;X;X;X;X;X;X;X;X;X;X	XXXXXXXXXXXXPPPPPPPPPPPPPPPPXXX	FVQC(1)FGSFGWSGEGVK	FVQC(59.73)FGSFGWSGEGVK	4	2	0.83268	By MS/MS	By matching	By MS/MS	By MS/MS
B1N2F9	335	B1N2F9	B1N2F9	>tr|B1N2F9|B1N2F9_ENTHI Type A flavoprotein, putative OS=Entamoeba histolytica OX=5759 GN=EHI_096710 PE=2 SV=1	1	68.3676	1.39984e-17	103.18	99.4	68.368	1	90.7097	1.39984e-17	103.18					1	68.3676	2.29472e-14	97.408					1	65.3779	1.73385e-07	65.378						2	C	PTLVNDTIPPIMQIACSLNPTIHCNRFVQCF	X;X;X;X;X;X;X;X;X;X;X;Oxidation (M);X;X;X;Carbamidomethyl (C);X;X;X;X;X;X;X;Carbamidomethyl (C);X;X;X;X;X;Carbamidomethyl (C);NEM;NEM H2O;X	PPPPPPPPPPPPPPPPPPPPPPPPPPXXXXX	GLLLGTPTLVNDTIPPIMQIAC(1)SLNPTIHC(1)NR	GLLLGTPTLVNDTIPPIMQIAC(68.37)SLNPTIHC(68.37)NR	22	3	-0.41608	By MS/MS	By matching	By MS/MS	By matching
B1N2F9	343	B1N2F9	B1N2F9	>tr|B1N2F9|B1N2F9_ENTHI Type A flavoprotein, putative OS=Entamoeba histolytica OX=5759 GN=EHI_096710 PE=2 SV=1	1	68.3676	1.39984e-17	103.18	99.4	68.368	1	90.7097	1.39984e-17	103.18					1	68.3676	2.29472e-14	97.408					1	65.3779	1.73385e-07	65.378						1;2	C	PPIMQIACSLNPTIHCNRFVQCFGSFGWSGE	X;X;X;Oxidation (M);X;X;X;Carbamidomethyl (C);NEM H2O;X;X;X;X;X;X;X;Carbamidomethyl (C);X;X;X;X;X;Carbamidomethyl (C);NEM;NEM H2O;X;X;X;X;X;X;X;X;X	PPPPPPPPPPPPPPPPPPXXXXXXXXXXXXX	GLLLGTPTLVNDTIPPIMQIAC(1)SLNPTIHC(1)NR	GLLLGTPTLVNDTIPPIMQIAC(68.37)SLNPTIHC(68.37)NR	30	3	-0.41608	By MS/MS	By matching	By MS/MS	By matching
B1N2F9	52	B1N2F9	B1N2F9	>tr|B1N2F9|B1N2F9_ENTHI Type A flavoprotein, putative OS=Entamoeba histolytica OX=5759 GN=EHI_096710 PE=2 SV=1	1	183.102	1.9394e-37	193.06	181.17	183.1	1	186.616	1.9394e-37	186.62					1	183.102	6.02352e-37	193.06	1	55.3373	0.0003006	55.337	1	188.861	4.88141e-31	188.86	1	50.3582	0.000821469	50.358		1;2	C	SFLLKSEKGNVLFETCKENFAGECLERIEDV	X;X;X;X;X;X;X;X;X;X;X;X;X;X;X;Carbamidomethyl (C);X;X;X;X;X;X;X;Carbamidomethyl (C);NEM;X;X;X;X;X;X;X	XXXXXPPPPPPPPPPPPPPPPPPPPPPXXXX	SEKGNVLFETC(1)KENFAGEC(1)LER	SEKGNVLFETC(183.1)KENFAGEC(183.1)LER	11	3	-0.35614	By MS/MS	By matching	By MS/MS	By MS/MS
B1N2F9	167	B1N2F9	B1N2F9	>tr|B1N2F9|B1N2F9_ENTHI Type A flavoprotein, putative OS=Entamoeba histolytica OX=5759 GN=EHI_096710 PE=2 SV=1	1	78.3256	7.3935e-20	176.04	155.92	78.326	1	52.1723	7.3935e-20	176.04	1	39.3382	0.00407068	39.338	1	53.5645	3.05512e-17	159.34	1	88.3852	3.87049e-05	88.385	1	78.3256	1.07983e-06	102.08	1	82.5896	5.89125e-05	82.59		1	C	DTMMTVIEEMKVLVSCDVFGGHYADERVFND	X;X;X;X;X;X;X;X;X;X;X;X;X;X;X;Carbamidomethyl (C);X;X;X;X;X;X;X;X;X;X;X;X;X;X;X	XXXXXXXXXXXPPPPPPPPPPPPPPPPXXXX	VLVSC(1)DVFGGHYADER	VLVSC(78.33)DVFGGHYADER	5	3	-0.72181	By MS/MS	By MS/MS	By MS/MS	By MS/MS
B1N2G1	61	B1N2G1	B1N2G1	>tr|B1N2G1|B1N2G1_ENTHI Uncharacterized protein OS=Entamoeba histolytica OX=5759 GN=EHI_152870 PE=4 SV=1	1	40.7782	0.0476988	40.778	13.731	40.778									0	0		NaN									1	40.7782	0.0476988	40.778		1	C	EEKMNQLQKEKKQEVCKEDNNEKVIKEPKTE	X;X;X;X;X;X;X;X;X;X;X;NEM H2O;X;X;X;Carbamidomethyl (C);X;X;X;X;X;X;X;X;X;X;X;X;X;X;X	XXXXXXXXXPPPPPPPPXXXXXXXXXXXXXX	EKKQEVC(1)K	EKKQEVC(40.78)K	7	3	1.5602	By matching	By matching	By matching	By matching
B1N2H1;C4M759	336;349	B1N2H1	B1N2H1	>tr|B1N2H1|B1N2H1_ENTHI T-complex protein 1 subunit eta OS=Entamoeba histolytica OX=5759 GN=EHI_044940 PE=3 SV=1;>tr|C4M759|C4M759_ENTHI T-complex protein 1 subunit eta OS=Entamoeba histolytica OX=5759 GN=EHI_083260 PE=3 SV=1	1	29.0711	0.00129634	55.776	31.554	29.071	0	0		NaN	0	0		NaN	0	0		NaN	0	0		NaN	1	29.0711	0.0463812	29.071	1	55.7761	0.00129634	55.776		1	C	EEQQIGKERYNLFSGCTAAKSSTIILRGGGE	X;X;X;X;X;X;X;X;X;X;X;X;X;X;X;Carbamidomethyl (C);X;X;X;X;X;X;X;X;X;X;X;X;X;X;X	XXXXXXXXXPPPPPPPPPPPXXXXXXXXXXX	YNLFSGC(1)TAAK	YNLFSGC(29.07)TAAK	7	2	-1.2713	By matching	By matching	By matching	By matching
B1N2H8;C4LYH0	107;132	B1N2H8;C4LYH0	C4LYH0	>tr|B1N2H8|B1N2H8_ENTHI Dolichyl-diphosphooligosaccharide--protein glycosyltransferase subunit 1 OS=Entamoeba histolytica OX=5759 GN=EHI_045470 PE=3 SV=1;>tr|C4LYH0|C4LYH0_ENTHI Dolichyl-diphosphooligosaccharide--protein glycosyltransferase subunit 1 OS=En	1	47.0374	0.000193053	66.246	49.035	47.037	1	47.0374	0.000193053	66.246					0	0		NaN														1	C	RSLSEKYKFLFTTHLCPLSDHIKCTTLCNLK;RSLSEKYKFLFTTHLCPLSDHIKCTTLFNLK	X;X;X;X;X;X;X;X;X;X;X;X;X;X;X;Carbamidomethyl (C);X;X;X;X;X;X;X;Carbamidomethyl (C);X;X;X;X;X;X;X	XXXXXXXXPPPPPPPPPPPPPPPXXXXXXXX	FLFTTHLC(1)PLSDHIK	FLFTTHLC(47.04)PLSDHIK	8	3	-1.4409	By MS/MS	By matching	By matching	By matching
B1N2I3	134	B1N2I3	B1N2I3	>tr|B1N2I3|B1N2I3_ENTHI 40S ribosomal protein S14, putative OS=Entamoeba histolytica OX=5759 GN=EHI_012360 PE=3 SV=1	1	28.1397	9.67554e-08	106.58	79.791	28.14	1	74.4752	4.84236e-06	94.09	1	53.3001	0.00132571	53.3	1	28.1397	6.20098e-05	78.244	1	62.1618	0.000549061	62.162	1	106.578	9.67554e-08	106.58	1	36.7751	3.74747e-06	95.264		1	C	MKIGRIEDVTPIPTDCTKRKGGRRGRRL___	X;X;X;X;X;X;X;X;X;X;X;X;X;X;X;Carbamidomethyl (C);X;X;X;X;X;X;X;X;X;X;X;X;X;X;X	XXPPPPPPPPPPPPPPPPPXXXXXXXXXXXX	IGRIEDVTPIPTDC(1)TKR	IGRIEDVTPIPTDC(28.14)TKR	14	3	-0.13205	By MS/MS	By MS/MS	By MS/MS	By MS/MS
B1N2I7	150	B1N2I7	B1N2I7	>tr|B1N2I7|B1N2I7_ENTHI 60S ribosomal protein L10a, putative OS=Entamoeba histolytica OX=5759 GN=EHI_012480 PE=2 SV=1	1	61.7795	0.00144254	61.78	25.355	61.78	0	0		NaN	1	55.4614	0.00208341	55.461	0	0		NaN	1	61.7795	0.00144254	61.78										1	C	LGKNEDLKVKINELQCQVKFQLKKVLCMGVA	X;X;X;X;X;X;X;X;X;X;X;X;X;X;X;Carbamidomethyl (C);X;X;X;X;X;X;X;X;X;X;X;X;X;X;X	XXXXXXXXXXPPPPPPPPPXXXXXXXXXXXX	INELQC(1)QVK	INELQC(61.78)QVK	6	2	-0.24452	By matching	By MS/MS	By matching	By MS/MS
B1N2I7	63	B1N2I7	B1N2I7	>tr|B1N2I7|B1N2I7_ENTHI 60S ribosomal protein L10a, putative OS=Entamoeba histolytica OX=5759 GN=EHI_012480 PE=2 SV=1	1	40.1868	0.00323892	40.187	25.396	40.187	0	0		NaN					0	0		NaN					0	0		NaN	1	40.1868	0.00323892	40.187		2	C	GSVKLPNITKANYKVCVLGDAQACEAAQKEN	X;X;X;X;X;X;X;X;X;X;X;X;X;X;X;Carbamidomethyl (C);X;X;X;X;X;X;X;Carbamidomethyl (C);X;X;X;X;X;X;X	XXXXXXXXXXXXXXPPPPPPPPPPPPPPPXX	VC(1)VLGDAQAC(1)EAAQK	VC(40.19)VLGDAQAC(40.19)EAAQK	2	2	-1.3498	By matching	By matching	By matching	By matching
B1N2I7	71	B1N2I7	B1N2I7	>tr|B1N2I7|B1N2I7_ENTHI 60S ribosomal protein L10a, putative OS=Entamoeba histolytica OX=5759 GN=EHI_012480 PE=2 SV=1	1	40.1868	0.00323892	40.187	25.396	40.187	0	0		NaN					0	0		NaN					0	0		NaN	1	40.1868	0.00323892	40.187		2	C	TKANYKVCVLGDAQACEAAQKENIPFMDVDA	X;X;X;X;X;X;X;Carbamidomethyl (C);X;X;X;X;X;X;X;Carbamidomethyl (C);X;X;X;X;X;X;X;X;X;X;X;X;X;X;X	XXXXXXPPPPPPPPPPPPPPPXXXXXXXXXX	VC(1)VLGDAQAC(1)EAAQK	VC(40.19)VLGDAQAC(40.19)EAAQK	10	2	-1.3498	By matching	By matching	By matching	By matching
B1N2J5;B1N3U1	329;402	B1N2J5;B1N3U1	B1N3U1	>tr|B1N2J5|B1N2J5_ENTHI p-glycoprotein 6, putative OS=Entamoeba histolytica OX=5759 GN=EHI_050640 PE=4 SV=1;>tr|B1N3U1|B1N3U1_ENTHI p-glycoprotein 6, putative OS=Entamoeba histolytica OX=5759 GN=EHI_081130 PE=4 SV=1	1	39.1709	0.00112068	39.171	26.703	39.171	0	0		NaN					1	39.1709	0.00112068	39.171														2	C	AENMDKIVAAAKMANCHNFICQLPQGYNTII	X;X;X;X;X;X;X;X;X;X;X;X;X;X;X;Carbamidomethyl (C);X;X;X;X;Carbamidomethyl (C);X;X;X;X;X;X;X;X;X;X	XXXXXXXXXXXXPPPPPPPPPPPPPPPPPPP	MANC(1)HNFIC(1)QLPQGYNTIIGER	MANC(39.17)HNFIC(39.17)QLPQGYNTIIGER	4	3	0.76735	By matching	By matching	By MS/MS	By matching
B1N2J5;B1N3U1	334;407	B1N2J5;B1N3U1	B1N3U1	>tr|B1N2J5|B1N2J5_ENTHI p-glycoprotein 6, putative OS=Entamoeba histolytica OX=5759 GN=EHI_050640 PE=4 SV=1;>tr|B1N3U1|B1N3U1_ENTHI p-glycoprotein 6, putative OS=Entamoeba histolytica OX=5759 GN=EHI_081130 PE=4 SV=1	1	39.1709	0.00112068	39.171	26.703	39.171	0	0		NaN					1	39.1709	0.00112068	39.171														2	C	KIVAAAKMANCHNFICQLPQGYNTIIGERGT	X;X;X;X;X;X;X;X;X;X;Carbamidomethyl (C);X;X;X;X;Carbamidomethyl (C);X;X;X;X;X;X;X;X;X;X;X;X;X;X;X	XXXXXXXPPPPPPPPPPPPPPPPPPPPPPXX	MANC(1)HNFIC(1)QLPQGYNTIIGER	MANC(39.17)HNFIC(39.17)QLPQGYNTIIGER	9	3	0.76735	By matching	By matching	By MS/MS	By matching
B1N2K5	80	B1N2K5	B1N2K5	>tr|B1N2K5|B1N2K5_ENTHI Uncharacterized protein OS=Entamoeba histolytica OX=5759 GN=EHI_110460 PE=4 SV=1	1	21.8186	2.8128e-05	87.388	82.014	21.819	1	87.3878	2.8128e-05	87.388					1	21.8186	0.0369227	21.819														3	C	CARGYSPTLHGLCLKCEHLFGPDCLDCDQTR	X;X;X;X;X;X;X;X;X;X;X;X;Carbamidomethyl (C);X;X;Carbamidomethyl (C);X;X;X;X;X;X;X;Carbamidomethyl (C);X;X;Carbamidomethyl (C);X;X;X;X	XXXXXXXXXXXXXXXPPPPPPPPPPPPPPPP	C(1)EHLFGPDC(1)LDC(1)DQTR	C(21.82)EHLFGPDC(21.82)LDC(21.82)DQTR	1	3	-0.8224	By MS/MS	By matching	By matching	By matching
B1N2K5	88	B1N2K5	B1N2K5	>tr|B1N2K5|B1N2K5_ENTHI Uncharacterized protein OS=Entamoeba histolytica OX=5759 GN=EHI_110460 PE=4 SV=1	1	21.8186	2.8128e-05	87.388	82.014	21.819	1	87.3878	2.8128e-05	87.388					1	21.8186	0.0369227	21.819														3	C	LHGLCLKCEHLFGPDCLDCDQTRSDKCTQCR	X;X;X;X;Carbamidomethyl (C);X;X;Carbamidomethyl (C);X;X;X;X;X;X;X;Carbamidomethyl (C);X;X;Carbamidomethyl (C);X;X;X;X;X;X;X;X;X;X;X;X	XXXXXXXPPPPPPPPPPPPPPPPXXXXXXXX	C(1)EHLFGPDC(1)LDC(1)DQTR	C(21.82)EHLFGPDC(21.82)LDC(21.82)DQTR	9	3	-0.8224	By MS/MS	By matching	By matching	By matching
B1N2K5	91	B1N2K5	B1N2K5	>tr|B1N2K5|B1N2K5_ENTHI Uncharacterized protein OS=Entamoeba histolytica OX=5759 GN=EHI_110460 PE=4 SV=1	1	21.8186	2.8128e-05	87.388	82.014	21.819	1	87.3878	2.8128e-05	87.388					1	21.8186	0.0369227	21.819														3	C	LCLKCEHLFGPDCLDCDQTRSDKCTQCRNGA	X;Carbamidomethyl (C);X;X;Carbamidomethyl (C);X;X;X;X;X;X;X;Carbamidomethyl (C);X;X;Carbamidomethyl (C);X;X;X;X;X;X;X;X;X;X;X;X;X;X;X	XXXXPPPPPPPPPPPPPPPPXXXXXXXXXXX	C(1)EHLFGPDC(1)LDC(1)DQTR	C(21.82)EHLFGPDC(21.82)LDC(21.82)DQTR	12	3	-0.8224	By MS/MS	By matching	By matching	By matching
B1N2K5	114	B1N2K5	B1N2K5	>tr|B1N2K5|B1N2K5_ENTHI Uncharacterized protein OS=Entamoeba histolytica OX=5759 GN=EHI_110460 PE=4 SV=1	1	69.1978	0.00156792	69.198	54.529	69.198	0	0		NaN	0.999414	32.3202	0.0246208	32.32	0	0		NaN	0	0		NaN	1	69.1978	0.00156792	69.198	1	29.4163	0.033678	29.416		1;2	C	CTQCRNGAIVTREGACIYCRKYFRQCAECDG	X;X;X;X;X;X;X;X;X;X;X;X;X;X;X;Carbamidomethyl (C);X;X;Carbamidomethyl (C);NEM;X;X;X;X;X;X;Carbamidomethyl (C);X;X;Carbamidomethyl (C);X;X	XXXXXXXXXXXXPPPPPPPPPXXXXXXXXXX	EGAC(1)IYC(1)R	EGAC(69.2)IYC(69.2)R	4	2	-0.97405	By matching	By MS/MS	By matching	By matching
B1N2K5	117	B1N2K5	B1N2K5	>tr|B1N2K5|B1N2K5_ENTHI Uncharacterized protein OS=Entamoeba histolytica OX=5759 GN=EHI_110460 PE=4 SV=1	1	69.1978	0.00156792	69.198	54.529	69.198	0	0		NaN					0	0		NaN	0	0		NaN	1	69.1978	0.00156792	69.198	1	29.4163	0.033678	29.416		2	C	CRNGAIVTREGACIYCRKYFRQCAECDGMTM	X;X;X;X;X;X;X;X;X;X;X;X;Carbamidomethyl (C);X;X;Carbamidomethyl (C);X;X;X;X;X;X;Carbamidomethyl (C);X;X;Carbamidomethyl (C);X;X;X;X;X	XXXXXXXXXPPPPPPPPXXXXXXXXXXXXXX	EGAC(1)IYC(1)R	EGAC(69.2)IYC(69.2)R	7	2	-0.97405	By matching	By matching	By matching	By matching
B1N2K5	77	B1N2K5	B1N2K5	>tr|B1N2K5|B1N2K5_ENTHI Uncharacterized protein OS=Entamoeba histolytica OX=5759 GN=EHI_110460 PE=4 SV=1	1	74.9616	2.27989e-05	91.043	70.418	74.962	1	74.9616	2.27989e-05	91.043					0	0		NaN					0	0		NaN	0	0		NaN		1	C	CKKCARGYSPTLHGLCLKCEHLFGPDCLDCD	X;X;X;X;X;X;X;X;X;X;X;X;X;X;X;Carbamidomethyl (C);X;X;Carbamidomethyl (C);X;X;X;X;X;X;X;Carbamidomethyl (C);X;X;Carbamidomethyl (C);X	XXXXXXPPPPPPPPPPPPXXXXXXXXXXXXX	GYSPTLHGLC(1)LK	GYSPTLHGLC(74.96)LK	10	3	0.19803	By MS/MS	By matching	By matching	By matching
B1N2K5	124	B1N2K5	B1N2K5	>tr|B1N2K5|B1N2K5_ENTHI Uncharacterized protein OS=Entamoeba histolytica OX=5759 GN=EHI_110460 PE=4 SV=1	1	86.1144	5.32664e-05	86.114	81.321	86.114	1	81.6763	8.97163e-05	81.676					1	86.1144	5.32664e-05	86.114					1	86.1144	5.32664e-05	86.114						2	C	TREGACIYCRKYFRQCAECDGMTMRCTKCSN	X;X;X;X;X;Carbamidomethyl (C);X;X;Carbamidomethyl (C);NEM;X;X;X;X;X;X;Carbamidomethyl (C);X;X;Carbamidomethyl (C);X;X;X;X;X;X;X;X;X;X;X;X	XXXXXXXXXXXXXXPPPPPPPPPPPXXXXXX	QC(1)AEC(1)DGMTMR	QC(86.11)AEC(86.11)DGMTMR	2	2	0.27082	By MS/MS	By matching	By MS/MS	By matching
B1N2K5	127	B1N2K5	B1N2K5	>tr|B1N2K5|B1N2K5_ENTHI Uncharacterized protein OS=Entamoeba histolytica OX=5759 GN=EHI_110460 PE=4 SV=1	1	86.1144	5.32664e-05	86.114	81.321	86.114	1	81.6763	8.97163e-05	81.676					1	86.1144	5.32664e-05	86.114					1	86.1144	5.32664e-05	86.114						2	C	GACIYCRKYFRQCAECDGMTMRCTKCSNGRK	X;X;Carbamidomethyl (C);X;X;Carbamidomethyl (C);NEM;X;X;X;X;X;X;Carbamidomethyl (C);X;X;Carbamidomethyl (C);X;X;X;X;X;X;X;X;X;X;X;X;X;X;X	XXXXXXXXXXXPPPPPPPPPPPXXXXXXXXX	QC(1)AEC(1)DGMTMR	QC(86.11)AEC(86.11)DGMTMR	5	2	0.27082	By MS/MS	By matching	By MS/MS	By matching
B1N2K6	384	B1N2K6	B1N2K6	>tr|B1N2K6|B1N2K6_ENTHI Protein kinase, putative OS=Entamoeba histolytica OX=5759 GN=EHI_068600 PE=3 SV=1	1	44.425	0.0178775	44.425	32.704	44.425	1	44.425	0.0178775	44.425					0	0		NaN					0	0		NaN	0	0		NaN			C	EEIKAHPFFKGFDFSCVEKNTPPYLPKLSSM	X;X;X;X;X;X;X;X;X;X;X;X;X;X;X;Carbamidomethyl (C);X;X;X;X;X;X;X;X;X;X;X;X;X;X;X	XXXXXXXXXXPPPPPPPPPXXXXXXXXXXXX	GFDFSC(1)VEK	GFDFSC(44.43)VEK	6	2	-0.51182	By matching	By matching	By matching	By matching
B1N2K6	440	B1N2K6	B1N2K6	>tr|B1N2K6|B1N2K6_ENTHI Protein kinase, putative OS=Entamoeba histolytica OX=5759 GN=EHI_068600 PE=3 SV=1	1	58.0826	0.0011562	58.083	46.479	58.083	0	0		NaN					1	58.0826	0.0011562	58.083	0	0		NaN	0	0		NaN						1	C	NLAFVGYTYKGFLNVCNPNKKKVSHSGVTLE	X;X;X;X;X;X;X;X;X;X;X;X;X;X;X;Carbamidomethyl (C);X;X;X;X;X;X;X;X;X;X;X;X;X;X;X	XXXXXXXXXXPPPPPPPPPPXXXXXXXXXXX	GFLNVC(1)NPNK	GFLNVC(58.08)NPNK	6	2	-0.081783	By matching	By matching	By MS/MS	By matching
B1N2L3;C4LXZ9	241;241	B1N2L3;C4LXZ9	C4LXZ9	>tr|B1N2L3|B1N2L3_ENTHI Galactose-specific adhesin light subunit, putative OS=Entamoeba histolytica OX=5759 GN=EHI_049690 PE=2 SV=1;>tr|C4LXZ9|C4LXZ9_ENTHI Galactose-inhibitable lectin 35 kDa subunit OS=Entamoeba histolytica OX=5759 GN=EHI_035690 PE=4 SV=1	1	73.4995	2.25697e-06	112.71	94.271	73.499	1	86.8981	9.87816e-05	86.898	1	63.6242	0.000791159	63.624	1	72.434	0.00130676	72.434	1	112.711	2.25697e-06	112.71	1	73.4995	0.000332081	73.499	1	80.1016	0.000201011	80.102		1	C	YKRHFYLPYRLDVDLCYQARKATDGRSTWTG;YKRHFYLPYRLDVDLCYQARKKNEAKEKWTG	X;X;X;X;X;X;X;X;X;X;X;X;X;X;X;Carbamidomethyl (C);X;X;X;X;X;X;X;X;X;X;X;X;X;X;X	XXXXXXXXXXPPPPPPPPPPXXXXXXXXXXX	LDVDLC(1)YQAR	LDVDLC(73.5)YQAR	6	2	-2.1994	By MS/MS	By MS/MS	By MS/MS	By MS/MS
B1N2N1;C4LXF5	109;368	B1N2N1	B1N2N1	>tr|B1N2N1|B1N2N1_ENTHI WD domain containing protein OS=Entamoeba histolytica OX=5759 GN=EHI_092070 PE=4 SV=1;>tr|C4LXF5|C4LXF5_ENTHI WD domain containing protein OS=Entamoeba histolytica OX=5759 GN=EHI_130870 PE=4 SV=1	1	44.3175	0.0181783	44.318	11.847	44.318																					1	44.3175	0.0181783	44.318			C	SCKFSPDSRIIASTGCDKNMRIWDGFTGSCL	X;X;X;X;X;X;X;X;X;X;X;X;X;X;X;Carbamidomethyl (C);X;X;X;X;X;X;X;X;X;X;X;X;X;X;X	XXXXXXXXXPPPPPPPPPXXXXXXXXXXXXX	IIASTGC(1)DK	IIASTGC(44.32)DK	7	2	-3.1469	By matching	By matching	By matching	By matching
B1N2N4;B1N610;C4LVZ3	242;122;245	B1N2N4;C4LVZ3	B1N2N4	>tr|B1N2N4|B1N2N4_ENTHI Threonine ammonia-lyase OS=Entamoeba histolytica OX=5759 GN=EhTD1 PE=3 SV=1;>tr|B1N610|B1N610_ENTHI Threonine dehydratase catabolic, putative (Fragment) OS=Entamoeba histolytica OX=5759 GN=EHI_056920 PE=4 SV=1;>tr|C4LVZ3|C4LVZ3_ENTH	1	24.0892	0.0395705	24.089	7.9353	24.089	1	24.0892	0.0395705	24.089													0	0		NaN						2	C	AECPSMAVSKAEHKICCVKTAKTMADGIAVK	X;X;Carbamidomethyl (C);X;X;Oxidation (M);X;X;X;X;X;X;X;NEM H2O;X;Carbamidomethyl (C);Carbamidomethyl (C);X;X;X;X;X;X;Oxidation (M);X;X;X;X;X;X;X	XXXXXXXXXXPPPPPPPPPXXXXXXXXXXXX	AEHKIC(1)C(1)VK	AEHKIC(24.09)C(24.09)VK	6	3	0.61114	By MS/MS	By matching	By matching	By matching
B1N2N4;B1N610;C4LVZ3	243;123;246	B1N2N4;C4LVZ3	B1N2N4	>tr|B1N2N4|B1N2N4_ENTHI Threonine ammonia-lyase OS=Entamoeba histolytica OX=5759 GN=EhTD1 PE=3 SV=1;>tr|B1N610|B1N610_ENTHI Threonine dehydratase catabolic, putative (Fragment) OS=Entamoeba histolytica OX=5759 GN=EHI_056920 PE=4 SV=1;>tr|C4LVZ3|C4LVZ3_ENTH	1	24.0892	0.0395705	24.089	7.9353	24.089	1	24.0892	0.0395705	24.089													0	0		NaN						2	C	ECPSMAVSKAEHKICCVKTAKTMADGIAVKA	X;Carbamidomethyl (C);X;X;Oxidation (M);X;X;X;X;X;X;X;NEM H2O;X;Carbamidomethyl (C);Carbamidomethyl (C);X;X;X;X;X;X;Oxidation (M);X;X;X;X;X;X;X;X	XXXXXXXXXPPPPPPPPPXXXXXXXXXXXXX	AEHKIC(1)C(1)VK	AEHKIC(24.09)C(24.09)VK	7	3	0.61114	By MS/MS	By matching	By matching	By matching
B1N2N4;C4LVZ3	115;118	B1N2N4;C4LVZ3	B1N2N4	>tr|B1N2N4|B1N2N4_ENTHI Threonine ammonia-lyase OS=Entamoeba histolytica OX=5759 GN=EhTD1 PE=3 SV=1;>tr|C4LVZ3|C4LVZ3_ENTHI Threonine ammonia-lyase OS=Entamoeba histolytica OX=5759 GN=EHI_126080 PE=3 SV=1	1	127.163	2.65134e-93	267.81	254.66	127.16	1	155.173	2.65134e-93	267.81	1	36.9353	0.0028232	36.935	1	142.318	3.66846e-19	142.32	1	58.3237	5.01219e-05	58.324	1	127.163	1.58377e-14	127.16	1	92.886	1.35727e-08	92.886		1	C	GNHAQGVAFASTSAGCKATIVMPEFASTAKV	X;X;X;X;X;X;X;X;X;X;X;X;X;X;X;Carbamidomethyl (C);X;X;X;X;X;Oxidation (M);X;X;X;X;X;X;X;X;X	PPPPPPPPPPPPPPPPPXXXXXXXXXXXXXX	GVVAASAGNHAQGVAFASTSAGC(1)K	GVVAASAGNHAQGVAFASTSAGC(127.16)K	23	3	1.115	By MS/MS	By MS/MS	By MS/MS	By MS/MS
B1N2N4;B1N610;C4LVZ3	229;109;232	B1N2N4;C4LVZ3	B1N2N4	>tr|B1N2N4|B1N2N4_ENTHI Threonine ammonia-lyase OS=Entamoeba histolytica OX=5759 GN=EhTD1 PE=3 SV=1;>tr|B1N610|B1N610_ENTHI Threonine dehydratase catabolic, putative (Fragment) OS=Entamoeba histolytica OX=5759 GN=EHI_056920 PE=4 SV=1;>tr|C4LVZ3|C4LVZ3_ENTH	1	82.3489	9.26749e-07	103.77	86.555	82.349	1	72.3155	7.72974e-05	72.315	1	62.8132	0.000283324	62.813	1	77.7262	9.26749e-07	103.77	1	78.95	7.15348e-05	78.95	1	82.3489	4.88481e-05	82.349	1	103.16	9.81988e-07	103.16		1	C	QIKPEIRIIGVQAAECPSMAVSKAEHKICCV	X;X;X;X;X;X;X;X;X;X;X;X;X;X;X;Carbamidomethyl (C);X;X;Oxidation (M);X;X;X;X;X;X;X;NEM H2O;X;Carbamidomethyl (C);Carbamidomethyl (C);X	XXXXXXXPPPPPPPPPPPPPPPPXXXXXXXX	IIGVQAAEC(1)PSMAVSK	IIGVQAAEC(82.35)PSMAVSK	9	2	0.52924	By MS/MS	By MS/MS	By MS/MS	By MS/MS
B1N2N4;B1N610;C4LVZ3	158;38;161	B1N2N4;C4LVZ3	B1N2N4	>tr|B1N2N4|B1N2N4_ENTHI Threonine ammonia-lyase OS=Entamoeba histolytica OX=5759 GN=EhTD1 PE=3 SV=1;>tr|B1N610|B1N610_ENTHI Threonine dehydratase catabolic, putative (Fragment) OS=Entamoeba histolytica OX=5759 GN=EHI_056920 PE=4 SV=1;>tr|C4LVZ3|C4LVZ3_ENTH	1	152.246	3.78578e-22	152.25	134.35	152.25	1	116.61	3.93157e-10	116.87					1	93.3419	1.26206e-05	93.342					1	152.246	3.78578e-22	152.25						1	C	HGKVFDESLAYAMQLCKEEGKTFVHPFNDPW	X;X;NEM H2O;X;X;X;X;X;X;X;X;X;Oxidation (M);X;X;Carbamidomethyl (C);X;X;X;X;X;X;X;X;X;X;X;X;X;X;X	XXXPPPPPPPPPPPPPPPPPPXXXXXXXXXX	VFDESLAYAMQLC(1)KEEGK	VFDESLAYAMQLC(152.25)KEEGK	13	3	-1.5919	By MS/MS	By matching	By MS/MS	By matching
B1N2N4	23	B1N2N4	B1N2N4	>tr|B1N2N4|B1N2N4_ENTHI Threonine ammonia-lyase OS=Entamoeba histolytica OX=5759 GN=EhTD1 PE=3 SV=1	1	58.924	1.15215e-05	58.924	54.51	58.924	1	58.924	1.15215e-05	58.924																						1	C	LKVPHDVVGDISNTECPITISDVYAASKRIK	X;X;X;X;X;X;X;X;X;X;X;X;X;X;X;Carbamidomethyl (C);X;X;X;X;X;X;X;X;X;X;X;X;X;X;X	XXPPPPPPPPPPPPPPPPPPPPPPPPPPPXX	VPHDVVGDISNTEC(1)PITISDVYAASKR	VPHDVVGDISNTEC(58.92)PITISDVYAASKR	14	4	-1.2474	By MS/MS	By matching	By matching	By matching
B1N2P0;B1N621	286;242	B1N2P0;B1N621	B1N2P0	>tr|B1N2P0|B1N2P0_ENTHI Actin OS=Entamoeba histolytica OX=5759 GN=EHI_107290 PE=2 SV=1;>tr|B1N621|B1N621_ENTHI Actin, putative OS=Entamoeba histolytica OX=5759 GN=EHI_043640 PE=3 SV=1	1	131.129	1.99125e-22	131.13	118.31	131.13	1	121.725	4.7531e-18	121.72	0	0		NaN	1	124.82	2.67691e-18	124.82	1	62.4642	0.012496	62.464	1	131.129	1.99125e-22	131.13	0	0		NaN		1	C	ECNGIHETTYNSIMKCDVDIRKDLYGNIVLS	X;Carbamidomethyl (C);NEM;X;X;X;X;X;X;X;X;X;X;X;Oxidation (M);X;Carbamidomethyl (C);X;X;X;X;X;X;X;X;X;X;X;X;X;X;X	XXXXXXXXXXXXXXXPPPPPPPPPPPPPPPP	C(1)DVDIRKDLYGNIVLSGGTSMYPGINTR	C(131.13)DVDIRKDLYGNIVLSGGTSMYPGINTR	1	4	-0.038428	By MS/MS	By matching	By MS/MS	By MS/MS
B1N2P0;B1N621	258;214	B1N2P0;B1N621	B1N2P0	>tr|B1N2P0|B1N2P0_ENTHI Actin OS=Entamoeba histolytica OX=5759 GN=EHI_107290 PE=2 SV=1;>tr|B1N621|B1N621_ENTHI Actin, putative OS=Entamoeba histolytica OX=5759 GN=EHI_043640 PE=3 SV=1	1	267.64	5.76797e-129	285.7	264.93	267.64	1	285.697	5.76797e-129	285.7					1	267.64	4.45054e-115	267.64					1	105.533	3.51372e-17	105.53						1;2	C	LPDGQVITVGNERFRCPEALFQPSFLGMECN	X;X;X;X;X;X;X;X;X;X;X;X;X;X;X;Carbamidomethyl (C);X;X;X;X;X;X;X;X;X;X;X;Oxidation (M);X;Carbamidomethyl (C);NEM;X	XXXXXXXXXXXXXPPPPPPPPPPPPPPPPPP	FRC(1)PEALFQPSFLGMEC(1)NGIHETTYNSIMK	FRC(267.64)PEALFQPSFLGMEC(267.64)NGIHETTYNSIMK	3	3	-1.4114	By MS/MS	By matching	By MS/MS	By matching
B1N2P0;B1N621	272;228	B1N2P0;B1N621	B1N2P0	>tr|B1N2P0|B1N2P0_ENTHI Actin OS=Entamoeba histolytica OX=5759 GN=EHI_107290 PE=2 SV=1;>tr|B1N621|B1N621_ENTHI Actin, putative OS=Entamoeba histolytica OX=5759 GN=EHI_043640 PE=3 SV=1	1	267.64	5.76797e-129	285.7	264.93	267.64	1	285.697	5.76797e-129	285.7					1	267.64	4.45054e-115	267.64					1	105.533	3.51372e-17	105.53						2	C	RCPEALFQPSFLGMECNGIHETTYNSIMKCD	X;Carbamidomethyl (C);X;X;X;X;X;X;X;X;X;X;X;Oxidation (M);X;Carbamidomethyl (C);X;X;X;X;X;X;X;X;X;X;X;Oxidation (M);X;Carbamidomethyl (C);NEM;NEM H2O;Propionamide_aa;X	PPPPPPPPPPPPPPPPPPPPPPPPPPPPPXX	FRC(1)PEALFQPSFLGMEC(1)NGIHETTYNSIMK	FRC(267.64)PEALFQPSFLGMEC(267.64)NGIHETTYNSIMK	17	3	-1.4114	By MS/MS	By matching	By MS/MS	By matching
B1N2P0;B1N621	218;174	B1N2P0;B1N621	B1N2P0	>tr|B1N2P0|B1N2P0_ENTHI Actin OS=Entamoeba histolytica OX=5759 GN=EHI_107290 PE=2 SV=1;>tr|B1N621|B1N621_ENTHI Actin, putative OS=Entamoeba histolytica OX=5759 GN=EHI_043640 PE=3 SV=1	1	67.8773	1.30626e-29	205.18	175.64	67.877	1	81.1435	2.14801e-19	175.91	1	62.528	2.79678e-06	98.508	1	144.178	3.22247e-23	164.01	1	120.872	5.57253e-16	142.45	1	67.8773	1.30626e-29	205.18	1	28.8121	1.01168e-06	98.592		1	C	TTAEREIVRDIKEKLCYVAEDFNEEMQKAAS	X;X;X;X;X;X;X;X;X;X;X;NEM H2O;X;NEM H2O;X;Carbamidomethyl (C);X;X;X;X;X;X;X;X;X;Oxidation (M);X;NEM H2O;X;X;X	XXXXXXXXXXXXPPPPPPPPPPPPPPPPPPP	LC(1)YVAEDFNEEMQKAASSSELEK	LC(67.88)YVAEDFNEEMQKAASSSELEK	2	3	-0.092696	By MS/MS	By MS/MS	By MS/MS	By MS/MS
B1N2P0;B1N5D1	18;18	B1N2P0	B1N2P0	>tr|B1N2P0|B1N2P0_ENTHI Actin OS=Entamoeba histolytica OX=5759 GN=EHI_107290 PE=2 SV=1;>tr|B1N5D1|B1N5D1_ENTHI Actin 2 protein, putative (Fragment) OS=Entamoeba histolytica OX=5759 GN=EHI_161200 PE=4 SV=1	1	141.228	1.56693e-30	188.58	173.03	141.23	1	121.03	2.01542e-10	121.03	1	178.508	1.24384e-26	178.51	1	56.1208	2.33272e-29	188.27	1	188.578	1.56693e-30	188.58	1	181.862	7.14767e-27	181.86	1	141.228	1.24384e-26	178.51		1	C	DEEVQALVVDNGSGMCKAGFAGDDAPRAVFP	X;X;X;X;X;X;X;X;X;X;X;X;X;X;Oxidation (M);Carbamidomethyl (C);NEM H2O;Propionamide_aa;X;X;X;X;X;X;X;X;X;X;X;X;X;X	PPPPPPPPPPPPPPPPPPPPPPPPPPPXXXX	GDEEVQALVVDNGSGMC(1)KAGFAGDDAPR	GDEEVQALVVDNGSGMC(141.23)KAGFAGDDAPR	17	3	-0.77267	By MS/MS	By MS/MS	By MS/MS	By MS/MS
B1N2Q5	21	B1N2Q5	B1N2Q5	>tr|B1N2Q5|B1N2Q5_ENTHI Actin-related protein 2/3 complex subunit 5 OS=Entamoeba histolytica OX=5759 GN=EHI_103440 PE=3 SV=1	1	53.0129	4.16596e-06	118.28	80.934	53.013	1	53.0129	0.00210113	53.013	1	74.5333	0.000311557	74.533					1	118.278	1.8113e-05	118.28					1	103.312	4.16596e-06	103.31		1	C	PAVDYSAVVEKHLGICDQVIKGGMSIEEGLK	X;X;X;X;X;X;X;X;X;X;X;X;X;X;X;Carbamidomethyl (C);X;X;X;X;X;X;X;X;X;X;X;X;X;X;X	XXXXXXXXXXXPPPPPPPPPPXXXXXXXXXX	HLGIC(1)DQVIK	HLGIC(53.01)DQVIK	5	2	1.8104	By MS/MS	By MS/MS	By matching	By MS/MS
B1N2Q5	125	B1N2Q5	B1N2Q5	>tr|B1N2Q5|B1N2Q5_ENTHI Actin-related protein 2/3 complex subunit 5 OS=Entamoeba histolytica OX=5759 GN=EHI_103440 PE=3 SV=1	1	48.091	0.00123595	63.816	58.336	48.091	0	0		NaN	1	63.8162	0.00123595	63.816	0	0		NaN	1	48.091	0.00596155	48.091	0	0		NaN	0	0		NaN		1	C	MFKWFNAIYKVGGDGCVMRAVSRRKAL____	X;X;X;X;X;X;X;X;X;X;X;X;X;X;X;Carbamidomethyl (C);X;X;X;X;X;X;X;X;X;X;X;X;X;X;X	XXXXXXXXXXPPPPPPPPPXXXXXXXXXXXX	VGGDGC(1)VMR	VGGDGC(48.09)VMR	6	2	-0.22025	By matching	By MS/MS	By matching	By MS/MS
B1N2S4;C4LZ00;B1N501	207;207;207	B1N2S4	B1N2S4	>tr|B1N2S4|B1N2S4_ENTHI WD repeat protein 2, putative OS=Entamoeba histolytica OX=5759 GN=EHI_142190 PE=4 SV=1;>tr|C4LZ00|C4LZ00_ENTHI WD repeat protein OS=Entamoeba histolytica OX=5759 GN=EHI_118160 PE=4 SV=1;>tr|B1N501|B1N501_ENTHI 66 kDa stress protein,	1	62.8132	0.000261783	62.813	57.272	62.813					1	35.0913	0.0105914	35.091					1	56.3391	0.000420975	56.339					1	62.8132	0.000261783	62.813		1;2	C	SRFINCGRFSPDGSLCVCVSSDKSISVFDGK	X;X;X;X;X;X;X;X;X;X;X;X;X;X;X;Carbamidomethyl (C);X;Carbamidomethyl (C);NEM;X;X;X;X;X;X;X;X;X;X;X;X;X	XXXXXXXXPPPPPPPPPPPPPPPXXXXXXXX	FSPDGSLC(1)VC(1)VSSDK	FSPDGSLC(62.81)VC(62.81)VSSDK	8	2	-1.9725	By matching	By MS/MS	By matching	By MS/MS
B1N2S4;C4LZ00;B1N501	209;209;209	B1N2S4	B1N2S4	>tr|B1N2S4|B1N2S4_ENTHI WD repeat protein 2, putative OS=Entamoeba histolytica OX=5759 GN=EHI_142190 PE=4 SV=1;>tr|C4LZ00|C4LZ00_ENTHI WD repeat protein OS=Entamoeba histolytica OX=5759 GN=EHI_118160 PE=4 SV=1;>tr|B1N501|B1N501_ENTHI 66 kDa stress protein,	1	62.8132	0.000261783	62.813	57.272	62.813	0.904341	9.75609	0.0219773	31.115	1	35.0913	0.0105914	35.091					1	56.3391	0.000420975	56.339					1	62.8132	0.000261783	62.813		1;2	C	FINCGRFSPDGSLCVCVSSDKSISVFDGKTG	X;X;X;X;X;X;X;X;X;X;X;X;X;Carbamidomethyl (C);NEM;X;Carbamidomethyl (C);X;X;X;X;X;X;X;X;X;X;X;X;X;X;X	XXXXXXPPPPPPPPPPPPPPPXXXXXXXXXX	FSPDGSLC(1)VC(1)VSSDK	FSPDGSLC(62.81)VC(62.81)VSSDK	10	2	-1.9725	By MS/MS	By MS/MS	By matching	By MS/MS
B1N2S4;C4LZ00	376;381	B1N2S4	B1N2S4	>tr|B1N2S4|B1N2S4_ENTHI WD repeat protein 2, putative OS=Entamoeba histolytica OX=5759 GN=EHI_142190 PE=4 SV=1;>tr|C4LZ00|C4LZ00_ENTHI WD repeat protein OS=Entamoeba histolytica OX=5759 GN=EHI_118160 PE=4 SV=1	1	64.589	4.31045e-05	78.342	53.566	64.589	1	41.9115	0.00103649	41.911	0	0		NaN	1	48.077	0.000620305	56.551	0	0		NaN	1	64.589	7.21316e-05	64.589	1	67.1095	4.31045e-05	78.342		1;2	C	IVNCGDKIATLGSDDCVKIIDKSRMEYEDSI	X;X;X;Carbamidomethyl (C);NEM;NEM H2O;X;X;X;X;X;X;X;X;X;X;X;Carbamidomethyl (C);X;X;X;X;X;X;X;X;X;X;X;X;X;X;X	PPPPPPPPPPPPPPPPPPXXXXXXXXXXXXX	INDIVNC(1)GDKIATLGSDDC(1)VK	INDIVNC(64.59)GDKIATLGSDDC(64.59)VK	19	3	-0.85927	By MS/MS	By matching	By MS/MS	By matching
B1N2S4;C4LZ00;B1N501	120;120;120	B1N2S4	B1N2S4	>tr|B1N2S4|B1N2S4_ENTHI WD repeat protein 2, putative OS=Entamoeba histolytica OX=5759 GN=EHI_142190 PE=4 SV=1;>tr|C4LZ00|C4LZ00_ENTHI WD repeat protein OS=Entamoeba histolytica OX=5759 GN=EHI_118160 PE=4 SV=1;>tr|B1N501|B1N501_ENTHI 66 kDa stress protein,	1	57.3472	0.00346258	57.347	21.991	57.347					1	40.4964	0.00684564	40.496	0	0		NaN	1	44.6394	0.00452227	55.112	0	0		NaN	1	57.3472	0.00346258	57.347		1	C	GPIYDIAWTGDSQRICVVGEGKEKLGSVFMW	X;X;X;X;X;X;X;X;X;X;X;X;X;X;X;Carbamidomethyl (C);X;X;X;X;X;X;X;X;X;X;X;X;X;X;X	XXXXXXXXXXXXXXPPPPPPPPPPXXXXXXX	IC(1)VVGEGKEK	IC(57.35)VVGEGKEK	2	2	0.03738	By matching	By MS/MS	By matching	By MS/MS
B1N2S4;C4LZ00	579;584	B1N2S4	B1N2S4	>tr|B1N2S4|B1N2S4_ENTHI WD repeat protein 2, putative OS=Entamoeba histolytica OX=5759 GN=EHI_142190 PE=4 SV=1;>tr|C4LZ00|C4LZ00_ENTHI WD repeat protein OS=Entamoeba histolytica OX=5759 GN=EHI_118160 PE=4 SV=1	1	59.3725	1.23155e-07	94.82	48.485	59.372	1	71.1175	1.23155e-07	94.82					1	44.1636	0.00033203	44.164					1	59.3725	1.06539e-05	59.372						1	C	GVNDVFIDEDGKIFTCGADSTIKVSSL____	X;X;X;X;X;X;X;X;X;X;X;X;X;X;X;Carbamidomethyl (C);X;X;X;X;X;X;X;X;X;X;X;X;X;X;X	PPPPPPPPPPPPPPPPPPPPPPPXXXXXXXX	VHPLGVNDVFIDEDGKIFTC(1)GADSTIK	VHPLGVNDVFIDEDGKIFTC(59.37)GADSTIK	20	4	-1.724	By MS/MS	By matching	By MS/MS	By matching
B1N2S4;C4LZ00	364;369	B1N2S4	B1N2S4	>tr|B1N2S4|B1N2S4_ENTHI WD repeat protein 2, putative OS=Entamoeba histolytica OX=5759 GN=EHI_142190 PE=4 SV=1;>tr|C4LZ00|C4LZ00_ENTHI WD repeat protein OS=Entamoeba histolytica OX=5759 GN=EHI_118160 PE=4 SV=1	1	64.589	4.57554e-06	101.3	66.403	64.589	1	41.9115	0.00103649	44.543	0	0		NaN	1	48.077	0.000153614	82.489	1	101.295	4.57554e-06	101.3	1	64.589	7.21316e-05	64.589	1	67.1095	4.05202e-05	94.465		1;2	C	ISGKGHCTRINDIVNCGDKIATLGSDDCVKI	X;X;X;X;X;X;X;X;X;X;X;X;X;X;X;Carbamidomethyl (C);X;X;X;X;X;X;X;X;X;X;X;Carbamidomethyl (C);NEM;NEM H2O;X;X;X	XXXXXXXXXPPPPPPPPPPPPPPPPPPPPPX	INDIVNC(1)GDKIATLGSDDC(1)VK	INDIVNC(64.59)GDKIATLGSDDC(64.59)VK	7	3	-0.85927	By MS/MS	By matching	By MS/MS	By MS/MS
B1N2S4;C4LZ00;B1N501	65;65;65	B1N2S4	B1N2S4	>tr|B1N2S4|B1N2S4_ENTHI WD repeat protein 2, putative OS=Entamoeba histolytica OX=5759 GN=EHI_142190 PE=4 SV=1;>tr|C4LZ00|C4LZ00_ENTHI WD repeat protein OS=Entamoeba histolytica OX=5759 GN=EHI_118160 PE=4 SV=1;>tr|B1N501|B1N501_ENTHI 66 kDa stress protein,	1	89.6627	1.15614e-17	136.96	121.84	89.663	1	114.461	1.29396e-12	114.46	1	49.6596	0.000362931	49.66	1	112.581	1.23887e-10	112.58	1	136.965	1.15614e-17	136.96	1	89.6627	7.16644e-08	89.663	1	90.4641	6.5677e-08	90.464		1	C	PLDTDIYYEHTSETTCAKYSPSGYYICSGDV	X;X;X;X;X;X;X;X;X;X;X;X;X;X;X;Carbamidomethyl (C);X;X;X;X;X;X;X;X;X;X;Carbamidomethyl (C);NEM;NEM H2O;X;X;X;X	PPPPPPPPPPPPPPPPPPXXXXXXXXXXXXX	NVNNPLDTDIYYEHTSETTC(1)AK	NVNNPLDTDIYYEHTSETTC(89.66)AK	20	3	-0.36819	By MS/MS	By MS/MS	By MS/MS	By MS/MS
B1N2S4;C4LZ00	258;258	B1N2S4	B1N2S4	>tr|B1N2S4|B1N2S4_ENTHI WD repeat protein 2, putative OS=Entamoeba histolytica OX=5759 GN=EHI_142190 PE=4 SV=1;>tr|C4LZ00|C4LZ00_ENTHI WD repeat protein OS=Entamoeba histolytica OX=5759 GN=EHI_118160 PE=4 SV=1	1	74.6982	0.000127521	74.698	53.547	74.698	1	42.7971	0.00467312	42.797	0	0		NaN	1	74.6982	0.000127521	74.698	1	58.0983	0.000807489	58.098	0	0		NaN	0	0		NaN		1	C	GSDSKTFITASADKTCKVWNAEDGSVIKTIE	X;X;X;X;X;X;X;X;X;X;X;X;X;X;X;Carbamidomethyl (C);X;X;X;X;X;X;X;X;X;X;X;X;X;X;X	XXXXXPPPPPPPPPPPPXXXXXXXXXXXXXX	TFITASADKTC(1)K	TFITASADKTC(74.7)K	11	3	-0.080793	By MS/MS	By matching	By MS/MS	By MS/MS
B1N2S4;C4LZ00;B1N501	154;154;154	B1N2S4	B1N2S4	>tr|B1N2S4|B1N2S4_ENTHI WD repeat protein 2, putative OS=Entamoeba histolytica OX=5759 GN=EHI_142190 PE=4 SV=1;>tr|C4LZ00|C4LZ00_ENTHI WD repeat protein OS=Entamoeba histolytica OX=5759 GN=EHI_118160 PE=4 SV=1;>tr|B1N501|B1N501_ENTHI 66 kDa stress protein,	1	81.2963	0.000966821	91.318	70.798	81.296	1	74.3009	0.00167974	74.301	1	77.3176	0.00150888	77.318	1	91.318	0.000966821	91.318	1	69.8246	0.00193329	69.825	1	81.2963	0.00128352	81.296	1	44.3492	0.012759	44.349		1	C	SSVGEISGQTKTLLSCDFRGTRPFRLITTGE	X;X;X;X;X;X;X;X;X;X;X;X;X;X;X;Carbamidomethyl (C);X;X;X;X;X;X;X;X;X;X;X;X;X;X;X	XXXXXXXXXXXPPPPPPPPXXXXXXXXXXXX	TLLSC(1)DFR	TLLSC(81.3)DFR	5	2	-0.44055	By MS/MS	By MS/MS	By MS/MS	By MS/MS
B1N2S4;C4LZ00;B1N501	76;76;76	B1N2S4	B1N2S4	>tr|B1N2S4|B1N2S4_ENTHI WD repeat protein 2, putative OS=Entamoeba histolytica OX=5759 GN=EHI_142190 PE=4 SV=1;>tr|C4LZ00|C4LZ00_ENTHI WD repeat protein OS=Entamoeba histolytica OX=5759 GN=EHI_118160 PE=4 SV=1;>tr|B1N501|B1N501_ENTHI 66 kDa stress protein,	1	82.8772	3.03748e-24	164.93	136.65	82.877	1	164.93	3.03748e-24	164.93	1	69.0814	7.27312e-05	69.081	1	101.055	9.30396e-07	101.05	1	113.33	4.48342e-08	113.33	1	82.8772	3.99406e-05	82.877	1	26.8371	3.69269e-05	84.375		1	C	SETTCAKYSPSGYYICSGDVQGNVRIWDTTQ	X;X;X;X;Carbamidomethyl (C);NEM H2O;X;X;X;X;X;X;X;X;X;X;Carbamidomethyl (C);X;X;X;X;X;X;X;X;X;X;X;X;X;X;X	XXXXXXXPPPPPPPPPPPPPPPPPPXXXXXX	YSPSGYYIC(1)SGDVQGNVR	YSPSGYYIC(82.88)SGDVQGNVR	9	2	0.46342	By MS/MS	By MS/MS	By MS/MS	By MS/MS
B1N2V4	233	B1N2V4	B1N2V4	>tr|B1N2V4|B1N2V4_ENTHI Galactose-inhibitable lectin small subunit, putative OS=Entamoeba histolytica OX=5759 GN=EHI_159870 PE=2 SV=1	1	66.2702	0.00571838	66.27	42.24	66.27									1	66.2702	0.00571838	66.27														1	C	ECNVDGYYKGLKAQDCVNEKQSTGASLMHAK	X;Carbamidomethyl (C);X;X;X;X;X;X;X;X;X;X;X;X;X;Carbamidomethyl (C);X;X;X;X;X;X;X;X;X;X;X;X;X;X;X	XXXXXXXXXXXXPPPPPPPPXXXXXXXXXXX	AQDC(1)VNEK	AQDC(66.27)VNEK	4	2	0.2728	By matching	By matching	By MS/MS	By matching
B1N2V4	212	B1N2V4	B1N2V4	>tr|B1N2V4|B1N2V4_ENTHI Galactose-inhibitable lectin small subunit, putative OS=Entamoeba histolytica OX=5759 GN=EHI_159870 PE=2 SV=1	1	123.023	4.57776e-24	164.63	154.01	123.02	1	164.626	4.57776e-24	164.63					1	88.427	3.74534e-05	88.427					1	123.023	2.8993e-10	123.02						2	C	KEMCYEVDDDNVKAYCGSAYNECNVDGYYKG	X;X;X;Carbamidomethyl (C);X;X;X;X;X;X;X;X;X;X;X;Carbamidomethyl (C);X;X;X;X;X;X;Carbamidomethyl (C);X;X;X;X;X;X;X;X	XXXXXXXXXXXXXPPPPPPPPPPPPPPPPPX	AYC(1)GSAYNEC(1)NVDGYYK	AYC(123.02)GSAYNEC(123.02)NVDGYYK	3	2	0.18968	By MS/MS	By matching	By MS/MS	By matching
B1N2V4	219	B1N2V4	B1N2V4	>tr|B1N2V4|B1N2V4_ENTHI Galactose-inhibitable lectin small subunit, putative OS=Entamoeba histolytica OX=5759 GN=EHI_159870 PE=2 SV=1	1	123.023	4.57776e-24	164.63	154.01	123.02	1	164.626	4.57776e-24	164.63					1	88.427	3.74534e-05	88.427					1	123.023	2.8993e-10	123.02						2	C	DDDNVKAYCGSAYNECNVDGYYKGLKAQDCV	X;X;X;X;X;X;X;X;Carbamidomethyl (C);X;X;X;X;X;X;Carbamidomethyl (C);X;X;X;X;X;X;X;X;X;X;X;X;X;Carbamidomethyl (C);X	XXXXXXPPPPPPPPPPPPPPPPPXXXXXXXX	AYC(1)GSAYNEC(1)NVDGYYK	AYC(123.02)GSAYNEC(123.02)NVDGYYK	10	2	0.18968	By MS/MS	By matching	By MS/MS	By matching
B1N2V4	200	B1N2V4	B1N2V4	>tr|B1N2V4|B1N2V4_ENTHI Galactose-inhibitable lectin small subunit, putative OS=Entamoeba histolytica OX=5759 GN=EHI_159870 PE=2 SV=1	1	31.8812	3.10618e-05	88.021	79.95	31.881	1	88.0206	3.10618e-05	88.021					1	63.6025	0.000596704	63.602					1	31.8812	0.0353678	31.881						1	C	HQISWDYNRYAFKEMCYEVDDDNVKAYCGSA	X;X;X;X;X;X;X;X;X;X;X;X;X;X;X;Carbamidomethyl (C);X;X;X;X;X;X;X;X;X;X;X;Carbamidomethyl (C);X;X;X	XXXXXXXXXXXXXPPPPPPPPPPPPXXXXXX	EMC(1)YEVDDDNVK	EMC(31.88)YEVDDDNVK	3	2	-0.46118	By MS/MS	By matching	By MS/MS	By matching
B1N2V8	237	B1N2V8	B1N2V8	>tr|B1N2V8|B1N2V8_ENTHI Adaptor protein (AP) family protein OS=Entamoeba histolytica OX=5759 GN=EHI_013040 PE=3 SV=1	1	51.7487	0.000955393	91.853	69.14	51.749	1	80.4381	0.00133213	80.438	1	64.4204	0.00626633	64.42	1	91.8534	0.000955393	91.853	1	68.2235	0.0104405	68.224	1	51.7487	0.00682222	51.749	1	69.5982	0.00194611	69.598		1	C	IATYIPKESKEAENICERVINKLTHNNPSVV	X;X;X;X;X;X;X;X;X;X;X;X;X;X;X;Carbamidomethyl (C);X;X;X;X;X;X;X;X;X;X;X;X;X;X;X	XXXXXXXXXXPPPPPPPPXXXXXXXXXXXXX	EAENIC(1)ER	EAENIC(51.75)ER	6	2	-0.11875	By MS/MS	By MS/MS	By MS/MS	By matching
B1N2V8	432	B1N2V8	B1N2V8	>tr|B1N2V8|B1N2V8_ENTHI Adaptor protein (AP) family protein OS=Entamoeba histolytica OX=5759 GN=EHI_013040 PE=3 SV=1	1	105.992	1.71478e-07	105.99	83.35	105.99	1	89.2595	1.43679e-05	89.26	1	31.0889	0.0229105	31.089	1	59.294	0.000558888	59.294	1	51.7707	0.00148944	51.771	1	105.992	1.71478e-07	105.99	1	58.7233	0.000582384	58.723		1	C	FRKYPQKYLPVIAKLCDNLNTLDDPNAKAAM	X;X;X;X;X;X;X;X;X;X;X;X;X;X;X;Carbamidomethyl (C);X;X;X;X;X;X;X;X;X;X;X;X;X;X;X	XXXXXXXXXXXXXXPPPPPPPPPPPPPPXXX	LC(1)DNLNTLDDPNAK	LC(105.99)DNLNTLDDPNAK	2	2	1.5398	By MS/MS	By MS/MS	By MS/MS	By MS/MS
B1N2W4;B1N4G2;C4LUI1;C4MAJ2	216;345;345;345	B1N2W4;B1N4G2	B1N4G2	>tr|B1N2W4|B1N2W4_ENTHI VWFA domain-containing protein OS=Entamoeba histolytica OX=5759 GN=EHI_098430 PE=4 SV=1;>tr|B1N4G2|B1N4G2_ENTHI Uncharacterized protein (Fragment) OS=Entamoeba histolytica OX=5759 GN=EHI_187800 PE=4 SV=1;>tr|C4LUI1|C4LUI1_ENTHI Unch	1	53.7748	0.00420484	71.379	59.658	53.775	1	71.3794	0.00420484	71.379					1	53.7748	0.00519671	53.775					1	53.7748	0.00519671	53.775						1	C	LSKKNSLHGVGLGRSCDVELIRNIGRIGNGI	X;X;X;X;X;X;X;X;X;X;X;X;X;X;X;Carbamidomethyl (C);X;X;X;X;X;X;X;X;X;X;X;X;X;X;X	XXXXXXXXXXXXXXPPPPPPPPXXXXXXXXX	SC(1)DVELIR	SC(53.77)DVELIR	2	2	-0.37184	By MS/MS	By matching	By MS/MS	By matching
B1N2Z3	58	B1N2Z3	B1N2Z3	>tr|B1N2Z3|B1N2Z3_ENTHI 60S acidic ribosomal protein P0 OS=Entamoeba histolytica OX=5759 GN=EHI_090400 PE=2 SV=1	1	30.6123	0.0334173	30.612	22.941	30.612					0	0		NaN	0	0		NaN	0	0		NaN	0	0		NaN	1	30.6123	0.0334173	30.612		1	C	GSSQFQTIRKELRGTCEFVMGKNTLIRKAIK	X;X;X;X;X;X;X;X;X;X;X;X;X;X;X;Carbamidomethyl (C);X;X;X;X;X;X;X;X;X;X;X;X;X;X;X	XXXXXXXXXXXXXPPPPPPPPPXXXXXXXXX	GTC(1)EFVMGK	GTC(30.61)EFVMGK	3	2	0.48852	By matching	By matching	By matching	By matching
B1N302;C4LUU9	115;122	B1N302	B1N302	>tr|B1N302|B1N302_ENTHI Peptidylprolyl isomerase OS=Entamoeba histolytica OX=5759 GN=EHI_051870 PE=4 SV=1;>tr|C4LUU9|C4LUU9_ENTHI Peptidylprolyl isomerase OS=Entamoeba histolytica OX=5759 GN=EHI_178850 PE=4 SV=1	1	119.498	1.69808e-10	119.5	108.64	119.5	1	119.498	1.69808e-10	119.5					0	0		NaN					0	0		NaN						2	C	EGFEKGIESMKLNEKCTFTLKPEDAFGSCGD	X;X;X;X;X;X;X;X;X;Oxidation (M);X;X;X;X;X;Carbamidomethyl (C);X;X;X;X;X;X;X;X;X;X;X;X;Carbamidomethyl (C);X;X	XXXXXXXXXXXXXXXPPPPPPPPPPPPPPPP	C(1)TFTLKPEDAFGSC(1)GDKER	C(119.5)TFTLKPEDAFGSC(119.5)GDKER	1	3	-2.5194	By MS/MS	By matching	By matching	By matching
B1N302;C4LUU9	128;135	B1N302	B1N302	>tr|B1N302|B1N302_ENTHI Peptidylprolyl isomerase OS=Entamoeba histolytica OX=5759 GN=EHI_051870 PE=4 SV=1;>tr|C4LUU9|C4LUU9_ENTHI Peptidylprolyl isomerase OS=Entamoeba histolytica OX=5759 GN=EHI_178850 PE=4 SV=1	1	92.237	1.69808e-10	119.5	108.64	95.205	1	102.032	1.69808e-10	119.5					1	92.237	2.22981e-07	107.18					0.999981	47.2268	0.000880156	53.037						1;2	C	EKCTFTLKPEDAFGSCGDKERSIEPNKEITF	X;X;Carbamidomethyl (C);NEM;X;X;X;X;X;X;X;X;X;X;X;X;Carbamidomethyl (C);X;X;X;X;X;X;X;X;X;X;X;X;X;X;X	XXPPPPPPPPPPPPPPPPPPPXXXXXXXXXX	CTFTLKPEDAFGSC(1)GDKER	C(-92.24)TFTLKPEDAFGSC(92.24)GDKER	14	3	-0.28684	By MS/MS	By matching	By MS/MS	By matching
B1N302;C4LUU9	99;106	B1N302	B1N302	>tr|B1N302|B1N302_ENTHI Peptidylprolyl isomerase OS=Entamoeba histolytica OX=5759 GN=EHI_051870 PE=4 SV=1;>tr|C4LUU9|C4LUU9_ENTHI Peptidylprolyl isomerase OS=Entamoeba histolytica OX=5759 GN=EHI_178850 PE=4 SV=1	1	105.191	5.27018e-11	121.24	106.72	105.19	1	93.2284	5.64536e-06	93.228					1	121.239	5.27018e-11	121.24					1	105.191	1.1495e-07	105.19						1	C	EKKDFKFKVGDMPVICEGFEKGIESMKLNEK	X;X;X;X;X;X;X;X;X;X;X;Oxidation (M);X;X;X;Carbamidomethyl (C);X;X;X;X;X;X;X;X;X;Oxidation (M);X;X;X;X;X	XXXXXXXXPPPPPPPPPPPPPXXXXXXXXXX	VGDMPVIC(1)EGFEK	VGDMPVIC(105.19)EGFEK	8	2	-1.5349	By MS/MS	By matching	By MS/MS	By matching
C4M4N3;B1N306;B1N3D6	370;370;370	C4M4N3	C4M4N3	>tr|C4M4N3|C4M4N3_ENTHI Elongation factor 2 OS=Entamoeba histolytica OX=5759 GN=EHI_189490 PE=3 SV=1;>tr|B1N306|B1N306_ENTHI Elongation factor 2 OS=Entamoeba histolytica OX=5759 GN=EHI_166810 PE=3 SV=1;>tr|B1N3D6|B1N3D6_ENTHI Elongation factor 2 OS=Entamoe	1	49.7208	1.88867e-23	163.45	141.78	49.721	1	21.3086	1.88867e-23	163.45	0	0		NaN	1	49.7208	1.84558e-15	142.58	0	0		NaN	1	57.7883	0.000200267	62.94	0	0		NaN		1	C	YTGPMDDEAAKAMANCDEKGPLMMYVSKMIP	X;X;X;X;Oxidation (M);X;X;X;X;X;X;X;Oxidation (M);X;X;Carbamidomethyl (C);X;X;Propionamide_aa;X;X;X;X;X;X;X;X;X;Oxidation (M);X;X	XXXXXXXXXXXPPPPPPPPPPPPPPPPPXXX	AMANC(1)DEKGPLMMYVSK	AMANC(49.72)DEKGPLMMYVSK	5	3	0.76976	By MS/MS	By matching	By MS/MS	By matching
C4M4N3;B1N306;B1N3D6	774;807;774	C4M4N3	C4M4N3	>tr|C4M4N3|C4M4N3_ENTHI Elongation factor 2 OS=Entamoeba histolytica OX=5759 GN=EHI_189490 PE=3 SV=1;>tr|B1N306|B1N306_ENTHI Elongation factor 2 OS=Entamoeba histolytica OX=5759 GN=EHI_166810 PE=3 SV=1;>tr|B1N3D6|B1N3D6_ENTHI Elongation factor 2 OS=Entamoe	1	155.572	6.49708e-17	155.57	121.57	155.57	1	138.282	1.95122e-15	138.28					1	134.374	3.24176e-15	134.37	1	101.009	1.17776e-06	101.01	1	155.572	6.49708e-17	155.57	0	0		NaN		1	C	RPGTPLFNVRAYLPVCESFGFTADLRSHTSG	X;X;X;X;X;X;X;X;X;X;X;X;X;X;X;Carbamidomethyl (C);X;X;X;X;X;X;X;X;X;X;X;X;X;X;X	XXXXXXXXXXPPPPPPPPPPPPPPPPXXXXX	AYLPVC(1)ESFGFTADLR	AYLPVC(155.57)ESFGFTADLR	6	2	-0.012691	By MS/MS	By matching	By MS/MS	By MS/MS
C4M4N3;B1N306;B1N3D6	548;548;548	C4M4N3	C4M4N3	>tr|C4M4N3|C4M4N3_ENTHI Elongation factor 2 OS=Entamoeba histolytica OX=5759 GN=EHI_189490 PE=3 SV=1;>tr|B1N306|B1N306_ENTHI Elongation factor 2 OS=Entamoeba histolytica OX=5759 GN=EHI_166810 PE=3 SV=1;>tr|B1N3D6|B1N3D6_ENTHI Elongation factor 2 OS=Entamoe	1	128.881	7.47692e-47	215.79	206.93	128.88	1	153.145	5.45797e-37	183.07	0	0		NaN	1	149.708	7.47692e-47	215.79	1	159.588	6.46261e-32	159.59	1	128.881	9.19128e-37	179.5	1	158.907	6.7809e-32	158.91		1	C	ELHLEVCLKDLQEDYCSGVPLIVTEPVVSFR	X;X;X;X;X;X;X;X;X;X;X;X;X;X;X;Carbamidomethyl (C);X;X;X;X;X;X;X;X;X;X;X;X;X;X;X	XXXXXXXXXPPPPPPPPPPPPPPPPPPPPPP	DLQEDYC(1)SGVPLIVTEPVVSFR	DLQEDYC(128.88)SGVPLIVTEPVVSFR	7	3	0.59001	By MS/MS	By matching	By MS/MS	By MS/MS
C4M4N3;B1N306;B1N3D6	676;676;676	C4M4N3	C4M4N3	>tr|C4M4N3|C4M4N3_ENTHI Elongation factor 2 OS=Entamoeba histolytica OX=5759 GN=EHI_189490 PE=3 SV=1;>tr|B1N306|B1N306_ENTHI Elongation factor 2 OS=Entamoeba histolytica OX=5759 GN=EHI_166810 PE=3 SV=1;>tr|B1N3D6|B1N3D6_ENTHI Elongation factor 2 OS=Entamoe	1	266.571	3.47466e-115	266.57	251.27	266.57	1	238.983	4.07447e-93	238.98					1	266.571	3.47466e-115	266.57					1	67.1095	1.26219e-05	67.11						1	C	SIVNGFNNAMHDGVVCNEQIRGVRINLEDVK	X;X;X;X;X;X;X;X;X;Oxidation (M);X;X;X;X;X;Carbamidomethyl (C);X;X;X;X;X;X;X;X;X;X;X;X;X;X;X	PPPPPPPPPPPPPPPPPPPPPXXXXXXXXXX	GIQYLNEVKDSIVNGFNNAMHDGVVC(1)NEQIR	GIQYLNEVKDSIVNGFNNAMHDGVVC(266.57)NEQIR	26	3	-0.044849	By MS/MS	By matching	By MS/MS	By matching
C4M4N3;B1N306;B1N3D6	574;574;574	C4M4N3	C4M4N3	>tr|C4M4N3|C4M4N3_ENTHI Elongation factor 2 OS=Entamoeba histolytica OX=5759 GN=EHI_189490 PE=3 SV=1;>tr|B1N306|B1N306_ENTHI Elongation factor 2 OS=Entamoeba histolytica OX=5759 GN=EHI_166810 PE=3 SV=1;>tr|B1N3D6|B1N3D6_ENTHI Elongation factor 2 OS=Entamoe	1	124.119	1.14539e-10	128.54	101.06	124.12	1	124.119	1.14539e-10	128.54	0	0		NaN	1	78.2874	6.73903e-05	94.122	1	79.492	0.000468819	79.492	1	61.4227	0.000263985	65.219	1	61.235	0.00464434	61.235		1	C	VVSFRETITEPSRIQCLSKSANNQNRLFMRA	X;X;X;X;X;X;X;X;X;X;X;X;X;X;X;Carbamidomethyl (C);X;X;NEM H2O;X;X;X;X;X;X;X;X;X;X;X;X	XXXXXPPPPPPPPPPPPPPPPPPPPPXXXXX	IQC(1)LSKSANNQNR	IQC(124.12)LSKSANNQNR	3	2	0.80245	By MS/MS	By matching	By MS/MS	By MS/MS
C4M4N3;B1N306;B1N3D6	275;275;275	C4M4N3	C4M4N3	>tr|C4M4N3|C4M4N3_ENTHI Elongation factor 2 OS=Entamoeba histolytica OX=5759 GN=EHI_189490 PE=3 SV=1;>tr|B1N306|B1N306_ENTHI Elongation factor 2 OS=Entamoeba histolytica OX=5759 GN=EHI_166810 PE=3 SV=1;>tr|B1N3D6|B1N3D6_ENTHI Elongation factor 2 OS=Entamoe	1	127.174	1.03062e-07	127.17	110.5	127.17	0	0		NaN	1	64.1212	0.000562149	64.121	0	0		NaN	1	103.439	5.92938e-07	103.44	1	127.174	1.03062e-07	127.17	1	106.258	1.48888e-07	106.26		1	C	KGDHGEVLQRGFVQFCFDPITKLFNAIMEGR	NEM H2O;X;X;X;X;X;X;X;X;X;X;X;X;X;X;Carbamidomethyl (C);X;X;X;X;X;X;X;X;X;X;X;Oxidation (M);X;X;X	XXXXXXXXXXPPPPPPPPPPPPXXXXXXXXX	GFVQFC(1)FDPITK	GFVQFC(127.17)FDPITK	6	2	-0.63539	By matching	By MS/MS	By matching	By MS/MS
C4M4N3;B1N306;B1N3D6	707;740;707	C4M4N3	C4M4N3	>tr|C4M4N3|C4M4N3_ENTHI Elongation factor 2 OS=Entamoeba histolytica OX=5759 GN=EHI_189490 PE=3 SV=1;>tr|B1N306|B1N306_ENTHI Elongation factor 2 OS=Entamoeba histolytica OX=5759 GN=EHI_166810 PE=3 SV=1;>tr|B1N3D6|B1N3D6_ENTHI Elongation factor 2 OS=Entamoe	1	26.6929	0.000130624	83.647	59.675	26.693	1	74.1727	0.000318717	74.173	1	55.4614	0.00132887	55.461	1	78.2638	0.000237497	78.264	1	62.4631	0.000867647	62.463	1	26.6929	0.000130624	83.647	1	46.8189	0.00105673	56.013		1	C	LHADAIHRGGAQMIPCARRCCFACVLTGAPS	X;X;X;X;X;X;X;X;X;X;X;X;Oxidation (M);X;X;Carbamidomethyl (C);X;X;X;X;X;X;X;X;X;X;X;X;X;X;X	XXXXXXXXPPPPPPPPPPXXXXXXXXXXXXX	GGAQMIPC(1)AR	GGAQMIPC(26.69)AR	8	1	-1.657	By MS/MS	By MS/MS	By MS/MS	By MS/MS
C4M4N3;B1N306;B1N3D6	412;412;412	C4M4N3	C4M4N3	>tr|C4M4N3|C4M4N3_ENTHI Elongation factor 2 OS=Entamoeba histolytica OX=5759 GN=EHI_189490 PE=3 SV=1;>tr|B1N306|B1N306_ENTHI Elongation factor 2 OS=Entamoeba histolytica OX=5759 GN=EHI_166810 PE=3 SV=1;>tr|B1N3D6|B1N3D6_ENTHI Elongation factor 2 OS=Entamoe	1	77.1914	1.18086e-05	101.78	89.865	77.191	1	39.91	7.26651e-05	97.352	1	31.1148	0.00356028	47.228	1	101.783	1.18086e-05	101.78	1	40.5469	0.00154336	53.124	1	77.1914	7.2004e-05	84.375	1	39.7532	0.00200908	51.762		1;2	C	RVFSGTIRTGGKARICGPNYVPGKKDDCVIK	X;X;X;X;X;X;X;X;X;X;X;X;X;X;X;Carbamidomethyl (C);X;X;X;X;X;X;X;X;X;X;X;Carbamidomethyl (C);NEM;NEM H2O;X;X;X	XXXXXXXXXXXXXXPPPPPPPPPPPPPPPPP	IC(1)GPNYVPGKKDDC(1)VIK	IC(77.19)GPNYVPGKKDDC(77.19)VIK	2	2	-0.75006	By MS/MS	By MS/MS	By MS/MS	By MS/MS
C4M4N3;B1N306;B1N3D6	424;424;424	C4M4N3	C4M4N3	>tr|C4M4N3|C4M4N3_ENTHI Elongation factor 2 OS=Entamoeba histolytica OX=5759 GN=EHI_189490 PE=3 SV=1;>tr|B1N306|B1N306_ENTHI Elongation factor 2 OS=Entamoeba histolytica OX=5759 GN=EHI_166810 PE=3 SV=1;>tr|B1N3D6|B1N3D6_ENTHI Elongation factor 2 OS=Entamoe	1	55.5305	1.18086e-05	105.25	49.347	55.531	1	105.249	7.26651e-05	105.25	1	31.1148	0.0177932	31.115	1	84.4978	1.18086e-05	101.78	1	40.5469	0.00316154	40.547	1	55.5305	7.2004e-05	84.375	1	67.1694	0.00332059	67.169		1;2	C	ARICGPNYVPGKKDDCVIKNIQRTMLMMGRY	X;X;X;Carbamidomethyl (C);NEM;NEM H2O;X;X;X;X;X;X;X;X;X;X;X;Carbamidomethyl (C);X;X;X;X;X;X;X;X;Oxidation (M);X;Oxidation (M);Oxidation (M);X;X;X	XXPPPPPPPPPPPPPPPPPXXXXXXXXXXXX	KDDC(1)VIK	KDDC(55.53)VIK	4	2	0.21629	By MS/MS	By MS/MS	By MS/MS	By MS/MS
C4M4N3;B1N306;B1N3D6	634;634;634	C4M4N3	C4M4N3	>tr|C4M4N3|C4M4N3_ENTHI Elongation factor 2 OS=Entamoeba histolytica OX=5759 GN=EHI_189490 PE=3 SV=1;>tr|B1N306|B1N306_ENTHI Elongation factor 2 OS=Entamoeba histolytica OX=5759 GN=EHI_166810 PE=3 SV=1;>tr|B1N3D6|B1N3D6_ENTHI Elongation factor 2 OS=Entamoe	1	158.374	5.37811e-24	158.37	135.44	158.37	1	88.11	2.91757e-15	130.02					1	158.374	5.37811e-24	158.37					0.605034	1.8522	7.15221e-06	89.507						1;2	C	SEKYGWDVDEARKIWCFGPDNCGPNLFVDVT	X;X;NEM H2O;X;X;X;X;X;X;X;X;X;X;X;X;Carbamidomethyl (C);X;X;X;X;X;Carbamidomethyl (C);NEM;NEM H2O;X;X;X;X;X;X;X;X;X	XXXXXXXXXXXXPPPPPPPPPPPPPPPPPPP	KIWC(1)FGPDNC(1)GPNLFVDVTK	KIWC(158.37)FGPDNC(158.37)GPNLFVDVTK	4	2	-1.4384	By MS/MS	By matching	By MS/MS	By matching
C4M4N3;B1N306;B1N3D6	640;640;640	C4M4N3	C4M4N3	>tr|C4M4N3|C4M4N3_ENTHI Elongation factor 2 OS=Entamoeba histolytica OX=5759 GN=EHI_189490 PE=3 SV=1;>tr|B1N306|B1N306_ENTHI Elongation factor 2 OS=Entamoeba histolytica OX=5759 GN=EHI_166810 PE=3 SV=1;>tr|B1N3D6|B1N3D6_ENTHI Elongation factor 2 OS=Entamoe	1	158.374	5.37811e-24	158.37	135.44	158.37	0.907489	9.91649	0.0259286	22.904					1	158.374	5.37811e-24	158.37					0	0		NaN						1;2	C	DVDEARKIWCFGPDNCGPNLFVDVTKGIQYL	X;X;X;X;X;X;X;X;X;Carbamidomethyl (C);NEM;X;X;X;X;X;Carbamidomethyl (C);X;X;X;X;X;X;X;X;X;X;X;X;X;X;X	XXXXXXPPPPPPPPPPPPPPPPPPPPXXXXX	KIWC(1)FGPDNC(1)GPNLFVDVTK	KIWC(158.37)FGPDNC(158.37)GPNLFVDVTK	10	2	-1.4384	By MS/MS	By matching	By MS/MS	By matching
C4M4N3;B1N306;B1N3D6	23;23;23	C4M4N3	C4M4N3	>tr|C4M4N3|C4M4N3_ENTHI Elongation factor 2 OS=Entamoeba histolytica OX=5759 GN=EHI_189490 PE=3 SV=1;>tr|B1N306|B1N306_ENTHI Elongation factor 2 OS=Entamoeba histolytica OX=5759 GN=EHI_166810 PE=3 SV=1;>tr|B1N3D6|B1N3D6_ENTHI Elongation factor 2 OS=Entamoe	1	46.0691	7.13512e-07	101.3	83.569	46.069	1	46.0691	2.81171e-05	86.803					1	30.0228	7.13512e-07	101.3	0	0		NaN	1	40.4755	3.82202e-05	85.402	0	0		NaN		1	C	TMKDFMLNKSNIRNMCVIAHVDHGKSTLTDS	X;Oxidation (M);NEM H2O;X;X;Oxidation (M);X;X;X;X;X;X;X;X;Oxidation (M);Carbamidomethyl (C);X;X;X;X;X;X;X;X;NEM H2O;X;X;X;X;X;X	XXXXXXXXXXXXXPPPPPPPPPPPPXXXXXX	NMC(1)VIAHVDHGK	NMC(46.07)VIAHVDHGK	3	2	1.9608	By MS/MS	By matching	By MS/MS	By matching
C4M4N3;B1N306;B1N3D6	795;828;795	C4M4N3	C4M4N3	>tr|C4M4N3|C4M4N3_ENTHI Elongation factor 2 OS=Entamoeba histolytica OX=5759 GN=EHI_189490 PE=3 SV=1;>tr|B1N306|B1N306_ENTHI Elongation factor 2 OS=Entamoeba histolytica OX=5759 GN=EHI_166810 PE=3 SV=1;>tr|B1N3D6|B1N3D6_ENTHI Elongation factor 2 OS=Entamoe	1	64.2135	1.04086e-06	64.213	50.768	64.213	1	64.2135	1.04086e-06	64.213																						1	C	TADLRSHTSGQAFPQCVFDHWQLLNGDVTDA	X;X;X;X;X;X;X;X;X;X;X;X;X;X;X;Carbamidomethyl (C);X;X;X;X;X;X;X;X;X;X;X;X;X;X;X	XXXXXPPPPPPPPPPPPPPPPPPPPPPPPPP	SHTSGQAFPQC(1)VFDHWQLLNGDVTDATSK	SHTSGQAFPQC(64.21)VFDHWQLLNGDVTDATSK	11	4	-1.3953	By MS/MS	By matching	By matching	By matching
C4M4N3;B1N306;B1N3D6	177;177;177	C4M4N3	C4M4N3	>tr|C4M4N3|C4M4N3_ENTHI Elongation factor 2 OS=Entamoeba histolytica OX=5759 GN=EHI_189490 PE=3 SV=1;>tr|B1N306|B1N306_ENTHI Elongation factor 2 OS=Entamoeba histolytica OX=5759 GN=EHI_166810 PE=3 SV=1;>tr|B1N3D6|B1N3D6_ENTHI Elongation factor 2 OS=Entamoe	1	275.371	1.37918e-77	275.37	250.89	275.37	1	91.4144	1.6303e-30	198.96					1	204.23	7.95622e-36	204.23	1	48.907	8.8038e-07	99.392	1	275.371	1.37918e-77	275.37	1	105.06	5.37649e-07	105.06		1	C	ILELKEEPEEAYQSFCRSIENVNVLISTYKD	X;X;X;X;X;X;X;X;X;X;X;X;X;X;X;Carbamidomethyl (C);X;X;X;X;X;X;X;X;X;X;X;X;X;X;X	PPPPPPPPPPPPPPPPPXXXXXXXXXXXXXX	VILELKEEPEEAYQSFC(1)R	VILELKEEPEEAYQSFC(275.37)R	17	2	0.17457	By MS/MS	By matching	By MS/MS	By MS/MS
C4M4N3;B1N306;B1N3D6	129;129;129	C4M4N3	C4M4N3	>tr|C4M4N3|C4M4N3_ENTHI Elongation factor 2 OS=Entamoeba histolytica OX=5759 GN=EHI_189490 PE=3 SV=1;>tr|B1N306|B1N306_ENTHI Elongation factor 2 OS=Entamoeba histolytica OX=5759 GN=EHI_166810 PE=3 SV=1;>tr|B1N3D6|B1N3D6_ENTHI Elongation factor 2 OS=Entamoe	1	75.8681	1.73492e-43	186.92	168.61	75.868	0	0		NaN					1	36.504	1.73492e-43	186.92					1	75.8681	1.63568e-06	75.868						1;2	C	TAALRVTDGALVVVDCVEGVCVQTETVLRQA	X;X;X;X;X;X;X;X;X;X;X;X;X;X;X;Carbamidomethyl (C);X;X;X;X;Carbamidomethyl (C);NEM;X;X;X;X;X;X;X;X;X;X	XXXXXPPPPPPPPPPPPPPPPPPPPPPPPXX	VTDGALVVVDC(1)VEGVC(1)VQTETVLR	VTDGALVVVDC(75.87)VEGVC(75.87)VQTETVLR	11	3	-0.77793	By matching	By matching	By MS/MS	By matching
C4M4N3;B1N306;B1N3D6	134;134;134	C4M4N3	C4M4N3	>tr|C4M4N3|C4M4N3_ENTHI Elongation factor 2 OS=Entamoeba histolytica OX=5759 GN=EHI_189490 PE=3 SV=1;>tr|B1N306|B1N306_ENTHI Elongation factor 2 OS=Entamoeba histolytica OX=5759 GN=EHI_166810 PE=3 SV=1;>tr|B1N3D6|B1N3D6_ENTHI Elongation factor 2 OS=Entamoe	1	75.8681	1.73492e-43	186.92	168.61	75.868	0	0		NaN					1	36.504	1.73492e-43	186.92					1	75.8681	3.93739e-07	82.177						1;2	C	VTDGALVVVDCVEGVCVQTETVLRQALTERV	X;X;X;X;X;X;X;X;X;X;Carbamidomethyl (C);NEM;X;X;X;X;Carbamidomethyl (C);X;X;X;X;X;X;X;X;X;X;X;X;X;X;X	PPPPPPPPPPPPPPPPPPPPPPPPXXXXXXX	VTDGALVVVDC(1)VEGVC(1)VQTETVLR	VTDGALVVVDC(75.87)VEGVC(75.87)VQTETVLR	16	3	-0.77793	By matching	By matching	By MS/MS	By matching
C4M4N3;B1N306;B1N3D6	446;446;446	C4M4N3	C4M4N3	>tr|C4M4N3|C4M4N3_ENTHI Elongation factor 2 OS=Entamoeba histolytica OX=5759 GN=EHI_189490 PE=3 SV=1;>tr|B1N306|B1N306_ENTHI Elongation factor 2 OS=Entamoeba histolytica OX=5759 GN=EHI_166810 PE=3 SV=1;>tr|B1N3D6|B1N3D6_ENTHI Elongation factor 2 OS=Entamoe	1	87.5109	7.77033e-55	208.17	195.72	87.511	1	132.36	7.77033e-55	208.17	0	0		NaN	1	99.8384	3.32379e-34	171.05	1	127.299	1.92372e-15	127.3	1	87.5109	1.06744e-50	202.64	1	49.1758	0.000255899	49.176		1;2	C	RTMLMMGRYTDPIDECPCGNVIGLVGVDQYL	X;X;Oxidation (M);X;Oxidation (M);Oxidation (M);X;X;X;X;X;X;X;X;X;Carbamidomethyl (C);X;Carbamidomethyl (C);NEM H2O;X;X;X;X;X;X;X;X;X;X;X;X;X	XXXXXXXXPPPPPPPPPPPPPPPPPPPPPPP	YTDPIDEC(1)PC(1)GNVIGLVGVDQYLLK	YTDPIDEC(87.51)PC(87.51)GNVIGLVGVDQYLLK	8	3	-2.2331	By MS/MS	By matching	By MS/MS	By MS/MS
C4M4N3;B1N306;B1N3D6	448;448;448	C4M4N3	C4M4N3	>tr|C4M4N3|C4M4N3_ENTHI Elongation factor 2 OS=Entamoeba histolytica OX=5759 GN=EHI_189490 PE=3 SV=1;>tr|B1N306|B1N306_ENTHI Elongation factor 2 OS=Entamoeba histolytica OX=5759 GN=EHI_166810 PE=3 SV=1;>tr|B1N3D6|B1N3D6_ENTHI Elongation factor 2 OS=Entamoe	1	87.5109	9.30293e-63	231.44	220.53	87.511	1	132.36	1.17366e-55	216.87	0	0		NaN	1	99.8384	9.30293e-63	231.44	1	127.299	1.92372e-15	127.3	1	87.5109	1.06744e-50	202.64	1	49.1758	1.53842e-05	61.612		1;2	C	MLMMGRYTDPIDECPCGNVIGLVGVDQYLLK	Oxidation (M);X;Oxidation (M);Oxidation (M);X;X;X;X;X;X;X;X;X;Carbamidomethyl (C);NEM;NEM H2O;X;Carbamidomethyl (C);X;X;X;X;X;X;X;X;X;X;X;X;X;X;X	XXXXXXPPPPPPPPPPPPPPPPPPPPPPPPP	YTDPIDEC(1)PC(1)GNVIGLVGVDQYLLK	YTDPIDEC(87.51)PC(87.51)GNVIGLVGVDQYLLK	10	3	-2.2331	By MS/MS	By matching	By MS/MS	By MS/MS
C4M4N3;B1N306;B1N3D6	67;67;67	C4M4N3	C4M4N3	>tr|C4M4N3|C4M4N3_ENTHI Elongation factor 2 OS=Entamoeba histolytica OX=5759 GN=EHI_189490 PE=3 SV=1;>tr|B1N306|B1N306_ENTHI Elongation factor 2 OS=Entamoeba histolytica OX=5759 GN=EHI_166810 PE=3 SV=1;>tr|B1N3D6|B1N3D6_ENTHI Elongation factor 2 OS=Entamoe	1	56.3391	0.000160676	71.545	42.19	56.339	0	0		NaN					1	41.695	0.000160676	71.545					1	56.3391	0.000760853	56.339						1	C	GVARYTDTRPDEQERCITIKSTSISMYYEIE	X;X;X;X;X;X;X;X;X;X;X;X;X;X;X;Carbamidomethyl (C);X;X;X;X;X;X;X;X;X;X;X;X;X;X;X	XXXXPPPPPPPPPPPPPPPPXXXXXXXXXXX	YTDTRPDEQERC(1)ITIK	YTDTRPDEQERC(56.34)ITIK	12	3	-0.2508	By matching	By matching	By MS/MS	By matching
B1N309;C4M1Y2	302;302	B1N309;C4M1Y2	B1N309	>tr|B1N309|B1N309_ENTHI Rab GDP dissociation inhibitor OS=Entamoeba histolytica OX=5759 GN=EHI_167060 PE=2 SV=1;>tr|C4M1Y2|C4M1Y2_ENTHI Rab GDP dissociation inhibitor OS=Entamoeba histolytica OX=5759 GN=EHI_164890 PE=3 SV=1	1	82.8854	6.23225e-08	82.885	69.987	82.885	1	47.3706	0.000332553	47.371									1	57.2379	2.53635e-05	57.238	1	82.8854	6.23225e-08	82.885	1	36.9353	0.000551264	42.384		2	C	FPDKVKKVGQVIRAICILNHPVANTDNAESC	X;X;X;X;X;X;X;X;X;X;X;X;X;X;X;Carbamidomethyl (C);X;X;X;X;X;X;X;X;X;X;X;X;X;X;Carbamidomethyl (C)	XXXXXXXXXXXXXPPPPPPPPPPPPPPPPPP	AIC(1)ILNHPVANTDNAESC(1)QIIMPQK	AIC(82.89)ILNHPVANTDNAESC(82.89)QIIMPQK	3	3	0.3674	By MS/MS	By matching	By matching	By MS/MS
B1N309;C4M1Y2	317;317	B1N309;C4M1Y2	B1N309	>tr|B1N309|B1N309_ENTHI Rab GDP dissociation inhibitor OS=Entamoeba histolytica OX=5759 GN=EHI_167060 PE=2 SV=1;>tr|C4M1Y2|C4M1Y2_ENTHI Rab GDP dissociation inhibitor OS=Entamoeba histolytica OX=5759 GN=EHI_164890 PE=3 SV=1	1	82.8854	6.23225e-08	82.885	69.987	82.885	1	47.3706	0.000332553	47.371									1	57.2379	2.53635e-05	57.238	1	82.8854	6.23225e-08	82.885	1	36.9353	0.000551264	42.384		2	C	CILNHPVANTDNAESCQIIMPQKQVGRKSDI	Carbamidomethyl (C);X;X;X;X;X;X;X;X;X;X;X;X;X;X;Carbamidomethyl (C);X;X;X;Oxidation (M);X;X;X;X;X;X;X;X;X;X;X	PPPPPPPPPPPPPPPPPPPPPPPXXXXXXXX	AIC(1)ILNHPVANTDNAESC(1)QIIMPQK	AIC(82.89)ILNHPVANTDNAESC(82.89)QIIMPQK	18	3	0.3674	By MS/MS	By matching	By matching	By MS/MS
B1N309;C4M1Y2	277;277	B1N309;C4M1Y2	B1N309	>tr|B1N309|B1N309_ENTHI Rab GDP dissociation inhibitor OS=Entamoeba histolytica OX=5759 GN=EHI_167060 PE=2 SV=1;>tr|C4M1Y2|C4M1Y2_ENTHI Rab GDP dissociation inhibitor OS=Entamoeba histolytica OX=5759 GN=EHI_164890 PE=3 SV=1	1	39.9819	0.000308539	65.374	54.116	39.982					1	32.746	0.000641465	57.288					1	39.9819	0.00341937	39.982					1	65.3744	0.000308539	65.374		1	C	GRVAGVKFESGEVAKCSNIIADPSYFPDKVK	X;X;X;X;X;X;X;X;X;X;X;X;X;X;X;Carbamidomethyl (C);NEM;X;X;X;X;X;X;X;X;X;X;X;X;X;X;X	XXXXXXXXXXXXXXXPPPPPPPPPPPPPPPP	C(1)SNIIADPSYFPDKVK	C(39.98)SNIIADPSYFPDKVK	1	3	-0.098656	By matching	By MS/MS	By matching	By MS/MS
B1N309;C4M1Y2	344;344	B1N309;C4M1Y2	B1N309	>tr|B1N309|B1N309_ENTHI Rab GDP dissociation inhibitor OS=Entamoeba histolytica OX=5759 GN=EHI_167060 PE=2 SV=1;>tr|C4M1Y2|C4M1Y2_ENTHI Rab GDP dissociation inhibitor OS=Entamoeba histolytica OX=5759 GN=EHI_164890 PE=3 SV=1	1	61.9621	6.65108e-07	102.08	81.646	61.962	1	81.5099	3.31095e-05	81.51	1	50.3923	0.000962992	50.392	1	91.4006	1.53763e-05	91.401	1	66.8264	6.65108e-07	102.08	1	101.055	7.22821e-07	101.05	1	61.9621	0.00017795	62.658		1	C	KSDIYISVLSGNNQVCPKGKYIAIVGTTVET	X;X;X;X;X;X;X;X;X;X;X;X;X;X;X;Carbamidomethyl (C);X;X;X;X;X;X;X;X;X;X;X;X;X;X;X	PPPPPPPPPPPPPPPPPPXXXXXXXXXXXXX	SDIYISVLSGNNQVC(1)PK	SDIYISVLSGNNQVC(61.96)PK	15	2	-0.88861	By MS/MS	By MS/MS	By MS/MS	By MS/MS
B1N336;C4LYF4;B1N418	41;41;23	B1N336	B1N336	>tr|B1N336|B1N336_ENTHI 40S ribosomal protein S4, putative OS=Entamoeba histolytica OX=5759 GN=EHI_118170 PE=3 SV=1;>tr|C4LYF4|C4LYF4_ENTHI 40S ribosomal protein S4, putative OS=Entamoeba histolytica OX=5759 GN=EHI_003940 PE=2 SV=1;>tr|B1N418|B1N418_ENTHI	1	56.6322	0.00452147	56.632	40.434	56.632	0	0		NaN					1	56.6322	0.00452147	56.632					0	0		NaN	0	0		NaN			C	TFAPKPSHGPHGMKECLPLILILRNRLNYAL	X;X;X;X;X;X;X;X;X;X;X;X;X;X;X;Carbamidomethyl (C);X;X;X;X;X;X;X;X;X;X;X;X;X;X;X	XXXXXXXXXXXXXXPPPPPPPPPPXXXXXXX	EC(1)LPLILILR	EC(56.63)LPLILILR	2	2	-0.66618	By matching	By matching	By matching	By matching
B1N336;C4LYF4;B1N418	110;110;92	B1N336	B1N336	>tr|B1N336|B1N336_ENTHI 40S ribosomal protein S4, putative OS=Entamoeba histolytica OX=5759 GN=EHI_118170 PE=3 SV=1;>tr|C4LYF4|C4LYF4_ENTHI 40S ribosomal protein S4, putative OS=Entamoeba histolytica OX=5759 GN=EHI_003940 PE=2 SV=1;>tr|B1N418|B1N418_ENTHI	1	53.8685	0.000152141	74.698	53.726	53.869	1	53.8685	0.000152141	74.698	1	63.4729	0.000826918	63.473	1	68.5634	0.000266213	68.563									1	53.0339	0.00174326	53.034		1	C	TKENFRLMYNTKRRFCLVPLTAEQAKRVLGT	X;X;X;X;X;X;X;X;X;X;X;X;X;X;X;Carbamidomethyl (C);X;X;X;X;X;X;X;X;X;X;X;X;X;X;X	XXXXXXXXXXXXXPPPPPPPPPPPPPXXXXX	RFC(1)LVPLTAEQAK	RFC(53.87)LVPLTAEQAK	3	3	3.4279	By MS/MS	By MS/MS	By MS/MS	By matching
B1N341;B1N422	443;281	B1N341	B1N341	>tr|B1N341|B1N341_ENTHI Cortexillin, putative OS=Entamoeba histolytica OX=5759 GN=EHI_104560 PE=4 SV=1;>tr|B1N422|B1N422_ENTHI Uncharacterized protein OS=Entamoeba histolytica OX=5759 GN=EHI_083140 PE=4 SV=1	1	73.1376	5.53954e-05	73.138	59.392	73.138	1	66.6061	0.000219774	66.606	0	0		NaN	1	40.9677	0.00514625	40.968	1	29.5822	0.0193698	29.582	1	73.1376	5.53954e-05	73.138	1	39.2442	0.00349811	39.244		1	C	EVSVLKKTVQTAQDDCDEDKKDLEKAGELQK	X;X;X;X;X;X;X;X;X;X;X;X;X;X;X;Carbamidomethyl (C);X;X;X;X;X;X;X;X;X;X;X;X;X;X;X	XXXXXXXPPPPPPPPPPPPPPPPPPXXXXXX	TVQTAQDDC(1)DEDKKDLEK	TVQTAQDDC(73.14)DEDKKDLEK	9	3	0.96442	By MS/MS	By matching	By MS/MS	By MS/MS
B1N355;Q1EQ16	235;228	B1N355	B1N355	>tr|B1N355|B1N355_ENTHI AP-2 complex subunit mu, putative OS=Entamoeba histolytica OX=5759 GN=EHI_124560 PE=2 SV=1;>tr|Q1EQ16|Q1EQ16_ENTHI Clathrin coat assembly protein, putative OS=Entamoeba histolytica OX=5759 GN=EHI_135430 PE=3 SV=1	1	40.2776	0.00397366	40.278	28.22	40.278					0	0		NaN	0	0		NaN	1	27.5795	0.0262194	27.58					1	40.2776	0.00397366	40.278		1	C	AQKKSIQLADVTFHQCVRLTRFDQDRSINFI	X;X;X;X;X;X;X;X;X;X;X;X;X;X;X;Carbamidomethyl (C);X;X;X;X;X;X;X;X;X;X;X;X;X;X;X	XXXXPPPPPPPPPPPPPPXXXXXXXXXXXXX	SIQLADVTFHQC(1)VR	SIQLADVTFHQC(40.28)VR	12	3	0.97137	By matching	By matching	By matching	By MS/MS
B1N366	65	B1N366	B1N366	>tr|B1N366|B1N366_ENTHI Pore-forming peptide ameobapore B, putative OS=Entamoeba histolytica OX=5759 GN=EHI_194540 PE=4 SV=1	1	29.805	7.57204e-05	84.479	61.46	29.805	0	0		NaN	0	0		NaN	1	29.805	0.0439542	29.805	0	0		NaN	0	0		NaN	1	84.4793	7.57204e-05	84.479		1	C	IDNLCGKASGFLGTLCEKILSFGVDELVKLI	X;X;X;X;Carbamidomethyl (C);X;X;X;X;X;X;X;X;X;X;Carbamidomethyl (C);X;X;X;X;X;X;X;X;X;X;X;X;X;X;X	XXXXXXXPPPPPPPPPPPXXXXXXXXXXXXX	ASGFLGTLC(1)EK	ASGFLGTLC(29.8)EK	9	2	0.87942	By matching	By matching	By matching	By matching
B1N366	90	B1N366	B1N366	>tr|B1N366|B1N366_ENTHI Pore-forming peptide ameobapore B, putative OS=Entamoeba histolytica OX=5759 GN=EHI_194540 PE=4 SV=1	1	68.0444	0.000171405	68.044	53.253	68.044	0	0		NaN	0	0		NaN	0	0		NaN	0	0		NaN	0	0		NaN	1	68.0444	0.000171405	68.044		1	C	ELVKLIENHVDPVVVCEKIHAC_________	X;X;X;X;X;X;X;X;X;X;X;X;X;X;X;Carbamidomethyl (C);X;X;X;X;X;X;X;X;X;X;X;X;X;X;X	XXXXPPPPPPPPPPPPPPXXXXXXXXXXXXX	LIENHVDPVVVC(1)EK	LIENHVDPVVVC(68.04)EK	12	3	0.80497	By matching	By matching	By matching	By matching
B1N366	54	B1N366	B1N366	>tr|B1N366|B1N366_ENTHI Pore-forming peptide ameobapore B, putative OS=Entamoeba histolytica OX=5759 GN=EHI_194540 PE=4 SV=1	1	40.9939	0.0101634	40.994	32.3	40.994					0	0		NaN					0	0		NaN	0	0		NaN	1	40.9939	0.0101634	40.994		1	C	TVDGAQAVRQYIDNLCGKASGFLGTLCEKIL	X;X;X;X;X;X;X;X;X;X;X;X;X;X;X;Carbamidomethyl (C);X;X;X;X;X;X;X;X;X;X;Carbamidomethyl (C);X;X;X;X	XXXXXXXXXPPPPPPPPPXXXXXXXXXXXXX	QYIDNLC(1)GK	QYIDNLC(40.99)GK	7	2	1.0644	By matching	By matching	By matching	By matching
B1N387;C4M230;C4M2R2	231;231;231	B1N387;C4M230;C4M2R2	C4M230	>tr|B1N387|B1N387_ENTHI Aldehyde-alcohol dehydrogenase 2, putative OS=Entamoeba histolytica OX=5759 GN=EHI_024240 PE=4 SV=1;>tr|C4M230|C4M230_ENTHI Aldehyde-alcohol dehydrogenase OS=Entamoeba histolytica OX=5759 GN=EHI_150490 PE=3 SV=1;>tr|C4M2R2|C4M2R2_EN	1	27.1255	1.01694e-15	147.17	114.24	27.125	1	147.169	1.01694e-15	147.17	1	31.0889	0.0205361	31.089	1	106.597	2.5298e-07	106.6	1	30.7342	0.0063691	30.734	1	27.1255	1.97676e-06	69.379	1	62.0552	0.00236049	63.682		1	C	LGVGAGNVPTYIEKTCNIKQAANDVVMSKSF	X;X;X;X;X;X;X;X;X;X;X;X;X;NEM H2O;X;Carbamidomethyl (C);NEM H2O;X;X;NEM H2O;X;X;X;X;X;X;X;Oxidation (M);X;X;X;X	PPPPPPPPPPPPPPPPPPPPPPPPPPPPPXX	TC(1)NIKQAANDVVMSK	TC(27.13)NIKQAANDVVMSK	2	3	1.5568	By MS/MS	By MS/MS	By MS/MS	By MS/MS
B1N387	53	B1N387	B1N387	>tr|B1N387|B1N387_ENTHI Aldehyde-alcohol dehydrogenase 2, putative OS=Entamoeba histolytica OX=5759 GN=EHI_024240 PE=4 SV=1	1	110.026	7.83072e-75	261.74	220.65	110.03	1	110.026	3.29879e-74	258.9	1	115.361	1.21277e-12	115.36	1	34.9154	7.83072e-75	261.74	1	45.099	9.60371e-10	103.28	1	24.9571	2.00486e-63	245.41	1	49.8712	2.22677e-09	98.957		1	C	DYIVKKASVAALDQHCALAVAAVEETGRGIF	X;X;X;X;X;NEM H2O;X;X;X;X;X;X;X;X;X;Carbamidomethyl (C);X;X;X;X;X;X;X;X;X;X;X;X;X;X;X	XXXXXPPPPPPPPPPPPPPPPPPPPPPPXXX	KASVAALDQHC(1)ALAVAAVEETGR	KASVAALDQHC(110.03)ALAVAAVEETGR	11	3	2.0254	By MS/MS	By MS/MS	By MS/MS	By MS/MS
B1N387;C4M230;C4M2R2	297;311;311	B1N387;C4M230;C4M2R2	C4M230	>tr|B1N387|B1N387_ENTHI Aldehyde-alcohol dehydrogenase 2, putative OS=Entamoeba histolytica OX=5759 GN=EHI_024240 PE=4 SV=1;>tr|C4M230|C4M230_ENTHI Aldehyde-alcohol dehydrogenase OS=Entamoeba histolytica OX=5759 GN=EHI_150490 PE=3 SV=1;>tr|C4M2R2|C4M2R2_EN	1	97.4687	6.99682e-40	181.51	157.08	97.469	1	78.6507	6.99682e-40	181.51	0	0		NaN	1	39.7953	1.7325e-17	165.45	1	140.218	1.51999e-15	140.22	1	97.4687	1.23872e-16	147.7	1	41.695	4.35068e-11	127.83		1;2;3;4	C	EEEKAKLEKFILNPKCPGMSPQWFAEQVGIK;NAYSADVNNARLNPKCPGMSPQWFAEQVGIK	X;X;X;NEM H2O;X;NEM H2O;X;X;X;X;X;X;X;X;X;Carbamidomethyl (C);X;X;Oxidation (M);X;X;X;X;X;X;X;X;X;X;X;X	XXXXXXXXXXXXXXXPPPPPPPPPPPPPPPP	C(1)PGMSPQWFAEQVGIKVPEDC(1)NIIC(1)AVC(1)K	C(97.47)PGMSPQWFAEQVGIKVPEDC(97.47)NIIC(97.47)AVC(97.47)K	1	3	0.46934	By MS/MS	By matching	By MS/MS	By MS/MS
B1N387;C4M230;C4M2R2	317;331;331	B1N387;C4M230;C4M2R2	C4M230	>tr|B1N387|B1N387_ENTHI Aldehyde-alcohol dehydrogenase 2, putative OS=Entamoeba histolytica OX=5759 GN=EHI_024240 PE=4 SV=1;>tr|C4M230|C4M230_ENTHI Aldehyde-alcohol dehydrogenase OS=Entamoeba histolytica OX=5759 GN=EHI_150490 PE=3 SV=1;>tr|C4M2R2|C4M2R2_EN	1	45.9408	1.05748e-13	165.51	152.32	45.941	1	85.7966	2.62642e-11	143.25	1	105.191	7.66381e-08	105.19	1	45.9408	6.96358e-11	141.54	1	78.0233	4.95397e-12	165.51	1	77.8148	1.05748e-13	150.22	1	81.9275	6.26089e-11	115.12		1;2;3;4	C	PQWFAEQVGIKVPEDCNIICAVCKEVGPNEP	X;X;X;X;X;X;X;X;X;X;X;X;X;X;X;Carbamidomethyl (C);X;X;X;Carbamidomethyl (C);NEM;NEM H2O;X;X;Carbamidomethyl (C);NEM;NEM H2O;X;X;X;X;X;X;X;X	PPPPPPPPPPPPPPPPPPPPPPPPPPPPPPP	VPEDC(1)NIIC(1)AVC(1)KEVGPNEPLTR	VPEDC(45.94)NIIC(45.94)AVC(45.94)KEVGPNEPLTR	5	3	2.7609	By MS/MS	By MS/MS	By MS/MS	By MS/MS
B1N387;C4M230;C4M2R2	321;335;335	B1N387;C4M230;C4M2R2	C4M230	>tr|B1N387|B1N387_ENTHI Aldehyde-alcohol dehydrogenase 2, putative OS=Entamoeba histolytica OX=5759 GN=EHI_024240 PE=4 SV=1;>tr|C4M230|C4M230_ENTHI Aldehyde-alcohol dehydrogenase OS=Entamoeba histolytica OX=5759 GN=EHI_150490 PE=3 SV=1;>tr|C4M2R2|C4M2R2_EN	1	45.9408	2.32076e-20	165.51	152.32	45.941	1	115.119	2.32076e-20	135.81	1	105.191	7.66381e-08	105.19	1	45.9408	2.34593e-11	141.54	1	165.506	4.95397e-12	165.51	1	98.5924	1.05748e-13	162.48	1	97.6896	3.09315e-11	124.51		1;2;3;4	C	AEQVGIKVPEDCNIICAVCKEVGPNEPLTRE	X;X;X;X;X;X;X;X;X;X;X;Carbamidomethyl (C);NEM;NEM H2O;X;X;X;Carbamidomethyl (C);X;X;Carbamidomethyl (C);NEM;NEM H2O;X;X;X;X;X;X;X;X;X;X;X;X	PPPPPPPPPPPPPPPPPPPPPPPPPPPPPPX	VPEDC(1)NIIC(1)AVC(1)KEVGPNEPLTR	VPEDC(45.94)NIIC(45.94)AVC(45.94)KEVGPNEPLTR	9	3	2.7609	By MS/MS	By MS/MS	By MS/MS	By MS/MS
B1N387;C4M230;C4M2R2	324;338;338	B1N387;C4M230;C4M2R2	C4M230	>tr|B1N387|B1N387_ENTHI Aldehyde-alcohol dehydrogenase 2, putative OS=Entamoeba histolytica OX=5759 GN=EHI_024240 PE=4 SV=1;>tr|C4M230|C4M230_ENTHI Aldehyde-alcohol dehydrogenase OS=Entamoeba histolytica OX=5759 GN=EHI_150490 PE=3 SV=1;>tr|C4M2R2|C4M2R2_EN	1	45.9408	6.99682e-40	169.13	161.56	45.941	1	84.5121	6.99682e-40	169.13	1	105.191	7.66381e-08	105.19	1	45.9408	7.41651e-11	141.54	1	165.506	4.95397e-12	165.51	1	98.5924	1.05748e-13	122.64	1	78.0233	1.93323e-11	127.71		1;2;3;4	C	VGIKVPEDCNIICAVCKEVGPNEPLTREKLS	X;X;X;X;X;X;X;X;Carbamidomethyl (C);NEM;NEM H2O;X;X;X;Carbamidomethyl (C);NEM;NEM H2O;X;X;Carbamidomethyl (C);X;X;X;X;X;X;X;X;X;X;X;X;NEM H2O;X;X	PPPPPPPPPPPPPPPPPPPPPPPPPPPXXXX	VPEDC(1)NIIC(1)AVC(1)KEVGPNEPLTR	VPEDC(45.94)NIIC(45.94)AVC(45.94)KEVGPNEPLTR	12	3	2.7609	By MS/MS	By MS/MS	By MS/MS	By MS/MS
B1N387;C4M230;C4M2R2	151;151;151	B1N387;C4M230;C4M2R2	C4M230	>tr|B1N387|B1N387_ENTHI Aldehyde-alcohol dehydrogenase 2, putative OS=Entamoeba histolytica OX=5759 GN=EHI_024240 PE=4 SV=1;>tr|C4M230|C4M230_ENTHI Aldehyde-alcohol dehydrogenase OS=Entamoeba histolytica OX=5759 GN=EHI_150490 PE=3 SV=1;>tr|C4M2R2|C4M2R2_EN	1	78.272	2.87748e-07	119.56	51.158	78.272	1	86.6367	2.87748e-07	119.56	1	100.742	0.000571968	100.74	1	78.272	3.65573e-06	94.407	1	88.0288	0.00156126	88.029	1	100.742	0.000571968	100.74	1	81.3812	0.00219068	81.381		1	C	TRNPIVFSFHPSALKCSIMAAKIVRDAAIAA;TRNPIVFSFHPSALKCSIMAAKIVRDAAISA	X;X;X;X;X;X;X;X;X;X;X;X;X;X;NEM H2O;Carbamidomethyl (C);NEM;X;X;Oxidation (M);X;X;NEM H2O;X;X;X;X;X;X;X;X;X	PPPPPPPPPPPPPPPPPPPPPPXXXXXXXXX	TRNPIVFSFHPSALKC(1)SIMAAK	TRNPIVFSFHPSALKC(78.27)SIMAAK	16	4	1.9954	By MS/MS	By MS/MS	By MS/MS	By MS/MS
B1N387;C4M230;C4M2R2	733;747;747	B1N387;C4M230;C4M2R2	C4M230	>tr|B1N387|B1N387_ENTHI Aldehyde-alcohol dehydrogenase 2, putative OS=Entamoeba histolytica OX=5759 GN=EHI_024240 PE=4 SV=1;>tr|C4M230|C4M230_ENTHI Aldehyde-alcohol dehydrogenase OS=Entamoeba histolytica OX=5759 GN=EHI_150490 PE=3 SV=1;>tr|C4M2R2|C4M2R2_EN	1	98.0483	8.2896e-07	119.68	100.37	98.048	1	109.29	8.2896e-07	119.68	1	52.7253	0.00186587	52.725	1	75.3872	0.000142706	78.098	1	67.704	0.000356439	67.704	1	98.0483	7.3332e-06	98.048	1	49.3004	0.00316742	49.3		1	C	MAHKVGAAFHLPHGRCVAVLLPHVIRYNGQK	X;X;X;X;X;X;X;X;X;X;X;X;X;X;X;Carbamidomethyl (C);X;X;X;X;X;X;X;X;X;X;X;X;X;X;X	XXXXXXXXXXXXXXXPPPPPPPPPPPXXXXX	C(1)VAVLLPHVIR	C(98.05)VAVLLPHVIR	1	2	0.032397	By MS/MS	By MS/MS	By MS/MS	By MS/MS
B1N387;C4M230	172;172	B1N387;C4M230	C4M230	>tr|B1N387|B1N387_ENTHI Aldehyde-alcohol dehydrogenase 2, putative OS=Entamoeba histolytica OX=5759 GN=EHI_024240 PE=4 SV=1;>tr|C4M230|C4M230_ENTHI Aldehyde-alcohol dehydrogenase OS=Entamoeba histolytica OX=5759 GN=EHI_150490 PE=3 SV=1	1	104.528	5.80256e-91	254.75	237.88	104.53	1	71.0597	5.80256e-91	254.75	1	116.551	1.58706e-17	116.55	1	104.528	4.47596e-57	198.67	1	169.799	2.99155e-36	169.8	1	65.4279	1.54521e-46	187.51	1	176.695	2.31725e-45	176.7		1	C	KIVRDAAIAAGAPENCIQWIEFGGIEASNKL	NEM H2O;X;X;X;X;X;X;X;X;X;X;X;X;X;X;Carbamidomethyl (C);X;X;X;X;X;X;X;X;X;X;X;X;X;X;X	XPPPPPPPPPPPPPPPPPPPPPPPPPPPPPX	IVRDAAIAAGAPENC(1)IQWIEFGGIEASNK	IVRDAAIAAGAPENC(104.53)IQWIEFGGIEASNK	15	3	-1.0448	By MS/MS	By MS/MS	By MS/MS	By MS/MS
B1N387;C4M230;C4M2R2	590;604;604	B1N387;C4M230;C4M2R2	C4M230	>tr|B1N387|B1N387_ENTHI Aldehyde-alcohol dehydrogenase 2, putative OS=Entamoeba histolytica OX=5759 GN=EHI_024240 PE=4 SV=1;>tr|C4M230|C4M230_ENTHI Aldehyde-alcohol dehydrogenase OS=Entamoeba histolytica OX=5759 GN=EHI_150490 PE=3 SV=1;>tr|C4M2R2|C4M2R2_EN	1	65.8011	2.21968e-103	267.81	236.67	65.801	1	65.8011	2.21968e-103	267.81	1	86.5189	3.07883e-10	86.519	1	91.5992	8.10543e-18	118.85	1	34.0396	7.37463e-14	105.79	1	64.583	3.51121e-14	110.06	1	140.572	1.1508e-22	140.57		1	C	RAFKFPTMGKKARLICIPTTSGTGSEVTPFA	X;X;X;NEM H2O;X;X;X;Oxidation (M);X;NEM H2O;NEM H2O;X;X;X;X;Carbamidomethyl (C);X;X;X;X;X;X;X;X;X;X;X;X;X;X;X	XXXXXXXXXXXXXPPPPPPPPPPPPPPPPPP	LIC(1)IPTTSGTGSEVTPFAVISDHETGKK	LIC(65.8)IPTTSGTGSEVTPFAVISDHETGKK	3	3	0.061004	By MS/MS	By MS/MS	By MS/MS	By MS/MS
B1N387;C4M230;C4M2R2	79;79;79	B1N387;C4M230;C4M2R2	C4M230	>tr|B1N387|B1N387_ENTHI Aldehyde-alcohol dehydrogenase 2, putative OS=Entamoeba histolytica OX=5759 GN=EHI_024240 PE=4 SV=1;>tr|C4M230|C4M230_ENTHI Aldehyde-alcohol dehydrogenase OS=Entamoeba histolytica OX=5759 GN=EHI_150490 PE=3 SV=1;>tr|C4M2R2|C4M2R2_EN	1	93.9091	4.7174e-15	185.66	157.27	93.909	1	119.773	4.7174e-15	185.66					1	98.6762	3.11647e-12	170.11					1	93.9091	5.07247e-11	153.7	1	42.7845	0.00761176	42.785		1	C	GRGIFEDKATKNIFACEHVTHEMRHAKTVGI	X;X;X;X;X;X;X;NEM H2O;X;X;X;X;X;X;X;Carbamidomethyl (C);X;X;X;X;X;X;Oxidation (M);X;X;X;X;X;X;X;X	XXXXXXXXXXXPPPPPPPPPPPPPXXXXXXX	NIFAC(1)EHVTHEMR	NIFAC(93.91)EHVTHEMR	5	2	-2.4663	By MS/MS	By matching	By MS/MS	By matching
B1N387;C4M230;C4M2R2	252;252;252	B1N387;C4M230;C4M2R2	C4M230	>tr|B1N387|B1N387_ENTHI Aldehyde-alcohol dehydrogenase 2, putative OS=Entamoeba histolytica OX=5759 GN=EHI_024240 PE=4 SV=1;>tr|C4M230|C4M230_ENTHI Aldehyde-alcohol dehydrogenase OS=Entamoeba histolytica OX=5759 GN=EHI_150490 PE=3 SV=1;>tr|C4M2R2|C4M2R2_EN	1	104.723	0	430.85	416.48	104.72	1	104.723	0	430.85					1	101.217	2.39137e-84	225.68					1	108.72	3.20977e-50	176.61						1	C	ANDVVMSKSFDNGMICASEQAAIIDKEIYDQ	X;X;X;X;X;Oxidation (M);X;X;X;X;X;X;X;Oxidation (M);X;Carbamidomethyl (C);X;X;X;X;X;X;X;X;X;NEM H2O;X;X;X;X;X	XXXXXXXXPPPPPPPPPPPPPPPPPPPPPPP	SFDNGMIC(1)ASEQAAIIDKEIYDQVVEEMK	SFDNGMIC(104.72)ASEQAAIIDKEIYDQVVEEMK	8	3	-1.5022	By MS/MS	By matching	By MS/MS	By matching
B1N387;C4M230;C4M2R2	114;114;114	B1N387;C4M230;C4M2R2	C4M230	>tr|B1N387|B1N387_ENTHI Aldehyde-alcohol dehydrogenase 2, putative OS=Entamoeba histolytica OX=5759 GN=EHI_024240 PE=4 SV=1;>tr|C4M230|C4M230_ENTHI Aldehyde-alcohol dehydrogenase OS=Entamoeba histolytica OX=5759 GN=EHI_150490 PE=3 SV=1;>tr|C4M2R2|C4M2R2_EN	1	98.8933	1.37177e-56	169.05	153.87	98.893	1	70.6624	3.65075e-48	156.12					1	89.6448	1.37177e-56	169.05	1	102.485	3.38078e-40	140.68	1	98.8933	2.71491e-49	158.37	1	43.8346	1.8475e-56	167.53		1	C	PLYGITEIAEPVGVVCGVTPVTNPTSTAIFK	X;X;X;X;X;X;X;X;X;X;X;X;X;X;X;Carbamidomethyl (C);X;X;X;X;X;X;X;X;X;X;X;X;X;X;X	PPPPPPPPPPPPPPPPPPPPPPPPPPPPPPP	TVGIINVDPLYGITEIAEPVGVVC(1)GVTPVTNPTSTAIFK	TVGIINVDPLYGITEIAEPVGVVC(98.89)GVTPVTNPTSTAIFK	24	5	0.26751	By MS/MS	By matching	By MS/MS	By MS/MS
B1N387;C4M230;C4M2R2	804;845;845	B1N387;C4M230;C4M2R2	C4M230	>tr|B1N387|B1N387_ENTHI Aldehyde-alcohol dehydrogenase 2, putative OS=Entamoeba histolytica OX=5759 GN=EHI_024240 PE=4 SV=1;>tr|C4M230|C4M230_ENTHI Aldehyde-alcohol dehydrogenase OS=Entamoeba histolytica OX=5759 GN=EHI_150490 PE=3 SV=1;>tr|C4M2R2|C4M2R2_EN	1	105.897	5.57811e-78	265.29	240.13	105.9	1	100.282	2.57005e-31	191.64	1	240.587	2.35072e-54	240.59	1	114.276	1.5313e-37	214.24	1	119.68	5.57811e-78	265.29	1	105.897	4.29179e-37	205.06	1	160.764	2.47712e-25	169.25		1	C	MSKVPEMALLAFEDQCSPANPRVPMVKDMEK	Oxidation (M);X;X;X;X;X;Oxidation (M);X;X;X;X;X;X;X;X;Carbamidomethyl (C);X;X;X;X;X;X;X;X;Oxidation (M);X;NEM H2O;X;Oxidation (M);X;X	XXXPPPPPPPPPPPPPPPPPPPXXXXXXXXX	VPEMALLAFEDQC(1)SPANPR	VPEMALLAFEDQC(105.9)SPANPR	13	3	-0.26657	By MS/MS	By MS/MS	By MS/MS	By MS/MS
B1N387;C4M230;C4M2R2	390;404;404	B1N387;C4M230;C4M2R2	C4M230	>tr|B1N387|B1N387_ENTHI Aldehyde-alcohol dehydrogenase 2, putative OS=Entamoeba histolytica OX=5759 GN=EHI_024240 PE=4 SV=1;>tr|C4M230|C4M230_ENTHI Aldehyde-alcohol dehydrogenase OS=Entamoeba histolytica OX=5759 GN=EHI_150490 PE=3 SV=1;>tr|C4M2R2|C4M2R2_EN	1	23.3195	0.00309469	95.502	75.843	23.32	1	23.3195	0.00315994	95.502	1	53.7748	0.0201237	53.775	1	87.4761	0.00309469	87.476	1	47.6028	0.0142019	56.258	1	95.5016	0.00315994	95.502	1	57.8586	0.0142627	57.859		1	C	NDKAVVEKYALTMKACRILHNTPSSQGGIGS	X;X;NEM H2O;X;X;X;X;NEM H2O;X;X;X;X;Oxidation (M);NEM H2O;X;Carbamidomethyl (C);X;X;X;X;X;X;X;X;X;X;X;X;X;X;X	XXXXXXXXPPPPPPPPPXXXXXXXXXXXXXX	YALTMKAC(1)R	YALTMKAC(23.32)R	8	3	-0.57952	By MS/MS	By MS/MS	By MS/MS	By MS/MS
B1N399	715	B1N399	B1N399	>tr|B1N399|B1N399_ENTHI Uncharacterized protein OS=Entamoeba histolytica OX=5759 GN=EHI_015420 PE=4 SV=1	1	60.167	0.000897842	62.005	42.368	60.167									1	62.0047	0.000897842	62.005					1	60.167	0.0010189	60.167						1	C	EFTPDKGNIRAGDIICIYGKLTPLRECAVKE	X;X;X;X;X;X;X;X;X;X;X;X;X;X;X;Carbamidomethyl (C);X;X;X;X;X;X;X;X;X;X;X;X;X;X;X	XXXXXXXXXXPPPPPPPPPPXXXXXXXXXXX	AGDIIC(1)IYGK	AGDIIC(60.17)IYGK	6	2	0.67553	By matching	By matching	By MS/MS	By matching
B1N399	472	B1N399	B1N399	>tr|B1N399|B1N399_ENTHI Uncharacterized protein OS=Entamoeba histolytica OX=5759 GN=EHI_015420 PE=4 SV=1	1	28.2181	0.0390769	28.218	15.23	28.218	0	0		NaN					0	0		NaN					1	28.2181	0.0390769	28.218						2	C	EKCLCIDNYVATNGKCELKCERNTCNCDLTN	X;X;X;X;X;X;X;X;X;X;X;X;X;X;X;Carbamidomethyl (C);X;X;X;Carbamidomethyl (C);X;X;X;X;X;X;X;X;X;X;X	XXXXXXXXXXXXXXXPPPPPPPXXXXXXXXX	C(1)ELKC(1)ER	C(28.22)ELKC(28.22)ER	1	3	0.36987	By matching	By matching	By matching	By matching
B1N399	476	B1N399	B1N399	>tr|B1N399|B1N399_ENTHI Uncharacterized protein OS=Entamoeba histolytica OX=5759 GN=EHI_015420 PE=4 SV=1	1	28.2181	0.0390769	28.218	15.23	28.218	0	0		NaN					0	0		NaN					1	28.2181	0.0390769	28.218						2	C	CIDNYVATNGKCELKCERNTCNCDLTNPCIS	X;X;X;X;X;X;X;X;X;X;X;Carbamidomethyl (C);X;X;X;Carbamidomethyl (C);X;X;X;X;X;X;X;X;X;X;X;X;X;X;X	XXXXXXXXXXXPPPPPPPXXXXXXXXXXXXX	C(1)ELKC(1)ER	C(28.22)ELKC(28.22)ER	5	3	0.36987	By matching	By matching	By matching	By matching
B1N399	503	B1N399	B1N399	>tr|B1N399|B1N399_ENTHI Uncharacterized protein OS=Entamoeba histolytica OX=5759 GN=EHI_015420 PE=4 SV=1	1	186.851	5.76622e-21	186.85	163.86	186.85	1	186.851	5.76622e-21	186.85																						3	C	PCISCNVEHLNISTRCQECDSGYELLNGICK	X;X;X;X;X;X;X;X;X;X;X;X;X;X;X;Carbamidomethyl (C);X;X;Carbamidomethyl (C);X;X;X;X;X;X;X;X;X;X;Carbamidomethyl (C);X	XXXXXXXXXXXXXXXPPPPPPPPPPPPPPPP	C(1)QEC(1)DSGYELLNGIC(1)K	C(186.85)QEC(186.85)DSGYELLNGIC(186.85)K	1	2	0.028082	By MS/MS	By matching	By matching	By matching
B1N399	506	B1N399	B1N399	>tr|B1N399|B1N399_ENTHI Uncharacterized protein OS=Entamoeba histolytica OX=5759 GN=EHI_015420 PE=4 SV=1	1	186.851	5.76622e-21	186.85	163.86	186.85	1	186.851	5.76622e-21	186.85																						3	C	SCNVEHLNISTRCQECDSGYELLNGICKTVC	X;X;X;X;X;X;X;X;X;X;X;X;Carbamidomethyl (C);X;X;Carbamidomethyl (C);X;X;X;X;X;X;X;X;X;X;Carbamidomethyl (C);X;X;X;X	XXXXXXXXXXXXPPPPPPPPPPPPPPPPXXX	C(1)QEC(1)DSGYELLNGIC(1)K	C(186.85)QEC(186.85)DSGYELLNGIC(186.85)K	4	2	0.028082	By MS/MS	By matching	By matching	By matching
B1N399	517	B1N399	B1N399	>tr|B1N399|B1N399_ENTHI Uncharacterized protein OS=Entamoeba histolytica OX=5759 GN=EHI_015420 PE=4 SV=1	1	186.851	5.76622e-21	186.85	163.86	186.85	1	186.851	5.76622e-21	186.85																						3	C	RCQECDSGYELLNGICKTVCGNKIRSSDEQC	X;Carbamidomethyl (C);X;X;Carbamidomethyl (C);X;X;X;X;X;X;X;X;X;X;Carbamidomethyl (C);X;X;X;X;X;X;X;X;X;X;X;X;X;X;X	XPPPPPPPPPPPPPPPPXXXXXXXXXXXXXX	C(1)QEC(1)DSGYELLNGIC(1)K	C(186.85)QEC(186.85)DSGYELLNGIC(186.85)K	15	2	0.028082	By MS/MS	By matching	By matching	By matching
B1N399	191	B1N399	B1N399	>tr|B1N399|B1N399_ENTHI Uncharacterized protein OS=Entamoeba histolytica OX=5759 GN=EHI_015420 PE=4 SV=1	1	35.872	0.00300038	63.565	41.434	35.872	1	63.5651	0.00300038	63.565					1	28.2086	0.0457582	28.209	1	45.6801	0.0294017	45.68	1	35.872	0.0261265	35.872	1	43.4484	0.0134816	43.448		1	C	DNNELTHLGKGAATICVKNPTTNECTYVLFA	X;X;X;X;X;X;X;X;X;X;X;X;X;X;X;Carbamidomethyl (C);X;X;X;X;X;X;X;X;X;X;X;X;X;X;X	XXXXXXXXXXPPPPPPPPXXXXXXXXXXXXX	GAATIC(1)VK	GAATIC(35.87)VK	6	2	-0.51908	By MS/MS	By matching	By MS/MS	By matching
B1N399	146	B1N399	B1N399	>tr|B1N399|B1N399_ENTHI Uncharacterized protein OS=Entamoeba histolytica OX=5759 GN=EHI_015420 PE=4 SV=1	1	68.5575	0.000192081	90.15	62.669	68.557	1	90.1504	0.000192081	90.15					1	68.5575	0.000651618	68.557					0	0		NaN	0	0		NaN		1	C	TLGFVPKIGGGFIKICQIDHIPRLDAPIVDN	X;X;X;X;X;X;X;X;X;X;X;X;X;X;X;Carbamidomethyl (C);X;X;X;X;X;X;X;X;X;X;X;X;X;X;X	XXXXXXXXXXXXXXPPPPPPPPPXXXXXXXX	IC(1)QIDHIPR	IC(68.56)QIDHIPR	2	3	-0.52664	By MS/MS	By matching	By MS/MS	By matching
B1N399	298	B1N399	B1N399	>tr|B1N399|B1N399_ENTHI Uncharacterized protein OS=Entamoeba histolytica OX=5759 GN=EHI_015420 PE=4 SV=1	1	47.6178	4.81871e-16	142.88	127.6	47.618	1	142.876	4.81871e-16	142.88					1	23.2145	0.0281745	23.215	0	0		NaN	1	47.6178	0.00126416	47.618	0	0		NaN		1	C	QNTDIGNKESKSDTPCVLVIKPSYDTNTNKV	X;X;X;X;X;X;X;X;X;X;X;X;X;X;X;Carbamidomethyl (C);X;X;X;X;X;X;X;X;X;X;X;X;X;X;X	XXXXXXXXXXXPPPPPPPPPPPPPPPPPPPX	SDTPC(1)VLVIKPSYDTNTNK	SDTPC(47.62)VLVIKPSYDTNTNK	5	3	0.25345	By MS/MS	By matching	By MS/MS	By matching
B1N399	683	B1N399	B1N399	>tr|B1N399|B1N399_ENTHI Uncharacterized protein OS=Entamoeba histolytica OX=5759 GN=EHI_015420 PE=4 SV=1	1	67.1016	6.71669e-05	78.814	58.607	67.102	1	76.3575	9.13553e-05	76.358					1	78.8139	6.71669e-05	78.814					1	67.1016	0.000281629	67.102						1	C	KYVFQLFVGNKSLNICSFAIGDPRLDKDDYD	X;X;X;X;X;X;X;X;X;X;X;X;X;X;X;Carbamidomethyl (C);X;X;X;X;X;X;X;X;X;X;X;X;X;X;X	XXXXXXXXXXXPPPPPPPPPPPPPXXXXXXX	SLNIC(1)SFAIGDPR	SLNIC(67.1)SFAIGDPR	5	2	-0.64901	By MS/MS	By matching	By MS/MS	By matching
B1N3B2	37	B1N3B2	B1N3B2	>tr|B1N3B2|B1N3B2_ENTHI LIM zinc finger domain containing protein OS=Entamoeba histolytica OX=5759 GN=EHI_030800 PE=4 SV=1	1	55.5305	0.0182036	55.531	47.19	55.531																	1	55.5305	0.0182036	55.531	1	45.6801	0.0325835	45.68		1	C	TNWCDECFNYKQCAKCGNPITRNMVIVKTFE	X;X;X;X;X;X;X;X;X;X;X;X;X;X;X;Carbamidomethyl (C);X;X;X;X;X;X;X;X;X;X;X;X;X;X;X	XXXXXXXXXXXXXXXPPPPPPPXXXXXXXXX	C(1)GNPITR	C(55.53)GNPITR	1	2	1.1866	By matching	By matching	By matching	By matching
B1N3B2	113	B1N3B2	B1N3B2	>tr|B1N3B2|B1N3B2_ENTHI LIM zinc finger domain containing protein OS=Entamoeba histolytica OX=5759 GN=EHI_030800 PE=4 SV=1	1	78.7702	0.0011905	78.77	53.995	78.77	1	78.7702	0.0011905	78.77																						1	C	GMSFLEVFGKKWHEGCVKCVKCHRQIGDEQF	X;X;X;X;X;X;X;X;X;X;X;X;X;X;X;Carbamidomethyl (C);X;X;X;X;X;X;X;X;X;X;X;X;X;X;X	XXXXXXXXXXPPPPPPPPXXXXXXXXXXXXX	KWHEGC(1)VK	KWHEGC(78.77)VK	6	2	0.09318	By MS/MS	By matching	By matching	By matching
B1N3B2	5	B1N3B2	B1N3B2	>tr|B1N3B2|B1N3B2_ENTHI LIM zinc finger domain containing protein OS=Entamoeba histolytica OX=5759 GN=EHI_030800 PE=4 SV=1	1	84.6146	0.000383781	114.89	97.655	84.615	1	114.895	0.000383781	114.89	1	114.895	0.000383781	114.89	1	102.622	0.00057897	102.62	1	83.7828	0.000661795	83.783	1	84.6146	0.00062529	84.615	1	100.984	0.000611416	100.98		2	C	___________MSLECSGCHKLFKELNSGLK	X;X;X;X;X;X;X;X;X;X;X;X;X;X;X;Carbamidomethyl (C);X;X;Carbamidomethyl (C);X;X;X;X;X;X;X;X;X;X;X;X	XXXXXXXXXXXXPPPPPPPPPXXXXXXXXXX	SLEC(1)SGC(1)HK	SLEC(84.61)SGC(84.61)HK	4	2	-0.89749	By MS/MS	By MS/MS	By MS/MS	By MS/MS
B1N3B2	8	B1N3B2	B1N3B2	>tr|B1N3B2|B1N3B2_ENTHI LIM zinc finger domain containing protein OS=Entamoeba histolytica OX=5759 GN=EHI_030800 PE=4 SV=1	1	84.6146	0.000383781	114.89	97.655	84.615	1	114.895	0.000383781	114.89	1	114.895	0.000383781	114.89	1	102.622	0.00057897	102.62	1	83.7828	0.000661795	83.783	1	84.6146	0.00062529	84.615	1	100.984	0.000611416	100.98		2	C	________MSLECSGCHKLFKELNSGLKGTN	X;X;X;X;X;X;X;X;X;X;X;X;Carbamidomethyl (C);X;X;Carbamidomethyl (C);X;X;X;X;X;X;X;X;X;X;X;X;X;X;X	XXXXXXXXXPPPPPPPPPXXXXXXXXXXXXX	SLEC(1)SGC(1)HK	SLEC(84.61)SGC(84.61)HK	7	2	-0.89749	By MS/MS	By MS/MS	By MS/MS	By MS/MS
B1N3B2	60	B1N3B2	B1N3B2	>tr|B1N3B2|B1N3B2_ENTHI LIM zinc finger domain containing protein OS=Entamoeba histolytica OX=5759 GN=EHI_030800 PE=4 SV=1	1	96.4641	8.32922e-11	130.2	112	96.464	1	85.1626	3.78371e-05	85.163					1	96.4641	8.32922e-11	130.2	0	0		NaN	0	0		NaN	0	0		NaN		1	C	MVIVKTFEGKDYHAECFKCVSCKSRIKKEPI	X;X;X;X;X;X;X;X;X;X;X;X;X;X;X;Carbamidomethyl (C);X;X;X;X;X;X;X;X;X;X;X;X;X;X;X	XXXXXPPPPPPPPPPPPPXXXXXXXXXXXXX	TFEGKDYHAEC(1)FK	TFEGKDYHAEC(96.46)FK	11	3	0.066317	By MS/MS	By matching	By MS/MS	By matching
B1N3B9	423	B1N3B9	B1N3B9	>tr|B1N3B9|B1N3B9_ENTHI Uncharacterized protein OS=Entamoeba histolytica OX=5759 GN=EHI_192560 PE=4 SV=1	0.999666	35.1995	0.0444787	44.98	15.213	44.98	0.999666	35.1995	0.0444787	44.98					0	0		NaN					0	0		NaN						1	C	ITHLWKEGCHPPCGKCKTGYICSKGSVCVIK	X;X;X;X;X;X;X;X;NEM H2O;Propionamide_aa;X;X;X;X;X;Carbamidomethyl (C);Propionamide_aa;X;X;X;X;NEM;X;X;X;X;X;X;X;X;X	XXXXXXXXXXXXXXXPPPPPPPPPXXXXXXX	C(1)KTGYICSK	C(35.2)KTGYIC(-35.2)SK	1	2	-1.7298	By MS/MS	By matching	By matching	By matching
B1N3C2	514	B1N3C2	B1N3C2	>tr|B1N3C2|B1N3C2_ENTHI Plasma membrane calcium-transporting ATPase 1, putative OS=Entamoeba histolytica OX=5759 GN=EHI_001150 PE=4 SV=1	1	98.582	0.000499425	98.582	73.492	98.582	1	98.582	0.000499425	98.582																						1	C	GYISTIEDYPGKEYICNDNKKHTIIDVQEDT	X;X;X;X;X;X;X;X;X;X;X;X;X;X;X;Carbamidomethyl (C);X;X;X;X;X;X;X;X;X;X;X;X;X;X;X	XXXXXXXXXXXXPPPPPPPPPXXXXXXXXXX	EYIC(1)NDNKK	EYIC(98.58)NDNKK	4	2	-1.2456	By MS/MS	By matching	By matching	By matching
B1N3C2;C4MAZ0	135;517	B1N3C2;C4MAZ0	C4MAZ0	>tr|B1N3C2|B1N3C2_ENTHI Plasma membrane calcium-transporting ATPase 1, putative OS=Entamoeba histolytica OX=5759 GN=EHI_001150 PE=4 SV=1;>tr|C4MAZ0|C4MAZ0_ENTHI Plasma membrane calcium ion-transporting ATPase, putative OS=Entamoeba histolytica OX=5759 GN=E	1	65.0429	0.000292339	68.171	54.162	65.043	0	0		NaN					1	68.1712	0.000292339	68.171					1	65.0429	0.000500742	65.043	0	0		NaN		1	C	VFNSENKRMDTVSDNCIYSKGAPEIIIGESM	X;X;X;X;X;X;X;X;X;X;X;X;X;X;X;Carbamidomethyl (C);X;X;X;X;X;X;X;X;X;X;X;X;X;X;X	XXXXXXXXPPPPPPPPPPPPXXXXXXXXXXX	MDTVSDNC(1)IYSK	MDTVSDNC(65.04)IYSK	8	2	-0.64247	By matching	By matching	By MS/MS	By matching
B1N3D5	305	B1N3D5	B1N3D5	>tr|B1N3D5|B1N3D5_ENTHI Leucine-rich repeat containing protein OS=Entamoeba histolytica OX=5759 GN=EHI_164460 PE=4 SV=1	1	65.1572	0.000690175	65.157	38.368	65.157	1	55.6486	0.00497721	55.649	0	0		NaN	1	65.1572	0.000690175	65.157					0	0		NaN						1	C	MSKREYKVIKLDVNGCGINKLGDMMRGMMLN	X;X;X;X;X;X;X;X;X;X;X;X;X;X;X;Carbamidomethyl (C);X;X;X;X;X;X;X;X;X;X;X;X;X;X;X	XXXXXXXXXXPPPPPPPPPPXXXXXXXXXXX	LDVNGC(1)GINK	LDVNGC(65.16)GINK	6	2	-3.1378	By matching	By matching	By MS/MS	By matching
B1N3D5	703	B1N3D5	B1N3D5	>tr|B1N3D5|B1N3D5_ENTHI Leucine-rich repeat containing protein OS=Entamoeba histolytica OX=5759 GN=EHI_164460 PE=4 SV=1	1	108.184	7.13035e-15	131.45	118.03	108.18	1	131.448	7.13035e-15	131.45					1	50.1781	0.00147574	50.178					1	108.184	7.09444e-07	108.18	0	0		NaN		1	C	QPKLIGKYIEPTQTDCPEMPEQLKSFSDLKK	X;X;X;X;X;X;X;X;X;X;X;X;X;X;X;Carbamidomethyl (C);X;X;X;X;X;X;X;X;X;X;X;X;X;X;X	XXXXXXXPPPPPPPPPPPPPPPPPXXXXXXX	YIEPTQTDC(1)PEMPEQLK	YIEPTQTDC(108.18)PEMPEQLK	9	2	0.9682	By MS/MS	By matching	By MS/MS	By matching
B1N3E1	121	B1N3E1	B1N3E1	>tr|B1N3E1|B1N3E1_ENTHI Galactose binding lectin 35 kDa subunit, putative OS=Entamoeba histolytica OX=5759 GN=EHI_027800 PE=4 SV=1	1	35.2686	0.0218016	35.269	27.989	35.269	1	25.6214	0.0458678	25.621					1	35.2686	0.0218016	35.269					0	0		NaN						1	C	NELQFFEFAPYRMYTCYAIPKRVHDIRAGAV	X;X;X;X;X;X;X;X;X;X;X;X;X;X;X;Carbamidomethyl (C);X;X;X;X;X;X;X;X;X;X;X;X;X;X;X	XXXXXXXXXXXXPPPPPPPPPXXXXXXXXXX	MYTC(1)YAIPK	MYTC(35.27)YAIPK	4	2	-0.13606	By MS/MS	By matching	By MS/MS	By matching
B1N3F8;C4M7V3;B1N420	145;129;145	B1N3F8;B1N420	B1N3F8	>tr|B1N3F8|B1N3F8_ENTHI 60S ribosomal protein L27a, putative OS=Entamoeba histolytica OX=5759 GN=EHI_069490 PE=2 SV=1;>tr|C4M7V3|C4M7V3_ENTHI 60S ribosomal protein L27a, putative OS=Entamoeba histolytica OX=5759 GN=EHI_020370 PE=3 SV=1;>tr|B1N420|B1N420_EN	1	79.1455	0.00287653	79.146	55.997	79.146	0	0		NaN													1	79.1455	0.00287653	79.146	0	0		NaN		1	C	FSEKAQQKIKAVGGACELTA___________	X;X;X;X;X;X;X;X;X;X;X;X;X;X;X;Carbamidomethyl (C);X;X;X;X;X;X;X;X;X;X;X;X;X;X;X	XXXXXXXXXXPPPPPPPPPPXXXXXXXXXXX	AVGGAC(1)ELTA	AVGGAC(79.15)ELTA	6	1	-0.90841	By matching	By matching	By matching	By matching
B1N3F8;C4M7V3	104;88	B1N3F8	B1N3F8	>tr|B1N3F8|B1N3F8_ENTHI 60S ribosomal protein L27a, putative OS=Entamoeba histolytica OX=5759 GN=EHI_069490 PE=2 SV=1;>tr|C4M7V3|C4M7V3_ENTHI 60S ribosomal protein L27a, putative OS=Entamoeba histolytica OX=5759 GN=EHI_020370 PE=3 SV=1	1	66.0043	0.000436694	66.004	49.091	66.004													0	0		NaN					1	66.0043	0.000436694	66.004		1	C	QYKNAKVGEEVPVIDCVKHGYFKVLGKGFLP	X;X;X;X;X;X;X;X;X;X;X;X;X;X;X;Carbamidomethyl (C);X;X;X;X;X;X;X;X;X;X;X;X;X;X;X	XXXXXXPPPPPPPPPPPPXXXXXXXXXXXXX	VGEEVPVIDC(1)VK	VGEEVPVIDC(66)VK	10	2	-0.67282	By matching	By matching	By matching	By matching
B1N3H5	46	B1N3H5	B1N3H5	>tr|B1N3H5|B1N3H5_ENTHI Uncharacterized protein OS=Entamoeba histolytica OX=5759 GN=EHI_006180 PE=4 SV=1	1	45.6139	0.000478091	61.042	54.31	45.614	1	61.0419	0.000478091	61.042					0	0		NaN					1	45.6139	0.00130703	52.191						2	C	GKLSKKCQYIKSDLVCSFETTHCRKCLVHSN	X;X;X;X;X;X;X;X;X;X;X;X;X;X;X;Carbamidomethyl (C);X;X;X;X;X;X;Carbamidomethyl (C);X;X;X;X;X;X;X;X	XXXXXXXXXXXPPPPPPPPPPPPPPXXXXXX	SDLVC(1)SFETTHC(1)RK	SDLVC(45.61)SFETTHC(45.61)RK	5	3	-1.2018	By MS/MS	By matching	By matching	By matching
B1N3H5	53	B1N3H5	B1N3H5	>tr|B1N3H5|B1N3H5_ENTHI Uncharacterized protein OS=Entamoeba histolytica OX=5759 GN=EHI_006180 PE=4 SV=1	1	45.6139	0.000478091	61.042	54.31	45.614	1	61.0419	0.000478091	61.042					0	0		NaN					1	45.6139	0.00130703	52.191						2	C	QYIKSDLVCSFETTHCRKCLVHSNNVFFISS	X;X;X;X;X;X;X;X;Carbamidomethyl (C);X;X;X;X;X;X;Carbamidomethyl (C);X;X;X;X;X;X;X;X;X;X;X;X;X;X;X	XXXXPPPPPPPPPPPPPPXXXXXXXXXXXXX	SDLVC(1)SFETTHC(1)RK	SDLVC(45.61)SFETTHC(45.61)RK	12	3	-1.2018	By MS/MS	By matching	By matching	By matching
B1N3K6	153	B1N3K6	B1N3K6	>tr|B1N3K6|B1N3K6_ENTHI Major facilitator superfamily protein OS=Entamoeba histolytica OX=5759 GN=EHI_138340 PE=4 SV=1	0.5	0	0.0424671	21.671	11.318	21.671	0.5	0	0.0424671	21.671																						1	C	NEIYQGETNQKMSWFCCSWSFGKAIGFVLGG	X;X;X;X;X;X;X;X;X;X;X;Oxidation (M);X;X;X;Carbamidomethyl (C);NEM;X;X;X;X;X;X;X;X;X;X;X;X;X;X	XXXXXXXXXXXPPPPPPPPPPPPXXXXXXXX	MSWFC(0.5)C(0.5)SWSFGK	MSWFC(0)C(0)SWSFGK	5	2	-2.6358	By MS/MS	By matching	By matching	By matching
B1N3K6	154	B1N3K6	B1N3K6	>tr|B1N3K6|B1N3K6_ENTHI Major facilitator superfamily protein OS=Entamoeba histolytica OX=5759 GN=EHI_138340 PE=4 SV=1	0.5	0	0.0424671	21.671	11.318	21.671	0.5	0	0.0424671	21.671																						1	C	EIYQGETNQKMSWFCCSWSFGKAIGFVLGGP	X;X;X;X;X;X;X;X;X;X;X;X;X;X;X;X;X;X;X;X;X;X;X;X;X;X;X;X;X;X;X	XXXXXXXXXXXXXXXXXXXXXXXXXXXXXXX	MSWFC(0.5)C(0.5)SWSFGK	MSWFC(0)C(0)SWSFGK	6	2	-2.6358	By MS/MS	By matching	By matching	By matching
B1N3L7;C4LSV2;C4M131	295;296;295	B1N3L7;C4LSV2;C4M131	C4M131	>tr|B1N3L7|B1N3L7_ENTHI ENTH domain protein, putative OS=Entamoeba histolytica OX=5759 GN=EHI_052870 PE=4 SV=1;>tr|C4LSV2|C4LSV2_ENTHI EH-domain containing protein, putative OS=Entamoeba histolytica OX=5759 GN=EHI_152680 PE=4 SV=1;>tr|C4M131|C4M131_ENTHI R	1	46.0157	0.0347331	46.016	7.8824	46.016	0	0		NaN	1	38.1604	0.0563125	38.16	1	46.0157	0.0347331	46.016	0	0		NaN	0	0		NaN	0	0		NaN		1	C	HALPKQATVRKVNELCKRARLAKANAYITSY;HALPKQATVRKVNELCKRARLAKTNAYITSY	X;X;X;X;X;X;X;X;X;X;X;X;X;X;X;Carbamidomethyl (C);X;X;X;X;X;X;X;X;X;X;X;X;X;X;X	XXXXXXXXXXPPPPPPPXXXXXXXXXXXXXX	KVNELC(1)K	KVNELC(46.02)K	6	2	0.10046	By matching	By MS/MS	By MS/MS	By matching
B1N3N6	336	B1N3N6	B1N3N6	>tr|B1N3N6|B1N3N6_ENTHI Uncharacterized protein OS=Entamoeba histolytica OX=5759 GN=EHI_097980 PE=3 SV=1	1	35.4956	0.0185849	35.496	25.841	35.496	0	0		NaN					0	0		NaN									1	35.4956	0.0185849	35.496		1	C	FVPDDTEFPYKAVDVCTTYEKVISRDGRAKS	X;X;X;X;X;X;X;X;X;X;X;X;X;X;X;Carbamidomethyl (C);X;X;X;X;X;X;X;X;X;X;X;X;X;X;X	XXXXXXXXXXXPPPPPPPPPPXXXXXXXXXX	AVDVC(1)TTYEK	AVDVC(35.5)TTYEK	5	2	2.9977	By matching	By matching	By matching	By matching
B1N3P0;B1N3F3	43;43	B1N3P0	B1N3P0	>tr|B1N3P0|B1N3P0_ENTHI RNAseL inhibitor-like protein, putative OS=Entamoeba histolytica OX=5759 GN=EHI_156200 PE=4 SV=1;>tr|B1N3F3|B1N3F3_ENTHI ATP-binding cassette sub-family E member 1, putative OS=Entamoeba histolytica OX=5759 GN=EHI_150540 PE=4 SV=1	1	37.9681	0.00027517	70.496	56.694	37.968	1	70.4956	0.00027517	70.496	1	23.1178	0.0471171	23.118	1	37.9681	0.0118354	37.968	1	37.9681	0.0118354	37.968	1	37.9681	0.0118354	37.968	1	32.159	0.0256703	32.159		1	C	LECKKTCPINRAGGLCIEVLPKDKRAVISET	X;X;X;X;X;X;Carbamidomethyl (C);X;X;X;X;X;X;X;X;Carbamidomethyl (C);X;X;X;X;X;X;X;X;X;X;X;X;X;X;X	XXXXXXXXXXXPPPPPPPPPPPXXXXXXXXX	AGGLC(1)IEVLPK	AGGLC(37.97)IEVLPK	5	2	-0.29728	By MS/MS	By MS/MS	By MS/MS	By MS/MS
B1N3P0;B1N3F3	70;70	B1N3P0	B1N3P0	>tr|B1N3P0|B1N3P0_ENTHI RNAseL inhibitor-like protein, putative OS=Entamoeba histolytica OX=5759 GN=EHI_156200 PE=4 SV=1;>tr|B1N3F3|B1N3F3_ENTHI ATP-binding cassette sub-family E member 1, putative OS=Entamoeba histolytica OX=5759 GN=EHI_150540 PE=4 SV=1	1	58.815	0.00126942	75.109	75.109	58.815	1	75.1092	0.00126942	75.109					1	66.073	0.00779667	66.073					1	58.815	0.00299537	58.815						1	C	ISETLCIGCALCVKKCPFEAIKIINLPKNLE	X;X;X;X;X;X;X;X;X;X;X;X;X;X;X;Carbamidomethyl (C);X;X;X;X;X;X;X;X;X;X;X;X;X;X;X	XXXXXXXXXXXXXXPPPPPPPPXXXXXXXXX	KC(1)PFEAIK	KC(58.82)PFEAIK	2	3	-0.54757	By MS/MS	By matching	By matching	By matching
B1N3P0;B1N3F3	34;34	B1N3P0	B1N3P0	>tr|B1N3P0|B1N3P0_ENTHI RNAseL inhibitor-like protein, putative OS=Entamoeba histolytica OX=5759 GN=EHI_156200 PE=4 SV=1;>tr|B1N3F3|B1N3F3_ENTHI ATP-binding cassette sub-family E member 1, putative OS=Entamoeba histolytica OX=5759 GN=EHI_150540 PE=4 SV=1	1	64.7574	0.0112338	64.757	47.464	64.757	0	0		NaN					1	64.7574	0.0112338	64.757					0	0		NaN						1	C	DRCKPGKCRLECKKTCPINRAGGLCIEVLPK	X;X;X;X;X;X;X;X;X;X;X;X;X;X;X;Carbamidomethyl (C);X;X;X;X;X;X;X;X;Carbamidomethyl (C);NEM;NEM H2O;X;X;X;X;X;X	XXXXXXXXXXXXXPPPPPPPXXXXXXXXXXX	KTC(1)PINR	KTC(64.76)PINR	3	2	0.15753	By matching	By matching	By MS/MS	By matching
B1N3P0;B1N3F3	87;87	B1N3P0	B1N3P0	>tr|B1N3P0|B1N3P0_ENTHI RNAseL inhibitor-like protein, putative OS=Entamoeba histolytica OX=5759 GN=EHI_156200 PE=4 SV=1;>tr|B1N3F3|B1N3F3_ENTHI ATP-binding cassette sub-family E member 1, putative OS=Entamoeba histolytica OX=5759 GN=EHI_150540 PE=4 SV=1	1	53.7564	0.000126651	113.62	71.023	53.756	1	39.8484	0.00021961	100.25	1	45.368	0.00757374	45.368	1	53.7564	0.000126651	113.62	1	42.7176	0.0258689	42.718	1	53.7564	0.000126651	113.62	1	41.7043	0.00974281	41.704		1	C	FEAIKIINLPKNLEQCTTHRYGPNSFKLHRL	X;X;X;X;X;X;X;X;X;X;X;X;X;X;X;Carbamidomethyl (C);X;X;X;X;X;X;X;X;X;X;X;X;X;X;X	XXXXXXXXXXXPPPPPPPPPXXXXXXXXXXX	NLEQC(1)TTHR	NLEQC(53.76)TTHR	5	3	-0.68844	By MS/MS	By MS/MS	By MS/MS	By MS/MS
B1N3Q0	962	B1N3Q0	B1N3Q0	>tr|B1N3Q0|B1N3Q0_ENTHI Rap-GAP domain-containing protein OS=Entamoeba histolytica OX=5759 GN=EHI_138990 PE=4 SV=1	1	84.2973	1.39703e-05	84.297	72.029	84.297					1	33.7874	0.0187577	33.787					1	62.1618	0.000549061	62.162					1	84.2973	1.39703e-05	84.297		1	C	SQVVFGSPTEHGMFKCTEANIPDQSLSRYFA	X;X;X;X;X;X;X;X;X;X;X;X;X;X;X;Carbamidomethyl (C);X;X;X;X;X;X;X;X;X;X;X;X;X;X;X	XXXXXXXXXXXXXXXPPPPPPPPPPPPPXXX	C(1)TEANIPDQSLSR	C(84.3)TEANIPDQSLSR	1	2	-0.97711	By matching	By MS/MS	By matching	By MS/MS
B1N3Q0	716	B1N3Q0	B1N3Q0	>tr|B1N3Q0|B1N3Q0_ENTHI Rap-GAP domain-containing protein OS=Entamoeba histolytica OX=5759 GN=EHI_138990 PE=4 SV=1	1	39.5868	0.0138689	39.587	22.968	39.587	0	0		NaN					1	39.5868	0.0138689	39.587					0	0		NaN							C	SSYDMFSNPNNKFLPCLPSVLQSLSKLSTGN	X;X;X;X;X;X;X;X;X;X;X;X;X;X;X;Carbamidomethyl (C);X;X;X;X;X;X;X;X;X;X;X;X;X;X;X	XXXXXXXXXXXXPPPPPPPPPPPPPPXXXXX	FLPC(1)LPSVLQSLSK	FLPC(39.59)LPSVLQSLSK	4	2	-1.3574	By matching	By matching	By matching	By matching
B1N3Q0	399	B1N3Q0	B1N3Q0	>tr|B1N3Q0|B1N3Q0_ENTHI Rap-GAP domain-containing protein OS=Entamoeba histolytica OX=5759 GN=EHI_138990 PE=4 SV=1	1	192.162	3.00023e-31	192.16	160.55	192.16	1	192.162	3.00023e-31	192.16					0	0		NaN					0	0		NaN						1	C	LTPSLKSTILATVTQCALNFTQFVKNEVYSP	X;X;X;X;X;X;X;X;X;X;X;X;X;X;X;Carbamidomethyl (C);X;X;X;X;X;X;X;X;X;X;X;X;X;X;X	XXXXXXPPPPPPPPPPPPPPPPPPPXXXXXX	STILATVTQC(1)ALNFTQFVK	STILATVTQC(192.16)ALNFTQFVK	10	2	1.5468	By MS/MS	By matching	By matching	By matching
C4M3X8;B1N3Q8	11;11	C4M3X8	C4M3X8	>tr|C4M3X8|C4M3X8_ENTHI Serine/threonine protein phosphatase PP2A catalytic subunit, putative OS=Entamoeba histolytica OX=5759 GN=EHI_200730 PE=4 SV=1;>tr|B1N3Q8|B1N3Q8_ENTHI Serine/threonine protein phosphatase PP2A catalytic subunit, putative OS=Entamoeb	1	105.029	9.30578e-08	105.03	88.806	105.03																	0	0		NaN	1	105.029	9.30578e-08	105.03		1	C	_____MVTTMAHLNECINKVSELEVIHEEVI	X;X;X;X;X;X;X;X;X;X;X;X;X;X;X;Carbamidomethyl (C);X;X;X;X;X;X;X;X;X;X;X;X;X;X;X	XXXXXXPPPPPPPPPPPPPXXXXXXXXXXXX	VTTMAHLNEC(1)INK	VTTMAHLNEC(105.03)INK	10	2	1.0167	By matching	By matching	By matching	By matching
C4LVH6;B1N3R9	175;175	C4LVH6	C4LVH6	>tr|C4LVH6|C4LVH6_ENTHI 60S ribosomal protein L7a OS=Entamoeba histolytica OX=5759 GN=EHI_103310 PE=3 SV=1;>tr|B1N3R9|B1N3R9_ENTHI 60S ribosomal protein L7a OS=Entamoeba histolytica OX=5759 GN=EHI_029530 PE=2 SV=1	1	36.684	0.000136423	91.658	59.518	36.684	0	0		NaN	0	0		NaN	1	36.684	0.032084	36.684	1	51.4359	0.00720919	51.436	0	0		NaN	1	24.2318	0.000136423	91.658		1	C	VVYLPYLCKKLQVPYCIVKGKARLGQLIHRS	X;X;X;X;X;X;X;X;X;X;X;X;X;X;X;Carbamidomethyl (C);NEM;X;X;X;X;X;X;X;X;X;X;X;X;X;X;X	XXXXXXXXXPPPPPPPPPPXXXXXXXXXXXX	KLQVPYC(1)IVK	KLQVPYC(36.68)IVK	7	2	1.0772	By matching	By matching	By matching	By matching
C4M818;B1N3S8;C4MAC4;B1N5J9	240;240;81;240	C4M818	C4M818	>tr|C4M818|C4M818_ENTHI Transketolase OS=Entamoeba histolytica OX=5759 GN=EHI_002160 PE=3 SV=1;>tr|B1N3S8|B1N3S8_ENTHI Transketolase, putative OS=Entamoeba histolytica OX=5759 GN=EHI_177870 PE=3 SV=1;>tr|C4MAC4|C4MAC4_ENTHI Transketolase, putative OS=Entam	1	24.2543	0.00501793	42.788	20.297	24.254													1	42.7884	0.00501793	42.788	0	0		NaN	1	24.2543	0.0556427	24.254		2	C	AALVLAKASDKPTLICCKTTIGLGMPNKQGT	X;X;X;X;X;X;X;X;X;X;X;X;X;X;X;Carbamidomethyl (C);Carbamidomethyl (C);X;X;X;X;X;X;X;X;X;X;X;X;X;X	XXXXXXXPPPPPPPPPPPXXXXXXXXXXXXX	ASDKPTLIC(1)C(1)K	ASDKPTLIC(24.25)C(24.25)K	9	2	2.0444	By matching	By matching	By matching	By MS/MS
C4M818;B1N3S8;C4MAC4;B1N5J9	241;241;82;241	C4M818	C4M818	>tr|C4M818|C4M818_ENTHI Transketolase OS=Entamoeba histolytica OX=5759 GN=EHI_002160 PE=3 SV=1;>tr|B1N3S8|B1N3S8_ENTHI Transketolase, putative OS=Entamoeba histolytica OX=5759 GN=EHI_177870 PE=3 SV=1;>tr|C4MAC4|C4MAC4_ENTHI Transketolase, putative OS=Entam	1	24.2543	0.00501793	42.788	20.297	24.254													1	42.7884	0.00501793	42.788	0	0		NaN	1	24.2543	0.0556427	24.254		2	C	ALVLAKASDKPTLICCKTTIGLGMPNKQGTS	X;X;X;X;X;X;X;X;X;X;X;X;X;X;Carbamidomethyl (C);Carbamidomethyl (C);X;X;X;X;X;X;X;X;X;X;X;X;X;X;X	XXXXXXPPPPPPPPPPPXXXXXXXXXXXXXX	ASDKPTLIC(1)C(1)K	ASDKPTLIC(24.25)C(24.25)K	10	2	2.0444	By matching	By matching	By matching	By MS/MS
C4M818;B1N3S8;B1N5J9	16;16;16	C4M818	C4M818	>tr|C4M818|C4M818_ENTHI Transketolase OS=Entamoeba histolytica OX=5759 GN=EHI_002160 PE=3 SV=1;>tr|B1N3S8|B1N3S8_ENTHI Transketolase, putative OS=Entamoeba histolytica OX=5759 GN=EHI_177870 PE=3 SV=1;>tr|B1N5J9|B1N5J9_ENTHI Transketolase, putative (Fragmen	1	74.1727	0.000527261	74.173	39.987	74.173	0	0		NaN	1	35.9081	0.00886389	39.848	1	57.0324	0.00192406	57.032	1	54.7223	0.00106025	63.216	1	74.1727	0.000527261	74.173	1	53.7511	0.0026105	53.751		1	C	MSLEERSIQTIRLLACEMINKAKSGHPGVPT	X;X;X;X;X;X;X;X;X;X;X;X;X;X;X;Carbamidomethyl (C);X;Oxidation (M);X;X;X;X;X;X;X;X;X;X;X;X;X	XXXXXXXXXXXXPPPPPPPPPXXXXXXXXXX	LLAC(1)EMINK	LLAC(74.17)EMINK	4	2	-0.90633	By matching	By MS/MS	By MS/MS	By MS/MS
Q1EPY2;B1N3T5	346;346	Q1EPY2	Q1EPY2	>tr|Q1EPY2|Q1EPY2_ENTHI EhVps45A OS=Entamoeba histolytica OX=5759 GN=EHI_160900 PE=3 SV=1;>tr|B1N3T5|B1N3T5_ENTHI Vacuolar protein sorting-associated protein 45, putative OS=Entamoeba histolytica OX=5759 GN=EHI_154290 PE=3 SV=1	1	74.6109	0.000215721	74.611	45.653	74.611					0	0		NaN					1	49.4481	0.00611214	49.448					1	74.6109	0.000215721	74.611		1	C	RRKMLDVSRLEQDIVCGSGRQELYQNVIQFF	X;X;X;X;X;X;X;X;X;X;X;X;X;X;X;Carbamidomethyl (C);X;X;X;X;X;X;X;X;X;X;X;X;X;X;X	XXXXXXXXXPPPPPPPPPPPXXXXXXXXXXX	LEQDIVC(1)GSGR	LEQDIVC(74.61)GSGR	7	2	-0.64772	By matching	By matching	By matching	By MS/MS
B1N3X3	37	B1N3X3	B1N3X3	>tr|B1N3X3|B1N3X3_ENTHI Uncharacterized protein OS=Entamoeba histolytica OX=5759 GN=EHI_117690 PE=4 SV=1	1	110.637	1.76272e-06	164.48	127.89	110.64	1	164.478	2.01548e-06	164.48	0	0		NaN	1	75.89	0.000433089	75.89	0	0		NaN	1	110.637	1.76272e-06	110.64	1	28.3838	0.0269283	28.384		1	C	DRNQYFVCEFHTPRKCQIENEEGIKAFLKSE	X;X;X;X;X;X;X;Carbamidomethyl (C);X;X;X;X;X;X;X;Carbamidomethyl (C);X;X;X;X;X;X;X;X;X;X;X;X;X;X;X	XXXXXXXXXXXXXXPPPPPPPPPPPXXXXXX	KC(1)QIENEEGIK	KC(110.64)QIENEEGIK	2	2	-0.3403	By MS/MS	By matching	By MS/MS	By matching
B1N3X3	29	B1N3X3	B1N3X3	>tr|B1N3X3|B1N3X3_ENTHI Uncharacterized protein OS=Entamoeba histolytica OX=5759 GN=EHI_117690 PE=4 SV=1	1	29.6158	9.10696e-05	78.705	72.045	29.616	1	78.7046	9.10696e-05	78.705					0	0		NaN					1	29.6158	0.0374651	29.616						1	C	SGNDNQKIDRNQYFVCEFHTPRKCQIENEEG	X;X;X;X;X;X;X;X;X;X;X;X;X;X;X;Carbamidomethyl (C);X;X;X;X;X;X;X;Carbamidomethyl (C);X;X;X;X;X;X;X	XXXXXXXXXXPPPPPPPPPPPPXXXXXXXXX	NQYFVC(1)EFHTPR	NQYFVC(29.62)EFHTPR	6	3	-0.44775	By MS/MS	By matching	By matching	By matching
B1N3X5	194	B1N3X5	B1N3X5	>tr|B1N3X5|B1N3X5_ENTHI Uncharacterized protein OS=Entamoeba histolytica OX=5759 GN=EHI_081750 PE=4 SV=1	0.5	0	0.042875	25.559	6.5807	25.559	0	0		NaN													0.5	0	0.042875	25.559							C	IVSNILNDFPKTKLICCWVEKSTCNNLIDLA	X;X;X;X;X;X;X;X;X;X;X;X;X;X;X;Carbamidomethyl (C);NEM;X;X;X;Propionamide_aa;X;X;X;X;X;X;X;X;X;X	XXXXXXXXXXXXXPPPPPPPPXXXXXXXXXX	LIC(0.5)C(0.5)WVEK	LIC(0)C(0)WVEK	3	2	0.90502	By matching	By matching	By matching	By matching
B1N3X5	195	B1N3X5	B1N3X5	>tr|B1N3X5|B1N3X5_ENTHI Uncharacterized protein OS=Entamoeba histolytica OX=5759 GN=EHI_081750 PE=4 SV=1	0.5	0	0.042875	25.559	6.5807	25.559	0	0		NaN													0.5	0	0.042875	25.559							C	VSNILNDFPKTKLICCWVEKSTCNNLIDLAH	X;X;X;X;X;X;X;X;X;X;X;X;X;X;X;X;X;X;X;X;X;X;X;X;X;X;X;X;X;X;X	XXXXXXXXXXXXXXXXXXXXXXXXXXXXXXX	LIC(0.5)C(0.5)WVEK	LIC(0)C(0)WVEK	4	2	0.90502	By matching	By matching	By matching	By matching
B1N403	18	B1N403	B1N403	>tr|B1N403|B1N403_ENTHI Uncharacterized protein OS=Entamoeba histolytica OX=5759 GN=EHI_161980 PE=4 SV=1	1	92.6333	2.38619e-05	92.633	72.879	92.633									1	92.6333	2.38619e-05	92.633					0	0		NaN						1	C	FLLFVSIVCAVKIPKCSIDGNSIYSYIPYSK	X;X;X;X;X;X;X;X;X;X;X;X;X;X;X;Carbamidomethyl (C);X;X;X;X;X;X;X;X;X;X;X;X;X;X;X	XXXXXXXXXXXXXXXPPPPPPPPPPPPPPPP	C(1)SIDGNSIYSYIPYSK	C(92.63)SIDGNSIYSYIPYSK	1	2	1.0147	By matching	By matching	By MS/MS	By matching
B1N403	97	B1N403	B1N403	>tr|B1N403|B1N403_ENTHI Uncharacterized protein OS=Entamoeba histolytica OX=5759 GN=EHI_161980 PE=4 SV=1	1	100.042	5.56925e-30	195.38	175.71	100.04	1	195.383	5.56925e-30	195.38	0	0		NaN	1	96.0959	1.2816e-05	96.096					1	100.042	2.2752e-09	109.14						1	C	DVLKKTITYQYTGESCGKENFKTTVVTRCGQ	X;X;X;X;X;X;X;X;X;X;X;X;X;X;X;Carbamidomethyl (C);X;X;X;X;X;X;X;X;X;X;X;X;X;X;X	XXXXXPPPPPPPPPPPPPPPPPXXXXXXXXX	TITYQYTGESC(1)GKENFK	TITYQYTGESC(100.04)GKENFK	11	2	0.48069	By MS/MS	By matching	By MS/MS	By matching
B1N416	99	B1N416	B1N416	>tr|B1N416|B1N416_ENTHI Uncharacterized protein OS=Entamoeba histolytica OX=5759 GN=EHI_056430 PE=3 SV=1	0.990616	20.2353	0.044534	22.538	6.9932	22.538																	0.990616	20.2353	0.044534	22.538						1	C	LRIVDMCPSNDENPKCKGDSTTFDIAENGFS	X;X;X;X;X;X;X;X;X;X;X;X;X;X;X;Carbamidomethyl (C);X;X;X;X;X;X;X;X;X;X;X;X;X;X;X	XXPPPPPPPPPPPPPPPXXXXXXXXXXXXXX	IVDMC(0.009)PSNDENPKC(0.991)K	IVDMC(-20.24)PSNDENPKC(20.24)K	14	3	0.64451	By matching	By matching	By matching	By matching
B1N424	510	B1N424	B1N424	>tr|B1N424|B1N424_ENTHI Adapter-related protein complex 3 (AP-3) subunit, putative OS=Entamoeba histolytica OX=5759 GN=EHI_083430 PE=3 SV=1	1	29.5767	0.0174112	29.577	12.652	29.577									1	29.5767	0.0174112	29.577														1	C	DILRILAKTFVEEDECVKQQVLTFAGKLYIT	X;X;X;X;X;X;X;X;X;X;X;X;X;X;X;Carbamidomethyl (C);X;X;X;X;X;X;X;X;X;X;X;X;X;X;X	XXXXXXXXPPPPPPPPPPPPPPPPPPPXXXX	TFVEEDEC(1)VKQQVLTFAGK	TFVEEDEC(29.58)VKQQVLTFAGK	8	3	-2.9744	By matching	By matching	By MS/MS	By matching
B1N437	411	B1N437	B1N437	>tr|B1N437|B1N437_ENTHI Uncharacterized protein (Fragment) OS=Entamoeba histolytica OX=5759 GN=EHI_112070 PE=4 SV=1	1	36.4245	0.032092	36.424	15.052	36.424	0	0		NaN	0	0		NaN	1	36.4245	0.032092	36.424	0	0		NaN	0	0		NaN	0	0		NaN		1	C	QMISYLKNSYFQKKFCIFPSVSKEITTFFDL	X;X;X;X;X;X;X;X;X;X;X;X;X;Propionamide_aa;X;Carbamidomethyl (C);X;X;X;X;X;X;X;X;X;X;X;X;X;X;X	XXXXXXXXXXXXXPPPPPPPPPPXXXXXXXX	KFC(1)IFPSVSK	KFC(36.42)IFPSVSK	3	3	3.4129	By matching	By matching	By MS/MS	By matching
B1N437	962	B1N437	B1N437	>tr|B1N437|B1N437_ENTHI Uncharacterized protein (Fragment) OS=Entamoeba histolytica OX=5759 GN=EHI_112070 PE=4 SV=1	1	30.4196	0.0453161	30.42	6.2209	30.42									1	30.4196	0.0453161	30.42														1	C	EENGLKNYLIIIRYYCLLLKYNYINENCNII	X;X;X;X;X;X;X;X;X;X;X;X;X;X;X;Carbamidomethyl (C);X;X;X;X;X;X;X;X;X;X;X;X;X;X;X	XXXXXXXXXXXXXPPPPPPPXXXXXXXXXXX	YYC(1)LLLK	YYC(30.42)LLLK	3	2	-0.084609	By matching	By matching	By MS/MS	By matching
B1N462	518	B1N462	B1N462	>tr|B1N462|B1N462_ENTHI Ras-GAP domain-containing protein OS=Entamoeba histolytica OX=5759 GN=EHI_002150 PE=4 SV=1	1	47.7058	0.00057534	72.607	59.57	47.706	1	52.549	0.0033222	52.549	0	0		NaN	1	72.607	0.00057534	72.607	1	27.8642	0.0402729	27.864	1	47.7058	0.00618963	47.706	1	72.607	0.00057534	72.607		1	C	FTGVYEAQCTFRGFNCNQSVRWAIENAKEHD	X;X;X;X;X;X;X;X;X;X;X;X;X;X;X;Carbamidomethyl (C);X;X;X;X;X;X;X;X;X;X;X;X;X;X;X	XXXXXXXXXXXXPPPPPPPPPXXXXXXXXXX	GFNC(1)NQSVR	GFNC(47.71)NQSVR	4	2	-0.89345	By MS/MS	By matching	By MS/MS	By MS/MS
B1N462	223	B1N462	B1N462	>tr|B1N462|B1N462_ENTHI Ras-GAP domain-containing protein OS=Entamoeba histolytica OX=5759 GN=EHI_002150 PE=4 SV=1	1	96.7446	7.21116e-06	96.745	71.403	96.745	1	96.7446	7.21116e-06	96.745																						1	C	SFYIQALMNPEKYGLCSNEQITLKNKRNLAL	X;X;X;X;X;X;X;X;X;X;X;X;X;X;X;Carbamidomethyl (C);X;X;X;X;X;X;X;X;X;X;X;X;X;X;X	XXXXXXXXXXXXPPPPPPPPPPPPXXXXXXX	YGLC(1)SNEQITLK	YGLC(96.74)SNEQITLK	4	2	-0.051895	By MS/MS	By matching	By matching	By matching
B1N494	691	B1N494	B1N494	>tr|B1N494|B1N494_ENTHI Uncharacterized protein OS=Entamoeba histolytica OX=5759 GN=EHI_185450 PE=4 SV=1	1	48.1575	7.53166e-06	130.22	69.785	48.157	1	130.221	0.000214185	130.22					1	84.7431	7.53166e-06	84.743	1	48.7942	0.0091927	48.794	1	48.1575	0.0097035	48.157						1	C	EPTNSIDSKYELTQVCRIYVALVPKGYTITE	X;X;X;X;X;X;X;X;X;X;X;X;X;X;X;Carbamidomethyl (C);X;X;X;X;X;X;X;X;X;X;X;X;X;X;X	PPPPPPPPPPPPPPPPPXXXXXXXXXXXXXX	YELTQVC(1)R	YELTQVC(48.16)R	7	2	-0.83143	By MS/MS	By matching	By MS/MS	By MS/MS
B1N494;C4LXD1	707;1595	B1N494;C4LXD1	C4LXD1	>tr|B1N494|B1N494_ENTHI Uncharacterized protein OS=Entamoeba histolytica OX=5759 GN=EHI_185450 PE=4 SV=1;>tr|C4LXD1|C4LXD1_ENTHI Uncharacterized protein OS=Entamoeba histolytica OX=5759 GN=EHI_098510 PE=4 SV=1	1	83.9477	0.000219346	84.615	64.094	83.948	1	84.6146	0.000219346	84.615	0	0		NaN	0	0		NaN	0	0		NaN	1	83.9477	0.000227088	83.948	0	0		NaN		1	C	RIYVALVPKGYTITECPKDPCGTNEAGIFSQ;RIYVALVPKGYTITECPKDPCGTNEAGISSQ	X;X;X;X;X;X;X;X;X;X;X;X;X;X;X;Carbamidomethyl (C);X;X;X;X;X;X;X;X;X;X;X;X;X;X;X	XXXXXXXXXPPPPPPPPPXXXXXXXXXXXXX	GYTITEC(1)PK	GYTITEC(83.95)PK	7	2	-0.82616	By MS/MS	By matching	By matching	By matching
B1N4A4;C4M5L3	295;352	B1N4A4	B1N4A4	>tr|B1N4A4|B1N4A4_ENTHI Alpha-1,3/1,6-mannosyltransferase ALG2 OS=Entamoeba histolytica OX=5759 GN=EHI_162230 PE=3 SV=1;>tr|C4M5L3|C4M5L3_ENTHI Alpha-1,3/1,6-mannosyltransferase ALG2 OS=Entamoeba histolytica OX=5759 GN=EHI_001990 PE=3 SV=1	1	51.4359	0.00398119	51.436	35.997	51.436									1	50.1076	0.00476765	50.108					1	51.4359	0.00398119	51.436	0	0		NaN		1	C	LTGLLCDGSKEGFAACISRLCHDNNLRQKLK	X;X;X;X;X;X;X;X;X;X;X;X;X;X;X;Carbamidomethyl (C);X;X;X;X;Carbamidomethyl (C);NEM;X;X;X;X;X;X;X;X;X;X	XXXXXXXXXXPPPPPPPPPXXXXXXXXXXXX	EGFAAC(1)ISR	EGFAAC(51.44)ISR	6	2	1.2595	By matching	By matching	By MS/MS	By matching
B1N4A4;C4M5L3	300;357	B1N4A4	B1N4A4	>tr|B1N4A4|B1N4A4_ENTHI Alpha-1,3/1,6-mannosyltransferase ALG2 OS=Entamoeba histolytica OX=5759 GN=EHI_162230 PE=3 SV=1;>tr|C4M5L3|C4M5L3_ENTHI Alpha-1,3/1,6-mannosyltransferase ALG2 OS=Entamoeba histolytica OX=5759 GN=EHI_001990 PE=3 SV=1	1	58.2859	0.00100141	89.698	57.556	58.286	1	89.698	0.00100141	89.698					1	43.2183	0.0136663	43.218	0	0		NaN	1	58.2859	0.00395082	58.286						1	C	CDGSKEGFAACISRLCHDNNLRQKLKLNAKK	X;X;X;X;X;X;X;X;X;X;Carbamidomethyl (C);X;X;X;X;Carbamidomethyl (C);X;X;X;X;X;X;X;X;X;X;X;X;X;X;X	XXXXXXXXXXXXXXPPPPPPPPXXXXXXXXX	LC(1)HDNNLR	LC(58.29)HDNNLR	2	2	0.94809	By MS/MS	By matching	By MS/MS	By matching
B1N4B4;C4LUD2	98;98	B1N4B4	B1N4B4	>tr|B1N4B4|B1N4B4_ENTHI RhoGAP domain containing protein OS=Entamoeba histolytica OX=5759 GN=EHI_056130 PE=4 SV=1;>tr|C4LUD2|C4LUD2_ENTHI RhoGAP domain containing protein OS=Entamoeba histolytica OX=5759 GN=EHI_049300 PE=4 SV=1	1	27.0013	0.0448368	27.001	10.075	27.001	1	27.0013	0.0448368	27.001									0	0		NaN											C	HAMVMAAKRRALLTNCNKRYGKKIEILESCR	X;X;X;X;X;X;X;X;X;X;X;X;X;X;X;Carbamidomethyl (C);X;X;X;X;X;X;X;X;X;X;X;X;X;Carbamidomethyl (C);X	XXXXXXXXXXPPPPPPPPPXXXXXXXXXXXX	ALLTNC(1)NKR	ALLTNC(27)NKR	6	3	3.7154	By matching	By matching	By matching	By matching
B1N4B4;C4LUD2	112;112	B1N4B4	B1N4B4	>tr|B1N4B4|B1N4B4_ENTHI RhoGAP domain containing protein OS=Entamoeba histolytica OX=5759 GN=EHI_056130 PE=4 SV=1;>tr|C4LUD2|C4LUD2_ENTHI RhoGAP domain containing protein OS=Entamoeba histolytica OX=5759 GN=EHI_049300 PE=4 SV=1	1	21.0322	0.0434712	21.032	12.074	21.032									1	21.0322	0.0434712	21.032					0	0		NaN						1	C	NCNKRYGKKIEILESCRRPTIGFSDDLIQQS	X;Carbamidomethyl (C);X;X;X;X;X;X;X;X;X;X;X;X;X;Carbamidomethyl (C);X;X;X;X;X;X;X;X;X;X;X;X;X;X;X	XXXXXXXXPPPPPPPPPXXXXXXXXXXXXXX	KIEILESC(1)R	KIEILESC(21.03)R	8	3	-3.7507	By matching	By matching	By MS/MS	By matching
B1N4D4	387	B1N4D4	B1N4D4	>tr|B1N4D4|B1N4D4_ENTHI PH domain containing protein OS=Entamoeba histolytica OX=5759 GN=EHI_192960 PE=4 SV=1	1	46.6404	0.00481242	46.64	32.18	46.64													1	46.6404	0.00481242	46.64										1	C	QKIVSKTIKFARPTECLPKVLPFPGHIETKG	X;X;X;X;X;X;X;X;X;X;X;X;X;X;X;Carbamidomethyl (C);X;X;X;X;X;X;X;X;X;X;X;X;X;X;X	XXXXXXXXXPPPPPPPPPPXXXXXXXXXXXX	FARPTEC(1)LPK	FARPTEC(46.64)LPK	7	3	-1.7165	By matching	By matching	By matching	By MS/MS
B1N4D4	159	B1N4D4	B1N4D4	>tr|B1N4D4|B1N4D4_ENTHI PH domain containing protein OS=Entamoeba histolytica OX=5759 GN=EHI_192960 PE=4 SV=1	1	73.9176	4.96106e-05	73.918	51.866	73.918									1	73.9176	4.96106e-05	73.918														1	C	AKNIIAILGEDNHGECQSIRMHCKERGIHVA	X;X;X;X;X;X;X;X;X;X;X;X;X;X;X;Carbamidomethyl (C);X;X;X;X;X;X;X;X;X;X;X;X;X;X;X	XXPPPPPPPPPPPPPPPPPPXXXXXXXXXXX	NIIAILGEDNHGEC(1)QSIR	NIIAILGEDNHGEC(73.92)QSIR	14	3	2.0578	By matching	By matching	By MS/MS	By matching
B1N4G5	39	B1N4G5	B1N4G5	>tr|B1N4G5|B1N4G5_ENTHI Uncharacterized protein OS=Entamoeba histolytica OX=5759 GN=EHI_107930 PE=4 SV=1	1	63.6908	0.000259326	63.691	55.349	63.691	0	0		NaN													1	63.6908	0.000259326	63.691						1	C	TKGERAEFTSYELDQCFESSKEGNYIKVTKM	X;X;X;X;X;X;X;X;X;X;X;X;X;X;X;Carbamidomethyl (C);X;X;X;X;X;X;X;X;X;X;X;X;X;X;X	XXXXXPPPPPPPPPPPPPPPPXXXXXXXXXX	AEFTSYELDQC(1)FESSK	AEFTSYELDQC(63.69)FESSK	11	2	-0.72411	By matching	By matching	By matching	By matching
B1N4G5	145	B1N4G5	B1N4G5	>tr|B1N4G5|B1N4G5_ENTHI Uncharacterized protein OS=Entamoeba histolytica OX=5759 GN=EHI_107930 PE=4 SV=1	1	80.8149	4.43538e-05	80.815	46.847	80.815	1	59.6797	0.000755725	59.68					1	80.8149	4.43538e-05	80.815														1	C	VEDGKLVTYEYKNDKCEDKIDNSKVIIVEVD	X;X;X;X;X;X;X;X;X;X;X;X;X;X;X;Carbamidomethyl (C);X;X;X;X;X;X;X;X;X;X;X;X;X;X;X	XXXXXXXXXXXXPPPPPPPPPPPPXXXXXXX	NDKC(1)EDKIDNSK	NDKC(80.81)EDKIDNSK	4	3	-3.5509	By MS/MS	By matching	By MS/MS	By matching
B1N4G5	119	B1N4G5	B1N4G5	>tr|B1N4G5|B1N4G5_ENTHI Uncharacterized protein OS=Entamoeba histolytica OX=5759 GN=EHI_107930 PE=4 SV=1	1	69.3689	6.30981e-05	76.158	68.292	69.369	1	76.1579	6.30981e-05	76.158					1	69.3689	8.13902e-05	69.369					0	0		NaN						1	C	KRKDTFEKSYINFDICMNQDGFKKYSVEDGK	X;X;X;X;X;X;X;X;X;X;X;X;X;X;X;Carbamidomethyl (C);X;X;X;X;X;X;X;X;X;X;X;X;X;X;X	XXXXXXXXPPPPPPPPPPPPPPPPXXXXXXX	SYINFDIC(1)MNQDGFKK	SYINFDIC(69.37)MNQDGFKK	8	3	2.489	By MS/MS	By matching	By MS/MS	By matching
B1N4G5	162	B1N4G5	B1N4G5	>tr|B1N4G5|B1N4G5_ENTHI Uncharacterized protein OS=Entamoeba histolytica OX=5759 GN=EHI_107930 PE=4 SV=1	1	120.9	4.79698e-16	146.3	132.88	120.9									1	146.296	4.79698e-16	146.3					1	120.9	1.0125e-09	120.9						1	C	DKIDNSKVIIVEVDKCISDDSSKSSKYYDNS	X;X;X;X;X;X;X;X;X;X;X;X;X;X;X;Carbamidomethyl (C);X;X;X;X;X;X;X;X;X;X;X;X;X;X;X	XXXXXXXPPPPPPPPPPPPPPPPXXXXXXXX	VIIVEVDKC(1)ISDDSSK	VIIVEVDKC(120.9)ISDDSSK	9	2	1.5216	By matching	By matching	By MS/MS	By matching
B1N4G5	103	B1N4G5	B1N4G5	>tr|B1N4G5|B1N4G5_ENTHI Uncharacterized protein OS=Entamoeba histolytica OX=5759 GN=EHI_107930 PE=4 SV=1	1	115.714	0.000143425	115.71	78.621	115.71	1	79.4891	0.000364004	79.489					1	102.067	0.00020695	102.07					1	115.714	0.000143425	115.71	0	0		NaN		1	C	PSYNLEVKYDLSGTECKRKDTFEKSYINFDI	X;X;X;X;X;X;X;X;X;X;X;X;X;X;X;Carbamidomethyl (C);X;X;X;X;X;X;X;X;X;X;X;X;X;X;X	XXXXXXXXPPPPPPPPPXXXXXXXXXXXXXX	YDLSGTEC(1)K	YDLSGTEC(115.71)K	8	2	0.16146	By MS/MS	By matching	By MS/MS	By matching
B1N4H0	479	B1N4H0	B1N4H0	>tr|B1N4H0|B1N4H0_ENTHI Uncharacterized protein OS=Entamoeba histolytica OX=5759 GN=EHI_003040 PE=4 SV=1	1	42.3169	0.00305457	42.317	19.225	42.317													1	42.3169	0.00305457	42.317										2	C	NEILELIHKKVGLRTCLETIINNCHLSDKKG	X;X;X;X;X;X;X;X;X;X;X;X;X;X;X;Carbamidomethyl (C);X;X;X;X;X;X;X;Carbamidomethyl (C);Propionamide_aa;X;X;X;X;X;X	XXXXXXXXXXXXXXPPPPPPPPPPPPPPPXX	TC(1)LETIINNC(1)HLSDK	TC(42.32)LETIINNC(42.32)HLSDK	2	2	1.9203	By matching	By matching	By matching	By MS/MS
B1N4H0	487	B1N4H0	B1N4H0	>tr|B1N4H0|B1N4H0_ENTHI Uncharacterized protein OS=Entamoeba histolytica OX=5759 GN=EHI_003040 PE=4 SV=1	1	42.3169	0.00305457	42.317	19.225	42.317													1	42.3169	0.00305457	42.317										2	C	KKVGLRTCLETIINNCHLSDKKGYSSFMSFK	X;X;X;X;X;X;X;Carbamidomethyl (C);X;X;X;X;X;X;X;Carbamidomethyl (C);Propionamide_aa;X;X;X;X;X;X;X;X;X;X;X;X;X;X	XXXXXXPPPPPPPPPPPPPPPXXXXXXXXXX	TC(1)LETIINNC(1)HLSDK	TC(42.32)LETIINNC(42.32)HLSDK	10	2	1.9203	By matching	By matching	By matching	By MS/MS
B1N4H2;C4M844	131;131	B1N4H2	B1N4H2	>tr|B1N4H2|B1N4H2_ENTHI GPN-loop GTPase 2 OS=Entamoeba histolytica OX=5759 GN=EHI_022300 PE=3 SV=1;>tr|C4M844|C4M844_ENTHI GPN-loop GTPase 2 OS=Entamoeba histolytica OX=5759 GN=EHI_108650 PE=3 SV=1	1	45.8819	0.0111693	50.855	42.033	45.882									1	50.855	0.0111693	50.855					1	45.8819	0.0159472	45.882						1	C	HPTLPTILHRLQQINCRLTAVHLIDSIHIGN	X;X;X;X;X;X;X;X;X;X;X;X;X;X;X;Carbamidomethyl (C);X;X;X;X;X;X;X;X;X;X;X;X;X;X;X	XXXXXXXXXXPPPPPPPXXXXXXXXXXXXXX	LQQINC(1)R	LQQINC(45.88)R	6	2	-0.95026	By matching	By matching	By MS/MS	By matching
B1N4I3;Q24858	792;777	B1N4I3;Q24858	Q24858	>tr|B1N4I3|B1N4I3_ENTHI Proton-translocating NAD(P)(+) transhydrogenase OS=Entamoeba histolytica OX=5759 GN=EHI_055400 PE=4 SV=1;>tr|Q24858|Q24858_ENTHI Proton-translocating NAD(P)(+) transhydrogenase OS=Entamoeba histolytica OX=5759 GN=EHI_014030 PE=4 SV=	1	26.6826	5.42975e-76	217.17	205.57	26.683	1	26.6826	1.66928e-41	160.45					1	187.891	2.19847e-52	187.89	1	41.5514	7.56708e-05	41.551	1	217.172	5.42975e-76	217.17	1	32.8222	0.0039712	32.822		1	C	RKAAKEQAESVGAEFCTVSVDEDAENKFGYA	X;X;X;X;X;X;X;X;X;X;X;X;X;X;X;Carbamidomethyl (C);X;X;X;X;X;X;X;X;X;X;Propionamide_aa;X;X;X;X	XXPPPPPPPPPPPPPPPPPPPPPPPPPPPPP	EQAESVGAEFC(1)TVSVDEDAENKFGYANAASQR	EQAESVGAEFC(26.68)TVSVDEDAENKFGYANAASQR	11	3	-0.88516	By MS/MS	By matching	By MS/MS	By MS/MS
B1N4I3;Q24858	706;691	B1N4I3;Q24858	Q24858	>tr|B1N4I3|B1N4I3_ENTHI Proton-translocating NAD(P)(+) transhydrogenase OS=Entamoeba histolytica OX=5759 GN=EHI_055400 PE=4 SV=1;>tr|Q24858|Q24858_ENTHI Proton-translocating NAD(P)(+) transhydrogenase OS=Entamoeba histolytica OX=5759 GN=EHI_014030 PE=4 SV=	1	166.92	3.32168e-24	168.41	158.61	166.92	1	100.577	1.345e-06	100.58	1	73.4977	3.78202e-05	95.236	1	130.295	3.51336e-24	166.92	1	40.4932	3.32168e-24	168.41	1	166.92	4.29727e-24	166.92	1	57.1479	7.94085e-06	97.235		1	C	NVISMDCVPRLSKAQCMDALSSQNNLAGYRC	X;X;X;X;Oxidation (M);X;Carbamidomethyl (C);NEM;NEM H2O;X;X;X;X;X;X;X;X;Carbamidomethyl (C);Oxidation (M);X;X;X;X;X;X;X;X;X;X;X;X;X;Carbamidomethyl (C);NEM	XXXXXXXXXXXXXPPPPPPPPPPPPPPPPPX	AQC(1)MDALSSQNNLAGYR	AQC(166.92)MDALSSQNNLAGYR	3	2	1.7314	By MS/MS	By MS/MS	By MS/MS	By MS/MS
B1N4I3;Q24858	721;706	B1N4I3;Q24858	Q24858	>tr|B1N4I3|B1N4I3_ENTHI Proton-translocating NAD(P)(+) transhydrogenase OS=Entamoeba histolytica OX=5759 GN=EHI_055400 PE=4 SV=1;>tr|Q24858|Q24858_ENTHI Proton-translocating NAD(P)(+) transhydrogenase OS=Entamoeba histolytica OX=5759 GN=EHI_014030 PE=4 SV=	1	68.5357	0.00019288	103.91	78.08	68.536	1	75.7382	0.00159834	75.738	1	65.2463	0.00269771	65.246	1	86.189	0.00019288	103.91	1	69.9045	0.00192876	69.905	1	68.5357	0.00029454	75.692	1	73.2482	0.00173937	73.248		1	C	CMDALSSQNNLAGYRCVIEASNKFGRLLMGQ	Carbamidomethyl (C);Oxidation (M);X;X;X;X;X;X;X;X;X;X;X;X;X;Carbamidomethyl (C);X;X;X;X;X;X;X;X;X;X;X;X;Oxidation (M);X;X	XXXXXXXXXXXXXXXPPPPPPPPPPPXXXXX	C(1)VIEASNKFGR	C(68.54)VIEASNKFGR	1	3	0.31203	By MS/MS	By MS/MS	By MS/MS	By MS/MS
B1N4I3;Q24858	697;682	B1N4I3;Q24858	Q24858	>tr|B1N4I3|B1N4I3_ENTHI Proton-translocating NAD(P)(+) transhydrogenase OS=Entamoeba histolytica OX=5759 GN=EHI_055400 PE=4 SV=1;>tr|Q24858|Q24858_ENTHI Proton-translocating NAD(P)(+) transhydrogenase OS=Entamoeba histolytica OX=5759 GN=EHI_014030 PE=4 SV=	1	52.5758	4.58139e-08	119.74	106.15	52.576	1	98.1049	3.49205e-06	98.105	1	108.564	3.04221e-07	108.56	1	52.5758	7.84644e-07	100.04	1	70.0893	0.000205772	70.089	1	52.5758	4.58139e-08	119.74	1	98.1049	3.49205e-06	98.105		1	C	LDLSVQKGINVISMDCVPRLSKAQCMDALSS	X;X;X;X;X;X;X;X;X;X;X;X;X;Oxidation (M);X;Carbamidomethyl (C);X;X;X;X;X;X;X;X;Carbamidomethyl (C);Oxidation (M);X;X;X;X;X	XXXXXXXPPPPPPPPPPPPXXXXXXXXXXXX	GINVISMDC(1)VPR	GINVISMDC(52.58)VPR	9	2	-0.39647	By MS/MS	By MS/MS	By MS/MS	By MS/MS
B1N4I3;Q24858	623;608	B1N4I3;Q24858	Q24858	>tr|B1N4I3|B1N4I3_ENTHI Proton-translocating NAD(P)(+) transhydrogenase OS=Entamoeba histolytica OX=5759 GN=EHI_055400 PE=4 SV=1;>tr|Q24858|Q24858_ENTHI Proton-translocating NAD(P)(+) transhydrogenase OS=Entamoeba histolytica OX=5759 GN=EHI_014030 PE=4 SV=	1	61.0387	7.6655e-06	61.039	55.919	61.039									1	61.0387	7.6655e-06	61.039														2	C	GYGIYVESGAGLLSSCTDEDYRSVGCRIAET	X;X;X;X;X;X;X;X;X;X;X;X;X;X;X;Carbamidomethyl (C);X;X;X;X;X;X;X;X;X;Carbamidomethyl (C);X;X;X;X;X	PPPPPPPPPPPPPPPPPPPPPPPPPPPXXXX	GYGIYVESGAGLLSSC(1)TDEDYRSVGC(1)R	GYGIYVESGAGLLSSC(61.04)TDEDYRSVGC(61.04)R	16	3	-1.811	By matching	By matching	By MS/MS	By matching
B1N4I3;Q24858	633;618	B1N4I3;Q24858	Q24858	>tr|B1N4I3|B1N4I3_ENTHI Proton-translocating NAD(P)(+) transhydrogenase OS=Entamoeba histolytica OX=5759 GN=EHI_055400 PE=4 SV=1;>tr|Q24858|Q24858_ENTHI Proton-translocating NAD(P)(+) transhydrogenase OS=Entamoeba histolytica OX=5759 GN=EHI_014030 PE=4 SV=	1	61.0387	7.6655e-06	61.039	55.919	61.039									1	61.0387	7.6655e-06	61.039														2	C	GLLSSCTDEDYRSVGCRIAETTEELYEKSNI	X;X;X;X;X;Carbamidomethyl (C);X;X;X;X;X;X;X;X;X;Carbamidomethyl (C);X;X;X;X;X;X;X;X;X;X;X;X;X;X;X	PPPPPPPPPPPPPPPPPXXXXXXXXXXXXXX	GYGIYVESGAGLLSSC(1)TDEDYRSVGC(1)R	GYGIYVESGAGLLSSC(61.04)TDEDYRSVGC(61.04)R	26	3	-1.811	By matching	By matching	By MS/MS	By matching
B1N4I3;Q24858	650;635	B1N4I3;Q24858	Q24858	>tr|B1N4I3|B1N4I3_ENTHI Proton-translocating NAD(P)(+) transhydrogenase OS=Entamoeba histolytica OX=5759 GN=EHI_055400 PE=4 SV=1;>tr|Q24858|Q24858_ENTHI Proton-translocating NAD(P)(+) transhydrogenase OS=Entamoeba histolytica OX=5759 GN=EHI_014030 PE=4 SV=	1	166.476	6.88573e-54	246.95	216.88	166.48					1	54.2806	0.000411252	54.281	1	246.955	6.88573e-54	246.95	0	0		NaN	1	166.476	1.31873e-23	166.48	0	0		NaN		1	C	IAETTEELYEKSNIICKVNPPSEEEINKMRQ	X;X;X;X;X;X;X;X;X;X;X;X;X;X;X;Carbamidomethyl (C);X;X;X;X;X;X;X;X;X;X;X;X;Oxidation (M);X;X	PPPPPPPPPPPPPPPPPXXXXXXXXXXXXXX	IAETTEELYEKSNIIC(1)K	IAETTEELYEKSNIIC(166.48)K	16	2	-0.3184	By matching	By MS/MS	By MS/MS	By matching
B1N4I3;Q24858	872;857	B1N4I3;Q24858	Q24858	>tr|B1N4I3|B1N4I3_ENTHI Proton-translocating NAD(P)(+) transhydrogenase OS=Entamoeba histolytica OX=5759 GN=EHI_055400 PE=4 SV=1;>tr|Q24858|Q24858_ENTHI Proton-translocating NAD(P)(+) transhydrogenase OS=Entamoeba histolytica OX=5759 GN=EHI_014030 PE=4 SV=	1	86.6367	2.40555e-06	86.637	62.212	86.637					1	84.5811	2.40555e-06	84.581					0	0		NaN					1	86.6367	2.40999e-06	86.637		1	C	IGSVIVDLAAANGGNCEVTRSGETYLYDNRI	X;X;X;X;X;X;X;X;X;X;X;X;X;X;X;Carbamidomethyl (C);X;X;X;X;X;X;X;X;X;X;X;X;X;X;X	PPPPPPPPPPPPPPPPPPPPXXXXXXXXXXX	IGSVIVDLAAANGGNC(1)EVTR	IGSVIVDLAAANGGNC(86.64)EVTR	16	2	-0.96513	By matching	By MS/MS	By matching	By matching
B1N4I3;Q24858	530;515	B1N4I3;Q24858	Q24858	>tr|B1N4I3|B1N4I3_ENTHI Proton-translocating NAD(P)(+) transhydrogenase OS=Entamoeba histolytica OX=5759 GN=EHI_055400 PE=4 SV=1;>tr|Q24858|Q24858_ENTHI Proton-translocating NAD(P)(+) transhydrogenase OS=Entamoeba histolytica OX=5759 GN=EHI_014030 PE=4 SV=	1	24.1213	0.00631729	81.296	39.794	24.121	1	81.2963	0.00631729	81.296	1	31.3785	0.0333313	31.379	1	41.6312	0.0116065	41.631	1	38.5498	0.0423038	38.55	1	24.1213	0.043317	24.121	1	60.9103	0.0076374	60.91		1	C	NPLFFYSNTRMFLSDCKKGFEELNEEIKKLT;NPLFFYSNTRMFLSDCKKGFEELNSELKRLM	X;X;X;X;X;X;X;X;X;X;Oxidation (M);X;X;X;X;Carbamidomethyl (C);X;X;X;X;X;X;X;X;X;X;X;X;X;X;X	XXXXXXXXXXPPPPPPPPXXXXXXXXXXXXX	MFLSDC(1)KK	MFLSDC(24.12)KK	6	3	-0.68866	By MS/MS	By MS/MS	By MS/MS	By MS/MS
B1N4I3;Q24858	919;904	B1N4I3;Q24858	Q24858	>tr|B1N4I3|B1N4I3_ENTHI Proton-translocating NAD(P)(+) transhydrogenase OS=Entamoeba histolytica OX=5759 GN=EHI_055400 PE=4 SV=1;>tr|Q24858|Q24858_ENTHI Proton-translocating NAD(P)(+) transhydrogenase OS=Entamoeba histolytica OX=5759 GN=EHI_014030 PE=4 SV=	1	117.232	1.04411e-12	117.23	102.66	117.23	1	80.2359	2.38154e-06	80.236					1	117.232	1.04411e-12	117.23														1	C	SQLYSQNIFNFLNLICKKASDFTIKLEEPIV	X;X;X;X;X;X;X;X;X;X;X;X;X;X;X;Carbamidomethyl (C);X;X;X;X;X;X;X;X;X;X;X;X;X;X;X	PPPPPPPPPPPPPPPPPXXXXXXXXXXXXXX	MSPQASQLYSQNIFNFLNLIC(1)K	MSPQASQLYSQNIFNFLNLIC(117.23)K	21	3	-0.63979	By MS/MS	By matching	By MS/MS	By matching
B1N4I3;Q24858	601;586	B1N4I3;Q24858	Q24858	>tr|B1N4I3|B1N4I3_ENTHI Proton-translocating NAD(P)(+) transhydrogenase OS=Entamoeba histolytica OX=5759 GN=EHI_055400 PE=4 SV=1;>tr|Q24858|Q24858_ENTHI Proton-translocating NAD(P)(+) transhydrogenase OS=Entamoeba histolytica OX=5759 GN=EHI_014030 PE=4 SV=	1	50.1076	0.000277916	76.228	65.76	50.108	1	76.2278	0.000277916	76.228	1	73.4995	0.000332081	73.499	1	76.2278	0.000277916	76.228	1	63.6242	0.000791159	63.624	1	50.1076	0.000630991	66.056	1	56.4044	0.00126675	56.404		1	C	KENVPEKMVAMVPSVCKQLRSRGYGIYVESG	X;X;X;X;X;X;X;Oxidation (M);X;X;X;X;X;X;X;Carbamidomethyl (C);X;X;X;X;X;X;X;X;X;X;X;X;X;X;X	XXXXXXXPPPPPPPPPPXXXXXXXXXXXXXX	MVAMVPSVC(1)K	MVAMVPSVC(50.11)K	9	2	-0.70866	By MS/MS	By MS/MS	By MS/MS	By MS/MS
B1N4I3;Q24858	940;925	B1N4I3;Q24858	Q24858	>tr|B1N4I3|B1N4I3_ENTHI Proton-translocating NAD(P)(+) transhydrogenase OS=Entamoeba histolytica OX=5759 GN=EHI_055400 PE=4 SV=1;>tr|Q24858|Q24858_ENTHI Proton-translocating NAD(P)(+) transhydrogenase OS=Entamoeba histolytica OX=5759 GN=EHI_014030 PE=4 SV=	1	65.6266	4.71429e-05	92.239	76.979	65.627	1	72.8477	0.000345021	72.848	1	62.0047	0.000734058	62.005	1	74.5333	4.71429e-05	92.239	1	22.4786	0.00658592	40.727	1	65.6266	0.000659258	65.627	1	73.8853	0.000324422	73.885		1	C	FTIKLEEPIVRQMVVCSAGQKMWPAPQIQVV	X;X;X;X;X;X;X;X;X;X;X;X;Oxidation (M);X;X;Carbamidomethyl (C);X;X;X;X;X;Oxidation (M);X;X;X;X;X;X;X;X;X	XXXXXXXXXXXPPPPPPPPPPXXXXXXXXXX	QMVVC(1)SAGQK	QMVVC(65.63)SAGQK	5	2	-2.5519	By MS/MS	By MS/MS	By MS/MS	By MS/MS
B1N4I3;Q24858	499;484	B1N4I3;Q24858	Q24858	>tr|B1N4I3|B1N4I3_ENTHI Proton-translocating NAD(P)(+) transhydrogenase OS=Entamoeba histolytica OX=5759 GN=EHI_055400 PE=4 SV=1;>tr|Q24858|Q24858_ENTHI Proton-translocating NAD(P)(+) transhydrogenase OS=Entamoeba histolytica OX=5759 GN=EHI_014030 PE=4 SV=	1	52.6831	0.00690579	77.748	61.595	52.683	1	77.7484	0.00690579	77.748	1	64.7764	0.0112234	64.776	1	62.7143	0.0123584	62.714	1	62.7143	0.0123584	62.714	1	71.9493	0.00815124	71.949	1	52.6831	0.0214356	52.683		1	C	PLAGMPIIDVYKAKVCVVNKRSLNQGYAAVD	X;X;X;X;X;X;X;X;X;X;X;X;X;X;X;Carbamidomethyl (C);X;X;X;NEM H2O;X;X;X;X;X;X;X;X;X;X;X	XXXXXXXXXXXXXXPPPPPPPXXXXXXXXXX	VC(1)VVNKR	VC(52.68)VVNKR	2	2	2.4489	By MS/MS	By MS/MS	By MS/MS	By MS/MS
B1N4K0	76	B1N4K0	B1N4K0	>tr|B1N4K0|B1N4K0_ENTHI Glucosidase 2 subunit beta OS=Entamoeba histolytica OX=5759 GN=EHI_135420 PE=4 SV=1	1	76.0486	3.72306e-25	143.91	139.5	76.049	1	118.366	1.9291e-14	118.37					1	143.911	3.72306e-25	143.91					1	76.0486	5.21927e-07	76.049						5	C	ADAVEIESRFVGDSICDCCDGSDEKEGLCPN	X;X;X;X;X;X;X;X;X;X;X;X;X;X;X;Carbamidomethyl (C);X;Carbamidomethyl (C);Carbamidomethyl (C);X;X;X;X;X;X;X;X;X;Carbamidomethyl (C);X;X	XXXXXXXXXPPPPPPPPPPPPPPPPPPPPPP	FVGDSIC(1)DC(1)C(1)DGSDEKEGLC(1)PNVC(1)K	FVGDSIC(76.05)DC(76.05)C(76.05)DGSDEKEGLC(76.05)PNVC(76.05)K	7	3	-1.0009	By MS/MS	By matching	By MS/MS	By matching
B1N4K0	78	B1N4K0	B1N4K0	>tr|B1N4K0|B1N4K0_ENTHI Glucosidase 2 subunit beta OS=Entamoeba histolytica OX=5759 GN=EHI_135420 PE=4 SV=1	1	76.0486	3.72306e-25	143.91	139.5	76.049	1	118.366	1.9291e-14	118.37					1	143.911	3.72306e-25	143.91					1	76.0486	5.21927e-07	76.049						5	C	AVEIESRFVGDSICDCCDGSDEKEGLCPNVC	X;X;X;X;X;X;X;X;X;X;X;X;X;Carbamidomethyl (C);X;Carbamidomethyl (C);Carbamidomethyl (C);X;X;X;X;X;X;X;X;X;Carbamidomethyl (C);X;X;X;Carbamidomethyl (C)	XXXXXXXPPPPPPPPPPPPPPPPPPPPPPPP	FVGDSIC(1)DC(1)C(1)DGSDEKEGLC(1)PNVC(1)K	FVGDSIC(76.05)DC(76.05)C(76.05)DGSDEKEGLC(76.05)PNVC(76.05)K	9	3	-1.0009	By MS/MS	By matching	By MS/MS	By matching
B1N4K0	79	B1N4K0	B1N4K0	>tr|B1N4K0|B1N4K0_ENTHI Glucosidase 2 subunit beta OS=Entamoeba histolytica OX=5759 GN=EHI_135420 PE=4 SV=1	1	76.0486	3.72306e-25	143.91	139.5	76.049	1	118.366	1.9291e-14	118.37					1	143.911	3.72306e-25	143.91					1	76.0486	5.21927e-07	76.049						5	C	VEIESRFVGDSICDCCDGSDEKEGLCPNVCK	X;X;X;X;X;X;X;X;X;X;X;X;Carbamidomethyl (C);X;Carbamidomethyl (C);Carbamidomethyl (C);X;X;X;X;X;X;X;X;X;Carbamidomethyl (C);X;X;X;Carbamidomethyl (C);X	XXXXXXPPPPPPPPPPPPPPPPPPPPPPPPP	FVGDSIC(1)DC(1)C(1)DGSDEKEGLC(1)PNVC(1)K	FVGDSIC(76.05)DC(76.05)C(76.05)DGSDEKEGLC(76.05)PNVC(76.05)K	10	3	-1.0009	By MS/MS	By matching	By MS/MS	By matching
B1N4K0	89	B1N4K0	B1N4K0	>tr|B1N4K0|B1N4K0_ENTHI Glucosidase 2 subunit beta OS=Entamoeba histolytica OX=5759 GN=EHI_135420 PE=4 SV=1	1	76.0486	3.72306e-25	143.91	139.5	76.049	1	118.366	1.9291e-14	118.37					1	143.911	3.72306e-25	143.91					1	76.0486	5.21927e-07	76.049						5	C	SICDCCDGSDEKEGLCPNVCKQQTQTKIDEV	X;X;Carbamidomethyl (C);X;Carbamidomethyl (C);Carbamidomethyl (C);X;X;X;X;X;X;X;X;X;Carbamidomethyl (C);X;X;X;Carbamidomethyl (C);X;X;X;X;X;X;X;X;X;X;X	PPPPPPPPPPPPPPPPPPPPPXXXXXXXXXX	FVGDSIC(1)DC(1)C(1)DGSDEKEGLC(1)PNVC(1)K	FVGDSIC(76.05)DC(76.05)C(76.05)DGSDEKEGLC(76.05)PNVC(76.05)K	20	3	-1.0009	By MS/MS	By matching	By MS/MS	By matching
B1N4K0	93	B1N4K0	B1N4K0	>tr|B1N4K0|B1N4K0_ENTHI Glucosidase 2 subunit beta OS=Entamoeba histolytica OX=5759 GN=EHI_135420 PE=4 SV=1	1	76.0486	3.72306e-25	143.91	139.5	76.049	1	118.366	1.9291e-14	118.37					1	143.911	3.72306e-25	143.91					1	76.0486	5.21927e-07	76.049						5	C	CCDGSDEKEGLCPNVCKQQTQTKIDEVDNEI	Carbamidomethyl (C);Carbamidomethyl (C);X;X;X;X;X;X;X;X;X;Carbamidomethyl (C);X;X;X;Carbamidomethyl (C);X;X;X;X;X;X;X;X;X;X;X;X;X;X;X	PPPPPPPPPPPPPPPPPXXXXXXXXXXXXXX	FVGDSIC(1)DC(1)C(1)DGSDEKEGLC(1)PNVC(1)K	FVGDSIC(76.05)DC(76.05)C(76.05)DGSDEKEGLC(76.05)PNVC(76.05)K	24	3	-1.0009	By MS/MS	By matching	By MS/MS	By matching
B1N4K0	300	B1N4K0	B1N4K0	>tr|B1N4K0|B1N4K0_ENTHI Glucosidase 2 subunit beta OS=Entamoeba histolytica OX=5759 GN=EHI_135420 PE=4 SV=1	1	63.9787	4.63627e-06	76.049	71.743	63.979									1	76.0486	4.63627e-06	76.049					1	63.9787	5.3099e-05	63.979						1	C	ELNEKNKIDITQNNYCNDYFFLNEYSKDNFK	X;X;X;X;X;X;X;X;X;X;X;X;X;X;X;Carbamidomethyl (C);X;X;X;X;X;X;X;X;X;X;X;X;X;X;X	XXXXXPPPPPPPPPPPPPPPPPPPPPPXXXX	NKIDITQNNYC(1)NDYFFLNEYSK	NKIDITQNNYC(63.98)NDYFFLNEYSK	11	3	0.43731	By matching	By matching	By MS/MS	By matching
C4M4L8;B1N4P1	159;159	C4M4L8	C4M4L8	>tr|C4M4L8|C4M4L8_ENTHI GTP-binding protein OS=Entamoeba histolytica OX=5759 GN=EHI_031410 PE=3 SV=1;>tr|B1N4P1|B1N4P1_ENTHI GTP-binding protein OS=Entamoeba histolytica OX=5759 GN=EHI_075040 PE=3 SV=1	1	92.0105	6.75782e-16	129.85	115.57	92.01	1	129.851	6.75782e-16	129.85					1	92.0105	6.09349e-07	92.01					0	0		NaN						1	C	EAMGLTHTTGKGNVTCEGIRPIEVFMSSIVN	X;X;Oxidation (M);X;X;X;X;X;X;X;X;X;X;X;X;Carbamidomethyl (C);X;X;X;X;X;X;X;X;X;X;X;X;X;X;X	XXXXXXXXXXXPPPPPPPPPPPPPPPPPPPP	GNVTC(1)EGIRPIEVFMSSIVNR	GNVTC(92.01)EGIRPIEVFMSSIVNR	5	3	-0.63618	By MS/MS	By matching	By MS/MS	By matching
B1N4P2	141	B1N4P2	B1N4P2	>tr|B1N4P2|B1N4P2_ENTHI Uncharacterized protein OS=Entamoeba histolytica OX=5759 GN=EHI_075200 PE=4 SV=1	1	44.5108	0.00281214	48.467	34.021	44.511	1	48.4666	0.00281214	48.467					1	44.5108	0.00402863	44.511					0	0		NaN						1	C	LTFLQSKDIHSGSSACQTYKSKFQQGSCSSW	X;X;X;X;X;X;X;X;X;X;X;X;X;X;X;Carbamidomethyl (C);X;X;X;X;X;X;X;X;X;X;X;X;X;X;X	XXXXXXXPPPPPPPPPPPPPXXXXXXXXXXX	DIHSGSSAC(1)QTYK	DIHSGSSAC(44.51)QTYK	9	2	0.89448	By MS/MS	By matching	By MS/MS	By matching
B1N4P2	54	B1N4P2	B1N4P2	>tr|B1N4P2|B1N4P2_ENTHI Uncharacterized protein OS=Entamoeba histolytica OX=5759 GN=EHI_075200 PE=4 SV=1	1	73.296	7.03558e-08	112.24	98.426	73.296	1	112.235	7.03558e-08	112.24					1	97.7666	2.95069e-06	97.767					1	73.296	8.87523e-05	73.296						1	C	KATGKSILNKSEVVSCGDIEAHSIRLTVNGF	X;X;X;X;X;X;X;X;X;X;X;X;X;X;X;Carbamidomethyl (C);X;X;X;X;X;X;X;X;X;X;X;X;X;X;X	XXXXXXXXXXPPPPPPPPPPPPPPPXXXXXX	SEVVSC(1)GDIEAHSIR	SEVVSC(73.3)GDIEAHSIR	6	3	0.11478	By MS/MS	By matching	By MS/MS	By matching
B1N4Q6;C4M846	165;165	B1N4Q6;C4M846	C4M846	>tr|B1N4Q6|B1N4Q6_ENTHI 26S protease regulatory subunit 7, putative OS=Entamoeba histolytica OX=5759 GN=EHI_080890 PE=2 SV=1;>tr|C4M846|C4M846_ENTHI 26s protease regulatory subunit OS=Entamoeba histolytica OX=5759 GN=EHI_052050 PE=3 SV=1	1	80.3118	0.00461856	80.312	45.562	80.312									1	80.3118	0.00461856	80.312														1	C	QVEEKPDVTYKDIGGCKEQIERIREVVELPM	X;X;X;X;X;X;X;X;X;X;X;X;X;X;X;Carbamidomethyl (C);X;X;X;X;X;X;X;X;X;X;X;X;X;X;X	XXXXXXXXXXXPPPPPPPPPPPXXXXXXXXX	DIGGC(1)KEQIER	DIGGC(80.31)KEQIER	5	2	-0.17082	By matching	By matching	By MS/MS	By matching
B1N537;C4MB73	40;40	B1N537;C4MB73	B1N537	>tr|B1N537|B1N537_ENTHI AIG1 family protein, putative OS=Entamoeba histolytica OX=5759 GN=EHI_176700 PE=4 SV=1;>tr|C4MB73|C4MB73_ENTHI AIG1 family protein, putative OS=Entamoeba histolytica OX=5759 GN=EHI_176580 PE=4 SV=1	1	37.9681	1.72305e-10	119.62	90.658	37.968	1	39.6247	0.0001987	78.615	1	33.0574	0.0245109	33.057	1	51.531	2.58843e-05	89.624					1	37.9681	1.72305e-10	119.62	1	40.7274	0.00805538	40.727		1	C	GNFILKDNKFAVSSGCDAKTQETVGYNGEGN	X;X;X;X;X;X;X;X;X;X;X;X;X;X;X;Carbamidomethyl (C);X;X;X;X;X;X;X;X;X;X;X;X;X;X;X	XXXXXXPPPPPPPPPPPPPXXXXXXXXXXXX	FAVSSGC(1)DAK	FAVSSGC(37.97)DAK	7	2	-0.97008	By MS/MS	By MS/MS	By MS/MS	By matching
B1N537	71	B1N537	B1N537	>tr|B1N537|B1N537_ENTHI AIG1 family protein, putative OS=Entamoeba histolytica OX=5759 GN=EHI_176700 PE=4 SV=1	1	125.331	5.61713e-11	125.33	103	125.33	0	0		NaN	0	0		NaN	1	63.4622	0.000311418	63.462					1	125.331	5.61713e-11	125.33	1	95.0671	9.21102e-06	95.067		1	C	RRNVFVIDTPGLQDSCKMNERWLNAMADCIN	X;X;X;X;X;X;X;X;X;X;X;X;X;X;X;Carbamidomethyl (C);X;X;X;X;X;X;X;X;X;X;X;X;X;X;X	XXPPPPPPPPPPPPPPPXXXXXXXXXXXXXX	NVFVIDTPGLQDSC(1)K	NVFVIDTPGLQDSC(125.33)K	14	2	-0.74572	By matching	By matching	By MS/MS	By matching
B1N559;C4M8N3;P32022;B1N3C7	1001;1022;1009;1024	B1N559;C4M8N3;P32022	C4M8N3	>tr|B1N559|B1N559_ENTHI Galactose-specific adhesin 170kD subunit, putative OS=Entamoeba histolytica OX=5759 GN=EHI_042370 PE=4 SV=1;>tr|C4M8N3|C4M8N3_ENTHI Galactose-specific adhesin 170kD subunit OS=Entamoeba histolytica OX=5759 GN=EHI_077500 PE=4 SV=1;>s	1	89.6944	1.11732e-103	270.18	253.09	89.694	1	162.077	1.11732e-103	270.18					1	106.299	2.83141e-33	143.32	0	0		NaN	1	89.6944	3.01718e-36	165.96	1	22.6951	0.0146697	22.695		2;3	C	RKAFIEGKEGIEQVECASTVCQNDNSCPIIT	X;X;X;X;X;X;X;X;X;X;X;X;X;X;X;Carbamidomethyl (C);X;X;X;X;Carbamidomethyl (C);Propionamide_aa;X;X;X;X;X;Carbamidomethyl (C);Propionamide_aa;X;X;X;X	XPPPPPPPPPPPPPPPPPPPPPPPPPPPPPP	KAFIEGKEGIEQVEC(1)ASTVC(1)QNDNSC(1)PIITDVEK	KAFIEGKEGIEQVEC(89.69)ASTVC(89.69)QNDNSC(89.69)PIITDVEK	15	3	-0.18848	By MS/MS	By matching	By MS/MS	By matching
B1N559;C4M8N3;P32022;B1N3C7	1006;1027;1014;1029	B1N559;C4M8N3;P32022	C4M8N3	>tr|B1N559|B1N559_ENTHI Galactose-specific adhesin 170kD subunit, putative OS=Entamoeba histolytica OX=5759 GN=EHI_042370 PE=4 SV=1;>tr|C4M8N3|C4M8N3_ENTHI Galactose-specific adhesin 170kD subunit OS=Entamoeba histolytica OX=5759 GN=EHI_077500 PE=4 SV=1;>s	1	89.6944	1.11732e-103	270.18	253.09	89.694	1	162.077	1.11732e-103	270.18					1	106.299	2.83141e-33	143.32	0	0		NaN	1	89.6944	3.01718e-36	165.96	1	22.6951	0.0146697	22.695		2;3	C	EGKEGIEQVECASTVCQNDNSCPIITDVEKC	X;X;X;X;X;X;X;X;X;X;Carbamidomethyl (C);X;X;X;X;Carbamidomethyl (C);X;X;X;X;X;Carbamidomethyl (C);Propionamide_aa;X;X;X;X;X;X;X;X;Carbamidomethyl (C);Propionamide_aa	PPPPPPPPPPPPPPPPPPPPPPPPPPPPPPX	KAFIEGKEGIEQVEC(1)ASTVC(1)QNDNSC(1)PIITDVEK	KAFIEGKEGIEQVEC(89.69)ASTVC(89.69)QNDNSC(89.69)PIITDVEK	20	3	-0.18848	By MS/MS	By matching	By MS/MS	By matching
B1N559;C4M8N3;P32022;B1N3C7	1012;1033;1020;1035	B1N559;C4M8N3;P32022	C4M8N3	>tr|B1N559|B1N559_ENTHI Galactose-specific adhesin 170kD subunit, putative OS=Entamoeba histolytica OX=5759 GN=EHI_042370 PE=4 SV=1;>tr|C4M8N3|C4M8N3_ENTHI Galactose-specific adhesin 170kD subunit OS=Entamoeba histolytica OX=5759 GN=EHI_077500 PE=4 SV=1;>s	1	89.6944	1.11732e-103	270.18	253.09	89.694	1	162.077	1.11732e-103	270.18					1	106.299	2.83141e-33	143.32	0	0		NaN	1	89.6944	3.01718e-36	165.96	1	22.6951	0.0146697	22.695		2;3	C	EQVECASTVCQNDNSCPIITDVEKCNQNTEV	X;X;X;X;Carbamidomethyl (C);X;X;X;X;Carbamidomethyl (C);Propionamide_aa;X;X;X;X;X;Carbamidomethyl (C);X;X;X;X;X;X;X;X;Carbamidomethyl (C);Propionamide_aa;X;X;X;X;X;X	PPPPPPPPPPPPPPPPPPPPPPPPXXXXXXX	KAFIEGKEGIEQVEC(1)ASTVC(1)QNDNSC(1)PIITDVEK	KAFIEGKEGIEQVEC(89.69)ASTVC(89.69)QNDNSC(89.69)PIITDVEK	26	3	-0.18848	By MS/MS	By matching	By MS/MS	By matching
B1N559;C4M8N3	445;445	B1N559;C4M8N3	C4M8N3	>tr|B1N559|B1N559_ENTHI Galactose-specific adhesin 170kD subunit, putative OS=Entamoeba histolytica OX=5759 GN=EHI_042370 PE=4 SV=1;>tr|C4M8N3|C4M8N3_ENTHI Galactose-specific adhesin 170kD subunit OS=Entamoeba histolytica OX=5759 GN=EHI_077500 PE=4 SV=1	1	47.744	7.37307e-39	191.16	166.24	47.744	1	158.107	7.37307e-39	191.16	0	0		NaN	1	65.231	6.95569e-06	88.092	1	40.9413	0.00341776	40.941	1	47.744	3.74607e-06	94.122	1	83.8688	1.68818e-05	83.869		2;3;4	C	SCIPWPKAKPKAKKECPATCVGSYECRDLEG	X;X;X;X;X;X;X;X;X;X;X;X;X;X;X;Carbamidomethyl (C);X;X;X;Carbamidomethyl (C);Propionamide_aa;X;X;X;X;X;Carbamidomethyl (C);Propionamide_aa;X;X;X;X;X	XXXXXXXXXXXPPPPPPPPPPPPPPPPPPPP	KEC(1)PATC(1)VGSYEC(1)RDLEGC(1)VVK	KEC(47.74)PATC(47.74)VGSYEC(47.74)RDLEGC(47.74)VVK	3	4	-0.37578	By MS/MS	By matching	By MS/MS	By MS/MS
B1N559;C4M8N3	449;449	B1N559;C4M8N3	C4M8N3	>tr|B1N559|B1N559_ENTHI Galactose-specific adhesin 170kD subunit, putative OS=Entamoeba histolytica OX=5759 GN=EHI_042370 PE=4 SV=1;>tr|C4M8N3|C4M8N3_ENTHI Galactose-specific adhesin 170kD subunit OS=Entamoeba histolytica OX=5759 GN=EHI_077500 PE=4 SV=1	1	47.744	7.37307e-39	191.16	166.24	47.744	1	158.107	7.37307e-39	191.16	0	0		NaN	1	65.231	6.95569e-06	88.092	1	40.9413	0.00341776	40.941	1	47.744	3.74607e-06	94.122	1	83.8688	1.68818e-05	83.869		2;3;4	C	WPKAKPKAKKECPATCVGSYECRDLEGCVVK	X;X;X;X;X;X;X;X;X;X;X;Carbamidomethyl (C);X;X;X;Carbamidomethyl (C);X;X;X;X;X;Carbamidomethyl (C);Propionamide_aa;X;X;X;X;X;Carbamidomethyl (C);X;X;X	XXXXXXXPPPPPPPPPPPPPPPPPPPPPPPP	KEC(1)PATC(1)VGSYEC(1)RDLEGC(1)VVK	KEC(47.74)PATC(47.74)VGSYEC(47.74)RDLEGC(47.74)VVK	7	4	-0.37578	By MS/MS	By matching	By MS/MS	By MS/MS
B1N559;C4M8N3	455;455	B1N559;C4M8N3	C4M8N3	>tr|B1N559|B1N559_ENTHI Galactose-specific adhesin 170kD subunit, putative OS=Entamoeba histolytica OX=5759 GN=EHI_042370 PE=4 SV=1;>tr|C4M8N3|C4M8N3_ENTHI Galactose-specific adhesin 170kD subunit OS=Entamoeba histolytica OX=5759 GN=EHI_077500 PE=4 SV=1	1	47.744	7.37307e-39	191.16	166.24	47.744	1	158.107	7.37307e-39	191.16	0	0		NaN	1	65.231	6.95569e-06	88.092	1	40.9413	0.00341776	40.941	1	47.744	3.74607e-06	94.122	1	83.8688	1.68818e-05	83.869		2;3;4	C	KAKKECPATCVGSYECRDLEGCVVKQYNTSC	X;X;X;X;X;Carbamidomethyl (C);X;X;X;Carbamidomethyl (C);Propionamide_aa;X;X;X;X;X;Carbamidomethyl (C);X;X;X;X;X;Carbamidomethyl (C);X;X;X;X;X;X;X;X;Carbamidomethyl (C)	XPPPPPPPPPPPPPPPPPPPPPPPPXXXXXX	KEC(1)PATC(1)VGSYEC(1)RDLEGC(1)VVK	KEC(47.74)PATC(47.74)VGSYEC(47.74)RDLEGC(47.74)VVK	13	4	-0.37578	By MS/MS	By matching	By MS/MS	By MS/MS
B1N559;C4LTM0;C4M8N3;P32022;B1N3C7	1038;1054;1059;1046;1061	B1N559;C4LTM0;C4M8N3;P32022	C4M8N3	>tr|B1N559|B1N559_ENTHI Galactose-specific adhesin 170kD subunit, putative OS=Entamoeba histolytica OX=5759 GN=EHI_042370 PE=4 SV=1;>tr|C4LTM0|C4LTM0_ENTHI Gal/GalNAc lectin heavy subunit OS=Entamoeba histolytica OX=5759 GN=EHI_012270 PE=4 SV=1;>tr|C4M8N3|	1	36.1073	1.86415e-11	136.3	123.5	36.107	1	40.9413	1.86415e-11	136.3	1	68.0444	0.000156772	68.044	1	119.88	5.38584e-11	119.88	1	103.761	1.73299e-07	103.76	1	36.1073	6.26309e-11	118.24	1	103.761	1.73299e-07	103.76		1;2	C	QNTEVDYGCKAMTGECDGTTYLCKFVQLTDD	X;X;X;X;X;X;X;X;Carbamidomethyl (C);Propionamide_aa;Propionamide_aa;X;Oxidation (M);X;X;X;Carbamidomethyl (C);X;X;X;X;X;X;Carbamidomethyl (C);Propionamide_aa;X;X;X;X;X;X;X;X	XXXXXXXXXXPPPPPPPPPPPPPPXXXXXXX	AMTGEC(1)DGTTYLC(1)K	AMTGEC(36.11)DGTTYLC(36.11)K	6	3	-0.045606	By MS/MS	By MS/MS	By MS/MS	By MS/MS
B1N559;C4LTM0;C4M8N3;P32022;B1N3C7	1045;1061;1066;1053;1068	B1N559;C4LTM0;C4M8N3;P32022	C4M8N3	>tr|B1N559|B1N559_ENTHI Galactose-specific adhesin 170kD subunit, putative OS=Entamoeba histolytica OX=5759 GN=EHI_042370 PE=4 SV=1;>tr|C4LTM0|C4LTM0_ENTHI Gal/GalNAc lectin heavy subunit OS=Entamoeba histolytica OX=5759 GN=EHI_012270 PE=4 SV=1;>tr|C4M8N3|	1	36.1073	1.86415e-11	136.3	123.5	36.107	1	40.9413	1.86415e-11	136.3	1	68.0444	0.000156772	68.044	1	119.88	5.23019e-11	122.64	1	103.761	1.73299e-07	103.76	1	36.1073	6.26309e-11	118.24	1	103.761	1.73299e-07	103.76		1;2	C	GCKAMTGECDGTTYLCKFVQLTDDPSLDSEH	X;Carbamidomethyl (C);Propionamide_aa;Propionamide_aa;X;Oxidation (M);X;X;X;Carbamidomethyl (C);Propionamide_aa;X;X;X;X;X;X;Carbamidomethyl (C);X;X;X;X;X;X;X;X;X;X;X;X;X;X;X	XXXPPPPPPPPPPPPPPXXXXXXXXXXXXXX	AMTGEC(1)DGTTYLC(1)K	AMTGEC(36.11)DGTTYLC(36.11)K	13	3	-0.045606	By MS/MS	By MS/MS	By MS/MS	By MS/MS
B1N559;C4M8N3;P32022;B1N3C7	497;497;483;498	B1N559;C4M8N3;P32022	C4M8N3	>tr|B1N559|B1N559_ENTHI Galactose-specific adhesin 170kD subunit, putative OS=Entamoeba histolytica OX=5759 GN=EHI_042370 PE=4 SV=1;>tr|C4M8N3|C4M8N3_ENTHI Galactose-specific adhesin 170kD subunit OS=Entamoeba histolytica OX=5759 GN=EHI_077500 PE=4 SV=1;>s	1	61.0299	2.44255e-61	189.86	179.05	61.03	1	61.0299	2.44255e-61	189.86																						4	C	DNDKNLTEVCKQKANCEADQKPSSDGYCWSY	X;X;X;X;X;X;X;X;X;Carbamidomethyl (C);X;X;X;X;X;Carbamidomethyl (C);X;X;X;X;X;X;X;X;X;X;X;Carbamidomethyl (C);X;X;X	XXXXXXXXXXXXXPPPPPPPPPPPPPPPPPP	ANC(1)EADQKPSSDGYC(1)WSYTC(1)DQTTGFC(1)KK	ANC(61.03)EADQKPSSDGYC(61.03)WSYTC(61.03)DQTTGFC(61.03)KK	3	4	-0.49139	By MS/MS	By matching	By matching	By matching
B1N559;C4M8N3;P32022;B1N3C7	509;509;495;510	B1N559;C4M8N3;P32022	C4M8N3	>tr|B1N559|B1N559_ENTHI Galactose-specific adhesin 170kD subunit, putative OS=Entamoeba histolytica OX=5759 GN=EHI_042370 PE=4 SV=1;>tr|C4M8N3|C4M8N3_ENTHI Galactose-specific adhesin 170kD subunit OS=Entamoeba histolytica OX=5759 GN=EHI_077500 PE=4 SV=1;>s	1	61.0299	2.44255e-61	189.86	179.05	61.03	1	61.0299	2.44255e-61	189.86																						4	C	KANCEADQKPSSDGYCWSYTCDQTTGFCKKD	X;X;X;Carbamidomethyl (C);X;X;X;X;X;X;X;X;X;X;X;Carbamidomethyl (C);X;X;X;X;Carbamidomethyl (C);X;X;X;X;X;X;Carbamidomethyl (C);X;X;X	XPPPPPPPPPPPPPPPPPPPPPPPPPPPPPX	ANC(1)EADQKPSSDGYC(1)WSYTC(1)DQTTGFC(1)KK	ANC(61.03)EADQKPSSDGYC(61.03)WSYTC(61.03)DQTTGFC(61.03)KK	15	4	-0.49139	By MS/MS	By matching	By matching	By matching
B1N559;C4M8N3;P32022;B1N3C7	514;514;500;515	B1N559;C4M8N3;P32022	C4M8N3	>tr|B1N559|B1N559_ENTHI Galactose-specific adhesin 170kD subunit, putative OS=Entamoeba histolytica OX=5759 GN=EHI_042370 PE=4 SV=1;>tr|C4M8N3|C4M8N3_ENTHI Galactose-specific adhesin 170kD subunit OS=Entamoeba histolytica OX=5759 GN=EHI_077500 PE=4 SV=1;>s	1	61.0299	2.44255e-61	189.86	179.05	61.03	1	61.0299	2.44255e-61	189.86																						4	C	ADQKPSSDGYCWSYTCDQTTGFCKKDKRGEN;ADQKPSSDGYCWSYTCDQTTGFCKKDKRGKE	X;X;X;X;X;X;X;X;X;X;Carbamidomethyl (C);X;X;X;X;Carbamidomethyl (C);X;X;X;X;X;X;Carbamidomethyl (C);X;X;X;X;X;X;X;X	PPPPPPPPPPPPPPPPPPPPPPPPPXXXXXX	ANC(1)EADQKPSSDGYC(1)WSYTC(1)DQTTGFC(1)KK	ANC(61.03)EADQKPSSDGYC(61.03)WSYTC(61.03)DQTTGFC(61.03)KK	20	4	-0.49139	By MS/MS	By matching	By matching	By matching
B1N559;C4M8N3;P32022;B1N3C7	521;521;507;522	B1N559;C4M8N3;P32022	C4M8N3	>tr|B1N559|B1N559_ENTHI Galactose-specific adhesin 170kD subunit, putative OS=Entamoeba histolytica OX=5759 GN=EHI_042370 PE=4 SV=1;>tr|C4M8N3|C4M8N3_ENTHI Galactose-specific adhesin 170kD subunit OS=Entamoeba histolytica OX=5759 GN=EHI_077500 PE=4 SV=1;>s	1	61.0299	2.44255e-61	189.86	179.05	61.03	1	61.0299	2.44255e-61	189.86																						4	C	DGYCWSYTCDQTTGFCKKDKRGENMCTGKTN;DGYCWSYTCDQTTGFCKKDKRGKEMCTGKTN	X;X;X;Carbamidomethyl (C);X;X;X;X;Carbamidomethyl (C);X;X;X;X;X;X;Carbamidomethyl (C);X;X;X;X;X;X;X;X;X;Carbamidomethyl (C);Propionamide_aa;X;X;X;X;X	PPPPPPPPPPPPPPPPPPXXXXXXXXXXXXX	ANC(1)EADQKPSSDGYC(1)WSYTC(1)DQTTGFC(1)KK	ANC(61.03)EADQKPSSDGYC(61.03)WSYTC(61.03)DQTTGFC(61.03)KK	27	4	-0.49139	By MS/MS	By matching	By matching	By matching
B1N559;C4LTM0;C4M8N3;P32022;B1N3C7	394;389;394;380;395	B1N559;C4LTM0;C4M8N3;P32022	C4M8N3	>tr|B1N559|B1N559_ENTHI Galactose-specific adhesin 170kD subunit, putative OS=Entamoeba histolytica OX=5759 GN=EHI_042370 PE=4 SV=1;>tr|C4LTM0|C4LTM0_ENTHI Gal/GalNAc lectin heavy subunit OS=Entamoeba histolytica OX=5759 GN=EHI_012270 PE=4 SV=1;>tr|C4M8N3|	1	89.358	1.52961e-10	115.24	100.45	89.358	1	71.6009	6.79961e-05	74.141					1	115.237	1.52961e-10	115.24					1	89.358	1.49833e-05	89.358						1;3	C	IDELFKGIRANLTERCDRDKCSGFCDAMNRC;ITALFKGIRANLTERCDRDKCSGFCDAMNRC	X;X;X;X;X;X;X;X;X;X;X;X;X;X;X;Carbamidomethyl (C);X;X;X;X;Carbamidomethyl (C);Propionamide_aa;X;X;X;Carbamidomethyl (C);X;X;Oxidation (M);X;X;X	XXXXXXXXXPPPPPPPPPPPPPPPPPPPPPX	C(1)DRDKC(1)SGFC(1)DAMNR	C(89.36)DRDKC(89.36)SGFC(89.36)DAMNR	1	3	-0.40156	By MS/MS	By matching	By MS/MS	By matching
B1N559;C4M8N3;P32022;B1N3C7	806;806;793;808	B1N559;C4M8N3;P32022	C4M8N3	>tr|B1N559|B1N559_ENTHI Galactose-specific adhesin 170kD subunit, putative OS=Entamoeba histolytica OX=5759 GN=EHI_042370 PE=4 SV=1;>tr|C4M8N3|C4M8N3_ENTHI Galactose-specific adhesin 170kD subunit OS=Entamoeba histolytica OX=5759 GN=EHI_077500 PE=4 SV=1;>s	1	70.4489	2.7371e-30	161.02	140.07	70.449	1	25.2312	2.7371e-30	161.02	1	38.3767	0.00313674	38.377	1	77.6306	7.78861e-08	102.07	1	79.3174	5.54616e-05	79.317	1	70.4489	5.79545e-07	95.5	1	40.7788	6.47881e-05	75.911		1;2;3	C	SKTGTCKATVQPTPACSVCESGKFVEKCKDQ	X;NEM H2O;Propionamide_aa;X;X;X;Carbamidomethyl (C);NEM;NEM H2O;NEM H2O;Propionamide_aa;X;X;X;X;X;X;X;X;Carbamidomethyl (C);X;X;Carbamidomethyl (C);NEM;Propionamide_aa;X;X;X;NEM H2O;Propionamide_aa;X;X;X;X;Carbamidomethyl (C);NEM H2O;X;X	XXPPPPPPPPPPPPPPPPPPPPPPPPPXXXX	TGTC(1)KATVQPTPAC(1)SVC(1)ESGKFVEK	TGTC(70.45)KATVQPTPAC(70.45)SVC(70.45)ESGKFVEK	14	4	-0.66386	By MS/MS	By MS/MS	By MS/MS	By MS/MS
B1N559;C4M8N3;P32022;B1N3C7	809;809;796;811	B1N559;C4M8N3;P32022	C4M8N3	>tr|B1N559|B1N559_ENTHI Galactose-specific adhesin 170kD subunit, putative OS=Entamoeba histolytica OX=5759 GN=EHI_042370 PE=4 SV=1;>tr|C4M8N3|C4M8N3_ENTHI Galactose-specific adhesin 170kD subunit OS=Entamoeba histolytica OX=5759 GN=EHI_077500 PE=4 SV=1;>s	1	70.4489	2.7371e-30	161.02	140.07	70.449	1	25.2312	2.7371e-30	161.02	1	38.3767	0.00313674	38.377	1	77.6306	7.78861e-08	108.63	1	79.3174	5.54616e-05	79.317	1	70.4489	5.79545e-07	95.5	1	40.7788	6.47881e-05	75.911		1;2;3	C	GTCKATVQPTPACSVCESGKFVEKCKDQKLE	X;X;Carbamidomethyl (C);NEM;NEM H2O;NEM H2O;Propionamide_aa;X;X;X;X;X;X;X;X;Carbamidomethyl (C);Propionamide_aa;X;X;Carbamidomethyl (C);X;X;X;NEM H2O;X;X;X;X;Carbamidomethyl (C);NEM H2O;X;X;NEM H2O;X;X	PPPPPPPPPPPPPPPPPPPPPPPPXXXXXXX	TGTC(1)KATVQPTPAC(1)SVC(1)ESGKFVEK	TGTC(70.45)KATVQPTPAC(70.45)SVC(70.45)ESGKFVEK	17	4	-0.66386	By MS/MS	By MS/MS	By MS/MS	By MS/MS
B1N559;C4LTM0;C4M8N3;P32022;B1N3C7	399;394;399;385;400	B1N559;C4LTM0;C4M8N3;P32022	C4M8N3	>tr|B1N559|B1N559_ENTHI Galactose-specific adhesin 170kD subunit, putative OS=Entamoeba histolytica OX=5759 GN=EHI_042370 PE=4 SV=1;>tr|C4LTM0|C4LTM0_ENTHI Gal/GalNAc lectin heavy subunit OS=Entamoeba histolytica OX=5759 GN=EHI_012270 PE=4 SV=1;>tr|C4M8N3|	1	97.6306	1.52961e-10	145.25	123.88	97.631	1	84.3649	3.67764e-06	145.25	1	61.3438	0.000743098	61.344	1	57.4342	1.52961e-10	115.24	1	45.8289	0.00440698	45.829	1	97.6306	2.46769e-06	108.43	1	48.9809	0.00103547	55.721		2;3	C	KGIRANLTERCDRDKCSGFCDAMNRCTCPMC	X;X;X;X;X;X;X;X;X;X;Carbamidomethyl (C);X;X;X;X;Carbamidomethyl (C);X;X;X;Carbamidomethyl (C);X;X;Oxidation (M);X;X;X;X;X;X;X;X	XXXXXXXXXXPPPPPPPPPPPPPPPXXXXXX	DKC(1)SGFC(1)DAMNR	DKC(97.63)SGFC(97.63)DAMNR	3	2	-1.0485	By MS/MS	By MS/MS	By MS/MS	By MS/MS
B1N559;C4LTM0;C4M8N3;P32022;B1N3C7	403;398;403;389;404	B1N559;C4LTM0;C4M8N3;P32022	C4M8N3	>tr|B1N559|B1N559_ENTHI Galactose-specific adhesin 170kD subunit, putative OS=Entamoeba histolytica OX=5759 GN=EHI_042370 PE=4 SV=1;>tr|C4LTM0|C4LTM0_ENTHI Gal/GalNAc lectin heavy subunit OS=Entamoeba histolytica OX=5759 GN=EHI_012270 PE=4 SV=1;>tr|C4M8N3|	1	97.6306	1.52961e-10	145.25	123.88	97.631	1	84.3649	3.67764e-06	145.25	1	61.3438	0.000743098	61.344	1	57.4342	1.52961e-10	115.24	1	45.8289	0.00440698	45.829	1	97.6306	2.46769e-06	108.43	1	48.9809	0.00103547	55.721		2;3	C	ANLTERCDRDKCSGFCDAMNRCTCPMCCEND	X;X;X;X;X;X;Carbamidomethyl (C);X;X;X;X;Carbamidomethyl (C);Propionamide_aa;X;X;X;Carbamidomethyl (C);X;X;Oxidation (M);X;X;X;X;X;X;X;X;X;X;X;X	XXXXXXPPPPPPPPPPPPPPPXXXXXXXXXX	DKC(1)SGFC(1)DAMNR	DKC(97.63)SGFC(97.63)DAMNR	7	2	-1.0485	By MS/MS	By MS/MS	By MS/MS	By MS/MS
B1N559;C4LTM0;C4M8N3;P32022;B1N3C7	818;813;818;805;820	B1N559;C4LTM0;C4M8N3;P32022	C4M8N3	>tr|B1N559|B1N559_ENTHI Galactose-specific adhesin 170kD subunit, putative OS=Entamoeba histolytica OX=5759 GN=EHI_042370 PE=4 SV=1;>tr|C4LTM0|C4LTM0_ENTHI Gal/GalNAc lectin heavy subunit OS=Entamoeba histolytica OX=5759 GN=EHI_012270 PE=4 SV=1;>tr|C4M8N3|	1	47.6028	0.00811128	47.603	35.076	47.603	1	40.7277	0.0478225	46.335					1	47.6028	0.00811128	47.603					0	0		NaN						1	C	TPACSVCESGKFVEKCKDQKLERKVTLEDGK;TPACSVCESGKFVEKCKDQKLERKVTLENGK;TPSCSVCEKGKFVEKCKDQKLERKVTLEDGK	X;X;X;Carbamidomethyl (C);Propionamide_aa;X;X;Carbamidomethyl (C);NEM;Propionamide_aa;X;NEM H2O;X;NEM H2O;Propionamide_aa;X;X;X;X;Carbamidomethyl (C);NEM H2O;X;X;NEM H2O;X;X;X;NEM H2O;X;X;X;X;X;X;X	XXXXXXXXXXXXXXXPPPPPPPPXXXXXXXX	C(1)KDQKLER	C(47.6)KDQKLER	1	3	-3.7024	By MS/MS	By matching	By MS/MS	By matching
B1N559;C4LTM0;C4M8N3;P32022;B1N3C7	931;947;952;939;954	B1N559;C4LTM0;C4M8N3;P32022	C4M8N3	>tr|B1N559|B1N559_ENTHI Galactose-specific adhesin 170kD subunit, putative OS=Entamoeba histolytica OX=5759 GN=EHI_042370 PE=4 SV=1;>tr|C4LTM0|C4LTM0_ENTHI Gal/GalNAc lectin heavy subunit OS=Entamoeba histolytica OX=5759 GN=EHI_012270 PE=4 SV=1;>tr|C4M8N3|	1	50.8699	3.02613e-61	243.87	210.62	50.87	1	165.304	3.02613e-61	243.87	0	0		NaN	1	58.564	1.69716e-22	151.95	0	0		NaN	1	50.8699	6.56548e-35	181.4	1	73.6883	2.18525e-05	73.688		3;4	C	DLCAEETKNGGVPFKCKNNNCIIDPNFDCQP	X;X;Carbamidomethyl (C);Propionamide_aa;X;X;X;X;X;X;X;X;X;X;X;X;Carbamidomethyl (C);NEM H2O;Propionamide_aa;X;X;X;Carbamidomethyl (C);Propionamide_aa;X;X;X;X;X;X;X;Carbamidomethyl (C);X;X	XXXXXXXXXXXXXXXPPPPPPPPPPPPPPPP	C(1)KNNNC(1)IIDPNFDC(1)QPIEC(1)K	C(50.87)KNNNC(50.87)IIDPNFDC(50.87)QPIEC(50.87)K	1	3	-1.6284	By MS/MS	By matching	By MS/MS	By matching
B1N559;C4LTM0;C4M8N3;P32022;B1N3C7	936;952;957;944;959	B1N559;C4LTM0;C4M8N3;P32022	C4M8N3	>tr|B1N559|B1N559_ENTHI Galactose-specific adhesin 170kD subunit, putative OS=Entamoeba histolytica OX=5759 GN=EHI_042370 PE=4 SV=1;>tr|C4LTM0|C4LTM0_ENTHI Gal/GalNAc lectin heavy subunit OS=Entamoeba histolytica OX=5759 GN=EHI_012270 PE=4 SV=1;>tr|C4M8N3|	1	56.1208	3.02613e-61	243.87	210.62	56.121	1	132.644	3.02613e-61	243.87	1	65.1047	0.000113015	65.105	1	84.8945	2.381e-44	224.67	1	94.6394	2.27915e-15	134.93	1	56.1208	6.56548e-35	181.4	1	59.5022	2.18525e-05	79.393		3;4	C	ETKNGGVPFKCKNNNCIIDPNFDCQPIECKI	X;X;X;X;X;X;X;X;X;X;Carbamidomethyl (C);NEM H2O;X;X;X;Carbamidomethyl (C);X;X;X;X;X;X;X;Carbamidomethyl (C);X;X;X;X;Carbamidomethyl (C);X;X	XXXXXXXXXXPPPPPPPPPPPPPPPPPPPPX	NNNC(1)IIDPNFDC(1)QPIEC(1)K	NNNC(56.12)IIDPNFDC(56.12)QPIEC(56.12)K	4	3	-0.82564	By MS/MS	By MS/MS	By MS/MS	By MS/MS
B1N559;C4LTM0;C4M8N3;P32022;B1N3C7	944;960;965;952;967	B1N559;C4LTM0;C4M8N3;P32022	C4M8N3	>tr|B1N559|B1N559_ENTHI Galactose-specific adhesin 170kD subunit, putative OS=Entamoeba histolytica OX=5759 GN=EHI_042370 PE=4 SV=1;>tr|C4LTM0|C4LTM0_ENTHI Gal/GalNAc lectin heavy subunit OS=Entamoeba histolytica OX=5759 GN=EHI_012270 PE=4 SV=1;>tr|C4M8N3|	1	123.562	3.02613e-61	243.87	210.62	162.26	1	123.562	3.02613e-61	243.87	1	65.1047	0.000113015	65.105	1	84.8945	2.381e-44	224.67	1	94.6394	2.27915e-15	134.93	1	56.1208	6.56548e-35	181.4	1	59.5022	2.18525e-05	79.393		2;3;4	C	FKCKNNNCIIDPNFDCQPIECKIQEIVITEK	X;X;Carbamidomethyl (C);NEM H2O;Propionamide_aa;X;X;X;Carbamidomethyl (C);Propionamide_aa;X;X;X;X;X;X;X;Carbamidomethyl (C);X;X;X;X;Carbamidomethyl (C);X;X;X;X;X;X;X;X;X;NEM H2O	XXPPPPPPPPPPPPPPPPPPPPXXXXXXXXX	NNNCIIDPNFDC(1)QPIEC(1)K	NNNC(-123.56)IIDPNFDC(123.56)QPIEC(140.58)K	12	2	-1.7836	By MS/MS	By MS/MS	By MS/MS	By MS/MS
B1N559;C4LTM0;C4M8N3;P32022;B1N3C7	949;965;970;957;972	B1N559;C4LTM0;C4M8N3;P32022	C4M8N3	>tr|B1N559|B1N559_ENTHI Galactose-specific adhesin 170kD subunit, putative OS=Entamoeba histolytica OX=5759 GN=EHI_042370 PE=4 SV=1;>tr|C4LTM0|C4LTM0_ENTHI Gal/GalNAc lectin heavy subunit OS=Entamoeba histolytica OX=5759 GN=EHI_012270 PE=4 SV=1;>tr|C4M8N3|	1	140.582	3.02613e-61	243.87	210.62	162.26	1	140.582	3.02613e-61	243.87	1	65.1047	0.000113015	65.105	1	84.8945	2.381e-44	224.67	1	94.6394	2.27915e-15	134.93	1	56.1208	6.56548e-35	181.4	1	59.5022	2.18525e-05	79.393		1;2;3;4	C	NNCIIDPNFDCQPIECKIQEIVITEKDGIKT	X;X;Carbamidomethyl (C);Propionamide_aa;X;X;X;X;X;X;X;Carbamidomethyl (C);X;X;X;X;Carbamidomethyl (C);X;X;X;X;X;X;X;X;X;NEM H2O;X;X;X;NEM H2O;X	PPPPPPPPPPPPPPPPPXXXXXXXXXXXXXX	NNNCIIDPNFDC(1)QPIEC(1)K	NNNC(-123.56)IIDPNFDC(123.56)QPIEC(140.58)K	17	2	-1.7836	By MS/MS	By MS/MS	By MS/MS	By MS/MS
B1N559;C4M8N3	638;638	B1N559;C4M8N3	C4M8N3	>tr|B1N559|B1N559_ENTHI Galactose-specific adhesin 170kD subunit, putative OS=Entamoeba histolytica OX=5759 GN=EHI_042370 PE=4 SV=1;>tr|C4M8N3|C4M8N3_ENTHI Galactose-specific adhesin 170kD subunit OS=Entamoeba histolytica OX=5759 GN=EHI_077500 PE=4 SV=1	1	31.0425	4.4793e-05	86.288	67.757	31.043	1	31.0425	4.4793e-05	86.288					1	72.2905	0.000131214	73.082					1	74.7805	0.000189164	74.78						2	C	SNKHQICDYTGTTPKCKVSNCTEDLVRDGCL	X;X;X;X;X;X;Carbamidomethyl (C);X;X;X;X;X;X;X;NEM H2O;Carbamidomethyl (C);NEM H2O;X;X;X;Carbamidomethyl (C);Propionamide_aa;X;X;X;X;X;X;X;X;Carbamidomethyl (C);Propionamide_aa;X	XXXPPPPPPPPPPPPPPPPPPPPPPPPXXXX	HQIC(1)DYTGTTPKC(1)K	HQIC(31.04)DYTGTTPKC(31.04)K	13	3	-0.54461	By MS/MS	By matching	By MS/MS	By matching
B1N559;C4M8N3	643;643	B1N559;C4M8N3	C4M8N3	>tr|B1N559|B1N559_ENTHI Galactose-specific adhesin 170kD subunit, putative OS=Entamoeba histolytica OX=5759 GN=EHI_042370 PE=4 SV=1;>tr|C4M8N3|C4M8N3_ENTHI Galactose-specific adhesin 170kD subunit OS=Entamoeba histolytica OX=5759 GN=EHI_077500 PE=4 SV=1	1	50.8308	3.85885e-06	104.82	81.47	50.831	1	104.824	3.85885e-06	104.82	1	60.2551	0.0010131	60.255	1	61.1268	4.66021e-06	100.88	1	104.221	3.9812e-06	104.22	1	50.8308	0.000189164	74.78	1	82.4167	0.000155051	82.417		1;2	C	ICDYTGTTPKCKVSNCTEDLVRDGCLIKRCN	X;Carbamidomethyl (C);X;X;X;X;X;X;X;NEM H2O;Carbamidomethyl (C);NEM H2O;X;X;X;Carbamidomethyl (C);X;X;X;X;X;X;X;X;Carbamidomethyl (C);Propionamide_aa;X;X;NEM H2O;X;X;X	XXXXXXXXXXPPPPPPPPPPPPPPPPPPPXX	VSNC(1)TEDLVRDGC(1)LIKR	VSNC(50.83)TEDLVRDGC(50.83)LIKR	4	4	-1.1976	By MS/MS	By MS/MS	By MS/MS	By MS/MS
B1N559;C4M8N3;P32022;B1N3C7	476;476;462;477	B1N559;C4M8N3;P32022	C4M8N3	>tr|B1N559|B1N559_ENTHI Galactose-specific adhesin 170kD subunit, putative OS=Entamoeba histolytica OX=5759 GN=EHI_042370 PE=4 SV=1;>tr|C4M8N3|C4M8N3_ENTHI Galactose-specific adhesin 170kD subunit OS=Entamoeba histolytica OX=5759 GN=EHI_077500 PE=4 SV=1;>s	1	58.1235	8.4753e-07	104.2	97.593	58.123	1	58.0243	1.81749e-05	93.495					1	104.195	8.4753e-07	104.2					1	58.1235	0.000244128	58.123						3	C	CVVKQYNTSCEPKVKCMVPYCDNDKNLTEVC;CVVTKYNDTCQPKVKCMVPYCDNDKNLTEVC	Carbamidomethyl (C);Propionamide_aa;X;X;X;X;X;X;X;X;Carbamidomethyl (C);X;X;X;X;NEM H2O;Carbamidomethyl (C);Oxidation (M);X;X;X;Carbamidomethyl (C);X;X;X;X;X;X;X;X;X;Carbamidomethyl (C)	XXXXXXXXXXXXXPPPPPPPPPPPPPPPPPP	VKC(1)MVPYC(1)DNDKNLTEVC(1)K	VKC(58.12)MVPYC(58.12)DNDKNLTEVC(58.12)K	3	4	-2.3364	By MS/MS	By matching	By MS/MS	By matching
B1N559;C4M8N3;P32022;B1N3C7	481;481;467;482	B1N559;C4M8N3;P32022	C4M8N3	>tr|B1N559|B1N559_ENTHI Galactose-specific adhesin 170kD subunit, putative OS=Entamoeba histolytica OX=5759 GN=EHI_042370 PE=4 SV=1;>tr|C4M8N3|C4M8N3_ENTHI Galactose-specific adhesin 170kD subunit OS=Entamoeba histolytica OX=5759 GN=EHI_077500 PE=4 SV=1;>s	1	58.1235	8.4753e-07	104.2	97.593	58.123	1	58.0243	1.81749e-05	93.495					1	104.195	8.4753e-07	104.2					1	58.1235	0.000244128	58.123						3	C	YNDTCQPKVKCMVPYCDNDKNLTEVCKQKAN;YNTSCEPKVKCMVPYCDNDKNLTEVCKQKAN	X;X;X;X;Carbamidomethyl (C);X;X;X;X;NEM H2O;Carbamidomethyl (C);Oxidation (M);X;X;X;Carbamidomethyl (C);X;X;X;X;X;X;X;X;X;Carbamidomethyl (C);X;X;X;X;X	XXXXXXXXPPPPPPPPPPPPPPPPPPPXXXX	VKC(1)MVPYC(1)DNDKNLTEVC(1)K	VKC(58.12)MVPYC(58.12)DNDKNLTEVC(58.12)K	8	4	-2.3364	By MS/MS	By matching	By MS/MS	By matching
B1N559;C4M8N3;P32022;B1N3C7	491;491;477;492	B1N559;C4M8N3;P32022	C4M8N3	>tr|B1N559|B1N559_ENTHI Galactose-specific adhesin 170kD subunit, putative OS=Entamoeba histolytica OX=5759 GN=EHI_042370 PE=4 SV=1;>tr|C4M8N3|C4M8N3_ENTHI Galactose-specific adhesin 170kD subunit OS=Entamoeba histolytica OX=5759 GN=EHI_077500 PE=4 SV=1;>s	1	58.1235	8.4753e-07	104.2	97.593	58.123	1	58.0243	1.81749e-05	93.495	0	0		NaN	1	41.6523	8.4753e-07	104.2	0	0		NaN	1	58.1235	0.000244128	58.123	0	0		NaN		1;3	C	CMVPYCDNDKNLTEVCKQKANCEADQKPSSD	Carbamidomethyl (C);Oxidation (M);X;X;X;Carbamidomethyl (C);X;X;X;X;X;X;X;X;X;Carbamidomethyl (C);X;X;X;X;X;Carbamidomethyl (C);X;X;X;X;X;X;X;X;X	PPPPPPPPPPPPPPPPPXXXXXXXXXXXXXX	VKC(1)MVPYC(1)DNDKNLTEVC(1)K	VKC(58.12)MVPYC(58.12)DNDKNLTEVC(58.12)K	18	4	-2.3364	By MS/MS	By matching	By MS/MS	By matching
B1N559;C4LTM0;C4M8N3;P32022;B1N3C7	572;566;572;558;573	B1N559;C4LTM0;C4M8N3;P32022	C4M8N3	>tr|B1N559|B1N559_ENTHI Galactose-specific adhesin 170kD subunit, putative OS=Entamoeba histolytica OX=5759 GN=EHI_042370 PE=4 SV=1;>tr|C4LTM0|C4LTM0_ENTHI Gal/GalNAc lectin heavy subunit OS=Entamoeba histolytica OX=5759 GN=EHI_012270 PE=4 SV=1;>tr|C4M8N3|	1	22.3203	1.62765e-08	128.01	102	22.32	1	90.0996	1.62765e-08	116.55					1	126.194	8.44161e-07	126.19	1	74.6109	0.000170284	74.611	1	22.3203	8.44161e-07	128.01	1	80.0144	0.000108667	80.014		1;2;3	C	VKTSPYIEMSCYVAKCNLNTGMCENRLSCDT	X;NEM H2O;X;X;X;X;X;X;Oxidation (M);X;Carbamidomethyl (C);Propionamide_aa;X;X;X;NEM H2O;Carbamidomethyl (C);X;X;X;X;X;Oxidation (M);Carbamidomethyl (C);Propionamide_aa;X;X;X;X;X;Carbamidomethyl (C);Propionamide_aa;X;X	XXPPPPPPPPPPPPPPPPPPPPPPPPXXXXX	TSPYIEMSC(1)YVAKC(1)NLNTGMC(1)ENR	TSPYIEMSC(22.32)YVAKC(22.32)NLNTGMC(22.32)ENR	14	3	-0.83063	By MS/MS	By matching	By MS/MS	By MS/MS
B1N559;C4LTM0;C4M8N3;P32022;B1N3C7	579;573;579;565;580	B1N559;C4LTM0;C4M8N3;P32022	C4M8N3	>tr|B1N559|B1N559_ENTHI Galactose-specific adhesin 170kD subunit, putative OS=Entamoeba histolytica OX=5759 GN=EHI_042370 PE=4 SV=1;>tr|C4LTM0|C4LTM0_ENTHI Gal/GalNAc lectin heavy subunit OS=Entamoeba histolytica OX=5759 GN=EHI_012270 PE=4 SV=1;>tr|C4M8N3|	1	22.3203	1.62765e-08	128.01	102	22.32	1	90.0996	1.62765e-08	116.55					1	126.194	8.44161e-07	126.19	1	74.6109	0.000170284	74.611	1	22.3203	8.44161e-07	128.01	1	80.0144	0.000108667	80.014		1;2;3	C	EMSCYVAKCNLNTGMCENRLSCDTYSSCGGD	X;Oxidation (M);X;Carbamidomethyl (C);Propionamide_aa;X;X;X;NEM H2O;Carbamidomethyl (C);Propionamide_aa;X;X;X;X;X;Oxidation (M);Carbamidomethyl (C);X;X;X;X;X;Carbamidomethyl (C);Propionamide_aa;X;X;X;X;X;Carbamidomethyl (C);Propionamide_aa;X;X;X	PPPPPPPPPPPPPPPPPPPXXXXXXXXXXXX	TSPYIEMSC(1)YVAKC(1)NLNTGMC(1)ENR	TSPYIEMSC(22.32)YVAKC(22.32)NLNTGMC(22.32)ENR	21	3	-0.83063	By MS/MS	By matching	By MS/MS	By MS/MS
B1N559;C4LTM0;C4M8N3;P32022;B1N3C7	1021;1037;1042;1029;1044	B1N559;C4LTM0;C4M8N3;P32022	C4M8N3	>tr|B1N559|B1N559_ENTHI Galactose-specific adhesin 170kD subunit, putative OS=Entamoeba histolytica OX=5759 GN=EHI_042370 PE=4 SV=1;>tr|C4LTM0|C4LTM0_ENTHI Gal/GalNAc lectin heavy subunit OS=Entamoeba histolytica OX=5759 GN=EHI_012270 PE=4 SV=1;>tr|C4M8N3|	1	196.56	3.02279e-16	198.57	176.52	198.57	1	101.745	1.51507e-08	164.9	1	79.5005	0.00023851	80.69	1	140.63	1.35746e-07	153.95	1	89.3005	2.1757e-05	89.301	1	196.56	3.02279e-16	198.57	1	99.4999	6.43262e-07	99.5		1;2	C	CQNDNSCPIIADVEKCNQNTEVDYGCKAMTG;CQNDNSCPIITDVEKCNQNTEVDYGCKAMTG	Carbamidomethyl (C);Propionamide_aa;X;X;X;X;X;Carbamidomethyl (C);NEM H2O;Propionamide_aa;X;X;X;X;X;X;X;X;Carbamidomethyl (C);X;X;X;X;X;X;X;X;X;Carbamidomethyl (C);Propionamide_aa;Propionamide_aa;X;Oxidation (M);X;X	XXXXXXXXXXXXXXXPPPPPPPPPPPPXXXX	C(1)NQNTEVDYGCK	C(196.56)NQNTEVDYGC(-196.56)K	1	2	-1.2368	By MS/MS	By MS/MS	By MS/MS	By MS/MS
B1N559;C4LTM0;C4M8N3;P32022;B1N3C7	1031;1047;1052;1039;1054	B1N559;C4LTM0;C4M8N3;P32022	C4M8N3	>tr|B1N559|B1N559_ENTHI Galactose-specific adhesin 170kD subunit, putative OS=Entamoeba histolytica OX=5759 GN=EHI_042370 PE=4 SV=1;>tr|C4LTM0|C4LTM0_ENTHI Gal/GalNAc lectin heavy subunit OS=Entamoeba histolytica OX=5759 GN=EHI_012270 PE=4 SV=1;>tr|C4M8N3|	1	137.165	1.51507e-08	164.9	150.89	138.24	1	108.37	1.51507e-08	164.9	1	54.3425	0.000805131	61.11	1	118.597	4.54561e-08	153.95	1	98.7111	8.60201e-07	99.5	1	137.165	1.25283e-07	138.24	1	99.4999	6.43262e-07	99.5		1;2	C	ADVEKCNQNTEVDYGCKAMTGECDGTTYLCK;TDVEKCNQNTEVDYGCKAMTGECDGTTYLCK	X;X;X;X;X;Carbamidomethyl (C);Propionamide_aa;X;X;X;X;X;X;X;X;X;Carbamidomethyl (C);X;X;Oxidation (M);X;X;X;Carbamidomethyl (C);Propionamide_aa;X;X;X;X;X;X;Carbamidomethyl (C);Propionamide_aa;X	XXXXXPPPPPPPPPPPPXXXXXXXXXXXXXX	CNQNTEVDYGC(1)K	C(-137.17)NQNTEVDYGC(137.17)K	11	2	-0.25796	By MS/MS	By MS/MS	By MS/MS	By MS/MS
B1N559	773	B1N559	B1N559	>tr|B1N559|B1N559_ENTHI Galactose-specific adhesin 170kD subunit, putative OS=Entamoeba histolytica OX=5759 GN=EHI_042370 PE=4 SV=1	1	84.4752	4.38464e-20	202.29	182.51	103.76	1	192.147	5.63645e-19	192.15	1	36.2925	0.0103124	36.292	1	147.262	7.86213e-11	147.26	1	83.2433	1.85889e-05	83.243	1	84.4752	4.38464e-20	202.29	1	58.32	0.000597596	58.32		1;2	C	EKDVSSTSDNDICAKCSSLTCPADTTYRTYT	X;X;X;X;X;X;X;X;X;X;X;X;Carbamidomethyl (C);X;Propionamide_aa;Carbamidomethyl (C);X;X;X;X;Carbamidomethyl (C);Propionamide_aa;X;X;X;X;X;X;X;X;X;X	XXXXXXXXXXXXXXXPPPPPPPPPPPPPXXX	C(1)SSLTCPADTTYR	C(84.48)SSLTC(-84.48)PADTTYR	1	2	0.40359	By MS/MS	By MS/MS	By MS/MS	By MS/MS
B1N559	778	B1N559	B1N559	>tr|B1N559|B1N559_ENTHI Galactose-specific adhesin 170kD subunit, putative OS=Entamoeba histolytica OX=5759 GN=EHI_042370 PE=4 SV=1	1	109.259	4.38464e-20	202.29	182.51	129.54	1	192.147	5.63645e-19	192.15	1	36.2925	0.0103124	36.292	1	115.399	6.49489e-11	147.26	1	83.2433	1.85889e-05	83.243	1	109.259	4.38464e-20	202.29	1	58.32	0.000597596	58.32		1;2	C	STSDNDICAKCSSLTCPADTTYRTYTYDSKT	X;X;X;X;X;X;X;Carbamidomethyl (C);X;Propionamide_aa;Carbamidomethyl (C);Propionamide_aa;X;X;X;X;Carbamidomethyl (C);X;X;X;X;X;X;X;X;X;X;X;X;X;NEM H2O;Propionamide_aa;X	XXXXXXXXXXPPPPPPPPPPPPPXXXXXXXX	CSSLTC(1)PADTTYR	C(-109.26)SSLTC(109.26)PADTTYR	6	2	-0.47349	By MS/MS	By MS/MS	By MS/MS	By MS/MS
B1N559;C4LTM0;C4M8N3;P32022;B1N3C7	1078;1094;1099;1086;1101	B1N559;C4LTM0;C4M8N3;P32022	C4M8N3	>tr|B1N559|B1N559_ENTHI Galactose-specific adhesin 170kD subunit, putative OS=Entamoeba histolytica OX=5759 GN=EHI_042370 PE=4 SV=1;>tr|C4LTM0|C4LTM0_ENTHI Gal/GalNAc lectin heavy subunit OS=Entamoeba histolytica OX=5759 GN=EHI_012270 PE=4 SV=1;>tr|C4M8N3|	1	70.5248	0.000391298	123.01	82.656	70.525	1	50.8046	0.000499641	123.01					1	64.5671	0.00222606	104.37	0	0		NaN	1	70.5248	0.000391298	119.41	0	0		NaN		1	C	TKSGVELNNACLKYKCVESKGSDGKITHKWE	X;NEM H2O;X;X;X;X;X;X;X;X;Carbamidomethyl (C);Propionamide_aa;X;NEM H2O;X;NEM H2O;Carbamidomethyl (C);X;X;X;NEM H2O;X;X;X;X;NEM H2O;X;X;X;NEM H2O;X;X	XXXXXXXXXXXXXPPPPPPPPPPPPXXXXXX	YKC(1)VESK	YKC(70.52)VESK	3	2	0.54165	By MS/MS	By matching	By MS/MS	By matching
B1N559;C4M8N3	843;843	B1N559;C4M8N3	C4M8N3	>tr|B1N559|B1N559_ENTHI Galactose-specific adhesin 170kD subunit, putative OS=Entamoeba histolytica OX=5759 GN=EHI_042370 PE=4 SV=1;>tr|C4M8N3|C4M8N3_ENTHI Galactose-specific adhesin 170kD subunit OS=Entamoeba histolytica OX=5759 GN=EHI_077500 PE=4 SV=1	1	67.136	5.07745e-16	141.34	128.55	67.136	1	78.6898	4.28082e-11	125.36	1	92.2652	2.86151e-06	105.98	1	67.136	2.14474e-10	118.19	1	141.341	5.07745e-16	141.34	1	123.291	1.11482e-10	129.85	1	81.703	3.41485e-06	102.52		1;2	C	TLENGKEYKYTIPKDCVNEQCIPRTYVDCLG	X;X;X;X;X;X;X;X;X;X;X;X;X;NEM H2O;X;Carbamidomethyl (C);X;X;X;X;Carbamidomethyl (C);Propionamide_aa;X;X;X;X;X;X;X;Carbamidomethyl (C);Propionamide_aa;X;X	XXXXXXXXXPPPPPPPPPPPPPPPXXXXXXX	YTIPKDC(1)VNEQC(1)IPR	YTIPKDC(67.14)VNEQC(67.14)IPR	7	3	-0.51542	By MS/MS	By MS/MS	By MS/MS	By MS/MS
B1N559;C4M8N3	848;848	B1N559;C4M8N3	C4M8N3	>tr|B1N559|B1N559_ENTHI Galactose-specific adhesin 170kD subunit, putative OS=Entamoeba histolytica OX=5759 GN=EHI_042370 PE=4 SV=1;>tr|C4M8N3|C4M8N3_ENTHI Galactose-specific adhesin 170kD subunit OS=Entamoeba histolytica OX=5759 GN=EHI_077500 PE=4 SV=1	1	67.136	5.07745e-16	141.34	128.55	67.136	1	78.6898	4.28082e-11	125.36	1	92.2652	2.86151e-06	105.98	1	67.136	2.14474e-10	118.19	1	141.341	5.07745e-16	141.34	1	123.291	1.11482e-10	129.85	1	81.703	3.41485e-06	102.52		1;2	C	KEYKYTIPKDCVNEQCIPRTYVDCLGNDDNF	X;X;X;X;X;X;X;X;NEM H2O;X;Carbamidomethyl (C);Propionamide_aa;X;X;X;X;Carbamidomethyl (C);X;X;X;X;X;X;X;Carbamidomethyl (C);Propionamide_aa;X;X;X;X;X;X;X	XXXXPPPPPPPPPPPPPPPXXXXXXXXXXXX	YTIPKDC(1)VNEQC(1)IPR	YTIPKDC(67.14)VNEQC(67.14)IPR	12	3	-0.51542	By MS/MS	By MS/MS	By MS/MS	By MS/MS
B1N559;C4M8N3;P32022;B1N3C7	652;652;638;653	B1N559;C4M8N3;P32022	C4M8N3	>tr|B1N559|B1N559_ENTHI Galactose-specific adhesin 170kD subunit, putative OS=Entamoeba histolytica OX=5759 GN=EHI_042370 PE=4 SV=1;>tr|C4M8N3|C4M8N3_ENTHI Galactose-specific adhesin 170kD subunit OS=Entamoeba histolytica OX=5759 GN=EHI_077500 PE=4 SV=1;>s	1	50.8308	0.000236183	88.643	64.671	50.831	1	42.0946	0.00458726	88.643	0	0		NaN	1	61.1268	0.000236183	81.297	1	84.2437	0.00551102	84.244	1	50.8308	0.00110078	81.297	1	86.8662	0.00496034	86.866		1;2	C	KCKVSNCTEDLVRDGCLIKRCNETSKTTYWE;QCKVSNCTEDLVRDGCLIKRCNETSKTTYWE	NEM H2O;Carbamidomethyl (C);NEM H2O;X;X;X;Carbamidomethyl (C);Propionamide_aa;X;X;X;X;X;X;X;X;Carbamidomethyl (C);X;X;NEM H2O;X;X;X;X;X;X;X;X;X;X;X;X	XXXPPPPPPPPPPPPPPPPPXXXXXXXXXXX	VSNC(1)TEDLVRDGC(1)LIKR	VSNC(50.83)TEDLVRDGC(50.83)LIKR	13	4	-1.1976	By MS/MS	By matching	By MS/MS	By MS/MS
B1N559;C4M8N3	531;531	B1N559;C4M8N3	C4M8N3	>tr|B1N559|B1N559_ENTHI Galactose-specific adhesin 170kD subunit, putative OS=Entamoeba histolytica OX=5759 GN=EHI_042370 PE=4 SV=1;>tr|C4M8N3|C4M8N3_ENTHI Galactose-specific adhesin 170kD subunit OS=Entamoeba histolytica OX=5759 GN=EHI_077500 PE=4 SV=1	1	80.706	0.000717196	80.706	53.452	80.706	1	62.6328	0.00159433	62.633					1	56.043	0.00197267	57.164					1	80.706	0.000717196	80.706						1	C	QTTGFCKKDKRGENMCTGKTNNCQEYVCDAE;QTTGFCKKDKRGENMCTGKTNNCQEYVCDEK	X;X;X;X;X;Carbamidomethyl (C);X;X;X;X;X;X;X;X;X;Carbamidomethyl (C);X;X;X;X;X;X;Carbamidomethyl (C);Propionamide_aa;X;X;X;X;Carbamidomethyl (C);Propionamide_aa;X;X;NEM H2O	XXXXXXXXPPPPPPPPPPPXXXXXXXXXXXX	RGENMC(1)TGK	RGENMC(80.71)TGK	6	2	-1.2766	By MS/MS	By matching	By MS/MS	By matching
B1N559;C4M8N3;P32022;B1N3C7	556;556;542;557	B1N559;C4M8N3;P32022	C4M8N3	>tr|B1N559|B1N559_ENTHI Galactose-specific adhesin 170kD subunit, putative OS=Entamoeba histolytica OX=5759 GN=EHI_042370 PE=4 SV=1;>tr|C4M8N3|C4M8N3_ENTHI Galactose-specific adhesin 170kD subunit OS=Entamoeba histolytica OX=5759 GN=EHI_077500 PE=4 SV=1;>s	1	69.1111	8.71089e-05	69.111	57.852	69.111	1	69.1111	8.71089e-05	69.111					0	0		NaN														2	C	YVCDAEQRCSVRDKVCVKTSPYIEMSCYVAK;YVCDEKQRCSVRDKVCVKTSPYIEMSCYVAK;YVCDSEQRCSVRDKVCVKTSPYIEMSCYVAK	X;X;Carbamidomethyl (C);Propionamide_aa;X;X;NEM H2O;X;X;X;X;X;X;X;X;X;Carbamidomethyl (C);X;NEM H2O;X;X;X;X;X;X;Oxidation (M);X;Carbamidomethyl (C);Propionamide_aa;X;X;X;NEM H2O	XXXXXXXXXXXXPPPPPPPPPPPPPPPPPPP	VC(1)VKTSPYIEMSC(1)YVAK	VC(69.11)VKTSPYIEMSC(69.11)YVAK	2	2	2.6183	By MS/MS	By matching	By matching	By matching
B1N559;C4M8N3;P32022;B1N3C7	567;567;553;568	B1N559;C4M8N3;P32022	C4M8N3	>tr|B1N559|B1N559_ENTHI Galactose-specific adhesin 170kD subunit, putative OS=Entamoeba histolytica OX=5759 GN=EHI_042370 PE=4 SV=1;>tr|C4M8N3|C4M8N3_ENTHI Galactose-specific adhesin 170kD subunit OS=Entamoeba histolytica OX=5759 GN=EHI_077500 PE=4 SV=1;>s	1	69.1111	1.62765e-08	100.22	43.048	69.111	1	69.1111	1.62765e-08	99.844	1	70.4379	0.000149648	70.438	1	41.2269	1.80161e-07	100.22	1	73.9271	0.000115288	73.927	1	22.3203	0.00010372	75.102	1	65.0429	0.000393083	65.043		1;2;3	C	RDKVCVKTSPYIEMSCYVAKCNLNTGMCENR	X;X;X;X;Carbamidomethyl (C);X;NEM H2O;X;X;X;X;X;X;Oxidation (M);X;Carbamidomethyl (C);X;X;X;NEM H2O;Carbamidomethyl (C);Propionamide_aa;X;X;X;X;X;Oxidation (M);Carbamidomethyl (C);Propionamide_aa;X;X;X	XPPPPPPPPPPPPPPPPPPPPPPPPPPPPPP	VC(1)VKTSPYIEMSC(1)YVAK	VC(69.11)VKTSPYIEMSC(69.11)YVAK	13	2	2.6183	By MS/MS	By MS/MS	By MS/MS	By MS/MS
B1N559;C4M8N3	461;461	B1N559;C4M8N3	C4M8N3	>tr|B1N559|B1N559_ENTHI Galactose-specific adhesin 170kD subunit, putative OS=Entamoeba histolytica OX=5759 GN=EHI_042370 PE=4 SV=1;>tr|C4M8N3|C4M8N3_ENTHI Galactose-specific adhesin 170kD subunit OS=Entamoeba histolytica OX=5759 GN=EHI_077500 PE=4 SV=1	1	47.744	7.37307e-39	191.16	166.24	47.744	1	158.107	7.37307e-39	191.16					1	26.462	0.00269665	65.252	0	0		NaN	1	47.744	8.69425e-05	63.869	1	27.5231	0.0131933	43.808		1;4	C	PATCVGSYECRDLEGCVVKQYNTSCEPKVKC	X;X;X;Carbamidomethyl (C);Propionamide_aa;X;X;X;X;X;Carbamidomethyl (C);Propionamide_aa;X;X;X;X;X;Carbamidomethyl (C);X;X;X;X;X;X;X;X;Carbamidomethyl (C);X;X;X;X;NEM H2O;Carbamidomethyl (C)	PPPPPPPPPPPPPPPPPPPXXXXXXXXXXXX	KEC(1)PATC(1)VGSYEC(1)RDLEGC(1)VVK	KEC(47.74)PATC(47.74)VGSYEC(47.74)RDLEGC(47.74)VVK	19	4	-0.37578	By MS/MS	By matching	By MS/MS	By matching
B1N559	770	B1N559	B1N559	>tr|B1N559|B1N559_ENTHI Galactose-specific adhesin 170kD subunit, putative OS=Entamoeba histolytica OX=5759 GN=EHI_042370 PE=4 SV=1	1	125.79	3.76116e-15	125.79	117.32	125.79	1	97.9405	3.77368e-10	97.94	0	0		NaN	1	69.845	1.98488e-08	112.44	1	64.1035	0.000443939	64.104	1	125.79	3.76116e-15	125.79	0	0		NaN		1;2	C	CVFEKDVSSTSDNDICAKCSSLTCPADTTYR	Carbamidomethyl (C);X;X;X;X;X;X;X;X;X;X;X;X;X;X;Carbamidomethyl (C);X;X;Carbamidomethyl (C);Propionamide_aa;X;X;X;X;Carbamidomethyl (C);Propionamide_aa;X;X;X;X;X;X;X	PPPPPPPPPPPPPPPPPPXXXXXXXXXXXXX	GNDNSYSC(1)VFEKDVSSTSDNDIC(1)AK	GNDNSYSC(125.79)VFEKDVSSTSDNDIC(125.79)AK	23	3	-1.1529	By MS/MS	By matching	By MS/MS	By MS/MS
B1N559;C4M8N3;P32022;B1N3C7	900;921;908;923	B1N559;C4M8N3;P32022	C4M8N3	>tr|B1N559|B1N559_ENTHI Galactose-specific adhesin 170kD subunit, putative OS=Entamoeba histolytica OX=5759 GN=EHI_042370 PE=4 SV=1;>tr|C4M8N3|C4M8N3_ENTHI Galactose-specific adhesin 170kD subunit OS=Entamoeba histolytica OX=5759 GN=EHI_077500 PE=4 SV=1;>s	1	65.1792	0.000750706	65.179	53.016	65.179	1	46.6431	0.00421006	46.643					1	50.3537	0.002461	50.354					1	65.1792	0.000750706	65.179						2	C	ADKEAYCTYEITTRECKTCSLIETREKVQEV;GRQRSIFTYEITTRECKTCSLIETREKVQEV	X;X;NEM H2O;X;X;X;Carbamidomethyl (C);Propionamide_aa;X;X;X;X;X;X;X;X;Carbamidomethyl (C);NEM H2O;X;Carbamidomethyl (C);Propionamide_aa;X;X;X;X;X;X;X;NEM H2O;X;X;X;X	XXXXXXXXXXXXXXPPPPPPPPPPPXXXXXX	EC(1)KTC(1)SLIETR	EC(65.18)KTC(65.18)SLIETR	2	2	-2.7469	By MS/MS	By matching	By MS/MS	By matching
B1N559;C4M8N3;P32022;B1N3C7	903;924;911;926	B1N559;C4M8N3;P32022	C4M8N3	>tr|B1N559|B1N559_ENTHI Galactose-specific adhesin 170kD subunit, putative OS=Entamoeba histolytica OX=5759 GN=EHI_042370 PE=4 SV=1;>tr|C4M8N3|C4M8N3_ENTHI Galactose-specific adhesin 170kD subunit OS=Entamoeba histolytica OX=5759 GN=EHI_077500 PE=4 SV=1;>s	1	69.8117	0.000750706	78.516	51.262	69.812	1	46.6431	0.00421006	46.643	1	63.8162	0.00295517	63.816	1	50.3537	0.002461	50.354	1	78.5161	0.00144099	78.516	1	65.1792	0.000750706	65.179	1	69.8117	0.00193402	69.812		1;2	C	EAYCTYEITTRECKTCSLIETREKVQEVDLC;RSIFTYEITTRECKTCSLIETREKVQEVDLC	X;X;X;Carbamidomethyl (C);Propionamide_aa;X;X;X;X;X;X;X;X;Carbamidomethyl (C);NEM;NEM H2O;Propionamide_aa;X;Carbamidomethyl (C);X;X;X;X;X;X;X;NEM H2O;X;X;X;X;X;X;Carbamidomethyl (C);Propionamide_aa	XXXXXXXXXXXPPPPPPPPPPPXXXXXXXXX	TC(1)SLIETR	TC(69.81)SLIETR	2	2	-0.31651	By MS/MS	By MS/MS	By MS/MS	By MS/MS
B1N559;C4M8N3;P32022;B1N3C7	918;939;926;941	B1N559;C4M8N3;P32022	C4M8N3	>tr|B1N559|B1N559_ENTHI Galactose-specific adhesin 170kD subunit, putative OS=Entamoeba histolytica OX=5759 GN=EHI_042370 PE=4 SV=1;>tr|C4M8N3|C4M8N3_ENTHI Galactose-specific adhesin 170kD subunit OS=Entamoeba histolytica OX=5759 GN=EHI_077500 PE=4 SV=1;>s	1	110.735	1.32357e-97	283.01	251.13	110.74	1	98.0621	1.32357e-97	283.01	1	52.5758	2.22906e-07	101.61	1	63.998	2.27733e-68	275.83	1	98.9017	8.37633e-07	100.43	1	110.735	4.47508e-39	210.34	1	71.5575	2.5488e-10	116.86		1	C	CSLIETREKVQEVDLCAEETKNGGVPFKCKN	Carbamidomethyl (C);Propionamide_aa;X;X;X;X;X;X;X;NEM H2O;X;X;X;X;X;X;Carbamidomethyl (C);X;X;X;X;X;X;X;X;X;X;X;X;Carbamidomethyl (C);NEM H2O;Propionamide_aa;X	XXXXXXXPPPPPPPPPPPPPPPPPPPPPXXX	VQEVDLC(1)AEETKNGGVPFK	VQEVDLC(110.74)AEETKNGGVPFK	7	3	-0.57272	By MS/MS	By MS/MS	By MS/MS	By MS/MS
B1N559;C4LTM0;C4M8N3;P32022;B1N3C7	1174;1190;1195;1182;1197	B1N559;C4LTM0;C4M8N3;P32022	C4M8N3	>tr|B1N559|B1N559_ENTHI Galactose-specific adhesin 170kD subunit, putative OS=Entamoeba histolytica OX=5759 GN=EHI_042370 PE=4 SV=1;>tr|C4LTM0|C4LTM0_ENTHI Gal/GalNAc lectin heavy subunit OS=Entamoeba histolytica OX=5759 GN=EHI_012270 PE=4 SV=1;>tr|C4M8N3|	1	84.1883	1.84878e-08	116.84	113.91	84.188	1	116.837	1.84878e-08	116.84					1	72.2905	0.000142211	72.29					1	84.1883	3.29249e-05	84.188						2	C	TMYGETDKEYYDLDACGNCRVWNQTDRTQQL	X;X;X;X;X;X;X;X;X;X;X;X;X;X;X;Carbamidomethyl (C);X;X;Carbamidomethyl (C);X;X;X;X;X;X;X;X;X;X;X;X	XXXXXXXXPPPPPPPPPPPPXXXXXXXXXXX	EYYDLDAC(1)GNC(1)R	EYYDLDAC(84.19)GNC(84.19)R	8	2	0.019289	By MS/MS	By matching	By MS/MS	By matching
B1N559;C4LTM0;C4M8N3;P32022;B1N3C7	1177;1193;1198;1185;1200	B1N559;C4LTM0;C4M8N3;P32022	C4M8N3	>tr|B1N559|B1N559_ENTHI Galactose-specific adhesin 170kD subunit, putative OS=Entamoeba histolytica OX=5759 GN=EHI_042370 PE=4 SV=1;>tr|C4LTM0|C4LTM0_ENTHI Gal/GalNAc lectin heavy subunit OS=Entamoeba histolytica OX=5759 GN=EHI_012270 PE=4 SV=1;>tr|C4M8N3|	1	84.1883	1.84878e-08	116.84	113.91	84.188	1	116.837	1.84878e-08	116.84					1	72.2905	0.000142211	72.29					1	84.1883	3.29249e-05	84.188						2	C	GETDKEYYDLDACGNCRVWNQTDRTQQLNNH	X;X;X;X;X;X;X;X;X;X;X;X;Carbamidomethyl (C);X;X;Carbamidomethyl (C);X;X;X;X;X;X;X;X;X;X;X;X;X;X;X	XXXXXPPPPPPPPPPPPXXXXXXXXXXXXXX	EYYDLDAC(1)GNC(1)R	EYYDLDAC(84.19)GNC(84.19)R	11	2	0.019289	By MS/MS	By matching	By MS/MS	By matching
B1N559;C4M8N3	688;688	B1N559;C4M8N3	C4M8N3	>tr|B1N559|B1N559_ENTHI Galactose-specific adhesin 170kD subunit, putative OS=Entamoeba histolytica OX=5759 GN=EHI_042370 PE=4 SV=1;>tr|C4M8N3|C4M8N3_ENTHI Galactose-specific adhesin 170kD subunit OS=Entamoeba histolytica OX=5759 GN=EHI_077500 PE=4 SV=1	1	26.1118	2.1273e-08	152	121.21	26.112	1	63.6025	2.45953e-07	152	1	49.025	0.00271901	49.025	1	26.7026	2.37181e-08	114.87	1	47.5704	0.00317542	47.57	1	26.1118	2.1273e-08	117.09	1	100.037	6.57669e-07	100.04		1	C	KTEVKFAQDGKSENMCKQYYSTTCLNGKCVV;KTEVKFAQDGKSENMCKQYYSTTCLNGQCVV	NEM H2O;X;X;X;X;X;X;X;X;X;NEM H2O;X;X;X;Oxidation (M);Carbamidomethyl (C);X;X;X;X;X;X;X;Carbamidomethyl (C);X;X;X;X;Carbamidomethyl (C);X;X	XXXXXPPPPPPPPPPPPXXXXXXXXXXXXXX	FAQDGKSENMC(1)K	FAQDGKSENMC(26.11)K	11	2	0.10954	By MS/MS	By MS/MS	By MS/MS	By MS/MS
B1N559	755	B1N559	B1N559	>tr|B1N559|B1N559_ENTHI Galactose-specific adhesin 170kD subunit, putative OS=Entamoeba histolytica OX=5759 GN=EHI_042370 PE=4 SV=1	1	125.79	3.76116e-15	125.79	117.32	125.79	1	97.9405	3.77368e-10	105.65					1	69.845	6.15564e-07	69.845	0	0		NaN	1	125.79	3.76116e-15	125.79	1	26.2317	0.0540185	26.232		1;2	C	NFNGKCIKGNDNSYSCVFEKDVSSTSDNDIC	X;X;X;X;X;X;X;X;X;X;X;X;X;X;X;Carbamidomethyl (C);X;X;X;X;X;X;X;X;X;X;X;X;X;X;Carbamidomethyl (C)	XXXXXXXXPPPPPPPPPPPPPPPPPPPPPPP	GNDNSYSC(1)VFEKDVSSTSDNDIC(1)AK	GNDNSYSC(125.79)VFEKDVSSTSDNDIC(125.79)AK	8	3	-1.1529	By MS/MS	By matching	By MS/MS	By matching
B1N559;C4M8N3	69;69	B1N559;C4M8N3	C4M8N3	>tr|B1N559|B1N559_ENTHI Galactose-specific adhesin 170kD subunit, putative OS=Entamoeba histolytica OX=5759 GN=EHI_042370 PE=4 SV=1;>tr|C4M8N3|C4M8N3_ENTHI Galactose-specific adhesin 170kD subunit OS=Entamoeba histolytica OX=5759 GN=EHI_077500 PE=4 SV=1	1	40.4932	9.22554e-192	364.13	337.36	40.493	1	119.446	9.22554e-192	364.13					1	225.677	7.23178e-44	225.68	1	34.6924	0.0451208	34.692	1	40.4932	3.91832e-10	120.77						1;2	C	YYLAMQPWRHFVWTTCDKNDNTECYKYTINE	X;X;X;X;X;X;X;X;X;X;X;X;X;X;X;Carbamidomethyl (C);X;X;X;X;X;X;X;Carbamidomethyl (C);Propionamide_aa;X;X;X;X;X;X;X	XXXXXXXXXPPPPPPPPPPPPPPPPPXXXXX	HFVWTTC(1)DKNDNTEC(1)YK	HFVWTTC(40.49)DKNDNTEC(40.49)YK	7	2	-3.018	By MS/MS	By matching	By MS/MS	By matching
B1N559;C4M8N3	77;77	B1N559;C4M8N3	C4M8N3	>tr|B1N559|B1N559_ENTHI Galactose-specific adhesin 170kD subunit, putative OS=Entamoeba histolytica OX=5759 GN=EHI_042370 PE=4 SV=1;>tr|C4M8N3|C4M8N3_ENTHI Galactose-specific adhesin 170kD subunit OS=Entamoeba histolytica OX=5759 GN=EHI_077500 PE=4 SV=1	1	85.1608	9.22554e-192	364.13	337.36	85.161	1	76.2215	9.22554e-192	364.13					1	78.1127	7.23178e-44	225.68					1	85.1608	3.91832e-10	120.77						1;2	C	RHFVWTTCDKNDNTECYKYTINEDHNVKVED	X;X;X;X;X;X;X;Carbamidomethyl (C);X;X;X;X;X;X;X;Carbamidomethyl (C);X;X;X;X;X;X;X;X;X;X;X;NEM H2O;X;X;X	XPPPPPPPPPPPPPPPPPXXXXXXXXXXXXX	NDNTEC(1)YK	NDNTEC(85.16)YK	6	2	-0.35415	By MS/MS	By matching	By MS/MS	By matching
B1N559;C4M8N3	629;629	B1N559;C4M8N3	C4M8N3	>tr|B1N559|B1N559_ENTHI Galactose-specific adhesin 170kD subunit, putative OS=Entamoeba histolytica OX=5759 GN=EHI_042370 PE=4 SV=1;>tr|C4M8N3|C4M8N3_ENTHI Galactose-specific adhesin 170kD subunit OS=Entamoeba histolytica OX=5759 GN=EHI_077500 PE=4 SV=1	1	31.0425	8.1819e-08	130.61	109.22	31.043	1	31.0425	1.59941e-07	130.61					1	124.417	8.1819e-08	124.42	1	27.9668	0.0339069	27.967	1	122.639	6.81197e-08	122.64	0	0		NaN		1;2	C	QVQNGNYCDSNKHQICDYTGTTPKCKVSNCT	X;X;X;X;X;X;X;X;X;X;X;X;X;X;X;Carbamidomethyl (C);X;X;X;X;X;X;X;NEM H2O;Carbamidomethyl (C);NEM H2O;X;X;X;Carbamidomethyl (C);Propionamide_aa;X	XXXXXXXXXXXXPPPPPPPPPPPPPPXXXXX	HQIC(1)DYTGTTPKC(1)K	HQIC(31.04)DYTGTTPKC(31.04)K	4	3	-0.54461	By MS/MS	By matching	By MS/MS	By MS/MS
B1N559;C4LTM0;C4M8N3;P32022;B1N3C7	967;983;988;975;990	B1N559;C4LTM0;C4M8N3;P32022	C4M8N3	>tr|B1N559|B1N559_ENTHI Galactose-specific adhesin 170kD subunit, putative OS=Entamoeba histolytica OX=5759 GN=EHI_042370 PE=4 SV=1;>tr|C4LTM0|C4LTM0_ENTHI Gal/GalNAc lectin heavy subunit OS=Entamoeba histolytica OX=5759 GN=EHI_012270 PE=4 SV=1;>tr|C4M8N3|	1	70.0936	0.0001857	72.21	57.906	70.094	1	72.2096	0.0001857	72.21													1	70.0936	0.000198348	70.094						1	C	QEIVITEKDGIKTTTCKDTGKTTCDTNNKRI;QEIVITEKDGIKTTTCKNTTKTTCDTNNKRI	X;X;X;X;X;X;X;NEM H2O;X;X;X;NEM H2O;X;X;X;Carbamidomethyl (C);X;X;X;X;NEM H2O;X;X;Carbamidomethyl (C);Propionamide_aa;X;X;X;X;NEM H2O;X;X	PPPPPPPPPPPPPPPPPXXXXXXXXXXXXXX	IQEIVITEKDGIKTTTC(1)K	IQEIVITEKDGIKTTTC(70.09)K	17	3	-0.19902	By MS/MS	By matching	By matching	By matching
B1N559;C4LTM0;P32022;B1N3C7	738;732;724;739	B1N559;C4LTM0;P32022		>tr|B1N559|B1N559_ENTHI Galactose-specific adhesin 170kD subunit, putative OS=Entamoeba histolytica OX=5759 GN=EHI_042370 PE=4 SV=1;>tr|C4LTM0|C4LTM0_ENTHI Gal/GalNAc lectin heavy subunit OS=Entamoeba histolytica OX=5759 GN=EHI_012270 PE=4 SV=1;>sp|P32022|	1	89.542	2.10641e-06	168.22	117.42	89.542	1	90.6009	2.10641e-06	168.22	1	89.698	0.000222297	89.698	1	109.714	7.64921e-06	152.54	1	80.1654	0.000343235	80.165	1	89.542	3.47231e-06	141.27	1	65.4654	0.00106866	65.465		1	C	NIITYHDDCNSRKSQCGNFNGKCIKGNDNSY;NVITYHDDCDSRKSQCGNFNGKCQPNGDNSY;NVITYHDDCNSRKSQCGNFNGKCIKGNDNSY	X;X;X;X;X;X;X;X;Carbamidomethyl (C);X;X;X;NEM H2O;X;X;Carbamidomethyl (C);X;X;X;X;X;X;Carbamidomethyl (C);X;X;X;X;X;X;X;X	XXXXXXXXXXXXPPPPPPPPPPXXXXXXXXX	SQC(1)GNFNGK	SQC(89.54)GNFNGK	3	2	-0.85543	By MS/MS	By MS/MS	By MS/MS	By MS/MS
B1N559;C4LTM0;C4M8N3;P32022;B1N3C7	1128;1144;1149;1136;1151	B1N559;C4LTM0;C4M8N3;P32022	C4M8N3	>tr|B1N559|B1N559_ENTHI Galactose-specific adhesin 170kD subunit, putative OS=Entamoeba histolytica OX=5759 GN=EHI_042370 PE=4 SV=1;>tr|C4LTM0|C4LTM0_ENTHI Gal/GalNAc lectin heavy subunit OS=Entamoeba histolytica OX=5759 GN=EHI_012270 PE=4 SV=1;>tr|C4M8N3|	1	77.7461	4.05976e-77	269.33	249.09	77.746	1	88.7681	1.52189e-64	253.73	1	170.78	1.76954e-24	170.78	1	73.296	4.05976e-77	269.33	1	66.5682	8.1234e-24	161.08	1	77.7461	1.51162e-36	214.59	1	70.4105	7.00281e-24	162.79		1	C	TCDQTTGETIYTKKTCTVSEEFPTITPNQGR;TCNQTTGETIYTKKTCTVSEEFPTITPNQGR	X;Carbamidomethyl (C);Propionamide_aa;X;X;X;X;X;X;X;X;X;X;NEM H2O;NEM H2O;X;Carbamidomethyl (C);X;X;X;X;X;X;X;X;X;X;X;X;X;X;X	XXXXXXXXXXXXXPPPPPPPPPPPPPPPPPP	TC(1)TVSEEFPTITPNQGR	TC(77.75)TVSEEFPTITPNQGR	2	3	-0.30636	By MS/MS	By MS/MS	By MS/MS	By MS/MS
B1N559;C4LTM0;C4M8N3;P32022;B1N3C7	585;579;585;571;586	B1N559;C4LTM0;C4M8N3;P32022	C4M8N3	>tr|B1N559|B1N559_ENTHI Galactose-specific adhesin 170kD subunit, putative OS=Entamoeba histolytica OX=5759 GN=EHI_042370 PE=4 SV=1;>tr|C4LTM0|C4LTM0_ENTHI Gal/GalNAc lectin heavy subunit OS=Entamoeba histolytica OX=5759 GN=EHI_012270 PE=4 SV=1;>tr|C4M8N3|	1	137.205	1.64761e-45	230.07	209.12	166.52	1	126.813	1.64761e-45	230.07	1	28.3327	0.0179056	28.333	1	107.896	1.97932e-16	142.26	1	101.504	1.24078e-22	154.74	1	137.205	3.10469e-27	173.87	1	76.5265	2.38076e-07	99.092		2;3	C	AKCNLNTGMCENRLSCDTYSSCGGDSTGSVC	X;NEM H2O;Carbamidomethyl (C);Propionamide_aa;X;X;X;X;X;Oxidation (M);Carbamidomethyl (C);Propionamide_aa;X;X;X;X;X;Carbamidomethyl (C);X;X;X;X;X;Carbamidomethyl (C);Propionamide_aa;X;X;X;X;X;X;X;X;Carbamidomethyl (C)	XXXXXXXXXXXXXPPPPPPPPPPPPPPPPPP	LSC(1)DTYSSC(0.012)GGDSTGSVC(0.988)K	LSC(137.2)DTYSSC(-19.85)GGDSTGSVC(19.85)K	3	2	-1.058	By MS/MS	By MS/MS	By MS/MS	By MS/MS
B1N559;C4LTM0;C4M8N3;P32022;B1N3C7	591;585;591;577;592	B1N559;C4LTM0;C4M8N3;P32022	C4M8N3	>tr|B1N559|B1N559_ENTHI Galactose-specific adhesin 170kD subunit, putative OS=Entamoeba histolytica OX=5759 GN=EHI_042370 PE=4 SV=1;>tr|C4LTM0|C4LTM0_ENTHI Gal/GalNAc lectin heavy subunit OS=Entamoeba histolytica OX=5759 GN=EHI_012270 PE=4 SV=1;>tr|C4M8N3|	1	167.045	1.64761e-45	230.07	209.12	217.91	1	136.821	1.64761e-45	230.07	1	28.3327	0.0179056	28.333	1	64.7047	1.97932e-16	142.26	1	101.504	1.24078e-22	154.74	1	167.045	3.62461e-39	217.91	1	76.5265	2.38076e-07	99.092		2;3	C	TGMCENRLSCDTYSSCGGDSTGSVCKCDAST;TGMCENRLSCDTYSSCGGDSTGSVCKCDSTT	X;X;Oxidation (M);Carbamidomethyl (C);Propionamide_aa;X;X;X;X;X;Carbamidomethyl (C);Propionamide_aa;X;X;X;X;X;Carbamidomethyl (C);X;X;X;X;X;X;X;X;Carbamidomethyl (C);X;X;X;X;X;X	XXXXXXXPPPPPPPPPPPPPPPPPPPXXXXX	LSCDTYSSC(1)GGDSTGSVC(1)K	LSC(-167.04)DTYSSC(167.04)GGDSTGSVC(210.09)K	9	2	-1.6102	By MS/MS	By MS/MS	By MS/MS	By MS/MS
B1N559;C4LTM0;C4M8N3;P32022;B1N3C7	600;594;600;586;601	B1N559;C4LTM0;C4M8N3;P32022	C4M8N3	>tr|B1N559|B1N559_ENTHI Galactose-specific adhesin 170kD subunit, putative OS=Entamoeba histolytica OX=5759 GN=EHI_042370 PE=4 SV=1;>tr|C4LTM0|C4LTM0_ENTHI Gal/GalNAc lectin heavy subunit OS=Entamoeba histolytica OX=5759 GN=EHI_012270 PE=4 SV=1;>tr|C4M8N3|	1	210.091	1.64761e-45	230.07	209.12	217.91	1	176.911	1.64761e-45	230.07	1	28.3327	0.0179056	28.333	1	64.7047	1.97932e-16	142.26	1	101.504	1.24078e-22	154.74	1	210.091	3.62461e-39	217.91	1	76.5265	2.38076e-07	99.092		2;3	C	CDTYSSCGGDSTGSVCKCDASTGNQCKCNKV;CDTYSSCGGDSTGSVCKCDSTTGNKCQCNKV;CDTYSSCGGDSTGSVCKCDSTTNNQCQCTQV	Carbamidomethyl (C);Propionamide_aa;X;X;X;X;X;Carbamidomethyl (C);Propionamide_aa;X;X;X;X;X;X;X;X;Carbamidomethyl (C);X;X;X;X;X;X;X;X;X;X;X;X;X;X;X	PPPPPPPPPPPPPPPPPXXXXXXXXXXXXXX	LSCDTYSSC(1)GGDSTGSVC(1)K	LSC(-167.04)DTYSSC(167.04)GGDSTGSVC(210.09)K	18	2	-1.6102	By MS/MS	By MS/MS	By MS/MS	By MS/MS
B1N559;C4LTM0;C4M8N3;P32022;B1N3C7	168;171;168;154;169	B1N559;C4LTM0;C4M8N3;P32022	C4M8N3	>tr|B1N559|B1N559_ENTHI Galactose-specific adhesin 170kD subunit, putative OS=Entamoeba histolytica OX=5759 GN=EHI_042370 PE=4 SV=1;>tr|C4LTM0|C4LTM0_ENTHI Gal/GalNAc lectin heavy subunit OS=Entamoeba histolytica OX=5759 GN=EHI_012270 PE=4 SV=1;>tr|C4M8N3|	1	41.6209	5.57199e-33	223.58	207.2	41.621	1	24.9544	3.31912e-11	143.89	1	67.8972	0.00222045	67.897	1	33.8929	5.57199e-33	223.58	1	78.5161	0.00144099	78.516	1	41.6209	6.70308e-11	152.88	1	69.8246	0.00193329	69.825		1	C	NTKMTYATKTEAYDVCRMDFIGGRSITFRSF	X;X;X;X;X;X;X;X;NEM H2O;X;X;X;X;X;X;Carbamidomethyl (C);X;Oxidation (M);X;X;X;X;X;X;X;X;X;X;X;X;X	XXXPPPPPPPPPPPPPPPPPPPPPXXXXXXX	TEAYDVC(1)RMDFIGGR	TEAYDVC(41.62)RMDFIGGR	7	3	-0.44013	By MS/MS	By MS/MS	By MS/MS	By MS/MS
B1N559;C4M8N3;P32022;B1N3C7	1109;1130;1117;1132	B1N559;C4M8N3;P32022	C4M8N3	>tr|B1N559|B1N559_ENTHI Galactose-specific adhesin 170kD subunit, putative OS=Entamoeba histolytica OX=5759 GN=EHI_042370 PE=4 SV=1;>tr|C4M8N3|C4M8N3_ENTHI Galactose-specific adhesin 170kD subunit OS=Entamoeba histolytica OX=5759 GN=EHI_077500 PE=4 SV=1;>s	1	100.006	4.31201e-115	295.65	283.45	100.01	1	111.57	4.31201e-115	295.65	1	44.0536	0.0016294	44.054	1	35.5378	1.93204e-78	272.13	1	89.8587	1.22815e-06	89.859	1	100.006	2.06919e-65	250.94	1	104.837	1.32497e-10	118.52		1;2	C	IDTERSNANPKPRNPCETATCNQTTGETIYT	X;X;X;X;X;X;X;X;X;X;NEM H2O;X;X;X;X;Carbamidomethyl (C);X;X;X;X;Carbamidomethyl (C);Propionamide_aa;X;X;X;X;X;X;X;X;X;X	XXXXXXXXXXXXXPPPPPPPPPPPPPPPPPP	NPC(1)ETATC(1)NQTTGETIYTKK	NPC(100.01)ETATC(100.01)NQTTGETIYTKK	3	3	-0.0067182	By MS/MS	By MS/MS	By MS/MS	By MS/MS
B1N559;C4M8N3;P32022;B1N3C7	1114;1135;1122;1137	B1N559;C4M8N3;P32022	C4M8N3	>tr|B1N559|B1N559_ENTHI Galactose-specific adhesin 170kD subunit, putative OS=Entamoeba histolytica OX=5759 GN=EHI_042370 PE=4 SV=1;>tr|C4M8N3|C4M8N3_ENTHI Galactose-specific adhesin 170kD subunit OS=Entamoeba histolytica OX=5759 GN=EHI_077500 PE=4 SV=1;>s	1	100.006	4.31201e-115	295.65	283.45	100.01	1	111.57	4.31201e-115	295.65	1	44.0536	0.0016294	44.054	1	35.5378	1.93204e-78	272.13	1	89.8587	1.22815e-06	89.859	1	100.006	2.06919e-65	250.94	1	104.837	1.32497e-10	118.52		1;2	C	SNANPKPRNPCETATCNQTTGETIYTKKTCT	X;X;X;X;X;NEM H2O;X;X;X;X;Carbamidomethyl (C);Propionamide_aa;X;X;X;X;Carbamidomethyl (C);X;X;X;X;X;X;X;X;X;X;NEM H2O;NEM H2O;Propionamide_aa;X;Carbamidomethyl (C);Propionamide_aa;X	XXXXXXXXPPPPPPPPPPPPPPPPPPPPXXX	NPC(1)ETATC(1)NQTTGETIYTKK	NPC(100.01)ETATC(100.01)NQTTGETIYTKK	8	3	-0.0067182	By MS/MS	By MS/MS	By MS/MS	By MS/MS
B1N559;C4M8N3;P32022;B1N3C7	975;996;983;998	B1N559;C4M8N3;P32022	C4M8N3	>tr|B1N559|B1N559_ENTHI Galactose-specific adhesin 170kD subunit, putative OS=Entamoeba histolytica OX=5759 GN=EHI_042370 PE=4 SV=1;>tr|C4M8N3|C4M8N3_ENTHI Galactose-specific adhesin 170kD subunit OS=Entamoeba histolytica OX=5759 GN=EHI_077500 PE=4 SV=1;>s	1	62.2875	1.45874e-10	132.79	110.73	62.287	1	35.0369	1.45874e-10	132.79					1	69.92	0.000232128	69.92					1	62.2875	0.000720004	62.287						1	C	DGIKTTTCKNTTKTTCDTNNKRIEDARKAFI	X;X;X;NEM H2O;X;X;X;Carbamidomethyl (C);X;X;X;X;NEM H2O;X;X;Carbamidomethyl (C);X;X;X;X;NEM H2O;X;X;X;X;X;X;X;X;X;X	XXXXXXXXXPPPPPPPPPPPPPPPPPPXXXX	TTC(1)DTNNKRIEDAR	TTC(62.29)DTNNKRIEDAR	3	3	-0.26108	By MS/MS	By matching	By MS/MS	By matching
B1N559;C4M8N3	103;103	B1N559;C4M8N3	C4M8N3	>tr|B1N559|B1N559_ENTHI Galactose-specific adhesin 170kD subunit, putative OS=Entamoeba histolytica OX=5759 GN=EHI_042370 PE=4 SV=1;>tr|C4M8N3|C4M8N3_ENTHI Galactose-specific adhesin 170kD subunit OS=Entamoeba histolytica OX=5759 GN=EHI_077500 PE=4 SV=1	1	36.3447	7.7601e-07	112.94	81.067	36.345	1	36.3447	7.7601e-07	112.94	1	38.7825	0.0304576	38.783	1	66.5599	0.000214174	90.05	1	73.8866	0.000271901	73.887	1	51.7622	4.2376e-05	97.813	1	68.8469	0.000374768	68.847		1	C	VKVEDINKTNIKQDFCQKEYAYPIEKYEVDW	X;NEM H2O;X;X;X;X;X;X;X;X;X;NEM H2O;X;X;X;Carbamidomethyl (C);X;X;X;X;X;X;X;X;X;X;X;X;X;X;X	XXPPPPPPPPPPPPPPPPPPPPPPPPXXXXX	VEDINKTNIKQDFC(1)QK	VEDINKTNIKQDFC(36.34)QK	14	3	0.17261	By MS/MS	By MS/MS	By MS/MS	By MS/MS
B1N559;C4M8N3	470;470	B1N559;C4M8N3	C4M8N3	>tr|B1N559|B1N559_ENTHI Galactose-specific adhesin 170kD subunit, putative OS=Entamoeba histolytica OX=5759 GN=EHI_042370 PE=4 SV=1;>tr|C4M8N3|C4M8N3_ENTHI Galactose-specific adhesin 170kD subunit OS=Entamoeba histolytica OX=5759 GN=EHI_077500 PE=4 SV=1	1	46.0014	0.00433731	50.834	25.581	46.001	1	47.0971	0.00654999	47.097	0	0		NaN	1	50.8344	0.00433731	50.834	1	44.3175	0.00819563	44.318	1	46.0014	0.00719869	46.001	1	41.1171	0.0100905	41.117		1	C	CRDLEGCVVKQYNTSCEPKVKCMVPYCDNDK	Carbamidomethyl (C);Propionamide_aa;X;X;X;X;X;Carbamidomethyl (C);X;X;X;X;X;X;X;X;Carbamidomethyl (C);X;X;X;X;NEM H2O;Carbamidomethyl (C);Oxidation (M);X;X;X;Carbamidomethyl (C);X;X;X;X	XXXXXXXXXXPPPPPPPPPXXXXXXXXXXXX	QYNTSC(1)EPK	QYNTSC(46)EPK	6	2	-0.59305	By MS/MS	By matching	By MS/MS	By MS/MS
B1N559;C4LTM0;C4M8N3;P32022;B1N3C7	1073;1089;1094;1081;1096	B1N559;C4LTM0;C4M8N3;P32022	C4M8N3	>tr|B1N559|B1N559_ENTHI Galactose-specific adhesin 170kD subunit, putative OS=Entamoeba histolytica OX=5759 GN=EHI_042370 PE=4 SV=1;>tr|C4LTM0|C4LTM0_ENTHI Gal/GalNAc lectin heavy subunit OS=Entamoeba histolytica OX=5759 GN=EHI_012270 PE=4 SV=1;>tr|C4M8N3|	1	63.7268	3.33831e-13	175.01	137.04	63.727	1	145.493	3.33831e-13	175.01	1	89.6786	4.95161e-05	89.679	1	61.5322	2.50469e-10	138.21	1	104.221	1.55397e-06	104.22	1	63.7268	1.51779e-10	133.48	1	104.221	1.55397e-06	104.22		1	C	SEHFRTKSGVELNNACLKYKCVESKGSDGKI	X;X;X;X;X;X;NEM H2O;X;X;X;X;X;X;X;X;Carbamidomethyl (C);X;NEM H2O;X;NEM H2O;Carbamidomethyl (C);X;X;X;NEM H2O;X;X;X;X;NEM H2O;X	XXXXXPPPPPPPPPPPPPPPXXXXXXXXXXX	TKSGVELNNAC(1)LK	TKSGVELNNAC(63.73)LK	11	2	-0.76181	By MS/MS	By MS/MS	By MS/MS	By MS/MS
B1N559;C4LTM0;C4M8N3;P32022;B1N3C7	138;141;138;124;139	B1N559;C4LTM0;C4M8N3;P32022	C4M8N3	>tr|B1N559|B1N559_ENTHI Galactose-specific adhesin 170kD subunit, putative OS=Entamoeba histolytica OX=5759 GN=EHI_042370 PE=4 SV=1;>tr|C4LTM0|C4LTM0_ENTHI Gal/GalNAc lectin heavy subunit OS=Entamoeba histolytica OX=5759 GN=EHI_012270 PE=4 SV=1;>tr|C4M8N3|	1	93.7011	0.00327591	93.701	62.904	93.701	1	93.7011	0.00327591	93.701																							C	VDEQQIESVDINGKTCFKYAAKRPLAYVYLN;VDEQRIESVDINGKTCFKYAAKRPLAYVYLN	X;X;X;X;X;X;X;X;X;X;X;X;X;X;X;Carbamidomethyl (C);X;NEM H2O;X;X;X;NEM H2O;X;X;X;X;X;X;X;X;X	XXXXXXXXXXXXXXPPPPPPPPXXXXXXXXX	TC(1)FKYAAK	TC(93.7)FKYAAK	2	2	0.098344	By matching	By matching	By matching	By matching
B1N559;C4M8N3;P32022;B1N3C7	796;796;783;798	B1N559;C4M8N3;P32022	C4M8N3	>tr|B1N559|B1N559_ENTHI Galactose-specific adhesin 170kD subunit, putative OS=Entamoeba histolytica OX=5759 GN=EHI_042370 PE=4 SV=1;>tr|C4M8N3|C4M8N3_ENTHI Galactose-specific adhesin 170kD subunit OS=Entamoeba histolytica OX=5759 GN=EHI_077500 PE=4 SV=1;>s	1	56.493	2.7371e-30	161.02	140.07	56.493	1	115.574	2.7371e-30	161.02	0	0		NaN	1	55.2612	4.73122e-06	107.97	0	0		NaN	1	56.493	5.79545e-07	104.24	1	40.7788	0.00103724	40.779		1;3	C	DTTYRTYTYDSKTGTCKATVQPTPACSVCES	X;X;X;X;X;X;X;X;X;X;X;NEM H2O;X;X;X;Carbamidomethyl (C);NEM H2O;X;X;X;X;X;X;X;X;Carbamidomethyl (C);Propionamide_aa;X;X;Carbamidomethyl (C);NEM;Propionamide_aa;X;X	XXXXXPPPPPPPPPPPPPPPPPPPPPPPPPP	TYTYDSKTGTC(1)K	TYTYDSKTGTC(56.49)K	11	3	0.41398	By MS/MS	By matching	By MS/MS	By matching
B1N559	538	B1N559	B1N559	>tr|B1N559|B1N559_ENTHI Galactose-specific adhesin 170kD subunit, putative OS=Entamoeba histolytica OX=5759 GN=EHI_042370 PE=4 SV=1	1	77.7551	1.38899e-11	154.72	146.38	99.069	1	77.7551	1.63858e-11	153.7	0	0		NaN	1	73.8341	1.38899e-11	154.72	1	21.6664	0.000484112	57.973	1	71.0308	1.73674e-11	126.71	1	38.9953	0.00476943	38.995		1;2	C	KDKRGENMCTGKTNNCQEYVCDAEQRCSVRD	X;X;X;X;X;X;X;X;Carbamidomethyl (C);Propionamide_aa;X;X;X;X;X;X;Carbamidomethyl (C);X;X;X;X;Carbamidomethyl (C);Propionamide_aa;X;X;X;X;X;X;X;X;X;X	XXXXXXXXXXXXPPPPPPPPPPPPPPXXXXX	TNNC(1)QEYVCDAEQR	TNNC(77.76)QEYVC(-77.76)DAEQR	4	2	3.0302	By MS/MS	By matching	By MS/MS	By MS/MS
B1N559	543	B1N559	B1N559	>tr|B1N559|B1N559_ENTHI Galactose-specific adhesin 170kD subunit, putative OS=Entamoeba histolytica OX=5759 GN=EHI_042370 PE=4 SV=1	1	80.6165	1.38899e-11	154.72	146.38	119.65	1	89.9924	1.63858e-11	153.7	0	0		NaN	1	73.8341	1.38899e-11	154.72	1	21.6664	0.000484112	57.973	1	80.6165	1.73674e-11	126.71	1	38.9953	0.00476943	38.995		1;2	C	ENMCTGKTNNCQEYVCDAEQRCSVRDKVCVK	X;X;X;Carbamidomethyl (C);Propionamide_aa;X;X;X;X;X;X;Carbamidomethyl (C);Propionamide_aa;X;X;X;X;Carbamidomethyl (C);X;X;X;X;X;X;X;X;X;X;X;X;Carbamidomethyl (C);X;NEM H2O	XXXXXXXPPPPPPPPPPPPPPXXXXXXXXXX	TNNCQEYVC(1)DAEQR	TNNC(-80.62)QEYVC(80.62)DAEQR	9	2	0.58123	By MS/MS	By matching	By MS/MS	By MS/MS
B1N559;C4M8N3	671;671	B1N559;C4M8N3	C4M8N3	>tr|B1N559|B1N559_ENTHI Galactose-specific adhesin 170kD subunit, putative OS=Entamoeba histolytica OX=5759 GN=EHI_042370 PE=4 SV=1;>tr|C4M8N3|C4M8N3_ENTHI Galactose-specific adhesin 170kD subunit OS=Entamoeba histolytica OX=5759 GN=EHI_077500 PE=4 SV=1	1	166.904	9.98856e-47	233.97	207.19	166.9	1	79.6515	9.98856e-47	233.97	0	0		NaN	1	166.904	3.96793e-38	166.9	1	44.045	0.00125991	62.528	1	57.2884	6.78852e-06	98.156	1	75.3164	7.52801e-05	86.114		1	C	RCNETSKTTYWENVDCSKTEVKFAQDGKSEN	X;X;X;X;X;X;X;X;X;X;X;X;X;X;X;Carbamidomethyl (C);X;NEM H2O;X;X;X;X;X;X;X;X;X;NEM H2O;X;X;X	XXXXXXXPPPPPPPPPPPPPPPXXXXXXXXX	TTYWENVDC(1)SKTEVK	TTYWENVDC(166.9)SKTEVK	9	2	-0.038616	By MS/MS	By matching	By MS/MS	By MS/MS
B1N559;C4M8N3	856;856	B1N559;C4M8N3	C4M8N3	>tr|B1N559|B1N559_ENTHI Galactose-specific adhesin 170kD subunit, putative OS=Entamoeba histolytica OX=5759 GN=EHI_042370 PE=4 SV=1;>tr|C4M8N3|C4M8N3_ENTHI Galactose-specific adhesin 170kD subunit OS=Entamoeba histolytica OX=5759 GN=EHI_077500 PE=4 SV=1	1	157.222	2.29499e-11	157.22	127.48	157.22	1	156.727	2.7755e-11	156.73	1	86.9442	1.1503e-05	86.944	1	119.253	6.15612e-11	119.25	1	109.6	5.70933e-08	109.6	1	157.222	2.40017e-11	157.22	1	129.368	2.29499e-11	129.37		1	C	KDCVNEQCIPRTYVDCLGNDDNFKSIYNFYL	NEM H2O;X;Carbamidomethyl (C);Propionamide_aa;X;X;X;X;Carbamidomethyl (C);Propionamide_aa;X;X;X;X;X;X;X;Carbamidomethyl (C);X;X;X;X;X;X;X;X;X;X;X;X;X;X;X	XXXXXXXXXXXPPPPPPPPPPPPPXXXXXXX	TYVDC(1)LGNDDNFK	TYVDC(157.22)LGNDDNFK	5	2	-0.17458	By MS/MS	By MS/MS	By MS/MS	By MS/MS
B1N570	125	B1N570	B1N570	>tr|B1N570|B1N570_ENTHI Nicotinamide-nucleotide adenylyltransferase OS=Entamoeba histolytica OX=5759 GN=EHI_010950 PE=3 SV=1	1	45.661	0.00115292	58.132	37.185	45.661	1	54.27	0.00561592	54.27					1	58.1324	0.00115292	58.132					1	45.661	0.00566426	45.661						1	C	FIGADDLIPNMMNKNCWDQVLLEKIVNEFGI	X;X;X;X;X;X;X;X;X;X;X;X;X;X;X;Carbamidomethyl (C);X;X;X;X;X;X;X;X;X;X;X;X;X;X;X	XXXXXXXXXXXXXXPPPPPPPPPPXXXXXXX	NC(1)WDQVLLEK	NC(45.66)WDQVLLEK	2	2	-2.1014	By matching	By matching	By MS/MS	By matching
B1N570	150	B1N570	B1N570	>tr|B1N570|B1N570_ENTHI Nicotinamide-nucleotide adenylyltransferase OS=Entamoeba histolytica OX=5759 GN=EHI_010950 PE=3 SV=1	1	30.2054	0.0314426	30.205	18.484	30.205	1	30.2054	0.0314426	30.205					0	0		NaN					0	0		NaN						1	C	VNEFGIVFFKRTNPNCSEQIKSYPLFARHLN	X;X;X;X;X;X;X;X;X;X;X;X;X;X;X;Carbamidomethyl (C);X;X;X;X;X;X;X;X;X;X;X;X;X;X;X	XXXXXXXXXXXPPPPPPPPPPXXXXXXXXXX	TNPNC(1)SEQIK	TNPNC(30.21)SEQIK	5	2	-0.64262	By MS/MS	By matching	By matching	By matching
C4M0D3;B1N5A0	163;163	C4M0D3	C4M0D3	>tr|C4M0D3|C4M0D3_ENTHI Uncharacterized protein OS=Entamoeba histolytica OX=5759 GN=EHI_064670 PE=4 SV=1;>tr|B1N5A0|B1N5A0_ENTHI Uncharacterized protein OS=Entamoeba histolytica OX=5759 GN=EHI_073160 PE=4 SV=1	1	172.093	1.26419e-12	172.09	126.72	172.09	1	101.32	1.65753e-07	101.32					1	119.253	6.15612e-11	119.25					1	172.093	1.26419e-12	172.09						1	C	ADFCAFKITEYDGTTCAEARKSNKEACGLIL	X;X;X;X;X;X;X;X;X;X;X;X;X;X;X;Carbamidomethyl (C);X;X;X;X;X;X;X;X;X;X;X;X;X;X;X	XXXXXXXPPPPPPPPPPPPPXXXXXXXXXXX	ITEYDGTTC(1)AEAR	ITEYDGTTC(172.09)AEAR	9	2	-0.23819	By MS/MS	By matching	By MS/MS	By matching
C4M0D3;B1N5A0	93;93	C4M0D3	C4M0D3	>tr|C4M0D3|C4M0D3_ENTHI Uncharacterized protein OS=Entamoeba histolytica OX=5759 GN=EHI_064670 PE=4 SV=1;>tr|B1N5A0|B1N5A0_ENTHI Uncharacterized protein OS=Entamoeba histolytica OX=5759 GN=EHI_073160 PE=4 SV=1	1	40.9939	0.0154509	40.994	33.801	40.994	1	40.9939	0.0154509	40.994													0	0		NaN						1	C	NFYDLIGNKTNDDIYCRVLVNYRYSEPHLVY	X;X;X;X;X;X;X;X;X;X;X;X;X;X;X;Carbamidomethyl (C);X;X;X;X;X;X;X;X;X;X;X;X;X;X;X	XXXXXXXXXPPPPPPPPXXXXXXXXXXXXXX	TNDDIYC(1)R	TNDDIYC(40.99)R	7	2	-0.26841	By MS/MS	By matching	By matching	By matching
B1N5A3	101	B1N5A3	B1N5A3	>tr|B1N5A3|B1N5A3_ENTHI Uncharacterized protein OS=Entamoeba histolytica OX=5759 GN=EHI_029720 PE=4 SV=1	1	25.7007	0.0320418	25.701	7.8812	25.701																	1	25.7007	0.0320418	25.701						1	C	TALQSRKALMNTSYLCDEKETMREVSDKMIQ	X;X;X;X;X;X;X;X;X;Oxidation (M);X;X;X;X;X;Carbamidomethyl (C);X;X;X;X;X;X;X;X;X;X;X;X;X;X;X	XXXXXXXPPPPPPPPPPPPXXXXXXXXXXXX	ALMNTSYLC(1)DEK	ALMNTSYLC(25.7)DEK	9	2	-2.3716	By matching	By matching	By matching	By matching
B1N5A6	151	B1N5A6	B1N5A6	>tr|B1N5A6|B1N5A6_ENTHI Uncharacterized protein (Fragment) OS=Entamoeba histolytica OX=5759 GN=EHI_154450 PE=4 SV=1	1	212.848	5.18525e-44	212.85	191.89	212.85	1	33.9177	2.88108e-34	179.07					1	208.166	9.88078e-44	208.17	1	93.3708	9.84043e-07	93.371	1	212.848	5.18525e-44	212.85	1	62.9405	0.000139073	62.94		1	C	RAANLETTPAIFRPVCAYQAKVDIIGRDAPH	X;X;X;X;X;X;X;X;X;X;X;X;X;X;X;Carbamidomethyl (C);X;X;X;X;X;X;X;X;X;X;X;X;X;X;X	XPPPPPPPPPPPPPPPPPPPPXXXXXXXXXX	AANLETTPAIFRPVC(1)AYQAK	AANLETTPAIFRPVC(212.85)AYQAK	15	2	0.013595	By MS/MS	By matching	By MS/MS	By MS/MS
B1N5A6	65	B1N5A6	B1N5A6	>tr|B1N5A6|B1N5A6_ENTHI Uncharacterized protein (Fragment) OS=Entamoeba histolytica OX=5759 GN=EHI_154450 PE=4 SV=1	1	87.1385	5.95188e-36	164.83	151.52	87.138	1	77.7461	5.95188e-36	164.83					1	59.6726	2.80247e-22	138.78					1	87.1385	5.01167e-14	110.36						1	C	QSICKAGAISLFEQKCEPLPDEHTSVIGAIK	X;X;X;Carbamidomethyl (C);X;X;X;X;X;X;X;X;X;X;X;Carbamidomethyl (C);X;X;X;X;X;X;X;X;X;X;X;X;X;X;X	XXXXXPPPPPPPPPPPPPPPPPPPPPPPPPP	C(1)EPLPDEHTSVIGAIK	C(87.14)EPLPDEHTSVIGAIK	1	2	0.1381	By MS/MS	By matching	By MS/MS	By matching
B1N5A6	43	B1N5A6	B1N5A6	>tr|B1N5A6|B1N5A6_ENTHI Uncharacterized protein (Fragment) OS=Entamoeba histolytica OX=5759 GN=EHI_154450 PE=4 SV=1	1	90.5608	3.58805e-08	94.259	88.59	90.561	1	90.5608	3.58805e-08	94.259					1	78.272	1.15002e-06	93.583					1	25.257	0.0134528	43.233						4	C	VEGGKALVDEKQSPNCMSCGHCQSICKAGAI	X;X;X;X;X;X;X;X;X;X;X;X;X;X;X;Carbamidomethyl (C);X;X;Carbamidomethyl (C);X;X;Carbamidomethyl (C);X;X;X;Carbamidomethyl (C);X;X;X;X;X	XXXXXPPPPPPPPPPPPPPPPPPPPPPXXXX	QSPNC(1)MSC(1)GHC(1)QSIC(1)K	QSPNC(90.56)MSC(90.56)GHC(90.56)QSIC(90.56)K	5	2	-0.32147	By MS/MS	By matching	By MS/MS	By matching
B1N5A6	46	B1N5A6	B1N5A6	>tr|B1N5A6|B1N5A6_ENTHI Uncharacterized protein (Fragment) OS=Entamoeba histolytica OX=5759 GN=EHI_154450 PE=4 SV=1	1	90.5608	3.58805e-08	94.259	88.59	90.561	1	90.5608	3.58805e-08	94.259					1	78.272	1.15002e-06	93.583					1	25.257	0.0134528	43.233						4	C	GKALVDEKQSPNCMSCGHCQSICKAGAISLF	X;X;X;X;X;X;X;X;X;X;X;X;Carbamidomethyl (C);X;X;Carbamidomethyl (C);X;X;Carbamidomethyl (C);X;X;X;Carbamidomethyl (C);X;X;X;X;X;X;X;X	XXPPPPPPPPPPPPPPPPPPPPPPXXXXXXX	QSPNC(1)MSC(1)GHC(1)QSIC(1)K	QSPNC(90.56)MSC(90.56)GHC(90.56)QSIC(90.56)K	8	2	-0.32147	By MS/MS	By matching	By MS/MS	By matching
B1N5A6	49	B1N5A6	B1N5A6	>tr|B1N5A6|B1N5A6_ENTHI Uncharacterized protein (Fragment) OS=Entamoeba histolytica OX=5759 GN=EHI_154450 PE=4 SV=1	1	90.5608	3.58805e-08	94.259	88.59	90.561	1	90.5608	3.58805e-08	94.259					1	78.272	1.15002e-06	93.583					1	25.257	0.0134528	43.233						4	C	LVDEKQSPNCMSCGHCQSICKAGAISLFEQK	X;X;X;X;X;X;X;X;X;Carbamidomethyl (C);X;X;Carbamidomethyl (C);X;X;Carbamidomethyl (C);X;X;X;Carbamidomethyl (C);X;X;X;X;X;X;X;X;X;X;NEM H2O	PPPPPPPPPPPPPPPPPPPPPXXXXXXXXXX	QSPNC(1)MSC(1)GHC(1)QSIC(1)K	QSPNC(90.56)MSC(90.56)GHC(90.56)QSIC(90.56)K	11	2	-0.32147	By MS/MS	By matching	By MS/MS	By matching
B1N5A6	53	B1N5A6	B1N5A6	>tr|B1N5A6|B1N5A6_ENTHI Uncharacterized protein (Fragment) OS=Entamoeba histolytica OX=5759 GN=EHI_154450 PE=4 SV=1	1	90.5608	3.58805e-08	94.259	88.59	90.561	1	90.5608	3.58805e-08	94.259					1	78.272	1.15002e-06	93.583					1	25.257	0.0134528	43.233						4	C	KQSPNCMSCGHCQSICKAGAISLFEQKCEPL	X;X;X;X;X;Carbamidomethyl (C);X;X;Carbamidomethyl (C);X;X;Carbamidomethyl (C);X;X;X;Carbamidomethyl (C);X;X;X;X;X;X;X;X;X;X;NEM H2O;Carbamidomethyl (C);NEM;X;X;X	PPPPPPPPPPPPPPPPPXXXXXXXXXXXXXX	QSPNC(1)MSC(1)GHC(1)QSIC(1)K	QSPNC(90.56)MSC(90.56)GHC(90.56)QSIC(90.56)K	15	2	-0.32147	By MS/MS	By matching	By MS/MS	By matching
B1N5A6	111	B1N5A6	B1N5A6	>tr|B1N5A6|B1N5A6_ENTHI Uncharacterized protein (Fragment) OS=Entamoeba histolytica OX=5759 GN=EHI_154450 PE=4 SV=1	1	108.697	2.4871e-07	108.7	86.704	108.7	1	97.4517	5.9825e-07	101.3					1	85.8127	3.7774e-06	97.734					1	108.697	2.4871e-07	108.7	1	50.786	0.00216647	50.786		1	C	ELKEMINLIKFAPSACNYRPIKFMVINRPKL	X;X;X;X;Oxidation (M);X;X;X;X;X;X;X;X;X;X;Carbamidomethyl (C);X;X;X;X;X;X;X;Oxidation (M);X;X;X;X;X;X;X	XXXXXXXXXXPPPPPPPPPPPPXXXXXXXXX	FAPSAC(1)NYRPIK	FAPSAC(108.7)NYRPIK	6	3	0.92362	By MS/MS	By matching	By MS/MS	By matching
B1N5A6	205	B1N5A6	B1N5A6	>tr|B1N5A6|B1N5A6_ENTHI Uncharacterized protein (Fragment) OS=Entamoeba histolytica OX=5759 GN=EHI_154450 PE=4 SV=1	1	94.6921	2.42481e-05	94.692	74.485	94.692	0	0		NaN					1	73.4995	0.000231776	73.499					1	94.6921	2.42481e-05	94.692						1	C	ELELALVSKGYGSFWCGFMKVLLKDPYAMEY	X;X;X;X;X;X;X;X;X;X;X;X;X;X;X;Carbamidomethyl (C);X;X;Oxidation (M);X;X;X;X;X;X;X;X;X;Oxidation (M);X;X	XXXXXXXXXPPPPPPPPPPPXXXXXXXXXXX	GYGSFWC(1)GFMK	GYGSFWC(94.69)GFMK	7	2	-0.41368	By matching	By matching	By MS/MS	By matching
B1N5A8	208	B1N5A8	B1N5A8	>tr|B1N5A8|B1N5A8_ENTHI Peroxiredoxin OS=Entamoeba histolytica OX=5759 GN=EHI_123390 PE=3 SV=1	1	32.8222	1.9635e-71	255.22	246.38	32.822	1	108.085	1.9635e-71	255.22					1	48.6546	5.43149e-31	172.02	1	39.9048	0.00178448	39.905	1	32.8222	5.40967e-30	159.47	0	0		NaN		1	C	RIVKAIQFSDEHGAVCPLNWKPGKDTIEPTS	X;X;X;X;X;X;X;X;X;X;X;X;X;X;X;Carbamidomethyl (C);X;X;X;X;NEM H2O;X;X;X;X;X;X;X;X;X;X	XXXXPPPPPPPPPPPPPPPPPPPPPPPPPPP	AIQFSDEHGAVC(1)PLNWKPGKDTIEPTSDGIK	AIQFSDEHGAVC(32.82)PLNWKPGKDTIEPTSDGIK	12	5	-0.54591	By MS/MS	By matching	By MS/MS	By MS/MS
B1N5A8;C4M6Q4	56;57	B1N5A8;C4M6Q4	B1N5A8	>tr|B1N5A8|B1N5A8_ENTHI Peroxiredoxin OS=Entamoeba histolytica OX=5759 GN=EHI_123390 PE=3 SV=1;>tr|C4M6Q4|C4M6Q4_ENTHI Peroxiredoxin OS=Entamoeba histolytica OX=5759 GN=EHI_201250 PE=3 SV=1	1	65.4225	4.46464e-31	174.68	160.89	65.423	1	57.5952	5.02352e-26	174.68	1	38.2271	3.2583e-05	91.313	1	104.731	4.46464e-31	167.53	1	60.3172	5.96595e-05	84.507	1	65.4225	1.60769e-21	145.04	1	27.271	1.17965e-05	97.163		1;2	C	AQIGKEAPEFKAPAYCPCGSIKEIDINEYKG	X;X;X;X;NEM H2O;X;X;X;X;X;NEM H2O;X;X;X;X;Carbamidomethyl (C);X;Carbamidomethyl (C);NEM;NEM H2O;Propionamide_aa;X;X;X;NEM H2O;X;X;X;X;X;X;X;X;X	PPPPPPPPPPPPPPPPPPPPPPPPPPPPPPP	EAPEFKAPAYC(1)PC(1)GSIK	EAPEFKAPAYC(65.42)PC(65.42)GSIK	11	2	1.3791	By MS/MS	By MS/MS	By MS/MS	By MS/MS
B1N5A8;C4M6Q4	58;59	B1N5A8;C4M6Q4	B1N5A8	>tr|B1N5A8|B1N5A8_ENTHI Peroxiredoxin OS=Entamoeba histolytica OX=5759 GN=EHI_123390 PE=3 SV=1;>tr|C4M6Q4|C4M6Q4_ENTHI Peroxiredoxin OS=Entamoeba histolytica OX=5759 GN=EHI_201250 PE=3 SV=1	1	65.4225	4.46464e-31	174.68	160.89	65.423	1	57.5952	5.02352e-26	174.68	1	38.2271	3.2583e-05	91.313	1	104.731	4.46464e-31	167.53	1	60.3172	5.96595e-05	84.507	1	65.4225	1.60769e-21	145.04	1	27.271	3.16442e-05	91.549		1;2	C	IGKEAPEFKAPAYCPCGSIKEIDINEYKGKY	X;X;NEM H2O;X;X;X;X;X;NEM H2O;X;X;X;X;Carbamidomethyl (C);NEM;NEM H2O;Propionamide_aa;X;Carbamidomethyl (C);X;X;X;NEM H2O;X;X;X;X;X;X;X;X;X;X;X	PPPPPPPPPPPPPPPPPPPPPPPPPPPPPPX	EAPEFKAPAYC(1)PC(1)GSIK	EAPEFKAPAYC(65.42)PC(65.42)GSIK	13	2	1.3791	By MS/MS	By MS/MS	By MS/MS	By MS/MS
B1N5A8;C4MBP3;C4MA54;C4M3Q0;B1N5L9	19;19;19;19;19	B1N5A8;C4MBP3	C4MBP3	>tr|B1N5A8|B1N5A8_ENTHI Peroxiredoxin OS=Entamoeba histolytica OX=5759 GN=EHI_123390 PE=3 SV=1;>tr|C4MBP3|C4MBP3_ENTHI Peroxiredoxin, putative OS=Entamoeba histolytica OX=5759 GN=EHI_122310 PE=3 SV=1;>tr|C4MA54|C4MA54_ENTHI Peroxiredoxin OS=Entamoeba histo	1	94.0899	1.50998e-12	143.5	143.5	94.09	1	143.502	1.50998e-12	143.5					1	70.5516	0.000444868	70.552					1	94.0899	1.94734e-07	94.09						2;5;6	C	NQQKECCKKECQEKECCKECCCPRIKAFKKF	X;X;X;NEM H2O;Propionamide_aa;X;Carbamidomethyl (C);NEM H2O;Propionamide_aa;Carbamidomethyl (C);NEM;NEM H2O;Propionamide_aa;NEM H2O;Propionamide_aa;Propionamide_aa;X;Carbamidomethyl (C);Propionamide_aa;X;X;X;X;Carbamidomethyl (C);Carbamidomethyl (C);NEM;X;X;Carbamidomethyl (C);Carbamidomethyl (C);NEM;NEM H2O;Propionamide_aa;Carbamidomethyl (C);X;X;X;X;X;X;X;NEM H2O;X	XXXXXXXXXPPPPPPPPPPPPPPPXXXXXXX	EC(1)QEKEC(1)C(1)KEC(1)C(1)C(1)PR	EC(94.09)QEKEC(94.09)C(94.09)KEC(94.09)C(94.09)C(94.09)PR	7	3	-0.095233	By MS/MS	By matching	By MS/MS	By matching
B1N5A8;C4MBP3;C4MA54;C4M3Q0;B1N5L9	20;20;20;20;20	B1N5A8;C4MBP3	C4MBP3	>tr|B1N5A8|B1N5A8_ENTHI Peroxiredoxin OS=Entamoeba histolytica OX=5759 GN=EHI_123390 PE=3 SV=1;>tr|C4MBP3|C4MBP3_ENTHI Peroxiredoxin, putative OS=Entamoeba histolytica OX=5759 GN=EHI_122310 PE=3 SV=1;>tr|C4MA54|C4MA54_ENTHI Peroxiredoxin OS=Entamoeba histo	1	94.0899	1.50998e-12	143.5	143.5	94.09	1	143.502	1.50998e-12	143.5					1	70.5516	0.000444868	70.552					1	94.0899	1.94734e-07	94.09						5;6	C	QQKECCKKECQEKECCKECCCPRIKAFKKFI	X;X;NEM H2O;Propionamide_aa;X;Carbamidomethyl (C);NEM H2O;Propionamide_aa;Carbamidomethyl (C);NEM;NEM H2O;Propionamide_aa;NEM H2O;Propionamide_aa;Propionamide_aa;X;Carbamidomethyl (C);Propionamide_aa;X;X;X;X;Carbamidomethyl (C);Carbamidomethyl (C);X;X;Carbamidomethyl (C);Carbamidomethyl (C);NEM;NEM H2O;Propionamide_aa;Carbamidomethyl (C);X;X;X;X;X;X;X;NEM H2O;X;X	XXXXXXXXPPPPPPPPPPPPPPPXXXXXXXX	EC(1)QEKEC(1)C(1)KEC(1)C(1)C(1)PR	EC(94.09)QEKEC(94.09)C(94.09)KEC(94.09)C(94.09)C(94.09)PR	8	3	-0.095233	By MS/MS	By matching	By MS/MS	By matching
B1N5A8;C4MBP3;C4MA54;C4M3Q0;B1N5L9	23;23;23;23;23	B1N5A8;C4MBP3	C4MBP3	>tr|B1N5A8|B1N5A8_ENTHI Peroxiredoxin OS=Entamoeba histolytica OX=5759 GN=EHI_123390 PE=3 SV=1;>tr|C4MBP3|C4MBP3_ENTHI Peroxiredoxin, putative OS=Entamoeba histolytica OX=5759 GN=EHI_122310 PE=3 SV=1;>tr|C4MA54|C4MA54_ENTHI Peroxiredoxin OS=Entamoeba histo	1	94.0899	1.50998e-12	143.5	143.5	94.09	1	143.502	1.50998e-12	143.5					1	70.5516	0.000444868	70.552					1	94.0899	1.94734e-07	94.09						5;6	C	ECCKKECQEKECCKECCCPRIKAFKKFINTF	X;Carbamidomethyl (C);NEM H2O;Propionamide_aa;Carbamidomethyl (C);NEM;NEM H2O;Propionamide_aa;NEM H2O;Propionamide_aa;Propionamide_aa;X;Carbamidomethyl (C);Propionamide_aa;X;X;X;X;Carbamidomethyl (C);Carbamidomethyl (C);NEM;X;X;Carbamidomethyl (C);Carbamidomethyl (C);NEM;NEM H2O;Propionamide_aa;Carbamidomethyl (C);X;X;X;X;X;X;X;NEM H2O;X;X;X;X;X	XXXXXPPPPPPPPPPPPPPPXXXXXXXXXXX	EC(1)QEKEC(1)C(1)KEC(1)C(1)C(1)PR	EC(94.09)QEKEC(94.09)C(94.09)KEC(94.09)C(94.09)C(94.09)PR	11	3	-0.095233	By MS/MS	By matching	By MS/MS	By matching
B1N5A8;C4MBP3;C4MA54;C4M3Q0;B1N5L9	24;24;24;24;24	B1N5A8;C4MBP3	C4MBP3	>tr|B1N5A8|B1N5A8_ENTHI Peroxiredoxin OS=Entamoeba histolytica OX=5759 GN=EHI_123390 PE=3 SV=1;>tr|C4MBP3|C4MBP3_ENTHI Peroxiredoxin, putative OS=Entamoeba histolytica OX=5759 GN=EHI_122310 PE=3 SV=1;>tr|C4MA54|C4MA54_ENTHI Peroxiredoxin OS=Entamoeba histo	1	94.0899	1.50998e-12	143.5	143.5	94.09	1	143.502	1.50998e-12	143.5					1	70.5516	0.000444868	70.552					1	94.0899	1.94734e-07	94.09						5;6	C	CCKKECQEKECCKECCCPRIKAFKKFINTFE	Carbamidomethyl (C);NEM H2O;Propionamide_aa;Carbamidomethyl (C);NEM;NEM H2O;Propionamide_aa;NEM H2O;Propionamide_aa;Propionamide_aa;X;Carbamidomethyl (C);Propionamide_aa;X;X;X;X;Carbamidomethyl (C);Carbamidomethyl (C);NEM;X;X;Carbamidomethyl (C);Carbamidomethyl (C);Carbamidomethyl (C);X;X;X;X;X;X;X;NEM H2O;X;X;X;X;X;X	XXXXPPPPPPPPPPPPPPPXXXXXXXXXXXX	EC(1)QEKEC(1)C(1)KEC(1)C(1)C(1)PR	EC(94.09)QEKEC(94.09)C(94.09)KEC(94.09)C(94.09)C(94.09)PR	12	3	-0.095233	By MS/MS	By matching	By MS/MS	By matching
B1N5A8;C4MBP3;C4MA54;C4M3Q0;B1N5L9	25;25;25;25;25	B1N5A8;C4MBP3	C4MBP3	>tr|B1N5A8|B1N5A8_ENTHI Peroxiredoxin OS=Entamoeba histolytica OX=5759 GN=EHI_123390 PE=3 SV=1;>tr|C4MBP3|C4MBP3_ENTHI Peroxiredoxin, putative OS=Entamoeba histolytica OX=5759 GN=EHI_122310 PE=3 SV=1;>tr|C4MA54|C4MA54_ENTHI Peroxiredoxin OS=Entamoeba histo	1	94.0899	1.50998e-12	143.5	143.5	94.09	1	143.502	1.50998e-12	143.5					1	70.5516	0.000444868	70.552					1	94.0899	1.94734e-07	94.09						5;6	C	CKKECQEKECCKECCCPRIKAFKKFINTFEK	Carbamidomethyl (C);NEM;NEM H2O;Propionamide_aa;NEM H2O;Propionamide_aa;Propionamide_aa;X;Carbamidomethyl (C);Propionamide_aa;X;X;X;X;Carbamidomethyl (C);Carbamidomethyl (C);NEM;X;X;Carbamidomethyl (C);Carbamidomethyl (C);NEM;NEM H2O;Propionamide_aa;Carbamidomethyl (C);X;X;X;X;X;X;X;NEM H2O;X;X;X;X;X;X;NEM H2O	XXXPPPPPPPPPPPPPPPXXXXXXXXXXXXX	EC(1)QEKEC(1)C(1)KEC(1)C(1)C(1)PR	EC(94.09)QEKEC(94.09)C(94.09)KEC(94.09)C(94.09)C(94.09)PR	13	3	-0.095233	By MS/MS	By matching	By MS/MS	By matching
B1N5A8;C4MBP3;C4MA54;C4M3Q0;B1N5L9	14;14;14;14;14	B1N5A8;C4MBP3	C4MBP3	>tr|B1N5A8|B1N5A8_ENTHI Peroxiredoxin OS=Entamoeba histolytica OX=5759 GN=EHI_123390 PE=3 SV=1;>tr|C4MBP3|C4MBP3_ENTHI Peroxiredoxin, putative OS=Entamoeba histolytica OX=5759 GN=EHI_122310 PE=3 SV=1;>tr|C4MA54|C4MA54_ENTHI Peroxiredoxin OS=Entamoeba histo	1	94.0899	1.50998e-12	113.65	109.43	94.09	1	105.74	1.50998e-12	113.65													1	94.0899	1.94734e-07	94.09						2;5;6	C	__MSCNQQKECCKKECQEKECCKECCCPRIK	X;X;X;X;Carbamidomethyl (C);NEM H2O;Propionamide_aa;X;X;X;NEM H2O;Propionamide_aa;X;Carbamidomethyl (C);NEM H2O;Propionamide_aa;Carbamidomethyl (C);NEM;NEM H2O;Propionamide_aa;NEM H2O;Propionamide_aa;Propionamide_aa;X;Carbamidomethyl (C);X;X;X;X;Carbamidomethyl (C);Carbamidomethyl (C);NEM;X;X;Carbamidomethyl (C);Carbamidomethyl (C);NEM;NEM H2O;Propionamide_aa;Carbamidomethyl (C);X;X;X;X	XXXXXXXXXXXXXXPPPPPPPPPPPPPPPXX	EC(1)QEKEC(1)C(1)KEC(1)C(1)C(1)PR	EC(94.09)QEKEC(94.09)C(94.09)KEC(94.09)C(94.09)C(94.09)PR	2	3	-0.095233	By MS/MS	By matching	By matching	By matching
B1N5A8;C4M6Q4;C4MAR7;B1N623;C4MBP3;C4MA54;B1N5L9	106;107;102;65;106;106;106	B1N5A8;C4M6Q4;C4MAR7;C4MBP3	C4MBP3	>tr|B1N5A8|B1N5A8_ENTHI Peroxiredoxin OS=Entamoeba histolytica OX=5759 GN=EHI_123390 PE=3 SV=1;>tr|C4M6Q4|C4M6Q4_ENTHI Peroxiredoxin OS=Entamoeba histolytica OX=5759 GN=EHI_201250 PE=3 SV=1;>tr|C4MAR7|C4MAR7_ENTHI Peroxiredoxin OS=Entamoeba histolytica OX=	1	117.959	3.51659e-35	170.53	146.32	124.57	1	149.769	3.51659e-35	170.53					1	117.959	9.35972e-17	124.57					1	69.4919	2.21945e-07	69.492						2;3	C	MIGYSELAGQLKEINCEVIGVSVDSVYCHQA	X;X;X;X;X;X;X;X;X;X;X;X;X;X;X;Carbamidomethyl (C);X;X;X;X;X;X;X;X;X;X;X;Carbamidomethyl (C);NEM;X;X;X	XXXXXXXXXXXXPPPPPPPPPPPPPPPPPPP	EINC(1)EVIGVSVDSVYC(0.067)HQAWC(0.933)EADKSK	EINC(117.96)EVIGVSVDSVYC(-11.43)HQAWC(11.43)EADKSK	4	4	-0.21275	By MS/MS	By matching	By MS/MS	By matching
B1N5A8;C4M6Q4;C4MAR7;B1N623;C4MBP3;C4MA54;B1N5L9	118;119;114;77;118;118;118	B1N5A8;C4M6Q4;C4MAR7;C4MBP3	C4MBP3	>tr|B1N5A8|B1N5A8_ENTHI Peroxiredoxin OS=Entamoeba histolytica OX=5759 GN=EHI_123390 PE=3 SV=1;>tr|C4M6Q4|C4M6Q4_ENTHI Peroxiredoxin OS=Entamoeba histolytica OX=5759 GN=EHI_201250 PE=3 SV=1;>tr|C4MAR7|C4MAR7_ENTHI Peroxiredoxin OS=Entamoeba histolytica OX=	1	69.4919	3.61925e-26	156.47	144.87	69.492	1	123.188	3.61925e-26	156.47					1	78.3192	7.95886e-15	122.51					1	69.4919	2.21945e-07	69.492						2;3	C	EINCEVIGVSVDSVYCHQAWCEADKSKGGVG	X;X;X;Carbamidomethyl (C);X;X;X;X;X;X;X;X;X;X;X;Carbamidomethyl (C);X;X;X;X;Carbamidomethyl (C);NEM;X;X;X;X;X;X;X;X;X;X	PPPPPPPPPPPPPPPPPPPPPPPPPPPXXXX	EINC(1)EVIGVSVDSVYC(1)HQAWC(1)EADKSK	EINC(69.49)EVIGVSVDSVYC(69.49)HQAWC(69.49)EADKSK	16	4	-0.43511	By MS/MS	By matching	By MS/MS	By matching
B1N5A8;C4M6Q4;C4MAR7;B1N623;C4MBP3;C4MA54;B1N5L9	123;124;119;82;123;123;123	B1N5A8;C4M6Q4;C4MAR7;C4MBP3	C4MBP3	>tr|B1N5A8|B1N5A8_ENTHI Peroxiredoxin OS=Entamoeba histolytica OX=5759 GN=EHI_123390 PE=3 SV=1;>tr|C4M6Q4|C4M6Q4_ENTHI Peroxiredoxin OS=Entamoeba histolytica OX=5759 GN=EHI_201250 PE=3 SV=1;>tr|C4MAR7|C4MAR7_ENTHI Peroxiredoxin OS=Entamoeba histolytica OX=	1	69.4919	3.51659e-35	170.53	146.32	69.492	1	123.188	3.51659e-35	170.53					1	78.3192	9.35972e-17	124.57					1	69.4919	2.21945e-07	69.492						1;2;3	C	VIGVSVDSVYCHQAWCEADKSKGGVGKLTFP	X;X;X;X;X;X;X;X;X;X;Carbamidomethyl (C);NEM;X;X;X;X;Carbamidomethyl (C);X;X;X;X;X;X;X;X;X;X;NEM H2O;X;X;X;X	PPPPPPPPPPPPPPPPPPPPPPXXXXXXXXX	EINC(1)EVIGVSVDSVYC(1)HQAWC(1)EADKSK	EINC(69.49)EVIGVSVDSVYC(69.49)HQAWC(69.49)EADKSK	21	4	-0.43511	By MS/MS	By matching	By MS/MS	By matching
B1N5A8;C4M6Q4;C4MAR7;C4MBP3;C4MA54;C4M3Q0;B1N5L9	3;3;3;3;3;3;3	B1N5A8;C4M6Q4;C4MAR7;C4MBP3	C4MBP3	>tr|B1N5A8|B1N5A8_ENTHI Peroxiredoxin OS=Entamoeba histolytica OX=5759 GN=EHI_123390 PE=3 SV=1;>tr|C4M6Q4|C4M6Q4_ENTHI Peroxiredoxin OS=Entamoeba histolytica OX=5759 GN=EHI_201250 PE=3 SV=1;>tr|C4MAR7|C4MAR7_ENTHI Peroxiredoxin OS=Entamoeba histolytica OX=	1	91.3133	1.05618e-49	240.37	211.46	91.313	1	198.573	1.05618e-49	215.87	1	120.062	0.00057946	120.06	1	91.3133	8.23003e-15	183.03					1	73.4995	6.03696e-38	240.37	0	0		NaN		2;3	C	_____________MSCNQQKECCKKECQEKE	X;X;X;X;X;X;X;X;X;X;X;X;X;X;X;Carbamidomethyl (C);X;X;X;NEM H2O;Propionamide_aa;X;Carbamidomethyl (C);NEM H2O;Propionamide_aa;Carbamidomethyl (C);NEM;NEM H2O;Propionamide_aa;NEM H2O;Propionamide_aa;Propionamide_aa;X;Carbamidomethyl (C);Propionamide_aa;X;X;X;X	XXXXXXXXXXXXXXPPPPPPPPPPPXXXXXX	SC(1)NQQKEC(1)C(1)KK	SC(91.31)NQQKEC(91.31)C(91.31)KK	2	2	-1.2183	By MS/MS	By MS/MS	By MS/MS	By matching
B1N5A8;C4M6Q4;C4MAR7;C4MBP3;C4MA54;C4M3Q0;B1N5L9	9;9;9;9;9;9;9	B1N5A8;C4M6Q4;C4MAR7;C4MBP3	C4MBP3	>tr|B1N5A8|B1N5A8_ENTHI Peroxiredoxin OS=Entamoeba histolytica OX=5759 GN=EHI_123390 PE=3 SV=1;>tr|C4M6Q4|C4M6Q4_ENTHI Peroxiredoxin OS=Entamoeba histolytica OX=5759 GN=EHI_201250 PE=3 SV=1;>tr|C4MAR7|C4MAR7_ENTHI Peroxiredoxin OS=Entamoeba histolytica OX=	1	91.3133	1.05618e-49	240.37	211.46	91.313	1	198.573	1.05618e-49	215.87	1	120.062	0.00057946	120.06	1	91.3133	8.23003e-15	183.03					1	73.4995	6.03696e-38	240.37	0	0		NaN		2;3	C	_______MSCNQQKECCKKECQEKECCCPRI;_______MSCNQQKECCKKECQEKECCKECC;_______MSCNQQKECCKKECQEKECQEKEC	X;X;X;X;X;X;X;X;X;Carbamidomethyl (C);NEM H2O;Propionamide_aa;X;X;X;NEM H2O;Propionamide_aa;X;Carbamidomethyl (C);Carbamidomethyl (C);NEM;NEM H2O;Propionamide_aa;NEM H2O;Propionamide_aa;Propionamide_aa;X;Carbamidomethyl (C);Propionamide_aa;X;X;X;X;Carbamidomethyl (C);NEM H2O;Carbamidomethyl (C);NEM;Propionamide_aa;Carbamidomethyl (C);NEM;X;Carbamidomethyl (C);Carbamidomethyl (C);NEM;NEM H2O;Propi…	XXXXXXXXPPPPPPPPPPPXXXXXXXXXXXX	SC(1)NQQKEC(1)C(1)KK	SC(91.31)NQQKEC(91.31)C(91.31)KK	8	2	-1.2183	By MS/MS	By MS/MS	By MS/MS	By matching
B1N5A8;C4M6Q4;C4MAR7;C4MBP3;C4MA54;C4M3Q0;B1N5L9	10;10;10;10;10;10;10	B1N5A8;C4M6Q4;C4MAR7;C4MBP3	C4MBP3	>tr|B1N5A8|B1N5A8_ENTHI Peroxiredoxin OS=Entamoeba histolytica OX=5759 GN=EHI_123390 PE=3 SV=1;>tr|C4M6Q4|C4M6Q4_ENTHI Peroxiredoxin OS=Entamoeba histolytica OX=5759 GN=EHI_201250 PE=3 SV=1;>tr|C4MAR7|C4MAR7_ENTHI Peroxiredoxin OS=Entamoeba histolytica OX=	1	91.3133	1.05618e-49	240.37	211.46	91.313	1	198.573	1.05618e-49	215.87	1	120.062	0.00057946	120.06	1	91.3133	8.23003e-15	183.03					1	73.4995	6.03696e-38	240.37	0	0		NaN		2;3	C	______MSCNQQKECCKKECQEKECCCPRIK;______MSCNQQKECCKKECQEKECCKECCC;______MSCNQQKECCKKECQEKECQEKECC	X;X;X;X;X;X;X;X;Carbamidomethyl (C);NEM H2O;Propionamide_aa;X;X;X;NEM H2O;X;Carbamidomethyl (C);NEM H2O;Propionamide_aa;Carbamidomethyl (C);NEM H2O;X;X;Carbamidomethyl (C);Propionamide_aa;X;X;X;X;Carbamidomethyl (C);NEM H2O;Carbamidomethyl (C);NEM;Propionamide_aa;Carbamidomethyl (C);NEM;X;Carbamidomethyl (C);Carbamidomethyl (C);NEM;NEM H2O;Propionamide_aa;Carbamidomethyl (C);NEM;Propionamide_aa	XXXXXXXPPPPPPPPPPPXXXXXXXXXXXXX	SC(1)NQQKEC(1)C(1)KK	SC(91.31)NQQKEC(91.31)C(91.31)KK	9	2	-1.2183	By MS/MS	By MS/MS	By MS/MS	By matching
B1N5C2;B1N574;C4LUZ4	631;632;577	B1N5C2;C4LUZ4	C4LUZ4	>tr|B1N5C2|B1N5C2_ENTHI Protein kinase domain-containing protein (Fragment) OS=Entamoeba histolytica OX=5759 GN=EHI_128800 PE=4 SV=1;>tr|B1N574|B1N574_ENTHI Protein kinase domain containing protein OS=Entamoeba histolytica OX=5759 GN=EHI_195370 PE=4 SV=1;>	0.998158	28.8107	0.0322706	30.564	16.329	30.564	0.998158	28.8107	0.0322706	30.564					0	0		NaN														1	C	IELKCKDNQQLDNNKCINETCEEGKIKDQNG	X;X;X;X;X;X;X;X;X;X;X;X;X;X;X;Carbamidomethyl (C);X;X;X;X;Propionamide_aa;X;X;X;X;X;X;X;X;X;X	XXXXXXXXXXXXXXXPPPPPPPPPPXXXXXX	C(0.998)INETC(0.002)EEGK	C(28.81)INETC(-28.81)EEGK	1	2	-0.50623	By MS/MS	By matching	By matching	By matching
B1N5I9	155	B1N5I9	B1N5I9	>tr|B1N5I9|B1N5I9_ENTHI Rac-like GTP-binding protein RAC2, putative OS=Entamoeba histolytica OX=5759 GN=EHI_013650 PE=3 SV=1	1	70.0564	0.0042161	70.056	38.767	70.056	0	0		NaN					1	63.4265	0.00664274	63.426					1	70.0564	0.0042161	70.056						1	C	GEKMAKELKAKRYVECTSKDYETTHNVVLAA	X;X;X;X;X;X;X;X;X;X;X;X;X;X;X;Carbamidomethyl (C);X;X;X;X;X;X;X;X;X;X;X;X;X;X;X	XXXXXXXXXXXPPPPPPPPXXXXXXXXXXXX	RYVEC(1)TSK	RYVEC(70.06)TSK	5	2	-1.1411	By matching	By matching	By MS/MS	By matching
B1N5Y5	145	B1N5Y5	B1N5Y5	>tr|B1N5Y5|B1N5Y5_ENTHI DNAJ homolog subfamily A member 2, putative (Fragment) OS=Entamoeba histolytica OX=5759 GN=EHI_073780 PE=3 SV=1	0.942664	12.6298	0.0415669	27.303	7.7068	27.303					0	0		NaN	0	0		NaN	0	0		NaN	0	0		NaN	0.942664	12.6298	0.0415669	27.303		1	C	KTFKRKIKHDVLCSKCKGKGTKSGKDVKKCQ	X;X;X;X;X;X;X;X;Propionamide_aa;X;X;X;NEM;X;NEM H2O;Carbamidomethyl (C);X;X;X;X;X;X;X;X;X;X;X;X;X;X;X	XXXXXXXXPPPPPPPPPXXXXXXXXXXXXXX	HDVLC(0.057)SKC(0.943)K	HDVLC(-12.63)SKC(12.63)K	8	3	1.9613	By matching	By matching	By matching	By matching
C4LSA0	8	C4LSA0	C4LSA0	>tr|C4LSA0|C4LSA0_ENTHI 60S ribosomal protein L24, putative OS=Entamoeba histolytica OX=5759 GN=EHI_030760 PE=3 SV=1	1	49.5946	0.00048169	55.718	40.22	49.595	1	51.1266	0.00048169	55.011	1	36.3447	0.00911118	36.345	1	34.1824	0.00131196	55.718					1	49.5946	0.00150071	52.391	1	46.4104	0.00215682	46.41		1	C	________MSIKTQVCAFSGFKIPVAKGRKY	X;X;X;X;X;X;X;X;X;X;X;X;X;X;X;Carbamidomethyl (C);X;X;X;X;X;X;X;X;X;X;X;X;X;X;X	XXXXXXXXXXXXPPPPPPPPPPPPPPPXXXX	TQVC(1)AFSGFKIPVAK	TQVC(49.59)AFSGFKIPVAK	4	3	-0.61851	By MS/MS	By MS/MS	By MS/MS	By matching
C4LSA8	301	C4LSA8	C4LSA8	>tr|C4LSA8|C4LSA8_ENTHI Uncharacterized protein OS=Entamoeba histolytica OX=5759 GN=EHI_153160 PE=4 SV=1	1	82.4494	5.61576e-10	119.96	105.79	82.449	1	119.961	5.61576e-10	119.96	0	0		NaN	1	82.4494	6.76391e-05	82.449	0	0		NaN	0	0		NaN						1	C	LDGTFDDSLRQGNSSCVGTEYAYLIMKKLDM	X;X;X;X;X;X;X;X;X;X;X;X;X;X;X;Carbamidomethyl (C);X;X;X;X;X;X;X;X;X;X;X;X;X;X;Oxidation (M)	XXXXXXXXXXPPPPPPPPPPPPPPPPPXXXX	QGNSSC(1)VGTEYAYLIMK	QGNSSC(82.45)VGTEYAYLIMK	6	2	0.12744	By MS/MS	By matching	By MS/MS	By matching
C4LSB1	163	C4LSB1	C4LSB1	>tr|C4LSB1|C4LSB1_ENTHI Proteasome subunit alpha type OS=Entamoeba histolytica OX=5759 GN=EHI_153190 PE=2 SV=1	1	48.6226	0.00154999	48.623	41.719	48.623					0	0		NaN													1	48.6226	0.00154999	48.623		1	C	LWRSDPAGSVAAFRGCAAGEKEQEAFNNLEK	X;X;X;X;X;X;X;X;X;X;X;X;X;X;X;Carbamidomethyl (C);X;X;X;X;X;X;X;X;X;X;X;X;X;X;X	XXXXXXXXXXXXXXPPPPPPPPPPPPPPPPP	GC(1)AAGEKEQEAFNNLEK	GC(48.62)AAGEKEQEAFNNLEK	2	3	0.32787	By matching	By matching	By matching	By matching
C4LSC4;C4LVN9;C4M574	100;95;95	C4LSC4;C4LVN9;C4M574	C4LVN9	>tr|C4LSC4|C4LSC4_ENTHI 40S ribosomal protein S12, putative OS=Entamoeba histolytica OX=5759 GN=EHI_153330 PE=3 SV=1;>tr|C4LVN9|C4LVN9_ENTHI 40S ribosomal protein S12 OS=Entamoeba histolytica OX=5759 GN=EHI_186720 PE=3 SV=1;>tr|C4M574|C4M574_ENTHI 40S ribo	1	97.7338	8.91822e-06	97.734	65.319	97.734					1	67.385	0.000436627	67.385	0	0		NaN	1	50.3537	0.00320623	50.354	0	0		NaN	1	97.7338	8.91822e-06	97.734		1	C	VKVPEKIQLGEWTNQCKIRDGVAVNIAKCSC;VMVPQKIQLGEWTNQCKIRDGAAVRIAKCSC	X;Oxidation (M);X;X;X;X;X;X;X;X;X;X;X;X;X;Carbamidomethyl (C);X;X;X;X;X;X;X;X;X;X;X;X;Carbamidomethyl (C);NEM;X;Carbamidomethyl (C)	XXXXXXPPPPPPPPPPPXXXXXXXXXXXXXX	IQLGEWTNQC(1)K	IQLGEWTNQC(97.73)K	10	2	-0.23554	By matching	By MS/MS	By matching	By MS/MS
C4LSD9	74	C4LSD9	C4LSD9	>tr|C4LSD9|C4LSD9_ENTHI Translation initiation factor 2 beta subunit, putative OS=Entamoeba histolytica OX=5759 GN=EHI_153480 PE=2 SV=1	1	102.731	8.7752e-31	156.52	129.81	102.73	1	156.517	8.7752e-31	156.52					1	113.757	2.52978e-09	113.76					1	102.731	1.95346e-08	102.73						1	C	GLYTYDELLDRIFAQCNISQNSSKQEIELPQ	X;X;X;X;X;X;X;X;X;X;X;X;X;X;X;Carbamidomethyl (C);X;X;X;X;X;X;X;X;X;X;X;X;X;X;X	XXXXXXXXXXXPPPPPPPPPPPPPXXXXXXX	IFAQC(1)NISQNSSK	IFAQC(102.73)NISQNSSK	5	2	1.5499	By MS/MS	By matching	By MS/MS	By matching
C4LSD9	164	C4LSD9	C4LSD9	>tr|C4LSD9|C4LSD9_ENTHI Translation initiation factor 2 beta subunit, putative OS=Entamoeba histolytica OX=5759 GN=EHI_153480 PE=2 SV=1	1	153.739	1.40676e-07	153.74	135.92	153.74	1	96.5513	6.10927e-06	96.551					0	0		NaN					1	153.739	1.40676e-07	153.74						1;2	C	QLENILIKYVSQFVQCPECKSLDTELIKENR	X;X;X;X;X;X;X;X;X;X;X;X;X;X;X;Carbamidomethyl (C);X;X;Carbamidomethyl (C);NEM;X;X;X;X;X;X;X;X;X;X;X;X	XXXXXXXXPPPPPPPPPPPPXXXXXXXXXXX	YVSQFVQC(1)PEC(1)K	YVSQFVQC(153.74)PEC(153.74)K	8	2	-0.38853	By MS/MS	By matching	By matching	By matching
C4LSD9	167	C4LSD9	C4LSD9	>tr|C4LSD9|C4LSD9_ENTHI Translation initiation factor 2 beta subunit, putative OS=Entamoeba histolytica OX=5759 GN=EHI_153480 PE=2 SV=1	1	153.739	1.40676e-07	153.74	135.92	153.74	1	96.5513	6.10927e-06	96.551					0	0		NaN					1	153.739	1.40676e-07	153.74						2	C	NILIKYVSQFVQCPECKSLDTELIKENRINF	X;X;X;X;X;X;X;X;X;X;X;X;Carbamidomethyl (C);X;X;Carbamidomethyl (C);X;X;X;X;X;X;X;X;X;X;X;X;X;X;X	XXXXXPPPPPPPPPPPPXXXXXXXXXXXXXX	YVSQFVQC(1)PEC(1)K	YVSQFVQC(153.74)PEC(153.74)K	11	2	-0.38853	By MS/MS	By matching	By matching	By matching
C4LSE0	684	C4LSE0	C4LSE0	>tr|C4LSE0|C4LSE0_ENTHI Inositol polyphosphate 5-phosphatase, putative OS=Entamoeba histolytica OX=5759 GN=EHI_153490 PE=3 SV=1	1	47.8688	0.00993516	47.869	30.356	47.869																					1	47.8688	0.00993516	47.869		1	C	PDSLIPSSRFYDVTTCKTKVDAYAVVNSLPN	X;X;X;X;X;X;X;X;X;X;X;X;X;X;X;Carbamidomethyl (C);X;X;X;X;X;X;X;X;X;X;X;X;X;X;X	XXXXXXXXXPPPPPPPPXXXXXXXXXXXXXX	FYDVTTC(1)K	FYDVTTC(47.87)K	7	2	0.93185	By matching	By matching	By matching	By matching
C4LSE2	393	C4LSE2	C4LSE2	>tr|C4LSE2|C4LSE2_ENTHI Rho guanine nucleotide exchange factor, putative OS=Entamoeba histolytica OX=5759 GN=EHI_153510 PE=4 SV=1	1	27.0013	0.036504	27.001	17.644	27.001									1	20.7388	0.0417493	20.739					1	27.0013	0.036504	27.001						2	C	CSRNKVKNGNSYERTCDICFKRMCAENKDII	X;X;X;X;X;X;X;X;X;X;X;X;X;X;X;Carbamidomethyl (C);X;X;Carbamidomethyl (C);X;X;X;X;X;X;X;X;X;X;X;X	XXXXXXXXXXXXXXPPPPPPPPXXXXXXXXX	TC(1)DIC(1)FKR	TC(27)DIC(27)FKR	2	3	2.1447	By matching	By matching	By MS/MS	By matching
C4LSE2	396	C4LSE2	C4LSE2	>tr|C4LSE2|C4LSE2_ENTHI Rho guanine nucleotide exchange factor, putative OS=Entamoeba histolytica OX=5759 GN=EHI_153510 PE=4 SV=1	1	27.0013	0.036504	27.001	17.644	27.001									1	20.7388	0.0417493	20.739					1	27.0013	0.036504	27.001						2	C	NKVKNGNSYERTCDICFKRMCAENKDIISTQ	X;X;X;X;X;X;X;X;X;X;X;X;Carbamidomethyl (C);X;X;Carbamidomethyl (C);X;X;X;X;X;X;X;X;X;X;X;X;X;X;X	XXXXXXXXXXXPPPPPPPPXXXXXXXXXXXX	TC(1)DIC(1)FKR	TC(27)DIC(27)FKR	5	3	2.1447	By matching	By matching	By MS/MS	By matching
C4LVM2;C4LSE7	36;36	C4LVM2	C4LVM2	>tr|C4LVM2|C4LVM2_ENTHI Acid phosphatase OS=Entamoeba histolytica OX=5759 GN=EHI_103800 PE=3 SV=1;>tr|C4LSE7|C4LSE7_ENTHI Acid phosphatase OS=Entamoeba histolytica OX=5759 GN=EHI_153650 PE=1 SV=1	1	54.8342	1.74237e-05	75.533	70.068	54.834	1	75.5325	1.74237e-05	75.533					1	51.8762	0.000515166	51.876					1	54.8342	0.000259125	54.834						2	C	MKKVIQNHHLTEKYICDSAGTCSYHEGQQAD	Oxidation (M);X;X;X;X;X;X;X;X;X;X;X;X;X;X;Carbamidomethyl (C);X;X;X;X;X;Carbamidomethyl (C);X;X;X;X;X;X;X;X;X	XXXXXXXXXXXXXPPPPPPPPPPPPPPPPPP	YIC(1)DSAGTC(1)SYHEGQQADSR	YIC(54.83)DSAGTC(54.83)SYHEGQQADSR	3	3	0.83348	By MS/MS	By matching	By MS/MS	By matching
C4LVM2;C4LSE7	42;42	C4LVM2	C4LVM2	>tr|C4LVM2|C4LVM2_ENTHI Acid phosphatase OS=Entamoeba histolytica OX=5759 GN=EHI_103800 PE=3 SV=1;>tr|C4LSE7|C4LSE7_ENTHI Acid phosphatase OS=Entamoeba histolytica OX=5759 GN=EHI_153650 PE=1 SV=1	1	54.8342	1.74237e-05	75.533	70.068	54.834	1	75.5325	1.74237e-05	75.533					1	51.8762	0.000515166	51.876					1	54.8342	0.000259125	54.834						2	C	NHHLTEKYICDSAGTCSYHEGQQADSRMRKV	X;X;X;X;X;X;X;X;X;Carbamidomethyl (C);X;X;X;X;X;Carbamidomethyl (C);X;X;X;X;X;X;X;X;X;X;X;X;X;X;X	XXXXXXXPPPPPPPPPPPPPPPPPPPPXXXX	YIC(1)DSAGTC(1)SYHEGQQADSR	YIC(54.83)DSAGTC(54.83)SYHEGQQADSR	9	3	0.83348	By MS/MS	By matching	By MS/MS	By matching
C4LSF2	489	C4LSF2	C4LSF2	>tr|C4LSF2|C4LSF2_ENTHI Long-chain-fatty-acid--CoA ligase, putative OS=Entamoeba histolytica OX=5759 GN=EHI_153720 PE=4 SV=1	1	51.7598	0.00341278	51.76	47.234	51.76					1	51.7598	0.00341278	51.76																		1	C	DEAMTKASFTDDGYFCTGDVGRINYDGSISI	X;X;X;X;X;X;X;X;X;X;X;X;X;X;X;Carbamidomethyl (C);X;X;X;X;X;X;X;X;X;X;X;X;X;X;X	XXXXXXPPPPPPPPPPPPPPPPXXXXXXXXX	ASFTDDGYFC(1)TGDVGR	ASFTDDGYFC(51.76)TGDVGR	10	2	0.45156	By matching	By MS/MS	By matching	By matching
C4LSF2	154	C4LSF2	C4LSF2	>tr|C4LSF2|C4LSF2_ENTHI Long-chain-fatty-acid--CoA ligase, putative OS=Entamoeba histolytica OX=5759 GN=EHI_153720 PE=4 SV=1	1	37.6964	0.0157449	37.696	12.137	37.696													1	29.755	0.0355559	29.755					1	37.6964	0.0157449	37.696		1	C	ALDYIVKKLELKYLFCSPISKGIELAEKNPS	X;X;X;X;X;X;X;X;X;X;X;X;X;X;X;Carbamidomethyl (C);X;X;X;X;X;X;X;X;X;X;X;X;X;X;X	XXXXXXXXXXXXPPPPPPPPPXXXXXXXXXX	YLFC(1)SPISK	YLFC(37.7)SPISK	4	2	0.12684	By matching	By matching	By matching	By MS/MS
C4LSG7	3	C4LSG7	C4LSG7	>tr|C4LSG7|C4LSG7_ENTHI Protein RFT1 homolog OS=Entamoeba histolytica OX=5759 GN=EHI_151240 PE=3 SV=1	1	74.9873	8.33333e-05	74.987	66.986	74.987	1	67.0193	0.000227377	67.019					1	74.9873	8.33333e-05	74.987					1	74.9873	0.00250085	74.987						1	C	_____________MNCPQQTVGGALRGIASS	X;X;X;X;X;X;X;X;X;X;X;X;X;X;X;Carbamidomethyl (C);X;X;X;X;X;X;X;X;X;X;X;X;X;X;X	XXXXXXXXXXXXXPPPPPPPPPPPPPXXXXX	MNC(1)PQQTVGGALR	MNC(74.99)PQQTVGGALR	3	2	0.61509	By MS/MS	By matching	By MS/MS	By matching
C4LSH0;C4M834	215;210	C4LSH0;C4M834	C4LSH0	>tr|C4LSH0|C4LSH0_ENTHI Rap/Ran GTPase activating protein, putative OS=Entamoeba histolytica OX=5759 GN=EHI_151270 PE=4 SV=1;>tr|C4M834|C4M834_ENTHI Rap/Ran GTPase activating protein, putative OS=Entamoeba histolytica OX=5759 GN=EHI_108700 PE=4 SV=1	1	35.6521	0.0208447	35.652	25.515	35.652	0	0		NaN	0	0		NaN					0	0		NaN	0	0		NaN	1	35.6521	0.0208447	35.652		1	C	VNDEDANGKTFLYYACEKSYRGLVEMLINKG;VNDEDATGRTFLYYACEKNYKNLCEFLINKG	X;X;X;X;X;X;X;X;X;X;X;X;X;X;X;Carbamidomethyl (C);X;X;X;X;X;X;X;X;X;X;X;X;X;X;X	XXXXXXXXXPPPPPPPPPXXXXXXXXXXXXX	TFLYYAC(1)EK	TFLYYAC(35.65)EK	7	2	3.3951	By matching	By matching	By matching	By matching
C4LSH6	30	C4LSH6	C4LSH6	>tr|C4LSH6|C4LSH6_ENTHI Uncharacterized protein OS=Entamoeba histolytica OX=5759 GN=EHI_151330 PE=4 SV=1	1	22.4917	0.0474225	22.492	16.457	22.492									0	0		NaN	1	21.3001	0.0491494	21.3	0	0		NaN	1	22.4917	0.0474225	22.492		1	C	KYFITKDDYKNVVMVCKKFKDTIDKFHYNPI	X;X;X;X;X;X;X;X;X;X;X;X;X;Oxidation (M);X;Carbamidomethyl (C);NEM H2O;NEM H2O;X;X;X;X;X;X;X;X;X;X;X;X;X	XXXXXXXXXXPPPPPPPPXXXXXXXXXXXXX	NVVMVC(1)KK	NVVMVC(22.49)KK	6	2	0.62413	By matching	By matching	By matching	By MS/MS
C4LSH9	638	C4LSH9	C4LSH9	>tr|C4LSH9|C4LSH9_ENTHI WD domain containing protein OS=Entamoeba histolytica OX=5759 GN=EHI_151370 PE=4 SV=1	1	39.8484	0.0346166	39.848	14.022	39.848																	1	39.8484	0.0346166	39.848						1	C	NLDKKTKKVIQTKSICVSPAGKTLSILTDAG	X;X;X;X;X;X;X;X;X;X;X;X;X;X;X;Carbamidomethyl (C);X;X;X;X;X;X;X;X;X;X;X;X;X;X;X	XXXXXXXXXXXXXPPPPPPPPPXXXXXXXXX	SIC(1)VSPAGK	SIC(39.85)VSPAGK	3	2	-1.8962	By matching	By matching	By matching	By matching
C4LSI8;C4M3G8	83;87	C4LSI8;C4M3G8	C4M3G8	>tr|C4LSI8|C4LSI8_ENTHI Uncharacterized protein OS=Entamoeba histolytica OX=5759 GN=EHI_151460 PE=4 SV=1;>tr|C4M3G8|C4M3G8_ENTHI Uncharacterized protein OS=Entamoeba histolytica OX=5759 GN=EHI_017630 PE=4 SV=1	1	38.7917	0.00186515	90.986	77.314	38.792	1	90.9856	0.00186515	90.986					1	43.1235	0.0432049	43.124	0	0		NaN	1	38.7917	0.0546583	38.792	0	0		NaN		1	C	ISQLIDYLIDREIEECFRTPSSIFRRNSIFT;LKQFIKYLIVREIEECFRTPQAIFKRNSTYL	X;X;X;X;X;X;X;X;X;X;X;X;X;X;X;Carbamidomethyl (C);X;X;X;X;X;X;X;X;X;X;X;X;X;X;X	XXXXXXXXXXXPPPPPPPXXXXXXXXXXXXX	EIEEC(1)FR	EIEEC(38.79)FR	5	2	0.49241	By MS/MS	By matching	By matching	By matching
C4LSK1;B1N3F1	75;75	C4LSK1	C4LSK1	>tr|C4LSK1|C4LSK1_ENTHI Helicase, putative OS=Entamoeba histolytica OX=5759 GN=EHI_151600 PE=4 SV=1;>tr|B1N3F1|B1N3F1_ENTHI ATP-dependent RNA helicase DDX39, putative OS=Entamoeba histolytica OX=5759 GN=EHI_150160 PE=4 SV=1	1	100.223	2.60744e-06	100.22	66.96	100.22	1	28.3607	0.000965913	55.261	0	0		NaN	1	82.5048	5.13801e-05	82.505	0	0		NaN	1	100.223	2.60744e-06	100.22						1	C	QSQVIPKALLKQDILCQAKSGMGKTAVFVIS	X;X;X;X;X;X;X;X;X;X;X;X;X;X;X;Carbamidomethyl (C);X;X;X;X;X;X;X;X;X;X;X;X;X;X;X	XXXXXXXPPPPPPPPPPPPXXXXXXXXXXXX	ALLKQDILC(1)QAK	ALLKQDILC(100.22)QAK	9	2	0.63898	By MS/MS	By matching	By MS/MS	By matching
C4LSK1;B1N3F1	51;51	C4LSK1	C4LSK1	>tr|C4LSK1|C4LSK1_ENTHI Helicase, putative OS=Entamoeba histolytica OX=5759 GN=EHI_151600 PE=4 SV=1;>tr|B1N3F1|B1N3F1_ENTHI ATP-dependent RNA helicase DDX39, putative OS=Entamoeba histolytica OX=5759 GN=EHI_150160 PE=4 SV=1	1	26.5003	0.000139972	52.898	42.133	26.5	1	52.898	0.000139972	52.898					1	26.5003	0.0108894	26.5														1	C	SNMNLKKEILMAITDCGFEHPSEVQSQVIPK	X;X;X;X;X;X;X;X;X;X;X;X;X;X;X;Carbamidomethyl (C);X;X;X;X;X;X;X;X;X;X;X;X;X;X;X	XXXXXXXPPPPPPPPPPPPPPPPPPPPPPPP	EILMAITDC(1)GFEHPSEVQSQVIPK	EILMAITDC(26.5)GFEHPSEVQSQVIPK	9	3	0.82862	By MS/MS	By matching	By MS/MS	By matching
C4LSK1;B1N3F1	129;129	C4LSK1	C4LSK1	>tr|C4LSK1|C4LSK1_ENTHI Helicase, putative OS=Entamoeba histolytica OX=5759 GN=EHI_151600 PE=4 SV=1;>tr|B1N3F1|B1N3F1_ENTHI ATP-dependent RNA helicase DDX39, putative OS=Entamoeba histolytica OX=5759 GN=EHI_150160 PE=4 SV=1	1	73.2332	0.00382101	73.233	27.553	73.233	1	53.7564	0.0106168	53.756					1	73.2332	0.00382101	73.233					1	46.9941	0.0281066	46.994	1	46.9941	0.0281066	46.994		1	C	AVQVQKEFDRMKKRLCEATGKEITTGTFVGG	X;X;X;X;X;X;X;X;X;X;X;X;X;X;X;Carbamidomethyl (C);X;X;X;X;X;X;X;X;X;X;X;X;X;X;X	XXXXXXXXXXXXXPPPPPPPPXXXXXXXXXX	RLC(1)EATGK	RLC(73.23)EATGK	3	2	0.88716	By MS/MS	By matching	By MS/MS	By matching
C4LSK1	306	C4LSK1	C4LSK1	>tr|C4LSK1|C4LSK1_ENTHI Helicase, putative OS=Entamoeba histolytica OX=5759 GN=EHI_151600 PE=4 SV=1	1	66.2667	0.00024091	76.728	61.629	66.267	1	59.1984	0.000890103	59.198					1	66.2667	0.00024091	76.728	0	0		NaN	1	66.2667	0.000419219	66.267	1	59.1984	0.000890103	59.198		1	C	RCRVLVKKLKQIGYPCGILYGRMDQEIREKE	X;X;X;X;X;X;X;X;X;X;X;X;X;X;X;Carbamidomethyl (C);X;X;X;X;X;X;Oxidation (M);X;X;X;X;X;X;NEM H2O;X	XXXXXXXXPPPPPPPPPPPPPPXXXXXXXXX	QIGYPC(1)GILYGR	QIGYPC(66.27)GILYGR	6	2	1.0133	By MS/MS	By matching	By MS/MS	By matching
C4LSK1	339	C4LSK1	C4LSK1	>tr|C4LSK1|C4LSK1_ENTHI Helicase, putative OS=Entamoeba histolytica OX=5759 GN=EHI_151600 PE=4 SV=1	1	64.82	5.01355e-06	83.869	46.223	64.82	1	34.6924	0.00714849	34.692					1	83.8686	5.01355e-06	83.869					1	64.82	0.00113606	64.82						1	C	RFRDGESRVLVSTDLCGRGIDVAKVNLVVNF	X;X;X;X;X;X;X;X;X;X;X;X;X;X;X;Carbamidomethyl (C);X;X;X;X;X;X;X;X;X;X;X;X;X;X;X	XXXXXXXXPPPPPPPPPPXXXXXXXXXXXXX	VLVSTDLC(1)GR	VLVSTDLC(64.82)GR	8	2	-0.48035	By MS/MS	By matching	By MS/MS	By matching
C4LSK4	80	C4LSK4	C4LSK4	>tr|C4LSK4|C4LSK4_ENTHI RING finger protein, putative OS=Entamoeba histolytica OX=5759 GN=EHI_151630 PE=4 SV=1	1	77.1919	4.83986e-06	95.264	79.72	77.192									1	95.2645	4.83986e-06	95.264	1	43.0829	0.0137749	43.083	1	77.1919	6.70175e-05	77.192	1	78.7702	0.0014266	78.77		1	C	FHTHCISSWLRQRAVCPLDLKQWEYARIGK_	X;X;X;X;X;X;X;X;X;X;X;X;X;X;X;Carbamidomethyl (C);X;X;X;X;X;X;X;X;X;X;X;X;X;X;X	XXXXXXXXXXXXXPPPPPPPPPPPPPPXXXX	AVC(1)PLDLKQWEYAR	AVC(77.19)PLDLKQWEYAR	3	3	-0.40295	By matching	By matching	By MS/MS	By MS/MS
C4LSK5	61	C4LSK5	C4LSK5	>tr|C4LSK5|C4LSK5_ENTHI HEAT repeat domain containing protein OS=Entamoeba histolytica OX=5759 GN=EHI_151640 PE=4 SV=1	1	55.5305	0.00151087	77.282	64.246	55.531					1	52.7161	0.00604611	52.716					1	77.2825	0.00151087	77.282					1	55.5305	0.0135328	55.531		1	C	ANSGQSDDIRKSALLCFGRTINKIDDLKSVN	X;X;X;X;X;X;X;X;X;X;X;X;X;X;X;Carbamidomethyl (C);X;X;X;X;X;X;X;X;X;X;X;X;X;X;X	XXXXXXXXXXXPPPPPPPPXXXXXXXXXXXX	SALLC(1)FGR	SALLC(55.53)FGR	5	2	-0.11265	By matching	By MS/MS	By matching	By MS/MS
C4LSK6	3	C4LSK6	C4LSK6	>tr|C4LSK6|C4LSK6_ENTHI Pseudouridine synthase, putative OS=Entamoeba histolytica OX=5759 GN=EHI_151650 PE=3 SV=1	1	38.6693	0.0428844	38.669	35.137	38.669	1	38.6693	0.0428844	38.669																						1	C	_____________MTCNNQQVNLEHDTNLTQ	X;X;X;X;X;X;X;X;X;X;X;X;X;X;X;Carbamidomethyl (C);X;X;X;X;X;X;X;X;X;X;X;X;X;X;X	XXXXXXXXXXXXXXPPPPPPPPPPPPPPPPP	TC(1)NNQQVNLEHDTNLTQPIQLKK	TC(38.67)NNQQVNLEHDTNLTQPIQLKK	2	3	0.51859	By MS/MS	By matching	By matching	By matching
C4LSM1	82	C4LSM1	C4LSM1	>tr|C4LSM1|C4LSM1_ENTHI Ganglioside gm2 activator protein, putative OS=Entamoeba histolytica OX=5759 GN=EHI_151800 PE=4 SV=1	1	92.1898	1.96634e-05	92.19	45.728	92.19	1	92.1898	1.96634e-05	92.19					0	0		NaN					0	0		NaN						1	C	ALTFQKEVLFWVTVPCAKNVGSCTYNNICEL	X;X;X;X;X;X;X;X;X;X;X;X;X;X;X;Carbamidomethyl (C);X;X;X;X;X;X;X;X;X;X;X;X;X;X;X	XXXXXXPPPPPPPPPPPPXXXXXXXXXXXXX	EVLFWVTVPC(1)AK	EVLFWVTVPC(92.19)AK	10	2	0.904	By MS/MS	By matching	By matching	By matching
C4LSM1	167	C4LSM1	C4LSM1	>tr|C4LSM1|C4LSM1_ENTHI Ganglioside gm2 activator protein, putative OS=Entamoeba histolytica OX=5759 GN=EHI_151800 PE=4 SV=1	1	154.457	3.9577e-22	154.46	136.79	154.46	1	137.613	3.53629e-15	137.61					1	145.458	1.24496e-21	145.46					1	154.457	3.9577e-22	154.46						1	C	KIKMVATDPTGAEISCYDAKFSLSTK_____	X;X;X;Oxidation (M);X;X;X;X;X;X;X;X;X;X;X;Carbamidomethyl (C);X;X;X;X;X;X;X;X;X;X;X;X;X;X;X	XXXPPPPPPPPPPPPPPPPPXXXXXXXXXXX	MVATDPTGAEISC(1)YDAK	MVATDPTGAEISC(154.46)YDAK	13	2	-0.70885	By MS/MS	By matching	By MS/MS	By matching
C4LSM1	119	C4LSM1	C4LSM1	>tr|C4LSM1|C4LSM1_ENTHI Ganglioside gm2 activator protein, putative OS=Entamoeba histolytica OX=5759 GN=EHI_151800 PE=4 SV=1	1	57.8855	8.43801e-24	163.18	150.69	57.885	1	28.2828	8.43801e-24	163.18					1	55.5782	0.000223994	60.764					1	57.8855	0.000899981	57.885						2	C	ECLNATRSHGFDKVPCSCPIPVSRYTASIPI	X;X;X;X;X;X;X;X;X;X;X;X;NEM H2O;X;X;Carbamidomethyl (C);X;Carbamidomethyl (C);X;X;X;X;X;X;X;X;X;X;X;X;X	XXXXXXXPPPPPPPPPPPPPPPPPXXXXXXX	VPC(1)SC(1)PIPVSR	VPC(57.89)SC(57.89)PIPVSR	3	2	-1.2957	By MS/MS	By matching	By MS/MS	By matching
C4LSM1	121	C4LSM1	C4LSM1	>tr|C4LSM1|C4LSM1_ENTHI Ganglioside gm2 activator protein, putative OS=Entamoeba histolytica OX=5759 GN=EHI_151800 PE=4 SV=1	1	57.8855	8.43801e-24	163.18	150.69	57.885	1	28.2828	8.43801e-24	163.18					1	55.5782	0.000223994	60.764					1	57.8855	0.000899981	57.885						2	C	LNATRSHGFDKVPCSCPIPVSRYTASIPIPP	X;X;X;X;X;X;X;X;X;X;NEM H2O;X;X;Carbamidomethyl (C);X;Carbamidomethyl (C);X;X;X;X;X;X;X;X;X;X;X;X;X;X;X	XXXXXPPPPPPPPPPPPPPPPPXXXXXXXXX	VPC(1)SC(1)PIPVSR	VPC(57.89)SC(57.89)PIPVSR	5	2	-1.2957	By MS/MS	By matching	By MS/MS	By matching
C4LSM2;C4LVN8	21;23	C4LSM2;C4LVN8	C4LSM2	>tr|C4LSM2|C4LSM2_ENTHI Eukaryotic translation initiation factor 5A OS=Entamoeba histolytica OX=5759 GN=EHI_151810 PE=3 SV=1;>tr|C4LVN8|C4LVN8_ENTHI Eukaryotic translation initiation factor 5A OS=Entamoeba histolytica OX=5759 GN=EHI_186480 PE=3 SV=1	1	151.389	2.54796e-24	168.55	140.87	151.39	1	22.0513	2.54796e-24	168.55	0	0		NaN	1	109.872	3.96049e-07	109.87					1	151.389	5.40961e-22	151.39	1	22.8261	0.0308667	22.826		2	C	NEFEKGNAEHSGVYPCQCSALRKGGYVVIKG	X;X;X;X;X;X;X;X;X;X;X;X;X;X;X;Carbamidomethyl (C);X;Carbamidomethyl (C);X;X;X;X;X;X;X;X;X;X;X;X;X	XXXXXPPPPPPPPPPPPPPPPPXXXXXXXXX	GNAEHSGVYPC(1)QC(1)SALR	GNAEHSGVYPC(151.39)QC(151.39)SALR	11	2	-0.26718	By MS/MS	By matching	By MS/MS	By matching
C4LSM2;C4LVN8	23;25	C4LSM2;C4LVN8	C4LSM2	>tr|C4LSM2|C4LSM2_ENTHI Eukaryotic translation initiation factor 5A OS=Entamoeba histolytica OX=5759 GN=EHI_151810 PE=3 SV=1;>tr|C4LVN8|C4LVN8_ENTHI Eukaryotic translation initiation factor 5A OS=Entamoeba histolytica OX=5759 GN=EHI_186480 PE=3 SV=1	1	151.389	2.54796e-24	168.55	140.87	151.39	1	22.0513	2.54796e-24	168.55	0	0		NaN	1	109.872	3.96049e-07	109.87					1	151.389	5.40961e-22	151.39	1	22.8261	0.0308667	22.826		2	C	FEKGNAEHSGVYPCQCSALRKGGYVVIKGRP	X;X;X;X;X;X;X;X;X;X;X;X;X;Carbamidomethyl (C);X;Carbamidomethyl (C);X;X;X;X;X;X;X;X;X;X;X;X;X;X;X	XXXPPPPPPPPPPPPPPPPPXXXXXXXXXXX	GNAEHSGVYPC(1)QC(1)SALR	GNAEHSGVYPC(151.39)QC(151.39)SALR	13	2	-0.26718	By MS/MS	By matching	By MS/MS	By matching
C4LSM2;C4LVN8	74;76	C4LSM2;C4LVN8	C4LSM2	>tr|C4LSM2|C4LSM2_ENTHI Eukaryotic translation initiation factor 5A OS=Entamoeba histolytica OX=5759 GN=EHI_151810 PE=3 SV=1;>tr|C4LVN8|C4LVN8_ENTHI Eukaryotic translation initiation factor 5A OS=Entamoeba histolytica OX=5759 GN=EHI_186480 PE=3 SV=1	1	49.1878	9.99109e-44	220.42	206.34	49.188	1	85.7374	9.99109e-44	220.42	1	36.4511	0.00901214	36.451	1	35.436	7.30579e-10	117.3	1	26.4119	0.000304671	58.246	1	49.1878	3.50211e-15	132.14	1	55.3373	0.000316368	55.337		1	C	FAGYDIFTGKRLDDSCPSTHNVEVPEVKRTE;YAGYDIFTGKRLDDSCPSTHNVEVPEVKRTE	X;X;X;X;X;X;X;X;X;X;X;X;X;X;X;Carbamidomethyl (C);X;X;X;X;X;X;X;X;X;X;X;NEM H2O;X;X;X	XXXXXXXXXXPPPPPPPPPPPPPPPPPPPXX	RLDDSC(1)PSTHNVEVPEVKR	RLDDSC(49.19)PSTHNVEVPEVKR	6	4	0.60177	By MS/MS	By MS/MS	By MS/MS	By MS/MS
C4LSP0	274	C4LSP0	C4LSP0	>tr|C4LSP0|C4LSP0_ENTHI Elongator complex protein 3 OS=Entamoeba histolytica OX=5759 GN=EHI_152010 PE=3 SV=1	1	64.1212	2.69072e-09	114.24	103.39	64.121	1	114.239	2.69072e-09	114.24					1	64.1212	0.000633387	64.121														2	C	EDICKECNRGHTVQDCIGCYKRLKDAGYKIV	X;X;X;X;X;X;X;X;X;X;X;X;X;X;X;Carbamidomethyl (C);X;X;Carbamidomethyl (C);X;X;X;X;X;X;X;X;X;X;X;X	XXXXXXXXXPPPPPPPPPPPPXXXXXXXXXX	GHTVQDC(1)IGC(1)YK	GHTVQDC(64.12)IGC(64.12)YK	7	2	4.0577	By MS/MS	By matching	By matching	By matching
C4LSP0	277	C4LSP0	C4LSP0	>tr|C4LSP0|C4LSP0_ENTHI Elongator complex protein 3 OS=Entamoeba histolytica OX=5759 GN=EHI_152010 PE=3 SV=1	1	64.1212	2.69072e-09	114.24	103.39	64.121	1	114.239	2.69072e-09	114.24					1	64.1212	0.000633387	64.121														2	C	CKECNRGHTVQDCIGCYKRLKDAGYKIVTHM	X;X;X;X;X;X;X;X;X;X;X;X;Carbamidomethyl (C);X;X;Carbamidomethyl (C);X;X;X;X;X;X;X;X;X;X;X;X;X;X;X	XXXXXXPPPPPPPPPPPPXXXXXXXXXXXXX	GHTVQDC(1)IGC(1)YK	GHTVQDC(64.12)IGC(64.12)YK	10	2	4.0577	By MS/MS	By matching	By matching	By matching
C4LSP0	327	C4LSP0	C4LSP0	>tr|C4LSP0|C4LSP0_ENTHI Elongator complex protein 3 OS=Entamoeba histolytica OX=5759 GN=EHI_152010 PE=3 SV=1	1	34.0887	0.0306948	34.089	14.729	34.089	1	34.0887	0.0306948	34.089																						1	C	FSDGAYQCDGLKLYPCLVIRGTRLYEMWRKG	X;X;X;X;X;X;X;X;X;X;X;X;X;X;X;Carbamidomethyl (C);X;X;X;X;X;X;X;X;X;X;X;X;X;X;X	XXXXXXXXXXXXPPPPPPPPXXXXXXXXXXX	LYPC(1)LVIR	LYPC(34.09)LVIR	4	2	0.20959	By MS/MS	By matching	By matching	By matching
C4LSQ1	55	C4LSQ1	C4LSQ1	>tr|C4LSQ1|C4LSQ1_ENTHI Uncharacterized protein OS=Entamoeba histolytica OX=5759 GN=EHI_152130 PE=4 SV=1	1	43.0002	0.0154964	43	9.1472	43	0	0		NaN	1	32.4704	0.0334092	32.47					1	43.0002	0.0154964	43					0	0		NaN		1	C	VLKEIEDFQPDRIINCAGKTGRPNVDWCEDH	X;X;X;X;X;X;X;X;X;X;X;X;X;X;X;Carbamidomethyl (C);X;X;X;X;X;X;X;X;X;X;X;X;X;X;X	XXXXXXXXXXXXPPPPPPPXXXXXXXXXXXX	IINC(1)AGK	IINC(43)AGK	4	2	1.0468	By matching	By MS/MS	By matching	By MS/MS
C4LSQ2	280	C4LSQ2	C4LSQ2	>tr|C4LSQ2|C4LSQ2_ENTHI Uncharacterized protein OS=Entamoeba histolytica OX=5759 GN=EHI_152140 PE=4 SV=1	1	36.8416	0.0236426	36.842	18.402	36.842					0	0		NaN									1	36.8416	0.0236426	36.842	1	24.8188	0.0544421	24.819		1	C	VWGFDQNIREIFKKLCFIASQKKNGVGILME	X;X;X;X;X;X;X;X;X;X;X;X;X;X;X;Carbamidomethyl (C);X;X;X;X;X;X;X;X;X;X;X;X;X;X;X	XXXXXXXXXXXXXXPPPPPPPPXXXXXXXXX	LC(1)FIASQK	LC(36.84)FIASQK	2	2	0.70205	By matching	By matching	By matching	By matching
C4LSQ9	424	C4LSQ9	C4LSQ9	>tr|C4LSQ9|C4LSQ9_ENTHI Uncharacterized protein OS=Entamoeba histolytica OX=5759 GN=EHI_152210 PE=4 SV=1	1	32.9988	0.0274638	32.999	8.1231	32.999	1	32.9988	0.0274638	32.999																						1	C	IKYLDSFPPQRKPVHCDFEEKDIKEFVQTFK	X;X;X;X;X;X;X;X;X;X;X;X;X;X;X;Carbamidomethyl (C);X;X;X;X;X;X;X;X;X;X;X;X;X;X;X	XXXXXXXXXXXXPPPPPPPPPXXXXXXXXXX	PVHC(1)DFEEK	PVHC(33)DFEEK	4	2	-0.66221	By MS/MS	By matching	By matching	By matching
C4LSR0;B1N3E9	311;13	C4LSR0	C4LSR0	>tr|C4LSR0|C4LSR0_ENTHI Uncharacterized protein OS=Entamoeba histolytica OX=5759 GN=EHI_152220 PE=4 SV=1;>tr|B1N3E9|B1N3E9_ENTHI Uncharacterized protein OS=Entamoeba histolytica OX=5759 GN=EHI_150100 PE=4 SV=1	1	81.9699	1.76089e-08	81.97	73.622	81.97	1	81.9699	1.76089e-08	81.97																						3	C	KYFMNQLTAEEERKVCPNAQDPMNWYVCDDA	X;X;X;Oxidation (M);X;X;X;X;X;X;X;X;X;X;X;Carbamidomethyl (C);X;X;X;X;X;X;X;X;X;X;X;Carbamidomethyl (C);X;X;X	XXXXXXXXXXXXXPPPPPPPPPPPPPPPPPP	KVC(1)PNAQDPMNWYVC(1)DDAC(1)VTNEELHK	KVC(81.97)PNAQDPMNWYVC(81.97)DDAC(81.97)VTNEELHK	3	3	-0.045908	By MS/MS	By matching	By matching	By matching
C4LSR0;B1N3E9	323;25	C4LSR0	C4LSR0	>tr|C4LSR0|C4LSR0_ENTHI Uncharacterized protein OS=Entamoeba histolytica OX=5759 GN=EHI_152220 PE=4 SV=1;>tr|B1N3E9|B1N3E9_ENTHI Uncharacterized protein OS=Entamoeba histolytica OX=5759 GN=EHI_150100 PE=4 SV=1	1	81.9699	1.76089e-08	81.97	73.622	81.97	1	81.9699	1.76089e-08	81.97																						3	C	RKVCPNAQDPMNWYVCDDACVTNEELHKTIV	X;X;X;Carbamidomethyl (C);X;X;X;X;X;X;X;X;X;X;X;Carbamidomethyl (C);X;X;X;Carbamidomethyl (C);X;X;X;X;X;X;X;X;X;X;X	XPPPPPPPPPPPPPPPPPPPPPPPPPPPXXX	KVC(1)PNAQDPMNWYVC(1)DDAC(1)VTNEELHK	KVC(81.97)PNAQDPMNWYVC(81.97)DDAC(81.97)VTNEELHK	15	3	-0.045908	By MS/MS	By matching	By matching	By matching
C4LSR0;B1N3E9	327;29	C4LSR0	C4LSR0	>tr|C4LSR0|C4LSR0_ENTHI Uncharacterized protein OS=Entamoeba histolytica OX=5759 GN=EHI_152220 PE=4 SV=1;>tr|B1N3E9|B1N3E9_ENTHI Uncharacterized protein OS=Entamoeba histolytica OX=5759 GN=EHI_150100 PE=4 SV=1	1	81.9699	1.76089e-08	81.97	73.622	81.97	1	81.9699	1.76089e-08	81.97																						3	C	PNAQDPMNWYVCDDACVTNEELHKTIVNELY	X;X;X;X;X;X;X;X;X;X;X;Carbamidomethyl (C);X;X;X;Carbamidomethyl (C);X;X;X;X;X;X;X;X;X;X;X;X;X;X;X	PPPPPPPPPPPPPPPPPPPPPPPPXXXXXXX	KVC(1)PNAQDPMNWYVC(1)DDAC(1)VTNEELHK	KVC(81.97)PNAQDPMNWYVC(81.97)DDAC(81.97)VTNEELHK	19	3	-0.045908	By MS/MS	By matching	By matching	By matching
C4LSR0	82	C4LSR0	C4LSR0	>tr|C4LSR0|C4LSR0_ENTHI Uncharacterized protein OS=Entamoeba histolytica OX=5759 GN=EHI_152220 PE=4 SV=1	1	99.7468	5.83072e-07	99.747	75.16	99.747	1	94.4871	1.04554e-05	94.487					1	99.7468	5.83072e-07	99.747														1	C	VRLNVQSFGILMVDACKKYPSVCNTPGDDVI	X;X;X;X;X;X;X;X;X;X;X;X;X;X;X;Carbamidomethyl (C);X;X;X;X;X;X;X;X;X;X;X;X;X;X;X	XXPPPPPPPPPPPPPPPXXXXXXXXXXXXXX	LNVQSFGILMVDAC(1)K	LNVQSFGILMVDAC(99.75)K	14	2	-2.2641	By MS/MS	By matching	By MS/MS	By matching
C4LSR0;B1N3E9	349;51	C4LSR0	C4LSR0	>tr|C4LSR0|C4LSR0_ENTHI Uncharacterized protein OS=Entamoeba histolytica OX=5759 GN=EHI_152220 PE=4 SV=1;>tr|B1N3E9|B1N3E9_ENTHI Uncharacterized protein OS=Entamoeba histolytica OX=5759 GN=EHI_150100 PE=4 SV=1	1	74.5162	4.1346e-22	131.13	119.85	74.516	1	131.129	4.1346e-22	131.13					1	102.026	9.58253e-14	102.03					1	74.5162	7.51607e-08	75.404						2	C	HKTIVNELYQAYKLQCVNPEEHFCETGYDYY	X;X;X;X;X;X;X;X;X;X;X;X;X;X;X;Carbamidomethyl (C);X;X;X;X;X;X;X;Carbamidomethyl (C);X;X;X;X;X;X;X	XXXXXXXXXXXXXPPPPPPPPPPPPPPPPPP	LQC(1)VNPEEHFC(1)ETGYDYYLTELKADSK	LQC(74.52)VNPEEHFC(74.52)ETGYDYYLTELKADSK	3	3	1.5762	By MS/MS	By matching	By MS/MS	By matching
C4LSR0;B1N3E9	357;59	C4LSR0	C4LSR0	>tr|C4LSR0|C4LSR0_ENTHI Uncharacterized protein OS=Entamoeba histolytica OX=5759 GN=EHI_152220 PE=4 SV=1;>tr|B1N3E9|B1N3E9_ENTHI Uncharacterized protein OS=Entamoeba histolytica OX=5759 GN=EHI_150100 PE=4 SV=1	1	74.5162	4.1346e-22	131.13	119.85	74.516	1	131.129	4.1346e-22	131.13					1	102.026	9.58253e-14	102.03					1	74.5162	7.51607e-08	75.404						2	C	YQAYKLQCVNPEEHFCETGYDYYLTELKADS	X;X;X;X;X;X;X;Carbamidomethyl (C);X;X;X;X;X;X;X;Carbamidomethyl (C);X;X;X;X;X;X;X;X;X;X;X;X;X;X;X	XXXXXPPPPPPPPPPPPPPPPPPPPPPPPPP	LQC(1)VNPEEHFC(1)ETGYDYYLTELKADSK	LQC(74.52)VNPEEHFC(74.52)ETGYDYYLTELKADSK	11	3	1.5762	By MS/MS	By matching	By MS/MS	By matching
C4LSR0	191	C4LSR0	C4LSR0	>tr|C4LSR0|C4LSR0_ENTHI Uncharacterized protein OS=Entamoeba histolytica OX=5759 GN=EHI_152220 PE=4 SV=1	1	64.82	0.00071239	64.82	54.815	64.82	1	64.82	0.00071239	64.82					0	0		NaN					0	0		NaN						1	C	IGFGALIHDAKYYLPCTEEYKNFCDESVYNV	X;X;X;X;X;X;X;X;X;X;X;X;X;X;X;Carbamidomethyl (C);X;X;X;X;X;X;X;X;X;X;X;X;X;X;X	XXXXXXXXXXXPPPPPPPPPPXXXXXXXXXX	YYLPC(1)TEEYK	YYLPC(64.82)TEEYK	5	2	1.8809	By MS/MS	By matching	By matching	By matching
C4LSR6	826	C4LSR6	C4LSR6	>tr|C4LSR6|C4LSR6_ENTHI Serine palmitoyltransferase, putative OS=Entamoeba histolytica OX=5759 GN=EHI_152280 PE=3 SV=1	1	52.5564	3.97208e-22	125.16	115.96	52.556	1	118.681	3.97208e-22	118.68					1	89.0239	3.25121e-14	105.35	1	31.4099	0.00550005	31.41	1	52.5564	1.243e-18	125.16	1	58.2717	6.10281e-06	58.272		1	C	IQIIGNDSTPYVLLNCEGKNEEIVKDLREKG	X;X;X;X;X;X;X;X;X;X;X;X;X;X;X;Carbamidomethyl (C);X;X;X;X;X;X;X;X;X;X;X;X;X;X;X	PPPPPPPPPPPPPPPPPPPPPPPPPPPPXXX	AQNIQIIGNDSTPYVLLNC(1)EGKNEEIVKDLR	AQNIQIIGNDSTPYVLLNC(52.56)EGKNEEIVKDLR	19	4	-1.7259	By MS/MS	By matching	By MS/MS	By MS/MS
C4LSR6	142	C4LSR6	C4LSR6	>tr|C4LSR6|C4LSR6_ENTHI Serine palmitoyltransferase, putative OS=Entamoeba histolytica OX=5759 GN=EHI_152280 PE=3 SV=1	1	62.6585	0.0056424	62.659	16.643	62.659					1	33.6425	0.0371267	33.642	0	0		NaN	1	30.5036	0.0451024	30.504	1	62.6585	0.0056424	62.659	1	28.2181	0.0509099	28.218		1	C	GFGGRHPIVTKEVADCLKNKGSSCNGFAAER	X;X;X;X;X;X;X;X;X;X;X;X;X;X;X;Carbamidomethyl (C);X;X;X;X;X;X;X;Carbamidomethyl (C);X;X;X;X;X;X;X	XXXXXXXXXXXPPPPPPPXXXXXXXXXXXXX	EVADC(1)LK	EVADC(62.66)LK	5	2	0.091834	By matching	By MS/MS	By matching	By MS/MS
C4LSR6	453	C4LSR6	C4LSR6	>tr|C4LSR6|C4LSR6_ENTHI Serine palmitoyltransferase, putative OS=Entamoeba histolytica OX=5759 GN=EHI_152280 PE=3 SV=1	1	36.1815	2.66845e-05	83.087	70.291	36.181	1	45.8732	0.00266487	45.873	1	31.9138	0.0182576	31.914	1	83.087	2.66845e-05	83.087	1	30.4839	0.000109774	71.513	1	36.1815	0.0104181	36.181	1	40.2776	0.00188968	49.188		1	C	VGAPACPITACRVRFCISAAHTDEDIEKAFK	X;X;X;X;X;Carbamidomethyl (C);NEM H2O;X;X;X;X;Carbamidomethyl (C);NEM;NEM H2O;X;X;X;X;Carbamidomethyl (C);X;X;X;X;X;X;X;X;X;X;X;X;X;X;X	XXXXXXXXXXXXXXPPPPPPPPPPPPPPXXX	FC(1)ISAAHTDEDIEK	FC(36.18)ISAAHTDEDIEK	2	3	-0.068654	By MS/MS	By MS/MS	By MS/MS	By MS/MS
C4LSR6	443	C4LSR6	C4LSR6	>tr|C4LSR6|C4LSR6_ENTHI Serine palmitoyltransferase, putative OS=Entamoeba histolytica OX=5759 GN=EHI_152280 PE=3 SV=1	1	91.9321	2.18047e-07	110.12	98.414	91.932	1	58.9802	2.18047e-07	110.12	0	0		NaN	1	95.1972	8.3137e-06	95.197	1	87.3878	2.33489e-05	87.388	1	91.9321	1.45999e-05	91.932	1	22.0513	4.76699e-05	72.433		1;2	C	YLKRGIAVVGVGAPACPITACRVRFCISAAH	X;X;X;X;X;X;X;X;X;X;X;X;X;X;X;Carbamidomethyl (C);X;X;X;X;Carbamidomethyl (C);NEM;NEM H2O;X;X;X;X;Carbamidomethyl (C);NEM;NEM H2O;X;X;X;X;X	XXXXPPPPPPPPPPPPPPPPPPXXXXXXXXX	GIAVVGVGAPAC(1)PITAC(1)R	GIAVVGVGAPAC(91.93)PITAC(91.93)R	12	2	-0.71749	By MS/MS	By matching	By MS/MS	By MS/MS
C4LSR6	448	C4LSR6	C4LSR6	>tr|C4LSR6|C4LSR6_ENTHI Serine palmitoyltransferase, putative OS=Entamoeba histolytica OX=5759 GN=EHI_152280 PE=3 SV=1	1	91.9321	2.18047e-07	110.12	98.414	91.932	1	58.9802	2.18047e-07	110.12	0	0		NaN	1	95.1972	8.3137e-06	95.197	1	87.3878	2.33489e-05	87.388	1	91.9321	1.45999e-05	91.932	1	22.0513	4.76699e-05	72.433		1;2	C	IAVVGVGAPACPITACRVRFCISAAHTDEDI	X;X;X;X;X;X;X;X;X;X;Carbamidomethyl (C);NEM H2O;X;X;X;X;Carbamidomethyl (C);X;X;X;X;Carbamidomethyl (C);NEM;NEM H2O;X;X;X;X;X;X;X;X;X;X	PPPPPPPPPPPPPPPPPXXXXXXXXXXXXXX	GIAVVGVGAPAC(1)PITAC(1)R	GIAVVGVGAPAC(91.93)PITAC(91.93)R	17	2	-0.71749	By MS/MS	By matching	By MS/MS	By MS/MS
C4LSR6	150	C4LSR6	C4LSR6	>tr|C4LSR6|C4LSR6_ENTHI Serine palmitoyltransferase, putative OS=Entamoeba histolytica OX=5759 GN=EHI_152280 PE=3 SV=1	1	35.0369	0.000145125	80.507	64.878	35.037	1	80.5075	0.000145125	80.507	1	33.5889	0.022265	33.589	1	35.0369	0.00788395	39.73	1	23.0918	0.0471775	23.092	1	33.1918	0.0232108	33.192	1	39.7304	0.00788395	39.73		1	C	VTKEVADCLKNKGSSCNGFAAERGISEEQKK	X;X;X;X;X;X;X;Carbamidomethyl (C);NEM;X;X;X;X;X;X;X;Carbamidomethyl (C);X;X;X;X;X;X;X;X;X;X;X;X;X;X;X	XXXXXXXXXXPPPPPPPPPPPPPXXXXXXXX	NKGSSC(1)NGFAAER	NKGSSC(35.04)NGFAAER	6	2	0.61138	By MS/MS	By MS/MS	By MS/MS	By MS/MS
C4LSR6	863	C4LSR6	C4LSR6	>tr|C4LSR6|C4LSR6_ENTHI Serine palmitoyltransferase, putative OS=Entamoeba histolytica OX=5759 GN=EHI_152280 PE=3 SV=1	1	80.0144	5.87494e-06	100.04	54.036	80.014	1	100.037	5.87494e-06	100.04													1	80.0144	0.000395691	80.014						1	C	QHLDEDWCQNKYIRLCIGKDFTQDKMIEFIN	X;X;X;X;X;X;X;X;X;X;X;X;X;X;X;Carbamidomethyl (C);X;X;X;X;X;X;X;X;X;Oxidation (M);X;X;X;X;X	XXXXXXXXXXXXXXPPPPPPPPPPPXXXXXX	LC(1)IGKDFTQDK	LC(80.01)IGKDFTQDK	2	2	-2.837	By MS/MS	By matching	By matching	By matching
C4LSS1	242	C4LSS1	C4LSS1	>tr|C4LSS1|C4LSS1_ENTHI Choline/ethanolamine kinase, putative OS=Entamoeba histolytica OX=5759 GN=EHI_152340 PE=4 SV=1	1	30.4182	0.0192068	30.418	13.645	30.418									1	30.4182	0.0192068	30.418														1	C	IFLENILKNKSDVVLCHNDLLLKNFIKGEDN	X;X;X;X;X;X;X;X;X;X;X;X;X;X;X;Carbamidomethyl (C);X;X;X;X;X;X;X;X;X;X;X;X;X;X;X	XXXXXXXXPPPPPPPPPPPPPPPXXXXXXXX	NKSDVVLC(1)HNDLLLK	NKSDVVLC(30.42)HNDLLLK	8	3	2.2725	By matching	By matching	By MS/MS	By matching
C4LSU6	76	C4LSU6	C4LSU6	>tr|C4LSU6|C4LSU6_ENTHI Thioredoxin, putative OS=Entamoeba histolytica OX=5759 GN=EHI_152600 PE=4 SV=1	1	86.0142	0.000472296	86.014	55.45	86.014	1	86.0142	0.000472296	86.014																						1	C	QLSEELPNVKFHQINCVTYKQFCQSHRVNSY	X;X;X;X;X;X;X;X;X;X;X;X;X;X;X;Carbamidomethyl (C);X;X;X;X;X;X;X;X;X;X;X;X;X;X;X	XXXXXXXXXXPPPPPPPPPPXXXXXXXXXXX	FHQINC(1)VTYK	FHQINC(86.01)VTYK	6	2	1.2422	By MS/MS	By matching	By matching	By matching
C4LSV0	70	C4LSV0	C4LSV0	>tr|C4LSV0|C4LSV0_ENTHI Actin-related protein 2/3 complex subunit 4 OS=Entamoeba histolytica OX=5759 GN=EHI_030820 PE=3 SV=1	1	54.2918	6.77199e-05	71.519	57.773	54.292	0	0		NaN	0	0		NaN	1	71.5186	6.77199e-05	71.519	1	22.6297	0.0334274	22.63	1	54.2918	0.00040899	54.292	1	47.9041	0.00169459	47.904		1	C	RVPSEPSGEENGVDKCEKVMIEGSINSVRIS	X;X;X;X;X;X;X;X;X;X;X;X;X;X;X;Carbamidomethyl (C);X;X;X;X;X;X;X;X;X;X;X;X;X;X;X	XPPPPPPPPPPPPPPPPPXXXXXXXXXXXXX	VPSEPSGEENGVDKC(1)EK	VPSEPSGEENGVDKC(54.29)EK	15	3	-3.4709	By matching	By matching	By MS/MS	By MS/MS
C4M1F7;C4LSV3	517;517	C4M1F7	C4M1F7	>tr|C4M1F7|C4M1F7_ENTHI Rap/Ran GTPase-activating protein, putative OS=Entamoeba histolytica OX=5759 GN=EHI_030900 PE=4 SV=1;>tr|C4LSV3|C4LSV3_ENTHI Rap/Ran GTPase-activating protein, putative OS=Entamoeba histolytica OX=5759 GN=EHI_152690 PE=4 SV=1	1	35.2953	0.032927	35.295	20.52	35.295	0	0		NaN	0	0		NaN	0	0		NaN	1	28.174	0.051022	28.174	0	0		NaN	1	35.2953	0.032927	35.295		1	C	WFMIQDTCMETAVKNCITSVRKVCELLIRYD	X;X;X;X;X;X;X;X;X;X;X;X;X;X;X;Carbamidomethyl (C);X;X;X;X;X;X;X;X;X;X;X;X;X;X;X	XXXXXXXXXXXXXXPPPPPPPXXXXXXXXXX	NC(1)ITSVR	NC(35.3)ITSVR	2	2	2.931	By matching	By matching	By matching	By MS/MS
C4LSW8	62	C4LSW8	C4LSW8	>tr|C4LSW8|C4LSW8_ENTHI Uncharacterized protein OS=Entamoeba histolytica OX=5759 GN=EHI_152850 PE=4 SV=1	1	31.9507	0.0178038	31.951	27.251	31.951	1	31.9507	0.0178038	31.951					0	0		NaN															C	HGDRNSIFANVNQTKCNEGECVIGELTDIGK	X;X;X;X;X;X;X;X;X;X;X;X;X;X;X;Carbamidomethyl (C);X;X;X;X;Carbamidomethyl (C);X;X;X;X;X;X;X;X;X;X	XXXXXXXXXXXXXXXPPPPPPPPPPPPPPPP	C(1)NEGEC(1)VIGELTDIGKK	C(31.95)NEGEC(31.95)VIGELTDIGKK	1	3	-0.7831	By matching	By matching	By matching	By matching
C4LSW8	67	C4LSW8	C4LSW8	>tr|C4LSW8|C4LSW8_ENTHI Uncharacterized protein OS=Entamoeba histolytica OX=5759 GN=EHI_152850 PE=4 SV=1	1	31.9507	0.0178038	31.951	27.251	31.951	1	31.9507	0.0178038	31.951					0	0		NaN															C	SIFANVNQTKCNEGECVIGELTDIGKKQMNN	X;X;X;X;X;X;X;X;X;X;Carbamidomethyl (C);X;X;X;X;Carbamidomethyl (C);X;X;X;X;X;X;X;X;X;X;X;X;X;X;X	XXXXXXXXXXPPPPPPPPPPPPPPPPPXXXX	C(1)NEGEC(1)VIGELTDIGKK	C(31.95)NEGEC(31.95)VIGELTDIGKK	6	3	-0.7831	By matching	By matching	By matching	By matching
C4LSX5	192	C4LSX5	C4LSX5	>tr|C4LSX5|C4LSX5_ENTHI Uncharacterized protein OS=Entamoeba histolytica OX=5759 GN=EHI_148050 PE=2 SV=1	1	66.2987	0.0002452	83.358	62.803	66.299	1	83.3579	0.0002452	83.358													1	66.2987	0.00536829	66.299	1	34.2061	0.0244521	34.206		1	C	AAIEKAKEADSNYRACVQLTNDRIHDYYNSQ	X;X;X;X;X;X;X;X;X;X;X;X;X;X;X;Carbamidomethyl (C);X;X;X;X;X;X;X;X;X;X;X;X;X;X;X	XXXXXXXXXXXXXXPPPPPPPPPXXXXXXXX	AC(1)VQLTNDR	AC(66.3)VQLTNDR	2	2	0.25181	By MS/MS	By matching	By matching	By matching
C4LSX5	59	C4LSX5	C4LSX5	>tr|C4LSX5|C4LSX5_ENTHI Uncharacterized protein OS=Entamoeba histolytica OX=5759 GN=EHI_148050 PE=2 SV=1	1	88.075	1.14539e-10	145.29	118.14	88.075	1	145.294	1.14539e-10	145.29					1	82.5155	3.07158e-05	82.515					1	88.075	1.04489e-05	88.075	1	42.3169	0.00470328	42.317		1	C	KSMLRMVQEFRQKRICGQTTLYYGTVKDALE	X;X;X;X;X;X;X;X;X;X;X;X;X;X;X;Carbamidomethyl (C);X;X;X;X;X;X;X;X;X;X;X;X;X;X;X	XXXXXXXXXXXXXXPPPPPPPPPPPPPXXXX	IC(1)GQTTLYYGTVK	IC(88.08)GQTTLYYGTVK	2	2	0.33924	By MS/MS	By matching	By MS/MS	By matching
C4LSY3;B1N2K7	529;436	C4LSY3	C4LSY3	>tr|C4LSY3|C4LSY3_ENTHI Beta-hexosaminidase OS=Entamoeba histolytica OX=5759 GN=EHI_148130 PE=3 SV=1;>tr|B1N2K7|B1N2K7_ENTHI Beta-N-acetylhexosaminidase OS=Entamoeba histolytica OX=5759 GN=EHI_110500 PE=3 SV=1	1	33.7513	0.0148822	33.751	20.166	33.751	1	33.7513	0.0148822	33.751	0	0		NaN					0	0		NaN					0	0		NaN		1	C	RRDIMKGTGPLYHSFCQLPKKEKSN______	X;X;X;X;X;X;X;X;X;X;X;X;X;X;X;Carbamidomethyl (C);X;X;X;X;X;X;X;X;X;X;X;X;X;X;X	XXXXXXPPPPPPPPPPPPPPXXXXXXXXXXX	GTGPLYHSFC(1)QLPK	GTGPLYHSFC(33.75)QLPK	10	3	3.3471	By MS/MS	By matching	By matching	By matching
C4LSY6	581	C4LSY6	C4LSY6	>tr|C4LSY6|C4LSY6_ENTHI Cullin, putative OS=Entamoeba histolytica OX=5759 GN=EHI_148160 PE=3 SV=1	1	34.2307	0.037358	34.231	9.5989	34.231	1	34.2307	0.037358	34.231					0	0		NaN															C	LMLQIKSLMGKEKLICVQSPDGKIKKPEEIK	X;X;X;X;X;X;X;X;X;X;X;X;X;X;X;Carbamidomethyl (C);X;X;X;X;X;X;X;X;X;X;X;X;X;X;X	XXXXXXXXXXXXXPPPPPPPPPPXXXXXXXX	LIC(1)VQSPDGK	LIC(34.23)VQSPDGK	3	2	0.60155	By matching	By matching	By matching	By matching
C4LSY9	111	C4LSY9	C4LSY9	>tr|C4LSY9|C4LSY9_ENTHI GTP-binding nuclear protein OS=Entamoeba histolytica OX=5759 GN=EHI_148190 PE=2 SV=1	1	65.2948	0.000177223	69.03	65.168	65.295	0	0		NaN	1	60.1571	0.000657598	60.157	1	58.0983	0.000769055	58.098	1	37.6134	0.0100617	37.613	1	65.2948	0.000379447	65.295	1	69.0301	0.000177223	69.03		1	C	TYKNVATWYKDLVRVCENIPIVLVGNKCDVK	X;X;X;X;X;X;X;X;X;X;X;X;X;X;X;Carbamidomethyl (C);X;X;X;X;X;X;X;X;X;X;X;X;X;X;X	XXXXXXXXXXXXXXPPPPPPPPPPPPPXXXX	VC(1)ENIPIVLVGNK	VC(65.29)ENIPIVLVGNK	2	2	0.93284	By matching	By MS/MS	By MS/MS	By MS/MS
C4LSZ3	39	C4LSZ3	C4LSZ3	>tr|C4LSZ3|C4LSZ3_ENTHI 60S ribosomal protein L37a, putative OS=Entamoeba histolytica OX=5759 GN=EHI_148230 PE=3 SV=1	1	67.032	0.000938068	79.116	51.862	67.032	1	67.032	0.00158424	67.032	1	51.3355	0.00476951	51.335	1	67.032	0.00158424	67.032	1	55.6761	0.0029473	55.676	1	67.032	0.00158424	67.032	1	79.116	0.000938068	79.116		3	C	KVIKKIEIAQHSKYICPFCCKEAVRRTACGI	X;X;X;X;X;X;X;X;X;X;Propionamide_aa;X;X;X;X;Carbamidomethyl (C);X;X;Carbamidomethyl (C);Carbamidomethyl (C);X;X;X;X;X;X;X;X;Carbamidomethyl (C);X;X	XXXXXXXXXXXXXPPPPPPPPXXXXXXXXXX	YIC(1)PFC(1)C(1)K	YIC(67.03)PFC(67.03)C(67.03)K	3	2	0.29879	By MS/MS	By MS/MS	By MS/MS	By MS/MS
C4LSZ3	42	C4LSZ3	C4LSZ3	>tr|C4LSZ3|C4LSZ3_ENTHI 60S ribosomal protein L37a, putative OS=Entamoeba histolytica OX=5759 GN=EHI_148230 PE=3 SV=1	1	67.032	0.000938068	79.116	51.862	67.032	1	67.032	0.00158424	67.032	1	51.3355	0.00476951	51.335	1	67.032	0.00158424	67.032	1	55.6761	0.0029473	55.676	1	67.032	0.00158424	67.032	1	79.116	0.000938068	79.116		3	C	KKIEIAQHSKYICPFCCKEAVRRTACGIWEC	X;X;X;X;X;X;X;Propionamide_aa;X;X;X;X;Carbamidomethyl (C);X;X;Carbamidomethyl (C);Carbamidomethyl (C);X;X;X;X;X;X;X;X;Carbamidomethyl (C);X;X;X;X;NEM	XXXXXXXXXXPPPPPPPPXXXXXXXXXXXXX	YIC(1)PFC(1)C(1)K	YIC(67.03)PFC(67.03)C(67.03)K	6	2	0.29879	By MS/MS	By MS/MS	By MS/MS	By MS/MS
C4LSZ3	43	C4LSZ3	C4LSZ3	>tr|C4LSZ3|C4LSZ3_ENTHI 60S ribosomal protein L37a, putative OS=Entamoeba histolytica OX=5759 GN=EHI_148230 PE=3 SV=1	1	67.032	0.000938068	79.116	51.862	67.032	1	67.032	0.00158424	67.032	1	51.3355	0.00476951	51.335	1	67.032	0.00158424	67.032	1	55.6761	0.0029473	55.676	1	67.032	0.00158424	67.032	1	79.116	0.000938068	79.116		3	C	KIEIAQHSKYICPFCCKEAVRRTACGIWECK	X;X;X;X;X;X;Propionamide_aa;X;X;X;X;Carbamidomethyl (C);X;X;Carbamidomethyl (C);Carbamidomethyl (C);X;X;X;X;X;X;X;X;Carbamidomethyl (C);X;X;X;X;NEM;X	XXXXXXXXXPPPPPPPPXXXXXXXXXXXXXX	YIC(1)PFC(1)C(1)K	YIC(67.03)PFC(67.03)C(67.03)K	7	2	0.29879	By MS/MS	By MS/MS	By MS/MS	By MS/MS
C4LSZ7	42	C4LSZ7	C4LSZ7	>tr|C4LSZ7|C4LSZ7_ENTHI Obg-like ATPase 1 OS=Entamoeba histolytica OX=5759 GN=EHI_148270 PE=3 SV=1	1	156.13	8.20752e-25	158.98	144.46	156.13	1	52.1849	2.1768e-22	152.89					1	158.976	8.20752e-25	158.98					1	156.13	9.35158e-23	156.13						2	C	LPNVGKSTLFNALTKCQVQAQNYPFCTIDPN	X;X;X;X;X;X;X;X;X;X;X;X;X;X;X;Carbamidomethyl (C);X;X;X;X;X;X;X;X;X;Carbamidomethyl (C);X;X;X;X;X	XXXXXXXXXXXXXXXPPPPPPPPPPPPPPPP	C(1)QVQAQNYPFC(1)TIDPNQAR	C(156.13)QVQAQNYPFC(156.13)TIDPNQAR	1	2	-1.2734	By MS/MS	By matching	By MS/MS	By matching
C4LSZ7	52	C4LSZ7	C4LSZ7	>tr|C4LSZ7|C4LSZ7_ENTHI Obg-like ATPase 1 OS=Entamoeba histolytica OX=5759 GN=EHI_148270 PE=3 SV=1	1	156.13	8.20752e-25	158.98	144.46	156.13	1	52.1849	2.1768e-22	152.89					1	158.976	8.20752e-25	158.98					1	156.13	9.35158e-23	156.13						2	C	NALTKCQVQAQNYPFCTIDPNQARVAVPDER	X;X;X;X;X;Carbamidomethyl (C);X;X;X;X;X;X;X;X;X;Carbamidomethyl (C);X;X;X;X;X;X;X;X;X;X;X;X;X;X;X	XXXXXPPPPPPPPPPPPPPPPPPPXXXXXXX	C(1)QVQAQNYPFC(1)TIDPNQAR	C(156.13)QVQAQNYPFC(156.13)TIDPNQAR	11	2	-1.2734	By MS/MS	By matching	By MS/MS	By matching
C4LSZ7	182	C4LSZ7	C4LSZ7	>tr|C4LSZ7|C4LSZ7_ENTHI Obg-like ATPase 1 OS=Entamoeba histolytica OX=5759 GN=EHI_148270 PE=3 SV=1	1	73.8341	0.000204741	78.401	52.419	73.834	1	54.0901	0.001361	54.09					1	78.4013	0.000204741	78.401					1	73.8341	0.000334013	73.834						1	C	QNVHKKDKVVIEEIACLNKCLDMVKQKRPIR	X;X;X;X;X;X;X;X;X;X;X;X;X;X;X;Carbamidomethyl (C);X;X;X;X;X;X;X;X;X;X;X;X;X;X;X	XXXXXXPPPPPPPPPPPPPXXXXXXXXXXXX	DKVVIEEIAC(1)LNK	DKVVIEEIAC(73.83)LNK	10	2	1.2063	By MS/MS	By matching	By MS/MS	By matching
C4LSZ7	378	C4LSZ7	C4LSZ7	>tr|C4LSZ7|C4LSZ7_ENTHI Obg-like ATPase 1 OS=Entamoeba histolytica OX=5759 GN=EHI_148270 PE=3 SV=1	1	79.0886	0.000214664	79.089	69.577	79.089	1	34.101	0.0278856	34.101					0	0		NaN					1	79.0886	0.000214664	79.089							C	KLQGKYRQEGRNYQVCDGDIMFFRANTSGLG	X;X;X;X;X;X;X;X;X;X;X;X;X;X;X;Carbamidomethyl (C);X;X;X;X;X;X;X;X;X;X;X;X;X;X;X	XXXXXXXXXXXPPPPPPPPPPPPPXXXXXXX	NYQVC(1)DGDIMFFR	NYQVC(79.09)DGDIMFFR	5	2	1.5875	By matching	By matching	By matching	By matching
C4LSZ7	72	C4LSZ7	C4LSZ7	>tr|C4LSZ7|C4LSZ7_ENTHI Obg-like ATPase 1 OS=Entamoeba histolytica OX=5759 GN=EHI_148270 PE=3 SV=1	1	70.5552	3.02549e-05	70.555	61.763	70.555	1	63.4884	0.000132955	63.488					1	61.9415	0.00016902	61.942					1	70.5552	3.02549e-05	70.555						1	C	NQARVAVPDERFDYLCEHYKPASKVAASLQV	X;X;X;X;X;X;X;X;X;X;X;X;X;X;X;Carbamidomethyl (C);X;X;X;X;X;X;X;X;X;X;X;X;X;X;X	XXXXPPPPPPPPPPPPPPPPPPPPXXXXXXX	VAVPDERFDYLC(1)EHYKPASK	VAVPDERFDYLC(70.56)EHYKPASK	12	5	-0.30274	By MS/MS	By matching	By MS/MS	By matching
C4LT02	148	C4LT02	C4LT02	>tr|C4LT02|C4LT02_ENTHI 40S ribosomal protein S3, putative OS=Entamoeba histolytica OX=5759 GN=EHI_146340 PE=2 SV=1	1	54.066	0.00242405	54.066	35.261	54.066	1	45.598	0.00743752	45.598	1	42.3381	0.00936757	42.338	1	52.4897	0.0033573	52.49	0	0		NaN	1	54.066	0.00242405	54.066	1	42.3381	0.00936757	42.338		1	C	VGSVMRLIMDSGAKGCEVSISGKLRGQRAQG	X;X;X;X;Oxidation (M);X;X;X;Oxidation (M);X;X;X;X;X;X;Carbamidomethyl (C);X;X;X;X;X;X;X;X;X;X;X;X;X;X;X	XXXXXXXXXXXXXXPPPPPPPPPXXXXXXXX	GC(1)EVSISGK	GC(54.07)EVSISGK	2	2	-1.0305	By MS/MS	By MS/MS	By MS/MS	By matching
C4LT02	111	C4LT02	C4LT02	>tr|C4LT02|C4LT02_ENTHI 40S ribosomal protein S3, putative OS=Entamoeba histolytica OX=5759 GN=EHI_146340 PE=2 SV=1	1	60.5499	3.78939e-05	85.522	50.767	60.55	1	70.0893	0.000205772	70.089	1	30.9559	0.000205772	70.089	1	69.92	0.000205772	70.089	1	83.1372	5.39407e-05	83.137	1	60.5499	5.39407e-05	83.137	1	85.5216	3.78939e-05	85.522		1	C	DKIELYVEKVLARGLCPVSQAESIKYKIAEG	X;X;X;X;X;X;X;X;X;X;X;X;X;X;X;Carbamidomethyl (C);X;X;X;X;X;X;X;X;X;X;X;X;X;X;X	XXXXXXXXXXXXXPPPPPPPPPPPPPPXXXX	GLC(1)PVSQAESIKYK	GLC(60.55)PVSQAESIKYK	3	3	0.061779	By MS/MS	By MS/MS	By MS/MS	By MS/MS
C4LT11	3	C4LT11	C4LT11	>tr|C4LT11|C4LT11_ENTHI PQ loop repeat protein OS=Entamoeba histolytica OX=5759 GN=EHI_148410 PE=4 SV=1	1	67.6459	1.60794e-09	119.92	110.62	67.646	1	119.922	1.60794e-09	119.92					1	67.6459	0.00291818	67.646														2	C	_____________MACICPIEDGIEAIEIFR	X;X;X;X;X;X;X;X;X;X;X;X;X;X;X;Carbamidomethyl (C);X;Carbamidomethyl (C);X;X;X;X;X;X;X;X;X;X;X;X;X	XXXXXXXXXXXXXXPPPPPPPPPPPPPPPPP	AC(1)IC(1)PIEDGIEAIEIFR	AC(67.65)IC(67.65)PIEDGIEAIEIFR	2	3	-0.51152	By MS/MS	By matching	By MS/MS	By matching
C4LT11	5	C4LT11	C4LT11	>tr|C4LT11|C4LT11_ENTHI PQ loop repeat protein OS=Entamoeba histolytica OX=5759 GN=EHI_148410 PE=4 SV=1	1	67.6459	1.60794e-09	119.92	110.62	67.646	1	119.922	1.60794e-09	119.92					1	67.6459	0.00291818	67.646														2	C	___________MACICPIEDGIEAIEIFRKY	X;X;X;X;X;X;X;X;X;X;X;X;X;Carbamidomethyl (C);X;Carbamidomethyl (C);X;X;X;X;X;X;X;X;X;X;X;X;X;X;X	XXXXXXXXXXXXPPPPPPPPPPPPPPPPPXX	AC(1)IC(1)PIEDGIEAIEIFR	AC(67.65)IC(67.65)PIEDGIEAIEIFR	4	3	-0.51152	By MS/MS	By matching	By MS/MS	By matching
C4LT17	312	C4LT17	C4LT17	>tr|C4LT17|C4LT17_ENTHI Aspartate--ammonia ligase, putative OS=Entamoeba histolytica OX=5759 GN=EHI_148470 PE=3 SV=1	1	67.9026	0.00281997	67.903	48.388	67.903	1	47.4435	0.0194117	47.443	1	62.6585	0.00316359	62.659	1	67.9026	0.0106208	67.903	1	46.8129	0.0107823	46.813	0	0		NaN	1	64.5671	0.00281997	64.567		1	C	ELPLSIGGGIGQSRLCMFYLQKAHIGEIQAS	X;X;X;X;X;X;X;X;X;X;X;X;X;X;X;Carbamidomethyl (C);X;X;X;X;X;X;X;X;X;X;X;X;X;X;X	XXXXXXXXXXXXXXPPPPPPPPXXXXXXXXX	LC(1)MFYLQK	LC(67.9)MFYLQK	2	2	-0.039294	By MS/MS	By MS/MS	By matching	By MS/MS
C4LT47;C4M5G9	224;224	C4LT47;C4M5G9	C4LT47	>tr|C4LT47|C4LT47_ENTHI Gal/GalNAc lectin light subunit OS=Entamoeba histolytica OX=5759 GN=EHI_148790 PE=4 SV=1;>tr|C4M5G9|C4M5G9_ENTHI Galactose-inhibitable lectin, putative OS=Entamoeba histolytica OX=5759 GN=EHI_058330 PE=2 SV=1	1	44.4398	1.76841e-16	145.39	119.1	44.44	1	93.649	1.76841e-16	145.39					1	92.9393	1.96714e-05	92.939					1	44.4398	0.00257345	44.44						1	C	DYPKHFYLPFSNNNLCYQAKSEGEERSTWTG;SYSKHFYLPFSNNNLCYQAKSEGEERSTWTG	X;X;X;X;X;X;X;X;X;X;X;X;X;X;X;Carbamidomethyl (C);X;X;X;X;X;X;X;X;X;X;X;X;X;X;X	XXXXPPPPPPPPPPPPPPPPXXXXXXXXXXX	HFYLPFSNNNLC(1)YQAK	HFYLPFSNNNLC(44.44)YQAK	12	3	-3.745	By MS/MS	By matching	By MS/MS	By matching
C4LT47	256	C4LT47	C4LT47	>tr|C4LT47|C4LT47_ENTHI Gal/GalNAc lectin light subunit OS=Entamoeba histolytica OX=5759 GN=EHI_148790 PE=4 SV=1	1	170.228	1.31685e-30	193.42	167.3	170.23	1	55.9723	1.31685e-30	193.42	1	126.425	8.09102e-11	126.42	1	163.561	1.22652e-26	180.62	1	139.136	1.53206e-15	139.14	1	170.228	1.71105e-26	177.6	1	97.0826	5.12115e-06	97.083		1	C	AHLKLANSYQIEAASCVANEPRQIFIPVFA_	X;X;X;X;X;X;X;X;X;X;X;X;X;X;X;Carbamidomethyl (C);X;X;X;X;X;X;X;X;X;X;X;X;X;X;X	XXXXPPPPPPPPPPPPPPPPPPXXXXXXXXX	LANSYQIEAASC(1)VANEPR	LANSYQIEAASC(170.23)VANEPR	12	3	-0.43937	By MS/MS	By MS/MS	By MS/MS	By MS/MS
C4M549;C4LT49	22;22	C4M549	C4M549	>tr|C4M549|C4M549_ENTHI 40S ribosomal protein S24, putative OS=Entamoeba histolytica OX=5759 GN=EHI_078300 PE=3 SV=1;>tr|C4LT49|C4LT49_ENTHI 40S ribosomal protein S24, putative OS=Entamoeba histolytica OX=5759 GN=EHI_148820 PE=3 SV=1	1	64.82	6.37714e-05	83.862	36.259	64.82	1	83.8618	6.37714e-05	83.862	1	63.2161	0.000818048	63.216	1	73.8411	0.000176232	73.841	1	82.2868	0.000157628	82.287	1	64.82	0.000369521	71.614	1	70.0282	0.000400996	70.028		1	C	EVTIRTRNLIVNPLLCRKQVVVDIYHPGIVQ	X;X;X;X;X;X;X;X;X;X;X;X;X;X;X;Carbamidomethyl (C);X;X;X;X;X;X;X;X;X;X;X;X;X;X;X	XXXXXXXPPPPPPPPPPPXXXXXXXXXXXXX	NLIVNPLLC(1)RK	NLIVNPLLC(64.82)RK	9	3	-0.090529	By MS/MS	By MS/MS	By MS/MS	By MS/MS
C4LT61	292	C4LT61	C4LT61	>tr|C4LT61|C4LT61_ENTHI Uncharacterized protein OS=Entamoeba histolytica OX=5759 GN=EHI_148940 PE=4 SV=1	1	68.4805	9.8523e-05	68.481	61.19	68.481	1	68.4805	9.8523e-05	68.481																						2	C	LVSHCLCPPDKKGKWCEEQSDVECNLVRLES	X;X;X;X;X;X;X;X;X;X;X;X;X;X;X;Carbamidomethyl (C);X;X;X;X;X;X;X;Carbamidomethyl (C);X;X;X;X;X;X;X	XXXXXXXXXXXXPPPPPPPPPPPPPPPPXXX	GKWC(1)EEQSDVEC(1)NLVR	GKWC(68.48)EEQSDVEC(68.48)NLVR	4	3	-0.84835	By MS/MS	By matching	By matching	By matching
C4LT61	300	C4LT61	C4LT61	>tr|C4LT61|C4LT61_ENTHI Uncharacterized protein OS=Entamoeba histolytica OX=5759 GN=EHI_148940 PE=4 SV=1	1	68.4805	9.8523e-05	68.481	61.19	68.481	1	68.4805	9.8523e-05	68.481																						2	C	PDKKGKWCEEQSDVECNLVRLESNVQSFSQS	X;X;X;X;X;X;X;Carbamidomethyl (C);X;X;X;X;X;X;X;Carbamidomethyl (C);X;X;X;X;X;X;X;X;X;X;X;X;X;X;X	XXXXPPPPPPPPPPPPPPPPXXXXXXXXXXX	GKWC(1)EEQSDVEC(1)NLVR	GKWC(68.48)EEQSDVEC(68.48)NLVR	12	3	-0.84835	By MS/MS	By matching	By matching	By matching
C4LT65;B1N3E4	615;150	C4LT65	C4LT65	>tr|C4LT65|C4LT65_ENTHI Heat shock protein 70, putative OS=Entamoeba histolytica OX=5759 GN=EHI_148990 PE=4 SV=1;>tr|B1N3E4|B1N3E4_ENTHI Uncharacterized protein OS=Entamoeba histolytica OX=5759 GN=EHI_165050 PE=4 SV=1	1	88.1627	2.56423e-06	100.07	70.521	88.163	1	100.071	2.56423e-06	100.07	0	0		NaN	0	0		NaN					1	88.1627	3.06733e-05	88.163	0	0		NaN		1	C	TKITPKVEWEEHIFECAKNETSRFNFFILYH	X;X;X;X;X;X;X;X;X;X;X;X;X;X;X;Carbamidomethyl (C);X;X;X;X;X;X;X;X;X;X;X;X;X;X;X	XXXXXXPPPPPPPPPPPPXXXXXXXXXXXXX	VEWEEHIFEC(1)AK	VEWEEHIFEC(88.16)AK	10	2	1.8908	By MS/MS	By matching	By matching	By matching
C4LT65;B1N3E4	523;58	C4LT65	C4LT65	>tr|C4LT65|C4LT65_ENTHI Heat shock protein 70, putative OS=Entamoeba histolytica OX=5759 GN=EHI_148990 PE=4 SV=1;>tr|B1N3E4|B1N3E4_ENTHI Uncharacterized protein OS=Entamoeba histolytica OX=5759 GN=EHI_165050 PE=4 SV=1	1	41.338	0.0184662	41.338	34.118	41.338	1	41.338	0.0184662	41.338					0	0		NaN					0	0		NaN							C	VDISKSEMKYTAWTNCTEKKYKVINVTEEVN	X;X;X;X;X;X;X;X;X;X;X;X;X;X;X;Carbamidomethyl (C);X;X;X;X;X;X;X;X;X;X;X;X;X;X;X	XXXXXXXXXPPPPPPPPPPXXXXXXXXXXXX	YTAWTNC(1)TEK	YTAWTNC(41.34)TEK	7	2	2.0947	By matching	By matching	By matching	By matching
C4LYP4;C4LT66;C4LSR1	60;60;71	C4LYP4	C4LYP4	>tr|C4LYP4|C4LYP4_ENTHI 40S ribosomal protein S27 OS=Entamoeba histolytica OX=5759 GN=EHI_004200 PE=3 SV=1;>tr|C4LT66|C4LT66_ENTHI 40S ribosomal protein S27 OS=Entamoeba histolytica OX=5759 GN=EHI_149000 PE=3 SV=1;>tr|C4LSR1|C4LSR1_ENTHI 40S ribosomal prot	1	34.0003	0.00586226	42.031	27.351	34	0	0		NaN	1	42.0307	0.00586226	42.031	1	32.9326	0.0223272	32.933	1	26.7115	0.0368341	26.711	1	34.0003	0.0198376	34						1	C	TTTFSHAHRQILCQKCGQPLGQPTGGKLKLT	X;X;X;X;X;X;X;X;X;X;X;X;X;X;X;Carbamidomethyl (C);X;X;X;X;X;X;X;X;X;X;X;X;X;X;X	XXXXXXXXXXXXXXXPPPPPPPPPPPPXXXX	C(1)GQPLGQPTGGK	C(34)GQPLGQPTGGK	1	2	-0.4806	By matching	By MS/MS	By MS/MS	By MS/MS
C4LYP4;C4LT66;C4LSR1	78;78;89	C4LYP4	C4LYP4	>tr|C4LYP4|C4LYP4_ENTHI 40S ribosomal protein S27 OS=Entamoeba histolytica OX=5759 GN=EHI_004200 PE=3 SV=1;>tr|C4LT66|C4LT66_ENTHI 40S ribosomal protein S27 OS=Entamoeba histolytica OX=5759 GN=EHI_149000 PE=3 SV=1;>tr|C4LSR1|C4LSR1_ENTHI 40S ribosomal prot	1	70.8559	0.00161664	70.856	39.096	70.856	0	0		NaN	1	69.9045	0.00161664	69.905	1	70.8559	0.00538904	70.856	0	0		NaN					1	47.7487	0.00840814	47.749		1	C	PLGQPTGGKLKLTQQCKFRIKK_________	X;X;X;X;X;X;X;X;X;X;X;X;X;X;X;Carbamidomethyl (C);X;X;X;X;X;X;X;X;X;X;X;X;X;X;X	XXXXXXXXXPPPPPPPPXXXXXXXXXXXXXX	LKLTQQC(1)K	LKLTQQC(70.86)K	7	2	0.95271	By matching	By MS/MS	By MS/MS	By matching
C4LT71	322	C4LT71	C4LT71	>tr|C4LT71|C4LT71_ENTHI Uncharacterized protein OS=Entamoeba histolytica OX=5759 GN=EHI_044490 PE=4 SV=1	1	47.1869	0.00513387	47.187	15.553	47.187	1	47.1869	0.00513387	47.187																						1	C	RNITSPTKLNIKMSVCEKYYGKNNCPFVENE	X;X;X;X;X;X;X;X;X;X;X;X;X;X;X;Carbamidomethyl (C);X;NEM H2O;X;X;X;Propionamide_aa;X;X;X;X;X;X;X;X;X	XXXXXXXXXXXXPPPPPPPPPPXXXXXXXXX	MSVC(1)EKYYGK	MSVC(47.19)EKYYGK	4	2	4.188	By MS/MS	By matching	By matching	By matching
C4LT92	86	C4LT92	C4LT92	>tr|C4LT92|C4LT92_ENTHI Peptidyl-prolyl cis-trans isomerase OS=Entamoeba histolytica OX=5759 GN=EHI_044730 PE=3 SV=1	1	59.2522	6.51944e-05	69.979	63.774	59.252					0	0		NaN	1	69.979	6.51944e-05	69.979					1	59.2522	0.0001827	59.252	1	22.4346	0.0380067	22.435		1	C	ANQGGSLGWVIRGQMCGAFQDVAFNAPVGKY	X;X;X;X;X;X;X;X;X;X;X;X;X;X;X;Carbamidomethyl (C);X;X;X;X;X;X;X;X;X;X;X;X;X;X;X	XXXXXXXXXXXXPPPPPPPPPPPPPPPPPPX	GQMC(1)GAFQDVAFNAPVGK	GQMC(59.25)GAFQDVAFNAPVGK	4	2	-0.96763	By matching	By matching	By MS/MS	By matching
C4LTA0	195	C4LTA0	C4LTA0	>tr|C4LTA0|C4LTA0_ENTHI 60S ribosomal protein L10, putative OS=Entamoeba histolytica OX=5759 GN=EHI_044810 PE=2 SV=1	1	74.4644	0.000518302	74.464	42.144	74.464	1	63.8162	0.00123595	63.816	1	63.8162	0.00123595	63.816	1	55.0637	0.00212375	55.064	1	47.1869	0.00649682	47.187	1	74.4644	0.000518302	74.464	1	54.9816	0.00213207	54.982		1	C	EYQQLKKDGKIIADGCYFKLATTKGPLPKVN	X;X;X;X;X;X;X;X;X;X;X;X;X;X;X;Carbamidomethyl (C);NEM;X;X;X;X;X;X;X;X;X;X;X;X;X;X;X	XXXXXXXXXXPPPPPPPPPXXXXXXXXXXXX	IIADGC(1)YFK	IIADGC(74.46)YFK	6	2	-0.11007	By MS/MS	By MS/MS	By MS/MS	By MS/MS
C4LTA0;B1N5V8	105;105	C4LTA0	C4LTA0	>tr|C4LTA0|C4LTA0_ENTHI 60S ribosomal protein L10, putative OS=Entamoeba histolytica OX=5759 GN=EHI_044810 PE=2 SV=1;>tr|B1N5V8|B1N5V8_ENTHI Ribosomal protein L10, putative OS=Entamoeba histolytica OX=5759 GN=EHI_185010 PE=4 SV=1	1	134.885	1.0671e-15	134.88	104	134.88	1	37.1767	0.00073708	67.113	1	45.368	0.00270181	52.579	1	82.6513	3.56571e-05	82.651	1	34.6924	0.00270181	52.579	1	134.885	1.0671e-15	134.88	1	45.368	0.00153166	57.532		1	C	RIHPFHVLRINKMLSCAGADRLQTGMRGAWG	X;X;X;X;X;X;X;X;X;X;X;X;Oxidation (M);X;X;Carbamidomethyl (C);X;X;X;X;X;X;X;X;X;Oxidation (M);X;X;X;X;X	XXXXXXXXXXXXPPPPPPPPPPPPPPPXXXX	MLSC(1)AGADRLQTGMR	MLSC(134.88)AGADRLQTGMR	4	3	-0.38703	By MS/MS	By MS/MS	By MS/MS	By MS/MS
C4LTA0	43	C4LTA0	C4LTA0	>tr|C4LTA0|C4LTA0_ENTHI 60S ribosomal protein L10, putative OS=Entamoeba histolytica OX=5759 GN=EHI_044810 PE=2 SV=1	0.999161	29.7972	0.000111744	65.423	60.367	65.423	0.998411	26.9284	0.000778565	50.957					0.999161	29.7972	0.000111744	65.423					0.993482	20.717	0.00215073	40.968	0	0		NaN		2	C	DPRIKLFDIGNRSAPCDDFPCCVHIVGLERE	X;X;X;X;NEM H2O;X;X;X;X;X;X;X;X;X;X;Carbamidomethyl (C);X;X;X;X;Carbamidomethyl (C);NEM;Carbamidomethyl (C);NEM;X;X;X;X;X;X;X;X;X	XXXXXXXXXXXXPPPPPPPPPPPPPPPPPPX	SAPC(0.999)DDFPC(0.2)C(0.801)VHIVGLER	SAPC(29.8)DDFPC(-6.05)C(6.05)VHIVGLER	4	3	-0.88365	By MS/MS	By matching	By MS/MS	By matching
C4LTA0	48	C4LTA0	C4LTA0	>tr|C4LTA0|C4LTA0_ENTHI 60S ribosomal protein L10, putative OS=Entamoeba histolytica OX=5759 GN=EHI_044810 PE=2 SV=1	0.992691	21.3183	0.00105383	50.957	46.199	45.347	0.987482	18.9482	0.00188368	46.494					0.992691	21.3183	0.00154915	45.347					0.822872	6.71953	0.00105383	50.957	0	0		NaN		1;2	C	LFDIGNRSAPCDDFPCCVHIVGLERENISSE	X;X;X;X;X;X;X;X;X;X;Carbamidomethyl (C);NEM;X;X;X;X;Carbamidomethyl (C);Carbamidomethyl (C);NEM;X;X;X;X;X;X;X;X;X;X;X;X;X;X	XXXXXXXPPPPPPPPPPPPPPPPPPXXXXXX	SAPC(0.01)DDFPC(0.993)C(0.997)VHIVGLER	SAPC(-21.32)DDFPC(21.32)C(25.77)VHIVGLER	9	3	-1.2826	By MS/MS	By matching	By MS/MS	By matching
C4LTA0	49	C4LTA0	C4LTA0	>tr|C4LTA0|C4LTA0_ENTHI 60S ribosomal protein L10, putative OS=Entamoeba histolytica OX=5759 GN=EHI_044810 PE=2 SV=1	0.997376	25.767	0.000111744	65.423	60.367	45.347	0.995069	22.9943	0.000778565	50.957					0.997376	25.767	0.000111744	65.423					0.775314	5.34235	0.00215073	40.968	0	0		NaN		2	C	FDIGNRSAPCDDFPCCVHIVGLERENISSEA	X;X;X;X;X;X;X;X;X;Carbamidomethyl (C);NEM;X;X;X;X;Carbamidomethyl (C);NEM;Carbamidomethyl (C);X;X;X;X;X;X;X;X;X;X;X;X;X;X;X	XXXXXXPPPPPPPPPPPPPPPPPPXXXXXXX	SAPC(0.01)DDFPC(0.993)C(0.997)VHIVGLER	SAPC(-21.32)DDFPC(21.32)C(25.77)VHIVGLER	10	3	-1.2826	By MS/MS	By matching	By MS/MS	By matching
C4LTA0	126	C4LTA0	C4LTA0	>tr|C4LTA0|C4LTA0_ENTHI 60S ribosomal protein L10, putative OS=Entamoeba histolytica OX=5759 GN=EHI_044810 PE=2 SV=1	1	51.7872	0.00562768	62.717	59.259	51.787	1	62.7172	0.00562768	62.717	0	0		NaN	1	46.0157	0.0158186	46.016	0	0		NaN	1	51.7872	0.0102738	51.787	1	41.2271	0.0204192	41.227		1	C	LQTGMRGAWGKSYGSCARVKVGQVLISGRCK	X;X;X;X;Oxidation (M);X;X;X;X;X;X;X;X;X;X;Carbamidomethyl (C);X;X;X;X;X;X;X;X;X;X;X;X;X;NEM;NEM H2O	XXXXXXXXXXXPPPPPPPXXXXXXXXXXXXX	SYGSC(1)AR	SYGSC(51.79)AR	5	2	-0.16741	By MS/MS	By matching	By MS/MS	By matching
C4LYJ9;C4LTB5	116;116	C4LYJ9	C4LYJ9	>tr|C4LYJ9|C4LYJ9_ENTHI Actin-related protein 2/3 complex subunit OS=Entamoeba histolytica OX=5759 GN=EHI_094120 PE=3 SV=1;>tr|C4LTB5|C4LTB5_ENTHI Actin-related protein 2/3 complex subunit OS=Entamoeba histolytica OX=5759 GN=EHI_045000 PE=2 SV=1	1	40.3516	0.00736981	51.066	45.626	40.352	0	0		NaN	1	51.0662	0.00736981	51.066	1	40.3516	0.042028	40.352	1	39.3045	0.0173331	39.305	0	0		NaN	1	48.7942	0.0091927	48.794		1	C	AATDIKWSPNESKFACASGNKLVAVCRFNEE	X;X;X;X;X;X;X;X;X;X;X;X;X;X;X;Carbamidomethyl (C);X;X;X;X;X;X;X;X;X;X;X;X;X;X;X	XXXXXXXXXXXXXPPPPPPPPXXXXXXXXXX	FAC(1)ASGNK	FAC(40.35)ASGNK	3	2	-0.039403	By matching	By MS/MS	By matching	By MS/MS
C4LYJ9;C4LTB5	30;30	C4LYJ9	C4LYJ9	>tr|C4LYJ9|C4LYJ9_ENTHI Actin-related protein 2/3 complex subunit OS=Entamoeba histolytica OX=5759 GN=EHI_094120 PE=3 SV=1;>tr|C4LTB5|C4LTB5_ENTHI Actin-related protein 2/3 complex subunit OS=Entamoeba histolytica OX=5759 GN=EHI_045000 PE=2 SV=1	1	51.9491	0.00243744	66.692	41.693	51.949	1	56.2581	0.00431589	56.258	1	56.2581	0.00431589	56.258	1	62.9689	0.00310771	62.969	1	48.4235	0.00949012	48.423	1	51.9491	0.00666149	51.949	1	66.6919	0.00243744	66.692		1	C	CHCWNVDATKIAYSPCSKEIIVASFDGNKFT	X;X;X;X;X;X;X;X;X;X;X;X;X;X;X;Carbamidomethyl (C);X;X;X;X;X;X;X;X;X;X;X;X;X;X;X	XXXXXXXXXXPPPPPPPPXXXXXXXXXXXXX	IAYSPC(1)SK	IAYSPC(51.95)SK	6	2	-1.5693	By MS/MS	By MS/MS	By MS/MS	By MS/MS
C4LYJ9;C4LTB5	72;72	C4LYJ9	C4LYJ9	>tr|C4LYJ9|C4LYJ9_ENTHI Actin-related protein 2/3 complex subunit OS=Entamoeba histolytica OX=5759 GN=EHI_094120 PE=3 SV=1;>tr|C4LTB5|C4LTB5_ENTHI Actin-related protein 2/3 complex subunit OS=Entamoeba histolytica OX=5759 GN=EHI_045000 PE=2 SV=1	1	59.3497	0.00375928	59.35	45.426	59.35	0	0		NaN	1	56.2581	0.00431589	56.258	0	0		NaN	1	47.6028	0.0101486	47.603	1	59.3497	0.00375928	59.35	1	46.4619	0.0110639	46.462		1	C	VTGIDWAAQSNRIVSCSEDRNAYVWTQNENG	X;X;X;X;X;X;X;X;X;X;X;X;X;X;X;Carbamidomethyl (C);X;X;X;X;X;X;X;X;X;X;X;X;X;X;X	XXXXXXXXXXXXPPPPPPPPXXXXXXXXXXX	IVSC(1)SEDR	IVSC(59.35)SEDR	4	2	1.2265	By matching	By MS/MS	By matching	By MS/MS
C4LTC5	523	C4LTC5	C4LTC5	>tr|C4LTC5|C4LTC5_ENTHI Cell division cycle protein 48, putative OS=Entamoeba histolytica OX=5759 GN=EHI_045120 PE=4 SV=1	1	84.7594	2.72503e-07	101.3	84.954	84.759	0	0		NaN	1	58.8852	0.000575718	58.885					1	101.304	2.72503e-07	101.3	1	84.7594	2.08079e-05	84.759	1	91.812	1.07151e-05	91.812		1	C	PGCGKTMMAKAVANECQANFISVKGPELLTM	X;X;Carbamidomethyl (C);X;X;X;X;X;X;X;X;X;X;X;X;Carbamidomethyl (C);X;X;X;X;X;X;X;X;X;X;X;X;X;X;X	XXXXXXXXXXPPPPPPPPPPPPPPXXXXXXX	AVANEC(1)QANFISVK	AVANEC(84.76)QANFISVK	6	2	-0.88442	By matching	By MS/MS	By matching	By MS/MS
C4LTC5;C4LYS4	237;253	C4LTC5;C4LYS4	C4LYS4	>tr|C4LTC5|C4LTC5_ENTHI Cell division cycle protein 48, putative OS=Entamoeba histolytica OX=5759 GN=EHI_045120 PE=4 SV=1;>tr|C4LYS4|C4LYS4_ENTHI Vesicle-fusing ATPase OS=Entamoeba histolytica OX=5759 GN=EHI_004640 PE=3 SV=1	1	32.8592	0.0105851	37.968	26.255	32.859					0	0		NaN					1	37.9681	0.0105851	37.968	1	32.8592	0.0224984	32.859						1	C	GIKHVKGILLYGPPGCGKTLMARQIGKMVSS;GIKPPRGILLYGPPGCGKTMIARAIANETGA	X;X;X;X;X;X;X;X;X;X;X;X;X;X;X;Carbamidomethyl (C);X;X;X;X;X;X;X;X;X;X;X;X;X;X;X	XXXXXXPPPPPPPPPPPPXXXXXXXXXXXXX	GILLYGPPGC(1)GK	GILLYGPPGC(32.86)GK	10	2	-0.56203	By matching	By matching	By matching	By MS/MS
C4LTC5	510	C4LTC5	C4LTC5	>tr|C4LTC5|C4LTC5_ENTHI Cell division cycle protein 48, putative OS=Entamoeba histolytica OX=5759 GN=EHI_045120 PE=4 SV=1	1	45.8289	0.0101411	45.829	35.741	45.829					1	32.9993	0.0221717	32.999					1	45.8289	0.0101411	45.829					0	0		NaN		1	C	GQPPSRGVLFYGPPGCGKTMMAKAVANECQA	X;X;X;X;X;X;X;X;X;X;X;X;X;X;X;Carbamidomethyl (C);X;X;X;X;X;X;X;X;X;X;X;X;Carbamidomethyl (C);X;X	XXXXXXPPPPPPPPPPPPXXXXXXXXXXXXX	GVLFYGPPGC(1)GK	GVLFYGPPGC(45.83)GK	10	2	-0.46421	By matching	By MS/MS	By matching	By MS/MS
C4LTE2	422	C4LTE2	C4LTE2	>tr|C4LTE2|C4LTE2_ENTHI Calpain family cysteine protease, putative OS=Entamoeba histolytica OX=5759 GN=EHI_045290 PE=4 SV=1	1	62.1074	0.000978821	66.351	56.44	62.107	1	54.7125	0.00215938	54.712	0	0		NaN	1	66.3511	0.000978821	66.351	0	0		NaN	1	62.1074	0.00140927	62.107	1	38.5498	0.0343233	38.55		1	C	YITKEASKNAEKCKACGALLPAKGIAKTKIG	X;X;X;X;X;X;X;X;X;X;X;X;X;X;X;Carbamidomethyl (C);X;X;X;X;X;X;X;X;X;X;X;X;X;X;X	XXXXXXXXXXXXXXPPPPPPPPPXXXXXXXX	AC(1)GALLPAK	AC(62.11)GALLPAK	2	2	-1.2525	By MS/MS	By matching	By MS/MS	By matching
C4LTE2	230	C4LTE2	C4LTE2	>tr|C4LTE2|C4LTE2_ENTHI Calpain family cysteine protease, putative OS=Entamoeba histolytica OX=5759 GN=EHI_045290 PE=4 SV=1	1	23.5143	0.0354568	23.514	16.059	23.514									1	23.5143	0.0354568	23.514														2	C	EVDGIKLLKIRNPWGCCEWKGKWRDDDPAWT	X;X;X;X;X;X;X;X;X;X;X;X;X;X;X;Carbamidomethyl (C);Carbamidomethyl (C);X;X;X;X;X;X;X;X;X;X;X;X;X;X	XXXXXXXXXPPPPPPPPPPPXXXXXXXXXXX	IRNPWGC(1)C(1)EWK	IRNPWGC(23.51)C(23.51)EWK	7	3	0.72056	By matching	By matching	By MS/MS	By matching
C4LTE2	231	C4LTE2	C4LTE2	>tr|C4LTE2|C4LTE2_ENTHI Calpain family cysteine protease, putative OS=Entamoeba histolytica OX=5759 GN=EHI_045290 PE=4 SV=1	1	23.5143	0.0354568	23.514	16.059	23.514									1	23.5143	0.0354568	23.514														2	C	VDGIKLLKIRNPWGCCEWKGKWRDDDPAWTE	X;X;X;X;X;X;X;X;X;X;X;X;X;X;Carbamidomethyl (C);Carbamidomethyl (C);X;X;X;X;X;X;X;X;X;X;X;X;X;X;X	XXXXXXXXPPPPPPPPPPPXXXXXXXXXXXX	IRNPWGC(1)C(1)EWK	IRNPWGC(23.51)C(23.51)EWK	8	3	0.72056	By matching	By matching	By MS/MS	By matching
C4LTE2	466	C4LTE2	C4LTE2	>tr|C4LTE2|C4LTE2_ENTHI Calpain family cysteine protease, putative OS=Entamoeba histolytica OX=5759 GN=EHI_045290 PE=4 SV=1	1	26.2681	0.0400441	26.268	7.8895	26.268	0	0		NaN					1	26.2681	0.0400441	26.268									0	0		NaN		2	C	KQLGGKFGLKGQKKLCPDCVAKK________	X;X;X;X;X;X;X;X;X;X;X;X;X;X;X;Carbamidomethyl (C);X;X;Carbamidomethyl (C);X;X;X;X;X;X;X;X;X;X;X;X	XXXXXXXXXXXXXXPPPPPPPPXXXXXXXXX	LC(1)PDC(1)VAK	LC(26.27)PDC(26.27)VAK	2	2	-1.0025	By matching	By matching	By MS/MS	By matching
C4LTE2	469	C4LTE2	C4LTE2	>tr|C4LTE2|C4LTE2_ENTHI Calpain family cysteine protease, putative OS=Entamoeba histolytica OX=5759 GN=EHI_045290 PE=4 SV=1	1	26.2681	0.0400441	26.268	7.8895	26.268	0	0		NaN					1	26.2681	0.0400441	26.268									0	0		NaN		2	C	GGKFGLKGQKKLCPDCVAKK___________	X;X;X;X;X;X;X;X;X;X;X;X;Carbamidomethyl (C);X;X;Carbamidomethyl (C);X;X;X;X;X;X;X;X;X;X;X;X;X;X;X	XXXXXXXXXXXPPPPPPPPXXXXXXXXXXXX	LC(1)PDC(1)VAK	LC(26.27)PDC(26.27)VAK	5	2	-1.0025	By matching	By matching	By MS/MS	By matching
C4LTE2	373	C4LTE2	C4LTE2	>tr|C4LTE2|C4LTE2_ENTHI Calpain family cysteine protease, putative OS=Entamoeba histolytica OX=5759 GN=EHI_045290 PE=4 SV=1	1	68.1214	3.74702e-07	139.78	115.09	68.121	1	106.258	3.74702e-07	139.78	0	0		NaN	1	60.1571	0.000713086	60.157					1	68.1214	0.000255166	68.121	0	0		NaN		1	C	LGSGNHRMIVETHQSCVSKLPFKFTLSFRSG	X;X;X;X;X;X;X;X;X;X;X;X;X;X;X;Carbamidomethyl (C);X;X;X;X;X;X;X;X;X;X;X;X;X;X;X	XXXXXXXPPPPPPPPPPPPXXXXXXXXXXXX	MIVETHQSC(1)VSK	MIVETHQSC(68.12)VSK	9	3	0.34401	By MS/MS	By matching	By MS/MS	By matching
C4LTF7	706	C4LTF7	C4LTF7	>tr|C4LTF7|C4LTF7_ENTHI Ubiquitin carboxyl-terminal hydrolase domain containing protein OS=Entamoeba histolytica OX=5759 GN=EHI_045440 PE=4 SV=1	1	145.137	3.66403e-07	145.14	125.68	145.14	1	145.137	3.66403e-07	145.14					0	0		NaN					0	0		NaN						1	C	QERVEKLKKMDGERKCIDENLIKDLAKTCIH	X;X;X;X;X;X;X;X;X;X;X;X;X;X;X;Carbamidomethyl (C);X;X;X;X;X;X;X;X;X;X;X;X;X;X;X	XXXXXXXXXXXXXXXPPPPPPPPPPPPXXXX	C(1)IDENLIKDLAK	C(145.14)IDENLIKDLAK	1	3	0.19891	By MS/MS	By matching	By matching	By matching
C4LTF7	828	C4LTF7	C4LTF7	>tr|C4LTF7|C4LTF7_ENTHI Ubiquitin carboxyl-terminal hydrolase domain containing protein OS=Entamoeba histolytica OX=5759 GN=EHI_045440 PE=4 SV=1	0.982358	17.4573	0.0270538	48.761	34.348	48.761	0.982358	17.4573	0.0270538	48.761					0	0		NaN	0	0		NaN	0.972647	15.5096	0.0538556	33.358	0	0		NaN			C	FFSKSQRVGSSFRCLCHYIRLFCENPLCSDI	X;X;X;X;X;X;X;X;X;X;X;X;X;NEM;X;Carbamidomethyl (C);X;X;X;X;X;X;X;X;X;X;X;X;X;X;X	XXXXXXXXXXXXXPPPPPPPXXXXXXXXXXX	C(0.018)LC(0.982)HYIR	C(-17.46)LC(17.46)HYIR	3	2	-1.5201	By matching	By matching	By matching	By matching
C4LTF7	1302	C4LTF7	C4LTF7	>tr|C4LTF7|C4LTF7_ENTHI Ubiquitin carboxyl-terminal hydrolase domain containing protein OS=Entamoeba histolytica OX=5759 GN=EHI_045440 PE=4 SV=1	1	55.5305	0.00444687	55.531	19.345	55.531	1	55.5305	0.00444687	55.531	0	0		NaN	0	0		NaN	1	55.5305	0.019323	55.531	0	0		NaN	0	0		NaN		1	C	IRFVNKHSVNKIISLCGQKVCMPQVLKILIP	X;X;X;X;X;X;X;X;X;X;X;X;X;X;X;Carbamidomethyl (C);X;X;X;X;X;X;X;X;X;X;X;X;X;X;X	XXXXXXXXXXXPPPPPPPPXXXXXXXXXXXX	IISLC(1)GQK	IISLC(55.53)GQK	5	2	-0.05542	By MS/MS	By matching	By matching	By matching
C4LTF7	1454	C4LTF7	C4LTF7	>tr|C4LTF7|C4LTF7_ENTHI Ubiquitin carboxyl-terminal hydrolase domain containing protein OS=Entamoeba histolytica OX=5759 GN=EHI_045440 PE=4 SV=1	1	114.862	8.20927e-09	114.86	82.448	114.86	1	114.862	8.20927e-09	114.86					0	0		NaN	1	56.2048	0.00108953	56.205	0	0		NaN	1	84.4793	4.07433e-05	84.479		1	C	LTTKPENAEVIGKVICENQENVILRNEIIEY	X;X;X;X;X;X;X;X;X;X;X;X;X;X;X;Carbamidomethyl (C);X;X;X;X;X;X;X;X;X;X;X;X;X;X;X	XXXXXXXXXXXXXPPPPPPPPPPPPXXXXXX	VIC(1)ENQENVILR	VIC(114.86)ENQENVILR	3	2	1.3977	By MS/MS	By matching	By matching	By MS/MS
C4LTI9	164	C4LTI9	C4LTI9	>tr|C4LTI9|C4LTI9_ENTHI Serine/threonine-protein phosphatase OS=Entamoeba histolytica OX=5759 GN=EHI_011950 PE=3 SV=1	1	40.4773	0.0038699	43.03	27.401	40.477	1	43.0301	0.0038699	43.03									0	0		NaN	1	40.4773	0.00454742	40.477						1	C	FDCLPLSALIDQRYFCVHGGLSPSLKKVDQI	X;X;X;X;X;X;X;X;X;X;X;X;X;X;X;Carbamidomethyl (C);X;X;X;X;X;X;X;X;X;X;X;X;X;X;X	XXXXXXXXXXXXXPPPPPPPPPPPPPXXXXX	YFC(1)VHGGLSPSLK	YFC(40.48)VHGGLSPSLK	3	3	-1.0273	By MS/MS	By matching	By matching	By matching
C4LTJ5	560	C4LTJ5	C4LTJ5	>tr|C4LTJ5|C4LTJ5_ENTHI Beta-hexosaminidase OS=Entamoeba histolytica OX=5759 GN=EHI_012010 PE=3 SV=1	1	53.3001	0.000542258	62.287	49.657	53.3	1	60.9367	0.000615391	60.937					1	62.2875	0.000542258	62.287					1	53.3001	0.00132571	53.3	0	0		NaN		1	C	RRGFLKGTGPLYTSYCDAK____________	X;X;X;X;X;X;X;X;X;X;X;X;X;X;X;Carbamidomethyl (C);X;X;X;X;X;X;X;X;X;X;X;X;X;X;X	XXXXXXPPPPPPPPPPPPPXXXXXXXXXXXX	GTGPLYTSYC(1)DAK	GTGPLYTSYC(53.3)DAK	10	2	-0.54115	By MS/MS	By matching	By MS/MS	By matching
C4LTJ5	450	C4LTJ5	C4LTJ5	>tr|C4LTJ5|C4LTJ5_ENTHI Beta-hexosaminidase OS=Entamoeba histolytica OX=5759 GN=EHI_012010 PE=3 SV=1	1	98.2806	2.13958e-07	110.97	92.836	98.281	1	110.972	2.13958e-07	110.97					1	76.3411	6.36098e-05	76.341					1	98.2806	3.26067e-06	98.281						2	C	AIYSAGLYLDRQVPLCNNFDSSSCGQRYMWV	X;X;X;X;X;X;X;X;X;X;X;X;X;X;X;Carbamidomethyl (C);X;X;X;X;X;X;X;Carbamidomethyl (C);X;X;X;X;X;X;X	XXXXXXXXXXXPPPPPPPPPPPPPPPPXXXX	QVPLC(1)NNFDSSSC(1)GQR	QVPLC(98.28)NNFDSSSC(98.28)GQR	5	2	-0.65711	By MS/MS	By matching	By MS/MS	By matching
C4LTJ5	458	C4LTJ5	C4LTJ5	>tr|C4LTJ5|C4LTJ5_ENTHI Beta-hexosaminidase OS=Entamoeba histolytica OX=5759 GN=EHI_012010 PE=3 SV=1	1	98.2806	2.13958e-07	110.97	92.836	98.281	1	110.972	2.13958e-07	110.97					1	76.3411	6.36098e-05	76.341					1	98.2806	3.26067e-06	98.281						2	C	LDRQVPLCNNFDSSSCGQRYMWVWTTRDFYK	X;X;X;X;X;X;X;Carbamidomethyl (C);X;X;X;X;X;X;X;Carbamidomethyl (C);X;X;X;X;X;X;X;X;X;X;X;X;X;X;X	XXXPPPPPPPPPPPPPPPPXXXXXXXXXXXX	QVPLC(1)NNFDSSSC(1)GQR	QVPLC(98.28)NNFDSSSC(98.28)GQR	13	2	-0.65711	By MS/MS	By matching	By MS/MS	By matching
C4M6Q2;C4LTK7	35;33	C4M6Q2	C4M6Q2	>tr|C4M6Q2|C4M6Q2_ENTHI Uncharacterized protein OS=Entamoeba histolytica OX=5759 GN=EHI_201230 PE=4 SV=1;>tr|C4LTK7|C4LTK7_ENTHI Uncharacterized protein OS=Entamoeba histolytica OX=5759 GN=EHI_012140 PE=4 SV=1	0.99884	32.3618	0.0100361	47.743	14.385	47.743					0	0		NaN	0	0		NaN	0	0		NaN					0.99884	32.3618	0.0100361	47.743		1	C	IPLETPENEEYHLKLCLCPLCKHGIEVFGSK	X;X;X;X;X;X;X;X;X;X;X;X;X;X;X;Carbamidomethyl (C);X;X;X;X;X;X;X;X;X;X;X;X;X;X;X	XXXXXXXXXXXXXXPPPPPPPPXXXXXXXXX	LC(0.999)LC(0.001)PLC(0.001)K	LC(32.36)LC(-32.36)PLC(-32.36)K	2	2	2.7082	By matching	By matching	By matching	By matching
C4LTL7	160	C4LTL7	C4LTL7	>tr|C4LTL7|C4LTL7_ENTHI Rho family GTPase OS=Entamoeba histolytica OX=5759 GN=EHI_012240 PE=3 SV=1	1	78.3239	8.67918e-05	78.324	33.044	78.324	1	37.6134	0.0178372	37.613					1	78.3239	8.67918e-05	78.324														2	C	TTEEGEKLAKDIKAICYMECSALTRSGLNQV	X;X;X;X;X;X;X;X;X;X;X;X;X;X;X;Carbamidomethyl (C);X;X;X;Carbamidomethyl (C);X;X;X;X;X;X;X;X;X;X;X	XXXXXXXXXXXXXPPPPPPPPPPPPXXXXXX	AIC(1)YMEC(1)SALTR	AIC(78.32)YMEC(78.32)SALTR	3	2	-1.5548	By matching	By matching	By MS/MS	By matching
C4LTL7	164	C4LTL7	C4LTL7	>tr|C4LTL7|C4LTL7_ENTHI Rho family GTPase OS=Entamoeba histolytica OX=5759 GN=EHI_012240 PE=3 SV=1	1	78.3239	8.67918e-05	78.324	33.044	78.324	1	37.6134	0.0178372	37.613					1	78.3239	8.67918e-05	78.324														2	C	GEKLAKDIKAICYMECSALTRSGLNQVFDEA	X;X;X;X;X;X;X;X;X;X;X;Carbamidomethyl (C);X;X;X;Carbamidomethyl (C);X;X;X;X;X;X;X;X;X;X;X;X;X;X;X	XXXXXXXXXPPPPPPPPPPPPXXXXXXXXXX	AIC(1)YMEC(1)SALTR	AIC(78.32)YMEC(78.32)SALTR	7	2	-1.5548	By matching	By matching	By MS/MS	By matching
C4LTL7;C4LX92	25;24	C4LTL7;C4LX92	C4LX92	>tr|C4LTL7|C4LTL7_ENTHI Rho family GTPase OS=Entamoeba histolytica OX=5759 GN=EHI_012240 PE=3 SV=1;>tr|C4LX92|C4LX92_ENTHI Rho family GTPase OS=Entamoeba histolytica OX=5759 GN=EHI_013260 PE=3 SV=1	1	73.8341	0.000336582	73.834	46.531	73.834									1	73.8341	0.000336582	73.834														2	C	SVKLVVVGDGAVGKTCLLICYTTNEFPKDYV	X;X;X;X;X;X;X;X;X;X;X;X;X;X;X;Carbamidomethyl (C);X;X;X;Carbamidomethyl (C);X;X;X;X;X;X;X;X;X;X;X	XXXXXXXXXXXXXXPPPPPPPPPPPPPPXXX	TC(1)LLIC(1)YTTNEFPK	TC(73.83)LLIC(73.83)YTTNEFPK	2	2	2.4839	By matching	By matching	By MS/MS	By matching
C4LTL7;C4LX92	29;28	C4LTL7;C4LX92	C4LX92	>tr|C4LTL7|C4LTL7_ENTHI Rho family GTPase OS=Entamoeba histolytica OX=5759 GN=EHI_012240 PE=3 SV=1;>tr|C4LX92|C4LX92_ENTHI Rho family GTPase OS=Entamoeba histolytica OX=5759 GN=EHI_013260 PE=3 SV=1	1	73.8341	0.000336582	73.834	46.531	73.834									1	73.8341	0.000336582	73.834														2	C	VVVGDGAVGKTCLLICYTTNEFPKDYVPTVF	X;X;X;X;X;X;X;X;X;X;X;Carbamidomethyl (C);X;X;X;Carbamidomethyl (C);X;X;X;X;X;X;X;X;X;X;X;X;X;X;X	XXXXXXXXXXPPPPPPPPPPPPPPXXXXXXX	TC(1)LLIC(1)YTTNEFPK	TC(73.83)LLIC(73.83)YTTNEFPK	6	2	2.4839	By matching	By matching	By MS/MS	By matching
C4LTL7;C4LX92	126;125	C4LTL7;C4LX92	C4LX92	>tr|C4LTL7|C4LTL7_ENTHI Rho family GTPase OS=Entamoeba histolytica OX=5759 GN=EHI_012240 PE=3 SV=1;>tr|C4LX92|C4LX92_ENTHI Rho family GTPase OS=Entamoeba histolytica OX=5759 GN=EHI_013260 PE=3 SV=1	1	36.9536	0.00284226	49.934	30.275	36.954	1	22.5778	0.0405462	22.578	0	0		NaN	1	36.9536	0.00284226	49.934					0	0		NaN	0	0		NaN		1	C	YEPKCKMMVVGTKTDCRNDEAMIRKLADENQ	X;X;X;X;X;X;X;X;X;X;X;X;X;X;X;Carbamidomethyl (C);X;X;X;X;X;X;X;X;X;X;X;X;X;X;X	XXXXXXXXXXXXXPPPPPPPPPPPPXXXXXX	TDC(1)RNDEAMIRK	TDC(36.95)RNDEAMIRK	3	4	-0.66752	By MS/MS	By matching	By MS/MS	By matching
C4LTM0	1017	C4LTM0	C4LTM0	>tr|C4LTM0|C4LTM0_ENTHI Gal/GalNAc lectin heavy subunit OS=Entamoeba histolytica OX=5759 GN=EHI_012270 PE=4 SV=1	1	137.577	3.71736e-27	137.58	132.73	137.58	1	112.063	3.71736e-27	123.99					1	99.2187	1.27083e-21	108.24	1	21.5657	0.01761	21.566	1	137.577	9.23893e-27	137.58						3	C	RKAFIEGKEGIEQVECASTVCQNDNSCPIIA	X;X;X;X;X;X;X;X;X;X;X;X;X;X;X;Carbamidomethyl (C);X;X;X;X;Carbamidomethyl (C);X;X;X;X;X;Carbamidomethyl (C);X;X;X;X	XXPPPPPPPPPPPPPPPPPPPPPPPPPPPPP	EGIEQVEC(1)ASTVC(1)QNDNSC(1)PIIADVEK	EGIEQVEC(137.58)ASTVC(137.58)QNDNSC(137.58)PIIADVEK	8	3	-0.80427	By MS/MS	By matching	By MS/MS	By MS/MS
C4LTM0	1022	C4LTM0	C4LTM0	>tr|C4LTM0|C4LTM0_ENTHI Gal/GalNAc lectin heavy subunit OS=Entamoeba histolytica OX=5759 GN=EHI_012270 PE=4 SV=1	1	137.577	3.71736e-27	137.58	132.73	137.58	1	112.063	3.71736e-27	123.99					1	99.2187	1.27083e-21	108.24	1	21.5657	0.01761	21.566	1	137.577	9.23893e-27	137.58						3	C	EGKEGIEQVECASTVCQNDNSCPIIADVEKC	X;X;X;X;X;X;X;X;X;X;Carbamidomethyl (C);X;X;X;X;Carbamidomethyl (C);X;X;X;X;X;Carbamidomethyl (C);X;X;X;X;X;X;X;X;Carbamidomethyl (C);Propionamide_aa	PPPPPPPPPPPPPPPPPPPPPPPPPPPPPPX	EGIEQVEC(1)ASTVC(1)QNDNSC(1)PIIADVEK	EGIEQVEC(137.58)ASTVC(137.58)QNDNSC(137.58)PIIADVEK	13	3	-0.80427	By MS/MS	By matching	By MS/MS	By MS/MS
C4LTM0	1028	C4LTM0	C4LTM0	>tr|C4LTM0|C4LTM0_ENTHI Gal/GalNAc lectin heavy subunit OS=Entamoeba histolytica OX=5759 GN=EHI_012270 PE=4 SV=1	1	137.577	3.71736e-27	137.58	132.73	137.58	1	112.063	3.71736e-27	123.99					1	99.2187	1.27083e-21	108.24	1	21.5657	0.01761	21.566	1	137.577	9.23893e-27	137.58						3	C	EQVECASTVCQNDNSCPIIADVEKCNQNTEV	X;X;X;X;Carbamidomethyl (C);X;X;X;X;Carbamidomethyl (C);X;X;X;X;X;Carbamidomethyl (C);X;X;X;X;X;X;X;X;Carbamidomethyl (C);Propionamide_aa;X;X;X;X;X;X	PPPPPPPPPPPPPPPPPPPPPPPPXXXXXXX	EGIEQVEC(1)ASTVC(1)QNDNSC(1)PIIADVEK	EGIEQVEC(137.58)ASTVC(137.58)QNDNSC(137.58)PIIADVEK	19	3	-0.80427	By MS/MS	By matching	By MS/MS	By MS/MS
C4LTM0	801	C4LTM0	C4LTM0	>tr|C4LTM0|C4LTM0_ENTHI Gal/GalNAc lectin heavy subunit OS=Entamoeba histolytica OX=5759 GN=EHI_012270 PE=4 SV=1	1	48.3756	2.15487e-07	101.45	76.599	48.376	1	56.0365	8.51219e-07	98.654	0	0		NaN	1	29.7197	7.28299e-06	92.939	1	65.3744	0.000236825	65.374	1	48.3756	2.15487e-07	101.45	1	39.1633	1.67958e-05	84.173		2;3	C	SKTGTCKATVKPTPSCSVCEKGKFVEKCKDQ	X;NEM H2O;Propionamide_aa;X;X;X;Carbamidomethyl (C);NEM;NEM H2O;X;X;X;NEM H2O;X;X;X;X;Carbamidomethyl (C);X;X;Carbamidomethyl (C);X;NEM H2O;X;NEM H2O;X;X;X;X;Carbamidomethyl (C);NEM H2O;X;X	XXPPPPPPPPPPPPPPPPPPPPPXXXXXXXX	TGTC(1)KATVKPTPSC(1)SVC(1)EK	TGTC(48.38)KATVKPTPSC(48.38)SVC(48.38)EK	14	4	-0.38113	By MS/MS	By matching	By MS/MS	By MS/MS
C4LTM0	804	C4LTM0	C4LTM0	>tr|C4LTM0|C4LTM0_ENTHI Gal/GalNAc lectin heavy subunit OS=Entamoeba histolytica OX=5759 GN=EHI_012270 PE=4 SV=1	1	48.3756	2.15487e-07	101.45	76.599	48.376	1	56.0365	8.51219e-07	98.654	0	0		NaN	1	29.7197	7.28299e-06	92.939	1	65.3744	0.000236825	65.374	1	48.3756	2.15487e-07	101.45	1	39.1633	1.67958e-05	84.173		1;2;3	C	GTCKATVKPTPSCSVCEKGKFVEKCKDQKLE	X;X;Carbamidomethyl (C);NEM;NEM H2O;X;X;X;NEM H2O;X;X;X;X;Carbamidomethyl (C);Propionamide_aa;X;X;Carbamidomethyl (C);X;NEM H2O;X;NEM H2O;X;X;X;X;Carbamidomethyl (C);NEM H2O;X;X;NEM H2O;X;X	PPPPPPPPPPPPPPPPPPPPXXXXXXXXXXX	TGTC(1)KATVKPTPSC(1)SVC(1)EK	TGTC(48.38)KATVKPTPSC(48.38)SVC(48.38)EK	17	4	-0.38113	By MS/MS	By matching	By MS/MS	By MS/MS
C4LTM0	205	C4LTM0	C4LTM0	>tr|C4LTM0|C4LTM0_ENTHI Gal/GalNAc lectin heavy subunit OS=Entamoeba histolytica OX=5759 GN=EHI_012270 PE=4 SV=1	1	38.8061	0.0240058	38.806	23.367	38.806	1	38.8061	0.0240058	38.806					0	0		NaN					0	0		NaN						1	C	NKDFIDQYNTNTTSKCIIDVHKNNVNTHLAI	X;X;X;X;X;X;X;X;X;X;X;X;X;X;X;Carbamidomethyl (C);X;X;X;X;X;X;X;X;X;X;X;X;X;X;X	XXXXXXXXXXXXXXXPPPPPPPXXXXXXXXX	C(1)IIDVHK	C(38.81)IIDVHK	1	2	0.035568	By MS/MS	By matching	By matching	By matching
C4LTM0	632	C4LTM0	C4LTM0	>tr|C4LTM0|C4LTM0_ENTHI Gal/GalNAc lectin heavy subunit OS=Entamoeba histolytica OX=5759 GN=EHI_012270 PE=4 SV=1	1	76.645	1.57566e-08	121.02	106.34	92.19	1	76.645	3.97225e-07	105.03	1	65.1792	0.000388104	65.179	1	113.609	1.57566e-08	113.61	1	110.077	1.72839e-07	110.08	1	121.021	4.39358e-08	121.02	1	65.1792	0.000388104	65.179		1;2	C	SSKHEICDYTGDKPKCIVSECTEDLVRDGCL	X;X;X;X;X;X;Carbamidomethyl (C);X;X;X;X;X;X;X;X;Carbamidomethyl (C);X;X;X;X;Carbamidomethyl (C);Propionamide_aa;X;X;X;X;X;X;X;X;Carbamidomethyl (C);Propionamide_aa;X	XXXXXXXXXXXXXXXPPPPPPPPPPPPXXXX	C(1)IVSECTEDLVR	C(76.65)IVSEC(-76.65)TEDLVR	1	2	-1.5313	By MS/MS	By MS/MS	By MS/MS	By MS/MS
C4LTM0	637	C4LTM0	C4LTM0	>tr|C4LTM0|C4LTM0_ENTHI Gal/GalNAc lectin heavy subunit OS=Entamoeba histolytica OX=5759 GN=EHI_012270 PE=4 SV=1	1	121.021	1.57566e-08	121.02	106.34	121.02	1	105.032	3.97225e-07	105.03	1	65.1792	0.000388104	65.179	1	113.609	1.57566e-08	113.61	1	110.077	1.72839e-07	110.08	1	121.021	4.39358e-08	121.02	1	65.1792	0.000388104	65.179		1;2	C	ICDYTGDKPKCIVSECTEDLVRDGCLIKRCN	X;Carbamidomethyl (C);X;X;X;X;X;X;X;X;Carbamidomethyl (C);Propionamide_aa;X;X;X;X;Carbamidomethyl (C);X;X;X;X;X;X;X;X;Carbamidomethyl (C);Propionamide_aa;X;X;NEM H2O;X;X;X	XXXXXXXXXXPPPPPPPPPPPPXXXXXXXXX	C(1)IVSEC(1)TEDLVR	C(121.02)IVSEC(121.02)TEDLVR	6	2	-0.88437	By MS/MS	By MS/MS	By MS/MS	By MS/MS
C4LTM0	471	C4LTM0	C4LTM0	>tr|C4LTM0|C4LTM0_ENTHI Gal/GalNAc lectin heavy subunit OS=Entamoeba histolytica OX=5759 GN=EHI_012270 PE=4 SV=1	1	86.5733	1.42497e-15	140.22	128.84	86.573	1	86.5733	1.42497e-15	140.22					1	88.3852	3.45694e-05	88.385					1	81.346	2.79379e-10	122.75	1	35.4728	0.00902704	35.473		3	C	CVVTKYNASCEPKVKCMVPYCDDDNNLKEVC	Carbamidomethyl (C);Propionamide_aa;X;X;X;X;X;X;X;X;Carbamidomethyl (C);Propionamide_aa;X;X;X;X;NEM H2O;Carbamidomethyl (C);Oxidation (M);X;X;X;Carbamidomethyl (C);X;X;X;X;X;X;X;X;X;Carbamidomethyl (C)	XXXXXXXXXXXXXPPPPPPPPPPPPPPPPPP	VKC(1)MVPYC(1)DDDNNLKEVC(1)K	VKC(86.57)MVPYC(86.57)DDDNNLKEVC(86.57)K	3	3	-0.94805	By MS/MS	By matching	By MS/MS	By matching
C4LTM0	476	C4LTM0	C4LTM0	>tr|C4LTM0|C4LTM0_ENTHI Gal/GalNAc lectin heavy subunit OS=Entamoeba histolytica OX=5759 GN=EHI_012270 PE=4 SV=1	1	86.5733	1.42497e-15	140.22	128.84	86.573	1	86.5733	1.42497e-15	140.22					1	88.3852	3.45694e-05	88.385					1	81.346	2.79379e-10	122.75	1	35.4728	0.00902704	35.473		3	C	YNASCEPKVKCMVPYCDDDNNLKEVCKQKAN	X;X;X;X;Carbamidomethyl (C);Propionamide_aa;X;X;X;X;NEM H2O;Carbamidomethyl (C);Oxidation (M);X;X;X;Carbamidomethyl (C);X;X;X;X;X;X;X;X;X;Carbamidomethyl (C);X;X;X;X;X	XXXXXXXXPPPPPPPPPPPPPPPPPPPXXXX	VKC(1)MVPYC(1)DDDNNLKEVC(1)K	VKC(86.57)MVPYC(86.57)DDDNNLKEVC(86.57)K	8	3	-0.94805	By MS/MS	By matching	By MS/MS	By matching
C4LTM0	486	C4LTM0	C4LTM0	>tr|C4LTM0|C4LTM0_ENTHI Gal/GalNAc lectin heavy subunit OS=Entamoeba histolytica OX=5759 GN=EHI_012270 PE=4 SV=1	1	86.5733	1.42497e-15	140.22	128.84	86.573	1	86.5733	1.42497e-15	140.22					1	88.3852	3.45694e-05	88.385					1	81.346	2.79379e-10	122.75	1	35.4728	0.00902704	35.473		3	C	CMVPYCDDDNNLKEVCKQKANCEADQKPSSD	Carbamidomethyl (C);Oxidation (M);X;X;X;Carbamidomethyl (C);X;X;X;X;X;X;X;X;X;Carbamidomethyl (C);X;X;X;X;X;X;X;X;X;X;X;X;X;X;X	PPPPPPPPPPPPPPPPPXXXXXXXXXXXXXX	VKC(1)MVPYC(1)DDDNNLKEVC(1)K	VKC(86.57)MVPYC(86.57)DDDNNLKEVC(86.57)K	18	3	-0.94805	By MS/MS	By matching	By MS/MS	By matching
C4LTM0	739	C4LTM0	C4LTM0	>tr|C4LTM0|C4LTM0_ENTHI Gal/GalNAc lectin heavy subunit OS=Entamoeba histolytica OX=5759 GN=EHI_012270 PE=4 SV=1	1	85.493	1.503e-05	85.493	54.926	85.493	1	85.493	1.503e-05	85.493																						2	C	DCDSRKSQCGNFNGKCQPNGDNSYSCVFEKD	X;X;X;X;X;NEM H2O;X;X;Carbamidomethyl (C);Propionamide_aa;X;X;X;X;X;X;Carbamidomethyl (C);X;X;X;X;X;X;X;X;X;Carbamidomethyl (C);X;X;X;X;X	XXXXXXXXXXXXXXXPPPPPPPPPPPPPPPX	C(1)QPNGDNSYSC(1)VFEK	C(85.49)QPNGDNSYSC(85.49)VFEK	1	2	-2.3366	By MS/MS	By matching	By matching	By matching
C4LTM0	749	C4LTM0	C4LTM0	>tr|C4LTM0|C4LTM0_ENTHI Gal/GalNAc lectin heavy subunit OS=Entamoeba histolytica OX=5759 GN=EHI_012270 PE=4 SV=1	1	85.493	1.503e-05	85.493	54.926	85.493	1	85.493	1.503e-05	85.493																						2	C	NFNGKCQPNGDNSYSCVFEKDKTSSKSDNDI	X;X;X;X;X;Carbamidomethyl (C);X;X;X;X;X;X;X;X;X;Carbamidomethyl (C);X;X;X;X;X;X;X;X;X;X;X;X;X;X;X	XXXXXPPPPPPPPPPPPPPPXXXXXXXXXXX	C(1)QPNGDNSYSC(1)VFEK	C(85.49)QPNGDNSYSC(85.49)VFEK	11	2	-2.3366	By MS/MS	By matching	By matching	By matching
C4LTM0	543	C4LTM0	C4LTM0	>tr|C4LTM0|C4LTM0_ENTHI Gal/GalNAc lectin heavy subunit OS=Entamoeba histolytica OX=5759 GN=EHI_012270 PE=4 SV=1	1	47.0883	0.000904188	47.088	42.471	47.088									1	47.0883	0.000904188	47.088														2;3	C	KTTNCQEYVCDSEQRCTVQEKVCVKTSPYIE	NEM H2O;X;X;X;Carbamidomethyl (C);Propionamide_aa;X;X;X;X;Carbamidomethyl (C);Propionamide_aa;X;X;X;X;X;Carbamidomethyl (C);X;X;X;X;X;X;Carbamidomethyl (C);X;NEM H2O;X;X;X;X;X;X	XPPPPPPPPPPPPPPPPPPPPPPPPXXXXXX	TTNC(1)QEYVC(1)DSEQRC(1)TVQEK	TTNC(47.09)QEYVC(47.09)DSEQRC(47.09)TVQEK	15	3	0.1219	By matching	By matching	By MS/MS	By matching
C4LTM0	550	C4LTM0	C4LTM0	>tr|C4LTM0|C4LTM0_ENTHI Gal/GalNAc lectin heavy subunit OS=Entamoeba histolytica OX=5759 GN=EHI_012270 PE=4 SV=1	1	69.1111	8.71089e-05	69.111	57.852	69.111	1	69.1111	8.71089e-05	69.111					1	30.8894	0.0386307	30.889														2	C	YVCDSEQRCTVQEKVCVKTSPYIEMSCYVAK	X;X;Carbamidomethyl (C);Propionamide_aa;X;X;X;X;X;Carbamidomethyl (C);X;X;X;X;X;X;Carbamidomethyl (C);X;NEM H2O;X;X;X;X;X;X;Oxidation (M);X;Carbamidomethyl (C);Propionamide_aa;X;X;X;NEM H2O	XXXXXXXXPPPPPPPPPPPPPPPPPPPPPPP	VC(1)VKTSPYIEMSC(1)YVAK	VC(69.11)VKTSPYIEMSC(69.11)YVAK	2	2	2.6183	By MS/MS	By matching	By MS/MS	By matching
C4LTM0	838	C4LTM0	C4LTM0	>tr|C4LTM0|C4LTM0_ENTHI Gal/GalNAc lectin heavy subunit OS=Entamoeba histolytica OX=5759 GN=EHI_012270 PE=4 SV=1	1	48.7732	1.36808e-11	137.98	135.3	48.773	1	103.534	1.36808e-11	117.7	1	105.975	2.86151e-06	105.98	1	46.8619	2.46769e-06	108.43	1	137.976	9.4482e-05	137.98	1	48.7732	5.07813e-05	129.85	1	102.524	3.41485e-06	102.52		1;2	C	TLEDGKEYQYNIPKDCVNEQCIPRTYVDCLA	X;X;X;X;X;X;X;X;X;X;X;X;X;X;X;Carbamidomethyl (C);X;X;X;X;Carbamidomethyl (C);Propionamide_aa;X;X;X;X;X;X;X;Carbamidomethyl (C);X;X	PPPPPPPPPPPPPPPPPPPPPPPPXXXXXXX	VTLEDGKEYQYNIPKDC(1)VNEQC(1)IPR	VTLEDGKEYQYNIPKDC(48.77)VNEQC(48.77)IPR	17	4	-1.5018	By MS/MS	By MS/MS	By MS/MS	By MS/MS
C4LTM0	843	C4LTM0	C4LTM0	>tr|C4LTM0|C4LTM0_ENTHI Gal/GalNAc lectin heavy subunit OS=Entamoeba histolytica OX=5759 GN=EHI_012270 PE=4 SV=1	1	48.7732	1.36808e-11	137.98	135.3	48.773	1	103.534	1.36808e-11	117.7	1	105.975	2.86151e-06	105.98	1	46.8619	2.46769e-06	108.43	1	137.976	9.4482e-05	137.98	1	48.7732	5.07813e-05	129.85	1	102.524	3.41485e-06	102.52		1;2	C	KEYQYNIPKDCVNEQCIPRTYVDCLANDDNF	X;X;X;X;X;X;X;X;X;X;Carbamidomethyl (C);Propionamide_aa;X;X;X;X;Carbamidomethyl (C);X;X;X;X;X;X;X;Carbamidomethyl (C);X;X;X;X;X;X;X	PPPPPPPPPPPPPPPPPPPXXXXXXXXXXXX	VTLEDGKEYQYNIPKDC(1)VNEQC(1)IPR	VTLEDGKEYQYNIPKDC(48.77)VNEQC(48.77)IPR	22	4	-1.5018	By MS/MS	By MS/MS	By MS/MS	By MS/MS
C4LTM0	646	C4LTM0	C4LTM0	>tr|C4LTM0|C4LTM0_ENTHI Gal/GalNAc lectin heavy subunit OS=Entamoeba histolytica OX=5759 GN=EHI_012270 PE=4 SV=1	1	32.61	0.00458726	88.643	64.671	32.61	1	42.0946	0.00458726	88.643	0	0		NaN	1	38.7917	0.00614375	81.297	1	84.2437	0.00551102	84.244	1	32.61	0.00614375	81.297	1	86.8662	0.00496034	86.866		1	C	KCIVSECTEDLVRDGCLIKRCNKTSKTTYWE	X;Carbamidomethyl (C);Propionamide_aa;X;X;X;X;Carbamidomethyl (C);Propionamide_aa;X;X;X;X;X;X;X;X;Carbamidomethyl (C);X;X;NEM H2O;X;X;X;X;X;X;X;X;X;X;X;X	XXXXXXXXXXXXXPPPPPPPXXXXXXXXXXX	DGC(1)LIKR	DGC(32.61)LIKR	3	2	0.41855	By MS/MS	By matching	By MS/MS	By MS/MS
C4LTM0	456	C4LTM0	C4LTM0	>tr|C4LTM0|C4LTM0_ENTHI Gal/GalNAc lectin heavy subunit OS=Entamoeba histolytica OX=5759 GN=EHI_012270 PE=4 SV=1	1	48.2865	1.44842e-53	219.35	209.41	48.286	1	202.441	1.44842e-53	219.35	1	40.4964	0.0104579	40.496	1	60.1711	3.75052e-06	77.576	1	46.8189	0.00671471	46.819	1	48.2865	6.44186e-06	72.676	1	50.8578	0.00029469	50.858		1;4	C	PATCVGLYECKDLEGCVVTKYNASCEPKVKC	X;X;X;Carbamidomethyl (C);Propionamide_aa;X;X;X;X;X;Carbamidomethyl (C);X;X;X;X;X;Carbamidomethyl (C);X;X;X;X;X;X;X;X;Carbamidomethyl (C);Propionamide_aa;X;X;X;X;NEM H2O;Carbamidomethyl (C)	PPPPPPPPPPPPPPPPPPPPXXXXXXXXXXX	KEC(1)PATC(1)VGLYEC(1)KDLEGC(1)VVTK	KEC(48.29)PATC(48.29)VGLYEC(48.29)KDLEGC(48.29)VVTK	19	4	2.4109	By MS/MS	By MS/MS	By MS/MS	By MS/MS
C4LTM0;C4M8N3;P32022;B1N3C7	907;912;899;914	C4LTM0;C4M8N3;P32022	C4M8N3	>tr|C4LTM0|C4LTM0_ENTHI Gal/GalNAc lectin heavy subunit OS=Entamoeba histolytica OX=5759 GN=EHI_012270 PE=4 SV=1;>tr|C4M8N3|C4M8N3_ENTHI Galactose-specific adhesin 170kD subunit OS=Entamoeba histolytica OX=5759 GN=EHI_077500 PE=4 SV=1;>sp|P32022|GIL1_ENTHI	1	50.9863	7.49926e-47	237.4	214	50.986	1	50.9863	7.49926e-47	237.4	1	68.9778	0.000117014	68.978	1	65.2482	1.16852e-15	145.04	1	34.0003	2.11564e-10	124.25	1	137.027	6.39435e-30	215.23	1	56.8717	0.000433096	56.872		1	C	PQSEEFMKEADKEAYCTYEITTRECKTCSLI;PQSEEFMKEADKEAYCTYEITTRECKTCSLT	X;X;X;X;X;X;Oxidation (M);NEM H2O;X;X;X;NEM H2O;X;X;X;Carbamidomethyl (C);X;X;X;X;X;X;X;X;Carbamidomethyl (C);NEM;NEM H2O;Propionamide_aa;X;Carbamidomethyl (C);Propionamide_aa;X;X;X	PPPPPPPPPPPPPPPPPPPPPPPXXXXXXXX	LHLPQSEEFMKEADKEAYC(1)TYEITTR	LHLPQSEEFMKEADKEAYC(50.99)TYEITTR	19	4	-2.4888	By MS/MS	By MS/MS	By MS/MS	By MS/MS
C4LTM0	440	C4LTM0	C4LTM0	>tr|C4LTM0|C4LTM0_ENTHI Gal/GalNAc lectin heavy subunit OS=Entamoeba histolytica OX=5759 GN=EHI_012270 PE=4 SV=1	1	48.2865	1.44842e-53	219.35	209.41	48.286	1	202.441	1.44842e-53	219.35					1	60.1711	1.27949e-10	115.66	1	60.1963	0.000437012	60.196	1	48.2865	1.0425e-10	118.31	1	50.8578	0.00029469	56.569		2;3;4	C	SCIPWPKAKPKAKKECPATCVGLYECKDLEG	X;X;X;X;X;X;X;X;X;X;X;X;X;X;X;Carbamidomethyl (C);X;X;X;Carbamidomethyl (C);Propionamide_aa;X;X;X;X;X;Carbamidomethyl (C);X;X;X;X;X	XXXXXXXXXXXXXPPPPPPPPPPPPPPPPPP	KEC(1)PATC(1)VGLYEC(1)KDLEGC(1)VVTK	KEC(48.29)PATC(48.29)VGLYEC(48.29)KDLEGC(48.29)VVTK	3	4	2.4109	By MS/MS	By matching	By MS/MS	By MS/MS
C4LTM0	444	C4LTM0	C4LTM0	>tr|C4LTM0|C4LTM0_ENTHI Gal/GalNAc lectin heavy subunit OS=Entamoeba histolytica OX=5759 GN=EHI_012270 PE=4 SV=1	1	48.2865	1.44842e-53	219.35	209.41	48.286	1	202.441	1.44842e-53	219.35					1	60.1711	1.27949e-10	115.66	1	60.1963	0.000437012	60.196	1	48.2865	1.0425e-10	118.31	1	50.8578	0.00029469	56.569		3;4	C	WPKAKPKAKKECPATCVGLYECKDLEGCVVT	X;X;X;X;X;X;X;X;X;X;X;Carbamidomethyl (C);X;X;X;Carbamidomethyl (C);X;X;X;X;X;Carbamidomethyl (C);X;X;X;X;X;Carbamidomethyl (C);Propionamide_aa;X;X;X	XXXXXXXXXPPPPPPPPPPPPPPPPPPPPPP	KEC(1)PATC(1)VGLYEC(1)KDLEGC(1)VVTK	KEC(48.29)PATC(48.29)VGLYEC(48.29)KDLEGC(48.29)VVTK	7	4	2.4109	By MS/MS	By matching	By MS/MS	By MS/MS
C4LTM0	450	C4LTM0	C4LTM0	>tr|C4LTM0|C4LTM0_ENTHI Gal/GalNAc lectin heavy subunit OS=Entamoeba histolytica OX=5759 GN=EHI_012270 PE=4 SV=1	1	48.2865	1.44842e-53	219.35	209.41	48.286	1	202.441	1.44842e-53	219.35					1	60.1711	1.27949e-10	115.66	1	60.1963	0.000437012	60.196	1	48.2865	1.0425e-10	118.31	1	50.8578	0.00029469	56.569		2;3;4	C	KAKKECPATCVGLYECKDLEGCVVTKYNASC	X;X;X;X;X;Carbamidomethyl (C);X;X;X;Carbamidomethyl (C);Propionamide_aa;X;X;X;X;X;Carbamidomethyl (C);X;X;X;X;X;Carbamidomethyl (C);Propionamide_aa;X;X;X;X;X;X;X;X;Carbamidomethyl (C);Propionamide_aa	XXXPPPPPPPPPPPPPPPPPPPPPPPXXXXX	KEC(1)PATC(1)VGLYEC(1)KDLEGC(1)VVTK	KEC(48.29)PATC(48.29)VGLYEC(48.29)KDLEGC(48.29)VVTK	13	4	2.4109	By MS/MS	By matching	By MS/MS	By MS/MS
C4LTM0	934	C4LTM0	C4LTM0	>tr|C4LTM0|C4LTM0_ENTHI Gal/GalNAc lectin heavy subunit OS=Entamoeba histolytica OX=5759 GN=EHI_012270 PE=4 SV=1	1	107.387	2.59406e-46	226.67	166.51	107.39	1	105.659	3.18953e-25	211.7	0	0		NaN	1	65.0429	1.44614e-40	226.67	1	59.7088	1.1923e-07	107.35	1	107.387	2.59406e-46	211.57	1	84.7594	1.74407e-05	84.759		1;2	C	CSLTETKEKVEEIDLCAEETKNGGVPFKCKN	Carbamidomethyl (C);Propionamide_aa;X;X;X;X;X;X;X;X;X;X;X;X;X;X;Carbamidomethyl (C);X;X;X;X;X;X;X;X;X;X;X;X;Carbamidomethyl (C);NEM H2O;Propionamide_aa;X	PPPPPPPPPPPPPPPPPPPPPPPPPPPPXXX	VEEIDLC(1)AEETK	VEEIDLC(107.39)AEETK	7	2	-0.083452	By MS/MS	By matching	By MS/MS	By MS/MS
C4LTM0	623	C4LTM0	C4LTM0	>tr|C4LTM0|C4LTM0_ENTHI Gal/GalNAc lectin heavy subunit OS=Entamoeba histolytica OX=5759 GN=EHI_012270 PE=4 SV=1	1	67.2517	4.35178e-08	166.7	143.38	67.252	1	166.704	4.35178e-08	166.7					1	67.2517	0.000296372	67.252					0	0		NaN						1	C	KVENGNYCDSSKHEICDYTGDKPKCIVSECT	X;X;X;X;X;X;X;Carbamidomethyl (C);X;X;X;X;X;X;X;Carbamidomethyl (C);X;X;X;X;X;X;X;X;Carbamidomethyl (C);Propionamide_aa;X;X;X;X;Carbamidomethyl (C);Propionamide_aa;X	XXXXXXXXXXXXPPPPPPPPPPPPXXXXXXX	HEIC(1)DYTGDKPK	HEIC(67.25)DYTGDKPK	4	3	0.89229	By MS/MS	By matching	By MS/MS	By matching
C4LTM0	69	C4LTM0	C4LTM0	>tr|C4LTM0|C4LTM0_ENTHI Gal/GalNAc lectin heavy subunit OS=Entamoeba histolytica OX=5759 GN=EHI_012270 PE=4 SV=1	1	38.5799	2.23332e-05	126.19	94.7	38.58	1	110.077	8.68397e-07	110.08					1	31.3475	2.23332e-05	126.19					1	38.5799	7.22812e-06	122.7						1	C	YYLAMQPWRHFVWTTCETTKGNKECYKYIIN	X;X;X;X;X;X;X;X;X;X;X;X;X;X;X;Carbamidomethyl (C);X;X;X;X;X;X;X;X;X;X;X;X;X;X;X	XXXXXXXXXPPPPPPPPPPPXXXXXXXXXXX	HFVWTTC(1)ETTK	HFVWTTC(38.58)ETTK	7	3	-0.8521	By MS/MS	By matching	By MS/MS	By matching
C4LTM0	525	C4LTM0	C4LTM0	>tr|C4LTM0|C4LTM0_ENTHI Gal/GalNAc lectin heavy subunit OS=Entamoeba histolytica OX=5759 GN=EHI_012270 PE=4 SV=1	1	60.6413	1.97371e-17	129.85	117.96	60.641	1	43.9578	1.97371e-17	129.85					1	52.1672	0.000668455	85.862	1	74.9199	0.00164468	74.92	1	60.6413	0.00099175	90.15	1	81.9717	0.00124527	81.972		1;3	C	DETTGFCKKYKHGNLCTGKTTNCQEYVCDSE	X;X;X;X;X;X;X;X;NEM H2O;X;NEM H2O;X;X;X;X;Carbamidomethyl (C);X;X;NEM H2O;X;X;X;Carbamidomethyl (C);Propionamide_aa;X;X;X;X;Carbamidomethyl (C);Propionamide_aa;X;X;X	XXXXXXXXPPPPPPPPPPPPPPPPPPPPPPP	YKHGNLC(1)TGK	YKHGNLC(60.64)TGK	7	3	0.12524	By MS/MS	By matching	By MS/MS	By MS/MS
C4LTM0	532	C4LTM0	C4LTM0	>tr|C4LTM0|C4LTM0_ENTHI Gal/GalNAc lectin heavy subunit OS=Entamoeba histolytica OX=5759 GN=EHI_012270 PE=4 SV=1	1	47.0883	1.97371e-17	150.05	145	47.088	1	78.5055	1.97371e-17	150.05	1	60.5499	0.00040035	60.55	1	47.0883	1.3773e-11	132.08	1	117.203	6.81722e-11	117.2	1	72.2094	1.70579e-11	133.48	1	26.5909	0.00048067	58.079		1;2;3	C	KKYKHGNLCTGKTTNCQEYVCDSEQRCTVQE	X;NEM H2O;X;NEM H2O;X;X;X;X;Carbamidomethyl (C);X;X;NEM H2O;X;X;X;Carbamidomethyl (C);X;X;X;X;Carbamidomethyl (C);Propionamide_aa;X;X;X;X;X;Carbamidomethyl (C);X;X;X;X	XXXXPPPPPPPPPPPPPPPPPPPPPPPPPPP	TTNC(1)QEYVC(1)DSEQRC(1)TVQEK	TTNC(47.09)QEYVC(47.09)DSEQRC(47.09)TVQEK	4	3	0.1219	By MS/MS	By MS/MS	By MS/MS	By MS/MS
C4LTM0	537	C4LTM0	C4LTM0	>tr|C4LTM0|C4LTM0_ENTHI Gal/GalNAc lectin heavy subunit OS=Entamoeba histolytica OX=5759 GN=EHI_012270 PE=4 SV=1	1	47.0883	1.97371e-17	150.05	145	47.088	1	94.5279	1.97371e-17	150.05	1	60.5499	0.00040035	60.55	1	47.0883	1.3773e-11	132.08	1	117.203	6.81722e-11	117.2	1	72.2094	1.70579e-11	133.48	1	26.5909	0.00048067	58.079		1;2;3	C	GNLCTGKTTNCQEYVCDSEQRCTVQEKVCVK	X;X;X;Carbamidomethyl (C);X;X;NEM H2O;X;X;X;Carbamidomethyl (C);Propionamide_aa;X;X;X;X;Carbamidomethyl (C);X;X;X;X;X;Carbamidomethyl (C);X;X;X;X;X;X;Carbamidomethyl (C);X;NEM H2O	PPPPPPPPPPPPPPPPPPPPPPPPPPPXXXX	TTNC(1)QEYVC(1)DSEQRC(1)TVQEK	TTNC(47.09)QEYVC(47.09)DSEQRC(47.09)TVQEK	9	3	0.1219	By MS/MS	By MS/MS	By MS/MS	By MS/MS
C4LTM0	106	C4LTM0	C4LTM0	>tr|C4LTM0|C4LTM0_ENTHI Gal/GalNAc lectin heavy subunit OS=Entamoeba histolytica OX=5759 GN=EHI_012270 PE=4 SV=1	1	101.421	1.17941e-28	222.34	205.67	101.42	1	101.421	1.17941e-28	222.34	1	75.3872	0.000246929	75.387	1	93.6488	3.92319e-05	145.28	1	180.066	8.74685e-09	180.07	1	93.6488	8.7627e-06	167.09	1	79.9855	0.000170414	79.986		1	C	AQQLNNIKNLDKQDFCQKEYAYPIEKYEVDW	X;X;X;X;X;X;X;X;X;X;X;X;X;X;X;Carbamidomethyl (C);X;X;X;X;X;X;X;X;X;X;X;X;X;X;X	XXXXXXXXPPPPPPPPPPPPPPPPPPXXXXX	QDFC(1)QKEYAYPIEK	QDFC(101.42)QKEYAYPIEK	4	2	-0.84803	By MS/MS	By MS/MS	By MS/MS	By MS/MS
C4LTM0	1125	C4LTM0	C4LTM0	>tr|C4LTM0|C4LTM0_ENTHI Gal/GalNAc lectin heavy subunit OS=Entamoeba histolytica OX=5759 GN=EHI_012270 PE=4 SV=1	1	119.498	7.80012e-93	283.49	276.45	119.5	1	159.748	8.37468e-55	244.52	1	25.9866	0.00213846	39.992	1	77.2698	7.80012e-93	283.49	1	50.3582	0.000844799	50.358	1	119.498	1.4497e-65	254.44	1	151.584	1.4574e-22	151.58		1;2	C	IDTERSNIDPKPRNPCETATCDQTTGETIYT	X;X;X;X;X;X;X;X;X;X;X;X;X;X;X;Carbamidomethyl (C);X;X;X;X;Carbamidomethyl (C);Propionamide_aa;X;X;X;X;X;X;X;X;X;X	XXXXXXXXXXXXXPPPPPPPPPPPPPPPPPP	NPC(1)ETATC(1)DQTTGETIYTKK	NPC(119.5)ETATC(119.5)DQTTGETIYTKK	3	3	-0.09519	By MS/MS	By MS/MS	By MS/MS	By MS/MS
C4LTM0	1130	C4LTM0	C4LTM0	>tr|C4LTM0|C4LTM0_ENTHI Gal/GalNAc lectin heavy subunit OS=Entamoeba histolytica OX=5759 GN=EHI_012270 PE=4 SV=1	1	119.498	7.80012e-93	283.49	276.45	119.5	1	159.748	8.37468e-55	244.52	1	25.9866	0.00213846	39.992	1	77.2698	7.80012e-93	283.49	1	50.3582	0.000844799	50.358	1	119.498	1.4497e-65	254.44	1	151.584	1.4574e-22	151.58		1;2	C	SNIDPKPRNPCETATCDQTTGETIYTKKTCT	X;X;X;X;X;X;X;X;X;X;Carbamidomethyl (C);Propionamide_aa;X;X;X;X;Carbamidomethyl (C);X;X;X;X;X;X;X;X;X;X;NEM H2O;NEM H2O;Propionamide_aa;X;Carbamidomethyl (C);Propionamide_aa;X	XXXXXXXXPPPPPPPPPPPPPPPPPPPPXXX	NPC(1)ETATC(1)DQTTGETIYTKK	NPC(119.5)ETATC(119.5)DQTTGETIYTKK	8	3	-0.09519	By MS/MS	By MS/MS	By MS/MS	By MS/MS
C4LTM0;P32022;B1N3C7	765;757;772	C4LTM0;P32022	P32022	>tr|C4LTM0|C4LTM0_ENTHI Gal/GalNAc lectin heavy subunit OS=Entamoeba histolytica OX=5759 GN=EHI_012270 PE=4 SV=1;>sp|P32022|GIL1_ENTHI Galactose-inhibitable lectin 170 kDa subunit OS=Entamoeba histolytica OX=5759 PE=1 SV=2;>tr|B1N3C7|B1N3C7_ENTHI Galactose	1	65.8011	2.95143e-153	325.11	281.32	65.801	1	54.6747	1.60954e-99	284.65	1	24.9013	0.013855	24.901	1	154.602	1.35321e-40	202.86	1	112.362	4.4855e-09	112.36	1	65.8011	2.95143e-153	325.11	1	43.9561	2.47138e-06	82.635		2;3	C	VFEKDKTSSKSDNDICAECSSLTCPADTTYR	X;X;X;X;X;NEM H2O;X;X;X;X;X;X;X;X;X;Carbamidomethyl (C);X;X;Carbamidomethyl (C);Propionamide_aa;X;X;X;X;Carbamidomethyl (C);Propionamide_aa;X;X;X;X;X;X;X	XXXXXXPPPPPPPPPPPPPPPPPPPPPPPPP	TSSKSDNDIC(1)AEC(1)SSLTC(1)PADTTYR	TSSKSDNDIC(65.8)AEC(65.8)SSLTC(65.8)PADTTYR	10	3	-0.46664	By MS/MS	By MS/MS	By MS/MS	By MS/MS
C4LTM0;P32022;B1N3C7	768;760;775	C4LTM0;P32022	P32022	>tr|C4LTM0|C4LTM0_ENTHI Gal/GalNAc lectin heavy subunit OS=Entamoeba histolytica OX=5759 GN=EHI_012270 PE=4 SV=1;>sp|P32022|GIL1_ENTHI Galactose-inhibitable lectin 170 kDa subunit OS=Entamoeba histolytica OX=5759 PE=1 SV=2;>tr|B1N3C7|B1N3C7_ENTHI Galactose	1	65.8011	2.95143e-153	325.11	281.32	65.801	1	54.6747	1.60954e-99	284.65	1	24.9013	0.013855	24.901	1	154.602	1.35321e-40	202.86	1	112.362	4.4855e-09	112.36	1	65.8011	2.95143e-153	325.11	1	43.9561	2.47138e-06	82.635		2;3	C	KDKTSSKSDNDICAECSSLTCPADTTYRTYT	X;X;NEM H2O;X;X;X;X;X;X;X;X;X;Carbamidomethyl (C);Propionamide_aa;X;X;Carbamidomethyl (C);X;X;X;X;Carbamidomethyl (C);Propionamide_aa;X;X;X;X;X;X;X;X;X;X	XXXPPPPPPPPPPPPPPPPPPPPPPPPPXXX	TSSKSDNDIC(1)AEC(1)SSLTC(1)PADTTYR	TSSKSDNDIC(65.8)AEC(65.8)SSLTC(65.8)PADTTYR	13	3	-0.46664	By MS/MS	By MS/MS	By MS/MS	By MS/MS
C4LTM0;P32022;B1N3C7	773;765;780	C4LTM0;P32022	P32022	>tr|C4LTM0|C4LTM0_ENTHI Gal/GalNAc lectin heavy subunit OS=Entamoeba histolytica OX=5759 GN=EHI_012270 PE=4 SV=1;>sp|P32022|GIL1_ENTHI Galactose-inhibitable lectin 170 kDa subunit OS=Entamoeba histolytica OX=5759 PE=1 SV=2;>tr|B1N3C7|B1N3C7_ENTHI Galactose	1	65.8011	2.95143e-153	325.11	281.32	65.801	1	54.6747	1.60954e-99	284.65	1	24.9013	0.013855	24.901	1	81.1711	1.35321e-40	202.86	1	112.362	4.4855e-09	112.36	1	65.8011	2.95143e-153	325.11	1	43.9561	2.47138e-06	82.635		1;2;3	C	SKSDNDICAECSSLTCPADTTYRTYTYDSKT	X;X;X;X;X;X;X;Carbamidomethyl (C);Propionamide_aa;X;X;Carbamidomethyl (C);Propionamide_aa;X;X;X;X;Carbamidomethyl (C);X;X;X;X;X;X;X;X;X;X;X;X;X;NEM H2O;Propionamide_aa;X	PPPPPPPPPPPPPPPPPPPPPPPXXXXXXXX	TSSKSDNDIC(1)AEC(1)SSLTC(1)PADTTYR	TSSKSDNDIC(65.8)AEC(65.8)SSLTC(65.8)PADTTYR	18	3	-0.46664	By MS/MS	By MS/MS	By MS/MS	By MS/MS
C4LTM0	919	C4LTM0	C4LTM0	>tr|C4LTM0|C4LTM0_ENTHI Gal/GalNAc lectin heavy subunit OS=Entamoeba histolytica OX=5759 GN=EHI_012270 PE=4 SV=1	1	96.5498	2.59406e-46	211.06	187.03	96.55	1	72.5683	1.66215e-09	99.603	1	97.635	0.000868801	97.635	1	193.639	1.44614e-40	193.64	1	88.3697	0.00105514	88.37	1	96.5498	2.59406e-46	211.06	1	86.6702	0.00111243	86.67		1;2	C	EAYCTYEITTRECKTCSLTETKEKVEEIDLC	X;X;X;Carbamidomethyl (C);Propionamide_aa;X;X;X;X;X;X;X;X;X;X;X;Carbamidomethyl (C);X;X;X;X;X;X;X;X;X;X;X;X;X;X;Carbamidomethyl (C)	XXXXXXXXXXXXXXPPPPPPPPPPPPPPPPP	TC(1)SLTETKEKVEEIDLC(1)AEETK	TC(96.55)SLTETKEKVEEIDLC(96.55)AEETK	2	4	-0.051899	By MS/MS	By MS/MS	By MS/MS	By MS/MS
C4LTM0	791	C4LTM0	C4LTM0	>tr|C4LTM0|C4LTM0_ENTHI Gal/GalNAc lectin heavy subunit OS=Entamoeba histolytica OX=5759 GN=EHI_012270 PE=4 SV=1	1	56.493	1.06141e-07	126.12	90.85	56.493	1	115.574	1.06141e-07	126.12	0	0		NaN	1	55.2612	4.73122e-06	107.97	0	0		NaN	1	56.493	7.66784e-06	104.24	0	0		NaN		1;3	C	DTTYRTYTYDSKTGTCKATVKPTPSCSVCEK	X;X;X;X;X;X;X;X;X;X;X;NEM H2O;X;X;X;Carbamidomethyl (C);NEM H2O;X;X;X;NEM H2O;X;X;X;X;Carbamidomethyl (C);Propionamide_aa;X;X;Carbamidomethyl (C);X;NEM H2O	XXXXXPPPPPPPPPPPPPPPPPPPPPPPPPP	TYTYDSKTGTC(1)K	TYTYDSKTGTC(56.49)K	11	3	0.41398	By MS/MS	By matching	By MS/MS	By matching
C4LTM0	561	C4LTM0	C4LTM0	>tr|C4LTM0|C4LTM0_ENTHI Gal/GalNAc lectin heavy subunit OS=Entamoeba histolytica OX=5759 GN=EHI_012270 PE=4 SV=1	1	69.1111	1.62765e-08	100.22	43.048	69.111	1	69.1111	1.62765e-08	99.844	1	70.4379	0.000149648	70.438	1	41.2269	1.80161e-07	100.22	1	73.9271	0.000115288	73.927	1	22.3203	0.00010372	75.102	1	65.0429	0.000393083	65.043		1;2;3	C	QEKVCVKTSPYIEMSCYVAKCNLNTGMCENR	X;X;X;X;Carbamidomethyl (C);X;NEM H2O;X;X;X;X;X;X;Oxidation (M);X;Carbamidomethyl (C);X;X;X;NEM H2O;Carbamidomethyl (C);Propionamide_aa;X;X;X;X;X;Oxidation (M);Carbamidomethyl (C);Propionamide_aa;X;X;X	XXXPPPPPPPPPPPPPPPPPPPPPPPPPPPP	VC(1)VKTSPYIEMSC(1)YVAK	VC(69.11)VKTSPYIEMSC(69.11)YVAK	13	2	2.6183	By MS/MS	By MS/MS	By MS/MS	By MS/MS
C4LTM0	991	C4LTM0	C4LTM0	>tr|C4LTM0|C4LTM0_ENTHI Gal/GalNAc lectin heavy subunit OS=Entamoeba histolytica OX=5759 GN=EHI_012270 PE=4 SV=1	1	62.2875	0.000218369	88.136	66.836	62.287	1	35.0369	0.000218369	88.136					1	69.92	0.000232128	69.92					1	62.2875	0.000720004	62.287						1	C	DGIKTTTCKDTGKTTCDTNNKRIEDARKAFI	X;X;X;NEM H2O;X;X;X;Carbamidomethyl (C);X;X;X;X;X;X;X;Carbamidomethyl (C);X;X;X;X;NEM H2O;X;X;X;X;X;X;X;X;X;X	XXXXXXXXXXXXXPPPPPPPPPPPPPPXXXX	TTC(1)DTNNKRIEDAR	TTC(62.29)DTNNKRIEDAR	3	3	-0.26108	By MS/MS	By matching	By MS/MS	By matching
C4LTM0	665	C4LTM0	C4LTM0	>tr|C4LTM0|C4LTM0_ENTHI Gal/GalNAc lectin heavy subunit OS=Entamoeba histolytica OX=5759 GN=EHI_012270 PE=4 SV=1	1	153.191	6.95717e-23	189.3	167.75	153.19	1	146.146	1.61096e-22	146.15	0	0		NaN	1	102.45	8.99088e-19	189.3	1	22.3271	0.0456086	22.327	1	153.191	6.95717e-23	153.19	1	102.903	1.44977e-07	102.9		1	C	RCNKTSKTTYWENVDCSNTKIEFAQDGKSET	X;X;X;X;X;X;X;X;X;X;X;X;X;X;X;Carbamidomethyl (C);X;X;X;X;X;X;X;X;X;X;X;X;X;X;X	XXXXXXXPPPPPPPPPPPPPPPPPPPPPXXX	TTYWENVDC(1)SNTKIEFAQDGK	TTYWENVDC(153.19)SNTKIEFAQDGK	9	3	-0.36918	By MS/MS	By matching	By MS/MS	By MS/MS
C4LTM0	851	C4LTM0	C4LTM0	>tr|C4LTM0|C4LTM0_ENTHI Gal/GalNAc lectin heavy subunit OS=Entamoeba histolytica OX=5759 GN=EHI_012270 PE=4 SV=1	1	52.7307	1.13081e-43	218.78	193.33	52.731	1	218.78	1.13081e-43	218.78					1	153.725	4.6482e-22	153.72	1	88.3852	1.711e-06	100.04	1	52.7307	2.44145e-15	139.49	1	74.1408	7.34871e-07	107.98		1	C	KDCVNEQCIPRTYVDCLANDDNFGEIYKFYL	X;X;Carbamidomethyl (C);Propionamide_aa;X;X;X;X;Carbamidomethyl (C);Propionamide_aa;X;X;X;X;X;X;X;Carbamidomethyl (C);X;X;X;X;X;X;X;X;X;X;X;X;X;X;X	XXXXXXXXXXXPPPPPPPPPPPPPPPPPXXX	TYVDC(1)LANDDNFGEIYK	TYVDC(52.73)LANDDNFGEIYK	5	2	-3.6309	By MS/MS	By matching	By MS/MS	By MS/MS
C4LTM0	615	C4LTM0	C4LTM0	>tr|C4LTM0|C4LTM0_ENTHI Gal/GalNAc lectin heavy subunit OS=Entamoeba histolytica OX=5759 GN=EHI_012270 PE=4 SV=1	1	78.9027	0.000153723	78.903	54.93	78.903	1	78.9027	0.000153723	78.903																						1	C	TGNQCKCNKVENGNYCDSSKHEICDYTGDKP	X;X;X;X;X;X;X;X;X;X;X;X;X;X;X;Carbamidomethyl (C);X;X;X;X;X;X;X;Carbamidomethyl (C);X;X;X;X;X;X;X	XXXXXXXXXPPPPPPPPPPPXXXXXXXXXXX	VENGNYC(1)DSSK	VENGNYC(78.9)DSSK	7	2	-0.80538	By MS/MS	By matching	By matching	By matching
C4LTM0	465	C4LTM0	C4LTM0	>tr|C4LTM0|C4LTM0_ENTHI Gal/GalNAc lectin heavy subunit OS=Entamoeba histolytica OX=5759 GN=EHI_012270 PE=4 SV=1	1	43.9787	0.00190886	70.256	33.495	43.979	1	58.9807	0.00382573	58.981	1	49.7151	0.00845384	49.715	1	67.8382	0.00223107	67.838	1	70.2558	0.00190886	70.256	1	43.9787	0.0130561	43.979	1	68.0161	0.00219904	68.016		1	C	CKDLEGCVVTKYNASCEPKVKCMVPYCDDDN	Carbamidomethyl (C);X;X;X;X;X;Carbamidomethyl (C);Propionamide_aa;X;X;X;X;X;X;X;X;Carbamidomethyl (C);X;X;X;X;NEM H2O;Carbamidomethyl (C);Oxidation (M);X;X;X;Carbamidomethyl (C);X;X;X;X	XXXXXXXXXXXPPPPPPPPXXXXXXXXXXXX	YNASC(1)EPK	YNASC(43.98)EPK	5	2	0.11085	By MS/MS	By MS/MS	By MS/MS	By MS/MS
C4LTM1	289	C4LTM1	C4LTM1	>sp|C4LTM1|SEY11_ENTHI Protein SEY1 homolog 1 OS=Entamoeba histolytica OX=5759 GN=EHI_012280 PE=3 SV=1	1	21.9125	8.92018e-05	75.088	60.86	21.913	1	75.0877	8.92018e-05	75.088					1	21.9125	0.0384273	21.913					0	0		NaN						1	C	LEDIMKIWESVARPECFKRAPIDKFFDLEFT	X;X;X;X;X;X;X;X;X;X;X;X;X;X;X;Carbamidomethyl (C);X;X;X;X;X;X;X;X;X;X;X;X;X;X;X	XXXXXXPPPPPPPPPPPPPXXXXXXXXXXXX	IWESVARPEC(1)FKR	IWESVARPEC(21.91)FKR	10	4	-0.402	By MS/MS	By matching	By matching	By matching
C4LTM2	433	C4LTM2	C4LTM2	>tr|C4LTM2|C4LTM2_ENTHI Ubiquitin carboxyl-terminal hydrolase OS=Entamoeba histolytica OX=5759 GN=EHI_012290 PE=3 SV=1	1	28.9033	0.0271503	39.73	26.722	28.903	1	39.7304	0.0488765	39.73					1	28.9033	0.0271503	28.903														2	C	IITDLFAAQLKSKVICDVCHNTNMRFDPYVF	X;X;X;X;X;X;X;X;X;X;X;X;X;X;X;Carbamidomethyl (C);X;X;Carbamidomethyl (C);X;X;X;X;X;X;X;X;X;X;X;X	XXXXXXXXXXXXXPPPPPPPPPPPPXXXXXX	VIC(1)DVC(1)HNTNMR	VIC(28.9)DVC(28.9)HNTNMR	3	3	-2.2928	By MS/MS	By matching	By matching	By matching
C4LTM2	436	C4LTM2	C4LTM2	>tr|C4LTM2|C4LTM2_ENTHI Ubiquitin carboxyl-terminal hydrolase OS=Entamoeba histolytica OX=5759 GN=EHI_012290 PE=3 SV=1	1	28.9033	0.0271503	39.73	26.722	28.903	1	39.7304	0.0488765	39.73					1	28.9033	0.0271503	28.903														2	C	DLFAAQLKSKVICDVCHNTNMRFDPYVFLSL	X;X;X;X;X;X;X;X;X;X;X;X;Carbamidomethyl (C);X;X;Carbamidomethyl (C);X;X;X;X;X;X;X;X;X;X;X;X;X;X;X	XXXXXXXXXXPPPPPPPPPPPPXXXXXXXXX	VIC(1)DVC(1)HNTNMR	VIC(28.9)DVC(28.9)HNTNMR	6	3	-2.2928	By MS/MS	By matching	By matching	By matching
C4LTM7	216	C4LTM7	C4LTM7	>tr|C4LTM7|C4LTM7_ENTHI Uncharacterized protein OS=Entamoeba histolytica OX=5759 GN=EHI_012340 PE=4 SV=1	1	44.1668	0.000580377	44.167	40.046	44.167					0	0		NaN									1	44.1668	0.000580377	44.167	0	0		NaN		1	C	HRATTADTVINVFDNCDSMNPIPTKMTACED	X;X;X;X;X;X;X;X;X;X;X;X;X;X;X;Carbamidomethyl (C);X;X;Oxidation (M);X;X;X;X;X;X;Oxidation (M);X;X;Carbamidomethyl (C);X;X	XXPPPPPPPPPPPPPPPPPPPPPPPXXXXXX	ATTADTVINVFDNC(1)DSMNPIPTK	ATTADTVINVFDNC(44.17)DSMNPIPTK	14	3	-0.14266	By matching	By matching	By matching	By matching
C4LTM7	534	C4LTM7	C4LTM7	>tr|C4LTM7|C4LTM7_ENTHI Uncharacterized protein OS=Entamoeba histolytica OX=5759 GN=EHI_012340 PE=4 SV=1	1	92.611	5.05461e-30	166.69	144.46	92.611	1	166.692	5.05461e-30	166.69	0	0		NaN	1	84.5074	1.29676e-05	84.507	0	0		NaN	1	92.611	1.66531e-05	92.611	0	0		NaN		1	C	VSVFMRRDYHINHDTCKTALEFNAPFTLVEY	X;X;X;X;X;X;X;X;X;X;X;X;X;X;X;Carbamidomethyl (C);X;X;X;X;X;X;X;X;X;X;X;X;X;X;X	XXXXXXXPPPPPPPPPPXXXXXXXXXXXXXX	DYHINHDTC(1)K	DYHINHDTC(92.61)K	9	2	-0.12456	By MS/MS	By matching	By MS/MS	By matching
C4LTM7;C4MBF6	742;718	C4LTM7;C4MBF6	C4LTM7	>tr|C4LTM7|C4LTM7_ENTHI Uncharacterized protein OS=Entamoeba histolytica OX=5759 GN=EHI_012340 PE=4 SV=1;>tr|C4MBF6|C4MBF6_ENTHI Uncharacterized protein OS=Entamoeba histolytica OX=5759 GN=EHI_161650 PE=4 SV=1	1	96.4641	4.9502e-11	143.98	123.2	96.464	1	143.976	4.9502e-11	143.98	0	0		NaN	1	94.7168	4.258e-06	94.717	0	0		NaN	1	96.4641	2.62931e-06	96.464	0	0		NaN		1	C	YKYSSTVKGKLHINTCNAATSVRTRMGVYRS;YTYSASVKGKLHINTCNAATSVRTRMGVYKS	X;X;X;X;X;X;X;X;X;X;X;X;X;X;X;Carbamidomethyl (C);X;X;X;X;X;X;X;X;X;X;X;X;X;X;X	XXXXXXXXPPPPPPPPPPPPPPPXXXXXXXX	LHINTC(1)NAATSVR	LHINTC(96.46)NAATSVR	6	2	0.045297	By MS/MS	By matching	By MS/MS	By matching
C4LTM7	200	C4LTM7	C4LTM7	>tr|C4LTM7|C4LTM7_ENTHI Uncharacterized protein OS=Entamoeba histolytica OX=5759 GN=EHI_012340 PE=4 SV=1	1	37.6544	0.00835537	37.654	18.982	37.654	1	37.6544	0.00835537	37.654																						1	C	FYVLKGTGDKIHIGTCHRATTADTVINVFDN	X;X;X;X;X;X;X;X;X;X;X;X;X;X;X;Carbamidomethyl (C);X;X;X;X;X;X;X;X;X;X;X;X;X;X;X	XXXXXPPPPPPPPPPPPPXXXXXXXXXXXXX	GTGDKIHIGTC(1)HR	GTGDKIHIGTC(37.65)HR	11	3	0.32152	By MS/MS	By matching	By matching	By matching
C4LTM7	406	C4LTM7	C4LTM7	>tr|C4LTM7|C4LTM7_ENTHI Uncharacterized protein OS=Entamoeba histolytica OX=5759 GN=EHI_012340 PE=4 SV=1	1	128.01	1.09401e-51	226.81	202.33	128.01	1	226.806	1.09401e-51	226.81	0	0		NaN	1	143.396	1.38201e-17	143.4	1	52.4505	0.000354987	52.451	1	128.01	2.543e-12	128.01	1	35.6764	0.00560709	35.676		1	C	TLNVDKINPQGTVNSCIFSKLVSITSKDDSF	X;X;X;X;X;X;X;X;X;X;X;X;X;X;X;Carbamidomethyl (C);X;X;X;X;X;X;X;X;X;X;X;X;X;X;X	PPPPPPPPPPPPPPPPPPPPXXXXXXXXXXX	VTLNVDKINPQGTVNSC(1)IFSK	VTLNVDKINPQGTVNSC(128.01)IFSK	17	3	-0.015255	By MS/MS	By matching	By MS/MS	By MS/MS
C4LTM7	670	C4LTM7	C4LTM7	>tr|C4LTM7|C4LTM7_ENTHI Uncharacterized protein OS=Entamoeba histolytica OX=5759 GN=EHI_012340 PE=4 SV=1	1	69.4309	9.8459e-07	103.13	83.025	69.431	1	103.131	9.8459e-07	103.13					1	44.045	0.00265735	44.045					1	69.4309	9.02305e-05	69.431						1	C	FRLNVYTLNPPSHSTCQKAELLTPGLTQYAL	X;X;X;X;X;X;X;X;X;X;X;X;X;X;X;Carbamidomethyl (C);X;X;X;X;X;X;X;X;X;X;X;X;X;X;X	XXPPPPPPPPPPPPPPPPXXXXXXXXXXXXX	LNVYTLNPPSHSTC(1)QK	LNVYTLNPPSHSTC(69.43)QK	14	3	-0.7409	By MS/MS	By matching	By MS/MS	By matching
C4LTM7	303	C4LTM7	C4LTM7	>tr|C4LTM7|C4LTM7_ENTHI Uncharacterized protein OS=Entamoeba histolytica OX=5759 GN=EHI_012340 PE=4 SV=1	1	98.2806	4.29393e-17	157.58	120.4	98.281	1	133.278	4.29393e-17	157.58	1	41.695	0.0036577	41.695	1	96.2077	1.88943e-16	144.29	1	24.4806	0.0352903	24.481	1	98.2806	4.90204e-16	142.91	1	68.4805	0.000128357	68.481		1	C	FAHTTKLTGTTQSMSCGSSVEKVGSWYSIVG	X;X;X;X;X;X;X;X;X;X;X;X;X;Oxidation (M);X;Carbamidomethyl (C);X;X;X;X;X;X;X;X;X;X;X;X;X;X;X	XXXXXXPPPPPPPPPPPPPPPPXXXXXXXXX	LTGTTQSMSC(1)GSSVEK	LTGTTQSMSC(98.28)GSSVEK	10	2	-0.81684	By MS/MS	By MS/MS	By MS/MS	By MS/MS
C4LTM7	229	C4LTM7	C4LTM7	>tr|C4LTM7|C4LTM7_ENTHI Uncharacterized protein OS=Entamoeba histolytica OX=5759 GN=EHI_012340 PE=4 SV=1	1	81.2391	6.21587e-05	81.239	71.584	81.239	1	81.2391	6.21587e-05	81.239					1	73.8812	0.000161648	73.881					1	59.2273	0.000888179	59.227	1	35.774	0.0359133	35.774		1	C	DNCDSMNPIPTKMTACEDGNMGSKIHIDTVP	X;X;Carbamidomethyl (C);X;X;Oxidation (M);X;X;X;X;X;X;Oxidation (M);X;X;Carbamidomethyl (C);X;X;X;X;Oxidation (M);X;X;X;X;X;X;X;X;X;X	XXXXXXXXXXXXPPPPPPPPPPPPXXXXXXX	MTAC(1)EDGNMGSK	MTAC(81.24)EDGNMGSK	4	2	0.75245	By MS/MS	By matching	By MS/MS	By matching
C4LTM7	154	C4LTM7	C4LTM7	>tr|C4LTM7|C4LTM7_ENTHI Uncharacterized protein OS=Entamoeba histolytica OX=5759 GN=EHI_012340 PE=4 SV=1	1	189.315	2.93762e-47	189.32	177.4	189.32	1	189.315	2.93762e-47	189.32																							C	FGLRIIKNPSFSNKQCSHAADITEYPSFREG	X;X;X;X;X;X;X;X;X;X;X;X;X;X;X;Carbamidomethyl (C);X;X;X;X;X;X;X;X;X;X;X;X;X;X;X	XXXXXXXXXXXXXXPPPPPPPPPPPPPPPXX	QC(1)SHAADITEYPSFR	QC(189.32)SHAADITEYPSFR	2	2	-1.3961	By matching	By matching	By matching	By matching
C4LTM7	484	C4LTM7	C4LTM7	>tr|C4LTM7|C4LTM7_ENTHI Uncharacterized protein OS=Entamoeba histolytica OX=5759 GN=EHI_012340 PE=4 SV=1	1	63.4265	0.000173692	85.807	45.87	63.426	1	85.8073	0.000173692	85.807	1	22.5616	0.0416013	22.562	1	60.167	0.00126781	60.167	1	51.4359	0.00314263	51.436	1	63.4265	0.00100682	63.426	1	52.4897	0.00265015	52.49		2	C	ASSTKHTAEIQMYRTCSLECEERQYSVHHVL	X;X;X;X;X;X;X;X;X;X;X;Oxidation (M);X;X;X;Carbamidomethyl (C);X;X;X;Carbamidomethyl (C);X;X;X;X;X;X;X;X;X;X;X	XXXXXXXXXXXXXXPPPPPPPPPXXXXXXXX	TC(1)SLEC(1)EER	TC(63.43)SLEC(63.43)EER	2	2	-0.82065	By MS/MS	By MS/MS	By MS/MS	By MS/MS
C4LTM7	488	C4LTM7	C4LTM7	>tr|C4LTM7|C4LTM7_ENTHI Uncharacterized protein OS=Entamoeba histolytica OX=5759 GN=EHI_012340 PE=4 SV=1	1	63.4265	0.000173692	85.807	45.87	63.426	1	85.8073	0.000173692	85.807	1	22.5616	0.0416013	22.562	1	60.167	0.00126781	60.167	1	51.4359	0.00314263	51.436	1	63.4265	0.00100682	63.426	1	52.4897	0.00265015	52.49		2	C	KHTAEIQMYRTCSLECEERQYSVHHVLLKPK	X;X;X;X;X;X;X;Oxidation (M);X;X;X;Carbamidomethyl (C);X;X;X;Carbamidomethyl (C);X;X;X;X;X;X;X;X;X;X;X;X;X;X;X	XXXXXXXXXXPPPPPPPPPXXXXXXXXXXXX	TC(1)SLEC(1)EER	TC(63.43)SLEC(63.43)EER	6	2	-0.82065	By MS/MS	By MS/MS	By MS/MS	By MS/MS
C4LTM7	561	C4LTM7	C4LTM7	>tr|C4LTM7|C4LTM7_ENTHI Uncharacterized protein OS=Entamoeba histolytica OX=5759 GN=EHI_012340 PE=4 SV=1	1	63.5651	0.00300038	63.565	48.901	63.565	1	52.7161	0.00604611	52.716	0	0		NaN	0	0		NaN	0	0		NaN	1	63.5651	0.00300038	63.565						1	C	LVEYKPNTGKTTTPICAKDVVGRHTGIYYYF	X;X;X;X;X;X;X;X;X;X;X;X;X;X;X;Carbamidomethyl (C);X;X;X;X;X;X;X;X;X;X;X;X;X;X;X	XXXXXXXXXXPPPPPPPPXXXXXXXXXXXXX	TTTPIC(1)AK	TTTPIC(63.57)AK	6	2	0.6005	By MS/MS	By matching	By matching	By matching
C4LTM7	72	C4LTM7	C4LTM7	>tr|C4LTM7|C4LTM7_ENTHI Uncharacterized protein OS=Entamoeba histolytica OX=5759 GN=EHI_012340 PE=4 SV=1	1	131.037	4.96542e-19	131.04	123.78	131.04	1	131.037	4.96542e-19	131.04																						1	C	RVHTAGLGNNIEVDTCLSGITNYDSKIAVFG	X;X;X;X;X;X;X;X;X;X;X;X;X;X;X;Carbamidomethyl (C);X;X;X;X;X;X;X;X;X;X;X;X;X;X;X	XPPPPPPPPPPPPPPPPPPPPPPPPPXXXXX	VHTAGLGNNIEVDTC(1)LSGITNYDSK	VHTAGLGNNIEVDTC(131.04)LSGITNYDSK	15	3	1.1004	By MS/MS	By matching	By matching	By matching
C4LTM7	381	C4LTM7	C4LTM7	>tr|C4LTM7|C4LTM7_ENTHI Uncharacterized protein OS=Entamoeba histolytica OX=5759 GN=EHI_012340 PE=4 SV=1	1	112.129	4.92489e-07	112.13	104.89	112.13	1	112.129	4.92489e-07	112.13																						2	C	SKKLELGKNYFIKVSCSNPHNQCRVTLNVDK	X;X;X;X;X;X;X;X;X;X;X;X;X;X;X;Carbamidomethyl (C);X;X;X;X;X;X;Carbamidomethyl (C);X;X;X;X;X;X;X;X	XXXXXXXXXXXXXPPPPPPPPPPPXXXXXXX	VSC(1)SNPHNQC(1)R	VSC(112.13)SNPHNQC(112.13)R	3	3	-1.8267	By MS/MS	By matching	By matching	By matching
C4LTM7	388	C4LTM7	C4LTM7	>tr|C4LTM7|C4LTM7_ENTHI Uncharacterized protein OS=Entamoeba histolytica OX=5759 GN=EHI_012340 PE=4 SV=1	1	112.129	4.92489e-07	112.13	104.89	112.13	1	112.129	4.92489e-07	112.13																						2	C	KNYFIKVSCSNPHNQCRVTLNVDKINPQGTV	X;X;X;X;X;X;X;X;Carbamidomethyl (C);X;X;X;X;X;X;Carbamidomethyl (C);X;X;X;X;X;X;X;X;X;X;X;X;X;X;X	XXXXXXPPPPPPPPPPPXXXXXXXXXXXXXX	VSC(1)SNPHNQC(1)R	VSC(112.13)SNPHNQC(112.13)R	10	3	-1.8267	By MS/MS	By matching	By matching	By matching
C4LTM7	696	C4LTM7	C4LTM7	>tr|C4LTM7|C4LTM7_ENTHI Uncharacterized protein OS=Entamoeba histolytica OX=5759 GN=EHI_012340 PE=4 SV=1	1	102.731	7.12956e-11	152.4	105.96	102.73									1	152.399	7.12956e-11	152.4					1	102.731	6.94861e-07	102.73	0	0		NaN		1	C	TQYALTKYAYESVSNCKPNVKHDMQSLLYGV	X;X;X;X;X;X;X;X;X;X;X;X;X;X;X;Carbamidomethyl (C);X;X;X;X;X;X;X;X;X;X;X;X;X;X;X	XXXXXXXPPPPPPPPPPPPPPXXXXXXXXXX	YAYESVSNC(1)KPNVK	YAYESVSNC(102.73)KPNVK	9	2	-0.58078	By matching	By matching	By MS/MS	By matching
C4LTM9	40	C4LTM9	C4LTM9	>tr|C4LTM9|C4LTM9_ENTHI Rab family GTPase OS=Entamoeba histolytica OX=5759 GN=EHI_012380 PE=3 SV=1	1	59.1984	0.000854653	59.198	10.775	59.198	0	0		NaN					1	52.3906	0.00189665	52.391					1	59.1984	0.000854653	59.198						2	C	YITGKYTGTEKASVSCDVSCKKLNIEGEAYN	X;X;X;X;X;X;X;X;X;X;X;X;X;X;X;Carbamidomethyl (C);X;X;X;Carbamidomethyl (C);X;X;X;X;X;X;X;X;X;X;X	XXXXXXXXXXXPPPPPPPPPPXXXXXXXXXX	ASVSC(1)DVSC(1)K	ASVSC(59.2)DVSC(59.2)K	5	2	-0.27373	By matching	By matching	By MS/MS	By matching
C4LTM9	44	C4LTM9	C4LTM9	>tr|C4LTM9|C4LTM9_ENTHI Rab family GTPase OS=Entamoeba histolytica OX=5759 GN=EHI_012380 PE=3 SV=1	1	59.1984	0.000854653	59.198	10.775	59.198	0	0		NaN					1	52.3906	0.00189665	52.391					1	59.1984	0.000854653	59.198						2	C	KYTGTEKASVSCDVSCKKLNIEGEAYNLQLW	X;X;X;X;X;X;X;X;X;X;X;Carbamidomethyl (C);X;X;X;Carbamidomethyl (C);X;X;X;X;X;X;X;X;X;X;X;X;X;X;X	XXXXXXXPPPPPPPPPPXXXXXXXXXXXXXX	ASVSC(1)DVSC(1)K	ASVSC(59.2)DVSC(59.2)K	9	2	-0.27373	By matching	By matching	By MS/MS	By matching
C4LTM9	120	C4LTM9	C4LTM9	>tr|C4LTM9|C4LTM9_ENTHI Rab family GTPase OS=Entamoeba histolytica OX=5759 GN=EHI_012380 PE=3 SV=1	1	62.7143	0.00562842	62.714	10.031	62.714	0	0		NaN					1	62.7143	0.00562842	62.714					0	0		NaN						1	C	QNQNPSFTTKLILVGCKSDLEGNRQITTTEA	X;X;X;X;X;X;X;X;X;X;X;X;X;X;X;Carbamidomethyl (C);X;X;X;X;X;X;X;X;X;X;X;X;X;X;X	XXXXXXXXXXPPPPPPPXXXXXXXXXXXXXX	LILVGC(1)K	LILVGC(62.71)K	6	2	0.45376	By matching	By matching	By MS/MS	By matching
C4LTP3	166	C4LTP3	C4LTP3	>tr|C4LTP3|C4LTP3_ENTHI Toxin resistance protein, putative OS=Entamoeba histolytica OX=5759 GN=EHI_012570 PE=4 SV=1	1	36.2403	0.0407878	36.24	13.599	36.24									1	36.2403	0.0407878	36.24															C	LFNIQPGEELPCKQICEILFNKFTGRINFSV	X;X;X;X;X;X;X;X;X;X;X;X;X;X;X;Carbamidomethyl (C);X;X;X;X;X;X;X;X;X;X;X;X;X;X;X	XXXXXXXXXXXXXPPPPPPPPPXXXXXXXXX	QIC(1)EILFNK	QIC(36.24)EILFNK	3	2	-4.3589	By matching	By matching	By matching	By matching
C4LTQ2;B1N4N2	31;31	C4LTQ2	C4LTQ2	>tr|C4LTQ2|C4LTQ2_ENTHI HEAT repeat domain containing protein OS=Entamoeba histolytica OX=5759 GN=EHI_050150 PE=4 SV=1;>tr|B1N4N2|B1N4N2_ENTHI Protein phosphatase, putative OS=Entamoeba histolytica OX=5759 GN=EHI_019610 PE=4 SV=1	1	53.5645	0.000734827	53.565	43.721	53.565																					1	53.5645	0.000734827	53.565		1	C	ELVNGEKFINDFDSFCNLEDANKRLPSIRKT	X;X;X;X;X;X;X;X;X;X;X;X;X;X;X;Carbamidomethyl (C);X;X;X;X;X;X;X;X;X;X;X;X;X;X;X	XXXXXXXPPPPPPPPPPPPPPPPXXXXXXXX	FINDFDSFC(1)NLEDANK	FINDFDSFC(53.56)NLEDANK	9	2	-1.7256	By matching	By matching	By matching	By matching
C4LTQ2;B1N4N3	671;213	C4LTQ2	C4LTQ2	>tr|C4LTQ2|C4LTQ2_ENTHI HEAT repeat domain containing protein OS=Entamoeba histolytica OX=5759 GN=EHI_050150 PE=4 SV=1;>tr|B1N4N3|B1N4N3_ENTHI Serine/threonine-protein phosphatase 2A 65 kDa regulatory subunit A, putative OS=Entamoeba histolytica OX=5759 GN	1	89.3005	2.75625e-05	89.301	73.36	89.301													1	70.0893	0.000205772	70.089					1	89.3005	2.75625e-05	89.301		1	C	LFKRKKTITPVVEDPCERIVSFEGFGRK___	X;X;X;X;X;X;X;X;X;X;X;X;X;X;X;Carbamidomethyl (C);X;X;X;X;X;X;X;X;X;X;X;X;X;X;X	XXXXXXPPPPPPPPPPPPXXXXXXXXXXXXX	TITPVVEDPC(1)ER	TITPVVEDPC(89.3)ER	10	2	-0.93872	By matching	By matching	By matching	By MS/MS
C4LTQ4	53	C4LTQ4	C4LTQ4	>tr|C4LTQ4|C4LTQ4_ENTHI UDP-N-acetylglucosamine transporter, putative OS=Entamoeba histolytica OX=5759 GN=EHI_050270 PE=4 SV=1	1	28.9178	0.0307775	28.918	11.36	28.918									0	0		NaN					1	28.9178	0.0307775	28.918						1	C	IPSTIVFNEILKFLICLVMLKFVHKKENLLQ	X;X;X;X;X;X;X;X;X;X;X;X;X;X;X;Carbamidomethyl (C);X;X;Oxidation (M);X;X;X;X;X;X;X;X;X;X;X;X	XXXXXXXXXXXXPPPPPPPPPXXXXXXXXXX	FLIC(1)LVMLK	FLIC(28.92)LVMLK	4	2	0.22433	By matching	By matching	By matching	By matching
C4LTQ5;C4M609	141;141	C4LTQ5;C4M609	C4LTQ5	>tr|C4LTQ5|C4LTQ5_ENTHI 40S ribosomal protein S3a OS=Entamoeba histolytica OX=5759 GN=EHI_050280 PE=2 SV=1;>tr|C4M609|C4M609_ENTHI 40S ribosomal protein S3a OS=Entamoeba histolytica OX=5759 GN=EHI_065270 PE=2 SV=1	1	80.706	0.000146843	82.645	42.377	80.706	1	72.2432	0.000586509	72.243	1	51.4453	0.00397565	51.445	1	80.706	0.000146843	80.706	1	81.9717	0.000287769	81.972	1	82.645	0.000267093	82.645	1	71.6136	0.000605844	71.614		1	C	SVDVKTTDGHLIRIFCIGFTSRKSNQIKKTS	X;X;X;X;X;X;X;X;X;X;X;X;X;X;X;Carbamidomethyl (C);X;X;X;X;X;X;X;X;X;X;X;X;X;X;X	XXXXXXXXXXXXXPPPPPPPPPPXXXXXXXX	IFC(1)IGFTSRK	IFC(80.71)IGFTSRK	3	3	-0.90268	By MS/MS	By MS/MS	By MS/MS	By MS/MS
C4LTR1	618	C4LTR1	C4LTR1	>tr|C4LTR1|C4LTR1_ENTHI Oxysterol binding protein, putative OS=Entamoeba histolytica OX=5759 GN=EHI_050360 PE=3 SV=1	1	46.3521	0.000984403	60.691	44.218	46.352	1	55.721	0.00494364	55.721	0	0		NaN	1	60.6907	0.000984403	60.691					1	46.3521	0.00532934	46.352	1	45.653	0.0096082	45.653		1	C	EDEYHIKPLLKEQNDCIGDGKQVKEELLTSS	X;X;X;X;X;X;X;X;X;X;X;X;X;X;X;Carbamidomethyl (C);X;X;X;X;X;X;X;X;X;X;X;X;X;X;X	XXXXXXXXXXXPPPPPPPPPPXXXXXXXXXX	EQNDC(1)IGDGK	EQNDC(46.35)IGDGK	5	2	0.71785	By matching	By matching	By MS/MS	By matching
C4LTS5	141	C4LTS5	C4LTS5	>tr|C4LTS5|C4LTS5_ENTHI Uncharacterized protein OS=Entamoeba histolytica OX=5759 GN=EHI_050520 PE=2 SV=1	1	100.04	4.80249e-101	286.07	254.16	100.04	1	121.377	4.80249e-101	286.07					1	101.412	3.42828e-13	114.15	1	50.7521	0.000277032	50.752	1	100.04	3.33194e-13	124.66	1	58.7117	8.88797e-05	58.712		1;2	C	CNFITPKCGDTQLRRCDLVYQQEIALNKYPT	Carbamidomethyl (C);X;X;X;X;X;X;Carbamidomethyl (C);X;X;X;X;X;X;X;Carbamidomethyl (C);X;X;X;X;X;X;X;X;X;X;X;X;X;X;X	XXXXXXXXXXXXXXPPPPPPPPPPPPPPPPP	RC(1)DLVYQQEIALNKYPTSDDIC(1)R	RC(100.04)DLVYQQEIALNKYPTSDDIC(100.04)R	2	3	0.38034	By MS/MS	By matching	By MS/MS	By MS/MS
C4LTS5	161	C4LTS5	C4LTS5	>tr|C4LTS5|C4LTS5_ENTHI Uncharacterized protein OS=Entamoeba histolytica OX=5759 GN=EHI_050520 PE=2 SV=1	1	51.2762	4.80249e-101	286.07	254.16	51.276	1	72.3251	4.80249e-101	286.07					1	51.2762	3.42828e-13	114.15	1	50.7521	0.000277032	50.752	1	100.04	3.33194e-13	124.66	1	58.7117	8.88797e-05	58.712		1;2	C	QQEIALNKYPTSDDICRALAKKVECYDSNHC	X;X;X;X;X;X;X;X;X;X;X;X;X;X;X;Carbamidomethyl (C);X;X;X;X;X;X;X;X;Carbamidomethyl (C);X;X;X;X;X;Carbamidomethyl (C)	PPPPPPPPPPPPPPPPPXXXXXXXXXXXXXX	YPTSDDIC(1)R	YPTSDDIC(51.28)R	8	2	-1.0031	By MS/MS	By matching	By MS/MS	By MS/MS
C4LTS5	133	C4LTS5	C4LTS5	>tr|C4LTS5|C4LTS5_ENTHI Uncharacterized protein OS=Entamoeba histolytica OX=5759 GN=EHI_050520 PE=2 SV=1	1	26.6929	0.00301137	79.116	39.013	26.693	1	53.9678	0.00391697	53.968	1	25.5591	0.0408226	25.559	1	44.3492	0.00991239	44.349	0	0		NaN	1	26.6929	0.00339545	75.189	1	79.116	0.00301137	79.116		1	C	CNTLGCKYCNFITPKCGDTQLRRCDLVYQQE	Carbamidomethyl (C);X;X;X;X;Carbamidomethyl (C);Propionamide_aa;X;X;Carbamidomethyl (C);X;X;X;X;X;X;Carbamidomethyl (C);X;X;X;X;X;X;X;Carbamidomethyl (C);X;X;X;X;X;X;X	XXXXXXXXXXXXXXXPPPPPPPPXXXXXXXX	C(1)GDTQLRR	C(26.69)GDTQLRR	1	3	-0.10135	By MS/MS	By MS/MS	By MS/MS	By matching
C4LTS5	106	C4LTS5	C4LTS5	>tr|C4LTS5|C4LTS5_ENTHI Uncharacterized protein OS=Entamoeba histolytica OX=5759 GN=EHI_050520 PE=2 SV=1	1	104.41	6.89992e-11	137.84	103.96	104.41	1	104.257	6.89992e-11	137.84	1	42.3169	0.00384531	42.317	1	90.7588	1.6228e-08	112.44	1	48.5322	0.00062799	58.116	1	104.41	1.25208e-07	104.41	1	35.7634	0.000278822	66.004		1	C	TCFEDFADRIMNSFSCGTEFLKSLDEVCNTL	X;X;X;X;X;X;X;X;X;X;Oxidation (M);X;X;X;X;Carbamidomethyl (C);X;X;X;X;X;X;X;X;X;X;X;Carbamidomethyl (C);X;X;X	XXXXXXXXXPPPPPPPPPPPPPXXXXXXXXX	IMNSFSC(1)GTEFLK	IMNSFSC(104.41)GTEFLK	7	2	-0.91039	By MS/MS	By MS/MS	By MS/MS	By MS/MS
C4LTS5	170	C4LTS5	C4LTS5	>tr|C4LTS5|C4LTS5_ENTHI Uncharacterized protein OS=Entamoeba histolytica OX=5759 GN=EHI_050520 PE=2 SV=1	1	69.7037	1.33692e-24	151.71	139.51	69.704	1	57.2157	1.33692e-24	151.71	0	0		NaN	1	44.1578	1.40902e-13	118.9					1	69.7037	4.18899e-18	133.17	0	0		NaN		2	C	PTSDDICRALAKKVECYDSNHCVYADIPQMQ	X;X;X;X;X;X;Carbamidomethyl (C);X;X;X;X;X;X;X;X;Carbamidomethyl (C);X;X;X;X;X;Carbamidomethyl (C);X;X;X;X;X;X;X;Oxidation (M);X	XXXXXXXXXXXXPPPPPPPPPPPPPPPPPPP	VEC(1)YDSNHC(1)VYADIPQMQQTVK	VEC(69.7)YDSNHC(69.7)VYADIPQMQQTVK	3	3	-0.44394	By MS/MS	By matching	By MS/MS	By matching
C4LTS5	176	C4LTS5	C4LTS5	>tr|C4LTS5|C4LTS5_ENTHI Uncharacterized protein OS=Entamoeba histolytica OX=5759 GN=EHI_050520 PE=2 SV=1	1	69.7037	1.33692e-24	151.71	139.51	69.704	1	57.2157	1.33692e-24	151.71	0	0		NaN	1	44.1578	1.40902e-13	118.9					1	69.7037	4.18899e-18	133.17	0	0		NaN		2	C	CRALAKKVECYDSNHCVYADIPQMQQTVKQC	Carbamidomethyl (C);X;X;X;X;X;X;X;X;Carbamidomethyl (C);X;X;X;X;X;Carbamidomethyl (C);X;X;X;X;X;X;X;Oxidation (M);X;X;X;X;X;X;X	XXXXXXPPPPPPPPPPPPPPPPPPPPPPPXX	VEC(1)YDSNHC(1)VYADIPQMQQTVK	VEC(69.7)YDSNHC(69.7)VYADIPQMQQTVK	9	3	-0.44394	By MS/MS	By matching	By MS/MS	By matching
C4LTS5	196	C4LTS5	C4LTS5	>tr|C4LTS5|C4LTS5_ENTHI Uncharacterized protein OS=Entamoeba histolytica OX=5759 GN=EHI_050520 PE=2 SV=1	1	75.7881	5.84033e-05	80.245	71.05	75.788	1	55.2612	0.000768317	55.261	1	53.5574	0.00103161	53.557	1	80.2447	5.84033e-05	80.245	1	41.4799	0.00404587	41.48	1	75.7881	9.29782e-05	75.788	1	64.1212	0.00037479	64.121		3	C	IPQMQQTVKQCRNSTCPACYQICKNGAISTF	X;X;X;Oxidation (M);X;X;X;X;X;X;X;X;X;X;X;Carbamidomethyl (C);X;X;Carbamidomethyl (C);X;X;X;Carbamidomethyl (C);X;X;X;X;X;X;X;X	XXXXXXXXXXXXPPPPPPPPPPPPXXXXXXX	NSTC(1)PAC(1)YQIC(1)K	NSTC(75.79)PAC(75.79)YQIC(75.79)K	4	2	-0.86426	By MS/MS	By MS/MS	By MS/MS	By MS/MS
C4LTS5	199	C4LTS5	C4LTS5	>tr|C4LTS5|C4LTS5_ENTHI Uncharacterized protein OS=Entamoeba histolytica OX=5759 GN=EHI_050520 PE=2 SV=1	1	75.7881	5.84033e-05	80.245	71.05	75.788	1	55.2612	0.000768317	55.261	1	53.5574	0.00103161	53.557	1	80.2447	5.84033e-05	80.245	1	41.4799	0.00404587	41.48	1	75.7881	9.29782e-05	75.788	1	64.1212	0.00037479	64.121		3	C	MQQTVKQCRNSTCPACYQICKNGAISTFALF	Oxidation (M);X;X;X;X;X;X;X;X;X;X;X;Carbamidomethyl (C);X;X;Carbamidomethyl (C);X;X;X;Carbamidomethyl (C);X;X;X;X;X;X;X;X;X;X;X	XXXXXXXXXPPPPPPPPPPPPXXXXXXXXXX	NSTC(1)PAC(1)YQIC(1)K	NSTC(75.79)PAC(75.79)YQIC(75.79)K	7	2	-0.86426	By MS/MS	By MS/MS	By MS/MS	By MS/MS
C4LTS5	203	C4LTS5	C4LTS5	>tr|C4LTS5|C4LTS5_ENTHI Uncharacterized protein OS=Entamoeba histolytica OX=5759 GN=EHI_050520 PE=2 SV=1	1	75.7881	5.84033e-05	80.245	71.05	75.788	1	55.2612	0.000768317	55.261	1	53.5574	0.00103161	53.557	1	80.2447	5.84033e-05	80.245	1	41.4799	0.00404587	41.48	1	75.7881	9.29782e-05	75.788	1	64.1212	0.00037479	64.121		3	C	VKQCRNSTCPACYQICKNGAISTFALFALVL	X;X;X;X;X;X;X;X;Carbamidomethyl (C);X;X;Carbamidomethyl (C);X;X;X;Carbamidomethyl (C);X;X;X;X;X;X;X;X;X;X;X;X;X;X;X	XXXXXPPPPPPPPPPPPXXXXXXXXXXXXXX	NSTC(1)PAC(1)YQIC(1)K	NSTC(75.79)PAC(75.79)YQIC(75.79)K	11	2	-0.86426	By MS/MS	By MS/MS	By MS/MS	By MS/MS
C4LTS5	118	C4LTS5	C4LTS5	>tr|C4LTS5|C4LTS5_ENTHI Uncharacterized protein OS=Entamoeba histolytica OX=5759 GN=EHI_050520 PE=2 SV=1	1	119.386	3.39923e-08	151.98	131.75	119.39	1	43.3373	1.82559e-07	151.98	1	88.0206	2.45192e-05	88.021	1	130.563	1.25283e-07	130.56	0	0		NaN	1	119.386	3.39923e-08	119.39	1	98.1049	2.75652e-06	98.105		1;2	C	SFSCGTEFLKSLDEVCNTLGCKYCNFITPKC	X;X;X;Carbamidomethyl (C);X;X;X;X;X;X;X;X;X;X;X;Carbamidomethyl (C);X;X;X;X;Carbamidomethyl (C);Propionamide_aa;X;X;Carbamidomethyl (C);X;X;X;X;X;X;Carbamidomethyl (C)	XXXXXXXXXXPPPPPPPPPPPPXXXXXXXXX	SLDEVC(1)NTLGC(1)K	SLDEVC(119.39)NTLGC(119.39)K	6	2	-1.0397	By MS/MS	By MS/MS	By MS/MS	By matching
C4LTS5	123	C4LTS5	C4LTS5	>tr|C4LTS5|C4LTS5_ENTHI Uncharacterized protein OS=Entamoeba histolytica OX=5759 GN=EHI_050520 PE=2 SV=1	1	119.386	3.39923e-08	151.98	131.75	119.39	1	43.3373	1.82559e-07	151.98	1	88.0206	2.45192e-05	88.021	1	130.563	1.25283e-07	130.56	0	0		NaN	1	119.386	3.39923e-08	119.39	1	98.1049	2.75652e-06	98.105		2	C	TEFLKSLDEVCNTLGCKYCNFITPKCGDTQL	X;X;X;X;X;X;X;X;X;X;Carbamidomethyl (C);X;X;X;X;Carbamidomethyl (C);X;X;Carbamidomethyl (C);X;X;X;X;X;X;Carbamidomethyl (C);X;X;X;X;X	XXXXXPPPPPPPPPPPPXXXXXXXXXXXXXX	SLDEVC(1)NTLGC(1)K	SLDEVC(119.39)NTLGC(119.39)K	11	2	-1.0397	By MS/MS	By MS/MS	By MS/MS	By matching
C4LTS5	126	C4LTS5	C4LTS5	>tr|C4LTS5|C4LTS5_ENTHI Uncharacterized protein OS=Entamoeba histolytica OX=5759 GN=EHI_050520 PE=2 SV=1	1	66.2702	0.000788631	99.442	85.863	66.27	1	99.4417	0.000788631	99.442	1	76.6789	0.00154505	76.679	1	70.2558	0.00190886	70.256	1	56.4315	0.00428466	56.432	1	66.2702	0.00251337	66.27	1	93.1432	0.000927855	93.143		1	C	LKSLDEVCNTLGCKYCNFITPKCGDTQLRRC	X;X;X;X;X;X;X;Carbamidomethyl (C);X;X;X;X;Carbamidomethyl (C);Propionamide_aa;X;X;Carbamidomethyl (C);X;X;X;X;X;X;Carbamidomethyl (C);X;X;X;X;X;X;X;Carbamidomethyl (C)	XXXXXXXXXXXXXXPPPPPPPPXXXXXXXXX	YC(1)NFITPK	YC(66.27)NFITPK	2	2	0.50648	By MS/MS	By MS/MS	By MS/MS	By MS/MS
C4LU92;C4LTS8;C4M6P6	158;158;159	C4LU92;C4M6P6	C4LU92	>tr|C4LU92|C4LU92_ENTHI Guanine nucleotide-binding protein subunit beta 2-like 1, putative OS=Entamoeba histolytica OX=5759 GN=EHI_110400 PE=4 SV=1;>tr|C4LTS8|C4LTS8_ENTHI Guanine nucleotide-binding protein subunit beta 2-like 1, putative OS=Entamoeba hist	1	108.685	2.97404e-07	108.68	90.626	108.68	1	92.7811	1.8047e-05	92.781	0	0		NaN	1	108.685	2.97404e-07	108.68	0	0		NaN	0	0		NaN	1	76.3258	0.00011496	76.326		1	C	CVASVKTDSHSEWVSCVRFVPNAKGNKFVSA	X;X;X;X;X;X;X;X;X;X;X;X;X;X;X;Carbamidomethyl (C);X;X;X;X;X;X;X;X;X;X;X;X;X;X;X	XXXXXXPPPPPPPPPPPPXXXXXXXXXXXXX	TDSHSEWVSC(1)VR	TDSHSEWVSC(108.68)VR	10	2	-1.1122	By MS/MS	By matching	By MS/MS	By matching
C4LU92;C4LTS8;C4M6P6	188;188;189	C4LU92;C4M6P6	C4LU92	>tr|C4LU92|C4LU92_ENTHI Guanine nucleotide-binding protein subunit beta 2-like 1, putative OS=Entamoeba histolytica OX=5759 GN=EHI_110400 PE=4 SV=1;>tr|C4LTS8|C4LTS8_ENTHI Guanine nucleotide-binding protein subunit beta 2-like 1, putative OS=Entamoeba hist	1	33.7233	0.00242405	54.066	35.261	33.723	1	54.066	0.00242405	54.066	1	43.7698	0.00851991	43.77	1	33.7233	0.0478335	33.723	1	44.425	0.008132	44.425					1	51.4453	0.00397565	51.445		1	C	AGWDNQIKTWTLDQSCKLESTITHHTGFINT;AGWDNQVKTWTLDQSCKLESTITHHTGFINT	X;X;X;X;X;X;X;X;X;X;X;X;X;X;X;Carbamidomethyl (C);X;X;X;X;X;X;X;X;X;X;X;X;X;X;X	XXXXXXXXPPPPPPPPPXXXXXXXXXXXXXX	TWTLDQSC(1)K	TWTLDQSC(33.72)K	8	2	-0.72144	By MS/MS	By MS/MS	By matching	By MS/MS
C4LTT0	295	C4LTT0	C4LTT0	>tr|C4LTT0|C4LTT0_ENTHI Cysteine proteinase, putative OS=Entamoeba histolytica OX=5759 GN=EHI_050570 PE=2 SV=1	1	30.2885	1.74303e-15	128.83	113.03	30.288	1	128.827	1.74303e-15	128.83	0	0		NaN	1	30.2885	0.000245437	52					1	23.1954	0.0182021	23.195						1	C	GDKGYILMSRNKNNQCAIASVAYFPTGAHDA	X;X;X;X;X;X;X;X;X;X;X;X;X;X;X;Carbamidomethyl (C);X;X;X;X;X;X;X;X;X;X;X;X;X;X;X	XXXXXXXXXXPPPPPPPPPPPPPPPPPPPPP	NNQC(1)AIASVAYFPTGAHDAN	NNQC(30.29)AIASVAYFPTGAHDAN	4	2	2.482	By MS/MS	By matching	By MS/MS	By matching
C4LTT0	115	C4LTT0	C4LTT0	>tr|C4LTT0|C4LTT0_ENTHI Cysteine proteinase, putative OS=Entamoeba histolytica OX=5759 GN=EHI_050570 PE=2 SV=1	1	76.294	3.41312e-07	76.294	72.674	76.294	1	76.294	3.41312e-07	76.294													0	0		NaN						2	C	WRAEGKVTPVRDQGNCGSCYSFSSLAVLESR	X;X;X;X;X;X;X;X;X;X;X;X;X;X;X;Carbamidomethyl (C);X;X;Carbamidomethyl (C);X;X;X;X;X;X;X;X;X;X;X;X	XXXXXXPPPPPPPPPPPPPPPPPPPPPPPPP	VTPVRDQGNC(1)GSC(1)YSFSSLAVLESR	VTPVRDQGNC(76.29)GSC(76.29)YSFSSLAVLESR	10	3	-1.1068	By MS/MS	By matching	By matching	By matching
C4LTT0	118	C4LTT0	C4LTT0	>tr|C4LTT0|C4LTT0_ENTHI Cysteine proteinase, putative OS=Entamoeba histolytica OX=5759 GN=EHI_050570 PE=2 SV=1	1	76.294	3.41312e-07	76.294	72.674	76.294	1	76.294	3.41312e-07	76.294													0	0		NaN						2	C	EGKVTPVRDQGNCGSCYSFSSLAVLESRLLI	X;X;X;X;X;X;X;X;X;X;X;X;Carbamidomethyl (C);X;X;Carbamidomethyl (C);X;X;X;X;X;X;X;X;X;X;X;X;X;X;X	XXXPPPPPPPPPPPPPPPPPPPPPPPPPXXX	VTPVRDQGNC(1)GSC(1)YSFSSLAVLESR	VTPVRDQGNC(76.29)GSC(76.29)YSFSSLAVLESR	13	3	-1.1068	By MS/MS	By matching	By matching	By matching
C4LTT5	795	C4LTT5	C4LTT5	>tr|C4LTT5|C4LTT5_ENTHI Protein kinase, putative OS=Entamoeba histolytica OX=5759 GN=EHI_050650 PE=4 SV=1	1	54.066	0.00125568	54.066	21.746	54.066	0	0		NaN					1	54.066	0.00125568	54.066														2	C	QCVQCSIGHYLKSNKCNICSELDSKCISCNP	X;X;X;X;X;X;X;X;X;X;X;X;X;X;X;Carbamidomethyl (C);X;X;Carbamidomethyl (C);X;X;X;X;X;X;X;X;X;X;X;X	XXXXXXXXXXXXXXXPPPPPPPPPPXXXXXX	C(1)NIC(1)SELDSK	C(54.07)NIC(54.07)SELDSK	1	2	-3.2255	By matching	By matching	By MS/MS	By matching
C4LTT5	798	C4LTT5	C4LTT5	>tr|C4LTT5|C4LTT5_ENTHI Protein kinase, putative OS=Entamoeba histolytica OX=5759 GN=EHI_050650 PE=4 SV=1	1	54.066	0.00125568	54.066	21.746	54.066	0	0		NaN					1	54.066	0.00125568	54.066														2	C	QCSIGHYLKSNKCNICSELDSKCISCNPSAE	X;X;X;X;X;X;X;X;X;X;X;X;Carbamidomethyl (C);X;X;Carbamidomethyl (C);X;X;X;X;X;X;X;X;X;X;X;X;X;X;X	XXXXXXXXXXXXPPPPPPPPPPXXXXXXXXX	C(1)NIC(1)SELDSK	C(54.07)NIC(54.07)SELDSK	4	2	-3.2255	By matching	By matching	By MS/MS	By matching
C4LTT5	846	C4LTT5	C4LTT5	>tr|C4LTT5|C4LTT5_ENTHI Protein kinase, putative OS=Entamoeba histolytica OX=5759 GN=EHI_050650 PE=4 SV=1	1	71.1757	0.000152452	71.176	49.803	71.176																					1	71.1757	0.000152452	71.176		2	C	CVPCKEGEVKISEIQCIPCSSKIEGCSSCIF	X;X;X;X;X;X;X;X;X;X;X;X;X;X;X;Carbamidomethyl (C);X;X;Carbamidomethyl (C);X;X;X;X;X;X;X;X;X;X;X;X	XXXXXXXXXXPPPPPPPPPPPPXXXXXXXXX	ISEIQC(1)IPC(1)SSK	ISEIQC(71.18)IPC(71.18)SSK	6	2	-1.8873	By matching	By matching	By matching	By matching
C4LTT5	849	C4LTT5	C4LTT5	>tr|C4LTT5|C4LTT5_ENTHI Protein kinase, putative OS=Entamoeba histolytica OX=5759 GN=EHI_050650 PE=4 SV=1	1	71.1757	0.000152452	71.176	49.803	71.176																					1	71.1757	0.000152452	71.176		2	C	CKEGEVKISEIQCIPCSSKIEGCSSCIFNSI	X;X;X;X;X;X;X;X;X;X;X;X;Carbamidomethyl (C);X;X;Carbamidomethyl (C);X;X;X;X;X;X;X;X;X;X;X;X;X;X;X	XXXXXXXPPPPPPPPPPPPXXXXXXXXXXXX	ISEIQC(1)IPC(1)SSK	ISEIQC(71.18)IPC(71.18)SSK	9	2	-1.8873	By matching	By matching	By matching	By matching
C4LTU2	217	C4LTU2	C4LTU2	>tr|C4LTU2|C4LTU2_ENTHI Paxillin, putative OS=Entamoeba histolytica OX=5759 GN=EHI_050720 PE=4 SV=1	0.994212	22.3495	0.000494174	61.127	49.868	61.127	0.994212	22.3495	0.000494174	61.127																						1	C	ACGRKWHADHFRCAECHNPLYETTARSYLDK	X;Carbamidomethyl (C);NEM H2O;X;X;X;X;X;X;X;X;X;X;NEM;X;X;Carbamidomethyl (C);X;X;X;X;X;X;X;X;X;X;X;X;X;X;X	XXXXXXXXXXXXPPPPPPPPPPPPPPXXXXX	C(0.006)AEC(0.994)HNPLYETTAR	C(-22.35)AEC(22.35)HNPLYETTAR	4	2	-0.24211	By MS/MS	By matching	By matching	By matching
C4LTU2	35	C4LTU2	C4LTU2	>tr|C4LTU2|C4LTU2_ENTHI Paxillin, putative OS=Entamoeba histolytica OX=5759 GN=EHI_050720 PE=4 SV=1	1	149.298	2.8257e-16	150.05	122.38	149.3	1	139.582	8.28154e-16	139.58					1	150.051	2.8257e-16	150.05					1	149.298	3.01172e-16	149.3	0	0		NaN		1	C	ACGKTYHPSHFTCKGCGELLNNSEYQEIRKQ	X;X;X;X;X;X;X;X;X;X;X;X;X;X;X;Carbamidomethyl (C);X;X;X;X;X;X;X;X;X;X;X;X;X;X;X	XXXXXXXXXXXXXXPPPPPPPPPPPPPPPXX	GC(1)GELLNNSEYQEIR	GC(149.3)GELLNNSEYQEIR	2	2	-0.77468	By MS/MS	By matching	By MS/MS	By matching
C4LTU2	203	C4LTU2	C4LTU2	>tr|C4LTU2|C4LTU2_ENTHI Paxillin, putative OS=Entamoeba histolytica OX=5759 GN=EHI_050720 PE=4 SV=1	1	96.6264	1.44993e-05	96.626	61.474	96.626	0	0		NaN					1	49.4481	0.00360501	49.448	0	0		NaN	1	96.6264	1.44993e-05	96.626	1	44.5427	0.00576498	44.543		1	C	CGEMIDRTDSNSIIACGRKWHADHFRCAECH	X;X;X;X;X;X;X;X;X;X;X;X;X;X;X;Carbamidomethyl (C);X;X;X;X;X;X;X;X;X;X;NEM;X;X;Carbamidomethyl (C);X	XXXXXXXPPPPPPPPPPPXXXXXXXXXXXXX	TDSNSIIAC(1)GR	TDSNSIIAC(96.63)GR	9	2	0.034339	By matching	By matching	By MS/MS	By matching
C4LTU6	153	C4LTU6	C4LTU6	>tr|C4LTU6|C4LTU6_ENTHI MutT/nudix family protein OS=Entamoeba histolytica OX=5759 GN=EHI_050760 PE=4 SV=1	1	43.7698	0.00658085	43.77	34.02	43.77									0	0		NaN					0	0		NaN	1	43.7698	0.00658085	43.77		1	C	DCGSCKNMVFPRTDPCIIVVVRHPTEKKCLF	X;X;X;X;X;X;X;X;X;X;X;X;X;X;X;Carbamidomethyl (C);X;X;X;X;X;X;X;X;X;X;X;X;X;X;X	XXXXXXXXXXXXPPPPPPPPPPXXXXXXXXX	TDPC(1)IIVVVR	TDPC(43.77)IIVVVR	4	2	0.28099	By matching	By matching	By matching	By matching
C4LTV0	420	C4LTV0	C4LTV0	>tr|C4LTV0|C4LTV0_ENTHI Uncharacterized protein OS=Entamoeba histolytica OX=5759 GN=EHI_050800 PE=4 SV=1	1	50.3923	1.42811e-15	133.25	129.33	50.392	1	133.249	1.42811e-15	133.25					1	50.3923	3.18677e-05	84.508					1	131.556	1.5885e-15	131.56						1	C	TETTKLRANDYGYEPCGNDEGRSYYYALEMT	X;X;X;X;X;X;X;X;X;X;X;X;X;X;X;Carbamidomethyl (C);X;X;X;X;X;X;X;X;X;X;X;X;X;X;X	XXXXXPPPPPPPPPPPPPPPPPXXXXXXXXX	LRANDYGYEPC(1)GNDEGR	LRANDYGYEPC(50.39)GNDEGR	11	3	-0.13002	By MS/MS	By matching	By MS/MS	By matching
C4LTV0	187	C4LTV0	C4LTV0	>tr|C4LTV0|C4LTV0_ENTHI Uncharacterized protein OS=Entamoeba histolytica OX=5759 GN=EHI_050800 PE=4 SV=1	1	61.0151	6.12722e-32	202.94	177.12	61.015	1	104.999	6.12722e-32	202.94	0	0		NaN	1	61.0151	0.000285723	61.015					0	0		NaN						1	C	YFRKYNSEFFYPNEVCPYTVRRGKGDWECDG	X;X;X;X;X;X;X;X;X;X;X;X;X;X;X;Carbamidomethyl (C);X;X;X;X;X;X;X;X;X;X;X;X;X;X;X	XXXPPPPPPPPPPPPPPPPPPXXXXXXXXXX	YNSEFFYPNEVC(1)PYTVR	YNSEFFYPNEVC(61.02)PYTVR	12	2	-2.1317	By MS/MS	By matching	By MS/MS	By matching
C4LTV0	398	C4LTV0	C4LTV0	>tr|C4LTV0|C4LTV0_ENTHI Uncharacterized protein OS=Entamoeba histolytica OX=5759 GN=EHI_050800 PE=4 SV=1	1	79.3824	8.89057e-18	121.94	96.757	79.382	1	121.943	8.89057e-18	121.94					1	120.27	1.10564e-17	120.27					1	79.3824	7.37294e-08	79.382						1	C	RTFVGIANHGATVLVCAGANSITETTKLRAN	X;X;X;X;X;X;X;X;X;X;X;X;X;X;X;Carbamidomethyl (C);X;X;X;X;X;X;X;X;X;X;X;X;X;X;X	XPPPPPPPPPPPPPPPPPPPPPPPPPPXXXX	TFVGIANHGATVLVC(1)AGANSITETTK	TFVGIANHGATVLVC(79.38)AGANSITETTK	15	3	1.0229	By MS/MS	By matching	By MS/MS	By matching
C4LTV0	378	C4LTV0	C4LTV0	>tr|C4LTV0|C4LTV0_ENTHI Uncharacterized protein OS=Entamoeba histolytica OX=5759 GN=EHI_050800 PE=4 SV=1	1	140.824	3.75773e-11	155.43	137.84	140.82	1	124.515	3.80814e-11	124.51					1	155.433	3.75773e-11	155.43					1	140.824	1.06076e-10	140.82						1	C	PMNYECFKTNQDSEMCPNITRTFVGIANHGA	X;X;X;X;X;X;X;X;X;X;X;X;X;X;Oxidation (M);Carbamidomethyl (C);X;X;X;X;X;X;X;X;X;X;X;X;X;X;X	XXXXXXXXPPPPPPPPPPPPPXXXXXXXXXX	TNQDSEMC(1)PNITR	TNQDSEMC(140.82)PNITR	8	2	-0.090185	By MS/MS	By matching	By MS/MS	By matching
C4LTV0	256	C4LTV0	C4LTV0	>tr|C4LTV0|C4LTV0_ENTHI Uncharacterized protein OS=Entamoeba histolytica OX=5759 GN=EHI_050800 PE=4 SV=1	1	51.4359	0.00372278	51.872	43.109	51.436	1	44.57	0.00804618	44.57					1	51.8724	0.00372278	51.872					1	51.4359	0.00398119	51.436						1	C	VGWGHATLGRTYLYPCDSKSPFINNEDCMLH	X;X;X;X;X;X;X;X;X;X;X;X;X;X;X;Carbamidomethyl (C);X;X;X;X;X;X;X;X;X;X;X;X;X;X;X	XXXXXXXXXXPPPPPPPPPXXXXXXXXXXXX	TYLYPC(1)DSK	TYLYPC(51.44)DSK	6	2	0.51845	By MS/MS	By matching	By MS/MS	By matching
C4LUB2;C4LTV2	858;884	C4LUB2	C4LUB2	>tr|C4LUB2|C4LUB2_ENTHI Tyrosine kinase, putative OS=Entamoeba histolytica OX=5759 GN=EHI_110650 PE=4 SV=1;>tr|C4LTV2|C4LTV2_ENTHI Tyrosine kinase, putative OS=Entamoeba histolytica OX=5759 GN=EHI_050820 PE=4 SV=1	1	40.5726	0.021048	40.573	13.708	40.573	0	0		NaN					1	40.5726	0.021048	40.573					0	0		NaN						1	C	QCLQCKDGYKLSDGQCKEETASDCLLYYNNK	X;X;X;X;X;X;X;X;X;X;X;X;X;X;X;Carbamidomethyl (C);X;X;X;X;X;X;X;X;X;X;X;X;X;X;X	XXXXXXXXXXPPPPPPPXXXXXXXXXXXXXX	LSDGQC(1)K	LSDGQC(40.57)K	6	2	1.3567	By matching	By matching	By MS/MS	By matching
C4LTV9	275	C4LTV9	C4LTV9	>tr|C4LTV9|C4LTV9_ENTHI Uncharacterized protein OS=Entamoeba histolytica OX=5759 GN=EHI_050890 PE=2 SV=1	1	132.47	3.23863e-07	153.15	129.19	132.47	1	132.47	4.96126e-05	132.47					1	153.15	3.23863e-07	153.15					1	108.008	5.54583e-07	108.01						1	C	YNNLLQVKKSEWIDKCQEQKFIMENGCEIMY	X;X;X;X;X;X;X;X;X;X;X;X;X;X;X;Carbamidomethyl (C);X;X;X;X;X;X;X;X;X;X;X;X;X;X;X	XXXXXXXXPPPPPPPPPPPPXXXXXXXXXXX	SEWIDKC(1)QEQK	SEWIDKC(132.47)QEQK	7	2	-0.36589	By MS/MS	By matching	By MS/MS	By matching
C4LTV9	209	C4LTV9	C4LTV9	>tr|C4LTV9|C4LTV9_ENTHI Uncharacterized protein OS=Entamoeba histolytica OX=5759 GN=EHI_050890 PE=2 SV=1	1	117.529	1.82096e-10	117.53	89.168	117.53	1	117.529	1.82096e-10	117.53					0	0		NaN														1	C	LDDIQYYDRNMIGSHCTSPVYYIKGLVEQYT	X;X;X;X;X;X;X;X;X;X;X;X;X;X;X;Carbamidomethyl (C);X;X;X;X;X;X;X;X;X;X;X;X;X;X;X	XXXXXXXXXPPPPPPPPPPPPPPPXXXXXXX	NMIGSHC(1)TSPVYYIK	NMIGSHC(117.53)TSPVYYIK	7	2	0.60024	By MS/MS	By matching	By matching	By matching
C4LTW4	458	C4LTW4	C4LTW4	>tr|C4LTW4|C4LTW4_ENTHI Phosphoglycerate mutase (2,3-diphosphoglycerate-independent) OS=Entamoeba histolytica OX=5759 GN=EHI_050940 PE=2 SV=1	1	62.4662	0.000515568	65.719	38.416	62.466	1	37.5999	0.0106333	37.6	1	51.2862	0.00188793	51.286	1	25.9643	0.00114039	58.699	1	60.2551	0.000515568	65.719	1	50.4517	0.00129493	56.404	1	62.4662	0.000540858	62.466		1;2	C	GHTGNIQSGVKAVLTCDECLKRLDEEVRKQK	X;X;X;X;X;X;X;X;X;X;X;X;X;X;X;Carbamidomethyl (C);X;X;Carbamidomethyl (C);NEM;X;X;X;X;X;X;X;X;X;X;X;X	XXXXXXXXXXXPPPPPPPPPPPXXXXXXXXX	AVLTC(1)DEC(1)LKR	AVLTC(62.47)DEC(62.47)LKR	5	3	-0.32944	By MS/MS	By MS/MS	By MS/MS	By MS/MS
C4LTW4	461	C4LTW4	C4LTW4	>tr|C4LTW4|C4LTW4_ENTHI Phosphoglycerate mutase (2,3-diphosphoglycerate-independent) OS=Entamoeba histolytica OX=5759 GN=EHI_050940 PE=2 SV=1	1	62.4662	0.000515568	65.719	38.416	62.466	1	37.5999	0.0106333	37.6	1	51.2862	0.00188793	51.286	1	25.9643	0.0329565	25.964	1	60.2551	0.000515568	65.719	1	50.4517	0.00263841	50.452	1	62.4662	0.000540858	62.466		2	C	GNIQSGVKAVLTCDECLKRLDEEVRKQKGIL	X;X;X;X;X;X;X;X;X;X;X;X;Carbamidomethyl (C);X;X;Carbamidomethyl (C);X;X;X;X;X;X;X;X;X;X;X;X;X;X;X	XXXXXXXXPPPPPPPPPPPXXXXXXXXXXXX	AVLTC(1)DEC(1)LKR	AVLTC(62.47)DEC(62.47)LKR	8	3	-0.32944	By MS/MS	By MS/MS	By MS/MS	By MS/MS
C4LTW4	417	C4LTW4	C4LTW4	>tr|C4LTW4|C4LTW4_ENTHI Phosphoglycerate mutase (2,3-diphosphoglycerate-independent) OS=Entamoeba histolytica OX=5759 GN=EHI_050940 PE=2 SV=1	1	69.3144	3.17384e-05	81.789	59.877	69.314	1	81.7894	3.17384e-05	81.789					1	74.1329	9.49331e-05	74.133					1	69.3144	0.00013564	69.314						1	C	NDLTESHPEMKAKEVCDRLIEVLESKEYKYL	X;X;X;X;X;X;X;X;X;X;X;X;X;X;X;Carbamidomethyl (C);NEM;X;X;X;X;X;X;X;X;X;X;X;X;X;X;X	XXXXXXXXXXXXXPPPPPPPPPPPPPXXXXX	EVC(1)DRLIEVLESK	EVC(69.31)DRLIEVLESK	3	3	0.60947	By MS/MS	By matching	By MS/MS	By matching
C4LTW4;B1N573	20;20	C4LTW4	C4LTW4	>tr|C4LTW4|C4LTW4_ENTHI Phosphoglycerate mutase (2,3-diphosphoglycerate-independent) OS=Entamoeba histolytica OX=5759 GN=EHI_050940 PE=2 SV=1;>tr|B1N573|B1N573_ENTHI Phosphoglycerate mutase (2,3-diphosphoglycerate-independent) OS=Entamoeba histolytica OX=5	1	31.8832	0.0270355	31.883	16.338	31.883													1	31.8832	0.0270355	31.883											C	KPNTKLQPRQGPVVVCILDGFGIDKEGPGNC	X;X;X;X;X;X;X;X;X;X;X;X;X;X;X;Carbamidomethyl (C);X;X;X;X;X;X;X;X;X;X;X;X;X;X;X	XXXXXXXXXPPPPPPPPPPPPPPPPXXXXXX	QGPVVVC(1)ILDGFGIDK	QGPVVVC(31.88)ILDGFGIDK	7	2	-2.1536	By matching	By matching	By matching	By matching
C4LTW4	343	C4LTW4	C4LTW4	>tr|C4LTW4|C4LTW4_ENTHI Phosphoglycerate mutase (2,3-diphosphoglycerate-independent) OS=Entamoeba histolytica OX=5759 GN=EHI_050940 PE=2 SV=1	1	50.4323	0.000222924	50.432	45.432	50.432	1	43.6963	0.000537736	43.696					1	50.4323	0.000222924	50.432														1	C	LLEYDSDNHVPPQYLCAPPDIKGVSSEYLVK	X;X;X;X;X;X;X;X;X;X;X;X;X;X;X;Carbamidomethyl (C);X;X;X;X;X;X;X;X;X;X;X;X;X;X;X	PPPPPPPPPPPPPPPPPPPPPPXXXXXXXXX	YAGLLEYDSDNHVPPQYLC(1)APPDIK	YAGLLEYDSDNHVPPQYLC(50.43)APPDIK	19	3	2.0314	By MS/MS	By matching	By MS/MS	By matching
C4LTW7	83	C4LTW7	C4LTW7	>tr|C4LTW7|C4LTW7_ENTHI CXXC-rich protein OS=Entamoeba histolytica OX=5759 GN=EHI_050970 PE=4 SV=1	1	55.2612	0.000689834	61.48	53.081	55.261	0	0		NaN					1	61.4803	0.000689834	61.48					1	55.2612	0.00105339	55.261						2	C	EICNEGYQWDNTTKSCVEGNDNCTRYSTDDG	X;X;X;X;X;X;X;X;X;X;X;X;X;X;X;Carbamidomethyl (C);X;X;X;X;X;X;Carbamidomethyl (C);X;X;X;X;X;X;X;X	XXXXXXXXXXXXXXPPPPPPPPPPPXXXXXX	SC(1)VEGNDNC(1)TR	SC(55.26)VEGNDNC(55.26)TR	2	2	-0.37089	By matching	By matching	By MS/MS	By matching
C4LTW7	90	C4LTW7	C4LTW7	>tr|C4LTW7|C4LTW7_ENTHI CXXC-rich protein OS=Entamoeba histolytica OX=5759 GN=EHI_050970 PE=4 SV=1	1	55.2612	0.000689834	61.48	53.081	55.261	0	0		NaN					1	61.4803	0.000689834	61.48					1	55.2612	0.00105339	55.261						2	C	QWDNTTKSCVEGNDNCTRYSTDDGSCSTCND	X;X;X;X;X;X;X;X;Carbamidomethyl (C);X;X;X;X;X;X;Carbamidomethyl (C);X;X;X;X;X;X;X;X;X;X;X;X;X;X;X	XXXXXXXPPPPPPPPPPPXXXXXXXXXXXXX	SC(1)VEGNDNC(1)TR	SC(55.26)VEGNDNC(55.26)TR	9	2	-0.37089	By matching	By matching	By MS/MS	By matching
C4LTW8	210	C4LTW8	C4LTW8	>tr|C4LTW8|C4LTW8_ENTHI Uncharacterized protein OS=Entamoeba histolytica OX=5759 GN=EHI_050980 PE=4 SV=1	1	54.2593	0.00514144	54.259	39.477	54.259									1	38.8746	0.0103726	38.875	0	0		NaN	1	54.2593	0.00514144	54.259						1	C	SKYTNAVGVGKYTYKCQVIAEDAQKFLEGKK	X;X;X;X;X;X;X;X;X;X;X;X;X;X;X;Carbamidomethyl (C);X;X;X;X;X;X;X;X;X;X;X;X;X;X;X	XXXXXXXXXXXXXXXPPPPPPPPPPXXXXXX	C(1)QVIAEDAQK	C(54.26)QVIAEDAQK	1	2	1.0313	By matching	By matching	By MS/MS	By matching
C4LTW8	256	C4LTW8	C4LTW8	>tr|C4LTW8|C4LTW8_ENTHI Uncharacterized protein OS=Entamoeba histolytica OX=5759 GN=EHI_050980 PE=4 SV=1	1	65.0429	1.22388e-05	80.96	62.886	65.043					0	0		NaN	1	80.9595	1.22388e-05	80.96					1	65.0429	0.000393083	65.043						1	C	EKCLTQELEIKIASACDVSVQNMKQVYKLML	X;X;X;X;X;X;X;X;X;X;X;X;X;X;X;Carbamidomethyl (C);X;X;X;X;X;X;X;X;X;X;X;X;X;X;X	XXXXXXXXXXXPPPPPPPPPPPPPXXXXXXX	IASAC(1)DVSVQNMK	IASAC(65.04)DVSVQNMK	5	2	0.29295	By matching	By matching	By MS/MS	By matching
C4LTX6	1063	C4LTX6	C4LTX6	>tr|C4LTX6|C4LTX6_ENTHI Pyruvate:ferredoxin oxidoreductase OS=Entamoeba histolytica OX=5759 GN=EHI_051060 PE=4 SV=1	1	80.1022	5.52602e-41	185.62	172.88	80.102	1	173.356	6.02626e-38	185.62					1	139.746	3.36028e-22	139.75	1	20.4823	0.0205912	20.482	1	80.1022	5.52602e-41	171.56						1;2	C	KEAESYNGVSLIIAYCPCKEQGVPLQKSIEE	X;X;X;X;X;X;X;X;X;X;X;X;X;X;X;Carbamidomethyl (C);X;Carbamidomethyl (C);NEM H2O;X;X;X;X;X;X;X;X;NEM H2O;X;X;X;X	PPPPPPPPPPPPPPPPPPPPPPPPPPPXXXX	EAESYNGVSLIIAYC(1)PC(1)KEQGVPLQK	EAESYNGVSLIIAYC(80.1)PC(80.1)KEQGVPLQK	15	3	0.38162	By MS/MS	By matching	By MS/MS	By MS/MS
C4LTX6	1065	C4LTX6	C4LTX6	>tr|C4LTX6|C4LTX6_ENTHI Pyruvate:ferredoxin oxidoreductase OS=Entamoeba histolytica OX=5759 GN=EHI_051060 PE=4 SV=1	1	80.1022	5.52602e-41	185.62	172.88	80.102	1	173.356	6.02626e-38	185.62					1	139.746	3.36028e-22	139.75	1	20.4823	0.0205912	20.482	1	80.1022	5.52602e-41	171.56						1;2	C	AESYNGVSLIIAYCPCKEQGVPLQKSIEEAK	X;X;X;X;X;X;X;X;X;X;X;X;X;Carbamidomethyl (C);NEM H2O;X;Carbamidomethyl (C);X;X;X;X;X;X;X;X;NEM H2O;X;X;X;X;X;X	PPPPPPPPPPPPPPPPPPPPPPPPPXXXXXX	EAESYNGVSLIIAYC(1)PC(1)KEQGVPLQK	EAESYNGVSLIIAYC(80.1)PC(80.1)KEQGVPLQK	17	3	0.38162	By MS/MS	By matching	By MS/MS	By MS/MS
C4LTX6	129	C4LTX6	C4LTX6	>tr|C4LTX6|C4LTX6_ENTHI Pyruvate:ferredoxin oxidoreductase OS=Entamoeba histolytica OX=5759 GN=EHI_051060 PE=4 SV=1	1	156.148	9.48768e-61	237.09	226.95	156.15	1	237.088	9.48768e-61	237.09	1	27.376	0.0440823	27.376	1	101.492	9.1816e-08	101.49	1	99.0922	2.62524e-07	99.092	1	156.148	7.43584e-23	156.15	0	0		NaN		1	C	GQALSIFGDHSDVMACRSTGFCLLSSHNVQQ	X;X;X;X;X;X;X;X;X;X;X;X;X;Oxidation (M);X;Carbamidomethyl (C);X;X;X;X;X;X;X;X;X;X;X;X;X;X;X	PPPPPPPPPPPPPPPPPXXXXXXXXXXXXXX	ALAGQALSIFGDHSDVMAC(1)R	ALAGQALSIFGDHSDVMAC(156.15)R	19	2	2.8487	By MS/MS	By MS/MS	By MS/MS	By MS/MS
C4LTX6	1012	C4LTX6	C4LTX6	>tr|C4LTX6|C4LTX6_ENTHI Pyruvate:ferredoxin oxidoreductase OS=Entamoeba histolytica OX=5759 GN=EHI_051060 PE=4 SV=1	1	29.3109	1.01362e-07	104.88	56.89	29.311	1	25.2122	1.01362e-07	104.88	1	58.2462	0.00349689	72.138	1	63.0755	0.00156927	73.841	1	36.5851	0.00699043	57.281	1	29.3109	0.000267038	92.538	1	41.1171	0.00369386	72.138		1	C	KATNLGAVVKFASSGCKRPKKDLGAIAMAYG	NEM H2O;X;X;X;X;X;X;X;X;NEM H2O;X;X;X;X;X;Carbamidomethyl (C);NEM H2O;X;X;X;NEM H2O;X;X;X;X;X;X;Oxidation (M);X;X;X	PPPPPPPPPPPPPPPPPPPPXXXXXXXXXXX	SKATNLGAVVKFASSGC(1)K	SKATNLGAVVKFASSGC(29.31)K	17	3	0.6452	By MS/MS	By MS/MS	By MS/MS	By MS/MS
C4LTX6	700	C4LTX6	C4LTX6	>tr|C4LTX6|C4LTX6_ENTHI Pyruvate:ferredoxin oxidoreductase OS=Entamoeba histolytica OX=5759 GN=EHI_051060 PE=4 SV=1	1	111.658	2.00893e-10	111.66	106.53	111.66	1	38.1751	1.21534e-06	107.11	1	59.2647	0.00103799	59.265	1	94.3843	3.53385e-08	98.898	1	60.2551	0.000964643	60.255	1	111.658	2.00893e-10	111.66	1	74.6109	0.000215721	74.611		1	C	QCNMCSLYCPHAAIRCFYLTPEESAKAPAEF	X;Carbamidomethyl (C);NEM H2O;X;Oxidation (M);Carbamidomethyl (C);NEM H2O;X;X;X;Carbamidomethyl (C);NEM;NEM H2O;X;X;X;X;X;X;Carbamidomethyl (C);X;X;X;X;X;X;X;X;X;X;X;X;X;X;X	XXXXXXXXXXXXXXXPPPPPPPPPPPPPPPP	C(1)FYLTPEESAKAPAEFVQIDGK	C(111.66)FYLTPEESAKAPAEFVQIDGK	1	3	-3.0507	By MS/MS	By MS/MS	By MS/MS	By MS/MS
C4LTX6	752	C4LTX6	C4LTX6	>tr|C4LTX6|C4LTX6_ENTHI Pyruvate:ferredoxin oxidoreductase OS=Entamoeba histolytica OX=5759 GN=EHI_051060 PE=4 SV=1	1	156.702	5.54561e-29	185.27	168.5	156.7	1	156.702	5.54561e-29	185.27	1	34.3949	0.000356256	58.079	1	95.6617	1.49584e-15	139.66	1	93.9091	1.58646e-05	93.909	1	91.6161	4.00781e-16	142.91	1	20.049	3.03133e-10	120.92		1	C	DCTGCEVCTTACPVKCLSMTPFEQVSEVESK	X;Carbamidomethyl (C);NEM;Propionamide_aa;X;X;Carbamidomethyl (C);NEM;NEM H2O;Propionamide_aa;X;X;Carbamidomethyl (C);NEM;NEM H2O;X;X;X;Carbamidomethyl (C);NEM;NEM H2O;X;X;X;Carbamidomethyl (C);X;X;Oxidation (M);X;X;X;X;X;X;X;X;X;X;X;X	XXXXXXXXXXXXXXXPPPPPPPPPPPPPPPP	C(1)LSMTPFEQVSEVESKNWEFAMTLSPK	C(156.7)LSMTPFEQVSEVESKNWEFAMTLSPK	1	3	-2.3107	By MS/MS	By MS/MS	By MS/MS	By MS/MS
C4LTX6	683	C4LTX6	C4LTX6	>tr|C4LTX6|C4LTX6_ENTHI Pyruvate:ferredoxin oxidoreductase OS=Entamoeba histolytica OX=5759 GN=EHI_051060 PE=4 SV=1	1	177.58	2.42339e-77	268.93	252.35	177.58	1	268.925	2.42339e-77	268.93	1	58.9802	0.00044585	63.682	1	199.076	6.88722e-31	199.08	1	68.5765	0.000135632	68.576	1	177.58	2.14075e-26	177.58	1	79.6515	0.000206794	79.652		3;4	C	KRGIATKIPTWEASKCVQCNMCSLYCPHAAI	X;X;X;X;X;X;NEM H2O;X;X;X;X;X;X;X;X;Carbamidomethyl (C);X;X;Carbamidomethyl (C);NEM H2O;X;Oxidation (M);Carbamidomethyl (C);NEM H2O;X;X;X;Carbamidomethyl (C);NEM;X;X;X;X;X	XXXXXXXXXXXXXXXPPPPPPPPPPPPPPPP	C(1)VQC(1)NMC(1)SLYC(1)PHAAIR	C(177.58)VQC(177.58)NMC(177.58)SLYC(177.58)PHAAIR	1	2	0.1671	By MS/MS	By MS/MS	By MS/MS	By MS/MS
C4LTX6	686	C4LTX6	C4LTX6	>tr|C4LTX6|C4LTX6_ENTHI Pyruvate:ferredoxin oxidoreductase OS=Entamoeba histolytica OX=5759 GN=EHI_051060 PE=4 SV=1	1	177.58	2.42339e-77	268.93	252.35	177.58	1	268.925	2.42339e-77	268.93	1	58.9802	4.79261e-06	98.281	1	199.076	2.24168e-53	239.58	1	68.5765	7.59964e-24	160.81	1	177.58	1.53509e-36	213.49	1	79.6515	7.26955e-07	107.5		2;3;4	C	IATKIPTWEASKCVQCNMCSLYCPHAAIRCF	X;X;X;NEM H2O;X;X;X;X;X;X;X;X;Carbamidomethyl (C);NEM;NEM H2O;X;X;Carbamidomethyl (C);X;Oxidation (M);Carbamidomethyl (C);NEM H2O;X;X;X;Carbamidomethyl (C);NEM;NEM H2O;X;X;X;X;X;X;Carbamidomethyl (C);NEM;NEM H2O;X	XXXXXXXXXXXXPPPPPPPPPPPPPPPPPXX	C(1)VQC(1)NMC(1)SLYC(1)PHAAIR	C(177.58)VQC(177.58)NMC(177.58)SLYC(177.58)PHAAIR	4	2	0.1671	By MS/MS	By MS/MS	By MS/MS	By MS/MS
C4LTX6	689	C4LTX6	C4LTX6	>tr|C4LTX6|C4LTX6_ENTHI Pyruvate:ferredoxin oxidoreductase OS=Entamoeba histolytica OX=5759 GN=EHI_051060 PE=4 SV=1	1	131.833	2.42339e-77	268.93	252.35	213.49	1	154.389	2.42339e-77	268.93	1	58.9802	4.79261e-06	98.281	1	151.64	2.24168e-53	239.58	1	98.7514	7.59964e-24	160.81	1	131.833	1.53509e-36	213.49	1	77.9158	7.26955e-07	107.5		2;3;4	C	KIPTWEASKCVQCNMCSLYCPHAAIRCFYLT	NEM H2O;X;X;X;X;X;X;X;X;Carbamidomethyl (C);NEM;NEM H2O;X;X;Carbamidomethyl (C);NEM H2O;X;Oxidation (M);Carbamidomethyl (C);X;X;X;Carbamidomethyl (C);NEM;NEM H2O;X;X;X;X;X;X;Carbamidomethyl (C);NEM;NEM H2O;X;X;X;X	XXXXXXXXXPPPPPPPPPPPPPPPPPXXXXX	CVQC(1)NMC(1)SLYC(1)PHAAIR	C(-57)VQC(57)NMC(131.83)SLYC(178.02)PHAAIR	7	2	-2.2099	By MS/MS	By MS/MS	By MS/MS	By MS/MS
C4LTX6	693	C4LTX6	C4LTX6	>tr|C4LTX6|C4LTX6_ENTHI Pyruvate:ferredoxin oxidoreductase OS=Entamoeba histolytica OX=5759 GN=EHI_051060 PE=4 SV=1	1	178.016	2.42339e-77	268.93	252.35	213.49	1	211.144	2.42339e-77	268.93	1	83.4007	4.79261e-06	98.281	1	190.724	2.24168e-53	239.58	1	136.754	7.59964e-24	160.81	1	178.016	1.53509e-36	213.49	1	96.4568	7.26955e-07	107.5		2;3;4	C	WEASKCVQCNMCSLYCPHAAIRCFYLTPEES	X;X;X;X;X;Carbamidomethyl (C);NEM;NEM H2O;X;X;Carbamidomethyl (C);NEM H2O;X;Oxidation (M);Carbamidomethyl (C);NEM H2O;X;X;X;Carbamidomethyl (C);X;X;X;X;X;X;Carbamidomethyl (C);NEM;NEM H2O;X;X;X;X;X;X;X;X	XXXXXPPPPPPPPPPPPPPPPPXXXXXXXXX	CVQC(1)NMC(1)SLYC(1)PHAAIR	C(-57)VQC(57)NMC(131.83)SLYC(178.02)PHAAIR	11	2	-2.2099	By MS/MS	By MS/MS	By MS/MS	By MS/MS
C4LTX6	484	C4LTX6	C4LTX6	>tr|C4LTX6|C4LTX6_ENTHI Pyruvate:ferredoxin oxidoreductase OS=Entamoeba histolytica OX=5759 GN=EHI_051060 PE=4 SV=1	1	59.6184	1.1898e-60	234.38	202.01	59.618	1	81.0159	6.87689e-52	227.88	1	130.556	1.32917e-15	130.56	1	46.3563	1.1898e-60	234.38	1	130.556	5.94406e-16	130.56	1	59.6184	2.85113e-44	209.85	1	48.6162	7.40663e-08	103.9		1	C	PIKSQYLIQNADYTACHFPNYVKKYKLLDAA	X;X;NEM H2O;X;X;X;X;X;X;X;X;X;X;X;X;Carbamidomethyl (C);X;X;X;X;X;X;NEM H2O;NEM H2O;X;X;X;X;X;X;X	PPPPPPPPPPPPPPPPPPPPPPPPXXXXXXX	SQYLIQNADYTAC(1)HFPNYVKK	SQYLIQNADYTAC(59.62)HFPNYVKK	13	3	1.1171	By MS/MS	By MS/MS	By MS/MS	By MS/MS
C4LTX6	353	C4LTX6	C4LTX6	>tr|C4LTX6|C4LTX6_ENTHI Pyruvate:ferredoxin oxidoreductase OS=Entamoeba histolytica OX=5759 GN=EHI_051060 PE=4 SV=1	1	58.9172	0.030176	58.917	22.522	58.917	1	58.9172	0.030176	58.917	0	0		NaN	0	0		NaN	0	0		NaN	0	0		NaN	0	0		NaN		1	C	LDVATTLLDAGKHIKCVGGRYGLGSKEFTPA	X;X;X;X;X;X;X;X;X;X;X;NEM H2O;X;X;NEM H2O;Carbamidomethyl (C);X;X;X;X;X;X;X;X;X;NEM H2O;X;X;X;X;X	XXXXXXXXXXXXPPPPPPPPXXXXXXXXXXX	HIKC(1)VGGR	HIKC(58.92)VGGR	4	2	-1.1228	By MS/MS	By matching	By matching	By matching
C4LTX6	103	C4LTX6	C4LTX6	>tr|C4LTX6|C4LTX6_ENTHI Pyruvate:ferredoxin oxidoreductase OS=Entamoeba histolytica OX=5759 GN=EHI_051060 PE=4 SV=1	1	82.5294	1.08071e-10	122.12	99.205	82.529	1	82.5294	1.08071e-10	122.12					1	74.2961	8.31896e-05	74.296	1	30.5749	0.0194144	30.575	1	82.5294	3.73932e-05	82.529	0	0		NaN		1	C	LMIPNMIKIAGEHLPCVFHVTARALAGQALS	X;X;X;X;X;X;X;X;X;X;X;X;X;X;X;Carbamidomethyl (C);X;X;X;X;X;X;X;X;X;X;X;X;X;X;X	XXXXXXXXPPPPPPPPPPPPPPPXXXXXXXX	IAGEHLPC(1)VFHVTAR	IAGEHLPC(82.53)VFHVTAR	8	3	0.17462	By MS/MS	By matching	By MS/MS	By MS/MS
C4LTX6	738	C4LTX6	C4LTX6	>tr|C4LTX6|C4LTX6_ENTHI Pyruvate:ferredoxin oxidoreductase OS=Entamoeba histolytica OX=5759 GN=EHI_051060 PE=4 SV=1	1	63.8686	2.59236e-61	239.03	208.44	63.869	1	117.478	1.48045e-59	233.34	1	91.2759	5.39385e-07	91.276	1	68.4198	2.59236e-61	239.03	1	86.3575	1.674e-06	86.357	1	63.8686	3.21915e-52	225.3	1	86.5572	1.28992e-08	111.66		2;3;4	C	QQAGYKFRIQVSAMDCTGCEVCTTACPVKCL	X;X;X;X;X;NEM H2O;X;X;X;X;X;X;X;Oxidation (M);X;Carbamidomethyl (C);X;X;Carbamidomethyl (C);NEM;NEM H2O;Propionamide_aa;X;X;Carbamidomethyl (C);NEM;NEM H2O;X;X;X;Carbamidomethyl (C);NEM;NEM H2O;X;X;X;Carbamidomethyl (C);NEM;NEM H2O;X	XXXXXXXXPPPPPPPPPPPPPPPPPPPPPXX	IQVSAMDC(1)TGC(1)EVC(1)TTAC(1)PVK	IQVSAMDC(63.87)TGC(63.87)EVC(63.87)TTAC(63.87)PVK	8	2	-1.2899	By MS/MS	By MS/MS	By MS/MS	By MS/MS
C4LTX6	741	C4LTX6	C4LTX6	>tr|C4LTX6|C4LTX6_ENTHI Pyruvate:ferredoxin oxidoreductase OS=Entamoeba histolytica OX=5759 GN=EHI_051060 PE=4 SV=1	1	63.8686	2.59236e-61	239.03	208.44	63.869	1	117.478	1.48045e-59	233.34	1	91.2759	5.39385e-07	91.276	1	68.4198	2.59236e-61	239.03	1	86.3575	1.674e-06	86.357	1	63.8686	3.21915e-52	225.3	1	86.5572	1.28992e-08	111.66		1;2;3;4	C	GYKFRIQVSAMDCTGCEVCTTACPVKCLSMT	X;X;NEM H2O;X;X;X;X;X;X;X;Oxidation (M);X;Carbamidomethyl (C);NEM;Propionamide_aa;X;X;Carbamidomethyl (C);X;X;Carbamidomethyl (C);NEM;NEM H2O;X;X;X;Carbamidomethyl (C);NEM;NEM H2O;X;X;X;Carbamidomethyl (C);NEM;NEM H2O;X;X;Oxidation (M);X	XXXXXPPPPPPPPPPPPPPPPPPPPPXXXXX	IQVSAMDC(1)TGC(1)EVC(1)TTAC(1)PVK	IQVSAMDC(63.87)TGC(63.87)EVC(63.87)TTAC(63.87)PVK	11	2	-1.2899	By MS/MS	By MS/MS	By MS/MS	By MS/MS
C4LTX6	744	C4LTX6	C4LTX6	>tr|C4LTX6|C4LTX6_ENTHI Pyruvate:ferredoxin oxidoreductase OS=Entamoeba histolytica OX=5759 GN=EHI_051060 PE=4 SV=1	1	63.8686	2.59236e-61	239.03	208.44	63.869	1	117.478	1.48045e-59	233.34	1	91.2759	5.39385e-07	91.276	1	68.4198	2.59236e-61	239.03	1	86.3575	1.674e-06	86.357	1	63.8686	3.21915e-52	225.3	1	86.5572	1.28992e-08	111.66		2;3;4	C	FRIQVSAMDCTGCEVCTTACPVKCLSMTPFE	X;X;X;X;X;X;X;Oxidation (M);X;Carbamidomethyl (C);NEM;Propionamide_aa;X;X;Carbamidomethyl (C);NEM;NEM H2O;Propionamide_aa;X;X;Carbamidomethyl (C);X;X;X;Carbamidomethyl (C);NEM;NEM H2O;X;X;X;Carbamidomethyl (C);NEM;NEM H2O;X;X;Oxidation (M);X;X;X;X	XXPPPPPPPPPPPPPPPPPPPPPXXXXXXXX	IQVSAMDC(1)TGC(1)EVC(1)TTAC(1)PVK	IQVSAMDC(63.87)TGC(63.87)EVC(63.87)TTAC(63.87)PVK	14	2	-1.2899	By MS/MS	By MS/MS	By MS/MS	By MS/MS
C4LTX6	748	C4LTX6	C4LTX6	>tr|C4LTX6|C4LTX6_ENTHI Pyruvate:ferredoxin oxidoreductase OS=Entamoeba histolytica OX=5759 GN=EHI_051060 PE=4 SV=1	1	63.8686	2.59236e-61	239.03	208.44	63.869	1	117.478	1.48045e-59	233.34	1	91.2759	5.39385e-07	91.276	1	68.4198	2.59236e-61	239.03	1	86.3575	1.674e-06	86.357	1	63.8686	3.21915e-52	225.3	1	86.5572	1.28992e-08	111.66		2;3;4	C	VSAMDCTGCEVCTTACPVKCLSMTPFEQVSE	X;X;X;Oxidation (M);X;Carbamidomethyl (C);NEM;Propionamide_aa;X;X;Carbamidomethyl (C);NEM;NEM H2O;Propionamide_aa;X;X;Carbamidomethyl (C);NEM;NEM H2O;X;X;X;Carbamidomethyl (C);X;X;X;Carbamidomethyl (C);NEM;NEM H2O;X;X;Oxidation (M);X;X;X;X;X;X;X;X	PPPPPPPPPPPPPPPPPPPXXXXXXXXXXXX	IQVSAMDC(1)TGC(1)EVC(1)TTAC(1)PVK	IQVSAMDC(63.87)TGC(63.87)EVC(63.87)TTAC(63.87)PVK	18	2	-1.2899	By MS/MS	By MS/MS	By MS/MS	By MS/MS
C4LTX6	509	C4LTX6	C4LTX6	>tr|C4LTX6|C4LTX6_ENTHI Pyruvate:ferredoxin oxidoreductase OS=Entamoeba histolytica OX=5759 GN=EHI_051060 PE=4 SV=1	1	208.962	7.54068e-65	208.96	197.16	208.96	1	208.962	7.54068e-65	208.96					1	90.4574	6.13428e-51	182.74	0	0		NaN	1	57.9812	1.20588e-51	187.19						1	C	KLLDAAKPNSVFVLNCPWTGAELEAQLPGSL	X;X;X;X;X;X;X;X;X;X;X;X;X;X;X;Carbamidomethyl (C);X;X;X;X;X;X;X;X;X;X;X;X;X;X;X	XPPPPPPPPPPPPPPPPPPPPPPPPPPPPPP	PNSVFVLNC(1)PWTGAELEAQLPGSLKR	PNSVFVLNC(208.96)PWTGAELEAQLPGSLKR	9	3	1.1861	By MS/MS	By matching	By MS/MS	By matching
C4LTX6	1109	C4LTX6	C4LTX6	>tr|C4LTX6|C4LTX6_ENTHI Pyruvate:ferredoxin oxidoreductase OS=Entamoeba histolytica OX=5759 GN=EHI_051060 PE=4 SV=1	1	98.4072	8.67024e-149	312.07	283.77	98.407	1	148.129	8.67024e-149	312.07	1	53.5645	0.000555368	53.565	1	125.542	4.12957e-89	250.24	1	81.0165	0.000123186	81.017	1	98.4072	6.36734e-30	194.27	1	58.2738	6.78861e-05	71.354		1	C	DPRLVEQGKPGLQLDCSEVKGDLEAFLAREN	X;X;X;X;X;X;X;X;NEM H2O;X;X;X;X;X;X;Carbamidomethyl (C);X;X;X;X;X;X;X;X;X;X;X;X;X;X;X	XXXPPPPPPPPPPPPPPPPPPPPPPPPPPXX	PGLQLDC(1)SEVK	PGLQLDC(98.41)SEVK	7	2	0.70925	By MS/MS	By MS/MS	By MS/MS	By MS/MS
C4LTX6	885	C4LTX6	C4LTX6	>tr|C4LTX6|C4LTX6_ENTHI Pyruvate:ferredoxin oxidoreductase OS=Entamoeba histolytica OX=5759 GN=EHI_051060 PE=4 SV=1	1	85.5632	4.41143e-47	241.66	199.84	85.563	1	89.4845	4.41143e-47	241.66	1	61.1614	0.00117535	83.206	1	147.493	1.03645e-26	147.49	1	85.8618	0.000170972	85.862	1	85.5632	3.20235e-25	149	1	56.9157	0.00117535	83.206		1	C	MFKANEQRRLYLEQICKEAIAEGKLSNELKT	Oxidation (M);X;X;X;X;X;X;X;X;X;X;X;X;X;X;Carbamidomethyl (C);NEM H2O;X;X;X;X;X;X;NEM H2O;X;X;X;X;X;X;X	XXXXXXXXPPPPPPPPPPPPPPPPXXXXXXX	RLYLEQIC(1)KEAIAEGK	RLYLEQIC(85.56)KEAIAEGK	8	4	0.041091	By MS/MS	By MS/MS	By MS/MS	By MS/MS
C4LTX6	803	C4LTX6	C4LTX6	>tr|C4LTX6|C4LTX6_ENTHI Pyruvate:ferredoxin oxidoreductase OS=Entamoeba histolytica OX=5759 GN=EHI_051060 PE=4 SV=1	1	211.658	4.50409e-142	309.91	290	211.66	1	57.3392	4.50409e-142	309.91	1	65.4279	8.63904e-06	65.428	1	270.884	2.07818e-94	270.88	1	107.652	5.84316e-12	107.65	1	211.658	5.01824e-55	211.66	1	111.268	2.49534e-12	111.27		1;2	C	KTTMIHQPYLEFSGACEGCNETALVKLITQL	NEM H2O;X;X;Oxidation (M);X;X;X;X;X;X;X;X;X;X;X;Carbamidomethyl (C);X;X;Carbamidomethyl (C);NEM;NEM H2O;Propionamide_aa;X;X;X;X;X;X;X;X;X;X;X;X	PPPPPPPPPPPPPPPPPPPPPPPPPPXXXXX	TTMIHQPYLEFSGAC(1)EGC(1)NETALVK	TTMIHQPYLEFSGAC(211.66)EGC(211.66)NETALVK	15	2	-0.61141	By MS/MS	By MS/MS	By MS/MS	By MS/MS
C4LTX6	806	C4LTX6	C4LTX6	>tr|C4LTX6|C4LTX6_ENTHI Pyruvate:ferredoxin oxidoreductase OS=Entamoeba histolytica OX=5759 GN=EHI_051060 PE=4 SV=1	1	211.658	4.50409e-142	309.91	290	211.66	1	57.3392	4.50409e-142	309.91	1	65.4279	8.63904e-06	65.428	1	270.884	2.07818e-94	270.88	1	107.652	5.84316e-12	107.65	1	211.658	5.01824e-55	211.66	1	111.268	2.49534e-12	111.27		1;2	C	MIHQPYLEFSGACEGCNETALVKLITQLYGE	Oxidation (M);X;X;X;X;X;X;X;X;X;X;X;Carbamidomethyl (C);NEM;NEM H2O;Propionamide_aa;X;X;Carbamidomethyl (C);X;X;X;X;X;X;X;X;X;X;X;X;X;X;X	PPPPPPPPPPPPPPPPPPPPPPPXXXXXXXX	TTMIHQPYLEFSGAC(1)EGC(1)NETALVK	TTMIHQPYLEFSGAC(211.66)EGC(211.66)NETALVK	18	2	-0.61141	By MS/MS	By MS/MS	By MS/MS	By MS/MS
C4LTX6	831	C4LTX6	C4LTX6	>tr|C4LTX6|C4LTX6_ENTHI Pyruvate:ferredoxin oxidoreductase OS=Entamoeba histolytica OX=5759 GN=EHI_051060 PE=4 SV=1	1	377.93	9.13619e-249	377.93	343.25	377.93	1	267.244	8.24528e-115	267.24					1	368.558	3.26948e-248	368.56	1	94.7674	2.94764e-13	94.767	1	377.93	9.13619e-249	377.93	1	114.485	1.1965e-21	114.49		1	C	TQLYGERTIIANATGCSSIWGATWGTNPYTV	X;X;X;X;X;X;X;X;X;X;X;X;X;X;X;Carbamidomethyl (C);X;X;X;X;X;X;X;X;X;X;X;X;X;X;X	XXXXXXXPPPPPPPPPPPPPPPPPPPPPPPP	TIIANATGC(1)SSIWGATWGTNPYTVDGEGR	TIIANATGC(377.93)SSIWGATWGTNPYTVDGEGR	9	2	0.49455	By MS/MS	By matching	By MS/MS	By MS/MS
C4LTX6	282	C4LTX6	C4LTX6	>tr|C4LTX6|C4LTX6_ENTHI Pyruvate:ferredoxin oxidoreductase OS=Entamoeba histolytica OX=5759 GN=EHI_051060 PE=4 SV=1	1	95.2051	7.33107e-16	129.11	124.76	95.205	1	55.3373	7.33107e-16	129.11	0	0		NaN	1	93.7762	1.89414e-08	108.75	1	80.5855	0.000155402	80.585	1	95.2051	3.95544e-11	118.37	0	0		NaN		1	C	RVVVVMGAAVPVLEECVDYLMKSGEKVGVLS	X;X;X;X;X;Oxidation (M);X;X;X;X;X;X;X;X;X;Carbamidomethyl (C);X;X;X;X;Oxidation (M);X;X;X;X;NEM H2O;X;X;X;X;X	XPPPPPPPPPPPPPPPPPPPPPXXXXXXXXX	VVVVMGAAVPVLEEC(1)VDYLMK	VVVVMGAAVPVLEEC(95.21)VDYLMK	15	3	-0.25438	By MS/MS	By matching	By MS/MS	By MS/MS
C4LTY4	37	C4LTY4	C4LTY4	>tr|C4LTY4|C4LTY4_ENTHI Uncharacterized protein OS=Entamoeba histolytica OX=5759 GN=EHI_067880 PE=4 SV=1	0.882618	9.26668	0.0261346	27.133	16.759	27.133	0.882618	9.26668	0.0261346	27.133																						1	C	SLRYLRAHEAKEHLNCPPECKLCEEHRSRRR	X;X;X;X;X;X;X;X;X;X;X;X;X;X;X;Carbamidomethyl (C);X;X;X;NEM;X;X;Propionamide_aa;X;X;X;X;X;X;X;X	XXXXXXXXXXXPPPPPPPPPPPPPPPPXXXX	EHLNC(0.883)PPEC(0.109)KLC(0.008)EEHR	EHLNC(9.27)PPEC(-9.27)KLC(-26.26)EEHR	5	2	1.3556	By MS/MS	By matching	By matching	By matching
C4LTY9	158	C4LTY9	C4LTY9	>tr|C4LTY9|C4LTY9_ENTHI Replication factor A, putative OS=Entamoeba histolytica OX=5759 GN=EHI_067930 PE=4 SV=1	0.5	0	0.0400393	22.641	8.8323	22.641	0	0		NaN					0.5	0	0.0400393	22.641														1	C	ESILFNLLKEQDSMKCCIKGYVVHKSRINEF	X;X;X;X;X;X;X;X;X;X;X;X;X;X;X;Carbamidomethyl (C);NEM H2O;X;X;X;X;X;X;X;X;X;X;X;X;X;X	XXXXXXXXXPPPPPPPPPPXXXXXXXXXXXX	EQDSMKC(0.5)C(0.5)IK	EQDSMKC(0)C(0)IK	7	3	3.6786	By matching	By matching	By MS/MS	By matching
C4LTY9	159	C4LTY9	C4LTY9	>tr|C4LTY9|C4LTY9_ENTHI Replication factor A, putative OS=Entamoeba histolytica OX=5759 GN=EHI_067930 PE=4 SV=1	0.5	0	0.0400393	22.641	8.8323	22.641	0	0		NaN					0.5	0	0.0400393	22.641														1	C	SILFNLLKEQDSMKCCIKGYVVHKSRINEFG	X;X;X;X;X;X;X;X;X;X;X;X;X;X;X;X;X;X;X;X;X;X;X;X;X;X;X;X;X;X;X	XXXXXXXXXXXXXXXXXXXXXXXXXXXXXXX	EQDSMKC(0.5)C(0.5)IK	EQDSMKC(0)C(0)IK	8	3	3.6786	By matching	By matching	By MS/MS	By matching
C4LTZ3	685	C4LTZ3	C4LTZ3	>tr|C4LTZ3|C4LTZ3_ENTHI Chorein, putative OS=Entamoeba histolytica OX=5759 GN=EHI_067970 PE=3 SV=1	1	34.9203	0.0381014	34.92	24.816	34.92																	1	34.9203	0.0381014	34.92						1	C	FDINIKDVSVSNQMVCSKENLPTEHQNYLIK	X;X;X;X;X;X;X;X;X;X;X;X;X;X;X;Carbamidomethyl (C);X;X;X;X;X;X;X;X;X;X;X;X;X;X;X	XXXXXXPPPPPPPPPPPPXXXXXXXXXXXXX	DVSVSNQMVC(1)SK	DVSVSNQMVC(34.92)SK	10	2	-3.688	By matching	By matching	By matching	By matching
C4LTZ3	1166	C4LTZ3	C4LTZ3	>tr|C4LTZ3|C4LTZ3_ENTHI Chorein, putative OS=Entamoeba histolytica OX=5759 GN=EHI_067970 PE=3 SV=1	1	56.2048	0.00126459	56.205	22.827	56.205	0	0		NaN	0	0		NaN	0	0		NaN	0	0		NaN	0	0		NaN	1	56.2048	0.00126459	56.205		1	C	NKNWRQLKPQIMKIQCEIAGPSIKIPIKDHP	X;X;X;X;X;X;X;X;X;X;X;X;X;X;X;Carbamidomethyl (C);X;X;X;X;X;X;X;X;X;X;X;X;X;X;X	XXXXXXXXXXXXXPPPPPPPPPPPXXXXXXX	IQC(1)EIAGPSIK	IQC(56.2)EIAGPSIK	3	2	0.5843	By matching	By matching	By matching	By matching
C4LU03;C4M7N4	313;313	C4LU03	C4LU03	>tr|C4LU03|C4LU03_ENTHI Serine carboxypeptidase (S28) family protein OS=Entamoeba histolytica OX=5759 GN=EHI_068090 PE=3 SV=1;>tr|C4M7N4|C4M7N4_ENTHI Serine carboxypeptidase (S28) family protein OS=Entamoeba histolytica OX=5759 GN=EHI_037190 PE=3 SV=1	1	93.4997	3.84047e-07	103.9	83.852	93.5	1	103.901	3.84047e-07	103.9					1	87.352	1.90996e-06	87.352					1	93.4997	9.642e-07	93.5						1	C	LFIKEKYNPEWADKECTPSSQEESYKTLQNT	X;X;X;X;X;X;X;X;X;X;X;X;X;X;X;Carbamidomethyl (C);X;X;X;X;X;X;X;X;X;X;X;X;X;X;X	XXXXPPPPPPPPPPPPPPPPPPPPPPXXXXX	YNPEWADKEC(1)TPSSQEESYK	YNPEWADKEC(93.5)TPSSQEESYK	10	3	-0.13961	By MS/MS	By matching	By MS/MS	By matching
C4LU03;C4M7N4	378;378	C4LU03	C4LU03	>tr|C4LU03|C4LU03_ENTHI Serine carboxypeptidase (S28) family protein OS=Entamoeba histolytica OX=5759 GN=EHI_068090 PE=3 SV=1;>tr|C4M7N4|C4M7N4_ENTHI Serine carboxypeptidase (S28) family protein OS=Entamoeba histolytica OX=5759 GN=EHI_037190 PE=3 SV=1	1	67.7985	6.02018e-10	76.573	65.42	67.799									1	67.7985	6.02018e-10	76.573														1	C	VKWGKLNQLQGSIDMCKDIYGIDKDTLYNAV	X;X;X;X;X;X;X;X;X;X;X;X;X;X;X;Carbamidomethyl (C);X;X;X;X;X;X;X;X;X;X;X;X;X;X;X	XXXXXPPPPPPPPPPPPPPPPPPPPPPPPPP	LNQLQGSIDMC(1)KDIYGIDKDTLYNAVDHINVR	LNQLQGSIDMC(67.8)KDIYGIDKDTLYNAVDHINVR	11	4	-2.1248	By matching	By matching	By MS/MS	By matching
C4LU03;C4M7N4	445;445	C4LU03	C4LU03	>tr|C4LU03|C4LU03_ENTHI Serine carboxypeptidase (S28) family protein OS=Entamoeba histolytica OX=5759 GN=EHI_068090 PE=3 SV=1;>tr|C4M7N4|C4M7N4_ENTHI Serine carboxypeptidase (S28) family protein OS=Entamoeba histolytica OX=5759 GN=EHI_037190 PE=3 SV=1	1	47.0818	0.00107058	47.082	42.824	47.082	1	27.1289	0.0186283	27.129					1	37.334	0.0049114	37.334					1	47.0818	0.00107058	47.082						1	C	HQEGNLVQLIDRTSHCSDLYSEKENDVPELK	X;X;X;X;X;X;X;X;X;X;X;X;X;X;X;Carbamidomethyl (C);X;X;X;X;X;X;X;X;X;X;X;X;X;X;X	XXXXXXXXXXXXPPPPPPPPPPPPPPPPPPP	TSHC(1)SDLYSEKENDVPELKK	TSHC(47.08)SDLYSEKENDVPELKK	4	4	-0.84912	By MS/MS	By matching	By MS/MS	By matching
C4LU09	682	C4LU09	C4LU09	>tr|C4LU09|C4LU09_ENTHI Tyrosine kinase, putative OS=Entamoeba histolytica OX=5759 GN=EHI_068160 PE=4 SV=1	1	52.4955	0.00194481	52.495	37.981	52.495					0	0		NaN					0	0		NaN					1	52.4955	0.00194481	52.495		1	C	STKPFNSDTYKAVQGCTLLSNNKLLRYCPTS	X;X;X;X;X;X;X;X;X;X;X;X;X;X;X;Carbamidomethyl (C);X;X;X;X;X;X;X;X;X;X;X;Carbamidomethyl (C);X;X;X	XXXXXXXXXXXPPPPPPPPPPPPXXXXXXXX	AVQGC(1)TLLSNNK	AVQGC(52.5)TLLSNNK	5	2	-0.63665	By matching	By matching	By matching	By matching
C4LU09	231	C4LU09	C4LU09	>tr|C4LU09|C4LU09_ENTHI Tyrosine kinase, putative OS=Entamoeba histolytica OX=5759 GN=EHI_068160 PE=4 SV=1	1	48.5679	0.0122163	48.568	37.404	48.568	1	48.5679	0.0122163	48.568																						2	C	RFGYNGGDKNEVKEDCTCTSVDGKWDKDDCT	X;X;X;X;X;X;X;X;X;X;X;X;X;X;X;Carbamidomethyl (C);X;Carbamidomethyl (C);X;X;X;X;X;X;X;X;X;X;X;X;X	XXXXXXXXXXXXXPPPPPPPPPPPXXXXXXX	EDC(1)TC(1)TSVDGK	EDC(48.57)TC(48.57)TSVDGK	3	2	-0.41512	By MS/MS	By matching	By matching	By matching
C4LU09	233	C4LU09	C4LU09	>tr|C4LU09|C4LU09_ENTHI Tyrosine kinase, putative OS=Entamoeba histolytica OX=5759 GN=EHI_068160 PE=4 SV=1	1	48.5679	0.0122163	48.568	37.404	48.568	1	48.5679	0.0122163	48.568																						2	C	GYNGGDKNEVKEDCTCTSVDGKWDKDDCTEF	X;X;X;X;X;X;X;X;X;X;X;X;X;Carbamidomethyl (C);X;Carbamidomethyl (C);X;X;X;X;X;X;X;X;X;X;X;X;X;X;X	XXXXXXXXXXXPPPPPPPPPPPXXXXXXXXX	EDC(1)TC(1)TSVDGK	EDC(48.57)TC(48.57)TSVDGK	5	2	-0.41512	By MS/MS	By matching	By matching	By matching
C4LU09	1449	C4LU09	C4LU09	>tr|C4LU09|C4LU09_ENTHI Tyrosine kinase, putative OS=Entamoeba histolytica OX=5759 GN=EHI_068160 PE=4 SV=1	1	43.8967	0.00477522	43.897	34.539	43.897	0	0		NaN																	1	43.8967	0.00477522	43.897		2	C	SCEVDQNCKIYENNQCSVCKDGYFKTSEGVC	X;X;X;X;X;X;X;X;X;X;X;X;X;X;X;Carbamidomethyl (C);X;X;Carbamidomethyl (C);X;X;X;X;X;X;X;X;X;X;X;Carbamidomethyl (C)	XXXXXXXXXPPPPPPPPPPPXXXXXXXXXXX	IYENNQC(1)SVC(1)K	IYENNQC(43.9)SVC(43.9)K	7	2	-2.1527	By matching	By matching	By matching	By matching
C4LU09	1452	C4LU09	C4LU09	>tr|C4LU09|C4LU09_ENTHI Tyrosine kinase, putative OS=Entamoeba histolytica OX=5759 GN=EHI_068160 PE=4 SV=1	1	43.8967	0.00477522	43.897	34.539	43.897	0	0		NaN																	1	43.8967	0.00477522	43.897		2	C	VDQNCKIYENNQCSVCKDGYFKTSEGVCSSC	X;X;X;X;X;X;X;X;X;X;X;X;Carbamidomethyl (C);X;X;Carbamidomethyl (C);X;X;X;X;X;X;X;X;X;X;X;Carbamidomethyl (C);X;X;Carbamidomethyl (C)	XXXXXXPPPPPPPPPPPXXXXXXXXXXXXXX	IYENNQC(1)SVC(1)K	IYENNQC(43.9)SVC(43.9)K	10	2	-2.1527	By matching	By matching	By matching	By matching
C4LU09	1401	C4LU09	C4LU09	>tr|C4LU09|C4LU09_ENTHI Tyrosine kinase, putative OS=Entamoeba histolytica OX=5759 GN=EHI_068160 PE=4 SV=1	1	47.223	0.0121676	47.223	30.022	47.223	1	47.223	0.0121676	47.223																						2	C	NIISCKSNYYLTSGECVSCSKKFKDCSICTE	X;X;X;X;X;X;X;X;X;X;X;X;X;X;X;Carbamidomethyl (C);X;X;Carbamidomethyl (C);X;X;NEM H2O;X;X;X;NEM;X;X;NEM;X;X	XXXXXXPPPPPPPPPPPPPPPXXXXXXXXXX	SNYYLTSGEC(1)VSC(1)SK	SNYYLTSGEC(47.22)VSC(47.22)SK	10	2	-0.73466	By MS/MS	By matching	By matching	By matching
C4LU09	1404	C4LU09	C4LU09	>tr|C4LU09|C4LU09_ENTHI Tyrosine kinase, putative OS=Entamoeba histolytica OX=5759 GN=EHI_068160 PE=4 SV=1	1	47.223	0.0121676	47.223	30.022	47.223	1	47.223	0.0121676	47.223																						2	C	SCKSNYYLTSGECVSCSKKFKDCSICTEKTC	X;X;X;X;X;X;X;X;X;X;X;X;Carbamidomethyl (C);X;X;Carbamidomethyl (C);X;X;NEM H2O;X;X;X;NEM;X;X;NEM;X;X;X;X;Carbamidomethyl (C)	XXXPPPPPPPPPPPPPPPXXXXXXXXXXXXX	SNYYLTSGEC(1)VSC(1)SK	SNYYLTSGEC(47.22)VSC(47.22)SK	13	2	-0.73466	By MS/MS	By matching	By matching	By matching
C4LU09	607	C4LU09	C4LU09	>tr|C4LU09|C4LU09_ENTHI Tyrosine kinase, putative OS=Entamoeba histolytica OX=5759 GN=EHI_068160 PE=4 SV=1	1	28.9033	0.0469899	28.903	18.766	28.903																	1	28.9033	0.0469899	28.903							C	DFSSLKSVTIESSLYCKVMNVAKTTKIKVSA	X;X;X;X;X;X;X;X;X;X;X;X;X;X;X;Carbamidomethyl (C);X;X;X;X;X;X;X;X;X;X;X;X;X;X;X	XXXXXXPPPPPPPPPPPXXXXXXXXXXXXXX	SVTIESSLYC(1)K	SVTIESSLYC(28.9)K	10	2	-3.4461	By matching	By matching	By matching	By matching
C4LU09	1419	C4LU09	C4LU09	>tr|C4LU09|C4LU09_ENTHI Tyrosine kinase, putative OS=Entamoeba histolytica OX=5759 GN=EHI_068160 PE=4 SV=1	1	94.7168	5.17677e-06	94.717	67.558	94.717	1	46.6804	0.00226468	46.68	0	0		NaN	1	91.812	8.45816e-06	91.812	0	0		NaN	1	94.7168	5.17677e-06	94.717	1	40.2776	0.00363442	40.278		2	C	CSKKFKDCSICTEKTCITCSSPNAYITKDGS	Carbamidomethyl (C);X;X;NEM H2O;X;X;X;NEM;X;X;NEM;X;X;X;X;Carbamidomethyl (C);X;X;Carbamidomethyl (C);X;X;X;X;X;X;X;X;X;X;X;X	XXXXXXXXXXXXXXPPPPPPPPPPPPPPXXX	TC(1)ITC(1)SSPNAYITK	TC(94.72)ITC(94.72)SSPNAYITK	2	2	-0.84389	By MS/MS	By matching	By MS/MS	By matching
C4LU09	1422	C4LU09	C4LU09	>tr|C4LU09|C4LU09_ENTHI Tyrosine kinase, putative OS=Entamoeba histolytica OX=5759 GN=EHI_068160 PE=4 SV=1	1	94.7168	5.17677e-06	94.717	67.558	94.717	1	46.6804	0.00226468	46.68	0	0		NaN	1	91.812	8.45816e-06	91.812	0	0		NaN	1	94.7168	5.17677e-06	94.717	1	40.2776	0.00363442	40.278		2	C	KFKDCSICTEKTCITCSSPNAYITKDGSCEV	NEM H2O;X;X;X;NEM;X;X;NEM;X;X;X;X;Carbamidomethyl (C);X;X;Carbamidomethyl (C);X;X;X;X;X;X;X;X;X;X;X;X;X;X;X	XXXXXXXXXXXPPPPPPPPPPPPPPXXXXXX	TC(1)ITC(1)SSPNAYITK	TC(94.72)ITC(94.72)SSPNAYITK	5	2	-0.84389	By MS/MS	By matching	By MS/MS	By matching
C4LU09	1464	C4LU09	C4LU09	>tr|C4LU09|C4LU09_ENTHI Tyrosine kinase, putative OS=Entamoeba histolytica OX=5759 GN=EHI_068160 PE=4 SV=1	1	79.3371	6.97752e-11	122.33	118.88	79.337	1	122.327	6.97752e-11	122.33					0	0		NaN					1	79.3371	4.26037e-05	79.337						3	C	CSVCKDGYFKTSEGVCSSCTTGCNKCKDSSL	Carbamidomethyl (C);X;X;Carbamidomethyl (C);X;X;X;X;X;X;X;X;X;X;X;Carbamidomethyl (C);X;X;Carbamidomethyl (C);X;X;X;Carbamidomethyl (C);X;X;X;X;X;X;X;X	XXXXXXXXXXPPPPPPPPPPPPPPPXXXXXX	TSEGVC(1)SSC(1)TTGC(1)NK	TSEGVC(79.34)SSC(79.34)TTGC(79.34)NK	6	2	0.84559	By MS/MS	By matching	By matching	By matching
C4LU09	1467	C4LU09	C4LU09	>tr|C4LU09|C4LU09_ENTHI Tyrosine kinase, putative OS=Entamoeba histolytica OX=5759 GN=EHI_068160 PE=4 SV=1	1	79.3371	6.97752e-11	122.33	118.88	79.337	1	122.327	6.97752e-11	122.33					0	0		NaN					1	79.3371	4.26037e-05	79.337						3	C	CKDGYFKTSEGVCSSCTTGCNKCKDSSLCLE	Carbamidomethyl (C);X;X;X;X;X;X;X;X;X;X;X;Carbamidomethyl (C);X;X;Carbamidomethyl (C);X;X;X;Carbamidomethyl (C);X;X;X;X;X;X;X;X;X;X;X	XXXXXXXPPPPPPPPPPPPPPPXXXXXXXXX	TSEGVC(1)SSC(1)TTGC(1)NK	TSEGVC(79.34)SSC(79.34)TTGC(79.34)NK	9	2	0.84559	By MS/MS	By matching	By matching	By matching
C4LU09	1471	C4LU09	C4LU09	>tr|C4LU09|C4LU09_ENTHI Tyrosine kinase, putative OS=Entamoeba histolytica OX=5759 GN=EHI_068160 PE=4 SV=1	1	79.3371	6.97752e-11	122.33	118.88	79.337	1	122.327	6.97752e-11	122.33					0	0		NaN					1	79.3371	4.26037e-05	79.337						3	C	YFKTSEGVCSSCTTGCNKCKDSSLCLECSDS	X;X;X;X;X;X;X;X;Carbamidomethyl (C);X;X;Carbamidomethyl (C);X;X;X;Carbamidomethyl (C);X;X;X;X;X;X;X;X;X;X;X;X;X;X;X	XXXPPPPPPPPPPPPPPPXXXXXXXXXXXXX	TSEGVC(1)SSC(1)TTGC(1)NK	TSEGVC(79.34)SSC(79.34)TTGC(79.34)NK	13	2	0.84559	By MS/MS	By matching	By matching	By matching
C4LU09	661	C4LU09	C4LU09	>tr|C4LU09|C4LU09_ENTHI Tyrosine kinase, putative OS=Entamoeba histolytica OX=5759 GN=EHI_068160 PE=4 SV=1	1	66.6133	2.24307e-05	66.613	50.302	66.613	1	66.6133	2.24307e-05	66.613	0	0		NaN	0	0		NaN									0	0		NaN		1	C	TSPEYLLIKTVSGNVCSDIASSTKPFNSDTY	X;X;X;X;X;X;X;X;X;X;X;X;X;X;X;Carbamidomethyl (C);X;X;X;X;X;X;X;X;X;X;X;X;X;X;X	XXXXXXXXXPPPPPPPPPPPPPPPPPPPPPP	TVSGNVC(1)SDIASSTKPFNSDTYK	TVSGNVC(66.61)SDIASSTKPFNSDTYK	7	3	-0.092487	By MS/MS	By matching	By matching	By matching
C4LU09	1357	C4LU09	C4LU09	>tr|C4LU09|C4LU09_ENTHI Tyrosine kinase, putative OS=Entamoeba histolytica OX=5759 GN=EHI_068160 PE=4 SV=1	1	38.9953	0.0104886	38.995	23.45	38.995	1	38.9953	0.0104886	38.995																							C	GCDSKCSNCKVTTDQCITCNINKKYMSVSGE	X;X;X;X;X;X;X;X;X;X;X;X;X;X;X;Carbamidomethyl (C);X;X;Carbamidomethyl (C);X;X;X;X;X;X;X;X;X;X;X;X	XXXXXXXXXXPPPPPPPPPPPPPPXXXXXXX	VTTDQC(1)ITC(1)NINKK	VTTDQC(39)ITC(39)NINKK	6	3	0.649	By matching	By matching	By matching	By matching
C4LU09	1360	C4LU09	C4LU09	>tr|C4LU09|C4LU09_ENTHI Tyrosine kinase, putative OS=Entamoeba histolytica OX=5759 GN=EHI_068160 PE=4 SV=1	1	38.9953	0.0104886	38.995	23.45	38.995	1	38.9953	0.0104886	38.995																							C	SKCSNCKVTTDQCITCNINKKYMSVSGECSL	X;X;X;X;X;X;X;X;X;X;X;X;Carbamidomethyl (C);X;X;Carbamidomethyl (C);X;X;X;X;X;X;X;X;X;X;X;X;X;X;X	XXXXXXXPPPPPPPPPPPPPPXXXXXXXXXX	VTTDQC(1)ITC(1)NINKK	VTTDQC(39)ITC(39)NINKK	9	3	0.649	By matching	By matching	By matching	By matching
C4LU09	694	C4LU09	C4LU09	>tr|C4LU09|C4LU09_ENTHI Tyrosine kinase, putative OS=Entamoeba histolytica OX=5759 GN=EHI_068160 PE=4 SV=1	1	34.0003	0.00270695	50.46	27.315	34	1	38.1777	0.0202652	38.178					1	50.4595	0.00270695	50.46	0	0		NaN	1	34.0003	0.0302851	34	1	42.0307	0.0110237	42.031		1	C	VQGCTLLSNNKLLRYCPTSNTEDTVKCSMKG	X;X;X;Carbamidomethyl (C);X;X;X;X;X;X;X;X;X;X;X;Carbamidomethyl (C);X;X;X;X;X;X;X;X;X;X;X;X;X;X;X	XXXXXXXXXXXXXXPPPPPPPPPPPPXXXXX	YC(1)PTSNTEDTVK	YC(34)PTSNTEDTVK	2	2	-0.16461	By matching	By matching	By MS/MS	By matching
C4LU18	188	C4LU18	C4LU18	>tr|C4LU18|C4LU18_ENTHI Adenosylhomocysteinase OS=Entamoeba histolytica OX=5759 GN=EHI_068250 PE=2 SV=1	1	67.5191	6.81089e-05	81.92	61.353	67.519	1	81.9197	6.81089e-05	81.92					1	79.492	9.63586e-05	79.492	1	73.2733	0.000168721	73.273	1	67.5191	0.00033578	67.519	1	62.0879	0.000697604	62.088		1	C	ENPRFWHNILPEIRGCSEETTTGVLRLKQMV	X;X;X;X;X;X;X;X;X;X;X;X;X;X;X;Carbamidomethyl (C);X;X;X;X;X;X;X;X;X;X;X;X;X;X;X	XXXXXXXXXXXXXXPPPPPPPPPPPPXXXXX	GC(1)SEETTTGVLR	GC(67.52)SEETTTGVLR	2	2	0.049304	By MS/MS	By matching	By MS/MS	By MS/MS
C4LU18	230	C4LU18	C4LU18	>tr|C4LU18|C4LU18_ENTHI Adenosylhomocysteinase OS=Entamoeba histolytica OX=5759 GN=EHI_068250 PE=2 SV=1	1	33.7607	0.0408507	33.761	26.111	33.761	0	0		NaN					0	0		NaN					1	33.7607	0.0408507	33.761							C	VNDSVTKSKFDNIYGCRHSLIDGINRATDVM	X;X;X;X;X;X;X;X;X;X;X;X;X;X;X;Carbamidomethyl (C);X;X;X;X;X;X;X;X;X;X;X;X;X;X;Oxidation (M)	XXXXXXXPPPPPPPPPPXXXXXXXXXXXXXX	SKFDNIYGC(1)R	SKFDNIYGC(33.76)R	9	2	2.5635	By matching	By matching	By matching	By matching
C4LU18	252	C4LU18	C4LU18	>tr|C4LU18|C4LU18_ENTHI Adenosylhomocysteinase OS=Entamoeba histolytica OX=5759 GN=EHI_068250 PE=2 SV=1	1	56.9556	0.00104012	69.03	53.886	56.956					1	39.2671	0.0511283	39.267					1	69.0301	0.00104012	69.03					1	56.9556	0.00508441	56.956		2	C	GINRATDVMIGGKVACVCGYGDVGKGCAESL	X;X;X;X;X;X;X;X;Oxidation (M);X;X;X;X;X;X;Carbamidomethyl (C);X;Carbamidomethyl (C);X;X;X;X;X;X;X;X;X;X;X;X;X	XXXXXXXXXXXXXPPPPPPPPPPPPXXXXXX	VAC(1)VC(1)GYGDVGK	VAC(56.96)VC(56.96)GYGDVGK	3	2	-0.44453	By matching	By MS/MS	By matching	By MS/MS
C4LU18	254	C4LU18	C4LU18	>tr|C4LU18|C4LU18_ENTHI Adenosylhomocysteinase OS=Entamoeba histolytica OX=5759 GN=EHI_068250 PE=2 SV=1	1	56.9556	0.00104012	69.03	53.886	56.956					1	39.2671	0.0511283	39.267					1	69.0301	0.00104012	69.03					1	56.9556	0.00508441	56.956		2	C	NRATDVMIGGKVACVCGYGDVGKGCAESLRG	X;X;X;X;X;X;Oxidation (M);X;X;X;X;X;X;Carbamidomethyl (C);X;Carbamidomethyl (C);X;X;X;X;X;X;X;X;X;X;X;X;X;X;X	XXXXXXXXXXXPPPPPPPPPPPPXXXXXXXX	VAC(1)VC(1)GYGDVGK	VAC(56.96)VC(56.96)GYGDVGK	5	2	-0.44453	By matching	By MS/MS	By matching	By MS/MS
C4LU25	79	C4LU25	C4LU25	>tr|C4LU25|C4LU25_ENTHI Glycerophosphoryl diester phosphodiesterase, putative OS=Entamoeba histolytica OX=5759 GN=EHI_068320 PE=4 SV=1	1	60.9367	0.000423977	60.937	52.192	60.937	1	60.9367	0.000423977	60.937																						1	C	AMKISYYKYHVDLLECDIQMTKDNKFVLLHD	X;Oxidation (M);X;X;X;X;X;X;X;X;X;X;X;X;X;Carbamidomethyl (C);X;X;X;X;X;X;X;X;X;X;X;X;X;X;X	XXXXXXXXPPPPPPPPPPPPPPXXXXXXXXX	YHVDLLEC(1)DIQMTK	YHVDLLEC(60.94)DIQMTK	8	3	-1.5481	By MS/MS	By matching	By matching	By matching
C4LU30	255	C4LU30	C4LU30	>tr|C4LU30|C4LU30_ENTHI Uncharacterized protein OS=Entamoeba histolytica OX=5759 GN=EHI_068370 PE=4 SV=1	1	88.5548	1.02281e-09	88.555	78.864	88.555																	1	88.5548	1.02281e-09	88.555						2	C	ASESQFDTSIKIFDSCKEELIGSNDNACGTQ	X;X;X;X;X;X;X;X;X;X;X;X;X;X;X;Carbamidomethyl (C);X;X;X;X;X;X;X;X;X;X;X;Carbamidomethyl (C);X;X;X	XXXXXXXXXXXPPPPPPPPPPPPPPPPPPPP	IFDSC(1)KEELIGSNDNAC(1)GTQSK	IFDSC(88.55)KEELIGSNDNAC(88.55)GTQSK	5	3	-2.86	By matching	By matching	By matching	By matching
C4LU30	267	C4LU30	C4LU30	>tr|C4LU30|C4LU30_ENTHI Uncharacterized protein OS=Entamoeba histolytica OX=5759 GN=EHI_068370 PE=4 SV=1	1	88.5548	1.02281e-09	88.555	78.864	88.555																	1	88.5548	1.02281e-09	88.555						2	C	FDSCKEELIGSNDNACGTQSKITFLSKNTDY	X;X;X;Carbamidomethyl (C);X;X;X;X;X;X;X;X;X;X;X;Carbamidomethyl (C);X;X;X;X;X;X;X;X;X;X;X;X;X;X;X	PPPPPPPPPPPPPPPPPPPPPXXXXXXXXXX	IFDSC(1)KEELIGSNDNAC(1)GTQSK	IFDSC(88.55)KEELIGSNDNAC(88.55)GTQSK	17	3	-2.86	By matching	By matching	By matching	By matching
C4LU30	389	C4LU30	C4LU30	>tr|C4LU30|C4LU30_ENTHI Uncharacterized protein OS=Entamoeba histolytica OX=5759 GN=EHI_068370 PE=4 SV=1	1	54.0684	0.00222746	54.068	43.61	54.068	0	0		NaN					1	32.2948	0.0343758	32.295					1	54.0684	0.00222746	54.068							C	NKSSTLLSKTDNTNVCGEFGKYLQLHVSSSE	X;X;X;X;X;X;X;X;X;X;X;X;X;X;X;Carbamidomethyl (C);X;X;X;X;X;X;X;X;X;X;X;X;X;X;X	XXXXXXXXXPPPPPPPPPPPPXXXXXXXXXX	TDNTNVC(1)GEFGK	TDNTNVC(54.07)GEFGK	7	2	-0.21777	By matching	By matching	By matching	By matching
C4LUL8;C4LU31	186;186	C4LUL8	C4LUL8	>tr|C4LUL8|C4LUL8_ENTHI Thioredoxin, putative OS=Entamoeba histolytica OX=5759 GN=EHI_023060 PE=4 SV=1;>tr|C4LU31|C4LU31_ENTHI Thioredoxin, putative OS=Entamoeba histolytica OX=5759 GN=EHI_068390 PE=4 SV=1	1	70.6847	2.92494e-06	163.51	115.52	70.685	1	127.174	3.07828e-05	127.17	0	0		NaN	1	59.1984	1.78596e-05	156.36	0	0		NaN	1	70.6847	2.92494e-06	163.51	0	0		NaN		1	C	ENISRESKLRIGEVNCDKESRLCSIYSISHY	X;X;X;X;X;X;X;X;X;X;X;X;X;X;X;Carbamidomethyl (C);X;X;X;X;X;X;Carbamidomethyl (C);X;X;X;X;X;X;X;X	XXXXXXXXXXPPPPPPPPPPPXXXXXXXXXX	IGEVNC(1)DKESR	IGEVNC(70.68)DKESR	6	3	0.098228	By MS/MS	By matching	By MS/MS	By matching
C4LUL8;C4LU31	193;193	C4LUL8	C4LUL8	>tr|C4LUL8|C4LUL8_ENTHI Thioredoxin, putative OS=Entamoeba histolytica OX=5759 GN=EHI_023060 PE=4 SV=1;>tr|C4LU31|C4LU31_ENTHI Thioredoxin, putative OS=Entamoeba histolytica OX=5759 GN=EHI_068390 PE=4 SV=1	1	67.6437	1.69977e-26	177.67	166.02	67.644	1	68.2426	8.03903e-05	68.243					1	25.9951	1.69977e-26	177.67					1	67.6437	9.29688e-05	67.644						1	C	KLRIGEVNCDKESRLCSIYSISHYPTIIYIT	X;X;X;X;X;X;X;X;Carbamidomethyl (C);X;X;X;X;X;X;Carbamidomethyl (C);X;X;X;X;X;X;X;X;X;X;X;X;X;X;X	XXXXXXXXXXXXXXPPPPPPPPPPPPPPPPP	LC(1)SIYSISHYPTIIYITK	LC(67.64)SIYSISHYPTIIYITK	2	3	0.29801	By MS/MS	By matching	By MS/MS	By matching
C4LU38	27	C4LU38	C4LU38	>tr|C4LU38|C4LU38_ENTHI COP9 signalosome subunit, putative OS=Entamoeba histolytica OX=5759 GN=EHI_068470 PE=4 SV=1	1	47.7121	0.0125591	47.712	15.503	47.712	1	47.7121	0.0125591	47.712																						1	C	ALISITQSATHKTINCGTNKPERSVGILLGI	X;X;X;X;X;X;X;X;X;X;X;X;X;X;X;Carbamidomethyl (C);X;X;X;X;X;X;X;X;X;X;X;X;X;X;X	XXXXXXXXXXXXPPPPPPPPPPPXXXXXXXX	TINC(1)GTNKPER	TINC(47.71)GTNKPER	4	2	0.9274	By MS/MS	By matching	By matching	By matching
C4LU42	77	C4LU42	C4LU42	>tr|C4LU42|C4LU42_ENTHI Uncharacterized protein OS=Entamoeba histolytica OX=5759 GN=EHI_068510 PE=4 SV=1	1	78.6898	6.75096e-20	183.31	148.35	78.69	1	81.4475	1.60166e-19	176.49					1	78.6898	6.75096e-20	183.31	1	28.7269	0.0338315	28.727	0	0		NaN	1	57.4139	0.000431375	57.414		1	C	VVHSSGKFLRALLTNCHIAQEAAIKAGLGVV	X;X;X;X;X;X;NEM H2O;X;X;X;X;X;X;X;X;Carbamidomethyl (C);X;X;X;X;X;X;X;X;X;X;X;X;X;X;X	XXXXXXXXXXPPPPPPPPPPPPPPPXXXXXX	ALLTNC(1)HIAQEAAIK	ALLTNC(78.69)HIAQEAAIK	6	3	-0.75915	By MS/MS	By matching	By MS/MS	By matching
C4LU42	42	C4LU42	C4LU42	>tr|C4LU42|C4LU42_ENTHI Uncharacterized protein OS=Entamoeba histolytica OX=5759 GN=EHI_068510 PE=4 SV=1	1	130.992	5.19818e-08	130.99	98.663	130.99	0	0		NaN					1	122.344	5.19818e-08	122.34					1	130.992	1.33612e-07	130.99						2	C	SKIQDKEKGQSRKSKCIEENICQTLMKNIQS	X;X;X;X;X;NEM H2O;X;X;X;X;X;X;X;X;X;Carbamidomethyl (C);X;X;X;X;X;Carbamidomethyl (C);X;X;X;X;X;X;X;X;X	XXXXXXXXXXXXXXXPPPPPPPPPPPPXXXX	C(1)IEENIC(1)QTLMK	C(130.99)IEENIC(130.99)QTLMK	1	2	-1.1426	By matching	By matching	By MS/MS	By matching
C4LU42	48	C4LU42	C4LU42	>tr|C4LU42|C4LU42_ENTHI Uncharacterized protein OS=Entamoeba histolytica OX=5759 GN=EHI_068510 PE=4 SV=1	1	130.992	5.19818e-08	130.99	98.663	130.99	0	0		NaN					1	122.344	5.19818e-08	122.34					1	130.992	1.33612e-07	130.99						2	C	EKGQSRKSKCIEENICQTLMKNIQSGDSEVV	X;X;X;X;X;X;X;X;X;Carbamidomethyl (C);X;X;X;X;X;Carbamidomethyl (C);X;X;X;X;X;X;X;X;X;X;X;X;X;X;X	XXXXXXXXXPPPPPPPPPPPPXXXXXXXXXX	C(1)IEENIC(1)QTLMK	C(130.99)IEENIC(130.99)QTLMK	7	2	-1.1426	By matching	By matching	By MS/MS	By matching
C4LU42	298	C4LU42	C4LU42	>tr|C4LU42|C4LU42_ENTHI Uncharacterized protein OS=Entamoeba histolytica OX=5759 GN=EHI_068510 PE=4 SV=1	1	156.811	1.29072e-11	159.66	119.72	156.81	1	159.656	1.29072e-11	159.66	1	72.8912	0.000125489	72.891	1	136.299	7.32406e-11	136.3	0	0		NaN	1	156.811	2.71212e-11	156.81	1	77.8945	7.62207e-05	77.894		1	C	NFSQTDSKEVEVHQKCSEIVSNYTNISKEGA	X;X;X;X;X;X;X;X;X;X;X;X;X;X;X;Carbamidomethyl (C);X;X;X;X;X;X;X;X;X;X;X;X;X;X;X	XXXXXXXXXXXXXXXPPPPPPPPPPPPPXXX	C(1)SEIVSNYTNISK	C(156.81)SEIVSNYTNISK	1	2	1.0023	By MS/MS	By MS/MS	By MS/MS	By matching
C4LU42	361	C4LU42	C4LU42	>tr|C4LU42|C4LU42_ENTHI Uncharacterized protein OS=Entamoeba histolytica OX=5759 GN=EHI_068510 PE=4 SV=1	1	172.82	9.51463e-24	190.44	163	172.82	1	95.7553	1.0064e-05	95.755					1	190.435	9.51463e-24	190.44					1	172.82	3.02419e-18	172.82						1	C	AMDQNEDEDKIISRGCGFLQNISDFEEGRKA	X;Oxidation (M);X;X;X;X;X;X;X;X;X;X;X;X;X;Carbamidomethyl (C);X;X;X;X;X;X;X;X;X;X;X;X;X;X;X	XXXXXXXXXXXXXXPPPPPPPPPPPPPPPPX	GC(1)GFLQNISDFEEGRK	GC(172.82)GFLQNISDFEEGRK	2	2	-1.2176	By MS/MS	By matching	By MS/MS	By matching
C4LU42	198	C4LU42	C4LU42	>tr|C4LU42|C4LU42_ENTHI Uncharacterized protein OS=Entamoeba histolytica OX=5759 GN=EHI_068510 PE=4 SV=1	1	94.6877	4.28512e-06	94.688	63.194	94.688	1	92.8564	5.99205e-06	92.856	1	48.5269	0.00279356	48.527	1	94.6877	4.28512e-06	94.688	1	54.8978	0.000942327	54.898	1	94.6877	4.28512e-06	94.688	1	65.0429	0.000393083	65.043		1	C	GEEDETLARLIGGFLCNAAGEKETQVQFNEA	X;X;X;X;X;X;X;X;X;X;X;X;X;X;X;Carbamidomethyl (C);X;X;X;X;X;X;X;X;X;X;X;X;X;X;X	XXXXXXXXXPPPPPPPPPPPPPXXXXXXXXX	LIGGFLC(1)NAAGEK	LIGGFLC(94.69)NAAGEK	7	2	0.35538	By MS/MS	By MS/MS	By MS/MS	By MS/MS
[truncated: 2,830 more rows]
[truncated: 53 more columns]
