# Supplementary material for: Insights Into the Mechanisms of <em>Lactobacillus acidophilus</em> Activity Against <em>Entamoeba histolytica</em> by Using Thiol-Redox-Proteomics
Source: Preprints.org preprint supplement (doi:10.20944/preprints202203.0201.v1), 2022-03-15
Supplement: Supplementary file 2 [file Table S1.xlsx]

## Sheet: Legend
.Legend
.LA1, LA2 and LA3 are biological repetitions of E.histolytica trophozoites incubated with L.acidophilus
.-DTT (negative control): OX-RAC performed in absence of DTT
.+DTT: OX-RAC performed in presence of DTT ( binding of OXs to the thiopropyl resin)
p-value < 0.05 or q-value < 0.05 are labeled in green
difference > are labeled yellow. Difference <=-1 are labled in blue

## Sheet: OXs in E.h incubated with L.a
Majority protein IDs	Protein names	Gene names	Student's T-test p-value Plus DTT_Minus DTT	Student's T-test q-value Plus DTT_Minus DTT	Student's T-test Difference Plus DTT_Minus DTT	Intensity LA1+DTT	Intensity LA1-DTT	Intensity LA2+DTT	Intensity LA2-DTT	Intensity LA3+DTT	Intensity LA3-DTT	Intensity LA1+DTT_1	Intensity LA1-DTT_1	Intensity LA2+DTT_1	Intensity LA2-DTT_1	Intensity LA3+DTT_1	Intensity LA3-DTT_1	Only identified by site	Potential contaminant	Student's T-test Significant Plus DTT_Minus DTT	Student's T-test significant	Razor + unique peptides	Sequence coverage [%]	Unique + razor sequence coverage [%]	Unique sequence coverage [%]	Mol. weight [kDa]	Q-value	Score	Razor + unique peptides LA1+DTT	Razor + unique peptides LA1-DTT	Razor + unique peptides LA2+DTT	Razor + unique peptides LA2-DTT	Razor + unique peptides LA3+DTT	Razor + unique peptides LA3-DTT	Protein IDs	id	Fasta headers
C4M8S6	Acid phosphatase, putative	EHI_146950	0.00209682	0.0487947	11.3472	31.2869	19	30.8755	20.3857	30.2647	19	2620000000	0	1970000000	1370000	1290000000	0			+	Plus DTT_Minus DTT	19	42.6	42.6	42.6	49.338	0	78.942	17	0	18	1	19	0	C4M8S6	1824	>tr|C4M8S6|C4M8S6_ENTHI Acid phosphatase, putative OS=Entamoeba histolytica OX=5759 GN=EHI_146950 PE=2 SV=1
Q8I8E0;B1N5G3	Cysteine protease 8;Cysteine proteinase, putative	CP8;EHI_010850	0.000936439	0.0487947	10.5167	30.1239	19	29.027	19	29.3992	19	1170000000	0	547000000	0	708000000	0			+	Plus DTT_Minus DTT	5	26.7	26.7	26.7	34.931	0	163.29	4	0	4	0	5	0	Q8I8E0;B1N5G3	2290	>tr|Q8I8E0|Q8I8E0_ENTHI Cysteine protease 8 OS=Entamoeba histolytica OX=5759 GN=CP8 PE=3 SV=1;>tr|B1N5G3|B1N5G3_ENTHI Cysteine proteinase, putative OS=Entamoeba histolytica OX=5759 GN=EHI_010850 PE=3 SV=1
C4M5S0	Uncharacterized protein	EHI_070680	0.0129968	0.0620854	10.515	31.2759	19	30.2077	22.0122	30.0737	19	2600000000	0	1240000000	4230000	1130000000	0					13	32	32	32	56.447	0	89.769	13	0	13	1	13	0	C4M5S0	1561	>tr|C4M5S0|C4M5S0_ENTHI Uncharacterized protein OS=Entamoeba histolytica OX=5759 GN=EHI_070680 PE=4 SV=1
C4LSM1	Ganglioside gm2 activator protein, putative	EHI_151800	0.00211579	0.0487947	10.4249	30.2535	19	29.4314	19	28.5898	19	1280000000	0	724000000	0	404000000	0			+	Plus DTT_Minus DTT	6	47.5	47.5	47.5	19.35	0	58.362	6	0	5	0	6	0	C4LSM1	225	>tr|C4LSM1|C4LSM1_ENTHI Ganglioside gm2 activator protein, putative OS=Entamoeba histolytica OX=5759 GN=EHI_151800 PE=4 SV=1
C4M083	Uncharacterized protein	EHI_004880	0.00143089	0.0487947	10.4115	30.0737	19	29.4512	19	28.7096	19	1130000000	0	734000000	0	439000000	0			+	Plus DTT_Minus DTT	7	19.2	19.2	19.2	28.336	0	15.883	6	0	7	0	5	0	C4M083	1035	>tr|C4M083|C4M083_ENTHI Uncharacterized protein OS=Entamoeba histolytica OX=5759 GN=EHI_004880 PE=3 SV=1
C4MAZ9	N-acetylmuraminidase, putative	EHI_176820	0.0135168	0.0621874	9.92262	32.7985	22.6971	31.5799	23.7594	30.846	19	7470000128	6800000	3209999872	14200000	1930000000	0					11	46	46	46	24.049	0	188.17	10	2	10	3	9	0	C4MAZ9	1993	>tr|C4MAZ9|C4MAZ9_ENTHI N-acetylmuraminidase, putative OS=Entamoeba histolytica OX=5759 GN=EHI_176820 PE=4 SV=1
C4MA90	Uncharacterized protein	EHI_039860	0.0106022	0.0591343	9.69511	31.8385	22.7244	31.4184	23.1015	30.6544	19	3840000000	6930000	2870000128	9000000	1690000000	0					19	51.2	51.2	51.2	48.814	0	222.52	18	2	17	3	16	0	C4MA90	1950	>tr|C4MA90|C4MA90_ENTHI Uncharacterized protein OS=Entamoeba histolytica OX=5759 GN=EHI_039860 PE=4 SV=1
C4M0A5	Uncharacterized protein	EHI_005120	0.00157691	0.0487947	9.63354	29.391	19	28.9146	19.7586	28.3536	19	704000000	0	506000000	887000	343000000	0			+	Plus DTT_Minus DTT	6	16.4	16.4	16.4	42.786	0	14.345	5	0	6	1	5	0	C4M0A5	1040	>tr|C4M0A5|C4M0A5_ENTHI Uncharacterized protein OS=Entamoeba histolytica OX=5759 GN=EHI_005120 PE=3 SV=1
C4M6I5	Uncharacterized protein	EHI_173460	0.00543812	0.0538737	9.50996	29.8916	19	28.0557	19	27.5826	19	996000000	0	279000000	0	201000000	0					12	18.9	18.9	18.9	97.498	0	25.332	11	0	8	0	7	0	C4M6I5	1628	>tr|C4M6I5|C4M6I5_ENTHI Uncharacterized protein OS=Entamoeba histolytica OX=5759 GN=EHI_173460 PE=4 SV=1
C4M6B1;B1N456	Lecithin:cholesterol acyltransferase, putative;1-O-acylceramide synthase, putative (Fragment)	EHI_099180;EHI_079060	0.00224069	0.0487947	9.36983	29.258	19	27.9484	19	27.9031	19	642000000	0	259000000	0	251000000	0			+	Plus DTT_Minus DTT	9	28	28	15.6	46.76	0	22.229	8	0	6	0	6	0	C4M6B1;B1N456	1617	>tr|C4M6B1|C4M6B1_ENTHI Lecithin:cholesterol acyltransferase, putative OS=Entamoeba histolytica OX=5759 GN=EHI_099180 PE=4 SV=1;>tr|B1N456|B1N456_ENTHI 1-O-acylceramide synthase, putative (Fragment) OS=Entamoeba histolytica OX=5759 GN=EHI_079060 PE=4 SV=1
B1N5I9	Rac-like GTP-binding protein RAC2, putative	EHI_013650	0.0558897	0.11245	9.2494	30.9188	19	30.1239	19	29.4649	24.7594	2030000000	0	1170000000	0	741000000	28400000					8	34.7	34.7	34.7	27.619	0	22.416	6	0	6	0	7	2	B1N5I9	172	>tr|B1N5I9|B1N5I9_ENTHI Rac-like GTP-binding protein RAC2, putative OS=Entamoeba histolytica OX=5759 GN=EHI_013650 PE=3 SV=1
C4MB33	Uncharacterized protein	EHI_089460	0.00128004	0.0487947	9.24442	28.5573	19	28.5933	19	27.5826	19	395000000	0	405000000	0	201000000	0			+	Plus DTT_Minus DTT	1	14.4	14.4	14.4	15.626	0.0055036	1.5831	1	0	1	0	1	0	C4MB33	1999	>tr|C4MB33|C4MB33_ENTHI Uncharacterized protein OS=Entamoeba histolytica OX=5759 GN=EHI_089460 PE=4 SV=1
C4LTV9	Uncharacterized protein	EHI_050890	0.000232569	0.0487947	9.22625	29.8127	20.8034	28.49	19	28.1795	19	943000000	1830000	377000000	0	304000000	0			+	Plus DTT_Minus DTT	9	33.4	33.4	33.4	37.444	0	39.444	9	1	7	0	7	0	C4LTV9;B1N3W1	357	>tr|C4LTV9|C4LTV9_ENTHI Uncharacterized protein OS=Entamoeba histolytica OX=5759 GN=EHI_050890 PE=2 SV=1
C4LYB9	Uncharacterized protein	EHI_007470	0.00419404	0.0515364	9.15408	29.3388	19	27.6527	19	27.4707	19	679000000	0	211000000	0	186000000	0	+				1	1.5	1.5	1.5	52.94	1	-2	1	0	1	0	1	0	C4LYB9	842	>tr|C4LYB9|C4LYB9_ENTHI Uncharacterized protein OS=Entamoeba histolytica OX=5759 GN=EHI_007470 PE=4 SV=1
C4LXY2	Uncharacterized protein	EHI_035510	0.00778096	0.0559259	9.13815	29.6233	19	28.6663	20.8346	27.9595	19	827000000	0	426000000	1870000	261000000	0					4	12.6	12.6	12.6	28.658	0	10.776	4	0	3	1	4	0	C4LXY2	805	>tr|C4LXY2|C4LXY2_ENTHI Uncharacterized protein OS=Entamoeba histolytica OX=5759 GN=EHI_035510 PE=2 SV=1
C4LXK3	Carbonic anhydrase	EHI_073380	0.000881685	0.0487947	9.0707	28.5969	19	27.9088	19	27.7064	19	406000000	0	252000000	0	219000000	0			+	Plus DTT_Minus DTT	3	29.3	29.3	29.3	20.625	0	12.144	3	0	3	0	3	0	C4LXK3	777	>tr|C4LXK3|C4LXK3_ENTHI Carbonic anhydrase OS=Entamoeba histolytica OX=5759 GN=EHI_073380 PE=3 SV=1
C4MAA9	PH domain-containing protein	EHI_129520	0.00757807	0.0559259	9.07011	28.5754	19	26.5135	19	29.1214	19	400000000	0	95800000	0	584000000	0					8	8	8	8	145.82	0	17.66	7	0	4	0	4	0	C4MAA9	1951	>tr|C4MAA9|C4MAA9_ENTHI PH domain-containing protein OS=Entamoeba histolytica OX=5759 GN=EHI_129520 PE=4 SV=1
C4M487	Uncharacterized protein	EHI_097870	0.0146036	0.0633714	8.98861	29.8339	20.8876	29.9117	19	29.2535	22.1457	957000000	1940000	1010000000	0	640000000	4640000					7	36	36	36	25.437	0	27.482	6	1	6	0	6	1	C4M487	1433	>tr|C4M487|C4M487_ENTHI Uncharacterized protein OS=Entamoeba histolytica OX=5759 GN=EHI_097870 PE=4 SV=1
C4LVV6	Uncharacterized protein	EHI_125690	0.00214078	0.0487947	8.95225	28.7645	19	27.6931	19	27.3992	19	456000000	0	217000000	0	177000000	0			+	Plus DTT_Minus DTT	9	30.9	30.9	30.9	41.654	0	51.207	9	0	7	0	5	0	C4LVV6	586	>tr|C4LVV6|C4LVV6_ENTHI Uncharacterized protein OS=Entamoeba histolytica OX=5759 GN=EHI_125690 PE=4 SV=1
C4LXF6	Uncharacterized protein	EHI_130880	0.035218	0.0865473	8.9301	31.1724	19	30.0479	21.7348	29.6424	23.3376	2420000000	0	1110000000	3490000	838000000	10600000					17	34.2	34.2	34.2	58.355	0	96.177	17	0	14	1	13	2	C4LXF6;B1N2N0	758	>tr|C4LXF6|C4LXF6_ENTHI Uncharacterized protein OS=Entamoeba histolytica OX=5759 GN=EHI_130880 PE=3 SV=1
C4M701	Uncharacterized protein	EHI_057690	0.0024062	0.0487947	8.92255	28.7129	19	27.1984	19	27.8564	19	440000000	0	154000000	0	243000000	0			+	Plus DTT_Minus DTT	3	14.8	14.8	14.8	34.698	0	15.132	2	0	2	0	3	0	C4M701	1666	>tr|C4M701|C4M701_ENTHI Uncharacterized protein OS=Entamoeba histolytica OX=5759 GN=EHI_057690 PE=4 SV=1
C4LZ82	Uncharacterized protein	EHI_104740	0.00107487	0.0487947	8.90478	28.4823	19	27.6931	19	27.5389	19	375000000	0	217000000	0	195000000	0			+	Plus DTT_Minus DTT	3	23.7	23.7	23.7	21.804	0	63.179	3	0	3	0	3	0	C4LZ82	939	>tr|C4LZ82|C4LZ82_ENTHI Uncharacterized protein OS=Entamoeba histolytica OX=5759 GN=EHI_104740 PE=2 SV=1
C4M2Y3	Ubiquitin-conjugating enzyme family protein	EHI_048700	0.0487423	0.103473	8.86926	30.1361	19	29.6595	19	29.17	24.3578	1180000000	0	848000000	0	604000000	21500000					5	36.4	31.5	31.5	18.616	0	14.364	5	1	5	0	5	2	C4M2Y3	1297	>tr|C4M2Y3|C4M2Y3_ENTHI Ubiquitin-conjugating enzyme family protein OS=Entamoeba histolytica OX=5759 GN=EHI_048700 PE=3 SV=1
B1N4K0	Glucosidase 2 subunit beta	EHI_135420	0.0210122	0.0702577	8.79475	29.9117	19	27.9595	21.5165	28.0296	19	1010000000	0	261000000	3000000	274000000	0					10	29	29	29	48.357	0	73.24	9	0	6	1	7	0	B1N4K0	133	>tr|B1N4K0|B1N4K0_ENTHI Glucosidase 2 subunit beta OS=Entamoeba histolytica OX=5759 GN=EHI_135420 PE=4 SV=1
C4LZT7	Protein phosphatase domain-containing protein	EHI_194220	0.00250037	0.0487947	8.77511	28.17	19	28.258	19	26.8974	19	302000000	0	321000000	0	125000000	0			+	Plus DTT_Minus DTT	4	11.6	11.6	11.6	38.861	0	10.129	4	0	4	0	3	0	C4LZT7	988	>tr|C4LZT7|C4LZT7_ENTHI Protein phosphatase domain-containing protein OS=Entamoeba histolytica OX=5759 GN=EHI_194220 PE=2 SV=1
C4M0D3;B1N5A0	Uncharacterized protein	EHI_064670;EHI_073160	0.0121893	0.0620459	8.75806	30.1724	20.85	29.3452	22.4874	29.094	19	1210000000	1890000	682000000	5880000	573000000	0					6	33.5	33.5	33.5	25.258	0	35.699	6	1	6	1	6	0	C4M0D3;B1N5A0	161	>tr|C4M0D3|C4M0D3_ENTHI Uncharacterized protein OS=Entamoeba histolytica OX=5759 GN=EHI_064670 PE=4 SV=1;>tr|B1N5A0|B1N5A0_ENTHI Uncharacterized protein OS=Entamoeba histolytica OX=5759 GN=EHI_073160 PE=4 SV=1
C4LWF0	Uncharacterized protein	EHI_096370	0.0173625	0.0664316	8.75305	30.0349	19	27.0505	19	26.1738	19	1100000000	0	139000000	0	75700000	0	+				1	1.1	1.1	1.1	115.28	1	-2	1	0	1	0	1	0	C4LWF0	648	>tr|C4LWF0|C4LWF0_ENTHI Uncharacterized protein OS=Entamoeba histolytica OX=5759 GN=EHI_096370 PE=4 SV=1
C4LXA2	Queuosine salvage protein	EHI_098190	0.00794869	0.0559259	8.73009	29.0322	19	27.8324	19	26.3256	19	549000000	0	239000000	0	84100000	0					6	26.9	26.9	26.9	35.891	0	42.895	6	0	6	0	4	0	C4LXA2	735	>tr|C4LXA2|C4LXA2_ENTHI Queuosine salvage protein OS=Entamoeba histolytica OX=5759 GN=EHI_098190 PE=2 SV=1
C4LUR5	Isopentenyl phosphate kinase	EHI_178490	0.0257205	0.075898	8.72133	30.5296	19	30.5109	22.7594	30.0609	23.178	1550000000	0	1530000000	7100000	1120000000	9490000					9	46.3	46.3	46.3	28.49	0	46.317	9	0	9	1	9	1	C4LUR5	461	>tr|C4LUR5|C4LUR5_ENTHI Isopentenyl phosphate kinase OS=Entamoeba histolytica OX=5759 GN=EHI_178490 PE=2 SV=1
B1N4G5	Uncharacterized protein	EHI_107930	0.0141821	0.0628563	8.67394	28.9372	19	28.4823	19	28.1984	21.5961	514000000	0	375000000	0	308000000	3170000					7	39.2	39.2	39.2	22.389	0	28.494	6	0	6	0	6	1	B1N4G5	128	>tr|B1N4G5|B1N4G5_ENTHI Uncharacterized protein OS=Entamoeba histolytica OX=5759 GN=EHI_107930 PE=4 SV=1
C4LVX3	Uncharacterized protein	EHI_125870	0.0123034	0.0620459	8.63724	29.2308	19	27.8445	20.953	27.7895	19	630000000	0	241000000	2030000	232000000	0					8	15.7	15.7	15.7	60.971	0	18.946	8	0	6	1	8	0	C4LVX3	593	>tr|C4LVX3|C4LVX3_ENTHI Uncharacterized protein OS=Entamoeba histolytica OX=5759 GN=EHI_125870 PE=4 SV=1
C4M4W8	Exportin-T	EHI_029040	0.00323246	0.0488391	8.58678	28.1984	19	28.3745	20.7553	27.9428	19	308000000	0	348000000	1770000	258000000	0			+	Plus DTT_Minus DTT	10	14.2	14.2	14.2	105.41	0	120.33	7	0	9	1	8	0	C4M4W8	1489	>tr|C4M4W8|C4M4W8_ENTHI Exportin-T OS=Entamoeba histolytica OX=5759 GN=EHI_029040 PE=3 SV=1
C4LSR0	Uncharacterized protein	EHI_152220	0.00233932	0.0487947	8.57346	31.2814	22.8152	30.9814	21.6409	30.2647	22.3511	2609999872	7380000	2120000000	3270000	1290000000	5350000			+	Plus DTT_Minus DTT	17	40.4	40.4	40.4	58.087	0	128.65	16	3	15	1	13	2	C4LSR0;B1N3E9	239	>tr|C4LSR0|C4LSR0_ENTHI Uncharacterized protein OS=Entamoeba histolytica OX=5759 GN=EHI_152220 PE=4 SV=1
C4LYG2	CXXC-rich protein	EHI_093710	0.0112472	0.0602737	8.51381	30.5296	21.4324	28.5969	21.8689	28.7162	19	1550000000	2830000	406000000	3830000	441000000	0					16	36.5	36.5	36.5	52.926	0	63.296	14	1	10	1	13	0	C4LYG2	853	>tr|C4LYG2|C4LYG2_ENTHI CXXC-rich protein OS=Entamoeba histolytica OX=5759 GN=EHI_093710 PE=2 SV=1
C4LWV6	Lysozyme, putative	EHI_199110	0.0377079	0.0882888	8.47823	28.9316	19	29.4032	19	29.1771	24.0772	512000000	0	710000000	0	607000000	17700000					6	33.6	33.6	33.6	23.561	0	32.022	5	0	6	0	5	1	C4LWV6	694	>tr|C4LWV6|C4LWV6_ENTHI Lysozyme, putative OS=Entamoeba histolytica OX=5759 GN=EHI_199110 PE=3 SV=1
C4LUL8;C4LU31	Thioredoxin, putative	EHI_023060;EHI_068390	0.0102044	0.0587806	8.44029	32.2365	22.0854	31.1842	23.7389	30.5933	22.8689	5059999744	4450000	2440000000	14000000	1620000000	7660000					10	36.1	36.1	36.1	28.846	0	117.28	9	1	10	2	10	1	C4LUL8;C4LU31	384	>tr|C4LUL8|C4LUL8_ENTHI Thioredoxin, putative OS=Entamoeba histolytica OX=5759 GN=EHI_023060 PE=4 SV=1;>tr|C4LU31|C4LU31_ENTHI Thioredoxin, putative OS=Entamoeba histolytica OX=5759 GN=EHI_068390 PE=4 SV=1
C4LV70	RhoGAP domain containing protein	EHI_182930	0.0179394	0.0664714	8.42258	28.6663	19	27.9923	21.8538	28.4629	19	426000000	0	267000000	3790000	370000000	0					5	4.7	4.7	4.7	108.38	0	3.014	1	1	2	2	3	0	C4LV70	505	>tr|C4LV70|C4LV70_ENTHI RhoGAP domain containing protein OS=Entamoeba histolytica OX=5759 GN=EHI_182930 PE=4 SV=1
C4LYN1	Uncharacterized protein	EHI_118830	0.0096812	0.0581655	8.37479	26.533	19	29.0349	19	26.5565	19	97100000	0	550000000	0	98700000	0	+				1	3.6	3.6	3.6	64.161	1	-2	1	0	1	0	1	0	C4LYN1	880	>tr|C4LYN1|C4LYN1_ENTHI Uncharacterized protein OS=Entamoeba histolytica OX=5759 GN=EHI_118830 PE=4 SV=1
C4M284	Uncharacterized protein	EHI_180340	0.00427455	0.0515364	8.36716	28.4629	19	26.8741	19	26.7645	19	370000000	0	123000000	0	114000000	0					3	9.4	9.4	9.4	35.171	0	3.6397	3	0	2	0	2	0	C4M284	1224	>tr|C4M284|C4M284_ENTHI Uncharacterized protein OS=Entamoeba histolytica OX=5759 GN=EHI_180340 PE=4 SV=1
C4LUS9	Uncharacterized protein	EHI_178650	0.00480314	0.0515735	8.27768	28.4113	19	26.8858	19	26.5359	19	357000000	0	124000000	0	97300000	0					6	16.6	16.6	16.6	59.356	0	20.452	6	0	4	0	5	0	C4LUS9	467	>tr|C4LUS9|C4LUS9_ENTHI Uncharacterized protein OS=Entamoeba histolytica OX=5759 GN=EHI_178650 PE=4 SV=1
C4LSW8	Uncharacterized protein	EHI_152850	0.0065524	0.0548842	8.24639	28.4976	19	27.6389	20.4375	27.0401	19	379000000	0	209000000	1420000	138000000	0					6	19.5	19.5	19.5	40.539	0	11.435	6	0	6	1	4	0	C4LSW8	255	>tr|C4LSW8|C4LSW8_ENTHI Uncharacterized protein OS=Entamoeba histolytica OX=5759 GN=EHI_152850 PE=4 SV=1
C4M755	Uncharacterized protein	EHI_083110	0.0186622	0.0674722	8.24558	29.1386	19	27.4073	19	25.1908	19	591000000	0	178000000	0	38300000	0					4	8.4	8.4	8.4	60.553	0	8.6432	4	0	3	0	2	0	C4M755	1685	>tr|C4M755|C4M755_ENTHI Uncharacterized protein OS=Entamoeba histolytica OX=5759 GN=EHI_083110 PE=4 SV=1
C4MAP1	Vesicular integral membrane protein VIP36, putative	EHI_162550	0.0022796	0.0487947	8.20631	27.8142	19	27.3324	19	26.4723	19	236000000	0	169000000	0	93100000	0			+	Plus DTT_Minus DTT	4	7.3	7.3	7.3	47.002	0	3.6753	4	0	4	0	4	0	C4MAP1	1970	>tr|C4MAP1|C4MAP1_ENTHI Vesicular integral membrane protein VIP36, putative OS=Entamoeba histolytica OX=5759 GN=EHI_162550 PE=4 SV=1
C4LUZ2	GPI-anchor transamidase, putative	EHI_092280	0.0763206	0.13786	8.19694	30.2422	19	29.2825	25.8312	28.8974	19	1270000000	0	653000000	59700000	500000000	0					5	22.7	22.7	22.7	34.839	0	24.633	5	0	4	1	4	0	C4LUZ2	479	>tr|C4LUZ2|C4LUZ2_ENTHI GPI-anchor transamidase, putative OS=Entamoeba histolytica OX=5759 GN=EHI_092280 PE=3 SV=1
C4M656	DNA topoisomerase	EHI_042880	0.000114691	0.0487947	8.1616	26.9869	19	27.2535	19	27.2445	19	133000000	0	160000000	0	159000000	0			+	Plus DTT_Minus DTT	7	10.6	10.6	10.6	95.235	0	13.27	4	0	6	0	7	0	C4M656	1602	>tr|C4M656|C4M656_ENTHI DNA topoisomerase OS=Entamoeba histolytica OX=5759 GN=EHI_042880 PE=3 SV=1
C4LSD9	Translation initiation factor 2 beta subunit, putative	EHI_153480	0.00466028	0.0515735	8.15992	28.0084	19	28.0864	20.9812	27.3662	19	270000000	0	285000000	2070000	173000000	0					4	23.9	23.9	23.9	23.065	0	39.624	3	0	4	1	4	0	C4LSD9	197	>tr|C4LSD9|C4LSD9_ENTHI Translation initiation factor 2 beta subunit, putative OS=Entamoeba histolytica OX=5759 GN=EHI_153480 PE=2 SV=1
C4M0T9	Acid sphingomyelinase-like phosphodiesterase, putative	EHI_100080	0.0400001	0.0916343	8.147	29.3023	19	28.3023	19	27.9316	23.0951	662000000	0	331000000	0	256000000	8960000					9	27.6	27.6	27.6	46.223	0	42.804	7	0	8	0	6	2	C4M0T9	1090	>tr|C4M0T9|C4M0T9_ENTHI Acid sphingomyelinase-like phosphodiesterase, putative OS=Entamoeba histolytica OX=5759 GN=EHI_100080 PE=3 SV=1
C4M3U0	Uncharacterized protein	EHI_163590	0.00470866	0.0515735	8.12074	28.17	19	26.9316	19	26.2607	19	302000000	0	128000000	0	80400000	0					7	23.6	23.6	23.6	41.262	0	25.887	7	0	5	0	4	0	C4M3U0	1388	>tr|C4M3U0|C4M3U0_ENTHI Uncharacterized protein OS=Entamoeba histolytica OX=5759 GN=EHI_163590 PE=4 SV=1
C4LT46	Uncharacterized protein	EHI_148780	0.00411804	0.0515364	8.11213	27.8564	19	27.3745	19	26.1055	19	243000000	0	174000000	0	72200000	0					8	15.2	15.2	15.2	70.572	0	11.645	7	0	6	0	3	0	C4LT46	284	>tr|C4LT46|C4LT46_ENTHI Uncharacterized protein OS=Entamoeba histolytica OX=5759 GN=EHI_148780 PE=4 SV=1
C4LYL5	Uncharacterized protein	EHI_118650	0.00184488	0.0487947	8.10045	27.6251	19	27.2353	19	26.4409	19	207000000	0	158000000	0	91100000	0	+		+	Plus DTT_Minus DTT	1	6.9	6.9	6.9	22.239	1	-2	1	0	1	0	1	0	C4LYL5	873	>tr|C4LYL5|C4LYL5_ENTHI Uncharacterized protein OS=Entamoeba histolytica OX=5759 GN=EHI_118650 PE=4 SV=1
C4M7E3	Uncharacterized protein	EHI_166360	0.0111967	0.0602737	8.09518	29.4354	20.8034	28.249	19	27.9259	21.5213	726000000	1830000	319000000	0	255000000	3010000					9	25.8	25.8	25.8	40.765	0	22.638	6	1	7	1	7	1	C4M7E3;C4LTN3;C4M6K4	1710	>tr|C4M7E3|C4M7E3_ENTHI Uncharacterized protein OS=Entamoeba histolytica OX=5759 GN=EHI_166360 PE=4 SV=1
C4M0P5	Uncharacterized protein	EHI_008810	0.00816349	0.0559259	8.08943	28.509	19	26.7129	19	26.0464	19	382000000	0	110000000	0	69300000	0					5	17.5	17.5	17.5	45.174	0	18.645	5	0	3	0	3	0	C4M0P5	1082	>tr|C4M0P5|C4M0P5_ENTHI Uncharacterized protein OS=Entamoeba histolytica OX=5759 GN=EHI_008810 PE=4 SV=1
C4M803	Uncharacterized protein	EHI_143570	0.00578307	0.05403	8.07545	27.3239	19	28.0505	21.1457	27.9977	19	168000000	0	278000000	2320000	268000000	0					5	28.6	28.6	28.6	21.226	0	7.6425	4	0	5	1	5	0	C4M803	1758	>tr|C4M803|C4M803_ENTHI Uncharacterized protein OS=Entamoeba histolytica OX=5759 GN=EHI_143570 PE=4 SV=1
C4LSG7	Protein RFT1 homolog	EHI_151240	0.00540802	0.0538737	8.06169	28.0453	19	27.1507	19	25.989	19	277000000	0	149000000	0	66600000	0					5	11.5	11.5	11.5	56.769	0	13.548	4	0	5	0	4	0	C4LSG7	208	>tr|C4LSG7|C4LSG7_ENTHI Protein RFT1 homolog OS=Entamoeba histolytica OX=5759 GN=EHI_151240 PE=3 SV=1
C4M2W5	Uncharacterized protein	EHI_188980	0.00152005	0.0487947	8.01507	27.5754	19	26.976	19	26.4938	19	200000000	0	132000000	0	94500000	0			+	Plus DTT_Minus DTT	6	13.9	13.9	13.9	56.016	0	18.586	5	0	6	0	4	0	C4M2W5	1291	>tr|C4M2W5|C4M2W5_ENTHI Uncharacterized protein OS=Entamoeba histolytica OX=5759 GN=EHI_188980 PE=4 SV=1
C4M382;C4M9S1	Uncharacterized protein	EHI_106070;EHI_128470	0.00547919	0.0539911	7.97245	28.1115	19	26.6865	19	26.1194	19	290000000	0	108000000	0	72900000	0					5	18.2	18.2	18.2	34.443	0	14.961	5	0	3	0	3	0	C4M382;C4M9S1	1324	>tr|C4M382|C4M382_ENTHI Uncharacterized protein OS=Entamoeba histolytica OX=5759 GN=EHI_106070 PE=4 SV=1;>tr|C4M9S1|C4M9S1_ENTHI Uncharacterized protein OS=Entamoeba histolytica OX=5759 GN=EHI_128470 PE=4 SV=1
Q5FMN8	Glutamine ABC transporter ATP-binding protein	glnQ	0.0142967	0.0628563	7.95492	28.3704	19	27.3745	19	27.189	21.0691	347000000	0	174000000	0	153000000	2200000	+				1	2.9	2.9	2.9	27.015	1	-2	1	0	1	0	1	1	Q5FMN8	2245	>tr|Q5FMN8|Q5FMN8_LACAC Glutamine ABC transporter ATP-binding protein OS=Lactobacillus acidophilus (strain ATCC 700396 / NCK56 / N2 / NCFM) OX=272621 GN=glnQ PE=4 SV=1
C4M0T6	MIR domain protein	EHI_100480	0.0221315	0.0720267	7.94328	28.7645	19	27.509	21.8346	27.391	19	456000000	0	191000000	3740000	176000000	0					4	21.8	21.8	21.8	23.449	0	8.2585	3	0	2	1	4	0	C4M0T6	1088	>tr|C4M0T6|C4M0T6_ENTHI MIR domain protein OS=Entamoeba histolytica OX=5759 GN=EHI_100480 PE=4 SV=1
C4M0J1	Phosphatidate cytidylyltransferase, putative	EHI_024490	0.0043158	0.0515364	7.90926	27.6181	19	27.217	19	25.8927	19	206000000	0	156000000	0	62300000	0					1	16.1	5.7	5.7	25.686	0	8.9132	1	0	1	0	1	0	C4M0J1	1069	>tr|C4M0J1|C4M0J1_ENTHI Phosphatidate cytidylyltransferase, putative OS=Entamoeba histolytica OX=5759 GN=EHI_024490 PE=2 SV=1
C4LX23	RhoGAP domain containing protein	EHI_159300	0.00765403	0.0559259	7.89429	27.8504	19	27.2891	19	25.5433	19	242000000	0	164000000	0	48900000	0					5	8.3	8.3	8.3	69.328	0	8.6424	3	0	4	0	2	0	C4LX23	719	>tr|C4LX23|C4LX23_ENTHI RhoGAP domain containing protein OS=Entamoeba histolytica OX=5759 GN=EHI_159300 PE=4 SV=1
C4LXH3	Uncharacterized protein	EHI_131050	0.00257411	0.0487947	7.88483	27.509	19	27.0084	19	26.1371	19	191000000	0	135000000	0	73800000	0			+	Plus DTT_Minus DTT	4	10.4	10.4	10.4	51.628	0	13.768	3	0	4	0	3	0	C4LXH3	766	>tr|C4LXH3|C4LXH3_ENTHI Uncharacterized protein OS=Entamoeba histolytica OX=5759 GN=EHI_131050 PE=2 SV=1
C4LZE7	Uncharacterized protein	EHI_137860	0.00349854	0.0492489	7.87385	26.8385	19	27.6998	19	26.0833	19	120000000	0	218000000	0	71100000	0	+		+	Plus DTT_Minus DTT	1	6.4	6.4	6.4	20.208	1	-2	1	0	1	0	1	0	C4LZE7	952	>tr|C4LZE7|C4LZE7_ENTHI Uncharacterized protein OS=Entamoeba histolytica OX=5759 GN=EHI_137860 PE=3 SV=1
C4LSN2	Uncharacterized protein	EHI_151930	0.00645746	0.0548842	7.86588	31.2591	22.5708	30.5296	23.9134	30.1239	21.8307	2569999872	6230000	1550000000	15800000	1170000000	3730000					12	38	38	38	33.763	0	114.04	10	3	10	3	12	1	C4LSN2	229	>tr|C4LSN2|C4LSN2_ENTHI Uncharacterized protein OS=Entamoeba histolytica OX=5759 GN=EHI_151930 PE=2 SV=1
C4M400	Uncharacterized protein	EHI_194850	0.0489668	0.103796	7.82517	30.8157	22.8987	29.0889	24.4234	29.893	19	1890000000	7820000	571000000	22500000	997000000	0					10	22.8	22.8	22.8	61.541	0	83.585	8	1	7	2	10	1	C4M400	1407	>tr|C4M400|C4M400_ENTHI Uncharacterized protein OS=Entamoeba histolytica OX=5759 GN=EHI_194850 PE=4 SV=1
C4LZE3	Uncharacterized protein	EHI_137800	0.0105421	0.0591343	7.79228	28.3992	19	26.8974	20.0292	26.1095	19	354000000	0	125000000	1070000	72400000	0					6	14.5	14.5	14.5	56.661	0	13.313	6	0	4	1	3	0	C4LZE3	951	>tr|C4LZE3|C4LZE3_ENTHI Uncharacterized protein OS=Entamoeba histolytica OX=5759 GN=EHI_137800 PE=4 SV=1
C4M7R2	Uncharacterized protein	EHI_079180	0.0256506	0.075898	7.78668	29.2422	19	28.2216	21.0886	27.7645	21.7796	635000000	0	313000000	2230000	228000000	3600000					5	11.3	11.3	11.3	40.232	0	9.0665	5	0	4	1	4	1	C4M7R2	1736	>tr|C4M7R2|C4M7R2_ENTHI Uncharacterized protein OS=Entamoeba histolytica OX=5759 GN=EHI_079180 PE=2 SV=1
C4LSA2;B1N2E0;C4M7Y8	Alpha-amylase, putative;Beta/alpha-amylase, putative	EHI_153100;EHI_153590	0.00940494	0.056812	7.77458	27.632	19	27.8564	21.5961	27.4314	19	208000000	0	243000000	3170000	181000000	0					8	20.5	20.5	20.5	52.93	0	14.207	6	0	6	1	4	0	C4LSA2;B1N2E0;C4M7Y8;B1N605	5	>tr|C4LSA2|C4LSA2_ENTHI Alpha-amylase, putative OS=Entamoeba histolytica OX=5759 GN=EHI_153100 PE=4 SV=1;>tr|B1N2E0|B1N2E0_ENTHI Beta/alpha-amylase, putative OS=Entamoeba histolytica OX=5759 GN=EHI_153590 PE=4 SV=1;>tr|C4M7Y8|C4M7Y8_ENTHI Alpha-amylase, pu
C4MAJ8	Ribonuclease, putative	EHI_160710	0.000931268	0.0487947	7.77346	27.2445	19	26.4862	19	26.5898	19	159000000	0	94000000	0	101000000	0			+	Plus DTT_Minus DTT	3	21.8	14.5	14.5	27.802	0	6.7131	3	0	2	0	3	0	C4MAJ8	1962	>tr|C4MAJ8|C4MAJ8_ENTHI Ribonuclease, putative OS=Entamoeba histolytica OX=5759 GN=EHI_160710 PE=3 SV=1
C4LWA7	Uncharacterized protein	EHI_155560	0.000859392	0.0487947	7.76762	27.17	19	26.7517	19	26.3811	19	151000000	0	113000000	0	87400000	0			+	Plus DTT_Minus DTT	3	13.3	13.3	13.3	35.757	0	11.421	2	0	2	0	2	0	C4LWA7	633	>tr|C4LWA7|C4LWA7_ENTHI Uncharacterized protein OS=Entamoeba histolytica OX=5759 GN=EHI_155560 PE=4 SV=1
C4M0J5	Uncharacterized protein	EHI_024530	0.00444121	0.0515364	7.76067	31.7373	23.9134	31.4433	22.8171	30.7453	23.9134	3580000000	15800000	2920000000	7390000	1800000000	15800000					11	45.2	45.2	45.2	36.638	0	143.09	9	2	11	1	9	2	C4M0J5	1071	>tr|C4M0J5|C4M0J5_ENTHI Uncharacterized protein OS=Entamoeba histolytica OX=5759 GN=EHI_024530 PE=2 SV=1
Q5FKN0	Beta-glucosidase	LBA0885	0.00413434	0.0515364	7.75414	32.4408	23.6865	32.2897	25.0401	31.781	24.5225	5830000128	13500000	5249999872	34500000	3689999872	24100000	+				1	2.4	2.4	2.4	53.88	1	-2	1	1	1	1	1	1	Q5FKN0	2224	>tr|Q5FKN0|Q5FKN0_LACAC Beta-glucosidase OS=Lactobacillus acidophilus (strain ATCC 700396 / NCK56 / N2 / NCFM) OX=272621 GN=LBA0885 PE=3 SV=1
C4LU53	HEAT repeat domain containing protein	EHI_068630	0.0129156	0.0620854	7.75083	29.104	22.8423	30.9045	23.2521	30.5389	21.2006	577000000	7520000	2010000000	9990000	1560000000	2410000					10	19.2	19.2	19.2	63.603	0	14.728	9	2	8	3	7	1	C4LU53;B1N2K9	391	>tr|C4LU53|C4LU53_ENTHI HEAT repeat domain containing protein OS=Entamoeba histolytica OX=5759 GN=EHI_068630 PE=4 SV=1
C4M9S0	Leucine rich repeat protein, BspA family	EHI_128460	0.00100609	0.0487947	7.74505	26.2696	19	27.0914	19	26.8741	19	80900000	0	143000000	0	123000000	0			+	Plus DTT_Minus DTT	4	28.3	22.8	19.8	27.444	0	8.1157	1	0	4	0	4	0	C4M9S0	1911	>tr|C4M9S0|C4M9S0_ENTHI Leucine rich repeat protein, BspA family OS=Entamoeba histolytica OX=5759 GN=EHI_128460 PE=4 SV=1
C4LZM9	Uncharacterized protein	EHI_175040	0.00447666	0.0515364	7.72997	27.7389	19	26.4362	19	26.0148	19	224000000	0	90800000	0	67800000	0					4	7.2	7.2	7.2	66.705	0	7.9503	4	0	3	0	3	0	C4LZM9	976	>tr|C4LZM9|C4LZM9_ENTHI Uncharacterized protein OS=Entamoeba histolytica OX=5759 GN=EHI_175040 PE=4 SV=1
C4M2N7	Deoxyhypusine synthase, putative	EHI_006030	0.00292291	0.0488391	7.71814	27.524	19	26.509	19	26.1214	19	193000000	0	95500000	0	73000000	0			+	Plus DTT_Minus DTT	1	7.4	7.4	7.4	37.397	0	13.163	1	0	1	0	1	0	C4M2N7	1264	>tr|C4M2N7|C4M2N7_ENTHI Deoxyhypusine synthase, putative OS=Entamoeba histolytica OX=5759 GN=EHI_006030 PE=2 SV=1
C4M0Y9	Uncharacterized protein	EHI_135020	0.000717188	0.0487947	7.70017	27.0914	19	26.6181	19	26.391	19	143000000	0	103000000	0	88000000	0			+	Plus DTT_Minus DTT	3	8.6	8.6	8.6	40.046	0	8.8095	3	0	3	0	3	0	C4M0Y9	1103	>tr|C4M0Y9|C4M0Y9_ENTHI Uncharacterized protein OS=Entamoeba histolytica OX=5759 GN=EHI_135020 PE=3 SV=1
C4M363	Proteasome alpha subunit, putative	EHI_086080	0.0132497	0.0621874	7.69762	29.1556	22.5045	29.4234	22.4601	28.4785	19	598000000	5950000	720000000	5770000	374000000	0					10	51.4	51.4	51.4	28.119	0	113.93	6	1	9	2	9	1	C4M363	1320	>tr|C4M363|C4M363_ENTHI Proteasome alpha subunit, putative OS=Entamoeba histolytica OX=5759 GN=EHI_086080 PE=3 SV=1
C4M4A8	Protein transport protein SEC61 gamma subunit, putative	EHI_048170	0.0138379	0.0625652	7.66959	25.5926	19	28.4823	19	25.9338	19	50600000	0	375000000	0	64100000	0					1	30.4	30.4	30.4	8.0024	0	33.073	1	0	1	0	1	0	C4M4A8	1439	>tr|C4M4A8|C4M4A8_ENTHI Protein transport protein SEC61 gamma subunit, putative OS=Entamoeba histolytica OX=5759 GN=EHI_048170 PE=3 SV=1
C4LSJ9	Uncharacterized protein	EHI_151580	0.0157222	0.0650182	7.64701	29.4976	20.7056	27.9595	22.2419	27.4314	19	758000000	1710000	261000000	4960000	181000000	0					8	19.8	19.8	19.8	48.822	0	38.443	8	1	6	1	7	0	C4LSJ9	220	>tr|C4LSJ9|C4LSJ9_ENTHI Uncharacterized protein OS=Entamoeba histolytica OX=5759 GN=EHI_151580 PE=4 SV=1
C4M0Z8	Uncharacterized protein	EHI_135120	0.0220476	0.0720267	7.64644	29.94	23.0821	29.1459	22.9847	28.9203	19	1030000000	8880000	594000000	8300000	508000000	0	+				1	1.5	1.5	1.5	77.504	1	-2	1	1	1	1	1	0	C4M0Z8	1107	>tr|C4M0Z8|C4M0Z8_ENTHI Uncharacterized protein OS=Entamoeba histolytica OX=5759 GN=EHI_135120 PE=4 SV=1
C4LZZ3	Heat shock protein 70, putative	EHI_065770	0.00307523	0.0488391	7.61309	27.4073	19	26.4692	19	25.9628	19	178000000	0	92900000	0	65400000	0			+	Plus DTT_Minus DTT	3	5.2	5.2	5.2	60.473	0	5.1468	3	0	3	0	2	0	C4LZZ3	1006	>tr|C4LZZ3|C4LZZ3_ENTHI Heat shock protein 70, putative OS=Entamoeba histolytica OX=5759 GN=EHI_065770 PE=3 SV=1
C4LVW5	Sphingomyelin phosphodiesterase	EHI_125790	0.00248016	0.0487947	7.60015	27.3578	19	26.1927	19	26.2499	19	172000000	0	76700000	0	79800000	0			+	Plus DTT_Minus DTT	3	8.4	8.4	8.4	36.989	0	4.5199	3	0	2	0	2	0	C4LVW5	590	>tr|C4LVW5|C4LVW5_ENTHI Sphingomyelin phosphodiesterase OS=Entamoeba histolytica OX=5759 GN=EHI_125790 PE=4 SV=1
C4LZ91	Uncharacterized protein	EHI_000280	0.0481447	0.102818	7.59225	30.0084	19	29.1015	22.7533	28.8112	23.391	1080000000	0	576000000	7070000	471000000	11000000					15	34.7	34.7	34.7	42.507	0	34.549	15	0	14	3	12	2	C4LZ91	940	>tr|C4LZ91|C4LZ91_ENTHI Uncharacterized protein OS=Entamoeba histolytica OX=5759 GN=EHI_000280 PE=4 SV=1
C4LT61	Uncharacterized protein	EHI_148940	0.00383052	0.0496409	7.59052	27.4938	19	26.3712	19	25.9066	19	189000000	0	86800000	0	62900000	0			+	Plus DTT_Minus DTT	2	5.6	5.6	5.6	59.269	0	11.849	2	0	1	0	1	0	C4LT61	290	>tr|C4LT61|C4LT61_ENTHI Uncharacterized protein OS=Entamoeba histolytica OX=5759 GN=EHI_148940 PE=4 SV=1
C4LSA7	RhoGAP domain containing protein	EHI_153150	0.0042641	0.0515364	7.58909	27.3153	19	27.8203	21.1825	26.8142	19	167000000	0	237000000	2380000	118000000	0					5	9.7	9.7	9.7	62.805	0	9.8675	3	0	5	1	4	0	C4LSA7	186	>tr|C4LSA7|C4LSA7_ENTHI RhoGAP domain containing protein OS=Entamoeba histolytica OX=5759 GN=EHI_153150 PE=4 SV=1
B1N345;B1N2N5	Signal recognition particle receptor subunit beta	EHI_000670;EHI_092570	0.00981601	0.0584923	7.5876	27.8019	19	27.391	21.1946	26.7645	19	234000000	0	176000000	2400000	114000000	0					6	25.8	25.8	25.8	26.355	0	14.968	5	0	5	1	4	0	B1N345;B1N2N5	25	>tr|B1N345|B1N345_ENTHI Signal recognition particle receptor subunit beta OS=Entamoeba histolytica OX=5759 GN=EHI_000670 PE=3 SV=1;>tr|B1N2N5|B1N2N5_ENTHI Signal recognition particle receptor subunit beta OS=Entamoeba histolytica OX=5759 GN=EHI_092570 PE=3
C4M906	Component of oligomeric Golgi complex 3	EHI_147890	0.0256705	0.075898	7.58653	28.9732	20.7471	28.4746	23.2821	28.341	19	527000000	1760000	373000000	10200000	340000000	0					12	22.9	22.9	22.9	67.076	0	29.27	9	1	11	2	11	0	C4M906	1850	>tr|C4M906|C4M906_ENTHI Component of oligomeric Golgi complex 3 OS=Entamoeba histolytica OX=5759 GN=EHI_147890 PE=3 SV=1
C4M8Z4	Vacuolar protein sorting 35, putative	EHI_086580	0.0127063	0.0620854	7.57985	28.0762	19	26.9977	20.9098	26.5754	19	283000000	0	134000000	1970000	100000000	0					7	10.6	10.6	10.6	77.514	0	13.939	6	0	5	1	5	0	C4M8Z4	1848	>tr|C4M8Z4|C4M8Z4_ENTHI Vacuolar protein sorting 35, putative OS=Entamoeba histolytica OX=5759 GN=EHI_086580 PE=3 SV=1
Q53UB0;B1N392	Vacuolar protein sorting 26;Vacuolar sorting protein 26, putative (Fragment)	EhVPS26;EHI_008470	0.0217421	0.0715851	7.56075	30.6713	20.9812	30.5203	23.3511	29.8249	24.002	1710000000	2070000	1540000000	10700000	951000000	16800000					14	37.8	37.8	37.8	47.978	0	205.44	10	1	14	2	11	2	Q53UB0;B1N392	2193	>tr|Q53UB0|Q53UB0_ENTHI Vacuolar protein sorting 26 OS=Entamoeba histolytica OX=5759 GN=EhVPS26 PE=3 SV=1;>tr|B1N392|B1N392_ENTHI Vacuolar sorting protein 26, putative (Fragment) OS=Entamoeba histolytica OX=5759 GN=EHI_008470 PE=3 SV=1
C4LT00	Uncharacterized protein	EHI_148300	0.00757516	0.0559259	7.5221	27.7325	19	26.3662	19	25.4676	19	223000000	0	86500000	0	46400000	0					1	2.1	2.1	2.1	55.938	0.0089474	1.3207	1	0	1	0	1	0	C4LT00	268	>tr|C4LT00|C4LT00_ENTHI Uncharacterized protein OS=Entamoeba histolytica OX=5759 GN=EHI_148300 PE=4 SV=1
C4LTV0	Uncharacterized protein	EHI_050800	0.00275953	0.0487947	7.50916	30.7292	23.0951	30.2869	22.1642	29.995	23.2243	1780000000	8960000	1310000000	4700000	1070000000	9800000			+	Plus DTT_Minus DTT	15	32.8	32.8	32.8	64.5	0	112.68	14	2	15	1	13	2	C4LTV0	355	>tr|C4LTV0|C4LTV0_ENTHI Uncharacterized protein OS=Entamoeba histolytica OX=5759 GN=EHI_050800 PE=4 SV=1
C4M894	Uncharacterized protein	EHI_076250	0.007962	0.0559259	7.50398	27.7389	19	26.3528	19	25.4202	19	224000000	0	85700000	0	44900000	0					6	18.9	18.9	18.9	45.207	0	10.276	6	0	4	0	3	0	C4M894	1774	>tr|C4M894|C4M894_ENTHI Uncharacterized protein OS=Entamoeba histolytica OX=5759 GN=EHI_076250 PE=4 SV=1
Q1EQ54	ADP-ribosylation factor, putative (Fragment)	EHI_092730	0.0298339	0.0801644	7.49967	28.726	19	24.141	19	26.632	19	444000000	0	18500000	0	104000000	0					2	14.2	14.2	14.2	20.397	0	2.9101	2	0	1	0	1	0	Q1EQ54	2179	>tr|Q1EQ54|Q1EQ54_ENTHI ADP-ribosylation factor, putative (Fragment) OS=Entamoeba histolytica OX=5759 GN=EHI_092730 PE=3 SV=1
C4M1U3	Thioredoxin, putative	EHI_027550	0.00871008	0.0559259	7.49024	31.9259	23.155	31.1783	24.8336	30.6372	23.2821	4080000000	9340000	2430000128	29900000	1670000000	10200000					20	58	58	58	35.196	0	174.34	17	2	17	3	16	2	C4M1U3	1190	>tr|C4M1U3|C4M1U3_ENTHI Thioredoxin, putative OS=Entamoeba histolytica OX=5759 GN=EHI_027550 PE=2 SV=1
C4M955	Ras GTPase-activating protein, putative	EHI_139970	0.00196039	0.0487947	7.48134	27.0813	19	25.9361	19	26.4266	19	142000000	0	64200000	0	90200000	0			+	Plus DTT_Minus DTT	6	15.9	15.9	15.9	57.094	0	25.537	5	0	4	0	6	0	C4M955	1867	>tr|C4M955|C4M955_ENTHI Ras GTPase-activating protein, putative OS=Entamoeba histolytica OX=5759 GN=EHI_139970 PE=4 SV=1
C4M306	Uncharacterized protein	EHI_074170	0.00896564	0.0559259	7.46811	27.8081	19	26.2151	19	25.3811	19	235000000	0	77900000	0	43700000	0					5	10.1	10.1	10.1	61.989	0	11.521	5	0	3	0	2	0	C4M306	1305	>tr|C4M306|C4M306_ENTHI Uncharacterized protein OS=Entamoeba histolytica OX=5759 GN=EHI_074170 PE=4 SV=1
C4M4Z7	Ubiquitin carboxyl-terminal hydrolase family protein	EHI_035180	0.00377444	0.0496409	7.46225	27.3494	19	26.228	19	25.8093	19	171000000	0	78600000	0	58800000	0			+	Plus DTT_Minus DTT	5	6.1	6.1	6.1	93.299	0	17.159	4	0	4	0	4	0	C4M4Z7	1494	>tr|C4M4Z7|C4M4Z7_ENTHI Ubiquitin carboxyl-terminal hydrolase family protein OS=Entamoeba histolytica OX=5759 GN=EHI_035180 PE=4 SV=1
C4M8X0	Uncharacterized protein	EHI_120590	0.00803486	0.0559259	7.43378	31.0927	22.5685	31.0927	23.5285	30.5573	24.3444	2289999872	6220000	2289999872	12100000	1580000000	21300000					21	25.2	25.2	25.2	86.873	0	117.25	18	3	20	2	19	7	C4M8X0	1840	>tr|C4M8X0|C4M8X0_ENTHI Uncharacterized protein OS=Entamoeba histolytica OX=5759 GN=EHI_120590 PE=4 SV=1
C4M2B0	Uncharacterized protein	EHI_136410	0.000919207	0.0487947	7.41124	26.7129	19	26.5492	19	25.9716	19	110000000	0	98200000	0	65800000	0	+		+	Plus DTT_Minus DTT	1	3	3	3	35.393	1	-2	1	0	1	0	1	0	C4M2B0	1232	>tr|C4M2B0|C4M2B0_ENTHI Uncharacterized protein OS=Entamoeba histolytica OX=5759 GN=EHI_136410 PE=4 SV=1
C4M1I0	Uncharacterized protein	EHI_192630	0.00851741	0.0559259	7.40815	27.524	19	26.5478	19	25.1527	19	193000000	0	98100000	0	37300000	0					5	10.1	10.1	10.1	63.274	0	9.0203	5	0	4	0	3	0	C4M1I0	1155	>tr|C4M1I0|C4M1I0_ENTHI Uncharacterized protein OS=Entamoeba histolytica OX=5759 GN=EHI_192630 PE=3 SV=1
C4M8P8	DH domain-containing protein	EHI_053620	0.00237101	0.0487947	7.40775	27.1115	19	26.1984	19	25.9134	19	145000000	0	77000000	0	63200000	0			+	Plus DTT_Minus DTT	4	9.1	9.1	9.1	43.443	0	4.6373	4	0	2	0	2	0	C4M8P8	1818	>tr|C4M8P8|C4M8P8_ENTHI DH domain-containing protein OS=Entamoeba histolytica OX=5759 GN=EHI_053620 PE=4 SV=1
C4MAX9	Iron-sulfur flavoprotein, putative	EHI_025710	0.0191611	0.0685111	7.38669	28.3494	19	27.1214	21.2989	27.1214	20.1332	342000000	0	146000000	2580000	146000000	1150000					6	26.6	26.6	26.6	21.439	0	27.938	6	0	4	1	3	1	C4MAX9	1989	>tr|C4MAX9|C4MAX9_ENTHI Iron-sulfur flavoprotein, putative OS=Entamoeba histolytica OX=5759 GN=EHI_025710 PE=4 SV=1
C4M5G9	Galactose-inhibitable lectin, putative	EHI_058330	0.0123964	0.0620854	7.38602	28.0243	19	25.7995	19	27.4862	21.1519	273000000	0	58400000	0	188000000	2330000					4	48.3	18.1	18.1	31.626	0	63.418	4	0	3	0	4	1	C4M5G9	1538	>tr|C4M5G9|C4M5G9_ENTHI Galactose-inhibitable lectin, putative OS=Entamoeba histolytica OX=5759 GN=EHI_058330 PE=2 SV=1
C4MAD9	Uncharacterized protein	EHI_058920	0.00358297	0.049299	7.37739	27.1795	19	26.3014	19	25.6513	19	152000000	0	82700000	0	52700000	0			+	Plus DTT_Minus DTT	3	11.1	11.1	11.1	35.316	0	8.3069	3	0	2	0	1	0	C4MAD9	1956	>tr|C4MAD9|C4MAD9_ENTHI Uncharacterized protein OS=Entamoeba histolytica OX=5759 GN=EHI_058920 PE=2 SV=1
C4LWY9	Ribonuclease, putative	EHI_127160	0.0673658	0.127112	7.3765	29.1312	19	27.7958	24.3511	27.5536	19	588000000	0	233000000	21400000	197000000	0					6	15.9	15.9	15.9	28.221	0	11.406	5	0	6	1	6	0	C4LWY9	708	>tr|C4LWY9|C4LWY9_ENTHI Ribonuclease, putative OS=Entamoeba histolytica OX=5759 GN=EHI_127160 PE=3 SV=1
B1N539;C4LY26;C4MB42;B1N4I4;B1N433;C4M6E2	Aurora kinase	EHI_033850;EHI_177010	0.000613401	0.0487947	7.36995	26.1214	19	26.2625	19	26.726	19	73000000	0	80500000	0	111000000	0			+	Plus DTT_Minus DTT	4	15.9	15.9	15.9	34.823	0	9.4384	2	0	3	0	4	0	B1N539;C4LY26;C4MB42;B1N4I4;B1N433;C4M6E2	155	>tr|B1N539|B1N539_ENTHI Aurora kinase OS=Entamoeba histolytica OX=5759 GN=EHI_033850 PE=3 SV=1;>tr|C4LY26|C4LY26_ENTHI Aurora kinase OS=Entamoeba histolytica OX=5759 GN=EHI_177010 PE=3 SV=1;>tr|C4MB42|C4MB42_ENTHI Aurora kinase OS=Entamoeba histolytica OX=
C4M3L9	Protein kinase, putative	EHI_110010	0.014903	0.0639589	7.3492	29.003	22.4067	28.1556	19	28.4194	22.1238	538000000	5560000	299000000	0	359000000	4570000					7	12.7	12.7	12.7	61.177	0	12.633	5	2	7	0	6	1	C4M3L9;B1N4B3	1359	>tr|C4M3L9|C4M3L9_ENTHI Protein kinase, putative OS=Entamoeba histolytica OX=5759 GN=EHI_110010 PE=4 SV=1
Q01958	Histolysain	CPP2	0.0140657	0.062705	7.34038	35.2931	26.2225	34.3502	27.5969	33.3956	27.1984	42099998720	78300000	21899999232	203000000	11299999744	154000000					29	79.7	79.7	74.9	34.688	0	323.31	28	7	27	8	24	6	Q01958	2147	>sp|Q01958|CPP2_ENTHI Histolysain OS=Entamoeba histolytica OX=5759 GN=CPP2 PE=1 SV=1
C4LSZ9	Thiamine diphosphokinase	EHI_148290	0.01086	0.060067	7.32758	27.3494	19	26.8142	19	24.8191	19	171000000	0	118000000	0	29600000	0					2	13.2	13.2	13.2	24.593	0	3.5432	2	0	2	0	1	0	C4LSZ9	267	>tr|C4LSZ9|C4LSZ9_ENTHI Thiamine diphosphokinase OS=Entamoeba histolytica OX=5759 GN=EHI_148290 PE=4 SV=1
C4MBF1	Uncharacterized protein	EHI_165770	0.00205884	0.0487947	7.30513	27.3324	20.6186	26.8623	19	26.3393	19	169000000	1610000	122000000	0	84900000	0			+	Plus DTT_Minus DTT	5	30.3	30.3	30.3	23.35	0	15.913	5	1	3	0	3	0	C4MBF1	2024	>tr|C4MBF1|C4MBF1_ENTHI Uncharacterized protein OS=Entamoeba histolytica OX=5759 GN=EHI_165770 PE=4 SV=1
C4M7W7	Cytosolic Fe-S cluster assembly factor NUBP1 homolog	EHI_047750	0.0118748	0.0618434	7.30071	32.005	23.0999	30.8234	24.275	30.362	23.9134	4310000128	8990000	1900000000	20300000	1380000000	15800000					13	49.2	49.2	49.2	35.931	0	88.954	12	1	11	3	12	2	C4M7W7	1749	>tr|C4M7W7|C4M7W7_ENTHI Cytosolic Fe-S cluster assembly factor NUBP1 homolog OS=Entamoeba histolytica OX=5759 GN=EHI_047750 PE=3 SV=1
C4LY29;B1N564;B1N518;B1N3A2	Uncharacterized protein	EHI_177040;EHI_101420	0.000666209	0.0487947	7.29837	26.0752	19	26.673	19	26.1469	19	70700000	0	107000000	0	74300000	0			+	Plus DTT_Minus DTT	1	2.9	2.9	2.9	27.702	0.0099217	1.2784	1	0	1	0	1	0	C4LY29;B1N564;B1N518;B1N3A2	65	>tr|C4LY29|C4LY29_ENTHI Uncharacterized protein OS=Entamoeba histolytica OX=5759 GN=EHI_177040 PE=4 SV=1;>tr|B1N564|B1N564_ENTHI Uncharacterized protein OS=Entamoeba histolytica OX=5759 GN=EHI_101420 PE=4 SV=1;>tr|B1N518|B1N518_ENTHI Uncharacterized protei
C4M2E0	Uncharacterized protein	EHI_158210	0.0579553	0.114931	7.28816	29.9539	19	28.4394	22.821	27.8974	22.6051	1040000000	0	364000000	7410000	250000000	6380000	+				1	3.8	3.8	3.8	28.353	1	-2	1	0	1	1	1	1	C4M2E0	1237	>tr|C4M2E0|C4M2E0_ENTHI Uncharacterized protein OS=Entamoeba histolytica OX=5759 GN=EHI_158210 PE=4 SV=1
C4LUA2	Uncharacterized protein	EHI_110530	0.0128333	0.0620854	7.27435	29.1724	20.3645	28.7389	21.6714	28.3282	22.3805	605000000	1350000	448000000	3340000	337000000	5460000					14	33	33	33	57.862	0	160.63	10	1	10	1	8	1	C4LUA2;C4LUC8	408	>tr|C4LUA2|C4LUA2_ENTHI Uncharacterized protein OS=Entamoeba histolytica OX=5759 GN=EHI_110530 PE=4 SV=1
C4M067	Thioredoxin, putative	EHI_021560	0.00673917	0.0554303	7.27434	34.3633	25.9383	33.056	26.0609	32.5956	26.1927	22100000768	64300000	8929999872	70000000	6489999872	76700000					27	64.9	64.9	64.9	42.973	0	323.31	27	5	25	4	23	7	C4M067	1031	>tr|C4M067|C4M067_ENTHI Thioredoxin, putative OS=Entamoeba histolytica OX=5759 GN=EHI_021560 PE=4 SV=1
B1N5G6;C4LV92;C4MBS2;C4M9J2	Uncharacterized protein	EHI_091350;EHI_183210	0.00411018	0.0515364	7.26898	27.0711	19	25.452	19	26.2838	19	141000000	0	45900000	0	81700000	0	+				1	10.5	10.5	10.5	18.881	1	-2	1	0	1	0	1	0	B1N5G6;C4LV92;C4MBS2;C4M9J2	170	>tr|B1N5G6|B1N5G6_ENTHI Uncharacterized protein OS=Entamoeba histolytica OX=5759 GN=EHI_091350 PE=4 SV=1;>tr|C4LV92|C4LV92_ENTHI Uncharacterized protein OS=Entamoeba histolytica OX=5759 GN=EHI_183210 PE=4 SV=1;>tr|C4MBS2|C4MBS2_ENTHI Uncharacterized protei
C4LVS3	Rab GTPase activating protein, putative	EHI_187060	0.000336218	0.0487947	7.26136	26.2225	19	26.509	19	26.0526	19	78300000	0	95500000	0	69600000	0			+	Plus DTT_Minus DTT	4	8.1	8.1	8.1	52.275	0	4.5136	1	0	3	0	4	0	C4LVS3	576	>tr|C4LVS3|C4LVS3_ENTHI Rab GTPase activating protein, putative OS=Entamoeba histolytica OX=5759 GN=EHI_187060 PE=4 SV=1
C4LXZ7	Uncharacterized protein	EHI_035670	0.0808106	0.143642	7.25581	29.3724	19	27.3828	19	22.0122	19	695000000	0	175000000	0	4230000	0					1	6.9	6.9	6.9	15.433	0.0094389	1.2998	1	0	1	0	1	0	C4LXZ7	810	>tr|C4LXZ7|C4LXZ7_ENTHI Uncharacterized protein OS=Entamoeba histolytica OX=5759 GN=EHI_035670 PE=4 SV=1
C4MAX0	Hydrolase yafV, putative	EHI_029230	0.0374074	0.0880363	7.24948	29.1164	19	27.5389	21.4375	27.189	21.6584	582000000	0	195000000	2840000	153000000	3310000					3	21.4	21.4	21.4	23.998	0	39.769	3	0	3	1	3	2	C4MAX0	1986	>tr|C4MAX0|C4MAX0_ENTHI Hydrolase yafV, putative OS=Entamoeba histolytica OX=5759 GN=EHI_029230 PE=4 SV=1
C4LTY8	CDP-alcohol phosphatidyltransferase family protein	EHI_067920	0.0153662	0.0644658	7.24796	27.9259	19	26.7129	20.9098	26.0148	19	255000000	0	110000000	1970000	67800000	0					2	5.1	5.1	5.1	42.277	0.0040392	1.9132	2	0	2	1	2	0	C4LTY8	368	>tr|C4LTY8|C4LTY8_ENTHI CDP-alcohol phosphatidyltransferase family protein OS=Entamoeba histolytica OX=5759 GN=EHI_067920 PE=3 SV=1
B1N3H3	Uncharacterized protein	EHI_079970	0.00348232	0.0492489	7.23564	26.9977	19	25.5165	19	26.1927	19	134000000	0	48000000	0	76700000	0	+		+	Plus DTT_Minus DTT	1	4	4	4	39.945	1	-2	1	0	1	0	1	0	B1N3H3	75	>tr|B1N3H3|B1N3H3_ENTHI Uncharacterized protein OS=Entamoeba histolytica OX=5759 GN=EHI_079970 PE=4 SV=1
CON__Q14525;CON__Q9UE12;CON__Q15323;CON__Q6NTB9;CON__O76009;CON__A2A5Y0;CON__Q497I4;CON__REFSEQ:XP_986630			0.00270799	0.0487947	-3.8201	19	22.5915	19	23.217	19	22.6518	0	6320000	0	9750000	0	6590000		+	+	Plus DTT_Minus DTT	2	8.4	4.5	4.5	46.213	0.0040046	1.8513	0	1	0	2	0	1	CON__Q14525;CON__Q9UE12;CON__Q15323;CON__Q6NTB9;CON__O76009;CON__A2A5Y0;CON__Q497I4;CON__REFSEQ:XP_986630;CON__O76011;CON__Q8IUT8;CON__O76014;CON__Q9D646	2102	>Q14525 SWISS-PROT:Q14525 Keratin, type I cuticular HA3-II (Hair keratin, type I HA3-II);>Q9UE12 TREMBL:Q9UE12 Type I hair keratin 1 - Homo sapiens (Human).;>Q15323 SWISS-PROT:Q15323 Keratin, type I cuticular HA1 (Hair keratin, type I HA1);>Q6NTB9 TREMBL:Q
C4LZ19	Uncharacterized protein	EHI_009410	0.0253045	0.0754062	7.22217	30.9609	21.5823	30.0217	23.0854	28.7162	23.3645	2090000000	3140000	1090000000	8900000	441000000	10800000					11	23.3	23.3	23.3	67.705	0	62.983	11	1	9	2	8	2	C4LZ19	919	>tr|C4LZ19|C4LZ19_ENTHI Uncharacterized protein OS=Entamoeba histolytica OX=5759 GN=EHI_009410 PE=3 SV=1
C4M0C7	Uncharacterized protein	EHI_064600	0.00991571	0.0585237	7.22057	27.6181	19	25.8528	19	25.1908	19	206000000	0	60600000	0	38300000	0	+				2	4.5	4.5	4.5	38.316	1	-2	1	0	1	0	2	0	C4M0C7	1047	>tr|C4M0C7|C4M0C7_ENTHI Uncharacterized protein OS=Entamoeba histolytica OX=5759 GN=EHI_064600 PE=4 SV=1
C4LYL1	Uncharacterized protein	EHI_118610	0.00736647	0.0559259	7.21454	26.965	20.9388	27.1312	19	26.4862	19	131000000	2010000	147000000	0	94000000	0	+				2	2.3	2.3	2.3	110.3	1	-2	1	1	2	0	1	0	C4LYL1	871	>tr|C4LYL1|C4LYL1_ENTHI Uncharacterized protein OS=Entamoeba histolytica OX=5759 GN=EHI_118610 PE=4 SV=1
C4M980	Protein kinase, putative	EHI_124860	0.00169409	0.0487947	7.20989	26.8019	19	25.8694	19	25.9584	19	117000000	0	61300000	0	65200000	0			+	Plus DTT_Minus DTT	5	6.1	6.1	6.1	123.31	0	15.965	5	0	1	0	2	0	C4M980	1871	>tr|C4M980|C4M980_ENTHI Protein kinase, putative OS=Entamoeba histolytica OX=5759 GN=EHI_124860 PE=4 SV=1
CON__ENSEMBL:ENSBTAP00000031900			0.0028201	0.0487947	6.57777	26.1965	19	25.5522	19	24.9847	19	76900000	0	49200000	0	33200000	0		+	+	Plus DTT_Minus DTT	3	3.6	3.6	3.6	121.45	0	11.458	3	0	2	0	2	0	CON__ENSEMBL:ENSBTAP00000031900	2053	>ENSEMBL:ENSBTAP00000031900 (Bos taurus) 121 kDa protein
C4LVM2;C4LSE7	Acid phosphatase	EHI_103800;EHI_153650	0.0230073	0.0728456	7.17653	28.3367	19	24.6703	19	25.5225	19	339000000	0	26700000	0	48200000	0					5	43.9	43.9	43.9	18.096	0	41.918	5	0	3	0	3	0	C4LVM2;C4LSE7	200	>tr|C4LVM2|C4LVM2_ENTHI Acid phosphatase OS=Entamoeba histolytica OX=5759 GN=EHI_103800 PE=3 SV=1;>tr|C4LSE7|C4LSE7_ENTHI Acid phosphatase OS=Entamoeba histolytica OX=5759 GN=EHI_153650 PE=1 SV=1
C4M018	Uncharacterized protein	EHI_134690	0.000173784	0.0487947	7.17644	26.1681	19	26.3444	19	26.0169	19	75400000	0	85200000	0	67900000	0	+		+	Plus DTT_Minus DTT	2	3.4	3.4	3.4	44.381	1	-2	2	0	2	0	2	0	C4M018	1016	>tr|C4M018|C4M018_ENTHI Uncharacterized protein OS=Entamoeba histolytica OX=5759 GN=EHI_134690 PE=4 SV=1
C4M785	Elongation factor-1alpha, putative	EHI_044230	0.00350179	0.0492489	7.17419	26.9977	19	25.9495	19	25.5754	19	134000000	0	64800000	0	50000000	0			+	Plus DTT_Minus DTT	4	7.9	7.9	7.9	60.893	0	7.4137	4	0	3	0	3	0	C4M785	1695	>tr|C4M785|C4M785_ENTHI Elongation factor-1alpha, putative OS=Entamoeba histolytica OX=5759 GN=EHI_044230 PE=4 SV=1
C4LXB6	Uncharacterized protein	EHI_098330	1.67421e-06	0.00373182	7.16097	26.143	19	26.1661	19	26.1738	19	74100000	0	75300000	0	75700000	0			+	Plus DTT_Minus DTT	1	4.2	4.2	4.2	60.422	0.0034823	1.9561	1	0	1	0	1	0	C4LXB6	739	>tr|C4LXB6|C4LXB6_ENTHI Uncharacterized protein OS=Entamoeba histolytica OX=5759 GN=EHI_098330 PE=4 SV=1
C4M242	Thioredoxin, putative	EHI_169240	0.0116878	0.0614437	7.15925	29.158	22.265	27.6251	19	27.4073	21.4476	599000000	5040000	207000000	0	178000000	2860000					5	34.4	34.4	34.4	19.585	0	15.579	5	2	3	0	4	1	C4M242	1215	>tr|C4M242|C4M242_ENTHI Thioredoxin, putative OS=Entamoeba histolytica OX=5759 GN=EHI_169240 PE=4 SV=1
C4M6K3	Lecithin:cholesterol acyltransferase, putative	EHI_065250	0.00306694	0.0488391	7.15833	26.8741	19	25.5014	19	26.0995	19	123000000	0	47500000	0	71900000	0			+	Plus DTT_Minus DTT	2	19.9	7.5	7.5	46.639	0	14.794	2	0	2	0	2	0	C4M6K3	1631	>tr|C4M6K3|C4M6K3_ENTHI Lecithin:cholesterol acyltransferase, putative OS=Entamoeba histolytica OX=5759 GN=EHI_065250 PE=4 SV=1
C4M3L7	Uncharacterized protein	EHI_109990	0.00288106	0.0487947	7.15594	30.3088	22.8461	29.6198	23.2288	29.3239	21.7098	1330000000	7540000	825000000	9830000	672000000	3430000			+	Plus DTT_Minus DTT	9	38.1	38.1	38.1	27.054	0	63.437	9	2	8	3	8	1	C4M3L7	1357	>tr|C4M3L7|C4M3L7_ENTHI Uncharacterized protein OS=Entamoeba histolytica OX=5759 GN=EHI_109990 PE=4 SV=1
C4M3R6	Glucosidase II alpha subunit, putative	EHI_052770	0.00267617	0.0487947	7.13467	26.8504	19	25.9383	19	25.6153	19	121000000	0	64300000	0	51400000	0			+	Plus DTT_Minus DTT	2	2.4	2.4	2.4	97.665	0.0012571	2.5424	2	0	2	0	2	0	C4M3R6	1375	>tr|C4M3R6|C4M3R6_ENTHI Glucosidase II alpha subunit, putative OS=Entamoeba histolytica OX=5759 GN=EHI_052770 PE=3 SV=1
Q86S07	Malate dehydrogenase	Mdh2	0.00214997	0.0487947	7.13238	25.8764	19	26.7895	19	25.7312	19	61600000	0	116000000	0	55700000	0			+	Plus DTT_Minus DTT	3	11.2	11.2	11.2	36.107	0	12.195	2	0	3	0	2	0	Q86S07	2286	>tr|Q86S07|Q86S07_ENTHI Malate dehydrogenase OS=Entamoeba histolytica OX=5759 GN=Mdh2 PE=3 SV=1
C4LWG5	Uncharacterized protein	EHI_096530	0.00707878	0.0559259	7.11949	27.2714	19	25.848	19	25.239	19	162000000	0	60400000	0	39600000	0					3	13.1	13.1	13.1	30.644	0	9.9807	3	0	2	0	2	0	C4LWG5	653	>tr|C4LWG5|C4LWG5_ENTHI Uncharacterized protein OS=Entamoeba histolytica OX=5759 GN=EHI_096530 PE=4 SV=1
C4M1B9	Uncharacterized protein	EHI_169970	0.0629399	0.121256	7.11919	29.8697	19	27.9869	22.6649	27.7958	22.6298	981000000	0	266000000	6650000	233000000	6490000					9	19	19	19	42.839	0	16.931	9	0	5	2	3	2	C4M1B9	1137	>tr|C4M1B9|C4M1B9_ENTHI Uncharacterized protein OS=Entamoeba histolytica OX=5759 GN=EHI_169970 PE=4 SV=1
C4LYH0	Dolichyl-diphosphooligosaccharide--protein glycosyltransferase subunit 1	EHI_093790	0.0127766	0.0620854	7.08551	31.2019	22.4996	30.1724	23.8576	29.9259	23.6865	2470000128	5930000	1210000000	15200000	1020000000	13500000					21	50.1	50.1	8.3	49.124	0	116.97	18	2	17	5	14	3	C4LYH0	856	>tr|C4LYH0|C4LYH0_ENTHI Dolichyl-diphosphooligosaccharide--protein glycosyltransferase subunit 1 OS=Entamoeba histolytica OX=5759 GN=EHI_093790 PE=3 SV=1
C4M7F3	Protein kinase domain containing protein	EHI_166470	0.0166076	0.065918	7.06073	27.7389	19	26.6181	21.0559	25.8811	19	224000000	0	103000000	2180000	61800000	0					5	14.9	14.9	14.9	37.53	0	32.307	4	0	3	1	3	0	C4M7F3	1712	>tr|C4M7F3|C4M7F3_ENTHI Protein kinase domain containing protein OS=Entamoeba histolytica OX=5759 GN=EHI_166470 PE=2 SV=1
B1N4L9	Uncharacterized protein	EHI_125010	0.00208669	0.0487947	7.05575	26.6865	19	25.6209	19	25.8599	19	108000000	0	51600000	0	60900000	0	+		+	Plus DTT_Minus DTT	1	3.8	3.8	3.8	53.735	1	-2	1	0	1	0	1	0	B1N4L9	137	>tr|B1N4L9|B1N4L9_ENTHI Uncharacterized protein OS=Entamoeba histolytica OX=5759 GN=EHI_125010 PE=4 SV=1
C4M9B1	Uncharacterized protein	EHI_193090	0.0218841	0.0718405	7.05252	27.9259	19	25.9781	19	24.2535	19	255000000	0	66100000	0	20000000	0					5	11.2	11.2	11.2	64.807	0	15.657	4	0	2	0	2	0	C4M9B1	1880	>tr|C4M9B1|C4M9B1_ENTHI Uncharacterized protein OS=Entamoeba histolytica OX=5759 GN=EHI_193090 PE=4 SV=1
C4LX44	Iron hydrogenase, putative	EHI_159640	0.0295299	0.0800732	7.04996	27.2714	19	27.3066	19	26.9203	22.3484	162000000	0	166000000	0	127000000	5340000					3	10.6	10.6	10.6	45.039	0	16.183	2	0	3	0	3	1	C4LX44	724	>tr|C4LX44|C4LX44_ENTHI Iron hydrogenase, putative OS=Entamoeba histolytica OX=5759 GN=EHI_159640 PE=3 SV=1
C4LV58	Uncharacterized protein	EHI_182770	0.0105899	0.0591343	7.04369	30.9188	23.6649	30.6881	22.4972	30.1724	24.4862	2030000000	13300000	1730000000	5920000	1210000000	23500000					22	39.4	39.4	39.4	71.881	0	119.04	19	3	21	1	18	4	C4LV58	500	>tr|C4LV58|C4LV58_ENTHI Uncharacterized protein OS=Entamoeba histolytica OX=5759 GN=EHI_182770 PE=4 SV=1
C4LW15	Rho family GTPase	EHI_126310	0.0126233	0.0620854	7.038	30.5481	21.9388	29.94	23.4425	29.0296	23.0224	1570000000	4020000	1030000000	11400000	548000000	8520000					10	53.8	53.8	53.8	24.437	0	89.863	9	1	10	2	10	1	C4LW15	609	>tr|C4LW15|C4LW15_ENTHI Rho family GTPase OS=Entamoeba histolytica OX=5759 GN=EHI_126310 PE=3 SV=1
C4LUB2;C4LTV2	Tyrosine kinase, putative	EHI_110650;EHI_050820	0.00208987	0.0487947	7.02382	26.518	19	26.1332	19	25.4202	19	96100000	0	73600000	0	44900000	0	+		+	Plus DTT_Minus DTT	2	1.1	1.1	1.1	196.17	1	-2	2	0	2	0	1	0	C4LUB2;C4LTV2	356	>tr|C4LUB2|C4LUB2_ENTHI Tyrosine kinase, putative OS=Entamoeba histolytica OX=5759 GN=EHI_110650 PE=4 SV=1;>tr|C4LTV2|C4LTV2_ENTHI Tyrosine kinase, putative OS=Entamoeba histolytica OX=5759 GN=EHI_050820 PE=4 SV=1
C4LTY4	Uncharacterized protein	EHI_067880	0.013559	0.0621874	7.00029	27.4785	19	25.8904	19	24.632	19	187000000	0	62200000	0	26000000	0	+				1	7.3	7.3	7.3	25.88	1	-2	1	0	1	0	1	0	C4LTY4	366	>tr|C4LTY4|C4LTY4_ENTHI Uncharacterized protein OS=Entamoeba histolytica OX=5759 GN=EHI_067880 PE=4 SV=1
C4M6I1	Uncharacterized protein	EHI_173440	0.0115165	0.0609744	6.99911	27.4938	19	25.4676	19	25.0359	19	189000000	0	46400000	0	34400000	0					6	6.3	6.3	6.3	113.81	0	12.164	6	0	2	0	2	0	C4M6I1	1626	>tr|C4M6I1|C4M6I1_ENTHI Uncharacterized protein OS=Entamoeba histolytica OX=5759 GN=EHI_173440 PE=4 SV=1
C4LVH0	Protein kinase, putative	EHI_197540	0.00148448	0.0487947	6.99086	25.654	19	26.524	19	25.7945	19	52800000	0	96500000	0	58200000	0	+		+	Plus DTT_Minus DTT	2	4.2	4.2	4.2	46.106	1	-2	1	1	1	0	1	0	C4LVH0	533	>tr|C4LVH0|C4LVH0_ENTHI Protein kinase, putative OS=Entamoeba histolytica OX=5759 GN=EHI_197540 PE=3 SV=1
C4LZW1	Uncharacterized protein	EHI_194490	0.00162647	0.0487947	6.98984	26.0422	19	26.4504	19	25.4769	19	69100000	0	91700000	0	46700000	0			+	Plus DTT_Minus DTT	3	7.6	7.6	7.6	43.428	0	4.2909	2	0	3	0	3	0	C4LZW1	995	>tr|C4LZW1|C4LZW1_ENTHI Uncharacterized protein OS=Entamoeba histolytica OX=5759 GN=EHI_194490 PE=4 SV=1
CON__Q3MHN5;CON__ENSEMBL:ENSBTAP00000018229			0.00337617	0.0492489	7.1625	26.4138	19	26.726	19	25.3477	19	89400000	0	111000000	0	42700000	0		+	+	Plus DTT_Minus DTT	4	10.3	10.3	10.3	53.341	0	9.6543	2	0	3	0	1	0	CON__Q3MHN5;CON__ENSEMBL:ENSBTAP00000018229	2048	>Q3MHN5 SWISS-PROT:Q3MHN5 (Bos taurus) Vitamin D-binding protein precursor;>ENSEMBL:ENSBTAP00000018229 (Bos taurus) 54 kDa protein
C4LYM9	Protein kinase domain containing protein	EHI_118810	0.013964	0.062705	6.97311	29.995	21.4825	28.8534	23.2006	28.019	21.265	1070000000	2930000	485000000	9640000	272000000	2520000					16	14.9	14.9	12.3	122.21	0	108	16	2	10	2	10	1	C4LYM9;C4LVK8	879	>tr|C4LYM9|C4LYM9_ENTHI Protein kinase domain containing protein OS=Entamoeba histolytica OX=5759 GN=EHI_118810 PE=4 SV=1
C4M0I9	Proteasome endopeptidase complex	EHI_024470	0.0205507	0.0702568	6.96549	27.3578	20.8802	27.9146	19	27.4785	21.9742	172000000	1930000	253000000	0	187000000	4120000					3	17.8	17.8	17.8	22.624	0	36.47	3	1	3	0	3	2	C4M0I9	1068	>tr|C4M0I9|C4M0I9_ENTHI Proteasome endopeptidase complex OS=Entamoeba histolytica OX=5759 GN=EHI_024470 PE=4 SV=1
C4M542	Uncharacterized protein	EHI_078270	0.00774383	0.0559259	6.95873	27.1507	19	25.632	19	25.0935	19	149000000	0	52000000	0	35800000	0					3	3.8	3.8	3.8	86.365	0	7.6086	3	0	2	0	2	0	C4M542	1507	>tr|C4M542|C4M542_ENTHI Uncharacterized protein OS=Entamoeba histolytica OX=5759 GN=EHI_078270 PE=4 SV=1
C4MAP2	Uncharacterized protein	EHI_162560	0.00586598	0.05403	6.93595	29.3766	21.6364	28.604	21.4626	28.5315	22.6051	697000000	3260000	408000000	2890000	388000000	6380000					12	22.4	22.4	22.4	62.485	0	29.942	10	2	9	1	8	2	C4MAP2	1971	>tr|C4MAP2|C4MAP2_ENTHI Uncharacterized protein OS=Entamoeba histolytica OX=5759 GN=EHI_162560 PE=4 SV=1
C4MAH1	Importin N-terminal domain-containing protein	EHI_171760	0.0213089	0.0706041	6.9358	31.325	22.7955	30.6964	23.4298	30.7373	25.726	2689999872	7280000	1740000000	11300000	1790000000	55500000					25	39.1	39.1	39.1	92.9	0	235.84	22	3	22	3	21	8	C4MAH1;C4M2R0;C4M0H8	1959	>tr|C4MAH1|C4MAH1_ENTHI Importin N-terminal domain-containing protein OS=Entamoeba histolytica OX=5759 GN=EHI_171760 PE=4 SV=1
C4M840	Cytoplasmic tRNA 2-thiolation protein 1	EHI_108760	0.0263559	0.0766382	6.93419	27.8504	19	26.0732	19	25.6096	20.7307	242000000	0	70600000	0	51200000	1740000					5	23	23	23	35.325	0	48.675	4	0	3	0	3	1	C4M840	1766	>tr|C4M840|C4M840_ENTHI Cytoplasmic tRNA 2-thiolation protein 1 OS=Entamoeba histolytica OX=5759 GN=EHI_108760 PE=2 SV=1
B1N302;C4LUU9	Peptidylprolyl isomerase	EHI_051870;EHI_178850	0.00606362	0.0540667	6.91796	32.0737	24.2607	30.8974	24.9539	30.5844	23.5869	4520000000	20100000	2000000000	32500000	1610000000	12600000					19	40.1	40.1	40.1	39.405	0	75.906	18	3	15	2	13	2	B1N302;C4LUU9	43	>tr|B1N302|B1N302_ENTHI Peptidylprolyl isomerase OS=Entamoeba histolytica OX=5759 GN=EHI_051870 PE=4 SV=1;>tr|C4LUU9|C4LUU9_ENTHI Peptidylprolyl isomerase OS=Entamoeba histolytica OX=5759 GN=EHI_178850 PE=4 SV=1
B1N403	Uncharacterized protein	EHI_161980	0.0359261	0.0873244	6.9151	28.7864	22.8307	28.5754	19	28.3536	23.1395	463000000	7460000	400000000	0	343000000	9240000					4	22.5	22.5	22.5	23.689	0	49.923	3	1	4	0	4	1	B1N403	104	>tr|B1N403|B1N403_ENTHI Uncharacterized protein OS=Entamoeba histolytica OX=5759 GN=EHI_161980 PE=4 SV=1
CON__ENSEMBL:ENSBTAP00000007350			0.0035379	0.0492873	5.93608	31.1842	25.3778	31.5709	24.9672	30.3828	24.9847	2440000000	43600000	3190000128	32800000	1400000000	33200000		+	+	Plus DTT_Minus DTT	32	20.2	20.2	3.5	192.99	0	120.68	25	12	30	8	23	9	CON__ENSEMBL:ENSBTAP00000007350	2046	>ENSEMBL:ENSBTAP00000007350 (Bos taurus) similar to Complement C4-A precursor
C4LYI4	Guanylate-binding protein, putative	EHI_093930	0.0276398	0.078885	6.90343	27.019	19	27.1312	19	26.8019	22.2419	136000000	0	147000000	0	117000000	4960000					5	6.6	6.6	6.6	87.961	0	12.82	3	0	4	0	3	1	C4LYI4	865	>tr|C4LYI4|C4LYI4_ENTHI Guanylate-binding protein, putative OS=Entamoeba histolytica OX=5759 GN=EHI_093930 PE=4 SV=1
C4M9L5	Uncharacterized protein	EHI_022260	0.0015459	0.0487947	6.90336	25.7745	19	26.425	19	25.5105	19	57400000	0	90100000	0	47800000	0			+	Plus DTT_Minus DTT	4	4.1	4.1	4.1	105.49	0	5.2522	2	0	3	0	3	0	C4M9L5	1900	>tr|C4M9L5|C4M9L5_ENTHI Uncharacterized protein OS=Entamoeba histolytica OX=5759 GN=EHI_022260 PE=4 SV=1
C4M3I8	Papain family cysteine protease domain containing protein	EHI_138460	0.00906745	0.0559259	6.8801	30.7771	22.8423	30.1724	23.1332	29.7517	24.0854	1840000000	7520000	1210000000	9200000	904000000	17800000					13	26.2	26.2	26.2	65.517	0	51.232	11	3	12	2	11	4	C4M3I8	1349	>tr|C4M3I8|C4M3I8_ENTHI Papain family cysteine protease domain containing protein OS=Entamoeba histolytica OX=5759 GN=EHI_138460 PE=3 SV=1
C4M683	Tyrosine kinase, putative	EHI_117680	0.0280228	0.0789038	6.87589	27.4154	19	26.6458	19	26.346	21.7796	179000000	0	105000000	0	85300000	3600000	+				1	1.2	1.2	1.2	203.03	1	-2	1	0	1	0	1	1	C4M683	1608	>tr|C4M683|C4M683_ENTHI Tyrosine kinase, putative OS=Entamoeba histolytica OX=5759 GN=EHI_117680 PE=4 SV=1
C4LTL9	Uncharacterized protein	EHI_012260	0.000406418	0.0487947	6.86528	26.1273	19	25.8118	19	25.6568	19	73300000	0	58900000	0	52900000	0	+		+	Plus DTT_Minus DTT	2	15.7	15.7	15.7	16.234	1	-2	1	0	2	0	2	0	C4LTL9	327	>tr|C4LTL9|C4LTL9_ENTHI Uncharacterized protein OS=Entamoeba histolytica OX=5759 GN=EHI_012260 PE=4 SV=1
B1N4E9	Protein phosphatase domain-containing protein	EHI_075640	0.00874063	0.0559259	6.83538	27.1214	19	25.2243	19	25.1604	19	146000000	0	39200000	0	37500000	0					4	5.5	5.5	5.5	79.743	0	4.7205	4	0	2	0	1	0	B1N4E9	125	>tr|B1N4E9|B1N4E9_ENTHI Protein phosphatase domain-containing protein OS=Entamoeba histolytica OX=5759 GN=EHI_075640 PE=4 SV=1
C4LVL4	Uncharacterized protein	EHI_103720	0.000445132	0.0487947	6.82507	26.0567	19	25.8576	19	25.5609	19	69800000	0	60800000	0	49500000	0			+	Plus DTT_Minus DTT	2	5.3	5.3	5.3	53.78	0	2.9462	2	0	2	0	2	0	C4LVL4	549	>tr|C4LVL4|C4LVL4_ENTHI Uncharacterized protein OS=Entamoeba histolytica OX=5759 GN=EHI_103720 PE=4 SV=1
C4LXJ6	Uncharacterized protein	EHI_073310	0.00058452	0.0487947	6.82476	25.8764	19	26.0813	19	25.5165	19	61600000	0	71000000	0	48000000	0			+	Plus DTT_Minus DTT	4	9.4	9.4	9.4	71.222	0	4.4315	2	0	3	0	2	0	C4LXJ6	775	>tr|C4LXJ6|C4LXJ6_ENTHI Uncharacterized protein OS=Entamoeba histolytica OX=5759 GN=EHI_073310 PE=4 SV=1
C4MA28	Lysozyme, putative	EHI_089990	0.00170763	0.0487947	6.82045	26.341	19	25.7492	19	25.3712	19	85000000	0	56400000	0	43400000	0			+	Plus DTT_Minus DTT	2	14.9	14.9	14.9	23.327	0	5.0569	2	0	2	0	2	0	C4MA28	1941	>tr|C4MA28|C4MA28_ENTHI Lysozyme, putative OS=Entamoeba histolytica OX=5759 GN=EHI_089990 PE=3 SV=1
C4M1H6	Beta-amylase	EHI_192590	0.00585974	0.05403	6.81994	31.1115	23.2821	30.9259	24.3645	30.4134	24.3444	2320000000	10200000	2040000000	21600000	1430000000	21300000					13	43.6	43.6	43.6	47.308	0	68.847	12	1	12	2	9	2	C4M1H6;C4LYK5;B1N3U6;B1N2L4	1154	>tr|C4M1H6|C4M1H6_ENTHI Beta-amylase OS=Entamoeba histolytica OX=5759 GN=EHI_192590 PE=2 SV=1
C4M3H0	RhoGAP domain containing protein	EHI_017650	0.0038036	0.0496409	6.80551	26.976	20.9951	26.3645	19	26.0711	19	132000000	2090000	86400000	0	70500000	0			+	Plus DTT_Minus DTT	2	5.1	5.1	5.1	48.121	0	4.7925	2	1	2	0	2	0	C4M3H0	1346	>tr|C4M3H0|C4M3H0_ENTHI RhoGAP domain containing protein OS=Entamoeba histolytica OX=5759 GN=EHI_017650 PE=4 SV=1
C4LWC1	Uncharacterized protein	EHI_155720	0.000614101	0.0487947	6.79853	26.0995	19	25.7796	19	25.5165	19	71900000	0	57600000	0	48000000	0			+	Plus DTT_Minus DTT	2	4.1	4.1	4.1	40.561	0	16.605	2	0	2	0	2	0	C4LWC1	639	>tr|C4LWC1|C4LWC1_ENTHI Uncharacterized protein OS=Entamoeba histolytica OX=5759 GN=EHI_155720 PE=4 SV=1
C4LVN5	Glucosamine 6-phosphate N-acetyltransferase	EHI_186340	0.0294078	0.0798418	6.78908	29.9814	20.8727	29.249	23.1534	28.7613	23.5983	1060000000	1920000	638000000	9330000	455000000	12700000					7	44.7	44.7	44.7	18.043	0	21.23	7	1	7	2	7	4	C4LVN5	559	>tr|C4LVN5|C4LVN5_ENTHI Glucosamine 6-phosphate N-acetyltransferase OS=Entamoeba histolytica OX=5759 GN=EHI_186340 PE=3 SV=1
C4M023	Iron-sulfur flavoprotein, putative	EHI_134740	0.0231609	0.0729773	6.78363	32.611	23.7995	31.6798	25.433	30.995	25.7024	6560000000	14600000	3440000000	45300000	2140000000	54600000					16	65.5	65.5	65.5	21.746	0	72.031	16	4	16	7	15	7	C4M023	1018	>tr|C4M023|C4M023_ENTHI Iron-sulfur flavoprotein, putative OS=Entamoeba histolytica OX=5759 GN=EHI_134740 PE=4 SV=1
C4M817	Uncharacterized protein	EHI_002140	0.0394818	0.0910082	6.78301	27.6389	19	26.6458	19	25.6784	21.6141	209000000	0	105000000	0	53700000	3210000					1	6.2	6.2	6.2	24.184	0	3.4724	1	0	1	0	1	1	C4M817	1760	>tr|C4M817|C4M817_ENTHI Uncharacterized protein OS=Entamoeba histolytica OX=5759 GN=EHI_002140 PE=4 SV=1
C4LS82;C4M5P8	Alpha-amylase	EHI_152880;EHI_129810	0.0133282	0.0621874	6.78148	27.3578	19	24.8811	19	25.1055	19	172000000	0	30900000	0	36100000	0					3	6.5	6.5	6.5	69.485	0	5.9301	3	0	1	0	2	0	C4LS82;C4M5P8	179	>tr|C4LS82|C4LS82_ENTHI Alpha-amylase OS=Entamoeba histolytica OX=5759 GN=EHI_152880 PE=3 SV=1;>tr|C4M5P8|C4M5P8_ENTHI Alpha-amylase OS=Entamoeba histolytica OX=5759 GN=EHI_129810 PE=3 SV=1
C4LWZ1	Vacuolar sorting protein 26, putative	EHI_127180	0.015431	0.0644658	6.77562	27.7708	20.1206	27.0609	21.9882	26.604	19	229000000	1140000	140000000	4160000	102000000	0					5	18.1	18.1	18.1	35.56	0	16.452	5	1	5	2	5	0	C4LWZ1	709	>tr|C4LWZ1|C4LWZ1_ENTHI Vacuolar sorting protein 26, putative OS=Entamoeba histolytica OX=5759 GN=EHI_127180 PE=3 SV=1
C4LXJ0	Palmitoyltransferase	EHI_131240	0.000941274	0.0487947	6.76643	26.1604	19	25.6838	19	25.4551	19	75000000	0	53900000	0	46000000	0	+		+	Plus DTT_Minus DTT	1	3	3	3	38.637	1	-2	1	0	1	0	1	0	C4LXJ0	773	>tr|C4LXJ0|C4LXJ0_ENTHI Palmitoyltransferase OS=Entamoeba histolytica OX=5759 GN=EHI_131240 PE=3 SV=1
C4LTS7	E3 ubiquitin-protein ligase	EHI_050540	0.0402431	0.0919261	6.76631	28.2759	19	26.9977	22.5615	25.5869	19	325000000	0	134000000	6190000	50400000	0					5	7.5	7.5	7.5	87.98	0	9.7282	5	0	4	1	2	0	C4LTS7	347	>tr|C4LTS7|C4LTS7_ENTHI E3 ubiquitin-protein ligase OS=Entamoeba histolytica OX=5759 GN=EHI_050540 PE=3 SV=1
C4LWX3	Uncharacterized protein	EHI_126970	0.0592643	0.116613	6.75924	28.17	19	25.945	22.5237	26.6865	19	302000000	0	64600000	6030000	108000000	0					10	12.3	12.3	12.3	106.26	0	46.004	9	0	5	2	6	0	C4LWX3	703	>tr|C4LWX3|C4LWX3_ENTHI Uncharacterized protein OS=Entamoeba histolytica OX=5759 GN=EHI_126970 PE=4 SV=1
C4LTT9	Uncharacterized protein	EHI_050690	0.0153426	0.0644658	6.7403	28.9372	20.7796	28.1214	22.8858	27.6389	20.8113	514000000	1800000	292000000	7750000	209000000	1840000					7	19.9	19.9	19.9	36.382	0	15.622	5	1	6	2	4	1	C4LTT9	352	>tr|C4LTT9|C4LTT9_ENTHI Uncharacterized protein OS=Entamoeba histolytica OX=5759 GN=EHI_050690 PE=4 SV=1
C4M8V3	Scavenger mRNA decapping enzyme, putative	EHI_169590	0.00320273	0.0488391	6.73411	26.3578	19	25.8044	19	25.0401	19	86000000	0	58600000	0	34500000	0			+	Plus DTT_Minus DTT	2	9.1	9.1	9.1	33.619	0	15.674	2	0	2	0	2	1	C4M8V3	1833	>tr|C4M8V3|C4M8V3_ENTHI Scavenger mRNA decapping enzyme, putative OS=Entamoeba histolytica OX=5759 GN=EHI_169590 PE=3 SV=1
C4M7A1	Gal/GalNAc lectin heavy subunit, putative	EHI_046650	0.0223408	0.0720329	6.73257	31.3724	22.6276	29.3683	23.9672	29.3196	23.2679	2780000000	6480000	693000000	16400000	670000000	10100000					30	27.9	27.9	27.9	134.78	0	181.97	29	2	19	5	22	3	C4M7A1	1700	>tr|C4M7A1|C4M7A1_ENTHI Gal/GalNAc lectin heavy subunit, putative OS=Entamoeba histolytica OX=5759 GN=EHI_046650 PE=4 SV=1
C4LU13	60S ribosomal protein L31, putative	EHI_068200	0.0516885	0.106778	6.73077	27.3662	19	27.2803	19	27.2535	23.7077	173000000	0	163000000	0	160000000	13700000					2	20	20	15.3	17.243	0	16.86	1	0	1	0	2	1	C4LU13	377	>tr|C4LU13|C4LU13_ENTHI 60S ribosomal protein L31, putative OS=Entamoeba histolytica OX=5759 GN=EHI_068200 PE=2 SV=1
C4MAY5	Serine/threonine-protein phosphatase	EHI_167510	0.0246919	0.0750863	6.72955	27.2714	19	26.2625	19	25.4738	20.8191	162000000	0	80500000	0	46600000	1850000					4	8.9	8.9	8.9	61.095	0	13.772	4	0	3	0	2	1	C4MAY5	1991	>tr|C4MAY5|C4MAY5_ENTHI Serine/threonine-protein phosphatase OS=Entamoeba histolytica OX=5759 GN=EHI_167510 PE=3 SV=1
B1N570	Nicotinamide-nucleotide adenylyltransferase	EHI_010950	0.00498106	0.0515942	6.72281	26.5448	19	25.7286	19	24.895	19	97900000	0	55600000	0	31200000	0					2	9.4	9.4	9.4	25.208	0.0012353	2.4105	2	0	2	0	2	0	B1N570	158	>tr|B1N570|B1N570_ENTHI Nicotinamide-nucleotide adenylyltransferase OS=Entamoeba histolytica OX=5759 GN=EHI_010950 PE=3 SV=1
C4LYD0	Uncharacterized protein	EHI_007930	0.00315442	0.0488391	6.72229	30.1724	23.0002	30.1483	23.1238	28.9841	23.0139	1210000000	8390000	1190000000	9140000	531000000	8470000			+	Plus DTT_Minus DTT	10	34.1	34.1	34.1	44.602	0	77.817	8	1	10	1	7	1	C4LYD0	845	>tr|C4LYD0|C4LYD0_ENTHI Uncharacterized protein OS=Entamoeba histolytica OX=5759 GN=EHI_007930 PE=4 SV=1
C4LV67	TFIIH basal transcription factor complex subunit, putative	EHI_182880	0.00316226	0.0488391	6.71433	25.228	19	26.4598	19	25.4551	19	39300000	0	92300000	0	46000000	0	+		+	Plus DTT_Minus DTT	1	3	3	3	42.538	1	-2	1	0	1	0	1	0	C4LV67	503	>tr|C4LV67|C4LV67_ENTHI TFIIH basal transcription factor complex subunit, putative OS=Entamoeba histolytica OX=5759 GN=EHI_182880 PE=3 SV=1
C4LSN4	Non-specific serine/threonine protein kinase	EHI_151950	0.00720846	0.0559259	6.70225	28.5278	21.9243	26.965	21.2006	26.7389	19	387000000	3980000	131000000	2410000	112000000	0					4	11	11	11	38.739	0	5.5025	4	1	3	1	3	0	C4LSN4	230	>tr|C4LSN4|C4LSN4_ENTHI Non-specific serine/threonine protein kinase OS=Entamoeba histolytica OX=5759 GN=EHI_151950 PE=3 SV=1
C4M307	Cysteine proteinase 1, putative	EHI_074180	0.00811237	0.0559259	6.70105	34.5584	26.6458	33.715	27.5463	33.715	27.6931	25300000768	105000000	14099999744	196000000	14099999744	217000000					19	73.7	65.1	65.1	35.083	0	323.31	19	7	19	6	19	5	C4M307	1306	>tr|C4M307|C4M307_ENTHI Cysteine proteinase 1, putative OS=Entamoeba histolytica OX=5759 GN=EHI_074180 PE=3 SV=1
C4M4V4;C4M5S7;C4LUD0;C4LT63	Regulator of nonsense transcripts, putative	EHI_193520;EHI_070810	0.0180433	0.0666974	6.68317	27.4234	19	25.275	19	24.3511	19	180000000	0	40600000	0	21400000	0					7	8.9	8.9	8.9	107.87	0	18.019	7	0	3	0	3	0	C4M4V4;C4M5S7;C4LUD0;C4LT63;C4LUR8	1486	>tr|C4M4V4|C4M4V4_ENTHI Regulator of nonsense transcripts, putative OS=Entamoeba histolytica OX=5759 GN=EHI_193520 PE=4 SV=1;>tr|C4M5S7|C4M5S7_ENTHI Regulator of nonsense transcripts, putative OS=Entamoeba histolytica OX=5759 GN=EHI_070810 PE=4 SV=1;>tr|C4
B1N3H9	Uncharacterized protein	EHI_076780	0.0575101	0.114455	6.67603	26.8264	23.4923	27.524	19	27.17	19	119000000	11800000	193000000	0	151000000	0	+				1	1.2	1.2	1.2	103.44	1	-2	1	1	1	0	1	0	B1N3H9	77	>tr|B1N3H9|B1N3H9_ENTHI Uncharacterized protein OS=Entamoeba histolytica OX=5759 GN=EHI_076780 PE=4 SV=1
C4M3Y0	Uncharacterized protein	EHI_200750	0.000227539	0.0487947	6.66884	25.7234	19	25.8093	19	25.4738	19	55400000	0	58800000	0	46600000	0	+		+	Plus DTT_Minus DTT	1	2.8	2.8	2.8	37.024	1	-2	1	0	1	0	1	0	C4M3Y0	1397	>tr|C4M3Y0|C4M3Y0_ENTHI Uncharacterized protein OS=Entamoeba histolytica OX=5759 GN=EHI_200750 PE=3 SV=1
C4MA39	Protein kinase domain containing protein	EHI_180660	0.000153426	0.0487947	6.66828	25.8191	19	25.6513	19	25.5345	19	59200000	0	52700000	0	48600000	0			+	Plus DTT_Minus DTT	3	5.9	5.9	5.9	67.073	0	5.6451	2	0	1	0	2	0	C4MA39	1942	>tr|C4MA39|C4MA39_ENTHI Protein kinase domain containing protein OS=Entamoeba histolytica OX=5759 GN=EHI_180660 PE=4 SV=1
C4M695	Protein kinase domain containing protein	EHI_081790	0.0432124	0.0961282	6.65165	28.4512	19	27.0914	21.3376	26.5374	21.7876	367000000	0	143000000	2650000	97400000	3620000					8	11.5	10.2	10.2	132.79	0	37.72	8	0	5	1	4	1	C4M695;B1N4M7	1610	>tr|C4M695|C4M695_ENTHI Protein kinase domain containing protein OS=Entamoeba histolytica OX=5759 GN=EHI_081790 PE=4 SV=1
C4M534	Activating signal cointegrator 1 complex subunit 1, putative	EHI_128160	0.0169896	0.0659748	6.64774	29.4214	21.0821	27.6663	22.2707	27.6458	21.4375	719000000	2220000	213000000	5060000	210000000	2840000					9	22.1	22.1	22.1	39.705	0	18.352	9	1	7	2	7	1	C4M534	1504	>tr|C4M534|C4M534_ENTHI Activating signal cointegrator 1 complex subunit 1, putative OS=Entamoeba histolytica OX=5759 GN=EHI_128160 PE=4 SV=1
C4M1F5	G2/mitotic-specific cyclin-B3	EHI_030880	0.00112811	0.0487947	6.64163	27.0084	20.654	26.0813	19	25.4892	19	135000000	1650000	71000000	0	47100000	0			+	Plus DTT_Minus DTT	1	4.2	4.2	4.2	35.362	0	3.044	1	1	1	0	1	0	C4M1F5	1148	>tr|C4M1F5|C4M1F5_ENTHI G2/mitotic-specific cyclin-B3 OS=Entamoeba histolytica OX=5759 GN=EHI_030880 PE=3 SV=1
C4M9R9	Proliferating cell nuclear antigen	EHI_128450	0.0317926	0.0825297	6.63344	26.2463	19	27.3578	19	27.4073	23.1111	79600000	0	172000000	0	178000000	9060000					4	15.3	15.3	15.3	28.502	0	23.178	1	0	3	0	4	1	C4M9R9	1910	>tr|C4M9R9|C4M9R9_ENTHI Proliferating cell nuclear antigen OS=Entamoeba histolytica OX=5759 GN=EHI_128450 PE=1 SV=1
C4MAZ0;B1N3C3	Plasma membrane calcium ion-transporting ATPase, putative;Plasma membrane calcium-transporting ATPase, putative	EHI_136610;EHI	0.0645592	0.123628	6.63335	28.8916	19	27.8142	21.6006	27.2625	23.4676	498000000	0	236000000	3180000	161000000	11600000					10	19	17.7	14.4	69.255	0	41.871	10	0	9	1	7	3	C4MAZ0;B1N3C3	1992	>tr|C4MAZ0|C4MAZ0_ENTHI Plasma membrane calcium ion-transporting ATPase, putative OS=Entamoeba histolytica OX=5759 GN=EHI_136610 PE=4 SV=1;>tr|B1N3C3|B1N3C3_ENTHI Plasma membrane calcium-transporting ATPase, putative OS=Entamoeba histolytica OX=5759 GN=EHI
Q8MU40	Nitrogen fixation protein NifU	EHI_049620	0.00741918	0.0559259	6.6234	34.8516	27.0813	34.043	28.0243	33.5978	27.5165	31000000512	142000000	17699999744	273000000	12999999488	192000000					40	86.2	86.2	86.2	38.92	0	323.31	36	10	38	14	36	12	Q8MU40	2291	>tr|Q8MU40|Q8MU40_ENTHI Nitrogen fixation protein NifU OS=Entamoeba histolytica OX=5759 GN=EHI_049620 PE=3 SV=1
C4LYT4	Ran binding protein, putative	EHI_010370	0.000963053	0.0487947	6.61608	25.9562	19	25.6458	19	25.2463	19	65100000	0	52500000	0	39800000	0			+	Plus DTT_Minus DTT	1	1	1	1	120.45	0	3.9183	1	0	1	0	1	0	C4LYT4	897	>tr|C4LYT4|C4LYT4_ENTHI Ran binding protein, putative OS=Entamoeba histolytica OX=5759 GN=EHI_010370 PE=4 SV=1
C4MBL4	Phosphatidylinositol-3,5-bisphosphate 3-phosphatase	EHI_161190	0.00664032	0.0550234	6.61303	26.6865	19	28.0965	22.1457	27.6595	21.4576	108000000	0	287000000	4640000	212000000	2880000	+				1	1.8	1.8	1.8	77.123	1	-2	1	0	1	1	1	1	C4MBL4	2034	>tr|C4MBL4|C4MBL4_ENTHI Phosphatidylinositol-3,5-bisphosphate 3-phosphatase OS=Entamoeba histolytica OX=5759 GN=EHI_161190 PE=3 SV=1
C4LT44	tRNA (guanine(26)-N(2))-dimethyltransferase	EHI_148760	0.00740406	0.0559259	6.61188	26.3762	19	24.4923	19	25.9672	19	87100000	0	23600000	0	65600000	0					4	10.2	10.2	10.2	55.17	0	4.0991	2	0	1	1	3	0	C4LT44	282	>tr|C4LT44|C4LT44_ENTHI tRNA (guanine(26)-N(2))-dimethyltransferase OS=Entamoeba histolytica OX=5759 GN=EHI_148760 PE=3 SV=1
C4M6T0	Protein kinase, putative	EHI_184540	0.0592673	0.116613	6.6031	28.7162	19	28.1652	22.0088	26.976	23.0393	441000000	0	301000000	4220000	132000000	8620000					9	9.4	9.4	9.4	120.75	0	25.619	8	0	8	2	6	2	C4M6T0	1652	>tr|C4M6T0|C4M6T0_ENTHI Protein kinase, putative OS=Entamoeba histolytica OX=5759 GN=EHI_184540 PE=4 SV=1
C4M2F1	Peptidase T, putative	EHI_158320	0.0115157	0.0609744	6.60011	27.0084	19	24.6865	19	25.1055	19	135000000	0	27000000	0	36100000	0					3	8.2	8.2	8.2	44.947	0	4.2703	3	0	1	0	2	0	C4M2F1	1242	>tr|C4M2F1|C4M2F1_ENTHI Peptidase T, putative OS=Entamoeba histolytica OX=5759 GN=EHI_158320 PE=3 SV=1
B1N2L3	Galactose-specific adhesin light subunit, putative	EHI_049690	0.00807003	0.0559259	6.56164	31.3568	24.2243	30.2193	23.0426	30.1604	24.7846	2750000128	19600000	1250000000	8640000	1200000000	28900000					10	54.2	36.5	31.9	33.91	0	52.725	10	3	9	2	9	3	B1N2L3	20	>tr|B1N2L3|B1N2L3_ENTHI Galactose-specific adhesin light subunit, putative OS=Entamoeba histolytica OX=5759 GN=EHI_049690 PE=2 SV=1
C4M407	Uncharacterized protein	EHI_195020	0.00883358	0.0559259	6.55615	27.4154	22.0918	26.2944	19	26.0505	19	179000000	4470000	82300000	0	69500000	0	+				1	3.7	3.7	3.7	31.583	1	-2	1	1	1	0	1	0	C4M407	1410	>tr|C4M407|C4M407_ENTHI Uncharacterized protein OS=Entamoeba histolytica OX=5759 GN=EHI_195020 PE=4 SV=1
C4M3T3	Uncharacterized protein	EHI_163520	0.0292805	0.0796902	6.55233	26.7645	19	26.632	19	25.8881	21.6276	114000000	0	104000000	0	62100000	3240000					3	9.5	9.5	9.5	34.041	0	4.2573	2	0	3	0	3	1	C4M3T3	1383	>tr|C4M3T3|C4M3T3_ENTHI Uncharacterized protein OS=Entamoeba histolytica OX=5759 GN=EHI_163520 PE=4 SV=1
C4MB22	Ribose 5-phosphate isomerase, putative	EHI_176150	0.0290017	0.0796902	6.55066	31.1664	22.343	30.2647	25.019	29.6355	24.0526	2409999872	5320000	1290000000	34000000	834000000	17400000					9	69.9	69.9	69.9	16.075	0	87.183	9	2	9	4	9	4	C4MB22	1997	>tr|C4MB22|C4MB22_ENTHI Ribose 5-phosphate isomerase, putative OS=Entamoeba histolytica OX=5759 GN=EHI_176150 PE=4 SV=1
B1N5A7;C4M2T8	Uncharacterized protein	EHI_018390;EHI_077290	0.00139527	0.0487947	6.54307	25.9912	19	25.4892	19	25.1488	19	66700000	0	47100000	0	37200000	0	+		+	Plus DTT_Minus DTT	1	2	2	2	105.95	1	-2	1	0	1	0	1	0	B1N5A7;C4M2T8	165	>tr|B1N5A7|B1N5A7_ENTHI Uncharacterized protein OS=Entamoeba histolytica OX=5759 GN=EHI_018390 PE=4 SV=1;>tr|C4M2T8|C4M2T8_ENTHI Uncharacterized protein OS=Entamoeba histolytica OX=5759 GN=EHI_077290 PE=4 SV=1
C4MB61	AIG1 family protein	EHI_144270	0.018271	0.0673157	6.52139	29.9539	21.654	28.7864	23.3101	28.3494	22.5615	1040000000	3300000	463000000	10400000	342000000	6190000					9	23.7	23.7	23.7	32.889	0	34.133	9	1	7	2	8	1	C4MB61	2002	>tr|C4MB61|C4MB61_ENTHI AIG1 family protein OS=Entamoeba histolytica OX=5759 GN=EHI_144270 PE=4 SV=1
C4LVK2	Uncharacterized protein	EHI_103580	0.0278866	0.0789038	6.51763	29.3724	21.0886	25.8044	19	26.2077	21.743	695000000	2230000	58600000	0	77500000	3510000					14	25.1	25.1	25.1	63.973	0	83.309	13	1	5	0	6	1	C4LVK2	546	>tr|C4LVK2|C4LVK2_ENTHI Uncharacterized protein OS=Entamoeba histolytica OX=5759 GN=EHI_103580 PE=4 SV=1
C4LWS3	ADP-ribosylglycohydrolase, putative	EHI_198770	0.00430201	0.0515364	6.51318	25.0526	19	26.3695	19	25.1174	19	34800000	0	86700000	0	36400000	0					3	8.8	8.8	8.8	49.821	0	7.3629	1	0	3	0	2	0	C4LWS3	685	>tr|C4LWS3|C4LWS3_ENTHI ADP-ribosylglycohydrolase, putative OS=Entamoeba histolytica OX=5759 GN=EHI_198770 PE=4 SV=1
C4LWZ7	Diphthine methyl ester synthase	EHI_127240	0.00324279	0.0488391	6.51033	25.9694	19	25.7871	19	24.7745	19	65700000	0	57900000	0	28700000	0			+	Plus DTT_Minus DTT	1	7.7	7.7	7.7	31.039	0	9.8633	1	0	1	0	1	0	C4LWZ7	712	>tr|C4LWZ7|C4LWZ7_ENTHI Diphthine methyl ester synthase OS=Entamoeba histolytica OX=5759 GN=EHI_127240 PE=1 SV=1
C4M4S8	Mitochondrial carrier protein	EHI_095150	0.000221506	0.0487947	6.50603	25.3376	19	25.673	19	25.5075	19	42400000	0	53500000	0	47700000	0			+	Plus DTT_Minus DTT	2	6.2	6.2	6.2	30.442	0	2.9856	1	0	2	0	1	0	C4M4S8	1480	>tr|C4M4S8|C4M4S8_ENTHI Mitochondrial carrier protein OS=Entamoeba histolytica OX=5759 GN=EHI_095150 PE=3 SV=1
B1N2V4	Galactose-inhibitable lectin small subunit, putative	EHI_159870	0.0151719	0.0644052	6.50418	30.4433	22.3184	29.6163	23.9316	29.158	23.4551	1460000000	5230000	823000000	16000000	599000000	11500000					11	45.5	45.5	45.5	30.789	0	59.951	10	2	10	3	9	2	B1N2V4	35	>tr|B1N2V4|B1N2V4_ENTHI Galactose-inhibitable lectin small subunit, putative OS=Entamoeba histolytica OX=5759 GN=EHI_159870 PE=2 SV=1
C4M3Z4	Uncharacterized protein	EHI_185260	0.00248904	0.0487947	6.50059	25.7796	19	25.8694	19	24.8528	19	57600000	0	61300000	0	30300000	0			+	Plus DTT_Minus DTT	2	2.8	2.8	2.8	81.936	0	4.1477	2	0	2	0	2	0	C4M3Z4	1403	>tr|C4M3Z4|C4M3Z4_ENTHI Uncharacterized protein OS=Entamoeba histolytica OX=5759 GN=EHI_185260 PE=4 SV=1
C4LU30	Uncharacterized protein	EHI_068370	0.0191359	0.0685111	6.50011	27.9923	21.9316	27.2535	19	27.1984	22.0122	267000000	4000000	160000000	0	154000000	4230000					6	17.6	17.6	17.6	52.804	0	15.366	5	1	4	0	5	1	C4LU30	383	>tr|C4LU30|C4LU30_ENTHI Uncharacterized protein OS=Entamoeba histolytica OX=5759 GN=EHI_068370 PE=4 SV=1
C4M3C6	Helicase, putative	EHI_053080	0.00811676	0.0559259	6.49775	27.17	21.8346	26.2445	19	25.9134	19	151000000	3740000	79500000	0	63200000	0					5	12.5	12.5	12.5	60.091	0	13.659	4	1	2	0	3	0	C4M3C6	1333	>tr|C4M3C6|C4M3C6_ENTHI Helicase, putative OS=Entamoeba histolytica OX=5759 GN=EHI_053080 PE=4 SV=1
C4M4D1	Ribonuclease, putative	EHI_156310	0.0179524	0.0664714	6.48789	32.3006	24.0609	31.0283	25.2499	30.6881	25.2426	5289999872	17500000	2190000128	39900000	1730000000	39700000					13	56.2	56.2	12	27.808	0	87.848	11	3	11	4	9	3	C4M4D1	1443	>tr|C4M4D1|C4M4D1_ENTHI Ribonuclease, putative OS=Entamoeba histolytica OX=5759 GN=EHI_156310 PE=2 SV=1
CON__P06868			0.0053283	0.0536181	4.24877	26.6998	22.976	27.1115	22.3101	26.4425	22.2214	109000000	8250000	145000000	5200000	91200000	4890000		+			8	11	11	11	91.215	0	23.241	7	2	7	1	5	2	CON__P06868	2079	>P06868 SWISS-PROT:P06868 (Bos taurus) Plasminogen precursor
C4M700	Protein kinase, putative	EHI_057680	0.0076799	0.0559259	6.47833	26.0955	19	24.3376	19	26.002	19	71700000	0	21200000	0	67200000	0					3	2.5	2.5	1.9	122.12	0.0012285	2.381	2	0	1	0	3	0	C4M700	1665	>tr|C4M700|C4M700_ENTHI Protein kinase, putative OS=Entamoeba histolytica OX=5759 GN=EHI_057680 PE=4 SV=1
B1N399	Uncharacterized protein	EHI_015420	0.0673584	0.127112	6.47392	31.1422	21.1704	30.0737	24.867	29.673	25.4298	2369999872	2360000	1130000000	30600000	856000000	45200000					20	31.4	31.4	31.4	85.153	0	83.93	18	1	17	5	17	7	B1N399	64	>tr|B1N399|B1N399_ENTHI Uncharacterized protein OS=Entamoeba histolytica OX=5759 GN=EHI_015420 PE=4 SV=1
C4MB38	Protein disulfide isomerase, putative	EHI_071590	0.0121625	0.0620459	6.4719	37.0266	29.1164	35.8328	30.0084	35.455	29.7739	140000002048	582000000	61199998976	1080000000	47099998208	918000000					42	75.5	75.5	75.5	41.725	0	323.31	40	21	41	21	41	20	C4MB38	2000	>tr|C4MB38|C4MB38_ENTHI Protein disulfide isomerase, putative OS=Entamoeba histolytica OX=5759 GN=EHI_071590 PE=3 SV=1
C4MB73	AIG1 family protein, putative	EHI_176580	0.00856271	0.0559259	6.47101	26.5696	19	25.3511	19	24.4923	19	99600000	0	42800000	0	23600000	0					3	28.9	10.5	10.5	35.48	0	7.1135	3	0	2	0	2	0	C4MB73	2005	>tr|C4MB73|C4MB73_ENTHI AIG1 family protein, putative OS=Entamoeba histolytica OX=5759 GN=EHI_176580 PE=4 SV=1
C4M171	Uncharacterized protein	EHI_107300	0.000443021	0.0487947	6.46422	25.6865	19	25.4892	19	25.217	19	54000000	0	47100000	0	39000000	0			+	Plus DTT_Minus DTT	3	14.2	14.2	14.2	33.896	0	38.733	3	0	2	0	3	0	C4M171	1124	>tr|C4M171|C4M171_ENTHI Uncharacterized protein OS=Entamoeba histolytica OX=5759 GN=EHI_107300 PE=4 SV=1
C4LZ56	Uncharacterized protein	EHI_104450	0.0225738	0.0721909	6.46046	30.5754	22.1457	29.5184	23.9134	29.2692	23.9225	1600000000	4640000	769000000	15800000	647000000	15900000					19	38.8	38.8	38.8	61.932	0	110.72	16	2	13	4	13	4	C4LZ56;B1N421	930	>tr|C4LZ56|C4LZ56_ENTHI Uncharacterized protein OS=Entamoeba histolytica OX=5759 GN=EHI_104450 PE=4 SV=1
C4M3X1	Leucine rich repeat protein, BspA family	EHI_016490	0.0278789	0.0789038	6.45986	27.6595	19	24.2463	19	24.4738	19	212000000	0	19900000	0	23300000	0					2	2.1	2.1	2.1	138.43	0.0012048	2.2056	2	0	1	0	1	0	C4M3X1	1393	>tr|C4M3X1|C4M3X1_ENTHI Leucine rich repeat protein, BspA family OS=Entamoeba histolytica OX=5759 GN=EHI_016490 PE=4 SV=1
CON__P17690			0.00559621	0.05403	4.91552	24.654	19	23.5404	19	23.5522	19	26400000	0	12200000	0	12300000	0	+	+			1	2.6	2.6	2.6	38.252	1	-2	1	0	1	0	1	0	CON__P17690	2090	>P17690 SWISS-PROT:P17690 (Bos taurus) Beta-2-glycoprotein 1 precursor
C4LW30	Threonylcarbamoyladenosine tRNA methylthiotransferase	EHI_141830	0.0091308	0.0559869	6.45188	29.8755	22.3538	28.6389	22.1765	28.3578	22.9864	985000000	5360000	418000000	4740000	344000000	8310000					15	34.7	34.7	34.7	48.927	0	66.08	14	2	13	1	11	2	C4LW30	612	>tr|C4LW30|C4LW30_ENTHI Threonylcarbamoyladenosine tRNA methylthiotransferase OS=Entamoeba histolytica OX=5759 GN=EHI_141830 PE=3 SV=1
C4LVI9	Actin binding protein, putative	EHI_103450	0.0139877	0.062705	6.44825	31.6415	23.6865	29.9259	23.9495	29.2803	23.867	3350000128	13500000	1020000000	16200000	652000000	15300000					15	49.6	49.6	49.6	43.652	0	50.289	14	3	10	3	8	2	C4LVI9	541	>tr|C4LVI9|C4LVI9_ENTHI Actin binding protein, putative OS=Entamoeba histolytica OX=5759 GN=EHI_103450 PE=4 SV=1
C4LSB2	Uncharacterized protein	EHI_153200	0.029665	0.0800732	6.43939	27.0401	19	25.4707	21.2243	26.0317	19	138000000	0	46500000	2450000	68600000	0					2	6.7	6.7	6.7	35.634	0	4.6336	2	0	1	1	2	0	C4LSB2	189	>tr|C4LSB2|C4LSB2_ENTHI Uncharacterized protein OS=Entamoeba histolytica OX=5759 GN=EHI_153200 PE=4 SV=1
C4M8D5	Amino acid transporter, putative	EHI_185430	0.0282533	0.0789181	6.43245	28.9977	21.391	28.2216	20.7553	28.0914	23.867	536000000	2750000	313000000	1770000	286000000	15300000					7	12.2	12.2	12.2	78.307	0	14.774	6	1	5	2	6	3	C4M8D5	1788	>tr|C4M8D5|C4M8D5_ENTHI Amino acid transporter, putative OS=Entamoeba histolytica OX=5759 GN=EHI_185430 PE=4 SV=1
Q5FIL6	Dipeptidase	LBA1646	0.0128629	0.0620854	6.42645	26.8974	19	24.7389	19	24.6431	19	125000000	0	28000000	0	26200000	0	+				1	2.7	2.7	2.7	53.856	1	-2	1	0	1	0	1	0	Q5FIL6	2204	>tr|Q5FIL6|Q5FIL6_LACAC Dipeptidase OS=Lactobacillus acidophilus (strain ATCC 700396 / NCK56 / N2 / NCFM) OX=272621 GN=LBA1646 PE=3 SV=1
P34107;C4LX20	Superoxide dismutase [Fe];Superoxide dismutase	SODB;EHI_159160	0.0207333	0.0702577	6.42491	35.5754	27.2714	34.3828	28.8593	33.9063	28.459	51200000000	162000000	22400000000	487000000	16099999744	369000000					13	70.5	70.5	70.5	22.06	0	117.29	13	7	11	7	11	7	P34107;C4LX20	718	>sp|P34107|SODF_ENTHI Superoxide dismutase [Fe] OS=Entamoeba histolytica OX=5759 GN=SODB PE=2 SV=1;>tr|C4LX20|C4LX20_ENTHI Superoxide dismutase OS=Entamoeba histolytica OX=5759 GN=EHI_159160 PE=2 SV=1
C4LTC4	Uncharacterized protein	EHI_045110	0.0101991	0.0587806	6.42136	26.6865	19	25.0732	19	24.5045	19	108000000	0	35300000	0	23800000	0					2	5.9	5.9	5.9	55.999	0	3.7541	2	0	2	0	1	0	C4LTC4	305	>tr|C4LTC4|C4LTC4_ENTHI Uncharacterized protein OS=Entamoeba histolytica OX=5759 GN=EHI_045110 PE=4 SV=1
CON__Q7Z3Z0			0.00579364	0.05403	-5.28763	19	23.48	19	24.7234	19	24.6595	0	11700000	0	27700000	0	26500000		+			1	21.3	4.2	4.2	49.317	0	3.2721	0	1	0	1	0	1	CON__Q7Z3Z0	2131	>Q7Z3Z0 SWISS-PROT:Q7Z3Z0 Tax_Id=9606 Gene_Symbol=KRT25 Keratin, type I cytoskeletal 25
C4LWX9	Ras guanine nucleotide exchange factor, putative	EHI_127040	0.0261567	0.0764132	6.41718	29.1214	22.1174	27.391	23.0292	26.8858	19	584000000	4550000	176000000	8560000	124000000	0					3	3.9	3.9	3.9	94.598	0	2.9445	3	2	2	2	1	0	C4LWX9	706	>tr|C4LWX9|C4LWX9_ENTHI Ras guanine nucleotide exchange factor, putative OS=Entamoeba histolytica OX=5759 GN=EHI_127040 PE=4 SV=1
C4LZZ7	Radical SAM domain protein	EHI_065810	0.0345994	0.0855011	6.41478	30.6881	21.8689	29.4214	23.7995	29.0349	24.2317	1730000000	3830000	719000000	14600000	550000000	19700000					14	31.6	31.6	31.6	39.577	0	35.045	13	1	12	3	11	5	C4LZZ7	1008	>tr|C4LZZ7|C4LZZ7_ENTHI Radical SAM domain protein OS=Entamoeba histolytica OX=5759 GN=EHI_065810 PE=2 SV=1
C4LWZ5	Synapsin, putative	EHI_127220	0.00389637	0.0502023	6.40769	25.452	19	26.0793	19	24.6918	19	45900000	0	70900000	0	27100000	0					3	13.1	13.1	13.1	36.252	0	3.3682	2	0	3	0	2	0	C4LWZ5	711	>tr|C4LWZ5|C4LWZ5_ENTHI Synapsin, putative OS=Entamoeba histolytica OX=5759 GN=EHI_127220 PE=3 SV=1
C4M1T0;B1N2N3	Phosphopantothenoylcysteine decarboxylase/phosphopantothenate--cysteine ligase, putative	EHI_164490	0.036023	0.0873244	6.40689	29.5609	20.654	28.6663	23.4923	28.2714	23.1316	792000000	1650000	426000000	11800000	324000000	9190000					9	22.9	22.9	22.9	43.496	0	35.464	9	1	7	3	8	3	C4M1T0;B1N2N3	1185	>tr|C4M1T0|C4M1T0_ENTHI Phosphopantothenoylcysteine decarboxylase/phosphopantothenate--cysteine ligase, putative OS=Entamoeba histolytica OX=5759 GN=EHI_164490 PE=3 SV=1;>tr|B1N2N3|B1N2N3_ENTHI Coenzyme A biosynthesis bifunctional protein coaBC, putative O
C4LTM5	Pumilio domain-containing protein C6G9.14, putative	EHI_012320	0.0081663	0.0559259	6.39799	26.7389	21.4874	26.143	19	25.7995	19	112000000	2940000	74100000	0	58400000	0					4	8.2	8.2	8.2	54.809	0	7.3683	3	1	3	0	3	0	C4LTM5	331	>tr|C4LTM5|C4LTM5_ENTHI Pumilio domain-containing protein C6G9.14, putative OS=Entamoeba histolytica OX=5759 GN=EHI_012320 PE=4 SV=1
C4LWN9	Uncharacterized protein	EHI_069510	0.0159495	0.0652139	6.39787	29.326	21.895	28.9814	22.002	28.5826	23.7995	673000000	3900000	530000000	4200000	402000000	14600000					4	43	43	43	17.044	0	37.731	4	1	4	1	4	2	C4LWN9	675	>tr|C4LWN9|C4LWN9_ENTHI Uncharacterized protein OS=Entamoeba histolytica OX=5759 GN=EHI_069510 PE=4 SV=1
B1N3H0;C4M4R7	mRNA (guanine-N(7)-)-methyltransferase	EHI_040480;EHI_095040	0.00610837	0.0540667	6.3947	29.21	22.1206	29.3745	22.6992	28.579	23.1596	621000000	4560000	696000000	6810000	401000000	9370000	+				1	6.7	6.7	6.7	24.312	1	-2	1	1	1	1	1	1	B1N3H0;C4M4R7	74	>tr|B1N3H0|B1N3H0_ENTHI mRNA (guanine-N(7)-)-methyltransferase OS=Entamoeba histolytica OX=5759 GN=EHI_040480 PE=3 SV=1;>tr|C4M4R7|C4M4R7_ENTHI mRNA (guanine-N(7)-)-methyltransferase OS=Entamoeba histolytica OX=5759 GN=EHI_095040 PE=3 SV=1
B1N4L3	Diacylglycerol O-acyltransferase	EHI_113590	0.0340515	0.0852501	6.39087	26.0874	19	27.0505	19	27.0401	23.0054	71300000	0	139000000	0	138000000	8420000					5	15.3	15.3	15.3	50.467	0	16.955	2	0	5	0	5	2	B1N4L3	135	>tr|B1N4L3|B1N4L3_ENTHI Diacylglycerol O-acyltransferase OS=Entamoeba histolytica OX=5759 GN=EHI_113590 PE=4 SV=1
C4LUF9	Uncharacterized protein	EHI_049580	0.00772175	0.0559259	6.37488	26.3204	19	25.433	19	24.3712	19	83800000	0	45300000	0	21700000	0					2	3.9	3.9	3.9	58.558	0	5.424	2	0	2	0	1	0	C4LUF9	425	>tr|C4LUF9|C4LUF9_ENTHI Uncharacterized protein OS=Entamoeba histolytica OX=5759 GN=EHI_049580 PE=4 SV=1
C4LYF8	Uncharacterized protein	EHI_093570	0.0185987	0.0674722	6.37163	27.0609	21.3805	27.1214	19	26.5433	21.2302	140000000	2730000	146000000	0	97800000	2460000					5	14.8	14.8	14.8	38.049	0	9.0093	4	1	5	0	5	1	C4LYF8	852	>tr|C4LYF8|C4LYF8_ENTHI Uncharacterized protein OS=Entamoeba histolytica OX=5759 GN=EHI_093570 PE=3 SV=1
C4M3N1	Phospholipid cytidylyltransferase, putative	EHI_140590	0.0131498	0.0620854	6.36645	31.7373	23.9406	31.1422	25.8019	30.5203	24.558	3580000000	16100000	2369999872	58500000	1540000000	24700000					15	45.5	45.5	45.5	38.984	0	45.265	14	4	12	6	12	3	C4M3N1	1364	>tr|C4M3N1|C4M3N1_ENTHI Phospholipid cytidylyltransferase, putative OS=Entamoeba histolytica OX=5759 GN=EHI_140590 PE=3 SV=1
B1N349	Uncharacterized protein	EHI_138000	0.013601	0.0622517	6.36601	26.5225	19	25.6153	19	25.7155	20.7553	96400000	0	51400000	0	55100000	1770000					3	5.9	5.9	5.9	59.078	0	3.5787	2	0	2	0	3	1	B1N349	51	>tr|B1N349|B1N349_ENTHI Uncharacterized protein OS=Entamoeba histolytica OX=5759 GN=EHI_138000 PE=4 SV=1
C4M2H3	Cysteine protease binding protein family 7	cpbf7	0.00697783	0.0559259	6.33966	32.9487	25.5841	32.4823	26.4057	31.9882	26.4105	8289999872	50300000	6000000000	88900000	4260000000	89200000					33	38.8	38.8	38.8	99.946	0	292.1	32	11	32	15	31	12	C4M2H3	1248	>tr|C4M2H3|C4M2H3_ENTHI Cysteine protease binding protein family 7 OS=Entamoeba histolytica OX=5759 GN=cpbf7 PE=2 SV=1
C4M5X1	Uncharacterized protein	EHI_136970	0.00731357	0.0559259	6.33141	24.7995	19	26.4202	19	24.7745	19	29200000	0	89800000	0	28700000	0	+				1	8.6	8.6	8.6	16.644	1	-2	1	0	1	0	1	0	C4M5X1	1580	>tr|C4M5X1|C4M5X1_ENTHI Uncharacterized protein OS=Entamoeba histolytica OX=5759 GN=EHI_136970 PE=4 SV=1
B1N3H5	Uncharacterized protein	EHI_006180	0.00667428	0.0550999	6.33065	26.0935	19	24.3376	19	25.5609	19	71600000	0	21200000	0	49500000	0					2	13.3	13.3	13.3	12.137	0	3.9614	2	0	1	0	2	0	B1N3H5	76	>tr|B1N3H5|B1N3H5_ENTHI Uncharacterized protein OS=Entamoeba histolytica OX=5759 GN=EHI_006180 PE=4 SV=1
C4M403	Uncharacterized protein	EHI_194980	0.00370485	0.0496409	6.29586	27.6798	20.6276	25.0359	19	24.7995	19	215000000	1620000	34400000	0	29200000	0			+	Plus DTT_Minus DTT	4	11.8	11.8	11.8	53.073	0	9.7375	2	1	2	0	3	0	C4M403	1409	>tr|C4M403|C4M403_ENTHI Uncharacterized protein OS=Entamoeba histolytica OX=5759 GN=EHI_194980 PE=4 SV=1
CON__Q1RMN8			0.00616103	0.0540667	5.30266	33.8042	28.258	33.5867	27.7129	33.2619	28.7739	15000000512	321000000	12899999744	220000000	10300000256	459000000		+			11	40.2	40.2	35	24.536	0	252.83	11	8	10	5	10	8	CON__Q1RMN8	2104	>Q1RMN8 TREMBL:Q1RMN8 (Bos taurus) Similar to Immunoglobulin lambda-like polypeptide 1
C4LUR1	Uncharacterized protein	EHI_178450	0.00443084	0.0515364	6.29443	26.1352	19	24.8811	19	24.867	19	73700000	0	30900000	0	30600000	0					3	5	5	3.5	71.42	0	6.2762	3	0	2	0	2	0	C4LUR1;C4M7H6	458	>tr|C4LUR1|C4LUR1_ENTHI Uncharacterized protein OS=Entamoeba histolytica OX=5759 GN=EHI_178450 PE=4 SV=1
C4M8F4	Uncharacterized protein	EHI_036510	0.0292046	0.0796902	6.28449	27.019	19	25.2996	21.0493	25.5841	19	136000000	0	41300000	2170000	50300000	0					2	5.2	5.2	5.2	50.848	0.0012107	2.2589	2	0	1	1	2	0	C4M8F4	1793	>tr|C4M8F4|C4M8F4_ENTHI Uncharacterized protein OS=Entamoeba histolytica OX=5759 GN=EHI_036510 PE=3 SV=1
Q26334	Protein kinase 2, putative	rac1	0.00573116	0.05403	6.2824	29.1604	23.0071	28.4823	21.3156	28.5014	22.9742	600000000	8430000	375000000	2610000	380000000	8240000					6	18.6	18.6	18.6	47.003	0	24.95	5	2	5	1	5	1	Q26334	2186	>tr|Q26334|Q26334_ENTHI Protein kinase 2, putative OS=Entamoeba histolytica OX=5759 GN=rac1 PE=3 SV=1
C4M5J8	Uncharacterized protein	EHI_001840	0.000328152	0.0487947	6.27069	25.0894	19	25.48	19	25.2426	19	35700000	0	46800000	0	39700000	0			+	Plus DTT_Minus DTT	2	6	6	6	29.93	0.0012277	2.3789	1	0	2	0	1	0	C4M5J8	1547	>tr|C4M5J8|C4M5J8_ENTHI Uncharacterized protein OS=Entamoeba histolytica OX=5759 GN=EHI_001840 PE=3 SV=1
C4LU87	Thioredoxin, putative	EHI_110350	0.0179523	0.0664714	6.26911	34.547	26.5754	33.02	27.6389	32.7613	27.3066	25099999232	100000000	8709999616	209000000	7280000000	166000000					31	47.6	47.6	47.6	59.061	0	251.85	31	9	28	13	29	12	C4LU87	403	>tr|C4LU87|C4LU87_ENTHI Thioredoxin, putative OS=Entamoeba histolytica OX=5759 GN=EHI_110350 PE=4 SV=1
C4M1A7	Uncharacterized protein	EHI_169840	0.0307504	0.081793	6.26567	27.1312	19	26.346	19.9243	25.8264	21.5823	147000000	0	85300000	995000	59500000	3140000					2	14.2	14.2	14.2	16.666	0	2.8061	2	0	2	1	2	1	C4M1A7	1134	>tr|C4M1A7|C4M1A7_ENTHI Uncharacterized protein OS=Entamoeba histolytica OX=5759 GN=EHI_169840 PE=3 SV=1
C4LV94	SH3 domain-containing protein	EHI_183230	0.0644024	0.123433	6.26488	28.4073	19	28.459	24.7543	27.17	21.4874	356000000	0	369000000	28300000	151000000	2940000	+				1	3.9	3.9	3.9	33.156	1	-2	1	0	1	1	1	1	C4LV94	509	>tr|C4LV94|C4LV94_ENTHI SH3 domain-containing protein OS=Entamoeba histolytica OX=5759 GN=EHI_183230 PE=4 SV=1
C4M769	Uncharacterized protein	EHI_199580	0.080031	0.142711	6.26133	29.0296	19	23.5404	19	23.214	19	548000000	0	12200000	0	9730000	0	+				2	8.1	8.1	8.1	27.454	1	-2	2	0	1	0	2	0	C4M769	1687	>tr|C4M769|C4M769_ENTHI Uncharacterized protein OS=Entamoeba histolytica OX=5759 GN=EHI_199580 PE=4 SV=1
C4M3Q6	Uncharacterized protein	EHI_146120	0.00271248	0.0487947	6.25956	25.8336	19	25.2426	19	24.7024	19	59800000	0	39700000	0	27300000	0			+	Plus DTT_Minus DTT	1	8.5	8.5	8.5	23.703	0	13.467	1	0	1	0	1	0	C4M3Q6	1372	>tr|C4M3Q6|C4M3Q6_ENTHI Uncharacterized protein OS=Entamoeba histolytica OX=5759 GN=EHI_146120 PE=4 SV=1
C4M128	BAR/SH3 domain containing protein	EHI_105240	0.0129424	0.0620854	6.2573	25.8858	19	26.0629	19	25.2607	20.4375	62000000	0	70100000	0	40200000	1420000					3	4.9	4.9	4.9	65.842	0	5.165	2	0	3	0	2	1	C4M128	1115	>tr|C4M128|C4M128_ENTHI BAR/SH3 domain containing protein OS=Entamoeba histolytica OX=5759 GN=EHI_105240 PE=4 SV=1
C4MBQ8	Rho guanine nucleotide exchange factor, putative	EHI_015110	0.00469796	0.0515735	6.24706	26.0505	19	25.1095	19	24.5812	19	69500000	0	36200000	0	25100000	0					1	3.9	3.9	3.9	30.344	0.0040207	1.8928	1	0	1	0	1	0	C4MBQ8	2036	>tr|C4MBQ8|C4MBQ8_ENTHI Rho guanine nucleotide exchange factor, putative OS=Entamoeba histolytica OX=5759 GN=EHI_015110 PE=4 SV=1
C4M9L6;B1N5S9;B1N2Q3;C4M9R4;C4LUJ7	Uncharacterized protein;Iron-sulfur flavoprotein, putative (Fragment)	EHI_022270;EHI_181710	0.00232243	0.0487947	6.23091	25.7441	19	25.2463	19	24.7024	19	56200000	0	39800000	0	27300000	0			+	Plus DTT_Minus DTT	1	5.8	5.8	5.8	17.307	0	3.4738	1	0	1	0	1	0	C4M9L6;B1N5S9;B1N2Q3;C4M9R4;C4LUJ7	29	>tr|C4M9L6|C4M9L6_ENTHI Uncharacterized protein OS=Entamoeba histolytica OX=5759 GN=EHI_022270 PE=4 SV=1;>tr|B1N5S9|B1N5S9_ENTHI Iron-sulfur flavoprotein, putative (Fragment) OS=Entamoeba histolytica OX=5759 GN=EHI_181710 PE=4 SV=1;>tr|B1N2Q3|B1N2Q3_ENTHI
C4MB76;B1N3S0	Fumarate hydratase class I, anaerobic, putative (Fragment);Fumarate hydratase class I, anaerobic, putative	EHI_117270;EHI_0350	0.0146132	0.0633714	6.22845	31.4083	23.6971	29.8142	24.0275	29.8415	24.654	2849999872	13600000	944000000	17100000	962000000	26400000					11	65	65	65	22.312	0	59.885	10	2	9	2	8	2	C4MB76;B1N3S0	2007	>tr|C4MB76|C4MB76_ENTHI Fumarate hydratase class I, anaerobic, putative (Fragment) OS=Entamoeba histolytica OX=5759 GN=EHI_117270 PE=3 SV=1;>tr|B1N3S0|B1N3S0_ENTHI Fumarate hydratase class I, anaerobic, putative OS=Entamoeba histolytica OX=5759 GN=EHI_0350
C4M3H4	Uncharacterized protein	EHI_138310	0.00186887	0.0487947	6.22792	25.7415	19	25.1135	19	24.8288	19	56100000	0	36300000	0	29800000	0			+	Plus DTT_Minus DTT	1	3.8	3.8	3.8	32.476	0	2.9308	1	0	1	0	1	0	C4M3H4	1347	>tr|C4M3H4|C4M3H4_ENTHI Uncharacterized protein OS=Entamoeba histolytica OX=5759 GN=EHI_138310 PE=4 SV=1
C4MA09	60S ribosomal protein L7, putative	EHI_146530	0.0208706	0.0702577	6.21704	31.7533	23.7492	29.8682	24.2243	29.0557	24.0526	3620000000	14100000	980000000	19600000	558000000	17400000					5	63.5	28.3	23	25.721	0	31.031	5	2	5	2	5	2	C4MA09	1937	>tr|C4MA09|C4MA09_ENTHI 60S ribosomal protein L7, putative OS=Entamoeba histolytica OX=5759 GN=EHI_146530 PE=2 SV=1
Q5NT22	Rab family GTPase (Fragment)	EhRabK3	0.0384928	0.0893755	6.21521	26.632	19	26.3031	19	25.7796	22.0691	104000000	0	82800000	0	57600000	4400000					3	8.2	8.2	8.2	26.242	0	3.9328	2	0	3	0	3	1	Q5NT22	2262	>tr|Q5NT22|Q5NT22_ENTHI Rab family GTPase (Fragment) OS=Entamoeba histolytica OX=5759 GN=EhRabK3 PE=3 SV=1
C4M3X0	Calcium-transporting ATPase	EHI_016480	0.00542882	0.0538737	6.21515	28.9705	21.9024	28.976	22.8895	28.5014	23.0105	526000000	3920000	528000000	7770000	380000000	8450000					9	32.4	11.1	11.1	119.13	0	26.807	7	1	8	2	9	1	C4M3X0	1392	>tr|C4M3X0|C4M3X0_ENTHI Calcium-transporting ATPase OS=Entamoeba histolytica OX=5759 GN=EHI_016480 PE=3 SV=1
C4LWC9	Uncharacterized protein	EHI_096160	0.0119785	0.0620459	6.2107	26.3342	19	25.3307	19	23.9672	19	84600000	0	42200000	0	16400000	0	+				1	4.9	4.9	4.9	16.592	1	-2	1	0	1	0	1	0	C4LWC9	643	>tr|C4LWC9|C4LWC9_ENTHI Uncharacterized protein OS=Entamoeba histolytica OX=5759 GN=EHI_096160 PE=4 SV=1
C4LV46	Uncharacterized protein	EHI_182650	0.00853457	0.0559259	6.20585	26.3595	19	24.604	19	24.654	19	86100000	0	25500000	0	26400000	0					3	8.9	8.9	8.9	44.902	0	4.2359	2	0	2	0	1	0	C4LV46	495	>tr|C4LV46|C4LV46_ENTHI Uncharacterized protein OS=Entamoeba histolytica OX=5759 GN=EHI_182650 PE=4 SV=1
C4LWX8	Pept_C1 domain-containing protein	EHI_127030	0.0112426	0.0602737	6.20136	31.6372	24.9672	31.4967	24.4551	30.7453	25.8528	3340000000	32800000	3030000128	23000000	1800000000	60600000					21	44.7	44.7	44.7	57.953	0	114.15	20	6	21	4	19	8	C4LWX8	705	>tr|C4LWX8|C4LWX8_ENTHI Pept_C1 domain-containing protein OS=Entamoeba histolytica OX=5759 GN=EHI_127030 PE=3 SV=1
C4LU10	Radical SAM domain protein	EHI_068170	0.0296727	0.0800732	6.19323	31.4871	23.1238	29.7692	24.8623	29.5844	24.275	3009999872	9140000	915000000	30500000	805000000	20300000					8	23.7	23.7	23.7	43.186	0	70.037	8	2	8	3	8	3	C4LU10	376	>tr|C4LU10|C4LU10_ENTHI Radical SAM domain protein OS=Entamoeba histolytica OX=5759 GN=EHI_068170 PE=2 SV=1
C4M7M4	Cell surface protease gp63, putative	EHI_200230	0.00591182	0.0540667	6.19193	31.3088	24.3239	30.4532	24.1946	30.3724	25.0401	2660000000	21000000	1470000000	19200000	1390000000	34500000					16	32.7	32.7	32.7	71.563	0	236.57	15	4	12	3	13	5	C4M7M4	1730	>tr|C4M7M4|C4M7M4_ENTHI Cell surface protease gp63, putative OS=Entamoeba histolytica OX=5759 GN=EHI_200230 PE=3 SV=1
C4M897	Uncharacterized protein	EHI_019100	0.00499971	0.0515942	6.19132	25.9869	20.6714	25.6918	19	25.5667	19	66500000	1670000	54200000	0	49700000	0					2	7.2	7.2	7.2	35.37	0	3.0629	2	1	2	0	2	0	C4M897	1776	>tr|C4M897|C4M897_ENTHI Uncharacterized protein OS=Entamoeba histolytica OX=5759 GN=EHI_019100 PE=4 SV=1
C4M611	Thioredoxin domain-containing protein	EHI_072060	0.0232126	0.0729773	6.18156	31.7292	23.6649	30.099	25.1719	30.0084	24.4551	3560000000	13300000	1150000000	37800000	1080000000	23000000					21	45.9	45.9	45.9	57.945	0	108.18	21	3	15	6	17	5	C4M611	1589	>tr|C4M611|C4M611_ENTHI Thioredoxin domain-containing protein OS=Entamoeba histolytica OX=5759 GN=EHI_072060 PE=4 SV=1
C4M6N6	Uncharacterized protein	EHI_161930	0.0642432	0.123234	6.17526	25.9562	19	27.5536	19	26.9203	23.9043	65100000	0	197000000	0	127000000	15700000					2	13.8	13.8	13.8	31.904	0	40.354	1	0	2	0	2	1	C4M6N6	1641	>tr|C4M6N6|C4M6N6_ENTHI Uncharacterized protein OS=Entamoeba histolytica OX=5759 GN=EHI_161930 PE=2 SV=1
C4MBS5	AIG1 family protein	EHI_089670	0.00934076	0.0567318	6.17334	26.3545	19	24.7745	19	24.391	19	85800000	0	28700000	0	22000000	0					1	5.4	2.6	2.6	42.226	0.0049972	1.6527	1	0	1	0	1	0	C4MBS5	2040	>tr|C4MBS5|C4MBS5_ENTHI AIG1 family protein OS=Entamoeba histolytica OX=5759 GN=EHI_089670 PE=4 SV=1
C4LZY7	Uncharacterized protein	EHI_065710	0.015834	0.0652032	6.14963	30.7211	23.4425	29.6285	23.1031	29.3992	24.7543	1770000000	11400000	830000000	9010000	708000000	28300000					12	61	61	61	22.031	0	57.397	12	3	10	2	10	6	C4LZY7	1004	>tr|C4LZY7|C4LZY7_ENTHI Uncharacterized protein OS=Entamoeba histolytica OX=5759 GN=EHI_065710 PE=4 SV=1
C4M512	Acid phosphatase, putative	EHI_141060	0.0044761	0.0515364	6.1487	25.9738	19	24.7129	19	24.7594	19	65900000	0	27500000	0	28400000	0					3	8.1	8.1	8.1	47.46	0	2.9626	3	0	1	0	1	0	C4M512	1497	>tr|C4M512|C4M512_ENTHI Acid phosphatase, putative OS=Entamoeba histolytica OX=5759 GN=EHI_141060 PE=4 SV=1
C4LWA4	Chromosome partition protein, putative	EHI_155530	0.00266988	0.0487947	6.14245	25.6998	19	24.5983	19	25.1293	19	54500000	0	25400000	0	36700000	0			+	Plus DTT_Minus DTT	3	2.3	2.3	2.3	120.74	0.0059783	1.4834	2	0	1	0	2	0	C4LWA4;B1N4I7	632	>tr|C4LWA4|C4LWA4_ENTHI Chromosome partition protein, putative OS=Entamoeba histolytica OX=5759 GN=EHI_155530 PE=4 SV=1
C4LVK0	COP9 signalosome complex subunit 3, putative	EHI_103560	0.0613713	0.119473	6.14245	26.6998	19	26.7771	19	25.7441	22.7935	109000000	0	115000000	0	56200000	7270000					4	11.8	11.8	11.8	45.022	0	8.9754	3	0	4	0	3	2	C4LVK0	545	>tr|C4LVK0|C4LVK0_ENTHI COP9 signalosome complex subunit 3, putative OS=Entamoeba histolytica OX=5759 GN=EHI_103560 PE=4 SV=1
C4MBG5	Uncharacterized protein	EHI_147230	0.00832773	0.0559259	6.13706	26.2571	19	24.6865	19	24.4676	19	80200000	0	27000000	0	23200000	0					1	8.6	8.6	8.6	16.775	0	2.9864	1	0	1	0	1	0	C4MBG5	2027	>tr|C4MBG5|C4MBG5_ENTHI Uncharacterized protein OS=Entamoeba histolytica OX=5759 GN=EHI_147230 PE=4 SV=1
B1N5A6	Uncharacterized protein (Fragment)	EHI_154450	0.0317438	0.0825297	6.13323	34.3502	25.9847	32.6798	27.8142	32.6	27.4314	21899999232	66400000	6880000000	236000000	6510000128	181000000					17	66.9	66.9	66.9	27.133	0	148.23	17	5	15	7	16	8	B1N5A6	164	>tr|B1N5A6|B1N5A6_ENTHI Uncharacterized protein (Fragment) OS=Entamoeba histolytica OX=5759 GN=EHI_154450 PE=4 SV=1
C4LSY3;B1N2K7	Beta-hexosaminidase;Beta-N-acetylhexosaminidase	EHI_148130;EHI_110500	0.0428863	0.0957851	6.13265	29.4093	20.7553	28.2847	22.7796	27.8142	23.5754	713000000	1770000	327000000	7200000	236000000	12500000					8	17.5	17.5	17.5	61.054	0	22.664	8	1	6	1	7	3	C4LSY3;B1N2K7	261	>tr|C4LSY3|C4LSY3_ENTHI Beta-hexosaminidase OS=Entamoeba histolytica OX=5759 GN=EHI_148130 PE=3 SV=1;>tr|B1N2K7|B1N2K7_ENTHI Beta-N-acetylhexosaminidase OS=Entamoeba histolytica OX=5759 GN=EHI_110500 PE=3 SV=1
C4LZV4	Isopentenyl-diphosphate delta-isomerase, putative	EHI_194410	0.0316111	0.0825297	6.11722	30.0479	21.7836	28.2445	22.6843	28.0557	23.5285	1110000000	3610000	318000000	6740000	279000000	12100000					6	24.6	24.6	24.6	39.339	0	77.568	6	1	6	1	6	2	C4LZV4	991	>tr|C4LZV4|C4LZV4_ENTHI Isopentenyl-diphosphate delta-isomerase, putative OS=Entamoeba histolytica OX=5759 GN=EHI_194410 PE=2 SV=1
C4LUJ2	Ubiquitin carboxyl-terminal hydrolase	EHI_049940	0.00777215	0.0559259	6.10714	31.2135	24.1015	30.8682	24.9134	30.3196	25.065	2489999872	18000000	1960000000	31600000	1340000000	35100000					22	32.3	32.3	32.3	82.089	0	89.186	20	3	21	6	21	5	C4LUJ2	433	>tr|C4LUJ2|C4LUJ2_ENTHI Ubiquitin carboxyl-terminal hydrolase OS=Entamoeba histolytica OX=5759 GN=EHI_049940 PE=3 SV=1
C4M4N5;B1N2U9	RhoGAP domain containing protein	EHI_189510;EHI_159720	0.015133	0.064373	6.10493	24.8528	19	26.1927	21.2593	26.5285	19	30300000	0	76700000	2510000	96800000	0					4	7.8	7.8	7.8	60.766	0	4.4798	1	0	3	2	3	0	C4M4N5;B1N2U9	1472	>tr|C4M4N5|C4M4N5_ENTHI RhoGAP domain containing protein OS=Entamoeba histolytica OX=5759 GN=EHI_189510 PE=4 SV=1;>tr|B1N2U9|B1N2U9_ENTHI RhoGAP domain containing protein OS=Entamoeba histolytica OX=5759 GN=EHI_159720 PE=4 SV=1
C4M7D3	Uncharacterized protein	EHI_011200	0.00875352	0.0559259	6.10135	26.2463	19	24.6153	19	24.4425	19	79600000	0	25700000	0	22800000	0					1	3.8	3.8	3.8	39.531	0.0012143	2.2715	1	0	1	0	1	0	C4M7D3	1708	>tr|C4M7D3|C4M7D3_ENTHI Uncharacterized protein OS=Entamoeba histolytica OX=5759 GN=EHI_011200 PE=4 SV=1
B1N4A4;C4M5L3	Alpha-1,3/1,6-mannosyltransferase ALG2	EHI_162230;EHI_001990	0.0212212	0.0704949	6.09889	32.0832	24.1795	31.2077	25.9606	30.6713	25.5255	4550000128	19000000	2480000000	65300000	1710000000	48300000					16	37.6	37.6	37.6	38.79	0	82.019	15	3	15	6	14	5	B1N4A4;C4M5L3	120	>tr|B1N4A4|B1N4A4_ENTHI Alpha-1,3/1,6-mannosyltransferase ALG2 OS=Entamoeba histolytica OX=5759 GN=EHI_162230 PE=3 SV=1;>tr|C4M5L3|C4M5L3_ENTHI Alpha-1,3/1,6-mannosyltransferase ALG2 OS=Entamoeba histolytica OX=5759 GN=EHI_001990 PE=3 SV=1
C4M1Y3	Rab family GTPase	EHI_164900	0.0154026	0.0644658	6.09849	25.2058	19	26.3679	19	25.5869	20.8651	38700000	0	86600000	0	50400000	1910000					4	14.4	14.4	14.4	30.133	0	7.367	3	0	2	0	2	1	C4M1Y3	1203	>tr|C4M1Y3|C4M1Y3_ENTHI Rab family GTPase OS=Entamoeba histolytica OX=5759 GN=EHI_164900 PE=3 SV=1
C4M5M1	Uncharacterized protein	EHI_122900	0.0229478	0.0727745	6.09038	29.3536	21.3857	27.9869	22.8132	27.5898	22.4601	686000000	2740000	266000000	7370000	202000000	5770000					1	1.5	1.5	1.5	74.054	0	2.8321	1	1	1	1	1	1	C4M5M1	1550	>tr|C4M5M1|C4M5M1_ENTHI Uncharacterized protein OS=Entamoeba histolytica OX=5759 GN=EHI_122900 PE=4 SV=1
C4M8N5	Uncharacterized protein	EHI_077530	0.00600166	0.0540667	6.08699	29.3807	22.6051	26.5754	21.3962	28.1214	21.8152	699000000	6380000	100000000	2760000	292000000	3690000					4	25.2	25.2	25.2	23.074	0	84.582	3	2	2	1	3	1	C4M8N5	1816	>tr|C4M8N5|C4M8N5_ENTHI Uncharacterized protein OS=Entamoeba histolytica OX=5759 GN=EHI_077530 PE=4 SV=1
C4LYZ1	Uncharacterized protein	EHI_118070	0.00479982	0.0515735	6.08388	29.995	23.0691	28.6424	23.0509	28.805	23.0707	1070000000	8800000	419000000	8690000	469000000	8810000					9	13.4	13.4	13.4	86.614	0	32.191	8	2	7	2	9	1	C4LYZ1	911	>tr|C4LYZ1|C4LYZ1_ENTHI Uncharacterized protein OS=Entamoeba histolytica OX=5759 GN=EHI_118070 PE=4 SV=1
B1N4L5	Uncharacterized protein	EHI_129370	0.0510616	0.106141	6.07756	27.8264	19	27.2625	23.2346	27.17	21.7915	238000000	0	161000000	9870000	151000000	3630000					1	11.2	11.2	11.2	13.89	0.0012837	2.7557	1	0	1	1	1	1	B1N4L5	136	>tr|B1N4L5|B1N4L5_ENTHI Uncharacterized protein OS=Entamoeba histolytica OX=5759 GN=EHI_129370 PE=4 SV=1
C4LYT1	Uncharacterized protein	EHI_010340	0.00836362	0.0559259	6.07425	32.0414	25.4769	31.5664	24.867	31.0544	26.0955	4419999744	46700000	3180000000	30600000	2230000128	71700000					14	27.3	27.3	27.3	64.06	0	124.94	14	5	12	6	13	10	C4LYT1;B1N312	896	>tr|C4LYT1|C4LYT1_ENTHI Uncharacterized protein OS=Entamoeba histolytica OX=5759 GN=EHI_010340 PE=4 SV=1
C4LTL2	Brix domain containing protein	EHI_012190	0.0515009	0.106489	6.07263	27.9372	19	25.9825	21.4676	26.2679	21.502	257000000	0	66300000	2900000	80800000	2970000					4	11.3	11.3	11.3	41.363	0	6.7534	4	0	3	1	3	1	C4LTL2	325	>tr|C4LTL2|C4LTL2_ENTHI Brix domain containing protein OS=Entamoeba histolytica OX=5759 GN=EHI_012190 PE=4 SV=1
B1N412	Uncharacterized protein	EHI_139380	0.00118497	0.0487947	6.05717	25.4551	19	24.9672	19	24.7492	19	46000000	0	32800000	0	28200000	0			+	Plus DTT_Minus DTT	1	7.5	7.5	7.5	17.602	0	2.9143	1	0	1	0	1	0	B1N412	106	>tr|B1N412|B1N412_ENTHI Uncharacterized protein OS=Entamoeba histolytica OX=5759 GN=EHI_139380 PE=4 SV=1
C4LUE8	Uncharacterized protein	EHI_049470	0.0282329	0.0789181	6.05139	26.7645	19	25.2133	19	23.1765	19	114000000	0	38900000	0	9480000	0					1	1.9	1.9	1.9	104.87	0	2.913	1	0	1	0	1	0	C4LUE8	422	>tr|C4LUE8|C4LUE8_ENTHI Uncharacterized protein OS=Entamoeba histolytica OX=5759 GN=EHI_049470 PE=4 SV=1
C4LXL8	Leucine-rich repeat containing protein	EHI_073580	0.022223	0.0720267	6.05101	29.6747	23.4551	29.6181	22.0691	29.0762	24.6918	857000000	11500000	824000000	4400000	566000000	27100000					13	22.8	22.8	22.8	55.918	0	27.804	10	4	12	1	10	3	C4LXL8	781	>tr|C4LXL8|C4LXL8_ENTHI Leucine-rich repeat containing protein OS=Entamoeba histolytica OX=5759 GN=EHI_073580 PE=3 SV=1
C4LU45	Uncharacterized protein	EHI_068540	0.192715	0.267653	6.04966	29.4492	19	19	19	26.6998	19	733000000	0	0	0	109000000	0	+				1	1.8	1.8	1.8	113.94	1	-2	1	0	0	0	1	0	C4LU45	388	>tr|C4LU45|C4LU45_ENTHI Uncharacterized protein OS=Entamoeba histolytica OX=5759 GN=EHI_068540 PE=4 SV=1
C4LV59	Ras GTPase-activating protein, putative	EHI_182780	0.0111842	0.0602737	6.03471	31.1783	23.8576	30.5573	25.1174	30.1724	24.8288	2430000128	15200000	1580000000	36400000	1210000000	29800000					25	45.2	45.2	45.2	65.173	0	135.91	21	6	25	8	23	7	C4LV59	501	>tr|C4LV59|C4LV59_ENTHI Ras GTPase-activating protein, putative OS=Entamoeba histolytica OX=5759 GN=EHI_182780 PE=4 SV=1
C4LSG4	Uncharacterized protein	EHI_151200	0.0513882	0.106454	6.03008	27.019	19	26.0275	22.7533	25.797	19	136000000	0	68400000	7070000	58300000	0					2	5.7	5.7	5.7	51.133	0	3.3254	2	0	1	1	2	0	C4LSG4	206	>tr|C4LSG4|C4LSG4_ENTHI Uncharacterized protein OS=Entamoeba histolytica OX=5759 GN=EHI_151200 PE=4 SV=1
B1N4P2	Uncharacterized protein	EHI_075200	0.01182	0.0618434	6.0275	28.4354	21.8152	27.8564	21.1015	27.3745	22.6671	363000000	3690000	243000000	2250000	174000000	6660000					4	18.6	18.6	18.6	28.19	0	30.787	4	1	3	1	3	1	B1N4P2	140	>tr|B1N4P2|B1N4P2_ENTHI Uncharacterized protein OS=Entamoeba histolytica OX=5759 GN=EHI_075200 PE=4 SV=1
C4M1B6	DCB domain-containing protein	EHI_169940	0.063944	0.122766	6.02144	28.019	19	28.2399	22.7451	27.2262	23.6757	272000000	0	317000000	7030000	157000000	13400000					6	5.4	5.4	5.4	138.48	0	14.244	6	0	6	2	5	3	C4M1B6	1136	>tr|C4M1B6|C4M1B6_ENTHI DCB domain-containing protein OS=Entamoeba histolytica OX=5759 GN=EHI_169940 PE=4 SV=1
Q5FI95	Zinc ABC transporter ATPase protein	LBA1772	0.0441963	0.0977318	6.01973	26.976	19	25.5492	19	25.6703	22.1363	132000000	0	49100000	0	53400000	4610000					1	5.1	5.1	5.1	24.357	0.0085016	1.3697	1	0	1	0	1	1	Q5FI95	2200	>tr|Q5FI95|Q5FI95_LACAC Zinc ABC transporter ATPase protein OS=Lactobacillus acidophilus (strain ATCC 700396 / NCK56 / N2 / NCFM) OX=272621 GN=LBA1772 PE=4 SV=1
C4M7X1	Uncharacterized protein	EHI_047800	0.00303203	0.0488391	6.01854	32.8252	26.1527	32.2365	26.6458	31.7771	25.9847	7609999872	74600000	5059999744	105000000	3680000000	66400000			+	Plus DTT_Minus DTT	16	51.3	51.3	51.3	34.017	0	223.66	15	6	15	9	13	7	C4M7X1	1751	>tr|C4M7X1|C4M7X1_ENTHI Uncharacterized protein OS=Entamoeba histolytica OX=5759 GN=EHI_047800 PE=2 SV=1
C4LUA8	Leucine rich repeat protein, BspA family	EHI_110590	0.0175455	0.0664316	6.01731	26.0629	19	25.5609	19	25.3811	20.953	70100000	0	49500000	0	43700000	2030000	+				1	0.8	0.8	0.8	96.056	1	-2	1	0	1	0	1	1	C4LUA8	410	>tr|C4LUA8|C4LUA8_ENTHI Leucine rich repeat protein, BspA family OS=Entamoeba histolytica OX=5759 GN=EHI_110590 PE=4 SV=1
C4M8B8	Protein tyrosine kinase domain-containing protein	EHI_101280	0.0155553	0.0646174	6.01027	31.8119	24.4614	30.7047	24.7492	30.6198	25.895	3769999872	23100000	1750000000	28200000	1650000000	62400000					23	26.1	21.2	16.5	133.91	0	91.218	20	7	22	7	22	11	C4M8B8;C4MA43	1783	>tr|C4M8B8|C4M8B8_ENTHI Protein tyrosine kinase domain-containing protein OS=Entamoeba histolytica OX=5759 GN=EHI_101280 PE=4 SV=1
C4LWK8	Uncharacterized protein	EHI_069200	0.00212892	0.0487947	6.00059	25.5551	19	24.7129	19	24.7338	19	49300000	0	27500000	0	27900000	0			+	Plus DTT_Minus DTT	1	9.3	9.3	9.3	21.378	0	3.631	1	0	1	0	1	0	C4LWK8	664	>tr|C4LWK8|C4LWK8_ENTHI Uncharacterized protein OS=Entamoeba histolytica OX=5759 GN=EHI_069200 PE=4 SV=1
C4M4C4	Competence protein ComEC, putative	EHI_156240	0.0013441	0.0487947	5.99736	25.3578	19	25.0359	19	24.5983	19	43000000	0	34400000	0	25400000	0			+	Plus DTT_Minus DTT	2	6.1	6.1	6.1	41.795	0.0011919	2.145	1	0	2	0	2	0	C4M4C4	1441	>tr|C4M4C4|C4M4C4_ENTHI Competence protein ComEC, putative OS=Entamoeba histolytica OX=5759 GN=EHI_156240 PE=4 SV=1
C4M0H3	WH2 domain-containing protein	EHI_007000	0.0335115	0.0847868	5.99341	27.391	21.5117	26.9977	19	26.2979	22.1946	176000000	2990000	134000000	0	82500000	4800000					2	4.1	4.1	4.1	51.256	0.0040486	1.9268	2	1	2	0	1	1	C4M0H3	1060	>tr|C4M0H3|C4M0H3_ENTHI WH2 domain-containing protein OS=Entamoeba histolytica OX=5759 GN=EHI_007000 PE=4 SV=1
C4M134	Cell division control protein, putative	EHI_105300	0.00224772	0.0487947	5.99261	25.3943	19	24.4425	19	25.141	19	44100000	0	22800000	0	37000000	0			+	Plus DTT_Minus DTT	2	7.3	7.3	7.3	35.517	0.0090234	1.368	1	0	2	0	1	0	C4M134	1118	>tr|C4M134|C4M134_ENTHI Cell division control protein, putative OS=Entamoeba histolytica OX=5759 GN=EHI_105300 PE=3 SV=1
C4M7E7	Competence protein ComEC, putative	EHI_166400	0.00122406	0.0487947	5.99168	25.4041	19	24.8528	19	24.7182	19	44400000	0	30300000	0	27600000	0			+	Plus DTT_Minus DTT	2	5	5	5	45.325	0	3.2425	2	0	2	0	2	0	C4M7E7	1711	>tr|C4M7E7|C4M7E7_ENTHI Competence protein ComEC, putative OS=Entamoeba histolytica OX=5759 GN=EHI_166400 PE=4 SV=1
C4M1T2;B1N3U8	Uncharacterized protein	EHI_027330;EHI_111010	0.00555006	0.05403	5.9916	25.8576	19	24.3578	19	24.7594	19	60800000	0	21500000	0	28400000	0					2	14.9	14.9	14.9	18.512	0	3.8013	2	0	2	0	2	0	C4M1T2;B1N3U8	1187	>tr|C4M1T2|C4M1T2_ENTHI Uncharacterized protein OS=Entamoeba histolytica OX=5759 GN=EHI_027330 PE=4 SV=1;>tr|B1N3U8|B1N3U8_ENTHI Uncharacterized protein OS=Entamoeba histolytica OX=5759 GN=EHI_111010 PE=4 SV=1
C4M1E2	Cysteine protease, putative	EHI_030720	0.00634437	0.0546008	5.98541	25.8788	19	24.8385	19	24.239	19	61700000	0	30000000	0	19800000	0					2	5	5	5	50.436	0	2.8036	2	0	2	0	2	0	C4M1E2	1144	>tr|C4M1E2|C4M1E2_ENTHI Cysteine protease, putative OS=Entamoeba histolytica OX=5759 GN=EHI_030720 PE=3 SV=1
CON__P01966			0.0081327	0.0559259	-2.58637	19	21.4221	19	21.2877	19	22.0493	0	2810000	0	2560000	0	4340000		+			2	11.3	11.3	11.3	15.184	0.005975	1.4822	1	1	0	1	0	1	CON__P01966	2064	>P01966 SWISS-PROT:P01966 (Bos taurus) Hemoglobin subunit alpha
C4M8F5	Importin beta, putative	EHI_036520	0.0232018	0.0729773	5.97719	29.0609	21.4221	28.8264	24.391	28.5609	22.7035	560000000	2810000	476000000	22000000	396000000	6830000					10	13.6	13.6	13.6	94.527	0	25.384	9	2	10	5	10	2	C4M8F5	1794	>tr|C4M8F5|C4M8F5_ENTHI Importin beta, putative OS=Entamoeba histolytica OX=5759 GN=EHI_036520 PE=4 SV=1
B1N3E1;B1N419	Galactose binding lectin 35 kDa subunit, putative;Galactose-inhibitable lectin 35 kDa subunit, putative	EHI_027800;EHI_183400	0.0079338	0.0559259	5.97075	25.7363	19	25.2353	19	23.9406	19	55900000	0	39500000	0	16100000	0					2	31.9	7.3	7.3	30.807	0.0094587	1.3118	2	0	2	0	1	0	B1N3E1;B1N419	72	>tr|B1N3E1|B1N3E1_ENTHI Galactose binding lectin 35 kDa subunit, putative OS=Entamoeba histolytica OX=5759 GN=EHI_027800 PE=4 SV=1;>tr|B1N419|B1N419_ENTHI Galactose-inhibitable lectin 35 kDa subunit, putative OS=Entamoeba histolytica OX=5759 GN=EHI_183400
C4LU03;C4M7N4	Serine carboxypeptidase (S28) family protein	EHI_068090;EHI_037190	0.0111977	0.0602737	5.96976	31.0017	24.2317	30.9746	24.5463	30.0349	25.3239	2150000128	19700000	2110000000	24500000	1100000000	42000000					13	36.2	36.2	36.2	54.072	0	182.01	10	2	12	4	10	3	C4LU03;C4M7N4	373	>tr|C4LU03|C4LU03_ENTHI Serine carboxypeptidase (S28) family protein OS=Entamoeba histolytica OX=5759 GN=EHI_068090 PE=3 SV=1;>tr|C4M7N4|C4M7N4_ENTHI Serine carboxypeptidase (S28) family protein OS=Entamoeba histolytica OX=5759 GN=EHI_037190 PE=3 SV=1
CON__A2I7N0			0.00816489	0.0559259	4.64084	29.5664	24.0935	29.141	24.7945	27.7895	23.6865	795000000	17900000	592000000	29100000	232000000	13500000		+			5	13.9	13.9	7.3	46.311	0	12.408	5	2	5	2	5	2	CON__A2I7N0	2044	>A2I7N0 TREMBL:A2I7N0;Q28922;Q3ZEJ6 (Bos taurus) SERPINA3-4
C4M8T3	Ser/thr protein phosphatase family protein	EHI_147020	0.0822643	0.145299	5.96791	28.0349	19	24.8336	22.1174	25.1527	19	275000000	0	29900000	4550000	37300000	0					3	8.3	8.3	8.3	46.85	0	4.6592	2	0	2	1	3	0	C4M8T3	1826	>tr|C4M8T3|C4M8T3_ENTHI Ser/thr protein phosphatase family protein OS=Entamoeba histolytica OX=5759 GN=EHI_147020 PE=3 SV=1
C4LZ80	Myotubularin, putative	EHI_104710	4.06181e-05	0.0257414	5.94701	24.9584	19	25.0062	19	24.8764	19	32600000	0	33700000	0	30800000	0			+	Plus DTT_Minus DTT	2	2	2	2	100.84	0.0089805	1.3425	2	0	1	0	2	0	C4LZ80	938	>tr|C4LZ80|C4LZ80_ENTHI Myotubularin, putative OS=Entamoeba histolytica OX=5759 GN=EHI_104710 PE=4 SV=1
C4MBE1;B1N3C9	Heat shock protein 70, putative	EHI_150770;EHI_133950	0.00775898	0.0559259	5.94499	25.3239	19	25.6068	19	23.9043	19	42000000	0	51100000	0	15700000	0					2	3.2	3.2	3.2	59.767	0.0050083	1.6613	1	0	1	0	1	0	C4MBE1;B1N3C9	2021	>tr|C4MBE1|C4MBE1_ENTHI Heat shock protein 70, putative OS=Entamoeba histolytica OX=5759 GN=EHI_150770 PE=3 SV=1;>tr|B1N3C9|B1N3C9_ENTHI Heat shock protein 70, putative OS=Entamoeba histolytica OX=5759 GN=EHI_133950 PE=3 SV=1
C4LU47	Metallo-beta-lactamase family protein	EHI_068560	0.0143462	0.0629481	5.93011	28.8916	21.5404	27.2077	22.1673	26.6865	21.2877	498000000	3050000	155000000	4710000	108000000	2560000					3	21.2	21.2	21.2	23.415	0	10.843	3	1	2	1	2	1	C4LU47	389	>tr|C4LU47|C4LU47_ENTHI Metallo-beta-lactamase family protein OS=Entamoeba histolytica OX=5759 GN=EHI_068560 PE=4 SV=1
C4MA45	Uncharacterized protein	EHI_067090	0.0434079	0.0963708	5.92276	26.8741	19	25.3712	19	25.2243	21.7013	123000000	0	43400000	0	39200000	3410000					2	9	9	9	24.082	0.0059235	1.4409	2	0	2	0	2	1	C4MA45	1945	>tr|C4MA45|C4MA45_ENTHI Uncharacterized protein OS=Entamoeba histolytica OX=5759 GN=EHI_067090 PE=4 SV=1
C4LWP9	Uncharacterized protein	EHI_069620	0.0065989	0.0548842	5.92164	27.3992	21.1642	27.0711	22.0983	26.4551	19.898	177000000	2350000	141000000	4490000	92000000	977000					3	4.4	4.4	4.4	74.157	0	20.654	3	1	3	1	2	1	C4LWP9	677	>tr|C4LWP9|C4LWP9_ENTHI Uncharacterized protein OS=Entamoeba histolytica OX=5759 GN=EHI_069620 PE=3 SV=1
C4LZ63	Uncharacterized protein	EHI_104530	0.00626028	0.0542964	5.92108	25.8069	19	24.7543	19	24.2021	19	58700000	0	28300000	0	19300000	0					2	6.4	6.4	6.4	36.842	0	5.1495	2	0	2	0	2	0	C4LZ63	933	>tr|C4LZ63|C4LZ63_ENTHI Uncharacterized protein OS=Entamoeba histolytica OX=5759 GN=EHI_104530 PE=3 SV=1
C4LUW8;B1N2M8	Uncharacterized protein	EHI_179060;EHI_179070	0.0505321	0.105762	5.92093	26.604	19	25.9825	19	25.7024	22.5261	102000000	0	66300000	0	54600000	6040000					2	5.3	5.3	5.3	79.397	0.0012055	2.2056	2	0	2	0	2	1	C4LUW8;B1N2M8	474	>tr|C4LUW8|C4LUW8_ENTHI Uncharacterized protein OS=Entamoeba histolytica OX=5759 GN=EHI_179060 PE=3 SV=1;>tr|B1N2M8|B1N2M8_ENTHI Uncharacterized protein OS=Entamoeba histolytica OX=5759 GN=EHI_179070 PE=3 SV=1
P32022;B1N3C7	Galactose-inhibitable lectin 170 kDa subunit;Galactose-inhibitable lectin 170 kDa subunit, putative	EHI_133900	0.0429372	0.0958029	5.91749	34.1529	25.7077	32.5366	27.7195	32.5867	28.0965	19100000256	54800000	6230000128	221000000	6449999872	287000000					28	78.1	22.6	18.2	143.58	0	323.31	28	6	22	12	23	13	P32022;B1N3C7	2145	>sp|P32022|GIL1_ENTHI Galactose-inhibitable lectin 170 kDa subunit OS=Entamoeba histolytica OX=5759 PE=1 SV=2;>tr|B1N3C7|B1N3C7_ENTHI Galactose-inhibitable lectin 170 kDa subunit, putative OS=Entamoeba histolytica OX=5759 GN=EHI_133900 PE=4 SV=1
C4M2K2	Utp12 domain-containing protein	EHI_054840	0.0263964	0.0766382	5.91725	27.8264	22.2243	26.7517	19	25.5374	21.1395	238000000	4900000	113000000	0	48700000	2310000					6	12.5	12.5	12.5	63.92	0	41.195	5	1	5	0	3	1	C4M2K2	1256	>tr|C4M2K2|C4M2K2_ENTHI Utp12 domain-containing protein OS=Entamoeba histolytica OX=5759 GN=EHI_054840 PE=4 SV=1
B1N5A4	Uncharacterized protein	EHI_019870	0.0121367	0.0620459	5.91539	26.0254	19	24.9716	19	23.7492	19	68300000	0	32900000	0	14100000	0	+				1	3	3	3	39.781	1	-2	1	0	1	0	1	0	B1N5A4	163	>tr|B1N5A4|B1N5A4_ENTHI Uncharacterized protein OS=Entamoeba histolytica OX=5759 GN=EHI_019870 PE=4 SV=1
C4M3S7	Uncharacterized protein	EHI_052890	0.0152899	0.0644658	5.91464	26.2058	19	24.895	19	23.6431	19	77400000	0	31200000	0	13100000	0	+				1	1.5	1.5	1.5	75.47	1	-2	1	0	1	0	1	0	C4M3S7	1380	>tr|C4M3S7|C4M3S7_ENTHI Uncharacterized protein OS=Entamoeba histolytica OX=5759 GN=EHI_052890 PE=4 SV=1
C4M8X7	Niemann-Pick C1 protein, putative	EHI_080220	0.000664243	0.0487947	5.91379	25.1946	19	24.6703	19	24.8764	19	38400000	0	26700000	0	30800000	0			+	Plus DTT_Minus DTT	1	0.7	0.7	0.7	152.57	0.0059621	1.4739	1	0	1	0	1	0	C4M8X7	1842	>tr|C4M8X7|C4M8X7_ENTHI Niemann-Pick C1 protein, putative OS=Entamoeba histolytica OX=5759 GN=EHI_080220 PE=3 SV=1
C4MA40	Uncharacterized protein	EHI_180770	0.0163627	0.0658347	5.91109	29.94	22.5475	29.2647	23.7594	28.4785	23.6431	1030000000	6130000	645000000	14200000	374000000	13100000					8	23.7	23.7	23.7	33.574	0	74.435	8	1	7	2	6	2	C4MA40	1943	>tr|C4MA40|C4MA40_ENTHI Uncharacterized protein OS=Entamoeba histolytica OX=5759 GN=EHI_180770 PE=4 SV=1
Q56AY2	Poly(A)-specific ribonuclease	Caf1	0.00833141	0.0559259	5.90919	25.7945	19	25.0105	19	23.9225	19	58200000	0	33800000	0	15900000	0					1	3.2	3.2	3.2	35.674	0	3.754	1	0	1	0	1	0	Q56AY2	2194	>tr|Q56AY2|Q56AY2_ENTHI Poly(A)-specific ribonuclease OS=Entamoeba histolytica OX=5759 GN=Caf1 PE=3 SV=1
C4MBB2	Protein kinase, putative	EHI_002790	0.00425172	0.0515364	5.90859	25.6811	19	24.4984	19	24.5463	19	53800000	0	23700000	0	24500000	0					2	7.6	4.4	4.4	54.94	0	6.2784	1	0	2	0	2	0	C4MBB2	2017	>tr|C4MBB2|C4MBB2_ENTHI Protein kinase, putative OS=Entamoeba histolytica OX=5759 GN=EHI_002790 PE=3 SV=1
C4LZB9;C4M236	Uncharacterized protein	EHI_000700;EHI_169070	0.0272139	0.0783747	5.89491	26.7517	19	26.7645	21.1886	25.9847	21.6276	113000000	0	114000000	2390000	66400000	3240000					4	6.4	6.4	6.4	68.934	0	4.9847	3	0	4	1	4	1	C4LZB9;C4M236	948	>tr|C4LZB9|C4LZB9_ENTHI Uncharacterized protein OS=Entamoeba histolytica OX=5759 GN=EHI_000700 PE=3 SV=1;>tr|C4M236|C4M236_ENTHI Uncharacterized protein OS=Entamoeba histolytica OX=5759 GN=EHI_169070 PE=3 SV=1
C4MA22	Uncharacterized protein	EHI_039600	0.000696688	0.0487947	5.89455	25.2058	19	24.7338	19	24.7441	19	38700000	0	27900000	0	28100000	0			+	Plus DTT_Minus DTT	3	3.8	3.8	3.8	69.734	0.0012788	2.698	2	0	2	0	2	0	C4MA22	1939	>tr|C4MA22|C4MA22_ENTHI Uncharacterized protein OS=Entamoeba histolytica OX=5759 GN=EHI_039600 PE=4 SV=1
C4M3M8	Ras GTPase-activating protein, putative	EHI_140560	0.015444	0.0644658	5.89054	26.2732	19	23.7389	19	24.6595	19	81100000	0	14000000	0	26500000	0					3	7.3	7.3	7.3	47.29	0	4.2662	2	0	1	0	3	0	C4M3M8	1362	>tr|C4M3M8|C4M3M8_ENTHI Ras GTPase-activating protein, putative OS=Entamoeba histolytica OX=5759 GN=EHI_140560 PE=4 SV=1
C4LU42	Uncharacterized protein	EHI_068510	0.00283955	0.0487947	5.89003	34.3956	28.2803	34.6522	28.3662	34.1975	28.9287	22599999488	326000000	27000000512	346000000	19700000768	511000000			+	Plus DTT_Minus DTT	50	62.2	62.2	62.2	82.506	0	323.31	45	20	46	22	46	30	C4LU42	387	>tr|C4LU42|C4LU42_ENTHI Uncharacterized protein OS=Entamoeba histolytica OX=5759 GN=EHI_068510 PE=4 SV=1
C4M831	Protein kinase domain containing protein	EHI_108670	0.00739055	0.0559259	5.88836	25.895	19	24.5165	19	24.2535	19	62400000	0	24000000	0	20000000	0					3	7.4	7.4	7.4	46.541	0.001218	2.2826	2	0	2	0	1	0	C4M831;C4M6K6	1763	>tr|C4M831|C4M831_ENTHI Protein kinase domain containing protein OS=Entamoeba histolytica OX=5759 GN=EHI_108670 PE=3 SV=1
C4LU28	Protein kinase, putative	EHI_068350	0.0178792	0.0664714	5.87772	25.6649	19	26.0275	21.743	25.6838	19	53200000	0	68400000	3510000	53900000	0					3	4.6	4.6	4.6	89.478	0	5.9972	2	0	3	1	3	0	C4LU28;C4MAN9	382	>tr|C4LU28|C4LU28_ENTHI Protein kinase, putative OS=Entamoeba histolytica OX=5759 GN=EHI_068350 PE=4 SV=1
C4M350	Uncharacterized protein	EHI_085950	0.0472074	0.101487	5.87283	27.3153	19	26.632	22.8633	24.5345	19	167000000	0	104000000	7630000	24300000	0					4	8.3	8.3	8.3	68.533	0	17.868	3	0	4	1	2	0	C4M350;C4LU02	1316	>tr|C4M350|C4M350_ENTHI Uncharacterized protein OS=Entamoeba histolytica OX=5759 GN=EHI_085950 PE=4 SV=1
C4LXY4	SUMO-activating enzyme subunit	EHI_035540	0.00250679	0.0487947	5.86375	24.5638	19	24.5754	19	25.452	19	24800000	0	25000000	0	45900000	0			+	Plus DTT_Minus DTT	2	3.2	3.2	3.2	56.84	0.0094538	1.3118	1	0	1	0	2	0	C4LXY4	806	>tr|C4LXY4|C4LXY4_ENTHI SUMO-activating enzyme subunit OS=Entamoeba histolytica OX=5759 GN=EHI_035540 PE=3 SV=1
C4LWV1	2-(3-amino-3-carboxypropyl)histidine synthase subunit 1	EHI_199050	0.0175366	0.0664316	5.85985	31.1422	23.7492	30.1239	25.3342	29.8519	24.4551	2369999872	14100000	1170000000	42300000	969000000	23000000					14	49.4	49.4	49.4	39.118	0	102.45	11	3	13	3	12	2	C4LWV1	692	>tr|C4LWV1|C4LWV1_ENTHI 2-(3-amino-3-carboxypropyl)histidine synthase subunit 1 OS=Entamoeba histolytica OX=5759 GN=EHI_199050 PE=3 SV=1
CON__Q1RMK2			0.0088676	0.0559259	4.45666	32.8157	27.5165	32.375	28.3951	32.1361	28.0453	7560000000	192000000	5569999872	353000000	4720000000	277000000		+			17	40.9	40.9	40.9	65.056	0	278.72	16	11	16	11	17	9	CON__Q1RMK2;CON__ENSEMBL:ENSBTAP00000011227;CON__ENSEMBL:ENSBTAP00000033053	2103	>Q1RMK2 TREMBL:Q1RMK2 (Bos taurus) IGHM protein
C4LU38	COP9 signalosome subunit, putative	EHI_068470	0.0112946	0.0603731	5.85967	25.8694	19	25.002	19	23.7077	19	61300000	0	33600000	0	13700000	0					3	11	11	11	34.851	0	4.8267	3	0	2	0	1	0	C4LU38	385	>tr|C4LU38|C4LU38_ENTHI COP9 signalosome subunit, putative OS=Entamoeba histolytica OX=5759 GN=EHI_068470 PE=4 SV=1
C4LYI8	Uncharacterized protein	EHI_093970	0.014207	0.0628563	5.85346	31.5109	24.3578	31.2422	25.5638	30.4234	25.6944	3060000000	21500000	2540000000	49600000	1440000000	54300000					15	30.9	30.9	30.9	68.804	0	222.39	13	2	14	3	12	3	C4LYI8	867	>tr|C4LYI8|C4LYI8_ENTHI Uncharacterized protein OS=Entamoeba histolytica OX=5759 GN=EHI_093970 PE=4 SV=1
C4M6M0	Uncharacterized protein	EHI_147440	0.00604167	0.0540667	5.85019	25.1681	19	25.433	19	23.9495	19	37700000	0	45300000	0	16200000	0					3	1.5	1.5	1.5	280.19	0	2.9871	2	0	3	0	2	0	C4M6M0	1637	>tr|C4M6M0|C4M6M0_ENTHI Uncharacterized protein OS=Entamoeba histolytica OX=5759 GN=EHI_147440 PE=3 SV=1
CON__ENSEMBL:ENSBTAP00000024466			0.00891169	0.0559259	6.12452	31.0737	24.1488	30.6881	24.2317	30.393	25.4008	2260000000	18600000	1730000000	19700000	1410000000	44300000		+			3	57.1	21.2	21.2	43.9	0	169.33	3	1	3	1	3	1	CON__ENSEMBL:ENSBTAP00000024466	2051	>ENSEMBL:ENSBTAP00000024466 (Bos taurus) 44 kDa protein
C4M8M7	Phospholipase B-like	EHI_114320	0.0130126	0.0620854	5.85008	30.2535	23.1856	29.8901	24.1488	29.158	24.417	1280000000	9540000	995000000	18600000	599000000	22400000					12	25.3	25.3	25.3	63.371	0	56.659	11	2	11	2	11	3	C4M8M7	1813	>tr|C4M8M7|C4M8M7_ENTHI Phospholipase B-like OS=Entamoeba histolytica OX=5759 GN=EHI_114320 PE=3 SV=1
B1N2D7	Uncharacterized protein	EHI_153550	0.0286024	0.0794323	5.83868	26.8142	19	24.2096	19	23.4923	19	118000000	0	19400000	0	11800000	0	+				1	4.1	4.1	4.1	42.88	1	-2	1	0	1	0	1	0	B1N2D7	4	>tr|B1N2D7|B1N2D7_ENTHI Uncharacterized protein OS=Entamoeba histolytica OX=5759 GN=EHI_153550 PE=4 SV=1
C4MBS4;B1N5I7;B1N561;C4MBA3;B1N509;B1N5F1;C4MBD3	Uncharacterized protein	EHI_128900;EHI_198110	0.0021118	0.0487947	5.83705	30.3515	24.141	29.3088	23.3239	28.7958	23.48	1370000000	18500000	665000000	10500000	466000000	11700000			+	Plus DTT_Minus DTT	2	3	3	1.9	69.709	0.0039886	1.8128	2	1	2	1	2	2	C4MBS4;B1N5I7;B1N561;C4MBA3;B1N509;B1N5F1;C4MBD3	2039	>tr|C4MBS4|C4MBS4_ENTHI Uncharacterized protein OS=Entamoeba histolytica OX=5759 GN=EHI_128900 PE=4 SV=1;>tr|B1N5I7|B1N5I7_ENTHI Uncharacterized protein OS=Entamoeba histolytica OX=5759 GN=EHI_198110 PE=4 SV=1;>tr|B1N561|B1N561_ENTHI Uncharacterized protei
C4M0B9	Protein tyrosine kinase domain-containing protein	EHI_064500	0.0224482	0.0720329	5.82785	32.8534	25.2571	31.9153	26.8264	31.5754	26.7771	7760000000	40100000	4049999872	119000000	3200000000	115000000					35	31	31	21.4	133.17	0	207.23	34	10	29	12	31	11	C4M0B9	1044	>tr|C4M0B9|C4M0B9_ENTHI Protein tyrosine kinase domain-containing protein OS=Entamoeba histolytica OX=5759 GN=EHI_064500 PE=4 SV=1
C4MBD7	La ribonucleoprotein, putative	EHI_053830	0.081086	0.143991	5.82711	26.3153	19	26.8623	19	25.3712	23.0674	83500000	0	122000000	0	43400000	8790000					4	13	13	13	40.081	0	19.189	2	0	4	0	2	2	C4MBD7	2019	>tr|C4MBD7|C4MBD7_ENTHI La ribonucleoprotein, putative OS=Entamoeba histolytica OX=5759 GN=EHI_053830 PE=4 SV=1
C4LTT0	Cysteine proteinase, putative	EHI_050570	0.000382858	0.0487947	5.82291	29.9677	23.9316	29.2285	23.4425	28.9705	23.3239	1050000000	16000000	629000000	11400000	526000000	10500000			+	Plus DTT_Minus DTT	9	38.3	35.4	35.4	33.686	0	71.729	9	4	8	3	6	3	C4LTT0	349	>tr|C4LTT0|C4LTT0_ENTHI Cysteine proteinase, putative OS=Entamoeba histolytica OX=5759 GN=EHI_050570 PE=2 SV=1
C4M5F1	Protein HIRA	EHI_131950	0.00161433	0.0487947	5.82276	24.9406	19	25.1565	19	24.3712	19	32200000	0	37400000	0	21700000	0	+		+	Plus DTT_Minus DTT	1	1.2	1.2	1.2	95.32	1	-2	1	0	1	0	1	0	C4M5F1	1536	>tr|C4M5F1|C4M5F1_ENTHI Protein HIRA OS=Entamoeba histolytica OX=5759 GN=EHI_131950 PE=3 SV=1
Q6AW67	EhRab7B protein	EhRAB7B	1.08914e-05	0.0121385	5.82209	24.848	19	24.7846	19	24.8336	19	30200000	0	28900000	0	29900000	0			+	Plus DTT_Minus DTT	1	4.8	4.8	4.8	23.141	0	3.2436	1	0	1	0	1	1	Q6AW67	2274	>tr|Q6AW67|Q6AW67_ENTHI EhRab7B protein OS=Entamoeba histolytica OX=5759 GN=EhRAB7B PE=3 SV=1
C4LS94	Uncharacterized protein	EHI_153010	0.00772356	0.0559259	5.81864	25.6944	19	24.848	19	23.9134	19	54300000	0	30200000	0	15800000	0	+				1	3.7	3.7	3.7	31.189	1	-2	1	0	1	0	1	0	C4LS94	182	>tr|C4LS94|C4LS94_ENTHI Uncharacterized protein OS=Entamoeba histolytica OX=5759 GN=EHI_153010 PE=4 SV=1
C4M561	Uncharacterized protein	EHI_178080	0.00581785	0.05403	5.81147	25.5374	19	24.895	19	24.002	19	48700000	0	31200000	0	16800000	0					2	5.9	5.9	5.9	44.639	0	3.4798	2	0	2	0	1	0	C4M561	1513	>tr|C4M561|C4M561_ENTHI Uncharacterized protein OS=Entamoeba histolytica OX=5759 GN=EHI_178080 PE=2 SV=1
C4M8H3	Formin homology 2 domain containing protein	EHI_090250	0.0630485	0.121256	5.80755	26.3562	19	26.3222	19	24.6431	21.8987	85900000	0	83900000	0	26200000	3910000					4	5	5	5	99.102	0	5.7558	3	0	4	0	2	1	C4M8H3	1801	>tr|C4M8H3|C4M8H3_ENTHI Formin homology 2 domain containing protein OS=Entamoeba histolytica OX=5759 GN=EHI_090250 PE=3 SV=1
C4MB80	Uncharacterized protein	EHI_028540	0.0142465	0.0628563	5.8067	26.0359	19	24.7745	19	23.6096	19	68800000	0	28700000	0	12800000	0	+				1	1.8	1.8	1.8	44.87	1	-2	1	0	1	0	1	0	C4MB80	2008	>tr|C4MB80|C4MB80_ENTHI Uncharacterized protein OS=Entamoeba histolytica OX=5759 GN=EHI_028540 PE=4 SV=1
C4LZV8	ATP-dependent (S)-NAD(P)H-hydrate dehydratase	EHI_194450	0.00978016	0.0584923	5.79966	25.8433	19	24.7077	19	23.848	19	60200000	0	27400000	0	15100000	0					2	12	12	12	32.622	0.0012587	2.5584	2	0	1	0	1	0	C4LZV8	993	>sp|C4LZV8|NNRD_ENTHI ATP-dependent (S)-NAD(P)H-hydrate dehydratase OS=Entamoeba histolytica OX=5759 GN=EHI_194450 PE=3 SV=1
C4LYA9	Acetyltransferase, GNAT family	EHI_167080	0.0118509	0.0618434	5.7901	24.4676	19	23.8858	19	26.0169	19	23200000	0	15500000	0	67900000	0					2	14.8	14.8	14.8	17.442	0	5.4937	1	0	1	0	2	0	C4LYA9	840	>tr|C4LYA9|C4LYA9_ENTHI Acetyltransferase, GNAT family OS=Entamoeba histolytica OX=5759 GN=EHI_167080 PE=4 SV=1
B1N443	Uncharacterized protein	EHI_200010	0.0204119	0.0701213	5.78433	26.4629	19	23.9495	19	23.9406	19	92500000	0	16200000	0	16100000	0					2	7.4	7.4	7.4	37.623	0	7.1077	2	0	1	0	1	0	B1N443	112	>tr|B1N443|B1N443_ENTHI Uncharacterized protein OS=Entamoeba histolytica OX=5759 GN=EHI_200010 PE=4 SV=1
C4M6T2	RNA-splicing ligase RtcB homolog 2	EHI_184560	0.0966514	0.163333	5.7791	29.995	21.4576	29.0057	22.2419	25.6458	23.6096	1070000000	2880000	539000000	4960000	52500000	12800000					2	5.4	5.4	5.4	59.145	0	3.8431	2	1	1	1	1	1	C4M6T2	1653	>sp|C4M6T2|RTCB2_ENTHI RNA-splicing ligase RtcB homolog 2 OS=Entamoeba histolytica OX=5759 GN=EHI_184560 PE=3 SV=1
C4M4I1	Tyrosine kinase, putative	EHI_138750	0.0264539	0.0766786	5.77494	32.8215	25.1565	31.6964	26.5898	31.3303	26.7771	7590000128	37400000	3480000000	101000000	2700000000	115000000					47	43.3	43.3	41.9	124.18	0	166.41	39	8	37	14	39	16	C4M4I1	1458	>tr|C4M4I1|C4M4I1_ENTHI Tyrosine kinase, putative OS=Entamoeba histolytica OX=5759 GN=EHI_138750 PE=4 SV=1
C4LVR6	Tyrosine kinase, putative	EHI_186990	0.0286288	0.0794323	5.7726	31.3568	23.6209	30.5573	25.452	30.1604	25.6838	2750000128	12900000	1580000000	45900000	1200000000	53900000					28	30.9	30.9	30.9	101.2	0	115.61	25	4	22	7	24	7	C4LVR6	572	>tr|C4LVR6|C4LVR6_ENTHI Tyrosine kinase, putative OS=Entamoeba histolytica OX=5759 GN=EHI_186990 PE=4 SV=1
C4MBA4	Uncharacterized protein	EHI_167940	0.0675235	0.12712	5.76818	27.9088	19	28.0762	23.5754	25.8336	21.9388	252000000	0	283000000	12500000	59800000	4020000					9	10.4	10.4	10.4	103.73	0	14.694	4	0	8	3	3	2	C4MBA4	2015	>tr|C4MBA4|C4MBA4_ENTHI Uncharacterized protein OS=Entamoeba histolytica OX=5759 GN=EHI_167940 PE=4 SV=1
C4LW27	Uncharacterized protein	EHI_141800	0.0727316	0.133321	5.76259	26.7645	19	26.0233	19	25.0732	22.5731	114000000	0	68200000	0	35300000	6240000					2	24.3	24.3	24.3	8.1082	0	6.9613	2	0	2	0	1	1	C4LW27	611	>tr|C4LW27|C4LW27_ENTHI Uncharacterized protein OS=Entamoeba histolytica OX=5759 GN=EHI_141800 PE=4 SV=1
C4M185	Protein kinase, putative	EHI_188110	0.00577039	0.05403	5.75882	30.8309	24.3307	30.1361	25.1565	29.5862	23.7895	1910000000	21100000	1180000000	37400000	806000000	14500000					28	31.7	31.7	31.7	107.71	0	81.313	25	4	20	5	20	2	C4M185	1128	>tr|C4M185|C4M185_ENTHI Protein kinase, putative OS=Entamoeba histolytica OX=5759 GN=EHI_188110 PE=4 SV=1
C4M6H5	NPL domain-containing protein	EHI_099720	0.000984077	0.0487947	5.75825	30.8234	24.7338	30.6544	25.1871	30.2759	24.558	1900000000	27900000	1690000000	38200000	1300000000	24700000			+	Plus DTT_Minus DTT	5	38.9	38.9	38.9	13.926	0	14.21	5	3	5	3	5	2	C4M6H5	1625	>tr|C4M6H5|C4M6H5_ENTHI NPL domain-containing protein OS=Entamoeba histolytica OX=5759 GN=EHI_099720 PE=2 SV=1
C4LZ47	Nucleoside diphosphate kinase, putative	EHI_104360	0.0207417	0.0702577	5.74239	31.4581	24.0443	30.6544	25.5983	30.1483	25.391	2950000128	17300000	1690000000	50800000	1190000000	44000000					14	55.9	55.9	55.9	23.7	0	54.199	14	3	12	4	11	4	C4LZ47	926	>tr|C4LZ47|C4LZ47_ENTHI Nucleoside diphosphate kinase, putative OS=Entamoeba histolytica OX=5759 GN=EHI_104360 PE=4 SV=1
B1N3X5	Uncharacterized protein	EHI_081750	0.0510284	0.106141	5.74109	27.1795	19	25.8974	20.3752	26.4441	22.9225	152000000	0	62500000	1360000	91300000	7950000	+				2	4.3	4.3	4.3	40.851	1	-2	2	0	1	1	2	1	B1N3X5	101	>tr|B1N3X5|B1N3X5_ENTHI Uncharacterized protein OS=Entamoeba histolytica OX=5759 GN=EHI_081750 PE=4 SV=1
C4LTA4	Peptidylprolyl isomerase	EHI_044850	0.000711132	0.0487947	5.73645	24.4676	19	24.7441	19	24.9977	19	23200000	0	28100000	0	33500000	0			+	Plus DTT_Minus DTT	2	5.6	5.6	5.6	35.496	0.001199	2.1768	1	0	1	0	2	0	C4LTA4	300	>tr|C4LTA4|C4LTA4_ENTHI Peptidylprolyl isomerase OS=Entamoeba histolytica OX=5759 GN=EHI_044850 PE=4 SV=1
B1N493	Ras-GAP domain-containing protein	EHI_185440	0.016065	0.0652256	5.73377	29.4688	23.0139	28.965	24.7024	28.8564	22.3725	743000000	8470000	524000000	27300000	486000000	5430000					6	35.8	35.8	35.8	19.118	0	24.848	6	2	4	2	4	1	B1N493	118	>tr|B1N493|B1N493_ENTHI Ras-GAP domain-containing protein OS=Entamoeba histolytica OX=5759 GN=EHI_185440 PE=4 SV=1
C4M2H0	LisH domain-containing protein	EHI_040410	0.00874316	0.0559259	5.72598	25.1371	20.4676	25.4394	19	25.0691	19	36900000	1450000	45500000	0	35200000	0					3	2.1	2.1	2.1	150.56	0.004023	1.8937	1	1	3	0	2	0	C4M2H0	1246	>tr|C4M2H0|C4M2H0_ENTHI LisH domain-containing protein OS=Entamoeba histolytica OX=5759 GN=EHI_040410 PE=3 SV=1
Q1EQ40	EhEmp24D (Fragment)	EHI_038590	0.0142642	0.0628563	5.71794	31.6839	24.7234	31.196	25.5783	30.6198	26.0443	3449999872	27700000	2460000000	50100000	1650000000	69200000					11	47.2	47.2	47.2	22.326	0	89.097	11	3	11	4	10	4	Q1EQ40	2169	>tr|Q1EQ40|Q1EQ40_ENTHI EhEmp24D (Fragment) OS=Entamoeba histolytica OX=5759 GN=EHI_038590 PE=3 SV=1
C4M0F6	Uncharacterized protein	EHI_006830	0.0511358	0.106141	5.71667	24.7492	19	27.0296	19	25.6757	22.3045	28200000	0	137000000	0	53600000	5180000					3	7.7	7.7	7.7	42.139	0	6.1331	1	0	3	0	2	1	C4M0F6	1056	>tr|C4M0F6|C4M0F6_ENTHI Uncharacterized protein OS=Entamoeba histolytica OX=5759 GN=EHI_006830 PE=2 SV=1
C4LS86	Uncharacterized protein	EHI_152930	0.00165779	0.0487947	5.71507	24.8528	19	25.0317	19	24.2607	19	30300000	0	34300000	0	20100000	0			+	Plus DTT_Minus DTT	1	2.9	2.9	2.9	39.806	0.0040253	1.8972	1	0	1	0	1	0	C4LS86	180	>tr|C4LS86|C4LS86_ENTHI Uncharacterized protein OS=Entamoeba histolytica OX=5759 GN=EHI_152930 PE=4 SV=1
C4M2A9	Lecithin:cholesterol acyltransferase domain-containing protein	EHI_136400	0.0186767	0.0674722	5.7095	28.8385	22.6497	28.6527	21.8764	27.9923	23.8288	480000000	6580000	422000000	3850000	267000000	14900000					7	18.8	18.8	18.8	45.459	0	19.353	5	2	7	1	7	3	C4M2A9	1231	>tr|C4M2A9|C4M2A9_ENTHI Lecithin:cholesterol acyltransferase domain-containing protein OS=Entamoeba histolytica OX=5759 GN=EHI_136400 PE=4 SV=1
C4LZA9	Exosome complex exonuclease, putative	EHI_000580	0.0362546	0.0874584	5.7072	26.6998	19	25.2207	21.3857	24.5869	19	109000000	0	39100000	2740000	25200000	0					3	13.2	13.2	13.2	29.302	0	5.6051	3	0	2	1	2	0	C4LZA9	945	>tr|C4LZA9|C4LZA9_ENTHI Exosome complex exonuclease, putative OS=Entamoeba histolytica OX=5759 GN=EHI_000580 PE=4 SV=1
C4LVP7	Uncharacterized protein	EHI_186800	0.210439	0.285322	5.69937	29.5736	19	25.7492	25.895	25.6703	19	799000000	0	56400000	62400000	53400000	0					5	6.8	6.8	6.8	108.98	0	11.282	4	0	3	1	4	0	C4LVP7	566	>tr|C4LVP7|C4LVP7_ENTHI Uncharacterized protein OS=Entamoeba histolytica OX=5759 GN=EHI_186800 PE=4 SV=1
C4M342	Cysteine protease binding protein family 8	cpbf8	0.00393577	0.0504186	5.69844	35.0184	28.6146	34.7751	29.3174	34.3303	29.0965	34800001024	411000000	29400000512	669000000	21600000000	574000000					50	55.3	55.3	55.3	99.295	0	323.31	48	24	50	28	48	26	C4M342	1312	>tr|C4M342|C4M342_ENTHI Cysteine protease binding protein family 8 OS=Entamoeba histolytica OX=5759 GN=cpbf8 PE=2 SV=1
C4LYM6	WD domain containing protein	EHI_118780	0.0209721	0.0702577	5.69503	25.8191	19	25.2096	19	25.2207	21.1642	59200000	0	38800000	0	39100000	2350000					2	5.3	5.3	5.3	37.537	0.0023406	2.0419	2	0	2	0	2	1	C4LYM6	877	>tr|C4LYM6|C4LYM6_ENTHI WD domain containing protein OS=Entamoeba histolytica OX=5759 GN=EHI_118780 PE=4 SV=1
C4M7Z8	Uncharacterized protein	EHI_167660	0.00472311	0.0515735	5.69349	25.2926	19	25.2643	20.3101	24.8336	19	41100000	0	40300000	1300000	29900000	0					3	4.6	4.6	4.6	74.219	0.0011933	2.1519	3	0	2	1	2	0	C4M7Z8	1757	>tr|C4M7Z8|C4M7Z8_ENTHI Uncharacterized protein OS=Entamoeba histolytica OX=5759 GN=EHI_167660 PE=4 SV=1
C4LYV2	60S ribosomal protein L7, putative	EHI_010650	0.0124642	0.0620854	5.68896	34.0101	27.0914	32.7129	27.3239	32.555	27.7958	17300000768	143000000	7040000000	168000000	6310000128	233000000					21	67.8	67.8	20.4	25.73	0	109.2	21	7	19	7	17	9	C4LYV2	902	>tr|C4LYV2|C4LYV2_ENTHI 60S ribosomal protein L7, putative OS=Entamoeba histolytica OX=5759 GN=EHI_010650 PE=2 SV=1
C4M0V0	Rap/Ran GTPase-activating protein, putative	EHI_100290	0.020407	0.0701213	5.68674	29.0864	21.8385	28.6181	23.2492	28.2625	23.8191	570000000	3750000	412000000	9970000	322000000	14800000					13	31.3	31.3	31.3	65.518	0	57.499	11	1	12	1	10	3	C4M0V0	1094	>tr|C4M0V0|C4M0V0_ENTHI Rap/Ran GTPase-activating protein, putative OS=Entamoeba histolytica OX=5759 GN=EHI_100290 PE=4 SV=1
CON__ENSEMBL:ENSBTAP00000024146			0.0103493	0.0587806	4.98597	32.4007	26.4862	31.8682	26.976	30.7692	26.6181	5670000128	94000000	3920000000	132000000	1830000000	103000000		+			48	38.9	38.9	38.9	164.34	0	252.77	40	16	42	17	35	16	CON__ENSEMBL:ENSBTAP00000024146	2049	>ENSEMBL:ENSBTAP00000024146 (Bos taurus) similar to alpha-2-macroglobulin isoform 1
C4LTE2	Calpain family cysteine protease, putative	EHI_045290	0.0159196	0.0652139	5.68612	30.7692	23.867	29.9677	24.2021	29.4473	25.0567	1830000000	15300000	1050000000	19300000	732000000	34900000					9	21.1	21.1	21.1	53.103	0	40.358	8	4	9	3	7	5	C4LTE2	309	>tr|C4LTE2|C4LTE2_ENTHI Calpain family cysteine protease, putative OS=Entamoeba histolytica OX=5759 GN=EHI_045290 PE=4 SV=1
B1N4E7	Importin alpha-1 subunit, putative	EHI_124900	0.00285541	0.0487947	5.68607	25.0732	19	24.8997	19	24.0854	19	35300000	0	31300000	0	17800000	0			+	Plus DTT_Minus DTT	2	3.9	3.9	3.9	55.785	0	2.9151	2	0	2	0	1	0	B1N4E7	124	>tr|B1N4E7|B1N4E7_ENTHI Importin alpha-1 subunit, putative OS=Entamoeba histolytica OX=5759 GN=EHI_124900 PE=4 SV=1
C4LZF8	Proteasome subunit beta	EHI_137970	0.183538	0.265083	5.68375	19	19	27.604	19	27.4473	19	0	0	204000000	0	183000000	0					1	21.3	10.2	10.2	25.04	0	15.77	0	0	1	0	1	0	C4LZF8	955	>tr|C4LZF8|C4LZF8_ENTHI Proteasome subunit beta OS=Entamoeba histolytica OX=5759 GN=EHI_137970 PE=3 SV=1
B1N4H2;C4M844	GPN-loop GTPase 2	EHI_022300;EHI_108650	0.0079713	0.0559259	5.68268	23.7695	19	25.5345	19	24.7441	19	14300000	0	48600000	0	28100000	0					2	6.7	6.7	6.7	27.215	0.0012114	2.2631	1	0	2	0	2	0	B1N4H2;C4M844	131	>tr|B1N4H2|B1N4H2_ENTHI GPN-loop GTPase 2 OS=Entamoeba histolytica OX=5759 GN=EHI_022300 PE=3 SV=1;>tr|C4M844|C4M844_ENTHI GPN-loop GTPase 2 OS=Entamoeba histolytica OX=5759 GN=EHI_108650 PE=3 SV=1
C4MB96	AIG1 family protein, putative	EHI_195260	0.0133718	0.0621874	5.68089	25.9781	19	24.275	19	23.7895	19	66100000	0	20300000	0	14500000	0					3	15.6	7	6.7	36.355	0.0011969	2.1666	2	0	2	0	1	0	C4MB96;C4M9Z5;C4MB95;C4MAT2;C4MB60;C4M288	2012	>tr|C4MB96|C4MB96_ENTHI AIG1 family protein, putative OS=Entamoeba histolytica OX=5759 GN=EHI_195260 PE=4 SV=1
C4M3L8	Uncharacterized protein	EHI_110000	0.008896	0.0559259	5.6766	30.9188	24.1719	30.2759	25.0233	29.8445	24.8142	2030000000	18900000	1300000000	34100000	964000000	29500000					14	74.2	74.2	74.2	23.829	0	223.91	14	4	14	5	13	5	C4M3L8	1358	>tr|C4M3L8|C4M3L8_ENTHI Uncharacterized protein OS=Entamoeba histolytica OX=5759 GN=EHI_110000 PE=4 SV=1
C4M630	Uncharacterized protein	EHI_125400	0.034036	0.0852501	5.66446	26.6181	19	25.6998	21.7796	24.4551	19	103000000	0	54500000	3600000	23000000	0	+				1	4.1	4.1	4.1	36.797	1	-2	1	0	1	1	1	0	C4M630	1594	>tr|C4M630|C4M630_ENTHI Uncharacterized protein OS=Entamoeba histolytica OX=5759 GN=EHI_125400 PE=4 SV=1
C4LT65	Heat shock protein 70, putative	EHI_148990	0.00914277	0.0559869	5.66194	31.2759	24.5463	30.0737	24.7543	29.7064	24.7695	2600000000	24500000	1130000000	28300000	876000000	28600000					20	29.8	29.8	29.8	88.052	0	178.52	19	6	18	5	16	5	C4LT65;B1N3E4	291	>tr|C4LT65|C4LT65_ENTHI Heat shock protein 70, putative OS=Entamoeba histolytica OX=5759 GN=EHI_148990 PE=4 SV=1
B1N559	Galactose-specific adhesin 170kD subunit, putative	EHI_042370	0.0133424	0.0621874	5.66061	31.4871	24.5105	30.6881	25.7846	30.8534	25.7517	3009999872	23900000	1730000000	57800000	1940000000	56500000					7	69.8	7.6	7.6	142.58	0	155.24	6	4	6	3	7	3	B1N559	157	>tr|B1N559|B1N559_ENTHI Galactose-specific adhesin 170kD subunit, putative OS=Entamoeba histolytica OX=5759 GN=EHI_042370 PE=4 SV=1
C4M7N9	Receptor protein kinase, putative	EHI_037140	0.00195949	0.0487947	5.64669	31.5203	25.6181	30.5014	24.6096	30.0084	24.8623	3080000000	51500000	1520000000	25600000	1080000000	30500000			+	Plus DTT_Minus DTT	25	24	22.7	22.7	128.94	0	112.32	23	5	21	4	21	7	C4M7N9	1733	>tr|C4M7N9|C4M7N9_ENTHI Receptor protein kinase, putative OS=Entamoeba histolytica OX=5759 GN=EHI_037140 PE=4 SV=1
C4M093	Ankyrin, putative	EHI_004990	0.00370892	0.0496409	5.63009	25.0935	19	24.8385	19	23.9584	19	35800000	0	30000000	0	16300000	0			+	Plus DTT_Minus DTT	1	1.2	1.2	1.2	97.424	0.0050619	1.7087	1	0	1	0	1	0	C4M093	1037	>tr|C4M093|C4M093_ENTHI Ankyrin, putative OS=Entamoeba histolytica OX=5759 GN=EHI_004990 PE=4 SV=1
C4LV74	Uncharacterized protein	EHI_182970	0.0206008	0.0702577	5.62826	31.7047	24.4488	30.5573	25.9248	30.0737	25.0772	3500000000	22900000	1580000000	63700000	1130000000	35400000					11	28.5	28.5	28.5	41.156	0	63.635	11	2	11	4	10	3	C4LV74	506	>tr|C4LV74|C4LV74_ENTHI Uncharacterized protein OS=Entamoeba histolytica OX=5759 GN=EHI_182970 PE=2 SV=1
CON__P01045-1;CON__Q2KJ62;CON__P01044-1			0.0109524	0.0602737	5.70245	25.2021	19	25.4008	19	23.5045	19	38600000	0	44300000	0	11900000	0		+			2	4.7	4.7	4.7	68.709	0	5.5888	1	0	2	0	1	0	CON__P01045-1;CON__Q2KJ62;CON__P01044-1	2063	>P01045-1 SWISS-PROT:P01045-1 (Bos taurus) Isoform HMW of Kininogen-2 precursor;>Q2KJ62 TREMBL:Q2KJ62 (Bos taurus) KNG protein;>P01044-1 SWISS-PROT:P01044-1 (Bos taurus) Isoform HMW of Kininogen-1 precursor
C4LWG9	Lysozyme, putative	EHI_096570	0.00731849	0.0559259	5.62382	32.4581	25.867	31.8347	26.673	31.611	26.4923	5900000256	61200000	3830000128	107000000	3280000000	94400000					4	14.2	14.2	14.2	23.485	0	50.927	4	2	4	3	4	2	C4LWG9	657	>tr|C4LWG9|C4LWG9_ENTHI Lysozyme, putative OS=Entamoeba histolytica OX=5759 GN=EHI_096570 PE=2 SV=1
CON__ENSEMBL:ENSBTAP00000024462			0.0111604	0.0602737	4.62892	32.947	27.4707	32.225	27.5826	31.9188	28.1507	8280000000	186000000	5020000256	201000000	4060000000	298000000		+			17	61.6	61.6	22.9	46.543	0	176.86	14	10	16	11	15	11	CON__ENSEMBL:ENSBTAP00000024462	2050	>ENSEMBL:ENSBTAP00000024462 (Bos taurus) 47 kDa protein
C4M6L0	Gal/GalNAc lectin subunit Igl2	EHI_065330	0.0255254	0.0757605	5.62308	32.717	25.3545	31.1783	25.9271	30.9814	26.726	7059999744	42900000	2430000128	63800000	2120000000	111000000					34	60.5	40.2	40.2	120.39	0	323.31	31	8	25	8	25	12	C4M6L0	1633	>tr|C4M6L0|C4M6L0_ENTHI Gal/GalNAc lectin subunit Igl2 OS=Entamoeba histolytica OX=5759 GN=EHI_065330 PE=4 SV=1
C4LXA6	Aminoacyl-tRNA hydrolase	EHI_098230	0.0134829	0.0621874	5.62141	27.509	22.6736	27.6865	22.5892	25.9316	19	191000000	6690000	216000000	6310000	64000000	0					5	43.1	43.1	43.1	17.726	0	23.979	4	2	4	2	3	0	C4LXA6	737	>tr|C4LXA6|C4LXA6_ENTHI Aminoacyl-tRNA hydrolase OS=Entamoeba histolytica OX=5759 GN=EHI_098230 PE=4 SV=1
C4LX90	Uncharacterized protein	EHI_013240	0.0316679	0.0825297	5.62028	26.3975	19	24.6153	19	22.848	19	88400000	0	25700000	0	7550000	0					3	1.6	1.6	1.6	233.86	0.00453	1.7621	1	0	2	0	1	0	C4LX90	732	>tr|C4LX90|C4LX90_ENTHI Uncharacterized protein OS=Entamoeba histolytica OX=5759 GN=EHI_013240 PE=4 SV=1
Q964D2	Gal/GalNAc lectin Igl1	igl1	0.0310655	0.0818084	5.61551	36.8281	29.1866	35.2793	30.6198	35.2084	30.6629	121999998976	611000000	41699999744	1650000000	39700000768	1700000000					106	84.8	84.8	67.5	119.51	0	323.31	104	40	94	54	95	55	Q964D2	2297	>tr|Q964D2|Q964D2_ENTHI Gal/GalNAc lectin Igl1 OS=Entamoeba histolytica OX=5759 GN=igl1 PE=2 SV=1
C4MBC6	Uncharacterized protein	EHI_066300	0.0028775	0.0487947	5.60086	25.1946	19	24.217	19	24.391	19	38400000	0	19500000	0	22000000	0			+	Plus DTT_Minus DTT	2	4.2	4.2	4.2	64.639	0	5.5502	1	0	1	0	1	1	C4MBC6	2018	>tr|C4MBC6|C4MBC6_ENTHI Uncharacterized protein OS=Entamoeba histolytica OX=5759 GN=EHI_066300 PE=4 SV=1
C4LXW4	Uncharacterized protein	EHI_087840	0.132942	0.208241	5.59675	29.1065	19	28.4032	24.5522	27.2625	24.4298	578000000	0	355000000	24600000	161000000	22600000					14	16.3	16.3	16.3	118.02	0	73.995	11	0	10	4	8	3	C4LXW4	801	>tr|C4LXW4|C4LXW4_ENTHI Uncharacterized protein OS=Entamoeba histolytica OX=5759 GN=EHI_087840 PE=4 SV=1
C4LXJ2	Ras guanine nucleotide exchange factor, putative	EHI_131260	0.07306	0.133722	5.59663	25.7945	23.2492	31.5203	23.5522	30.2869	24.0105	58200000	9970000	3080000000	12300000	1310000000	16900000					5	4.8	4.8	4.8	141.7	0	9.6792	2	3	4	2	2	2	C4LXJ2	774	>tr|C4LXJ2|C4LXJ2_ENTHI Ras guanine nucleotide exchange factor, putative OS=Entamoeba histolytica OX=5759 GN=EHI_131260 PE=4 SV=1
C4LWF8	Uncharacterized protein	EHI_096450	0.00135513	0.0487947	5.58895	24.9803	19	24.2821	19	24.5045	19	33100000	0	20400000	0	23800000	0			+	Plus DTT_Minus DTT	1	9.5	9.5	9.5	23.564	0.0045326	1.7655	1	0	1	0	1	0	C4LWF8	652	>tr|C4LWF8|C4LWF8_ENTHI Uncharacterized protein OS=Entamoeba histolytica OX=5759 GN=EHI_096450 PE=2 SV=1
C4M5J7	Uncharacterized protein	EHI_001830	0.0175541	0.0664316	5.58779	31.6415	24.5754	30.1604	25.5345	29.6697	24.5983	3350000128	25000000	1200000000	48600000	854000000	25400000					16	40	40	40	47.296	0	209.02	16	7	15	9	14	5	C4M5J7	1546	>tr|C4M5J7|C4M5J7_ENTHI Uncharacterized protein OS=Entamoeba histolytica OX=5759 GN=EHI_001830 PE=4 SV=1
C4LUR3	Cysteine protease binding protein family 6	cpbf6	0.00825857	0.0559259	5.58681	35.5354	28.9595	35.0832	29.7692	34.5867	29.7162	49799999488	522000000	36400001024	915000000	25799999488	882000000					39	55.9	55.9	55.9	97.82	0	323.31	34	19	36	22	36	24	C4LUR3	460	>tr|C4LUR3|C4LUR3_ENTHI Cysteine protease binding protein family 6 OS=Entamoeba histolytica OX=5759 GN=cpbf6 PE=2 SV=1
C4M2I4	Serine carboxypeptidase (S28) family protein	EHI_054530	0.0210549	0.0702577	5.58134	29.8004	22.654	30.0737	24.8336	29.5333	25.1757	935000000	6600000	1130000000	29900000	777000000	37900000					12	29.4	29.4	29.4	53.075	0	52.813	10	1	10	2	11	3	C4M2I4	1251	>tr|C4M2I4|C4M2I4_ENTHI Serine carboxypeptidase (S28) family protein OS=Entamoeba histolytica OX=5759 GN=EHI_054530 PE=3 SV=1
C4LXW0	Tyrosine kinase, putative	EHI_087800	0.0276863	0.0789038	5.56976	29.94	22.8423	28.4473	22.6736	28.141	24.3031	1030000000	7520000	366000000	6690000	296000000	20700000					16	16.9	15.6	13.3	124.27	0	71.706	13	2	14	2	12	1	C4LXW0;C4M315	800	>tr|C4LXW0|C4LXW0_ENTHI Tyrosine kinase, putative OS=Entamoeba histolytica OX=5759 GN=EHI_087800 PE=4 SV=1
C4M8E2	Uncharacterized protein	EHI_115310	0.00451811	0.0515735	5.55803	25.2821	19	24.3645	19	24.0275	19	40800000	0	21600000	0	17100000	0					1	4.9	4.9	4.9	20.929	0.0045249	1.7542	1	0	1	0	1	0	C4M8E2	1792	>tr|C4M8E2|C4M8E2_ENTHI Uncharacterized protein OS=Entamoeba histolytica OX=5759 GN=EHI_115310 PE=4 SV=1
C4LV30	Uncharacterized protein	EHI_092710	0.0387915	0.0897885	5.5444	26.2909	19	26.3778	22.9352	24.8997	19	82100000	0	87200000	8020000	31300000	0	+				1	9.4	9.4	9.4	14.777	1	-2	1	0	1	1	1	0	C4LV30	493	>tr|C4LV30|C4LV30_ENTHI Uncharacterized protein OS=Entamoeba histolytica OX=5759 GN=EHI_092710 PE=4 SV=1
C4M7I1	CXXC-rich protein	EHI_111990	0.0138234	0.0625652	5.54025	31.2814	24.6264	30.0084	25.632	30.2759	24.6865	2609999872	25900000	1080000000	52000000	1300000000	27000000					33	31.5	31.5	31.5	131.29	0	101.61	30	4	23	7	29	4	C4M7I1	1723	>tr|C4M7I1|C4M7I1_ENTHI CXXC-rich protein OS=Entamoeba histolytica OX=5759 GN=EHI_111990 PE=3 SV=1
C4M8I4	IBR domain containing protein	EHI_120320	0.0175199	0.0664316	5.53974	24.8811	20.8034	25.5014	19	25.0401	19	30900000	1830000	47500000	0	34500000	0					2	7.1	7.1	7.1	32.527	0.0039977	1.832	1	1	2	0	2	0	C4M8I4	1804	>tr|C4M8I4|C4M8I4_ENTHI IBR domain containing protein OS=Entamoeba histolytica OX=5759 GN=EHI_120320 PE=4 SV=1
C4LXH7	Ubiquitin carboxyl-terminal hydrolase, putative	EHI_131090	0.00645184	0.0548842	5.53611	23.654	19	25.1015	19	24.8528	19	13200000	0	36000000	0	30300000	0					3	6.8	6.8	6.8	39.302	0	3.9464	1	0	3	0	2	0	C4LXH7	768	>tr|C4LXH7|C4LXH7_ENTHI Ubiquitin carboxyl-terminal hydrolase, putative OS=Entamoeba histolytica OX=5759 GN=EHI_131090 PE=4 SV=1
C4M7V5	Dolichyl-diphosphooligosaccharide--protein glycosyltransferase subunit 1	EHI_029540	0.0311438	0.0818626	5.53139	29.5352	22.0122	27.8385	23.4551	27.4473	22.7594	778000000	4230000	240000000	11500000	183000000	7100000					9	20.3	20.3	20.3	47.995	0	14.589	9	1	6	3	6	3	C4M7V5	1744	>tr|C4M7V5|C4M7V5_ENTHI Dolichyl-diphosphooligosaccharide--protein glycosyltransferase subunit 1 OS=Entamoeba histolytica OX=5759 GN=EHI_029540 PE=3 SV=1
C4M9M6	3-ketoacyl-CoA synthase	EHI_112870	0.0287326	0.0794323	5.53124	31.015	23.5983	31.0084	26.1214	30.5014	26.2114	2169999872	12700000	2160000000	73000000	1520000000	77700000					23	43.7	43.7	43.7	53.723	0	97.698	18	3	23	7	21	11	C4M9M6	1902	>tr|C4M9M6|C4M9M6_ENTHI 3-ketoacyl-CoA synthase OS=Entamoeba histolytica OX=5759 GN=EHI_112870 PE=3 SV=1
C4M2W0	PH-protein kinase domain containing protein	EHI_188930	0.00908141	0.0559259	5.52267	31.8937	25.3307	31.0609	26.2335	30.8534	25.6757	3990000128	42200000	2240000000	78900000	1940000000	53600000					18	45.7	45.7	18.2	50.339	0	123.96	16	5	15	7	15	6	C4M2W0	1290	>tr|C4M2W0|C4M2W0_ENTHI PH-protein kinase domain containing protein OS=Entamoeba histolytica OX=5759 GN=EHI_188930 PE=3 SV=1
C4LUS7	Uncharacterized protein	EHI_178620	0.0920008	0.157383	5.52255	26.5478	19	26.0914	19	25.8142	23.8858	98100000	0	71500000	0	59000000	15500000	+				1	11	11	11	15.102	1	-2	1	0	1	0	1	1	C4LUS7	465	>tr|C4LUS7|C4LUS7_ENTHI Uncharacterized protein OS=Entamoeba histolytica OX=5759 GN=EHI_178620 PE=4 SV=1
C4M7G2	Ubiquitin carboxyl-terminal hydrolase domain containing protein	EHI_158580	0.00172661	0.0487947	5.52173	24.9803	19	24.2679	19	24.317	19	33100000	0	20200000	0	20900000	0			+	Plus DTT_Minus DTT	2	1.6	1.6	1.6	153.91	0.0011898	2.1371	1	0	1	1	1	0	C4M7G2	1717	>tr|C4M7G2|C4M7G2_ENTHI Ubiquitin carboxyl-terminal hydrolase domain containing protein OS=Entamoeba histolytica OX=5759 GN=EHI_158580 PE=4 SV=1
C4M981	HEAT repeat domain containing protein	EHI_124870	0.0128661	0.0620854	5.51967	29.7211	22.9707	29.94	24.7846	29.3766	24.7234	885000000	8220000	1030000000	28900000	697000000	27700000					18	42.3	42.3	42.3	61.966	0	100.33	12	2	18	4	15	5	C4M981	1872	>tr|C4M981|C4M981_ENTHI HEAT repeat domain containing protein OS=Entamoeba histolytica OX=5759 GN=EHI_124870 PE=4 SV=1
C4M2S1	Uncharacterized protein	EHI_161040	0.0100176	0.0587614	5.51904	32.005	25.4234	30.94	25.6649	30.7613	26.0609	4310000128	45000000	2060000000	53200000	1820000000	70000000					14	75	75	75	20.711	0	205.3	13	5	12	5	13	7	C4M2S1	1277	>tr|C4M2S1|C4M2S1_ENTHI Uncharacterized protein OS=Entamoeba histolytica OX=5759 GN=EHI_161040 PE=4 SV=1
C4M1X3	Cysteine protease binding protein family 1	cpbf1	0.010294	0.0587806	5.51619	35.7428	29.1866	35.0592	29.6848	34.6787	30.0609	57500000256	611000000	35799998464	863000000	27499999232	1120000000					46	56.3	56.3	56.3	100.72	0	323.31	42	24	45	24	44	24	C4M1X3	1197	>tr|C4M1X3|C4M1X3_ENTHI Cysteine protease binding protein family 1 OS=Entamoeba histolytica OX=5759 GN=cpbf1 PE=2 SV=1
C4LYE6	Uncharacterized protein	EHI_008120	0.00260052	0.0487947	5.51442	30.611	24.6375	30.4629	24.895	30.2077	25.2058	1640000000	26100000	1480000000	31200000	1240000000	38700000			+	Plus DTT_Minus DTT	7	23.4	23.4	23.4	36.86	0	52.521	7	3	7	3	7	4	C4LYE6	851	>tr|C4LYE6|C4LYE6_ENTHI Uncharacterized protein OS=Entamoeba histolytica OX=5759 GN=EHI_008120 PE=4 SV=1
C4M1H3	Uncharacterized protein	EHI_192530	0.0249289	0.0753955	5.50813	26.2463	19	23.9406	19	23.3376	19	79600000	0	16100000	0	10600000	0					2	5.8	5.8	5.8	52.598	0	4.6994	2	0	1	0	1	0	C4M1H3	1152	>tr|C4M1H3|C4M1H3_ENTHI Uncharacterized protein OS=Entamoeba histolytica OX=5759 GN=EHI_192530 PE=4 SV=1
CON__Q05B55			0.0121394	0.0620459	6.30427	30.2979	23.0275	29.7864	23.0854	29.1435	24.2021	1320000000	8550000	926000000	8900000	593000000	19300000		+			7	33.3	33.3	33.3	26.59	0	141.9	6	1	4	1	5	2	CON__Q05B55	2100	>Q05B55 TREMBL:Q05B55 (Bos taurus) Similar to Ig kappa chain C region
C4M299	Serine/threonine-protein phosphatase	EHI_136190	0.00309097	0.0488391	5.50711	29.3217	23.2492	28.7771	23.7594	27.9428	22.5117	671000000	9970000	460000000	14200000	258000000	5980000			+	Plus DTT_Minus DTT	5	11.1	11.1	11.1	60.514	0	29.956	5	2	4	2	4	1	C4M299	1229	>tr|C4M299|C4M299_ENTHI Serine/threonine-protein phosphatase OS=Entamoeba histolytica OX=5759 GN=EHI_136190 PE=3 SV=1
C4LSP0	Elongator complex protein 3	EHI_152010	0.00814888	0.0559259	5.50488	30.9882	24.5463	30.1724	24.8336	29.8474	25.1135	2130000000	24500000	1210000000	29900000	966000000	36300000					13	22.9	22.9	22.9	65.765	0	32.704	13	5	12	4	9	5	C4LSP0	232	>tr|C4LSP0|C4LSP0_ENTHI Elongator complex protein 3 OS=Entamoeba histolytica OX=5759 GN=EHI_152010 PE=3 SV=1
Q95030	Cysteine proteinase	CP5	0.00487529	0.0515735	5.50107	32.5709	26.3926	32.2077	26.726	31.8937	27.0505	6380000256	88100000	4960000000	111000000	3990000128	139000000					19	62.6	62.6	62.6	34.759	0	319.72	18	9	18	11	19	9	Q95030	2295	>tr|Q95030|Q95030_ENTHI Cysteine proteinase OS=Entamoeba histolytica OX=5759 GN=CP5 PE=2 SV=2
C4LUC5	Uncharacterized protein	EHI_110780	0.00382109	0.0496409	5.47355	25.1488	19	24.0772	19	24.1946	19	37200000	0	17700000	0	19200000	0			+	Plus DTT_Minus DTT	3	7	7	7	50.846	0	3.6986	2	0	3	0	3	0	C4LUC5	417	>tr|C4LUC5|C4LUC5_ENTHI Uncharacterized protein OS=Entamoeba histolytica OX=5759 GN=EHI_110780 PE=4 SV=1
C4LVA3	Uncharacterized protein	EHI_182480	0.00944543	0.0569023	5.4731	25.5315	19	25.9383	20.85	23.7995	19	48500000	0	64300000	1890000	14600000	0					3	6	6	6	61.541	0	5.6383	2	0	2	1	1	0	C4LVA3	512	>tr|C4LVA3|C4LVA3_ENTHI Uncharacterized protein OS=Entamoeba histolytica OX=5759 GN=EHI_182480 PE=4 SV=1
C4M6P9;B1N4R6	Leukocyte-endothelial cell adhesion molecule 3, putative;Uncharacterized protein	EHI_201200;EHI_172280	0.00423237	0.0515364	5.4714	28.0965	21.9316	27.6527	22.6757	27.6181	22.3457	287000000	4000000	211000000	6700000	206000000	5330000					9	23.1	23.1	23.1	35.925	0	15.898	6	2	6	2	7	1	C4M6P9;B1N4R6	1646	>tr|C4M6P9|C4M6P9_ENTHI Leukocyte-endothelial cell adhesion molecule 3, putative OS=Entamoeba histolytica OX=5759 GN=EHI_201200 PE=2 SV=1;>tr|B1N4R6|B1N4R6_ENTHI Uncharacterized protein OS=Entamoeba histolytica OX=5759 GN=EHI_172280 PE=4 SV=1
C4LU27	Uncharacterized protein	EHI_068340	0.011037	0.0602737	5.46958	27.5826	20.9601	28.1263	23.1316	27.1507	22.3592	201000000	2040000	293000000	9190000	149000000	5380000					7	10.2	10.2	10.2	90.707	0	20.001	5	1	7	2	6	1	C4LU27	381	>tr|C4LU27|C4LU27_ENTHI Uncharacterized protein OS=Entamoeba histolytica OX=5759 GN=EHI_068340 PE=4 SV=1
C4M296	Calreticulin	EHI_136160	0.0233653	0.0731721	5.46861	36.8631	29.6931	35.7403	31.1544	35.4883	30.8385	124999999488	868000000	57400000512	2390000128	48199999488	1920000000					56	82.3	82.3	82.3	45.08	0	323.31	56	24	50	32	52	29	C4M296	1226	>tr|C4M296|C4M296_ENTHI Calreticulin OS=Entamoeba histolytica OX=5759 GN=EHI_136160 PE=3 SV=1
C4LTM0	Gal/GalNAc lectin heavy subunit	EHI_012270	0.0297912	0.0801644	5.46859	35.6655	28.2803	34.3763	29.6612	34.1529	29.8474	54499999744	326000000	22300000256	849000000	19100000256	966000000					60	73.5	44.9	44.9	144.33	0	323.31	58	19	53	28	52	29	C4LTM0	328	>tr|C4LTM0|C4LTM0_ENTHI Gal/GalNAc lectin heavy subunit OS=Entamoeba histolytica OX=5759 GN=EHI_012270 PE=4 SV=1
C4M4Z3	Uncharacterized protein	EHI_035130	0.00707774	0.0559259	5.46241	29.2054	23.5754	28.3662	22.2006	27.9428	23.3511	619000000	12500000	346000000	4820000	258000000	10700000					7	14.4	14.4	14.4	53.203	0	8.775	6	1	7	1	7	1	C4M4Z3	1493	>tr|C4M4Z3|C4M4Z3_ENTHI Uncharacterized protein OS=Entamoeba histolytica OX=5759 GN=EHI_035130 PE=3 SV=1
C4M3J4	Uncharacterized protein	EHI_138520	0.00599281	0.0540667	5.46144	27.0401	21.928	25.3066	19	26.3031	21.3376	138000000	3990000	41500000	0	82800000	2650000					6	7.5	7.5	7.5	111.48	0	20.75	6	1	2	0	4	2	C4M3J4	1352	>tr|C4M3J4|C4M3J4_ENTHI Uncharacterized protein OS=Entamoeba histolytica OX=5759 GN=EHI_138520 PE=4 SV=1
C4M9X6	Uncharacterized protein	EHI_179360	0.000726868	0.0487947	5.45846	24.7441	19	24.3778	19	24.2535	19	28100000	0	21800000	0	20000000	0			+	Plus DTT_Minus DTT	1	4.5	4.5	4.5	27.878	0.0049945	1.6517	1	0	1	0	1	0	C4M9X6	1926	>tr|C4M9X6|C4M9X6_ENTHI Uncharacterized protein OS=Entamoeba histolytica OX=5759 GN=EHI_179360 PE=4 SV=1
C4M1J6	Uncharacterized protein	EHI_001180	0.016678	0.065918	5.45475	28.1015	21.4118	27.5609	22.1047	26.9428	22.7244	288000000	2790000	198000000	4510000	129000000	6930000					6	21	21	21	30.928	0	9.6453	5	1	6	1	5	2	C4M1J6;B1N3C1	1161	>tr|C4M1J6|C4M1J6_ENTHI Uncharacterized protein OS=Entamoeba histolytica OX=5759 GN=EHI_001180 PE=4 SV=1
C4LY32	Uncharacterized protein	EHI_177180	0.0078745	0.0559259	5.45393	29.3282	22.9098	28.6355	23.7796	28.4113	23.3239	674000000	7880000	417000000	14400000	357000000	10500000					6	21.2	21.2	21.2	35.236	0	55.443	5	1	6	2	6	1	C4LY32	819	>tr|C4LY32|C4LY32_ENTHI Uncharacterized protein OS=Entamoeba histolytica OX=5759 GN=EHI_177180 PE=4 SV=1
C4LW41	E3 ubiquitin-protein ligase	EHI_141950	0.0309171	0.0818084	5.45232	26.2838	19	24.1488	19	22.9243	19	81700000	0	18600000	0	7960000	0	+				2	1.9	1.9	1.9	143.51	1	-2	2	0	1	0	1	0	C4LW41	618	>tr|C4LW41|C4LW41_ENTHI E3 ubiquitin-protein ligase OS=Entamoeba histolytica OX=5759 GN=EHI_141950 PE=3 SV=1
C4LY44	ATPase ASNA1 homolog	EHI_177400	0.00459875	0.0515735	5.45042	30.4919	24.3307	30.933	25.654	30.341	25.4298	1510000000	21100000	2050000000	52800000	1360000000	45200000					11	45.9	45.9	45.9	36.292	0	88.316	10	3	11	5	11	4	C4LY44	824	>sp|C4LY44|ASNA_ENTHI ATPase ASNA1 homolog OS=Entamoeba histolytica OX=5759 GN=EHI_177400 PE=3 SV=1
C4M8H9	Nucleosome assembly protein, putative	EHI_120340	0.00491455	0.0515735	5.44511	25.1253	19	24.4105	19	23.7995	19	36600000	0	22300000	0	14600000	0					1	3.4	3.4	3.4	30.947	0.0054945	1.5744	1	0	1	0	1	0	C4M8H9	1803	>tr|C4M8H9|C4M8H9_ENTHI Nucleosome assembly protein, putative OS=Entamoeba histolytica OX=5759 GN=EHI_120340 PE=3 SV=1
C4LZR6	Sec7 domain protein	EHI_038940	0.0625503	0.121028	5.44332	27.2625	19	25.8504	21.4067	24.848	21.2243	161000000	0	60500000	2780000	30200000	2450000					7	4.2	4.2	4.2	193.52	0	9.0899	6	0	4	1	3	1	C4LZR6	983	>tr|C4LZR6|C4LZR6_ENTHI Sec7 domain protein OS=Entamoeba histolytica OX=5759 GN=EHI_038940 PE=4 SV=1
C4MBB6;C4MB41;C4M7D7;B1N540;B1N3Y4	Endonuclease V, putative	EHI_101390;EHI_193830	0.00439181	0.0515364	5.44036	24.8385	19	24.7645	19	23.7182	19	30000000	0	28500000	0	13800000	0	+				1	2.9	2.9	2.9	26.545	1	-2	1	0	1	0	1	0	C4MBB6;C4MB41;C4M7D7;B1N540;B1N3Y4	102	>tr|C4MBB6|C4MBB6_ENTHI Endonuclease V, putative OS=Entamoeba histolytica OX=5759 GN=EHI_101390 PE=4 SV=1;>tr|C4MB41|C4MB41_ENTHI Endonuclease V, putative OS=Entamoeba histolytica OX=5759 GN=EHI_193830 PE=4 SV=1;>tr|C4M7D7|C4M7D7_ENTHI Endonuclease V, puta
C4M6Q4	Peroxiredoxin	EHI_201250	0.0338641	0.0850035	5.44002	26.4282	19	22.9968	19	23.895	19	90300000	0	8370000	0	15600000	0					1	80.3	6.8	6.8	26.379	0	21.48	1	0	1	0	1	0	C4M6Q4	1648	>tr|C4M6Q4|C4M6Q4_ENTHI Peroxiredoxin OS=Entamoeba histolytica OX=5759 GN=EHI_201250 PE=3 SV=1
C4LYK7	Golgi membrane protein, putative	EHI_118460	0.00122251	0.0487947	5.43682	24.7389	19	24.4862	19	24.0854	19	28000000	0	23500000	0	17800000	0			+	Plus DTT_Minus DTT	1	4.9	4.9	4.9	27.239	0	3.9597	1	0	1	0	1	0	C4LYK7	870	>tr|C4LYK7|C4LYK7_ENTHI Golgi membrane protein, putative OS=Entamoeba histolytica OX=5759 GN=EHI_118460 PE=4 SV=1
C4LYD8	Uncharacterized protein	EHI_008020	0.0254948	0.0757605	5.43207	26.067	22.3725	25.5869	19	25.0148	19	70300000	5430000	50400000	0	33900000	0	+				1	0.9	0.9	0.9	99.269	1	-2	1	1	1	0	1	0	C4LYD8	847	>tr|C4LYD8|C4LYD8_ENTHI Uncharacterized protein OS=Entamoeba histolytica OX=5759 GN=EHI_008020 PE=4 SV=1
C4M932	Acyl-CoA:1-acylglycerol-3-phosphate acyltransferase, putative	EHI_097610	0.00161558	0.0487947	5.43019	24.3975	19	24.824	19	24.0691	19	22100000	0	29700000	0	17600000	0			+	Plus DTT_Minus DTT	1	2.8	2.8	2.8	38.472	0.0011876	2.1282	1	0	1	0	1	0	C4M932	1857	>tr|C4M932|C4M932_ENTHI Acyl-CoA:1-acylglycerol-3-phosphate acyltransferase, putative OS=Entamoeba histolytica OX=5759 GN=EHI_097610 PE=3 SV=1
C4MBF6	Uncharacterized protein	EHI_161650	0.0410521	0.0932773	5.42772	30.5844	23.0821	29.2736	25.6811	29.5259	24.3376	1610000000	8880000	649000000	53800000	773000000	21200000					17	33.1	27.6	27.6	95.919	0	103.27	14	3	10	6	15	4	C4MBF6	2026	>tr|C4MBF6|C4MBF6_ENTHI Uncharacterized protein OS=Entamoeba histolytica OX=5759 GN=EHI_161650 PE=4 SV=1
C4M934	Phospholipase B-like	EHI_097630	0.0204481	0.0701213	5.42732	28.17	22.6209	28.7802	22.0526	27.7129	23.7077	302000000	6450000	461000000	4350000	220000000	13700000					9	20.6	20.6	20.6	59.372	0	21.37	6	2	9	1	5	2	C4M934	1858	>tr|C4M934|C4M934_ENTHI Phospholipase B-like OS=Entamoeba histolytica OX=5759 GN=EHI_097630 PE=3 SV=1
Q761W9	PH-protein kinase domain containing protein	EHI_138540	0.0427504	0.0955859	5.42022	27.141	22.5045	26.6998	19	26.632	22.7077	148000000	5950000	109000000	0	104000000	6850000					3	6.2	6.2	6.2	53.035	0	5.4642	3	1	2	0	3	1	Q761W9	2279	>tr|Q761W9|Q761W9_ENTHI PH-protein kinase domain containing protein OS=Entamoeba histolytica OX=5759 GN=EHI_138540 PE=2 SV=1
C4LT47	Gal/GalNAc lectin light subunit	EHI_148790	0.0173878	0.0664316	5.41469	34.3763	27.5165	33.0832	28.3282	32.9574	28.3282	22300000256	192000000	9100000256	337000000	8339999744	337000000					18	80.4	73.3	53.7	31.582	0	323.31	18	10	18	13	18	12	C4LT47	285	>tr|C4LT47|C4LT47_ENTHI Gal/GalNAc lectin light subunit OS=Entamoeba histolytica OX=5759 GN=EHI_148790 PE=4 SV=1
Q5FHZ3	Transposase	LBA1881	0.00876968	0.0559259	5.41047	25.3066	19	24.3844	19	23.5404	19	41500000	0	21900000	0	12200000	0	+				1	2.4	2.4	2.4	34.873	1	-2	1	0	1	0	1	0	Q5FHZ3	2198	>tr|Q5FHZ3|Q5FHZ3_LACAC Transposase OS=Lactobacillus acidophilus (strain ATCC 700396 / NCK56 / N2 / NCFM) OX=272621 GN=LBA1881 PE=3 SV=1
G1UB55	HTH cro/C1-type domain-containing protein	LBA0867	0.0509064	0.106141	5.40455	26.8858	19	24.7695	21.0625	23.6209	19	124000000	0	28600000	2190000	12900000	0	+				1	4.5	4.5	4.5	31.396	1	-2	1	0	1	1	1	0	G1UB55	2141	>tr|G1UB55|G1UB55_LACAC HTH cro/C1-type domain-containing protein OS=Lactobacillus acidophilus (strain ATCC 700396 / NCK56 / N2 / NCFM) OX=272621 GN=LBA0867 PE=4 SV=1
C4LXD5	NEDD8-activating enzyme E1 catalytic subunit	EHI_098550	0.0399073	0.091605	5.39523	27.7771	22.7614	29.2692	21.7876	28.4629	24.7745	230000000	7110000	647000000	3620000	370000000	28700000					10	24.4	24.4	24.4	46.734	0	58.765	3	3	9	2	8	5	C4LXD5	752	>tr|C4LXD5|C4LXD5_ENTHI NEDD8-activating enzyme E1 catalytic subunit OS=Entamoeba histolytica OX=5759 GN=EHI_098550 PE=3 SV=1
C4LYJ7	Galactokinase, putative	EHI_094100	0.0130259	0.0620854	5.38866	34.547	28.17	33.87	28.3239	33.1574	28.9146	25099999232	302000000	15699999744	336000000	9580000256	506000000					26	65	65	65	43.432	0	317.02	26	17	23	15	23	16	C4LYJ7;Q5FLL0	868	>tr|C4LYJ7|C4LYJ7_ENTHI Galactokinase, putative OS=Entamoeba histolytica OX=5759 GN=EHI_094100 PE=2 SV=1
C4M698	Uncharacterized protein	EHI_081710	0.0224444	0.0720329	5.38707	29.3494	22.3457	28.3578	24.0275	28.391	23.5638	684000000	5330000	344000000	17100000	352000000	12400000					6	23.6	23.6	23.6	36.657	0	18.802	5	1	5	2	6	2	C4M698	1612	>tr|C4M698|C4M698_ENTHI Uncharacterized protein OS=Entamoeba histolytica OX=5759 GN=EHI_081710 PE=4 SV=1
C4LUP3	Uncharacterized protein	EHI_023320	0.0237342	0.0731721	5.37962	28.066	21.4273	26.3545	22.5777	24.7234	19	281000000	2820000	85800000	6260000	27700000	0					3	3	3	3	119.62	0	3.1529	3	1	2	1	2	0	C4LUP3	450	>tr|C4LUP3|C4LUP3_ENTHI Uncharacterized protein OS=Entamoeba histolytica OX=5759 GN=EHI_023320 PE=4 SV=1
C4M0B6	Heat shock protein 70, putative	EHI_064470	0.0338084	0.0850035	5.37731	27.4938	21.265	25.6012	22.2448	27.2353	20.6886	189000000	2520000	50900000	4970000	158000000	1690000					4	7.7	7.7	7.7	57.999	0	5.9118	1	1	2	1	3	2	C4M0B6	1043	>tr|C4M0B6|C4M0B6_ENTHI Heat shock protein 70, putative OS=Entamoeba histolytica OX=5759 GN=EHI_064470 PE=3 SV=1
C4MB24	Serine/threonine-protein phosphatase	EHI_176170	0.0496392	0.104793	5.3744	28.267	20.417	26.632	22.2764	26.4908	22.5731	323000000	1400000	104000000	5080000	94300000	6240000					6	22.5	22.5	22.5	34.798	0	10.718	6	1	5	2	6	2	C4MB24;C4M495;C4M9T0	1998	>tr|C4MB24|C4MB24_ENTHI Serine/threonine-protein phosphatase OS=Entamoeba histolytica OX=5759 GN=EHI_176170 PE=3 SV=1
C4LV53	Dipeptidyl-peptidase, putative	EHI_182720	0.0277749	0.0789038	5.37422	30.5389	24.867	30.341	23.5522	29.3431	25.6811	1560000000	30600000	1360000000	12300000	681000000	53800000					15	27.5	27.5	27.5	75.528	0	117.08	13	3	15	2	14	8	C4LV53	499	>tr|C4LV53|C4LV53_ENTHI Dipeptidyl-peptidase, putative OS=Entamoeba histolytica OX=5759 GN=EHI_182720 PE=4 SV=1
C4LT93	UMP-CMP kinase, putative	EHI_044740	0.00215121	0.0487947	5.37028	24.8528	19	24.239	19	24.019	19	30300000	0	19800000	0	17000000	0			+	Plus DTT_Minus DTT	1	9.5	9.5	9.5	22.961	0	4.3532	1	0	1	0	1	0	C4LT93	297	>tr|C4LT93|C4LT93_ENTHI UMP-CMP kinase, putative OS=Entamoeba histolytica OX=5759 GN=EHI_044740 PE=2 SV=1
C4LVL1	Uncharacterized protein	EHI_103670	0.00525118	0.053204	5.36909	25.0275	19	24.4041	19	23.6757	19	34200000	0	22200000	0	13400000	0					2	5.3	5.3	5.3	37.495	0.0012698	2.6496	2	0	1	0	1	0	C4LVL1	547	>tr|C4LVL1|C4LVL1_ENTHI Uncharacterized protein OS=Entamoeba histolytica OX=5759 GN=EHI_103670 PE=4 SV=1
C4LSH1	Uncharacterized protein	EHI_151280	0.0376294	0.0882888	5.36876	26.3256	19	25.4234	21.7915	24.1488	19	84100000	0	45000000	3630000	18600000	0					3	5.8	5.8	5.8	68.778	0	7.3558	3	0	2	1	1	0	C4LSH1	212	>tr|C4LSH1|C4LSH1_ENTHI Uncharacterized protein OS=Entamoeba histolytica OX=5759 GN=EHI_151280 PE=4 SV=1
C4M7K9	Thioredoxin, putative	EHI_170420	0.00930642	0.0566776	5.36716	33.3956	27.019	32.9277	27.8385	32.2952	27.6595	11299999744	136000000	8169999872	240000000	5270000128	212000000					5	36.1	26.9	26.9	13.333	0	38.714	4	2	4	3	5	4	C4M7K9	1727	>tr|C4M7K9|C4M7K9_ENTHI Thioredoxin, putative OS=Entamoeba histolytica OX=5759 GN=EHI_170420 PE=4 SV=1
C4LXC6	Phosphatidylinositol-3,4,5-trisphosphate 3-phosphatase, putative	EHI_098450	0.0292667	0.0796902	5.36325	25.1214	19	25.8215	22.3239	25.4707	19	36500000	0	59300000	5250000	46500000	0					2	4.2	3.3	3.3	115.81	0	3.07	1	0	2	1	2	0	C4LXC6	746	>tr|C4LXC6|C4LXC6_ENTHI Phosphatidylinositol-3,4,5-trisphosphate 3-phosphatase, putative OS=Entamoeba histolytica OX=5759 GN=EHI_098450 PE=4 SV=1
Q1EQ41	EhEmp24C	EHI_023070	0.00172903	0.0487947	5.36269	29.1189	23.654	30.1115	24.4234	29.5278	24.5926	583000000	13200000	1160000000	22500000	774000000	25300000			+	Plus DTT_Minus DTT	8	34.3	34.3	34.3	25.317	0	43.099	6	1	8	1	7	1	Q1EQ41	2170	>tr|Q1EQ41|Q1EQ41_ENTHI EhEmp24C OS=Entamoeba histolytica OX=5759 GN=EHI_023070 PE=2 SV=1
C4M8M8	Uncharacterized protein	EHI_114330	0.0846663	0.148599	5.36233	27.5389	22.9795	27.5682	19	26.6458	23.6865	195000000	8270000	199000000	0	105000000	13500000					5	23.6	23.6	23.6	25.249	0	9.2968	4	2	5	0	5	4	C4M8M8	1814	>tr|C4M8M8|C4M8M8_ENTHI Uncharacterized protein OS=Entamoeba histolytica OX=5759 GN=EHI_114330 PE=4 SV=1
C4M947	Mob1/phocein family protein	EHI_083630	0.0659735	0.125473	5.36151	26.2714	19	25.3612	22.8442	25.2961	19	81000000	0	43100000	7530000	41200000	0	+				1	3.7	3.7	3.7	24.853	1	-2	1	0	1	1	1	0	C4M947	1865	>tr|C4M947|C4M947_ENTHI Mob1/phocein family protein OS=Entamoeba histolytica OX=5759 GN=EHI_083630 PE=4 SV=1
C4LY61	Uncharacterized protein	EHI_051420	0.0379732	0.0884454	5.35715	26.3578	21.743	26.4754	19	25.8312	21.85	86000000	3510000	93300000	0	59700000	3780000					4	5.3	5.3	5.3	105.52	0	22.931	4	1	3	0	3	1	C4LY61	828	>tr|C4LY61|C4LY61_ENTHI Uncharacterized protein OS=Entamoeba histolytica OX=5759 GN=EHI_051420 PE=4 SV=1
CON__REFSEQ:XP_001252647;CON__A2I7N3			0.0134503	0.0621874	3.24564	28.9031	25.3031	28.1312	24.48	27.7064	25.2207	502000000	41400000	294000000	23400000	219000000	39100000		+			4	8.2	8.2	6.2	46.897	0.0012136	2.2714	3	1	2	1	4	1	CON__REFSEQ:XP_001252647;CON__A2I7N3	2139	>REFSEQ:XP_001252647 (Bos taurus) similar to endopin 2B;>A2I7N3 TREMBL:A2I7N3;Q27984 (Bos taurus) SERPINA3-7
C4M4G9	PH-protein kinase domain containing protein	EHI_042150	0.0274403	0.0785167	5.35182	25.6971	19	22.6298	19	24.7286	19	54400000	0	6490000	0	27800000	0					2	33	5.5	5.5	50.594	0.0055218	1.6013	2	0	1	0	2	0	C4M4G9;C4M933	1454	>tr|C4M4G9|C4M4G9_ENTHI PH-protein kinase domain containing protein OS=Entamoeba histolytica OX=5759 GN=EHI_042150 PE=3 SV=1
C4M8G4	Uncharacterized protein	EHI_062960	0.0168679	0.0659748	5.35139	25.6292	19	24.2243	19	23.2006	19	51900000	0	19600000	0	9640000	0					1	4.9	4.9	4.9	23.889	0.0012829	2.7202	1	0	1	0	1	0	C4M8G4	1796	>tr|C4M8G4|C4M8G4_ENTHI Uncharacterized protein OS=Entamoeba histolytica OX=5759 GN=EHI_062960 PE=4 SV=1
C4LY94	Nuclear transport receptor, putative	EHI_166900	0.0111625	0.0602737	5.34458	29.6475	23.7286	28.7162	24.5105	28.965	23.0559	841000000	13900000	441000000	23900000	524000000	8720000					14	15	15	15	105.62	0	64.487	11	5	11	5	12	4	C4LY94	836	>tr|C4LY94|C4LY94_ENTHI Nuclear transport receptor, putative OS=Entamoeba histolytica OX=5759 GN=EHI_166900 PE=4 SV=1
C4LYC2	Sir2 family transcriptional regulator, putative	EHI_007500	0.0503322	0.105641	5.32096	26.1449	19	24.867	19	24.6649	21.714	74200000	0	30600000	0	26600000	3440000					1	4.9	4.9	4.9	38.834	0	3.1263	1	0	1	0	1	1	C4LYC2	844	>tr|C4LYC2|C4LYC2_ENTHI Sir2 family transcriptional regulator, putative OS=Entamoeba histolytica OX=5759 GN=EHI_007500 PE=3 SV=1
C4M015	Uncharacterized protein	EHI_134660	0.00142738	0.0487947	5.31985	29.7227	24.5638	30.0349	24.9539	28.8623	23.1426	886000000	24800000	1100000000	32500000	488000000	9260000			+	Plus DTT_Minus DTT	17	50.7	50.7	50.7	41.713	0	80.83	15	4	14	2	14	2	C4M015	1015	>tr|C4M015|C4M015_ENTHI Uncharacterized protein OS=Entamoeba histolytica OX=5759 GN=EHI_134660 PE=4 SV=1
C4M2J3	60S ribosomal protein L17, putative	EHI_054740	0.0861915	0.150683	5.31496	26.9539	19	24.7695	19	25.2607	23.0393	130000000	0	28600000	0	40200000	8620000					1	35.8	6.1	6.1	19.823	0.0012706	2.6535	1	0	1	0	1	1	C4M2J3	1253	>tr|C4M2J3|C4M2J3_ENTHI 60S ribosomal protein L17, putative OS=Entamoeba histolytica OX=5759 GN=EHI_054740 PE=3 SV=1
C4LYV8	Uncharacterized protein	EHI_010710	0.0250545	0.0754062	5.30792	28.7325	23.2679	29.6561	22.9495	28.5862	24.8336	446000000	10100000	846000000	8100000	403000000	29900000					4	14.2	14.2	14.2	46.332	0	25.951	3	2	4	1	4	2	C4LYV8	903	>tr|C4LYV8|C4LYV8_ENTHI Uncharacterized protein OS=Entamoeba histolytica OX=5759 GN=EHI_010710 PE=4 SV=1
C4LWD8	ER membrane protein complex subunit 1	EHI_096250	0.0243495	0.0746562	5.30556	31.8081	24.8433	30.5389	26.3256	30.1842	25.4457	3760000000	30100000	1560000000	84100000	1220000000	45700000					20	29.7	29.7	29.7	69.817	0	117.44	19	5	15	8	15	8	C4LWD8	644	>tr|C4LWD8|C4LWD8_ENTHI ER membrane protein complex subunit 1 OS=Entamoeba histolytica OX=5759 GN=EHI_096250 PE=3 SV=1
C4LTM9	Rab family GTPase	EHI_012380	0.00381745	0.0496409	5.2987	26.7895	21.0359	26.6998	21.2185	26.2481	21.5869	116000000	2150000	109000000	2440000	79700000	3150000			+	Plus DTT_Minus DTT	3	12.6	12.6	12.6	26.646	0	8.7131	3	1	3	1	3	1	C4LTM9	334	>tr|C4LTM9|C4LTM9_ENTHI Rab family GTPase OS=Entamoeba histolytica OX=5759 GN=EHI_012380 PE=3 SV=1
C4LW32	Phosphoinositide phosphatase, putative	EHI_141860	0.00474065	0.0515735	5.29813	30.0737	24.3376	30.2193	24.632	29.5426	24.9716	1130000000	21200000	1250000000	26000000	782000000	32900000					16	28.5	28.5	28.5	67.831	0	93.21	13	6	15	5	15	6	C4LW32	614	>tr|C4LW32|C4LW32_ENTHI Phosphoinositide phosphatase, putative OS=Entamoeba histolytica OX=5759 GN=EHI_141860 PE=4 SV=1
C4LTD8	Thioredoxin, putative	EHI_045250	0.0205003	0.0701922	5.29144	26.6458	21.0359	25.4362	19	25.0526	21.2243	105000000	2150000	45400000	0	34800000	2450000					4	7.6	7.6	7.6	57.167	0	7.892	3	1	2	0	2	1	C4LTD8	308	>tr|C4LTD8|C4LTD8_ENTHI Thioredoxin, putative OS=Entamoeba histolytica OX=5759 GN=EHI_045250 PE=4 SV=1
C4M8S2	Ras-GEF domain-containing protein	EHI_181600	0.018522	0.0674601	5.26924	26.5492	22.0359	26.4661	21.895	25.7234	19	98200000	4300000	92700000	3900000	55400000	0					3	5.6	5.6	5.6	66.937	0	4.8681	2	1	3	1	2	0	C4M8S2	1823	>tr|C4M8S2|C4M8S2_ENTHI Ras-GEF domain-containing protein OS=Entamoeba histolytica OX=5759 GN=EHI_181600 PE=4 SV=1
Q5NSY1	Rab family GTPase (Fragment)	EhRabX35	0.00490196	0.0515735	5.26392	24.8764	19	24.317	19	23.5983	19	30800000	0	20900000	0	12700000	0					2	11.9	11.9	11.9	21.929	0.0074746	1.3877	1	0	1	0	2	0	Q5NSY1	2252	>tr|Q5NSY1|Q5NSY1_ENTHI Rab family GTPase (Fragment) OS=Entamoeba histolytica OX=5759 GN=EhRabX35 PE=3 SV=1
C4MAS9	Methionine gamma-lyase	EHI_144610	0.0160036	0.0652139	5.25337	25.5983	19	23.6096	19	23.5522	19	50800000	0	12800000	0	12300000	0	+				1	5.1	1.8	1.8	42.188	1	-2	1	0	1	0	1	0	C4MAS9	1980	>tr|C4MAS9|C4MAS9_ENTHI Methionine gamma-lyase OS=Entamoeba histolytica OX=5759 GN=EHI_144610 PE=2 SV=1
C4M041	Villidin, putative	EHI_021260	0.135754	0.211279	5.24476	27.0505	19	25.6838	19	24.7492	23.7492	139000000	0	53900000	0	28200000	14100000					3	2.6	2.6	2	124.49	0.0011869	2.1245	2	0	1	0	1	2	C4M041	1025	>tr|C4M041|C4M041_ENTHI Villidin, putative OS=Entamoeba histolytica OX=5759 GN=EHI_021260 PE=4 SV=1
C4M0W6	UDP-glucose:glycoprotein glucosyltransferase, putative	EHI_015280	0.026836	0.0776848	5.24138	33.2336	26.2445	32.1453	27.8916	31.7965	27.3153	10099999744	79500000	4750000128	249000000	3729999872	167000000					54	44.6	44.6	44.6	150	0	323.31	50	14	46	25	43	20	C4M0W6;B1N4X9	1097	>tr|C4M0W6|C4M0W6_ENTHI UDP-glucose:glycoprotein glucosyltransferase, putative OS=Entamoeba histolytica OX=5759 GN=EHI_015280 PE=4 SV=1
C4M8N3	Galactose-specific adhesin 170kD subunit	EHI_077500	0.0305057	0.0813364	5.24103	37.6655	30.5573	36.402	31.9574	36.3336	32.1634	217999998976	1580000000	90799996928	4169999872	86599999488	4809999872					145	74.8	74.8	8.9	145.09	0	323.31	141	61	132	76	133	80	C4M8N3	1815	>tr|C4M8N3|C4M8N3_ENTHI Galactose-specific adhesin 170kD subunit OS=Entamoeba histolytica OX=5759 GN=EHI_077500 PE=4 SV=1
C4LXZ9	Galactose-inhibitable lectin 35 kDa subunit	EHI_035690	0.0122553	0.0620459	5.23581	34.2048	27.8019	32.9916	28.267	33.0034	28.4234	19800000512	234000000	8540000256	323000000	8609999872	360000000					22	77.4	77.4	49.7	33.594	0	191.7	19	11	19	12	21	11	C4LXZ9	811	>tr|C4LXZ9|C4LXZ9_ENTHI Galactose-inhibitable lectin 35 kDa subunit OS=Entamoeba histolytica OX=5759 GN=EHI_035690 PE=4 SV=1
C4M6V2	Uncharacterized protein	EHI_170590	0.0882992	0.153047	5.23304	26.2571	19	25.5165	19	25.7543	23.8288	80200000	0	48000000	0	56600000	14900000					1	10	10	10	21.436	0	19.657	1	0	1	0	1	1	C4M6V2	1656	>tr|C4M6V2|C4M6V2_ENTHI Uncharacterized protein OS=Entamoeba histolytica OX=5759 GN=EHI_170590 PE=4 SV=1
Q1EQ05;C4LT43	EhSyntaxin 16 (Fragment);Syntaxin, putative	EHI_164320;EHI_148750	0.104959	0.173685	5.23273	24.918	23.3239	26.5696	19	25.5345	19	31700000	10500000	99600000	0	48600000	0					1	4.7	4.7	4.7	32.135	0	8.0141	1	1	1	0	1	0	Q1EQ05;C4LT43	281	>tr|Q1EQ05|Q1EQ05_ENTHI EhSyntaxin 16 (Fragment) OS=Entamoeba histolytica OX=5759 GN=EHI_164320 PE=4 SV=1;>tr|C4LT43|C4LT43_ENTHI Syntaxin, putative OS=Entamoeba histolytica OX=5759 GN=EHI_148750 PE=4 SV=1
C4LTM7	Uncharacterized protein	EHI_012340	0.0251295	0.0754062	5.22624	32.6132	25.7129	31.4334	26.8504	31.225	27.0296	6569999872	55000000	2900000000	121000000	2510000128	137000000					32	43.4	43.4	38.1	98.273	0	285.98	28	12	26	13	27	16	C4LTM7	333	>tr|C4LTM7|C4LTM7_ENTHI Uncharacterized protein OS=Entamoeba histolytica OX=5759 GN=EHI_012340 PE=4 SV=1
B1N3C2	Plasma membrane calcium-transporting ATPase 1, putative	EHI_001150	0.00484615	0.0515735	5.22474	26.673	20.7471	26.239	21.1886	25.767	21.0691	107000000	1760000	79200000	2390000	57100000	2200000					4	9.5	4.1	4.1	76.545	0	4.4258	3	1	3	1	2	1	B1N3C2	70	>tr|B1N3C2|B1N3C2_ENTHI Plasma membrane calcium-transporting ATPase 1, putative OS=Entamoeba histolytica OX=5759 GN=EHI_001150 PE=4 SV=1
B1N5H3	Poly(ADP-ribose) glycohydrolase (Fragment)	EHI_072630	0.0738221	0.134703	5.21504	27.6251	22.3831	26.4105	23.8093	26.8019	19	207000000	5470000	89200000	14700000	117000000	0	+				1	2.1	2.1	2.1	45.27	1	-2	1	1	1	1	1	0	B1N5H3	171	>tr|B1N5H3|B1N5H3_ENTHI Poly(ADP-ribose) glycohydrolase (Fragment) OS=Entamoeba histolytica OX=5759 GN=EHI_072630 PE=3 SV=1
C4M181	Peptidyl-prolyl cis-trans isomerase	EHI_188070	0.0451967	0.0992547	5.21349	25.3444	19	25.3778	19	25.1833	22.265	42600000	0	43600000	0	38100000	5040000					2	16.4	16.4	16.4	13.036	0	8.8329	2	0	1	0	1	1	C4M181	1126	>tr|C4M181|C4M181_ENTHI Peptidyl-prolyl cis-trans isomerase OS=Entamoeba histolytica OX=5759 GN=EHI_188070 PE=4 SV=1
C4M3T4	Vesicle transport protein	EHI_163530	0.100044	0.167793	5.21233	27.7833	19	27.7195	24.2821	27.2353	23.8191	231000000	0	221000000	20400000	158000000	14800000					1	15.3	15.3	15.3	18.367	0	79.34	1	0	1	1	1	1	C4M3T4	1384	>tr|C4M3T4|C4M3T4_ENTHI Vesicle transport protein OS=Entamoeba histolytica OX=5759 GN=EHI_163530 PE=3 SV=1
C4LSZ7	Obg-like ATPase 1	EHI_148270	0.0140531	0.062705	5.20264	32.5343	26.1312	31.6329	26.7389	31.2869	26.976	6220000256	73500000	3329999872	112000000	2620000000	132000000					15	54.5	54.5	54.5	44.338	0	210.34	15	7	15	7	14	6	C4LSZ7	266	>tr|C4LSZ7|C4LSZ7_ENTHI Obg-like ATPase 1 OS=Entamoeba histolytica OX=5759 GN=EHI_148270 PE=3 SV=1
C4M5T4;B1N4B2	Uncharacterized protein	EHI_081920;EHI_077510	0.00342374	0.0492489	5.19714	27.8019	22.6409	28.1015	22.3592	27.5682	22.8802	234000000	6540000	288000000	5380000	199000000	7720000			+	Plus DTT_Minus DTT	9	10.5	10.5	10.5	95.929	0	21.754	8	2	8	1	7	2	C4M5T4;B1N4B2;B1N5K1;B1N580	1568	>tr|C4M5T4|C4M5T4_ENTHI Uncharacterized protein OS=Entamoeba histolytica OX=5759 GN=EHI_081920 PE=4 SV=1;>tr|B1N4B2|B1N4B2_ENTHI Uncharacterized protein OS=Entamoeba histolytica OX=5759 GN=EHI_077510 PE=4 SV=1
C4LXU8	Cysteine protease binding protein family 2	cpbf2	0.0573283	0.114378	5.19518	26.7771	19	26.0975	21.9207	25.5812	21.9495	115000000	0	71800000	3970000	50200000	4050000					4	4.8	4.8	4.8	96.728	0	6.5106	4	0	4	1	4	1	C4LXU8	798	>tr|C4LXU8|C4LXU8_ENTHI Cysteine protease binding protein family 2 OS=Entamoeba histolytica OX=5759 GN=cpbf2 PE=2 SV=1
C4LT57	Protein kinase, putative	EHI_148900	0.0468841	0.101375	5.19381	28.019	20.5356	28.003	24.3376	28.1507	23.7182	272000000	1520000	269000000	21200000	298000000	13800000					10	27.6	27.6	27.6	54.921	0	20.326	6	1	7	4	8	2	C4LT57	288	>tr|C4LT57|C4LT57_ENTHI Protein kinase, putative OS=Entamoeba histolytica OX=5759 GN=EHI_148900 PE=4 SV=1
C4LYI0	Uncharacterized protein	EHI_093890	0.0798803	0.142711	5.19288	23.1627	19.4046	27.3153	19	24.0691	20.5638	9390000	694000	167000000	0	17600000	1550000	+				3	3	3	3	134.28	1	-2	1	1	2	0	1	1	C4LYI0	861	>tr|C4LYI0|C4LYI0_ENTHI Uncharacterized protein OS=Entamoeba histolytica OX=5759 GN=EHI_093890 PE=4 SV=1
C4LUS5	Uncharacterized protein	EHI_178600	0.0452506	0.0992752	5.19264	26.8019	21.7675	26.2481	19	25.5315	22.2361	117000000	3570000	79700000	0	48500000	4940000					1	5.6	5.6	5.6	24.899	0.0060142	1.5255	1	1	1	0	1	1	C4LUS5	464	>tr|C4LUS5|C4LUS5_ENTHI Uncharacterized protein OS=Entamoeba histolytica OX=5759 GN=EHI_178600 PE=4 SV=1
C4M645	Uncharacterized protein	EHI_179940	0.0167986	0.0659748	5.18906	23.5754	19	25.5492	19	23.4425	19	12500000	0	49100000	0	11400000	0					3	7	7	7	54.251	0	6.9602	1	0	3	0	1	0	C4M645	1598	>tr|C4M645|C4M645_ENTHI Uncharacterized protein OS=Entamoeba histolytica OX=5759 GN=EHI_179940 PE=4 SV=1
C4LWV5	SAC3/GANP family protein	EHI_199100	4.61937e-05	0.0257414	5.18117	24.1871	19	24.239	19	24.1174	19	19100000	0	19800000	0	18200000	0			+	Plus DTT_Minus DTT	1	1.9	1.9	1.9	56.563	0.0012739	2.6731	1	0	1	0	1	0	C4LWV5	693	>tr|C4LWV5|C4LWV5_ENTHI SAC3/GANP family protein OS=Entamoeba histolytica OX=5759 GN=EHI_199100 PE=4 SV=1
C4M5Q2	Uncharacterized protein	EHI_129850	0.00838086	0.0559259	5.18067	24.9088	19	24.3511	19	23.2821	19	31500000	0	21400000	0	10200000	0	+				1	1.7	1.7	1.7	48.405	1	-2	1	0	1	0	1	0	C4M5Q2	1559	>tr|C4M5Q2|C4M5Q2_ENTHI Uncharacterized protein OS=Entamoeba histolytica OX=5759 GN=EHI_129850 PE=4 SV=1
C4M5P2	Uncharacterized protein	EHI_040630	0.0455436	0.0995261	5.17887	28.7453	21.2877	27.4473	23.217	27.341	23.4923	450000000	2560000	183000000	9750000	170000000	11800000					9	10.1	10.1	10.1	107.21	0	16.073	8	1	5	2	7	3	C4M5P2	1557	>tr|C4M5P2|C4M5P2_ENTHI Uncharacterized protein OS=Entamoeba histolytica OX=5759 GN=EHI_040630 PE=3 SV=1
C4LW18;B1N4X5	Uncharacterized protein	EHI_141330;EHI_085720	0.0103254	0.0587806	5.16784	33.3169	27.1015	32.7292	27.9539	32.4556	27.9428	10700000256	144000000	7120000000	260000000	5889999872	258000000					21	51.6	51.6	51.6	51.462	0	309.61	19	9	19	11	20	10	C4LW18;B1N4X5	610	>tr|C4LW18|C4LW18_ENTHI Uncharacterized protein OS=Entamoeba histolytica OX=5759 GN=EHI_141330 PE=4 SV=1;>tr|B1N4X5|B1N4X5_ENTHI Uncharacterized protein OS=Entamoeba histolytica OX=5759 GN=EHI_085720 PE=4 SV=1
C4M9Z8	Uncharacterized protein	EHI_184220	0.0281085	0.078909	5.15887	30.6881	23.9225	28.7421	23.7492	28.4976	24.7796	1730000000	15900000	449000000	14100000	379000000	28800000					18	34.6	34.6	34.6	61.27	0	53.08	18	4	13	5	15	5	C4M9Z8	1931	>tr|C4M9Z8|C4M9Z8_ENTHI Uncharacterized protein OS=Entamoeba histolytica OX=5759 GN=EHI_184220 PE=3 SV=1
C4M3L4	Rho guanine nucleotide exchange factor, putative	EHI_109960	0.0332426	0.0844901	5.14988	26.0752	19	25.2821	21.0426	24.9225	20.7876	70700000	0	40800000	2160000	31800000	1810000					3	4.8	4.8	4.8	66.396	0	4.2482	3	0	1	1	2	1	C4M3L4	1356	>tr|C4M3L4|C4M3L4_ENTHI Rho guanine nucleotide exchange factor, putative OS=Entamoeba histolytica OX=5759 GN=EHI_109960 PE=4 SV=1
C4LUA0	Uncharacterized protein	EHI_110510	0.022648	0.072221	5.14984	30.8755	24.1488	29.6964	25.3273	29.6251	25.2714	1970000000	18600000	870000000	42100000	828000000	40500000					15	35.9	35.9	35.9	52.81	0	72.387	15	2	12	6	11	6	C4LUA0	406	>tr|C4LUA0|C4LUA0_ENTHI Uncharacterized protein OS=Entamoeba histolytica OX=5759 GN=EHI_110510 PE=4 SV=1
C4M7Q3	Uncharacterized protein	EHI_120870	0.0470114	0.101441	5.14546	27.1015	22.1886	26.2553	19	26.1871	22.9189	144000000	4780000	80100000	0	76400000	7930000					4	5.9	5.9	5.9	72.974	0	4.4157	4	1	4	0	3	2	C4M7Q3	1735	>tr|C4M7Q3|C4M7Q3_ENTHI Uncharacterized protein OS=Entamoeba histolytica OX=5759 GN=EHI_120870 PE=4 SV=1
C4LVI6;B1N2Q6	Uncharacterized protein;F-box domain containing protein, putative	EHI_103420;EHI_103710	0.0601257	0.117392	5.14496	26.7389	19	25.5754	22.1704	25.1332	20.8423	112000000	0	50000000	4720000	36800000	1880000					4	12.5	12.5	12.5	47.534	0	14.473	3	0	3	1	2	1	C4LVI6;B1N2Q6	539	>tr|C4LVI6|C4LVI6_ENTHI Uncharacterized protein OS=Entamoeba histolytica OX=5759 GN=EHI_103420 PE=4 SV=1;>tr|B1N2Q6|B1N2Q6_ENTHI F-box domain containing protein, putative OS=Entamoeba histolytica OX=5759 GN=EHI_103710 PE=4 SV=1
C4M5T5	ATPase, AAA family protein	EHI_081930	0.0115758	0.0610696	5.14366	29.6251	23.391	28.5315	24.141	28.249	23.4425	828000000	11000000	388000000	18500000	319000000	11400000					16	18.6	18.6	18.6	106.2	0	28.553	16	6	13	5	13	4	C4M5T5	1569	>tr|C4M5T5|C4M5T5_ENTHI ATPase, AAA family protein OS=Entamoeba histolytica OX=5759 GN=EHI_081930 PE=4 SV=1
C4M1J0	Uncharacterized protein	EHI_001100	0.0366245	0.087611	5.13619	32.0769	24.9271	30.933	26.6458	30.6713	26.6998	4529999872	31900000	2050000000	105000000	1710000000	109000000					22	48.1	48.1	48.1	54.893	0	237.11	22	6	18	14	21	15	C4M1J0	1159	>tr|C4M1J0|C4M1J0_ENTHI Uncharacterized protein OS=Entamoeba histolytica OX=5759 GN=EHI_001100 PE=4 SV=1
C4LVR9	Glyceraldehyde-3-phosphate dehydrogenase	EHI_008200	0.00345409	0.0492489	5.13471	36.9742	31.6066	37.8162	32.3142	37.0572	32.5226	134999998464	3270000128	242000003072	5340000256	142999994368	6169999872			+	Plus DTT_Minus DTT	44	85.3	85.3	85.3	36.013	0	323.31	37	26	42	22	36	24	C4LVR9	574	>tr|C4LVR9|C4LVR9_ENTHI Glyceraldehyde-3-phosphate dehydrogenase OS=Entamoeba histolytica OX=5759 GN=EHI_008200 PE=2 SV=1
C4M030	Rubrerythrin, putative	EHI_134810	0.0132824	0.0621874	5.13027	32.8883	26.5653	31.8196	27.341	31.341	26.7517	7950000128	99300000	3790000128	170000000	2720000000	113000000					14	79.4	79.4	79.4	21.243	0	175.15	14	7	12	8	11	7	C4M030	1021	>tr|C4M030|C4M030_ENTHI Rubrerythrin, putative OS=Entamoeba histolytica OX=5759 GN=EHI_134810 PE=4 SV=1
C4LVZ8	PIG-P domain-containing protein	EHI_126130	0.0618559	0.120206	5.11909	27.0609	22.2961	26.5898	19	26.1155	23.1127	140000000	5150000	101000000	0	72700000	9070000					2	12.1	12.1	12.1	18.864	0	9.3535	2	1	2	0	2	1	C4LVZ8	603	>tr|C4LVZ8|C4LVZ8_ENTHI PIG-P domain-containing protein OS=Entamoeba histolytica OX=5759 GN=EHI_126130 PE=4 SV=1
C4LUH3	Ubiquitin-conjugating enzyme family protein	EHI_049740	0.0660353	0.125484	5.11047	26.3324	22.2679	26.8504	19	26.5667	23.1504	84500000	5050000	121000000	0	99400000	9310000					4	14.2	14.2	14.2	39.844	0	12.319	3	2	4	0	4	3	C4LUH3	430	>tr|C4LUH3|C4LUH3_ENTHI Ubiquitin-conjugating enzyme family protein OS=Entamoeba histolytica OX=5759 GN=EHI_049740 PE=4 SV=1
B1N3J0	Rab family GTPase	EHI_059670	0.0674035	0.127112	5.10859	28.5573	20.8423	27.5898	22.9079	25.8623	22.9334	395000000	1880000	202000000	7870000	61000000	8010000					4	6.1	6.1	6.1	86.286	0	15.001	4	1	3	1	2	1	B1N3J0	78	>tr|B1N3J0|B1N3J0_ENTHI Rab family GTPase OS=Entamoeba histolytica OX=5759 GN=EHI_059670 PE=3 SV=1
C4M247	Ribonuclease, putative	EHI_169300	0.00715054	0.0559259	5.09913	24.8528	19	24.0935	19	23.3511	19	30300000	0	17900000	0	10700000	0	+				1	47.8	3.6	3.6	27.795	1	-2	1	0	1	0	1	0	C4M247	1216	>tr|C4M247|C4M247_ENTHI Ribonuclease, putative OS=Entamoeba histolytica OX=5759 GN=EHI_169300 PE=3 SV=1
C4M5X0	Poly [ADP-ribose] polymerase	EHI_136960	0.00279843	0.0487947	5.09614	24.4425	19	24.2821	19	23.5638	19	22800000	0	20400000	0	12400000	0			+	Plus DTT_Minus DTT	1	1.3	1.3	1.3	102.33	0.0011884	2.1332	1	0	1	0	1	0	C4M5X0	1579	>tr|C4M5X0|C4M5X0_ENTHI Poly [ADP-ribose] polymerase OS=Entamoeba histolytica OX=5759 GN=EHI_136960 PE=4 SV=1
C4LYY8	Molybdenum cofactor synthesis protein3, putative	EHI_118040	0.0275889	0.0788405	5.09541	26.4138	20.3645	26.002	22.632	24.867	19	89400000	1350000	67200000	6500000	30600000	0					2	10	10	10	26.968	0	3.6917	2	1	2	1	1	0	C4LYY8	909	>tr|C4LYY8|C4LYY8_ENTHI Molybdenum cofactor synthesis protein3, putative OS=Entamoeba histolytica OX=5759 GN=EHI_118040 PE=4 SV=1
C4M7C8	Beta-hexosaminidase	EHI_007330	0.00351305	0.0492489	5.09441	33.8792	28.3153	33.1223	27.9316	32.6985	28.17	15800000512	334000000	9349999616	256000000	6969999872	302000000			+	Plus DTT_Minus DTT	27	45.5	45.5	45.5	64.371	0	198.81	25	15	26	14	24	14	C4M7C8	1706	>tr|C4M7C8|C4M7C8_ENTHI Beta-hexosaminidase OS=Entamoeba histolytica OX=5759 GN=EHI_007330 PE=3 SV=1
C4LVL7	Nucleosome assembly protein, putative	EHI_103750	0.00218038	0.0487947	5.09348	23.7077	19	24.0443	19	24.5285	19	13700000	0	17300000	0	24200000	0			+	Plus DTT_Minus DTT	3	10.5	10.5	10.5	34.552	0	9.1524	1	0	2	0	2	0	C4LVL7	551	>tr|C4LVL7|C4LVL7_ENTHI Nucleosome assembly protein, putative OS=Entamoeba histolytica OX=5759 GN=EHI_103750 PE=3 SV=1
C4LWL5	Uncharacterized protein	EHI_069270	0.0469352	0.101375	5.08893	26.976	22.1976	26.2058	19	26.4877	23.2051	132000000	4810000	77400000	0	94100000	9670000					6	13.6	13.6	13.6	57.066	0	10.902	4	2	4	0	6	2	C4LWL5	668	>tr|C4LWL5|C4LWL5_ENTHI Uncharacterized protein OS=Entamoeba histolytica OX=5759 GN=EHI_069270 PE=4 SV=1
C4M1N4	Uncharacterized protein	EHI_062470	0.00811201	0.0559259	5.08593	24.8288	19	24.1871	19	23.2419	19	29800000	0	19100000	0	9920000	0					1	3.8	3.8	3.8	40.945	0	3.8746	1	0	1	0	1	0	C4M1N4	1175	>tr|C4M1N4|C4M1N4_ENTHI Uncharacterized protein OS=Entamoeba histolytica OX=5759 GN=EHI_062470 PE=4 SV=1
Q5NT41	Rab family GTPase (Fragment)	EhRabC3	0.0137724	0.0625652	5.07702	32.2952	26.019	31.362	26.7895	31.0283	26.6458	5270000128	68000000	2760000000	116000000	2190000128	105000000					15	78.8	78.8	75	22.631	0	125.51	15	5	15	10	14	6	Q5NT41	2268	>tr|Q5NT41|Q5NT41_ENTHI Rab family GTPase (Fragment) OS=Entamoeba histolytica OX=5759 GN=EhRabC3 PE=3 SV=1
C4LWT4	Proliferating-cell nucleolar antigen p120, putative	EHI_198880	0.0680028	0.127699	5.07484	27.9595	21.8113	25.7695	19	25.7619	23.4551	261000000	3680000	57200000	0	56900000	11500000					6	15.8	15.8	15.8	55.483	0	14.671	5	1	2	0	2	2	C4LWT4	688	>tr|C4LWT4|C4LWT4_ENTHI Proliferating-cell nucleolar antigen p120, putative OS=Entamoeba histolytica OX=5759 GN=EHI_198880 PE=3 SV=1
C4LZ28	Alpha-1,2-mannosidase, putative	EHI_009520	0.0781818	0.140652	5.07461	26.1293	19	25.8741	19.9127	24.1488	22.0156	73400000	0	61500000	987000	18600000	4240000					5	6.5	6.5	6.5	85.256	0	4.3471	3	0	4	1	1	1	C4LZ28	921	>tr|C4LZ28|C4LZ28_ENTHI Alpha-1,2-mannosidase, putative OS=Entamoeba histolytica OX=5759 GN=EHI_009520 PE=4 SV=1
C4M1S2	Ubiquitin-conjugating enzyme family protein	EHI_164400	0.00756286	0.0559259	5.07102	29.5071	23.5983	29.249	24.3444	29.1386	24.7389	763000000	12700000	638000000	21300000	591000000	28000000					3	24.7	24.7	24.7	16.989	0	13.464	3	2	3	3	3	3	C4M1S2	1182	>tr|C4M1S2|C4M1S2_ENTHI Ubiquitin-conjugating enzyme family protein OS=Entamoeba histolytica OX=5759 GN=EHI_164400 PE=3 SV=1
B1N5Z9	AIG1 family protein, putative	EHI_157360	0.00229931	0.0487947	5.07032	24.4105	19	24.2021	19	23.5983	19	22300000	0	19300000	0	12700000	0			+	Plus DTT_Minus DTT	1	15.8	4.6	4.6	32.961	0	5.2271	1	0	1	0	1	0	B1N5Z9	176	>tr|B1N5Z9|B1N5Z9_ENTHI AIG1 family protein, putative OS=Entamoeba histolytica OX=5759 GN=EHI_157360 PE=4 SV=1
C4M3P6	Uncharacterized protein	EHI_140740	0.038034	0.0884945	5.06904	34.933	27.8324	33.4334	29.267	32.9188	28.9787	32800000000	239000000	11600000000	646000000	8120000000	529000000					42	75.3	75.3	73.5	52.309	0	323.31	41	15	36	23	38	18	C4M3P6	1371	>tr|C4M3P6|C4M3P6_ENTHI Uncharacterized protein OS=Entamoeba histolytica OX=5759 GN=EHI_140740 PE=4 SV=1
C4M6Z0	Uncharacterized protein	EHI_056400	0.0111732	0.0602737	5.06652	29.267	23.1222	28.6764	24.0935	28.1795	23.7077	646000000	9130000	429000000	17900000	304000000	13700000					4	8.7	8.7	8.7	53.22	0	17.519	4	1	3	2	3	1	C4M6Z0;B1N4M0	1661	>tr|C4M6Z0|C4M6Z0_ENTHI Uncharacterized protein OS=Entamoeba histolytica OX=5759 GN=EHI_056400 PE=4 SV=1
C4MA86	Uncharacterized protein	EHI_039820	0.0322774	0.0830624	5.0654	28.9316	22.4196	28.3745	23.0122	27.8741	24.5522	512000000	5610000	348000000	8460000	246000000	24600000					9	13.3	13.3	13.3	57.144	0	34.346	6	2	8	1	8	4	C4MA86	1949	>tr|C4MA86|C4MA86_ENTHI Uncharacterized protein OS=Entamoeba histolytica OX=5759 GN=EHI_039820 PE=4 SV=1
C4M4K4	DNA repair protein RAD51 homolog	EHI_031220	0.120321	0.192947	5.06465	27.8081	19	27.3324	23.2821	26.673	24.3376	235000000	0	169000000	10200000	107000000	21200000					3	12.8	12.8	12.8	40.311	0	19.851	3	0	3	1	3	1	C4M4K4	1464	>tr|C4M4K4|C4M4K4_ENTHI DNA repair protein RAD51 homolog OS=Entamoeba histolytica OX=5759 GN=EHI_031220 PE=3 SV=1
C4M2T6	rRNA biogenesis protein RRP5, putative	EHI_077270	0.0952533	0.161706	5.0502	28.579	20.1825	26.4831	23.391	26.7129	23.0509	401000000	1190000	93800000	11000000	110000000	8690000					3	1.6	1.6	1.6	198.25	0	3.6698	3	1	3	2	3	2	C4M2T6	1284	>tr|C4M2T6|C4M2T6_ENTHI rRNA biogenesis protein RRP5, putative OS=Entamoeba histolytica OX=5759 GN=EHI_077270 PE=4 SV=1
C4M3M3	Ubiquitin carboxyl-terminal hydrolase	EHI_140500	0.184232	0.265083	5.04401	19	19	26.8858	19	26.2463	19	0	0	124000000	0	79600000	0					3	10	10	10	36.05	0	3.6002	0	0	3	0	2	0	C4M3M3	1361	>tr|C4M3M3|C4M3M3_ENTHI Ubiquitin carboxyl-terminal hydrolase OS=Entamoeba histolytica OX=5759 GN=EHI_140500 PE=3 SV=1
C4M875	DH domain-containing protein	EHI_098820	0.00654798	0.0548842	5.04086	24.002	19	24.7695	19	23.3511	19	16800000	0	28600000	0	10700000	0					1	1.3	1.3	1.3	111.84	0	5.0139	1	0	1	0	1	0	C4M875	1770	>tr|C4M875|C4M875_ENTHI DH domain-containing protein OS=Entamoeba histolytica OX=5759 GN=EHI_098820 PE=4 SV=1
C4LVJ6	Uncharacterized protein	EHI_103520	0.0292629	0.0796902	5.04037	26.8142	21.4324	25.3679	19	25.6703	22.2989	118000000	2830000	43300000	0	53400000	5160000					1	4.2	4.2	4.2	30.424	0.001265	2.6288	1	1	1	0	1	1	C4LVJ6	544	>tr|C4LVJ6|C4LVJ6_ENTHI Uncharacterized protein OS=Entamoeba histolytica OX=5759 GN=EHI_103520 PE=4 SV=1
C4M1M5	Uncharacterized protein	EHI_133960	0.00424966	0.0515364	5.03537	24.0275	19	24.6096	19	25.5315	21.0625	17100000	0	25600000	0	48500000	2190000					6	3.4	3.4	3.4	179.68	0	6.2662	2	0	3	0	4	1	C4M1M5	1170	>tr|C4M1M5|C4M1M5_ENTHI Uncharacterized protein OS=Entamoeba histolytica OX=5759 GN=EHI_133960 PE=4 SV=1
C4M987	Protein kinase domain containing protein	EHI_119930	0.00264145	0.0487947	5.01523	30.7292	25.228	30.7849	26.1642	30.8755	25.9517	1780000000	39300000	1850000000	75200000	1970000000	64900000			+	Plus DTT_Minus DTT	2	2.4	2.4	2.4	78.105	0	4.0988	1	1	1	2	1	2	C4M987	1875	>tr|C4M987|C4M987_ENTHI Protein kinase domain containing protein OS=Entamoeba histolytica OX=5759 GN=EHI_119930 PE=4 SV=1
CON__Q2UVX4			0.0162831	0.0656574	4.50389	30.9746	25.5433	29.8697	25.2207	29.5389	26.1075	2110000000	48900000	981000000	39100000	780000000	72300000		+			29	18.8	18.8	18.8	187.37	0	100.45	27	10	21	9	20	10	CON__Q2UVX4	2111	>Q2UVX4 SWISS-PROT:Q2UVX4 (Bos taurus) Complement C3 precursor
C4LUH2	Uncharacterized protein	EHI_049730	0.183899	0.265083	5.01186	19	19	26.7517	19	26.2838	19	0	0	113000000	0	81700000	0					1	2.4	2.4	2.4	43.854	0.0039932	1.8191	0	0	1	0	1	0	C4LUH2	429	>tr|C4LUH2|C4LUH2_ENTHI Uncharacterized protein OS=Entamoeba histolytica OX=5759 GN=EHI_049730 PE=4 SV=1
C4LW08	Uncharacterized protein	EHI_126230	0.047194	0.101487	5.01082	28.2077	21.1269	27.2803	24.0854	27.391	22.6342	310000000	2290000	163000000	17800000	176000000	6510000					6	9.1	9.1	9.1	112.98	0	25.36	5	1	3	4	5	2	C4LW08	605	>tr|C4LW08|C4LW08_ENTHI Uncharacterized protein OS=Entamoeba histolytica OX=5759 GN=EHI_126230 PE=4 SV=1
C4M5V0	Thioredoxin, putative	EHI_026340	0.0111723	0.0602737	4.99848	33.8516	27.7895	32.9028	28.4938	32.5435	28.019	15500000256	232000000	8030000128	378000000	6259999744	272000000					11	77.2	77.2	68.5	14.478	0	141.82	11	5	10	7	11	5	C4M5V0	1571	>tr|C4M5V0|C4M5V0_ENTHI Thioredoxin, putative OS=Entamoeba histolytica OX=5759 GN=EHI_026340 PE=3 SV=1
C4MBF5	Uncharacterized protein	EHI_161640	0.0099767	0.0586756	4.98604	31.8157	25.9088	31.2703	26.3992	30.4919	26.3118	3780000000	63000000	2590000128	88500000	1510000000	83300000					9	21.6	21.6	21.6	38.804	0	71.88	8	5	8	6	7	4	C4MBF5	2025	>tr|C4MBF5|C4MBF5_ENTHI Uncharacterized protein OS=Entamoeba histolytica OX=5759 GN=EHI_161640 PE=4 SV=1
CON__ENSEMBL:ENSBTAP00000014147			0.0165524	0.065918	5.5618	30.9188	25.8142	30.2535	25.654	29.9677	22.9864	2030000000	59000000	1280000000	52800000	1050000000	8310000		+			4	45.1	45.1	45.1	11.756	0	11.998	4	2	4	3	4	2	CON__ENSEMBL:ENSBTAP00000014147	2047	>ENSEMBL:ENSBTAP00000014147 (Bos taurus) 12 kDa protein
C4M0F2	Uncharacterized protein	EHI_006790	0.105899	0.174851	4.985	27.3066	19	26.9539	22.5915	26.0041	23.7182	166000000	0	130000000	6320000	67300000	13800000	+				1	8.6	8.6	8.6	15.255	1	-2	1	0	1	1	1	1	C4M0F2	1054	>tr|C4M0F2|C4M0F2_ENTHI Uncharacterized protein OS=Entamoeba histolytica OX=5759 GN=EHI_006790 PE=4 SV=1
C4LSK1;B1N3F1	Helicase, putative;ATP-dependent RNA helicase DDX39, putative	EHI_151600;EHI_150160	0.0235653	0.0731721	4.98025	31.8719	25.5045	31.341	26.4425	29.6355	25.9606	3929999872	47600000	2720000000	91200000	834000000	65300000					23	55.1	55.1	52.5	47.289	0	98.604	21	8	22	11	15	7	C4LSK1;B1N3F1	221	>tr|C4LSK1|C4LSK1_ENTHI Helicase, putative OS=Entamoeba histolytica OX=5759 GN=EHI_151600 PE=4 SV=1;>tr|B1N3F1|B1N3F1_ENTHI ATP-dependent RNA helicase DDX39, putative OS=Entamoeba histolytica OX=5759 GN=EHI_150160 PE=4 SV=1
C4M1V6	Molybdopterin cofactor sulfurase, putative	EHI_027700	0.0456082	0.0995697	4.97907	26.1661	19	23.1127	19	22.6584	19	75300000	0	9070000	0	6620000	0					2	4.7	4.7	4.7	53.372	0.005534	1.6276	2	0	1	0	1	0	C4M1V6	1193	>tr|C4M1V6|C4M1V6_ENTHI Molybdopterin cofactor sulfurase, putative OS=Entamoeba histolytica OX=5759 GN=EHI_027700 PE=4 SV=1
C4M275	Protein tyrosine kinase domain-containing protein	EHI_180150	0.00330231	0.0492489	4.97857	24.5522	19	23.6865	19	23.6971	19	24600000	0	13500000	0	13600000	0	+		+	Plus DTT_Minus DTT	1	9.5	0.8	0.8	135.14	1	-2	1	0	1	0	1	0	C4M275	1222	>tr|C4M275|C4M275_ENTHI Protein tyrosine kinase domain-containing protein OS=Entamoeba histolytica OX=5759 GN=EHI_180150 PE=4 SV=1
C4M2E1	Uncharacterized protein	EHI_158220	0.0187343	0.0675707	4.97377	28.4073	23.0999	28.2123	22.2448	27.1015	23.4551	356000000	8990000	311000000	4970000	144000000	11500000					9	24.5	24.5	24.5	42.193	0	33.724	8	3	8	1	8	3	C4M2E1	1238	>tr|C4M2E1|C4M2E1_ENTHI Uncharacterized protein OS=Entamoeba histolytica OX=5759 GN=EHI_158220 PE=4 SV=1
C4LZB2	Nucleotide binding protein 2, putative	EHI_000610	0.00104625	0.0487947	4.97317	31.5889	26.6998	31.9574	26.673	31.7965	27.0505	3230000128	109000000	4169999872	107000000	3729999872	139000000			+	Plus DTT_Minus DTT	12	53.8	53.8	53.8	29.287	0	106.28	12	8	12	8	12	7	C4LZB2	946	>tr|C4LZB2|C4LZB2_ENTHI Nucleotide binding protein 2, putative OS=Entamoeba histolytica OX=5759 GN=EHI_000610 PE=3 SV=1
C4LV26	Uncharacterized protein	EHI_092660	0.0599381	0.117195	4.97162	29.7373	22.2332	28.3109	24.3444	27.8019	24.3578	895000000	4930000	333000000	21300000	234000000	21500000					11	10.5	10.5	10.5	128.81	0	28.299	11	2	8	5	8	6	C4LV26	492	>tr|C4LV26|C4LV26_ENTHI Uncharacterized protein OS=Entamoeba histolytica OX=5759 GN=EHI_092660 PE=3 SV=1
C4LUF8	RhoGAP domain containing protein	EHI_049570	0.0317309	0.0825297	4.96537	25.0062	21.6843	25.4488	19	24.1253	19	33700000	3370000	45800000	0	18300000	0					4	6.2	6.2	6.2	73.397	0	4.1931	2	1	3	0	3	0	C4LUF8	424	>tr|C4LUF8|C4LUF8_ENTHI RhoGAP domain containing protein OS=Entamoeba histolytica OX=5759 GN=EHI_049570 PE=4 SV=1
C4LTU2	Paxillin, putative	EHI_050720	0.104562	0.17326	4.95853	27.2979	19	26.0588	21.9024	25.2463	22.8249	165000000	0	69900000	3920000	39800000	7430000					3	15.9	15.9	15.9	28.603	0	20.648	3	0	2	1	2	2	C4LTU2	353	>tr|C4LTU2|C4LTU2_ENTHI Paxillin, putative OS=Entamoeba histolytica OX=5759 GN=EHI_050720 PE=4 SV=1
Q4EW66	Protein tyrosine phosphatase A	EHI_049430	0.0221905	0.0720267	4.95752	29.8667	25.5869	28.9787	24.8433	29.3431	22.8858	979000000	50400000	529000000	30100000	681000000	7750000					11	30.6	30.6	30.6	40.737	0	40.017	10	3	9	4	9	2	Q4EW66	2191	>tr|Q4EW66|Q4EW66_ENTHI Protein tyrosine phosphatase A OS=Entamoeba histolytica OX=5759 GN=EHI_049430 PE=4 SV=1
C4LZX1	Molybdenum cofactor sulfurase putative	EHI_194600	0.0250229	0.0754062	4.95454	35.4365	28.9174	34.1901	30.2979	33.9763	29.524	46499999744	507000000	19599998976	1320000000	16899999744	772000000					36	64.8	64.8	63.5	60.486	0	323.31	35	18	34	20	31	20	C4LZX1	1000	>tr|C4LZX1|C4LZX1_ENTHI Molybdenum cofactor sulfurase putative OS=Entamoeba histolytica OX=5759 GN=EHI_194600 PE=4 SV=1
C4LSX5	Uncharacterized protein	EHI_148050	0.0227536	0.0724538	4.94953	30.846	24.3844	30.1115	26.0464	29.9814	25.6595	1930000000	21900000	1160000000	69300000	1060000000	53000000					8	26.2	26.2	26.2	43.937	0	67.135	8	2	6	4	8	6	C4LSX5	258	>tr|C4LSX5|C4LSX5_ENTHI Uncharacterized protein OS=Entamoeba histolytica OX=5759 GN=EHI_148050 PE=2 SV=1
C4M2Q3	Uncharacterized protein	EHI_160850	0.106521	0.175747	4.94715	26.8741	19	24.632	22.8365	24.1719	19	123000000	0	26000000	7490000	18900000	0					2	4.2	4.2	4.2	57.817	0	2.9207	2	0	1	1	1	0	C4M2Q3	1271	>tr|C4M2Q3|C4M2Q3_ENTHI Uncharacterized protein OS=Entamoeba histolytica OX=5759 GN=EHI_160850 PE=4 SV=1
C4LWP4	Uncharacterized protein	EHI_069560	0.0144952	0.0633124	4.93996	33.8516	27.8799	33.5527	28.5933	32.7393	28.8504	15500000256	247000000	12600000512	405000000	7169999872	484000000					15	49.3	49.3	49.3	22.832	0	86.77	13	9	13	8	13	7	C4LWP4	676	>tr|C4LWP4|C4LWP4_ENTHI Uncharacterized protein OS=Entamoeba histolytica OX=5759 GN=EHI_069560 PE=2 SV=1
C4M3E8	Uncharacterized protein	EHI_095930	0.111255	0.18222	4.92986	26.1155	19	25.3101	19	25.3135	23.9495	72700000	0	41600000	0	41700000	16200000					2	2.6	2.6	2.6	79.604	0	4.0577	2	0	2	0	2	1	C4M3E8	1340	>tr|C4M3E8|C4M3E8_ENTHI Uncharacterized protein OS=Entamoeba histolytica OX=5759 GN=EHI_095930 PE=4 SV=1
C4LWD9	Uncharacterized protein	EHI_096260	0.0387404	0.0897633	4.92611	25.4041	19	24.3511	19	25.0148	21.9916	44400000	0	21400000	0	33900000	4170000					2	3.8	3.8	3.8	48.471	0.0012019	2.1908	2	0	1	0	2	1	C4LWD9	645	>tr|C4LWD9|C4LWD9_ENTHI Uncharacterized protein OS=Entamoeba histolytica OX=5759 GN=EHI_096260 PE=4 SV=1
B1N2K5	Uncharacterized protein	EHI_110460	0.0584858	0.115674	4.92189	29.2308	24.0772	28.0557	21.1015	28.141	25.4831	630000000	17700000	279000000	2250000	296000000	46900000					6	37.2	37.2	37.2	16.504	0	13.222	5	2	5	1	4	4	B1N2K5	18	>tr|B1N2K5|B1N2K5_ENTHI Uncharacterized protein OS=Entamoeba histolytica OX=5759 GN=EHI_110460 PE=4 SV=1
C4M4K5	Uncharacterized protein	EHI_031230	0.0354162	0.0867502	4.91609	26.5404	22.9566	26.3101	21.9024	25.7568	19	97600000	8140000	83200000	3920000	56700000	0					3	6.8	6.8	6.8	56.003	0	5.4324	2	1	3	1	1	0	C4M4K5	1465	>tr|C4M4K5|C4M4K5_ENTHI Uncharacterized protein OS=Entamoeba histolytica OX=5759 GN=EHI_031230 PE=4 SV=1
C4LUR7	Uncharacterized protein	EHI_178510	0.0702483	0.130269	4.91374	26.5653	19	25.7517	21.5261	25.1449	22.1946	99300000	0	56500000	3020000	37100000	4800000					2	3.2	3.2	3.2	82.921	0	3.367	2	0	1	1	1	1	C4LUR7	462	>tr|C4LUR7|C4LUR7_ENTHI Uncharacterized protein OS=Entamoeba histolytica OX=5759 GN=EHI_178510 PE=4 SV=1
C4M758	Alpha-NAC protein, putative	EHI_083250	0.036711	0.087611	4.9089	34.2828	27.4394	32.4895	28.5203	32.2336	28.3196	20899999744	182000000	6030000128	385000000	5049999872	335000000					21	76.3	76.3	73.1	24.341	0	201.53	21	9	18	12	18	11	C4M758	1686	>tr|C4M758|C4M758_ENTHI Alpha-NAC protein, putative OS=Entamoeba histolytica OX=5759 GN=EHI_083250 PE=2 SV=1
C4M6N0	Uncharacterized protein	EHI_161870	0.0815731	0.144422	4.9072	27.3662	22.969	26.7129	19	26.1984	23.5869	173000000	8210000	110000000	0	77000000	12600000					3	9.5	9.5	9.5	46.581	0	57.521	3	1	2	0	3	1	C4M6N0	1640	>tr|C4M6N0|C4M6N0_ENTHI Uncharacterized protein OS=Entamoeba histolytica OX=5759 GN=EHI_161870 PE=4 SV=1
C4LZV6	Uncharacterized protein	EHI_194430	0.0171681	0.0662072	4.8983	29.3303	23.1316	27.7064	23.4676	27.5536	23.2961	675000000	9190000	219000000	11600000	197000000	10300000					9	34.9	34.9	34.9	21.192	0	23.169	9	1	6	2	6	1	C4LZV6	992	>tr|C4LZV6|C4LZV6_ENTHI Uncharacterized protein OS=Entamoeba histolytica OX=5759 GN=EHI_194430 PE=4 SV=1
C4M2N1	Uncharacterized protein	EHI_005960	0.0690187	0.128802	4.89803	26.4298	23.5045	26.5014	19	26.7645	22.4972	90400000	11900000	95000000	0	114000000	5920000					3	25.9	25.9	25.9	15.207	0	7.5678	2	2	3	0	3	1	C4M2N1	1262	>tr|C4M2N1|C4M2N1_ENTHI Uncharacterized protein OS=Entamoeba histolytica OX=5759 GN=EHI_005960 PE=4 SV=1
C4M5W1	synthase, putative	EHI_026480	0.000422016	0.0487947	4.89786	29.4154	24.6757	29.249	24.1642	28.7549	23.8858	716000000	26800000	638000000	18800000	453000000	15500000			+	Plus DTT_Minus DTT	8	30.9	30.9	30.9	29.179	0	19.655	7	3	7	2	7	2	C4M5W1	1575	>tr|C4M5W1|C4M5W1_ENTHI (2r)-phospho-3-sulfolactate synthase, putative OS=Entamoeba histolytica OX=5759 GN=EHI_026480 PE=3 SV=1
C4LTJ5	Beta-hexosaminidase	EHI_012010	0.0318797	0.0825318	4.89678	30.2759	24.002	29.2535	24.0526	28.5933	25.3778	1300000000	16800000	640000000	17400000	405000000	43600000					11	23.6	23.6	23.6	64.39	0	29.72	11	2	11	2	10	3	C4LTJ5	321	>tr|C4LTJ5|C4LTJ5_ENTHI Beta-hexosaminidase OS=Entamoeba histolytica OX=5759 GN=EHI_012010 PE=3 SV=1
C4LW95;B1N4N8	Thioredoxin reductase;Disulphide oxidoreductase, putative	EHI_155440;EHI_024110	0.00200696	0.0487947	4.89397	31.9643	27.5014	33.3568	28.1747	33.3436	28.3066	4190000128	190000000	11000000512	303000000	10899999744	332000000			+	Plus DTT_Minus DTT	13	55.1	55.1	55.1	33.741	0	222.41	11	9	13	11	13	9	C4LW95;B1N4N8	630	>tr|C4LW95|C4LW95_ENTHI Thioredoxin reductase OS=Entamoeba histolytica OX=5759 GN=EHI_155440 PE=1 SV=1;>tr|B1N4N8|B1N4N8_ENTHI Disulphide oxidoreductase, putative OS=Entamoeba histolytica OX=5759 GN=EHI_024110 PE=4 SV=1
C4M9Y5	Rho guanine nucleotide exchange factor, putative	EHI_131540	0.0532826	0.109261	4.89169	25.1253	19	25.0105	19	24.9716	22.4324	36600000	0	33800000	0	32900000	5660000					4	7.7	7.7	7.7	64.252	0	3.6675	3	0	2	0	3	2	C4M9Y5	1929	>tr|C4M9Y5|C4M9Y5_ENTHI Rho guanine nucleotide exchange factor, putative OS=Entamoeba histolytica OX=5759 GN=EHI_131540 PE=4 SV=1
B1N5N9;C4M7X3;C4M8W8;C4MAG1;B1N5D5;C4MAA7;C4M9V8	Uncharacterized protein (Fragment);Leucine rich repeat protein, BspA family	EHI_102700;EHI_047820	0.00908262	0.0559259	4.88965	24.824	19	25.0148	20.5165	25.0691	20.7223	29700000	0	33900000	1500000	35200000	1730000					1	19.5	7.7	0	20.209	0	3.1817	1	0	1	1	1	1	B1N5N9;C4M7X3;C4M8W8;C4MAG1;B1N5D5;C4MAA7;C4M9V8	174	>tr|B1N5N9|B1N5N9_ENTHI Uncharacterized protein (Fragment) OS=Entamoeba histolytica OX=5759 GN=EHI_102700 PE=4 SV=1;>tr|C4M7X3|C4M7X3_ENTHI Leucine rich repeat protein, BspA family OS=Entamoeba histolytica OX=5759 GN=EHI_047820 PE=4 SV=1;>tr|C4M8W8|C4M8W8_
C4M482	tRNA-dihydrouridine(47) synthase [NAD(P)(+)]	EHI_140340	0.0785406	0.141069	4.88498	26.4202	19	25.2856	22.9098	25.4953	20.6364	89800000	0	40900000	7880000	47300000	1630000					3	5.8	5.8	5.8	59.291	0.001233	2.3992	2	0	2	1	3	1	C4M482	1429	>tr|C4M482|C4M482_ENTHI tRNA-dihydrouridine(47) synthase [NAD(P)(+)] OS=Entamoeba histolytica OX=5759 GN=EHI_140340 PE=3 SV=1
B1N2Z1	Uncharacterized protein	EHI_035730	0.0140341	0.062705	4.87704	31.4871	25.6237	30.5573	25.632	29.9677	26.1253	3009999872	51700000	1580000000	52000000	1050000000	73200000					23	36.1	36.1	36.1	78.926	0	78.605	22	10	22	7	16	9	B1N2Z1	41	>tr|B1N2Z1|B1N2Z1_ENTHI Uncharacterized protein OS=Entamoeba histolytica OX=5759 GN=EHI_035730 PE=4 SV=1
CON__Q28065			0.0175486	0.0664316	3.28493	31.5481	27.8916	31.3672	27.5754	30.6372	28.2308	3140000000	249000000	2769999872	200000000	1670000000	315000000		+			21	36.1	36.1	36.1	68.886	0	98.404	19	17	20	13	16	15	CON__Q28065	2105	>Q28065 SWISS-PROT:Q28065 (Bos taurus) C4b-binding protein alpha chain precursor
C4LWT5	HEAT repeat-containing protein 1	EHI_198890	0.0876672	0.152307	4.8745	26.6998	19	25.2926	20.7389	25.8623	23.4923	109000000	0	41100000	1750000	61000000	11800000					5	2.7	2.7	2.7	229.43	0	14.19	3	0	3	1	4	3	C4LWT5	689	>tr|C4LWT5|C4LWT5_ENTHI HEAT repeat-containing protein 1 OS=Entamoeba histolytica OX=5759 GN=EHI_198890 PE=3 SV=1
C4M3E3	DNA-directed RNA polymerase subunit beta	EHI_095860	0.015996	0.0652139	4.86975	27.3662	21.391	26.604	21.7876	25.7492	21.9316	173000000	2750000	102000000	3620000	56400000	4000000					3	3.8	3.8	3.8	126.93	0.0012225	2.3191	2	1	2	1	2	1	C4M3E3	1338	>tr|C4M3E3|C4M3E3_ENTHI DNA-directed RNA polymerase subunit beta OS=Entamoeba histolytica OX=5759 GN=EHI_095860 PE=3 SV=1
C4M1M6	Thioredoxin, putative	EHI_133970	0.018885	0.0677852	4.86888	34.8469	28.6216	33.5412	29.3044	33.3169	29.1724	30900000768	413000000	12499999744	663000000	10700000256	605000000					32	73.5	73.5	73.5	40.112	0	323.31	30	16	30	18	28	16	C4M1M6	1171	>tr|C4M1M6|C4M1M6_ENTHI Thioredoxin, putative OS=Entamoeba histolytica OX=5759 GN=EHI_133970 PE=4 SV=1
Q8I8D3	Cysteine protease 15	CP15	0.0754539	0.136626	4.85347	27.3239	22.8651	26.4769	19	26.4536	23.8288	168000000	7640000	93400000	0	91900000	14900000	+				1	2.2	2.2	2.2	36.254	1	-2	1	1	1	0	1	1	Q8I8D3	2289	>tr|Q8I8D3|Q8I8D3_ENTHI Cysteine protease 15 OS=Entamoeba histolytica OX=5759 GN=CP15 PE=3 SV=1
C4LY07	Ras GTPase activating protein, putative	EHI_035800	0.0213491	0.0706041	4.85195	34.099	27.8142	33.1161	28.8474	32.9729	28.9705	18400000000	236000000	9310000128	483000000	8430000128	526000000					48	52.2	52.2	52.2	90.364	0	323.31	46	21	46	23	44	23	C4LY07	813	>tr|C4LY07|C4LY07_ENTHI Ras GTPase activating protein, putative OS=Entamoeba histolytica OX=5759 GN=EHI_035800 PE=4 SV=1
C4M576	LIM zinc finger domain containing protein	EHI_111780	0.024864	0.0753955	4.85181	25.3307	19	23.5404	19	22.6843	19	42200000	0	12200000	0	6740000	0					1	3.6	3.6	3.6	30.754	0.0074508	1.3795	1	0	1	0	1	0	C4M576	1519	>tr|C4M576|C4M576_ENTHI LIM zinc finger domain containing protein OS=Entamoeba histolytica OX=5759 GN=EHI_111780 PE=4 SV=1
C4M4H5	Uncharacterized protein	EHI_042210	0.0413832	0.093743	4.84551	27.3153	20.9171	25.4073	22.4775	25.9225	20.714	167000000	1980000	44500000	5840000	63600000	1720000					6	3.8	3.8	3.8	193.88	0	14.597	5	1	4	1	4	1	C4M4H5	1456	>tr|C4M4H5|C4M4H5_ENTHI Uncharacterized protein OS=Entamoeba histolytica OX=5759 GN=EHI_042210 PE=4 SV=1
C4M0I7	Protein tyrosine phosphatase, putative	EHI_024450	0.0081599	0.0559259	4.84317	24.1332	20.1581	27.1015	21.6971	25.7415	20.5915	18400000	1170000	144000000	3400000	56100000	1580000					5	17	17	14.6	39.796	0	9.0383	1	1	4	1	2	1	C4M0I7	1066	>tr|C4M0I7|C4M0I7_ENTHI Protein tyrosine phosphatase, putative OS=Entamoeba histolytica OX=5759 GN=EHI_024450 PE=2 SV=1
C4LX05	60S ribosomal protein L17, putative	EHI_127330	0.00251124	0.0487947	4.84056	30.8682	25.5812	31.4967	26.7129	31.5014	27.0505	1960000000	50200000	3030000128	110000000	3040000000	139000000			+	Plus DTT_Minus DTT	9	35.2	35.2	5.6	19.85	0	88.895	7	2	9	4	8	4	C4LX05	715	>tr|C4LX05|C4LX05_ENTHI 60S ribosomal protein L17, putative OS=Entamoeba histolytica OX=5759 GN=EHI_127330 PE=2 SV=1
C4M2G9	Prolyl-tRNA synthetase	EHI_040400	0.0129027	0.0620854	4.83757	31.0283	25.1833	30.5014	25.7645	30.1842	26.2535	2190000128	38100000	1520000000	57000000	1220000000	80000000					23	49.1	49.1	49.1	61.131	0	150.77	20	6	18	6	20	7	C4M2G9	1245	>tr|C4M2G9|C4M2G9_ENTHI Prolyl-tRNA synthetase OS=Entamoeba histolytica OX=5759 GN=EHI_040400 PE=3 SV=1
C4M930	HEAT repeat domain containing protein	EHI_097470	0.0128103	0.0620854	4.83254	31.5664	25.6375	30.8004	26.3992	30.4532	26.2856	3180000000	52200000	1870000000	88500000	1470000000	81800000					24	27.5	27.5	27.5	118.06	0	108.33	22	5	20	10	19	8	C4M930	1856	>tr|C4M930|C4M930_ENTHI HEAT repeat domain containing protein OS=Entamoeba histolytica OX=5759 GN=EHI_097470 PE=4 SV=1
C4LXI9	Actin, putative	EHI_131230	0.186553	0.265083	4.83072	26.8741	19	25.6181	19	19	19	123000000	0	51500000	0	0	0	+				1	4	0.8	0.8	97.01	1	-2	1	0	1	0	0	0	C4LXI9	772	>tr|C4LXI9|C4LXI9_ENTHI Actin, putative OS=Entamoeba histolytica OX=5759 GN=EHI_131230 PE=3 SV=1
C4LTI2	Proteasome endopeptidase complex	EHI_011870	0.0049593	0.0515942	4.82463	27.3066	22.8913	27.4629	22.9061	26.2571	20.7553	166000000	7780000	185000000	7860000	80200000	1770000					3	13.9	13.9	13.9	28.403	0	13.088	3	1	3	1	3	1	C4LTI2	315	>tr|C4LTI2|C4LTI2_ENTHI Proteasome endopeptidase complex OS=Entamoeba histolytica OX=5759 GN=EHI_011870 PE=2 SV=1
C4M938	60S ribosomal protein L7, putative	EHI_025830	0.0222884	0.0720267	4.82007	30.3515	24.0772	28.7958	24.558	28.7227	24.7745	1370000000	17700000	466000000	24700000	443000000	28700000					3	63.9	16.5	9.6	25.715	0	27.092	3	1	3	1	3	1	C4M938	1860	>tr|C4M938|C4M938_ENTHI 60S ribosomal protein L7, putative OS=Entamoeba histolytica OX=5759 GN=EHI_025830 PE=3 SV=1
C4M3N2;B1N510	CCT-theta;T-complex protein 1 subunitTheta, putative	EHI_140600;EHI_071600	0.0222613	0.0720267	4.80444	33.1828	26.9428	31.6671	27.8019	31.5435	27.2353	9749999616	129000000	3409999872	234000000	3129999872	158000000					31	56.7	56.7	56.7	58.949	0	111.82	31	13	26	15	27	13	C4M3N2;B1N510	1365	>tr|C4M3N2|C4M3N2_ENTHI CCT-theta OS=Entamoeba histolytica OX=5759 GN=EHI_140600 PE=3 SV=1;>tr|B1N510|B1N510_ENTHI T-complex protein 1 subunitTheta, putative OS=Entamoeba histolytica OX=5759 GN=EHI_071600 PE=3 SV=1
Q1EQ42	Coated vesicle membrane protein, putative (Fragment)	EHI_096210	0.016541	0.065918	4.8034	28.632	22.7348	28.2625	23.48	27.7325	24.002	416000000	6980000	322000000	11700000	223000000	16800000					4	24.2	24.2	24.2	22.159	0	13.056	3	2	3	2	3	2	Q1EQ42	2171	>tr|Q1EQ42|Q1EQ42_ENTHI Coated vesicle membrane protein, putative (Fragment) OS=Entamoeba histolytica OX=5759 GN=EHI_096210 PE=3 SV=1
C4LYT6	Uncharacterized protein	EHI_010390	0.0031344	0.0488391	4.80023	23.9316	19	24.1871	19	23.2821	19	16000000	0	19100000	0	10200000	0			+	Plus DTT_Minus DTT	1	4.6	4.6	4.6	22.671	0.0011799	2.0924	1	0	1	0	1	0	C4LYT6	898	>tr|C4LYT6|C4LYT6_ENTHI Uncharacterized protein OS=Entamoeba histolytica OX=5759 GN=EHI_010390 PE=4 SV=1
C4M543	Protein kinase domain containing protein	EHI_078170	0.0224598	0.0720329	4.79389	28.4354	22.2243	28.1747	23.7796	26.8264	23.0509	363000000	4900000	303000000	14400000	119000000	8690000	+				2	0.8	0.8	0.8	219.86	1	-2	1	1	1	2	1	1	C4M543	1508	>tr|C4M543|C4M543_ENTHI Protein kinase domain containing protein OS=Entamoeba histolytica OX=5759 GN=EHI_078170 PE=4 SV=1
C4M5D4	Protein kinase domain containing protein	EHI_121880	0.0122146	0.0620459	4.791	30.3828	24.5522	29.8901	25.4041	29.4765	25.4202	1400000000	24600000	995000000	44400000	747000000	44900000					10	31.2	31.2	31.2	43.568	0	42.849	10	5	9	6	10	5	C4M5D4	1531	>tr|C4M5D4|C4M5D4_ENTHI Protein kinase domain containing protein OS=Entamoeba histolytica OX=5759 GN=EHI_121880 PE=2 SV=1
C4M7H5	Leucine rich repeat protein, BspA family	EHI_112030	0.00234463	0.0487947	4.79096	23.7389	19	24.217	19	23.417	19	14000000	0	19500000	0	11200000	0	+		+	Plus DTT_Minus DTT	1	0.9	0.9	0.9	126.51	1	-2	1	0	1	0	1	0	C4M7H5	1722	>tr|C4M7H5|C4M7H5_ENTHI Leucine rich repeat protein, BspA family OS=Entamoeba histolytica OX=5759 GN=EHI_112030 PE=4 SV=1
C4M343	V-type proton ATPase proteolipid subunit	EHI_059840	0.00897797	0.0559259	4.77537	32.2279	26.5448	31.6154	27.2262	31.2077	26.9539	5030000128	97900000	3289999872	157000000	2480000000	130000000					2	14.1	14.1	14.1	18.121	0	28.917	2	2	2	2	2	2	C4M343	1313	>tr|C4M343|C4M343_ENTHI V-type proton ATPase proteolipid subunit OS=Entamoeba histolytica OX=5759 GN=EHI_059840 PE=2 SV=1
C4LWB9	Uncharacterized protein	EHI_155700	0.025071	0.0754062	4.77419	24.0772	20.4576	25.2353	19	23.4676	19	17700000	1440000	39500000	0	11600000	0					2	5.6	5.6	5.6	45.609	0	3.5765	1	1	2	0	1	0	C4LWB9	637	>tr|C4LWB9|C4LWB9_ENTHI Uncharacterized protein OS=Entamoeba histolytica OX=5759 GN=EHI_155700 PE=4 SV=1
C4LWL8	Cullin, putative	EHI_069300	0.00184459	0.0487947	4.77131	24.0691	19	23.867	19	23.3778	19	17600000	0	15300000	0	10900000	0	+		+	Plus DTT_Minus DTT	1	1	1	1	85.848	1	-2	1	0	1	0	1	0	C4LWL8	669	>tr|C4LWL8|C4LWL8_ENTHI Cullin, putative OS=Entamoeba histolytica OX=5759 GN=EHI_069300 PE=3 SV=1
C4M1Q5	Thioredoxin, putative	EHI_062790	0.00744753	0.0559259	4.76566	29.5772	23.9847	29.1507	24.7796	28.5128	24.1795	801000000	16600000	596000000	28800000	383000000	19000000					6	82.1	82.1	82.1	12.195	0	34.979	5	1	6	1	5	1	C4M1Q5	1178	>tr|C4M1Q5|C4M1Q5_ENTHI Thioredoxin, putative OS=Entamoeba histolytica OX=5759 GN=EHI_062790 PE=4 SV=1
C4M9X3	Protein phosphatase family protein	EHI_179330	0.0137483	0.0625652	4.76446	30.933	25.2926	30.7771	25.8336	30.099	26.3894	2050000000	41100000	1840000000	59800000	1150000000	87900000					13	41.1	41.1	4.6	31.581	0	63.736	12	6	13	6	12	7	C4M9X3	1925	>tr|C4M9X3|C4M9X3_ENTHI Protein phosphatase family protein OS=Entamoeba histolytica OX=5759 GN=EHI_179330 PE=3 SV=1
B1N4B4;C4LUD2	RhoGAP domain containing protein	EHI_056130;EHI_049300	0.0121302	0.0620459	4.75943	24.6757	19	23.8858	20.0426	23.7594	19	26800000	0	15500000	1080000	14200000	0	+				2	5	5	5	41.273	1	-2	1	0	1	1	1	0	B1N4B4;C4LUD2	122	>tr|B1N4B4|B1N4B4_ENTHI RhoGAP domain containing protein OS=Entamoeba histolytica OX=5759 GN=EHI_056130 PE=4 SV=1;>tr|C4LUD2|C4LUD2_ENTHI RhoGAP domain containing protein OS=Entamoeba histolytica OX=5759 GN=EHI_049300 PE=4 SV=1
CON__Q3SZR3			0.0186488	0.0674722	3.67045	26.3861	23.7077	26.8019	22.4425	26.9977	23.0241	87700000	13700000	117000000	5700000	134000000	8530000		+			3	22.8	22.8	22.8	23.182	0	18.303	2	1	3	1	3	1	CON__Q3SZR3	2116	>Q3SZR3 SWISS-PROT:Q3SZR3 (Bos taurus) Alpha-1-acid glycoprotein precursor
C4M1S5;C4M1S6	Actinin-like protein, putative	EHI_164430;EHI_164440	0.0553268	0.111807	4.74823	32.1361	25.0567	30.9188	27.2979	30.5844	27.0401	4720000000	34900000	2030000000	165000000	1610000000	138000000					13	33.6	33.6	33.6	53.886	0	75.025	12	2	11	6	12	5	C4M1S5;C4M1S6	1184	>tr|C4M1S5|C4M1S5_ENTHI Actinin-like protein, putative OS=Entamoeba histolytica OX=5759 GN=EHI_164430 PE=4 SV=1;>tr|C4M1S6|C4M1S6_ENTHI Actinin-like protein, putative OS=Entamoeba histolytica OX=5759 GN=EHI_164440 PE=4 SV=1
C4LX69	Dihydrothymine dehydrogenase	EHI_012980	0.0272868	0.0783949	4.73673	36.5253	30.2077	35.2372	31.4919	34.9933	30.846	98900000768	1240000000	40499998720	3020000000	34200000512	1930000000					79	84.2	84.2	84.2	98.781	0	323.31	76	39	73	52	73	43	C4LX69	728	>tr|C4LX69|C4LX69_ENTHI Dihydrothymine dehydrogenase OS=Entamoeba histolytica OX=5759 GN=EHI_012980 PE=3 SV=1
C4LZ98	Uncharacterized protein	EHI_000470	0.0129266	0.0620854	4.72537	24.7129	19	22.8423	19	23.6209	19	27500000	0	7520000	0	12900000	0					2	2.8	2.8	2.8	85.161	0.0059946	1.5054	2	0	1	0	1	0	C4LZ98	942	>tr|C4LZ98|C4LZ98_ENTHI Uncharacterized protein OS=Entamoeba histolytica OX=5759 GN=EHI_000470 PE=3 SV=1
C4LTA0	60S ribosomal protein L10, putative	EHI_044810	0.0104901	0.0590501	4.72376	33.7849	28.1652	33.2759	28.6663	32.8792	28.9372	14800000000	301000000	10400000000	426000000	7900000256	514000000					22	69.5	69.5	69.5	23.784	0	65.116	20	14	22	13	20	15	C4LTA0;B1N5V8	298	>tr|C4LTA0|C4LTA0_ENTHI 60S ribosomal protein L10, putative OS=Entamoeba histolytica OX=5759 GN=EHI_044810 PE=2 SV=1
C4LSM2	Eukaryotic translation initiation factor 5A	EHI_151810	0.00981297	0.0584923	4.72027	32.7088	27.1604	31.6154	26.9203	31.3879	27.4707	7020000256	150000000	3289999872	127000000	2809999872	186000000					11	49.7	49.7	8.4	16.989	0	113.71	11	9	11	8	11	10	C4LSM2	226	>tr|C4LSM2|C4LSM2_ENTHI Eukaryotic translation initiation factor 5A OS=Entamoeba histolytica OX=5759 GN=EHI_151810 PE=3 SV=1
Q8WQH7	Protein kinase, putative	EHI_004790	0.0145788	0.0633714	4.71672	30.1604	24.5522	29.8203	24.918	29.141	25.5014	1200000000	24600000	948000000	31700000	592000000	47500000					8	26.8	24.5	24.5	39.389	0	201.42	7	4	7	4	7	4	Q8WQH7	2293	>tr|Q8WQH7|Q8WQH7_ENTHI Protein kinase, putative OS=Entamoeba histolytica OX=5759 GN=EHI_004790 PE=2 SV=1
C4M1A2	Presenilin	EHI_188280	0.183587	0.265083	4.71649	25.9738	19	26.1757	19	19	19	65900000	0	75800000	0	0	0					1	2.3	2.3	2.3	44.453	0.0017678	2.0902	1	1	1	0	0	0	C4M1A2	1133	>tr|C4M1A2|C4M1A2_ENTHI Presenilin OS=Entamoeba histolytica OX=5759 GN=EHI_188280 PE=3 SV=1
C4M9I7	Protein kinase, putative	EHI_011510	0.0282159	0.0789181	4.71527	30.9609	24.7182	29.5128	25.0975	29.3239	25.8361	2090000000	27600000	766000000	35900000	672000000	59900000					9	21.7	21.7	21.7	48.214	0	16.27	9	6	9	4	9	7	C4M9I7	1894	>tr|C4M9I7|C4M9I7_ENTHI Protein kinase, putative OS=Entamoeba histolytica OX=5759 GN=EHI_011510 PE=4 SV=1
C4M2V2	Uncharacterized protein	EHI_188850	0.0531989	0.109261	4.71257	25.4769	19	24.0609	19	24.6918	22.0918	46700000	0	17500000	0	27100000	4470000	+				1	3.1	3.1	3.1	25.682	1	-2	1	0	1	0	1	1	C4M2V2	1288	>tr|C4M2V2|C4M2V2_ENTHI Uncharacterized protein OS=Entamoeba histolytica OX=5759 GN=EHI_188850 PE=4 SV=1
C4MAR7;B1N623	Peroxiredoxin;Peroxiredoxin, putative (Fragment)	EHI_001420;EHI_139570	0.0795133	0.142358	4.71216	29.9677	22.7451	27.5536	22.9672	26.976	24.6486	1050000000	7030000	197000000	8200000	132000000	26300000					2	79.9	5.2	5.2	25.79	0	23.793	2	1	1	1	1	1	C4MAR7;B1N623	1977	>tr|C4MAR7|C4MAR7_ENTHI Peroxiredoxin OS=Entamoeba histolytica OX=5759 GN=EHI_001420 PE=3 SV=1;>tr|B1N623|B1N623_ENTHI Peroxiredoxin, putative (Fragment) OS=Entamoeba histolytica OX=5759 GN=EHI_139570 PE=4 SV=1
C4LXK4	Fe-hydrogenase, putative	EHI_073390	0.0184512	0.067458	4.71146	34.6995	28.6964	33.4702	29.2935	33.2193	29.2647	27900000256	435000000	11900000256	658000000	10000000000	645000000					34	74.6	74.6	72.2	51.167	0	323.31	34	14	32	15	31	14	C4LXK4	778	>tr|C4LXK4|C4LXK4_ENTHI Fe-hydrogenase, putative OS=Entamoeba histolytica OX=5759 GN=EHI_073390 PE=2 SV=1
C4LSR8	Branched-chain amino acid aminotransferase, putative	EHI_152310	0.0179377	0.0664714	4.70376	27.7517	22.1426	27.3578	22.3266	26.6595	23.1886	226000000	4630000	172000000	5260000	106000000	9560000					5	21.5	21.5	21.5	32.815	0	28.07	5	1	3	2	3	2	C4LSR8	241	>tr|C4LSR8|C4LSR8_ENTHI Branched-chain amino acid aminotransferase, putative OS=Entamoeba histolytica OX=5759 GN=EHI_152310 PE=3 SV=1
C4M0G3	Ribulose-phosphate 3-epimerase	EHI_006900	0.00309795	0.0488391	4.69973	26.1946	21.0559	26.9203	22.1916	26.4234	22.1916	76800000	2180000	127000000	4790000	90000000	4790000			+	Plus DTT_Minus DTT	1	5.1	5.1	5.1	23.761	0	2.849	1	1	1	1	1	1	C4M0G3	1057	>tr|C4M0G3|C4M0G3_ENTHI Ribulose-phosphate 3-epimerase OS=Entamoeba histolytica OX=5759 GN=EHI_006900 PE=3 SV=1
C4M7M1	Purine nucleoside phosphorylase, putative	EHI_200080	0.0178707	0.0664714	4.69804	32.2842	26.3256	31.5296	27.3066	31.2535	27.341	5230000128	84100000	3100000000	166000000	2560000000	170000000					14	43.1	43.1	43.1	34.754	0	159.58	13	4	12	8	12	8	C4M7M1	1729	>tr|C4M7M1|C4M7M1_ENTHI Purine nucleoside phosphorylase, putative OS=Entamoeba histolytica OX=5759 GN=EHI_200080 PE=4 SV=1
C4LUU2	Uncharacterized protein	EHI_178780	0.10051	0.168321	4.69706	28.1984	20.2764	26.6595	23.48	26.7389	23.7492	308000000	1270000	106000000	11700000	112000000	14100000					4	4.5	4.5	4.5	102.24	0	4.5543	4	1	3	1	3	1	C4LUU2	469	>tr|C4LUU2|C4LUU2_ENTHI Uncharacterized protein OS=Entamoeba histolytica OX=5759 GN=EHI_178780 PE=4 SV=1
C4M6D5	Uncharacterized protein	EHI_142880	0.0497094	0.104827	4.697	24.9316	19	24.632	19	24.0772	21.5498	32000000	0	26000000	0	17700000	3070000	+				1	2	2	2	51.875	1	-2	1	0	1	0	1	1	C4M6D5	1622	>tr|C4M6D5|C4M6D5_ENTHI Uncharacterized protein OS=Entamoeba histolytica OX=5759 GN=EHI_142880 PE=4 SV=1
C4M153	RNA recognition motif domain containing protein	EHI_107120	0.00625121	0.0542964	4.69481	24.3975	19	26.3153	21.7553	23.1269	19	22100000	0	83500000	3540000	9160000	0					3	10.6	10.6	10.6	43.602	0	7.6238	1	0	3	1	1	0	C4M153	1122	>tr|C4M153|C4M153_ENTHI RNA recognition motif domain containing protein OS=Entamoeba histolytica OX=5759 GN=EHI_107120 PE=4 SV=1
C4M8X4	Uncharacterized protein	EHI_120630	0.0252709	0.0754062	4.68444	27.3828	21.2764	26.4441	22.9316	26.7389	22.3045	175000000	2540000	91300000	8000000	112000000	5180000					3	1.6	1.6	1.6	294.53	0.0099581	1.2927	3	1	1	1	2	1	C4M8X4	1841	>tr|C4M8X4|C4M8X4_ENTHI Uncharacterized protein OS=Entamoeba histolytica OX=5759 GN=EHI_120630 PE=3 SV=1
C4M834	Rap/Ran GTPase activating protein, putative	EHI_108700	0.00892674	0.0559259	4.68442	24.5754	19	23.2535	19	23.2243	19	25000000	0	10000000	0	9800000	0	+				1	3.5	1.1	1.1	91.505	1	-2	1	0	1	0	1	0	C4M834	1764	>tr|C4M834|C4M834_ENTHI Rap/Ran GTPase activating protein, putative OS=Entamoeba histolytica OX=5759 GN=EHI_108700 PE=4 SV=1
C4LY08	Uncharacterized protein	EHI_035810	0.000435954	0.0487947	4.6777	28.2216	23.3645	27.3992	22.8783	27.2535	22.5983	313000000	10800000	177000000	7710000	160000000	6350000			+	Plus DTT_Minus DTT	4	8.2	8.2	8.2	49.752	0	6.4268	4	1	4	1	4	1	C4LY08	814	>tr|C4LY08|C4LY08_ENTHI Uncharacterized protein OS=Entamoeba histolytica OX=5759 GN=EHI_035810 PE=4 SV=1
C4LUZ4	Protein kinase, putative	EHI_092300	0.191219	0.267137	4.67062	26.976	19	25.0359	19	19	19	132000000	0	34400000	0	0	0	+				2	1.4	1.4	0.6	149.76	1	-2	1	0	2	0	0	0	C4LUZ4	481	>tr|C4LUZ4|C4LUZ4_ENTHI Protein kinase, putative OS=Entamoeba histolytica OX=5759 GN=EHI_092300 PE=4 SV=1
B1N4Q6	26S protease regulatory subunit 7, putative	EHI_080890	0.0691292	0.128802	4.67022	26.0084	19	25.797	21.3266	24.8336	22.3017	67500000	0	58300000	2630000	29900000	5170000					1	35.5	2.6	2.6	46.884	0.0045403	1.7832	1	1	1	1	1	1	B1N4Q6	142	>tr|B1N4Q6|B1N4Q6_ENTHI 26S protease regulatory subunit 7, putative OS=Entamoeba histolytica OX=5759 GN=EHI_080890 PE=2 SV=1
C4M6Z9	20 kDa antigen	EHI_057670	0.0495326	0.104752	4.66718	25.0233	21.7471	25.792	19	22.9334	19	34100000	3520000	58100000	0	8010000	0					2	13.8	13.8	13.8	20.937	0	5.1784	1	1	2	0	1	0	C4M6Z9	1664	>tr|C4M6Z9|C4M6Z9_ENTHI 20 kDa antigen OS=Entamoeba histolytica OX=5759 GN=EHI_057670 PE=4 SV=1
C4M1U6	4-methyl-5(B-hydroxyethyl)-thiazol monophosphate biosynthesis enzyme, putative	EHI_027600	0.100388	0.168245	4.66686	25.4738	22.8461	26.726	23.1795	26.8264	19	46600000	7540000	111000000	9500000	119000000	0					3	21.2	21.2	21.2	19.804	0	10.61	2	1	3	1	2	0	C4M1U6	1192	>tr|C4M1U6|C4M1U6_ENTHI 4-methyl-5(B-hydroxyethyl)-thiazol monophosphate biosynthesis enzyme, putative OS=Entamoeba histolytica OX=5759 GN=EHI_027600 PE=4 SV=1
B1N2F9	Type A flavoprotein, putative	EHI_096710	0.00622636	0.0542964	4.65649	35.4943	30.1115	35.6839	31.2759	34.9634	30.7849	48399998976	1160000000	55199997952	2600000000	33500000256	1850000000					36	84	84	81.3	46.027	0	323.31	35	22	35	24	35	23	B1N2F9	8	>tr|B1N2F9|B1N2F9_ENTHI Type A flavoprotein, putative OS=Entamoeba histolytica OX=5759 GN=EHI_096710 PE=2 SV=1
C4M5D7	Acyl-coA synthetase, putative	EHI_131880	0.0372654	0.0878991	4.65143	33.2193	26.726	31.9295	28.3282	31.8081	27.9484	10000000000	111000000	4089999872	337000000	3760000000	259000000					39	42.6	42.6	40.7	114.57	0	229.25	37	14	35	19	34	16	C4M5D7	1533	>tr|C4M5D7|C4M5D7_ENTHI Acyl-coA synthetase, putative OS=Entamoeba histolytica OX=5759 GN=EHI_131880 PE=4 SV=1
C4LT85	Protein kinase, putative	EHI_044640	0.0356901	0.087134	4.64729	26.0629	20.2419	26.0975	20.85	25.019	22.1457	70100000	1240000	71800000	1890000	34000000	4640000					2	4.7	4.7	4.7	43.871	0.0060175	1.5274	1	1	2	1	2	2	C4LT85	295	>tr|C4LT85|C4LT85_ENTHI Protein kinase, putative OS=Entamoeba histolytica OX=5759 GN=EHI_044640 PE=4 SV=1
C4LUA1	Glutamate synthase beta subunit, putative	EhNO1	0.00843196	0.0559259	4.6334	34.402	28.9174	33.2897	29.0003	32.9797	28.8534	22699999232	507000000	10499999744	537000000	8470000128	485000000					38	63.2	63.2	63.2	49.257	0	323.31	34	14	37	16	34	16	C4LUA1;C4LTE7	407	>tr|C4LUA1|C4LUA1_ENTHI Glutamate synthase beta subunit, putative OS=Entamoeba histolytica OX=5759 GN=EhNO1 PE=4 SV=1
C4LYQ0	Uncharacterized protein	EHI_004370	0.0118363	0.0618434	4.63231	32.0217	26.9869	31.8719	26.632	31.4727	27.8504	4360000000	133000000	3929999872	104000000	2980000000	242000000					18	46.6	46.6	46.6	39.236	0	68.429	17	7	17	7	16	10	C4LYQ0	888	>tr|C4LYQ0|C4LYQ0_ENTHI Uncharacterized protein OS=Entamoeba histolytica OX=5759 GN=EHI_004370 PE=2 SV=1
C4M8I8	Mannose-6-phosphate isomerase	EHI_162210	0.0618358	0.120206	4.62822	24.867	19	24.8044	19	24.4551	22.2419	30600000	0	29300000	0	23000000	4960000					1	2.4	2.4	2.4	42.791	0.0034884	1.9782	1	0	1	0	1	1	C4M8I8	1806	>tr|C4M8I8|C4M8I8_ENTHI Mannose-6-phosphate isomerase OS=Entamoeba histolytica OX=5759 GN=EHI_162210 PE=3 SV=1
Q6AW65	EhRab7D protein	EhRAB7D	0.00534016	0.0536181	4.6259	28.5463	23.417	28.3324	23.5638	27.6663	23.6865	392000000	11200000	338000000	12400000	213000000	13500000					4	22.5	22.5	22.5	22.904	0	12.391	4	2	4	2	4	2	Q6AW65	2273	>tr|Q6AW65|Q6AW65_ENTHI EhRab7D protein OS=Entamoeba histolytica OX=5759 GN=EhRAB7D PE=3 SV=1
C4M586	Zinc finger domain containing protein	EHI_154180	0.016756	0.0659748	4.62313	26.0275	20.2877	24.275	20.6186	25.5225	21.0493	68400000	1280000	20300000	1610000	48200000	2170000					2	2	2	2	117.49	0	3.5905	2	1	1	1	2	1	C4M586	1522	>tr|C4M586|C4M586_ENTHI Zinc finger domain containing protein OS=Entamoeba histolytica OX=5759 GN=EHI_154180 PE=4 SV=1
C4M8Q4	General transcription and DNA repair factor IIH helicase subunit XPD	EHI_132410	0.144668	0.222696	4.62054	25.5195	19	25.6784	19	25.6264	24.9628	48100000	0	53700000	0	51800000	32700000	+				1	1.6	1.6	1.6	89.957	1	-2	1	0	1	0	1	1	C4M8Q4	1820	>tr|C4M8Q4|C4M8Q4_ENTHI General transcription and DNA repair factor IIH helicase subunit XPD OS=Entamoeba histolytica OX=5759 GN=EHI_132410 PE=4 SV=1
C4LZW8;B1N363	26S protease regulatory subunit, putative;26S protease regulatory subunit S10B, putative	EHI_194570;EHI_194070	0.00747938	0.0559259	4.61714	29.9259	24.7543	29.6075	24.7645	29.668	25.8312	1020000000	28300000	818000000	28500000	853000000	59700000					13	43.7	40.7	40.7	44.21	0	32.357	12	5	8	3	9	6	C4LZW8;B1N363	998	>tr|C4LZW8|C4LZW8_ENTHI 26S protease regulatory subunit, putative OS=Entamoeba histolytica OX=5759 GN=EHI_194570 PE=3 SV=1;>tr|B1N363|B1N363_ENTHI 26S protease regulatory subunit S10B, putative OS=Entamoeba histolytica OX=5759 GN=EHI_194070 PE=4 SV=1
C4M5W5	Uncharacterized protein	EHI_026450	0.0366613	0.087611	4.61314	29.0111	23.7895	28.1747	22.3831	27.2625	24.4362	541000000	14500000	303000000	5470000	161000000	22700000					8	15.2	15.2	15.2	52.493	0	15	8	3	7	1	7	3	C4M5W5	1577	>tr|C4M5W5|C4M5W5_ENTHI Uncharacterized protein OS=Entamoeba histolytica OX=5759 GN=EHI_026450 PE=3 SV=1
B1N2K6	Protein kinase, putative	EHI_068600	0.0273807	0.0784467	4.60627	29.4433	23.6971	29.0557	24.1015	28.1459	25.0275	730000000	13600000	558000000	18000000	297000000	34200000					13	31	31	27.8	54.402	0	44.233	12	4	11	4	10	7	B1N2K6	19	>tr|B1N2K6|B1N2K6_ENTHI Protein kinase, putative OS=Entamoeba histolytica OX=5759 GN=EHI_068600 PE=3 SV=1
C4LY09	Uncharacterized protein	EHI_035820	0.04493	0.0988214	4.59692	28.5315	22.3045	28.4433	23.632	26.1565	23.4041	388000000	5180000	365000000	13000000	74800000	11100000					5	9.3	9.3	9.3	82.451	0	9.461	4	1	5	2	3	2	C4LY09	815	>tr|C4LY09|C4LY09_ENTHI Uncharacterized protein OS=Entamoeba histolytica OX=5759 GN=EHI_035820 PE=4 SV=1
B1N3P0;B1N3F3	RNAseL inhibitor-like protein, putative;ATP-binding cassette sub-family E member 1, putative	EHI_156200;EHI_150540	0.0142509	0.0628563	4.59427	32.8955	27.217	31.6022	27.3494	31.5709	27.7195	7990000128	156000000	3260000000	171000000	3190000128	221000000					32	44.9	44.9	44.9	73.655	0	174.52	28	14	29	14	29	14	B1N3P0;B1N3F3;B1N3F2	87	>tr|B1N3P0|B1N3P0_ENTHI RNAseL inhibitor-like protein, putative OS=Entamoeba histolytica OX=5759 GN=EHI_156200 PE=4 SV=1;>tr|B1N3F3|B1N3F3_ENTHI ATP-binding cassette sub-family E member 1, putative OS=Entamoeba histolytica OX=5759 GN=EHI_150540 PE=4 SV=1
C4LUB1	Zinc finger domain containing protein	EHI_110620	0.00718995	0.0559259	4.58479	24.3376	19	23.391	19	23.0258	19	21200000	0	11000000	0	8540000	0	+				1	5.3	5.3	5.3	17.024	1	-2	1	0	1	0	1	0	C4LUB1	411	>tr|C4LUB1|C4LUB1_ENTHI Zinc finger domain containing protein OS=Entamoeba histolytica OX=5759 GN=EHI_110620 PE=4 SV=1
C4M129	Ras GTPase-activating protein, putative	EHI_105250	0.0195002	0.068849	4.58146	29.2331	24.6918	29.5052	23.7796	28.8945	25.417	631000000	27100000	762000000	14400000	499000000	44800000					12	20.8	20.8	20.8	82.399	0	31.638	8	5	9	2	11	6	C4M129	1116	>tr|C4M129|C4M129_ENTHI Ras GTPase-activating protein, putative OS=Entamoeba histolytica OX=5759 GN=EHI_105250 PE=4 SV=1
C4M0E3	Thioredoxin, putative	EHI_006700	0.0166257	0.065918	4.57888	28.8234	23.2273	27.8682	23.2535	27.7129	24.1871	475000000	9820000	245000000	10000000	220000000	19100000					6	40	40	40	17.637	0	20.099	5	2	5	3	5	3	C4M0E3	1052	>tr|C4M0E3|C4M0E3_ENTHI Thioredoxin, putative OS=Entamoeba histolytica OX=5759 GN=EHI_006700 PE=4 SV=1
C4M497	Uncharacterized protein	EHI_098000	0.0221784	0.0720267	4.57784	29.0788	23.1143	28.6075	24.7234	28.2759	24.391	567000000	9080000	409000000	27700000	325000000	22000000					4	23.2	23.2	23.2	32.267	0	34.163	3	1	3	3	3	3	C4M497	1436	>tr|C4M497|C4M497_ENTHI Uncharacterized protein OS=Entamoeba histolytica OX=5759 GN=EHI_098000 PE=2 SV=1
C4LXD0	tRNA (Cytosine-5-)-methyltransferase, putative	EHI_098500	0.0334842	0.0847868	4.5777	25.0148	19	23.6757	19	22.0426	19	33900000	0	13400000	0	4320000	0					2	4.6	4.6	4.6	69.663	0.004	1.8349	1	0	1	0	1	0	C4LXD0	749	>tr|C4LXD0|C4LXD0_ENTHI tRNA (Cytosine-5-)-methyltransferase, putative OS=Entamoeba histolytica OX=5759 GN=EHI_098500 PE=3 SV=1
C4M1E6	E3 ubiquitin-protein ligase	EHI_030770	0.119675	0.192464	4.57751	29.8249	21.7675	26.8142	24.1871	26.7129	23.6649	951000000	3570000	118000000	19100000	110000000	13300000					11	8.7	8.7	8.7	159.89	0	12.752	8	2	7	4	8	4	C4M1E6	1146	>tr|C4M1E6|C4M1E6_ENTHI E3 ubiquitin-protein ligase OS=Entamoeba histolytica OX=5759 GN=EHI_030770 PE=3 SV=1
Q1EPY8	V-SNARE protein VampD3	EHI_081370	0.186613	0.265083	4.57678	19	19	26.4661	19	25.2643	19	0	0	92700000	0	40300000	0					2	31.3	31.3	31.3	11.089	0	2.8596	0	0	1	0	1	1	Q1EPY8	2149	>tr|Q1EPY8|Q1EPY8_ENTHI V-SNARE protein VampD3 OS=Entamoeba histolytica OX=5759 GN=EHI_081370 PE=4 SV=1
C4M4L3	Lecithin:cholesterol acyltransferase domain-containing protein	EHI_031360	0.172652	0.26038	4.558	26.4661	19	24.6431	24.3712	24.9361	19	92700000	0	26200000	21700000	32100000	0					5	11.8	11.8	11.8	49.683	0	8.3685	4	0	2	1	2	0	C4M4L3	1469	>tr|C4M4L3|C4M4L3_ENTHI Lecithin:cholesterol acyltransferase domain-containing protein OS=Entamoeba histolytica OX=5759 GN=EHI_031360 PE=4 SV=1
B1N2G5	EF-hand calcium-binding domain containing protein	EHI_148810	0.120092	0.192718	4.55798	26.2891	19	25.8881	20.8269	24.3712	23.0476	82000000	0	62100000	1860000	21700000	8670000					3	12.1	12.1	12.1	35.082	0	8.6852	2	0	3	1	1	1	B1N2G5	10	>tr|B1N2G5|B1N2G5_ENTHI EF-hand calcium-binding domain containing protein OS=Entamoeba histolytica OX=5759 GN=EHI_148810 PE=4 SV=1
C4M5E0	Uncharacterized protein	EHI_131910	0.183659	0.265083	4.55726	25.7024	19	25.9694	19	19	19	54600000	0	65700000	0	0	0					3	14.2	14.2	14.2	36.576	0	7.5781	2	0	3	0	0	0	C4M5E0	1534	>tr|C4M5E0|C4M5E0_ENTHI Uncharacterized protein OS=Entamoeba histolytica OX=5759 GN=EHI_131910 PE=4 SV=1
C4M2T4	Uncharacterized protein	EHI_077250	0.191766	0.267153	4.55632	26.8142	19	26.8974	21.0426	19	19	118000000	0	125000000	2160000	0	0	+				1	3.2	3.2	3.2	47.131	1	-2	1	0	1	1	0	0	C4M2T4	1283	>tr|C4M2T4|C4M2T4_ENTHI Uncharacterized protein OS=Entamoeba histolytica OX=5759 GN=EHI_077250 PE=4 SV=1
C4M4K6	Serine/threonine-protein phosphatase	EHI_031240	0.008184	0.0559259	4.54936	28.1556	22.9477	27.7453	23.0902	27.524	23.7389	299000000	8090000	225000000	8930000	193000000	14000000					4	12.6	12.6	12.6	35.411	0	14.237	2	1	4	1	3	1	C4M4K6	1466	>tr|C4M4K6|C4M4K6_ENTHI Serine/threonine-protein phosphatase OS=Entamoeba histolytica OX=5759 GN=EHI_031240 PE=3 SV=1
C4LYL2	HEAT repeat domain containing protein	EHI_118620	0.0831202	0.146347	4.54802	26.3307	19	26.2553	22.8288	26.2909	23.4041	84400000	0	80100000	7450000	82100000	11100000					2	1.1	1.1	1.1	181.07	0.0074587	1.3832	2	0	2	1	2	1	C4LYL2	872	>tr|C4LYL2|C4LYL2_ENTHI HEAT repeat domain containing protein OS=Entamoeba histolytica OX=5759 GN=EHI_118620 PE=4 SV=1
Q8WR14	Hybrid-cluster protein	HCP	0.0244293	0.0747773	4.54302	34.5121	28.5389	33.2336	29.5951	33.0705	29.0531	24500000768	390000000	10099999744	811000000	9020000256	557000000					33	71.1	71.1	71.1	60.322	0	323.31	32	13	29	14	29	15	Q8WR14	2294	>tr|Q8WR14|Q8WR14_ENTHI Hybrid-cluster protein OS=Entamoeba histolytica OX=5759 GN=HCP PE=2 SV=1
B1N3X3	Uncharacterized protein	EHI_117690	0.0309025	0.0818084	4.53686	29.9677	23.8191	29.104	25.6012	29.1386	25.1795	1050000000	14800000	577000000	50900000	591000000	38000000					8	65.9	65.9	65.9	14.848	0	25.131	8	2	6	4	7	5	B1N3X3	100	>tr|B1N3X3|B1N3X3_ENTHI Uncharacterized protein OS=Entamoeba histolytica OX=5759 GN=EHI_117690 PE=4 SV=1
C4MAB0	AIG1 family protein	EHI_129470	0.184953	0.265083	4.5357	26.2096	19	25.3975	19	19	19	77600000	0	44200000	0	0	0					1	3.8	3.8	3.8	34.34	0	2.8308	1	0	1	0	0	0	C4MAB0	1952	>tr|C4MAB0|C4MAB0_ENTHI AIG1 family protein OS=Entamoeba histolytica OX=5759 GN=EHI_129470 PE=4 SV=1
C4LYU0	Tubulin alpha chain	EHI_010530	0.216582	0.291731	4.53523	28.6005	19	25.8811	24.2961	26.9428	24.5225	407000000	0	61800000	20600000	129000000	24100000					3	43.7	10.8	10.8	50.34	0	9.7568	3	0	1	2	2	3	C4LYU0	899	>tr|C4LYU0|C4LYU0_ENTHI Tubulin alpha chain OS=Entamoeba histolytica OX=5759 GN=EHI_010530 PE=3 SV=1
C4MAB2	CXXC-rich protein	EHI_129490	0.114608	0.186196	4.53346	28.2625	21.0359	26.3629	21.4273	24.4298	22.9916	322000000	2150000	86300000	2820000	22600000	8340000					2	4.6	4.6	4.6	51.494	0.0040323	1.9075	2	1	2	1	1	2	C4MAB2	1953	>tr|C4MAB2|C4MAB2_ENTHI CXXC-rich protein OS=Entamoeba histolytica OX=5759 GN=EHI_129490 PE=4 SV=1
C4LV85	Centromeric protein E, putative	EHI_183120	0.185394	0.265083	4.52928	19	19	26.2571	19	25.3307	19	0	0	80200000	0	42200000	0					1	1.1	1.1	1.1	121.46	0.0011862	2.1242	0	0	1	0	1	0	C4LV85	508	>tr|C4LV85|C4LV85_ENTHI Centromeric protein E, putative OS=Entamoeba histolytica OX=5759 GN=EHI_183120 PE=4 SV=1
C4M7H0	Protein arginine N-methyltransferase	EHI_158560	0.00229723	0.0487947	4.5257	27.9203	23.7995	28.3324	23.4676	28.2123	23.6209	254000000	14600000	338000000	11600000	311000000	12900000			+	Plus DTT_Minus DTT	2	2.6	2.6	2.6	68.669	0.0074547	1.3798	1	2	1	2	1	2	C4M7H0	1720	>tr|C4M7H0|C4M7H0_ENTHI Protein arginine N-methyltransferase OS=Entamoeba histolytica OX=5759 GN=EHI_158560 PE=3 SV=1
C4LXT3	Uncharacterized protein	EHI_087400	0.00288959	0.0487947	4.52422	24.0105	19	23.2521	19	23.3101	19	16900000	0	9990000	0	10400000	0			+	Plus DTT_Minus DTT	1	4.1	4.1	4.1	30.954	0	2.9431	1	0	1	0	1	0	C4LXT3	795	>tr|C4LXT3|C4LXT3_ENTHI Uncharacterized protein OS=Entamoeba histolytica OX=5759 GN=EHI_087400 PE=4 SV=1
B1N4U0	Uncharacterized protein	EHI_196740	0.0902281	0.155785	4.50839	26.6181	23.0426	26.3612	19	25.7619	23.1734	103000000	8640000	86200000	0	56900000	9460000					1	3.8	3.8	3.8	33.544	0.005895	1.4145	1	1	1	0	1	1	B1N4U0	145	>tr|B1N4U0|B1N4U0_ENTHI Uncharacterized protein OS=Entamoeba histolytica OX=5759 GN=EHI_196740 PE=4 SV=1
C4LZV9	Uncharacterized protein	EHI_194470	0.0130178	0.0620854	4.50698	28.9088	23.5045	28.6285	24.1174	27.8445	24.239	504000000	11900000	415000000	18200000	241000000	19800000					7	19	19	19	44.738	0	25.989	7	4	7	4	6	3	C4LZV9	994	>tr|C4LZV9|C4LZV9_ENTHI Uncharacterized protein OS=Entamoeba histolytica OX=5759 GN=EHI_194470 PE=4 SV=1
C4M3T5	B-keto acyl reductase, putative	EHI_163540	0.0264056	0.0766382	4.50493	31.94	25.9672	31.4184	27.4073	30.7292	27.1984	4120000000	65600000	2870000128	178000000	1780000000	154000000					15	40.1	40.1	40.1	36.568	0	156.46	13	4	15	7	14	4	C4M3T5	1385	>tr|C4M3T5|C4M3T5_ENTHI B-keto acyl reductase, putative OS=Entamoeba histolytica OX=5759 GN=EHI_163540 PE=3 SV=1
C4M7F5	Alcohol dehydrogenase, putative	EHI_166490	0.0461773	0.100321	4.50428	34.1377	27.632	32.7353	29.3494	32.4507	28.8294	18900000768	208000000	7150000128	684000000	5870000128	477000000					23	60.9	59.2	59.2	46.614	0	261.63	23	11	19	15	19	14	C4M7F5	1714	>tr|C4M7F5|C4M7F5_ENTHI Alcohol dehydrogenase, putative OS=Entamoeba histolytica OX=5759 GN=EHI_166490 PE=2 SV=1
B1N479	Uncharacterized protein	EHI_075840	0.0333001	0.0845397	4.50427	26.317	21.4874	25.2996	22.391	24.7745	19	83600000	2940000	41300000	5500000	28700000	0					1	4.2	4.2	4.2	38.697	0	9.502	1	1	1	1	1	0	B1N479	116	>tr|B1N479|B1N479_ENTHI Uncharacterized protein OS=Entamoeba histolytica OX=5759 GN=EHI_075840 PE=4 SV=1
C4M0U2	Ubiquitin-conjugating enzyme family protein	EHI_100110	0.0440934	0.0976009	4.50041	28.7486	24.7543	28.4314	25.3135	27.7958	21.4067	451000000	28300000	362000000	41700000	233000000	2780000					5	28.8	28.8	28.8	25.145	0	13.594	5	2	5	3	4	1	C4M0U2	1091	>tr|C4M0U2|C4M0U2_ENTHI Ubiquitin-conjugating enzyme family protein OS=Entamoeba histolytica OX=5759 GN=EHI_100110 PE=2 SV=1
Q5NSZ9	Rab family GTPase (Fragment)	EhRabX17	0.0234562	0.0731721	4.5003	26.726	21.1642	26.1075	21.343	25.9361	22.7614	111000000	2350000	72300000	2660000	64200000	7110000					3	15	15	15	22.207	0	4.4679	3	2	2	1	2	2	Q5NSZ9	2256	>tr|Q5NSZ9|Q5NSZ9_ENTHI Rab family GTPase (Fragment) OS=Entamoeba histolytica OX=5759 GN=EhRabX17 PE=3 SV=1
C4LTM2	Ubiquitin carboxyl-terminal hydrolase	EHI_012290	0.00799128	0.0559259	4.49817	28.9259	24.4551	29.2647	24.0526	28.611	24.7995	510000000	23000000	645000000	17400000	410000000	29200000					12	13.5	13.5	13.5	102.97	0	32.357	7	3	12	2	8	3	C4LTM2	330	>tr|C4LTM2|C4LTM2_ENTHI Ubiquitin carboxyl-terminal hydrolase OS=Entamoeba histolytica OX=5759 GN=EHI_012290 PE=3 SV=1
B1N5A8	Peroxiredoxin	EHI_123390	0.025929	0.0760102	4.4964	33.715	27.7895	32.3854	28.2803	31.9295	28.4707	14099999744	232000000	5609999872	326000000	4089999872	372000000					7	82.7	22.4	13.5	26.735	0	59.832	7	5	6	5	6	5	B1N5A8	166	>tr|B1N5A8|B1N5A8_ENTHI Peroxiredoxin OS=Entamoeba histolytica OX=5759 GN=EHI_123390 PE=3 SV=1
C4LUQ1	Uncharacterized protein	EHI_023410	0.0506244	0.105855	4.49545	29.3557	22.976	28.3992	24.0359	27.1795	24.4362	687000000	8250000	354000000	17200000	152000000	22700000					8	23.9	23.9	23.9	48.705	0	56.343	8	2	7	3	5	4	C4LUQ1	453	>tr|C4LUQ1|C4LUQ1_ENTHI Uncharacterized protein OS=Entamoeba histolytica OX=5759 GN=EHI_023410 PE=4 SV=1
C4M2S9	DNA helicase	EHI_076880	0.144616	0.222696	4.48665	25.9738	19	24.7796	19	22.6164	21.9098	65900000	0	28800000	0	6430000	3940000	+				1	0.9	0.9	0.9	92.791	1	-2	1	0	1	0	1	1	C4M2S9	1282	>tr|C4M2S9|C4M2S9_ENTHI DNA helicase OS=Entamoeba histolytica OX=5759 GN=EHI_076880 PE=3 SV=1
C4M269	Uncharacterized protein	EHI_174220	0.120626	0.193296	4.48597	27.1984	22.9899	26.5898	19	25.9628	24.3031	154000000	8330000	101000000	0	65400000	20700000					1	6.7	6.7	6.7	22.825	0.0023447	2.05	1	1	1	0	1	1	C4M269	1221	>tr|C4M269|C4M269_ENTHI Uncharacterized protein OS=Entamoeba histolytica OX=5759 GN=EHI_174220 PE=4 SV=1
C4M034	Uncharacterized protein	EHI_134850	0.00456703	0.0515735	4.48516	24.0935	19	23.1795	19	23.1825	19	17900000	0	9500000	0	9520000	0	+				1	4.7	2.1	2.1	51.236	1	-2	1	0	1	0	1	0	C4M034	1022	>tr|C4M034|C4M034_ENTHI Uncharacterized protein OS=Entamoeba histolytica OX=5759 GN=EHI_134850 PE=3 SV=1
C4LVW8	PH-protein kinase domain containing protein	EHI_125820	0.0369568	0.0877893	4.48295	24.6918	19	23.9316	21.1765	24.002	19	27100000	0	16000000	2370000	16800000	0					1	4.1	2.3	2.3	51.445	0.0059013	1.4293	1	0	1	1	1	0	C4LVW8	592	>tr|C4LVW8|C4LVW8_ENTHI PH-protein kinase domain containing protein OS=Entamoeba histolytica OX=5759 GN=EHI_125820 PE=3 SV=1
C4LVM4	Sec7 domain protein	EHI_103820	0.0152113	0.0644052	4.4794	29.8294	24.6375	29.5555	24.6865	29.2467	25.8694	954000000	26100000	789000000	27000000	637000000	61300000					18	18	18	18	135.06	0	61.335	18	7	16	6	16	9	C4LVM4	554	>tr|C4LVM4|C4LVM4_ENTHI Sec7 domain protein OS=Entamoeba histolytica OX=5759 GN=EHI_103820 PE=4 SV=1
C4M1F1	Calcium-transporting ATPase	EHI_030830	0.0505053	0.105762	4.47654	33.9153	27.3662	32.5412	28.8534	32.0958	28.9031	16199999488	173000000	6249999872	485000000	4590000128	502000000					52	49.9	49.1	49.1	113.94	0	323.31	50	17	46	29	43	27	C4M1F1	1147	>tr|C4M1F1|C4M1F1_ENTHI Calcium-transporting ATPase OS=Entamoeba histolytica OX=5759 GN=EHI_030830 PE=3 SV=1
C4LXS4	Uncharacterized protein	EHI_014400	0.0119786	0.0620459	4.47488	30.0349	24.5754	29.5664	25.6595	29.6424	25.5841	1100000000	25000000	795000000	53000000	838000000	50300000					7	47.6	47.6	47.6	24.46	0	73.873	7	1	6	2	7	2	C4LXS4	793	>tr|C4LXS4|C4LXS4_ENTHI Uncharacterized protein OS=Entamoeba histolytica OX=5759 GN=EHI_014400 PE=4 SV=1
C4M0X6	Immuno-dominant variable surface antigen	EHI_015380	0.035825	0.0871932	4.4679	34.1146	27.9203	32.9557	29.1747	32.3515	28.9231	18599999488	254000000	8329999872	606000000	5480000000	509000000					52	50.5	50.5	50.5	125.43	0	323.31	49	17	45	25	42	24	C4M0X6	1100	>tr|C4M0X6|C4M0X6_ENTHI Immuno-dominant variable surface antigen OS=Entamoeba histolytica OX=5759 GN=EHI_015380 PE=4 SV=1
C4M021	Ankyrin repeat protein, putative	EHI_134720	0.00228645	0.0487947	4.4656	28.4274	23.848	27.965	23.9134	27.726	22.9601	361000000	15100000	262000000	15800000	222000000	8160000			+	Plus DTT_Minus DTT	3	19.9	19.9	19.9	17.822	0	15.584	3	2	3	2	3	2	C4M021	1017	>tr|C4M021|C4M021_ENTHI Ankyrin repeat protein, putative OS=Entamoeba histolytica OX=5759 GN=EHI_134720 PE=4 SV=1
Q5NT23	Rab family GTPase (Fragment)	EhRabK1	0.0202475	0.0701213	4.46445	30.6713	25.1565	29.6198	25.0317	28.8916	25.6012	1710000000	37400000	825000000	34300000	498000000	50900000					12	59.9	59.9	59.9	24.495	0	108.49	12	4	11	5	8	4	Q5NT23	2263	>tr|Q5NT23|Q5NT23_ENTHI Rab family GTPase (Fragment) OS=Entamoeba histolytica OX=5759 GN=EhRabK1 PE=3 SV=1
C4M1Y9	Short chain dehydrogenase family protein	EHI_165070	0.0567719	0.11388	4.45978	31.4184	24.824	30.7129	26.7895	30.3088	27.4473	2870000128	29700000	1760000000	116000000	1330000000	183000000					14	41.2	41.2	41.2	36.669	0	104.24	13	4	12	6	12	5	C4M1Y9	1206	>tr|C4M1Y9|C4M1Y9_ENTHI Short chain dehydrogenase family protein OS=Entamoeba histolytica OX=5759 GN=EHI_165070 PE=3 SV=1
C4LVL5	Threonyl-tRNA synthetase	EHI_103730	0.0169463	0.0659748	4.45919	33.7946	28.1795	32.8422	29.1483	32.7006	28.632	14899999744	304000000	7699999744	595000000	6979999744	416000000					43	52.1	52.1	52.1	77.863	0	232.07	40	23	42	29	41	24	C4LVL5	550	>tr|C4LVL5|C4LVL5_ENTHI Threonyl-tRNA synthetase OS=Entamoeba histolytica OX=5759 GN=EHI_103730 PE=3 SV=1
C4LYL8	Uncharacterized protein	EHI_118680	0.0986005	0.166123	4.45899	27.0296	23.3778	26.8142	24.48	26.391	19	137000000	10900000	118000000	23400000	88000000	0					2	1.8	1.8	1.8	112.79	0.0012469	2.4698	1	1	1	1	1	0	C4LYL8	874	>tr|C4LYL8|C4LYL8_ENTHI Uncharacterized protein OS=Entamoeba histolytica OX=5759 GN=EHI_118680 PE=4 SV=1
O15782	Chaperonin 1 60 kDa	cpn60	0.00172006	0.0487947	4.45646	27.6251	23.0359	27.189	22.4996	26.7645	22.6736	207000000	8600000	153000000	5930000	114000000	6690000			+	Plus DTT_Minus DTT	8	19.4	19.4	19.4	56.839	0	10.062	6	4	5	2	5	2	O15782	2144	>tr|O15782|O15782_ENTHI Chaperonin 1 60 kDa OS=Entamoeba histolytica OX=5759 GN=cpn60 PE=3 SV=1
C4M012	DnaJ domain containing protein	EHI_134630	0.361856	0.44293	4.44936	27.9539	19	26.4892	19	19	22.0951	260000000	0	94200000	0	0	4480000					3	4.3	4.3	4.3	83.908	0	3.8003	2	0	2	0	0	1	C4M012;B1N4T3	1013	>tr|C4M012|C4M012_ENTHI DnaJ domain containing protein OS=Entamoeba histolytica OX=5759 GN=EHI_134630 PE=4 SV=1
C4M822	Uncharacterized protein	EHI_002200	0.192817	0.267653	4.44683	26.6865	19	24.654	19	19	19	108000000	0	26400000	0	0	0					1	3.9	3.9	3.9	58.364	0.0099476	1.2866	1	0	1	0	0	0	C4M822	1761	>tr|C4M822|C4M822_ENTHI Uncharacterized protein OS=Entamoeba histolytica OX=5759 GN=EHI_002200 PE=4 SV=1
C4MBP3;C4MA54;C4M3Q0;B1N5L9	Peroxiredoxin, putative;Peroxiredoxin	EHI_122310;EHI_061980	0.0196929	0.0690728	4.44495	38.0471	32.3489	36.8399	32.8645	36.4146	32.7533	283999993856	5470000128	122999996416	7820000256	91600003072	7240000000					41	82.7	82.7	0	26.773	0	323.31	39	24	39	20	38	23	C4MBP3;C4MA54;C4M3Q0;B1N5L9	2035	>tr|C4MBP3|C4MBP3_ENTHI Peroxiredoxin, putative OS=Entamoeba histolytica OX=5759 GN=EHI_122310 PE=3 SV=1;>tr|C4MA54|C4MA54_ENTHI Peroxiredoxin OS=Entamoeba histolytica OX=5759 GN=EHI_061980 PE=2 SV=1;>tr|C4M3Q0|C4M3Q0_ENTHI Peroxiredoxin OS=Entamoeba histo
C4LTF7	Ubiquitin carboxyl-terminal hydrolase domain containing protein	EHI_045440	0.0397731	0.091396	4.4415	32.1813	25.9203	30.6198	27.2262	30.3828	26.7129	4870000128	63500000	1650000000	157000000	1400000000	110000000					42	29.6	29.6	29.6	172.02	0	162.29	38	12	33	19	31	17	C4LTF7	312	>tr|C4LTF7|C4LTF7_ENTHI Ubiquitin carboxyl-terminal hydrolase domain containing protein OS=Entamoeba histolytica OX=5759 GN=EHI_045440 PE=4 SV=1
C4M3G8	Uncharacterized protein	EHI_017630	0.0169428	0.0659748	4.43971	30.3828	24.8288	30.2647	26.0711	29.4804	25.9088	1400000000	29800000	1290000000	70500000	749000000	63000000					11	29.3	29.3	27.5	45.552	0	28.021	7	4	11	7	10	5	C4M3G8	1345	>tr|C4M3G8|C4M3G8_ENTHI Uncharacterized protein OS=Entamoeba histolytica OX=5759 GN=EHI_017630 PE=4 SV=1
C4M297	Cleavage and polyadenylation specificity factor 73 kDa subunit, putative	EHI_136170	0.0290807	0.0796902	4.43414	26.4425	21.4067	26.726	21.3592	26.2643	23.3645	91200000	2780000	111000000	2690000	80600000	10800000					6	10.5	10.5	10.5	86.77	0	12.413	4	1	4	1	5	3	C4M297	1227	>tr|C4M297|C4M297_ENTHI Cleavage and polyadenylation specificity factor 73 kDa subunit, putative OS=Entamoeba histolytica OX=5759 GN=EHI_136170 PE=4 SV=1
C4LUQ2	Glucosidase, putative	EHI_023430	0.00878031	0.0559259	4.43008	30.3303	25.0854	29.6005	25.417	29.196	25.3342	1350000000	35600000	814000000	44800000	615000000	42300000					16	17.7	17.7	17.7	100.11	0	44.177	14	7	13	5	13	6	C4LUQ2	454	>tr|C4LUQ2|C4LUQ2_ENTHI Glucosidase, putative OS=Entamoeba histolytica OX=5759 GN=EHI_023430 PE=3 SV=1
C4M944	Uncharacterized protein	EHI_083600	0.00367546	0.0496409	4.42962	27.8799	23.3511	26.6458	21.8073	26.4831	22.5615	247000000	10700000	105000000	3670000	93800000	6190000			+	Plus DTT_Minus DTT	2	14.2	14.2	14.2	23.613	0	17.613	2	1	2	1	2	1	C4M944	1863	>tr|C4M944|C4M944_ENTHI Uncharacterized protein OS=Entamoeba histolytica OX=5759 GN=EHI_083600 PE=2 SV=1
CON__P15497			0.0231984	0.0729773	3.03693	27.9977	25.6237	28.9622	25.0148	28.4785	25.6891	268000000	51700000	523000000	33900000	374000000	54100000		+			9	38.9	38.9	38.9	30.276	0	21.046	5	6	7	4	6	5	CON__P15497	2089	>P15497 SWISS-PROT:P15497 (Bos taurus) Apolipoprotein A-I precursor
C4M7G3	Protein kinase, putative	EHI_158590	0.0127725	0.0620854	4.42411	28.8203	23.4041	27.1312	23.0409	27.9146	24.1488	474000000	11100000	147000000	8630000	253000000	18600000					9	13.5	13.5	13.5	77.076	0	26.289	6	1	5	1	6	2	C4M7G3	1718	>tr|C4M7G3|C4M7G3_ENTHI Protein kinase, putative OS=Entamoeba histolytica OX=5759 GN=EHI_158590 PE=4 SV=1
C4LVA8	Uncharacterized protein	EHI_196900	0.0709194	0.131295	4.42308	25.9066	19	25.2353	21.895	24.558	21.5356	62900000	0	39500000	3900000	24700000	3040000	+				1	3.3	3.3	3.3	41.925	1	-2	1	0	1	1	1	1	C4LVA8	514	>tr|C4LVA8|C4LVA8_ENTHI Uncharacterized protein OS=Entamoeba histolytica OX=5759 GN=EHI_196900 PE=4 SV=1
C4LYD4	Uncharacterized protein	EHI_007970	0.0234366	0.0731721	4.41644	31.6713	25.8811	30.3303	26.5255	29.9539	26.2996	3420000000	61800000	1350000000	96600000	1040000000	82600000					22	34.8	34.8	34.8	72.282	0	77.405	21	10	17	11	16	9	C4LYD4	846	>tr|C4LYD4|C4LYD4_ENTHI Uncharacterized protein OS=Entamoeba histolytica OX=5759 GN=EHI_007970 PE=4 SV=1
C4M137	Coronin	EHI_105330	0.0449551	0.0988214	4.41439	24.4614	19	24.3031	19	23.6971	21.2185	23100000	0	20700000	0	13600000	2440000	+				1	11.8	1.8	1.8	51.783	1	-2	1	0	1	0	1	1	C4M137	1119	>tr|C4M137|C4M137_ENTHI Coronin OS=Entamoeba histolytica OX=5759 GN=EHI_105330 PE=3 SV=1
C4LU25	Glycerophosphoryl diester phosphodiesterase, putative	EHI_068320	0.0244561	0.0747773	4.41014	31.3033	25.5463	30.3515	26.2679	30.0217	26.632	2649999872	49000000	1370000000	80800000	1090000000	104000000					14	35.6	35.6	35.6	45.244	0	31.651	14	8	13	9	13	9	C4LU25	379	>tr|C4LU25|C4LU25_ENTHI Glycerophosphoryl diester phosphodiesterase, putative OS=Entamoeba histolytica OX=5759 GN=EHI_068320 PE=4 SV=1
Q1EQ43	EhEmp24A	EHI_058320	0.0574198	0.114378	4.40481	29.1937	22.632	28.2308	24.4984	27.6798	24.7594	614000000	6500000	315000000	23700000	215000000	28400000					3	15.9	15.9	15.9	23.518	0	15.084	3	2	3	3	3	3	Q1EQ43	2172	>tr|Q1EQ43|Q1EQ43_ENTHI EhEmp24A OS=Entamoeba histolytica OX=5759 GN=EHI_058320 PE=3 SV=1
C4LXD1	Uncharacterized protein	EHI_098510	0.0323082	0.0830624	4.40224	32.6088	26.5898	31.6066	28.1263	31.3463	27.6389	6550000128	101000000	3270000128	293000000	2729999872	209000000					54	33.7	33.7	23	187.93	0	258.19	47	18	42	27	46	21	C4LXD1	750	>tr|C4LXD1|C4LXD1_ENTHI Uncharacterized protein OS=Entamoeba histolytica OX=5759 GN=EHI_098510 PE=4 SV=1
C4MBH7	Uncharacterized protein	EHI_029730	0.185644	0.265083	4.38878	26.0609	19	25.1055	19	19	19	70000000	0	36100000	0	0	0	+				1	1.8	1.8	1.8	98.228	1	-2	1	0	1	0	0	0	C4MBH7	2028	>tr|C4MBH7|C4MBH7_ENTHI Uncharacterized protein OS=Entamoeba histolytica OX=5759 GN=EHI_029730 PE=4 SV=1
C4LT02	40S ribosomal protein S3, putative	EHI_146340	0.0104907	0.0590501	4.38719	33.5754	28.5315	33.5641	28.965	32.9677	29.4492	12800000000	388000000	12700000256	524000000	8400000000	733000000					28	71.3	71.3	71.3	26.934	0	90.424	25	18	28	16	26	19	C4LT02	269	>tr|C4LT02|C4LT02_ENTHI 40S ribosomal protein S3, putative OS=Entamoeba histolytica OX=5759 GN=EHI_146340 PE=2 SV=1
Q5NSZ2	Rab family GTPase (Fragment)	EhRabX24	0.102817	0.171541	4.38298	26.5536	21.1519	25.3645	19	24.2535	22.8708	98500000	2330000	43200000	0	20000000	7670000					2	9.4	9.4	9.4	22.435	0.0012723	2.6556	2	1	2	0	2	2	Q5NSZ2	2254	>tr|Q5NSZ2|Q5NSZ2_ENTHI Rab family GTPase (Fragment) OS=Entamoeba histolytica OX=5759 GN=EhRabX24 PE=3 SV=1
C4M6A5	Uncharacterized protein	EHI_082540	0.0593874	0.116732	4.38071	30.6629	24.0609	29.3536	25.8623	28.4976	25.4488	1700000000	17500000	686000000	61000000	379000000	45800000					11	10.6	10.6	10.6	125.73	0	88.001	11	2	7	6	6	4	C4M6A5;B1N3T2	1614	>tr|C4M6A5|C4M6A5_ENTHI Uncharacterized protein OS=Entamoeba histolytica OX=5759 GN=EHI_082540 PE=4 SV=1
C4LT45	Uncharacterized protein	EHI_148770	0.138555	0.21477	4.37612	27.019	19	26.0254	23.2961	25.1293	22.7492	136000000	0	68300000	10300000	36700000	7050000					4	2.2	2.2	2.2	287.43	0	7.3053	4	0	3	1	3	1	C4LT45	283	>tr|C4LT45|C4LT45_ENTHI Uncharacterized protein OS=Entamoeba histolytica OX=5759 GN=EHI_148770 PE=4 SV=1
C4LUG7	Uncharacterized protein	EHI_049660	0.0804532	0.143235	4.37474	28.0243	21.2477	27.0609	22.9298	26.2856	24.0691	273000000	2490000	140000000	7990000	81800000	17600000					4	13.3	13.3	13.3	38.609	0	9.7535	4	1	3	1	2	2	C4LUG7	427	>tr|C4LUG7|C4LUG7_ENTHI Uncharacterized protein OS=Entamoeba histolytica OX=5759 GN=EHI_049660 PE=3 SV=1
C4M915	Uncharacterized protein	EHI_192750	0.057902	0.114927	4.37325	26.1115	20.1206	23.8576	19	23.7389	21.4676	72500000	1140000	15200000	0	14000000	2900000					2	4.1	4.1	4.1	59.745	0.0012121	2.2709	2	1	1	0	1	1	C4M915	1852	>tr|C4M915|C4M915_ENTHI Uncharacterized protein OS=Entamoeba histolytica OX=5759 GN=EHI_192750 PE=4 SV=1
C4M0B4	HEAT repeat domain containing protein	EHI_064450	0.0345072	0.0855011	4.37225	29.9259	24.002	29.3239	26.2571	29.2979	25.1719	1020000000	16800000	672000000	80200000	660000000	37800000					14	17.4	17.4	17.4	119.95	0	99.372	11	4	13	7	14	5	C4M0B4	1042	>tr|C4M0B4|C4M0B4_ENTHI HEAT repeat domain containing protein OS=Entamoeba histolytica OX=5759 GN=EHI_064450 PE=4 SV=1
C4MAU5	DNA-directed DNA polymerase	EHI_132860	0.184782	0.265083	4.36151	25.1757	19	19	19	25.9088	19	37900000	0	0	0	63000000	0					2	2.2	2.2	2.2	129.25	0.0059524	1.4614	1	0	0	0	1	0	C4MAU5	1981	>tr|C4MAU5|C4MAU5_ENTHI DNA-directed DNA polymerase OS=Entamoeba histolytica OX=5759 GN=EHI_132860 PE=3 SV=1
C4LU78	Protein kinase domain containing protein	EHI_110250	0.013816	0.0625652	4.35968	26.2408	21.4626	26.0914	21.1206	26.0914	22.7614	79300000	2890000	71500000	2280000	71500000	7110000					4	5.1	5.1	5.1	71.518	0	8.7323	3	1	4	1	4	2	C4LU78	399	>tr|C4LU78|C4LU78_ENTHI Protein kinase domain containing protein OS=Entamoeba histolytica OX=5759 GN=EHI_110250 PE=4 SV=1
CON__Q29443;CON__Q0IIK2			0.0241788	0.0743372	5.21914	31.7211	26.3014	30.9045	24.3645	30.5481	26.8504	3540000000	82700000	2010000000	21600000	1570000000	121000000		+			30	46.3	46.3	45.1	75.829	0	119.66	27	15	25	4	23	14	CON__Q29443;CON__Q0IIK2	2101	>Q29443 SWISS-PROT:Q29443 Serotransferrin - Bos taurus (Bovine).;>Q0IIK2 TREMBL:Q0IIK2 (Bos taurus) Transferrin
C4M1U4	Importin alpha, putative	EHI_027580	0.00898698	0.0559259	4.35071	23.5983	19	23.9134	19	22.5404	19	12700000	0	15800000	0	6100000	0					1	2.2	2.2	2.2	55.556	0.0040138	1.8845	1	0	1	0	1	0	C4M1U4	1191	>tr|C4M1U4|C4M1U4_ENTHI Importin alpha, putative OS=Entamoeba histolytica OX=5759 GN=EHI_027580 PE=4 SV=1
C4M2N0	Tubulin alpha chain	EHI_005950	0.025776	0.075898	4.34654	31.0349	25.3545	29.6697	26.4202	29.9117	25.8019	2200000000	42900000	854000000	89800000	1010000000	58500000					17	43.7	43.7	10.8	50.259	0	160.64	13	6	13	8	13	8	C4M2N0	1261	>tr|C4M2N0|C4M2N0_ENTHI Tubulin alpha chain OS=Entamoeba histolytica OX=5759 GN=EHI_005950 PE=3 SV=1
C4LYR0	Thioredoxin	EHI_004490	0.0170149	0.0659748	4.34449	33.4334	27.965	32.8829	28.8974	32.3088	28.7292	11600000000	262000000	7920000000	500000000	5320000000	445000000					9	79.6	79.6	79.6	11.632	0	131.8	9	7	9	6	9	4	C4LYR0	890	>tr|C4LYR0|C4LYR0_ENTHI Thioredoxin OS=Entamoeba histolytica OX=5759 GN=EHI_004490 PE=3 SV=1
C4LSG3	DEAD/DEAH box helicase, putative	EHI_151190	0.192162	0.267372	4.34291	26.4707	19	24.558	19	19	19	93000000	0	24700000	0	0	0					4	7.4	7.4	7.4	58.004	0	3.1321	3	0	2	0	1	0	C4LSG3	205	>tr|C4LSG3|C4LSG3_ENTHI DEAD/DEAH box helicase, putative OS=Entamoeba histolytica OX=5759 GN=EHI_151190 PE=4 SV=1
C4LVW1	Oxidoreductase, putative	EHI_125740	0.00581913	0.05403	4.34066	27.8974	23.1749	28.5165	23.895	27.9316	24.2535	250000000	9470000	384000000	15600000	256000000	20000000					4	13	13	13	35.573	0	7.049	3	2	4	3	4	2	C4LVW1	589	>tr|C4LVW1|C4LVW1_ENTHI Oxidoreductase, putative OS=Entamoeba histolytica OX=5759 GN=EHI_125740 PE=4 SV=1
C4M1X1	tRNA-dihydrouridine synthase	EHI_164780	0.0162892	0.0656574	4.33355	26.1946	20.7471	25.1757	21.2989	24.7389	21.0625	76800000	1760000	37900000	2580000	28000000	2190000					1	2.9	2.9	2.9	39.251	0	4.1549	1	1	1	1	1	1	C4M1X1	1196	>tr|C4M1X1|C4M1X1_ENTHI tRNA-dihydrouridine synthase OS=Entamoeba histolytica OX=5759 GN=EHI_164780 PE=3 SV=1
C4LZ48	Vesicular integral membrane protein VIP36, putative	EHI_104370	0.191456	0.267137	4.3295	19	19	26.4073	19	24.5812	19	0	0	89000000	0	25100000	0					2	5	5	5	43.235	0.0029138	2.0061	0	0	2	0	1	0	C4LZ48	927	>tr|C4LZ48|C4LZ48_ENTHI Vesicular integral membrane protein VIP36, putative OS=Entamoeba histolytica OX=5759 GN=EHI_104370 PE=4 SV=1
C4M5F3	GTP-binding protein, putative	EHI_058460	0.183602	0.265083	4.32788	25.5926	19	25.391	19	19	19	50600000	0	44000000	0	0	0					3	9.6	9.6	9.6	40.686	0	7.7461	2	0	2	0	1	0	C4M5F3	1537	>tr|C4M5F3|C4M5F3_ENTHI GTP-binding protein, putative OS=Entamoeba histolytica OX=5759 GN=EHI_058460 PE=3 SV=1
C4LVW6;C4LUW1	Chaperonin-containing TCP-1, zeta subunit, putative;Uncharacterized protein	EHI_125800;EHI_178980	0.0174878	0.0664316	4.32668	33.7047	28.2262	32.7231	28.8564	32.3672	28.7325	14000000000	314000000	7089999872	486000000	5539999744	446000000					36	61.7	61.7	61.7	59.913	0	220.45	34	19	34	20	34	21	C4LVW6;C4LUW1	591	>tr|C4LVW6|C4LVW6_ENTHI Chaperonin-containing TCP-1, zeta subunit, putative OS=Entamoeba histolytica OX=5759 GN=EHI_125800 PE=3 SV=1;>tr|C4LUW1|C4LUW1_ENTHI Uncharacterized protein OS=Entamoeba histolytica OX=5759 GN=EHI_178980 PE=3 SV=1
C4M0D6	Autophagy protein apg7, putative	EHI_064700	0.025776	0.075898	4.32437	29.995	24.5225	29.1386	24.6703	28.5278	25.4953	1070000000	24100000	591000000	26700000	387000000	47300000					14	24.8	24.8	24.8	65.407	0	61.193	12	6	12	5	9	8	C4M0D6	1050	>tr|C4M0D6|C4M0D6_ENTHI Autophagy protein apg7, putative OS=Entamoeba histolytica OX=5759 GN=EHI_064700 PE=4 SV=1
C4M8H1;B1N4N4	Uncharacterized protein;Caldesmon, putative	EHI_063040;EHI_019640	0.185708	0.265083	4.31937	19	19	25.002	19	25.9562	19	0	0	33600000	0	65100000	0					2	4.3	4.3	4.3	86.771	0	17.38	0	0	1	0	2	0	C4M8H1;B1N4N4	1799	>tr|C4M8H1|C4M8H1_ENTHI Uncharacterized protein OS=Entamoeba histolytica OX=5759 GN=EHI_063040 PE=4 SV=1;>tr|B1N4N4|B1N4N4_ENTHI Caldesmon, putative OS=Entamoeba histolytica OX=5759 GN=EHI_019640 PE=4 SV=1
C4M377	Uncharacterized protein	EHI_086220	0.202899	0.277629	4.31492	26.9088	19	19	19	24.0359	19	126000000	0	0	0	17200000	0					2	6.2	6.2	6.2	62.003	0	10.448	2	0	0	0	1	0	C4M377	1323	>tr|C4M377|C4M377_ENTHI Uncharacterized protein OS=Entamoeba histolytica OX=5759 GN=EHI_086220 PE=4 SV=1
C4M9W1	Ras guanine nucleotide exchange factor, putative	EHI_113430	0.00654481	0.0548842	4.31461	26.4692	21.6757	26.4723	21.953	25.8904	22.2593	92900000	3350000	93100000	4060000	62200000	5020000					3	7.3	7.3	7.3	51.155	0	11.772	3	1	2	1	2	1	C4M9W1	1919	>tr|C4M9W1|C4M9W1_ENTHI Ras guanine nucleotide exchange factor, putative OS=Entamoeba histolytica OX=5759 GN=EHI_113430 PE=4 SV=1
C4LTS5	Uncharacterized protein	EHI_050520	0.0201074	0.069946	4.30647	33.2897	27.7958	31.8608	27.8385	31.9045	28.5014	10499999744	233000000	3900000000	240000000	4020000000	380000000					13	50.7	50.7	50.7	25.078	0	173.82	13	8	12	8	12	9	C4LTS5	346	>tr|C4LTS5|C4LTS5_ENTHI Uncharacterized protein OS=Entamoeba histolytica OX=5759 GN=EHI_050520 PE=2 SV=1
C4M2E3	3-ketoacyl-CoA synthase	EHI_158240	0.0332184	0.0844901	4.30505	34.1679	28.3452	33.4581	29.4473	32.7946	29.7129	19299999744	341000000	11800000512	732000000	7449999872	880000000					35	58.4	58.4	54.5	56.511	0	323.31	34	18	34	23	33	21	C4M2E3;B1N502;C4LZ15	1239	>tr|C4M2E3|C4M2E3_ENTHI 3-ketoacyl-CoA synthase OS=Entamoeba histolytica OX=5759 GN=EHI_158240 PE=3 SV=1
C4M745	Uncharacterized protein	EHI_192040	0.189327	0.265917	4.30426	26.2317	19	19	19	24.6811	19	78800000	0	0	0	26900000	0					2	14.4	14.4	14.4	19.44	0	5.0073	2	0	0	0	2	0	C4M745	1679	>tr|C4M745|C4M745_ENTHI Uncharacterized protein OS=Entamoeba histolytica OX=5759 GN=EHI_192040 PE=4 SV=1
C4LWM6	Phospholipase B-like	EHI_069380	0.225038	0.300993	4.30354	27.5969	19	26.6458	22.3321	19	19	203000000	0	105000000	5280000	0	0	+				1	2.9	2.9	2.9	60.97	1	-2	1	0	1	1	0	0	C4LWM6	671	>tr|C4LWM6|C4LWM6_ENTHI Phospholipase B-like OS=Entamoeba histolytica OX=5759 GN=EHI_069380 PE=3 SV=1
C4LW36	Chromodomain-helicase-DNA-binding protein, putative	EHI_141900	0.023732	0.0731721	4.30311	26.8974	21.7756	26.6998	21.8764	26.2463	23.2821	125000000	3590000	109000000	3850000	79600000	10200000	+				1	0.6	0.6	0.6	148.19	1	-2	1	1	1	1	1	1	C4LW36	615	>tr|C4LW36|C4LW36_ENTHI Chromodomain-helicase-DNA-binding protein, putative OS=Entamoeba histolytica OX=5759 GN=EHI_141900 PE=4 SV=1
C4LVN8	Eukaryotic translation initiation factor 5A	EHI_186480	0.00472485	0.0515735	4.30187	29.8916	25.0975	29.5033	25.1604	29.267	25.4984	996000000	35900000	761000000	37500000	646000000	47400000					2	49	8.3	8.3	17.132	0	8.5922	2	1	2	1	2	1	C4LVN8	560	>tr|C4LVN8|C4LVN8_ENTHI Eukaryotic translation initiation factor 5A OS=Entamoeba histolytica OX=5759 GN=EHI_186480 PE=3 SV=1
C4M9W7	Uncharacterized protein	EHI_129340	0.0954786	0.161842	4.29194	29.2054	22.3101	27.9595	23.9406	27.4073	25.4457	619000000	5200000	261000000	16100000	178000000	45700000					8	14.6	14.6	14.6	64.504	0	16.365	8	2	7	2	5	4	C4M9W7	1922	>tr|C4M9W7|C4M9W7_ENTHI Uncharacterized protein OS=Entamoeba histolytica OX=5759 GN=EHI_129340 PE=4 SV=1
C4LWV7	Serine/threonine-protein phosphatase	EHI_199120	0.0134339	0.0621874	4.28458	28.341	24.3031	29.5109	24.2607	28.0762	24.5105	340000000	20700000	765000000	20100000	283000000	23900000					12	23.4	23.4	23.4	61.291	0	22.572	8	2	11	2	7	3	C4LWV7	695	>tr|C4LWV7|C4LWV7_ENTHI Serine/threonine-protein phosphatase OS=Entamoeba histolytica OX=5759 GN=EHI_199120 PE=3 SV=1
C4M2N2	Uncharacterized protein	EHI_005970	0.0107903	0.0599791	4.28291	30.6713	25.8288	30.362	25.7517	30.1604	26.7645	1710000000	59600000	1380000000	56500000	1200000000	114000000					8	82.1	82.1	82.1	11.928	0	60.556	7	4	7	4	7	4	C4M2N2	1263	>tr|C4M2N2|C4M2N2_ENTHI Uncharacterized protein OS=Entamoeba histolytica OX=5759 GN=EHI_005970 PE=4 SV=1
C4LZH6	Thioredoxin, putative	EHI_124400	0.0126139	0.0620854	4.27949	28.3324	23.2375	27.9484	23.6209	27.5014	24.0854	338000000	9890000	259000000	12900000	190000000	17800000					4	39.2	39.2	39.2	14.638	0	7.8083	4	2	4	2	4	3	C4LZH6	962	>tr|C4LZH6|C4LZH6_ENTHI Thioredoxin, putative OS=Entamoeba histolytica OX=5759 GN=EHI_124400 PE=4 SV=1
C4LTL7	Rho family GTPase	EHI_012240	0.0830184	0.146283	4.27935	24.2961	20.8113	25.8504	19	24.1871	21.6843	20600000	1840000	60500000	0	19100000	3370000					2	54.5	10	10	22.334	0	3.9458	1	1	2	0	1	1	C4LTL7	326	>tr|C4LTL7|C4LTL7_ENTHI Rho family GTPase OS=Entamoeba histolytica OX=5759 GN=EHI_012240 PE=3 SV=1
C4LUK9	LIM zinc finger domain containing protein	EHI_022960	0.0587982	0.116086	4.27918	30.6458	24.5225	29.4688	25.1174	28.8445	26.4815	1680000000	24100000	743000000	36400000	482000000	93700000					12	37	37	37	51.56	0	86.754	11	4	10	4	10	4	C4LUK9	441	>tr|C4LUK9|C4LUK9_ENTHI LIM zinc finger domain containing protein OS=Entamoeba histolytica OX=5759 GN=EHI_022960 PE=3 SV=1
C4M620	DEAD/DEAH box helicase, putative	EHI_125170	0.00168395	0.0487947	4.27714	23.2096	19	23.6096	19	23.0122	19	9700000	0	12800000	0	8460000	0			+	Plus DTT_Minus DTT	1	0.9	0.9	0.9	122.63	0.0089521	1.3209	1	0	1	0	1	0	C4M620	1591	>tr|C4M620|C4M620_ENTHI DEAD/DEAH box helicase, putative OS=Entamoeba histolytica OX=5759 GN=EHI_125170 PE=4 SV=1
C4M1N1	Calcium-binding protein, putative	EHI_134020	0.184018	0.265083	4.27143	25.6348	19	25.1795	19	19	19	52100000	0	38000000	0	0	0	+				1	2.7	2.7	2.7	72.302	1	-2	1	0	1	0	0	0	C4M1N1	1173	>tr|C4M1N1|C4M1N1_ENTHI Calcium-binding protein, putative OS=Entamoeba histolytica OX=5759 GN=EHI_134020 PE=4 SV=1
C4LZU7	Autophagocytosis protein, putative	EHI_194330	0.0811363	0.143991	4.27005	29.2239	22.3936	27.7064	25.0732	27.8081	24.4614	627000000	5510000	219000000	35300000	235000000	23100000					9	31.3	31.3	31.3	30.615	0	30.301	8	1	7	3	9	3	C4LZU7	990	>tr|C4LZU7|C4LZU7_ENTHI Autophagocytosis protein, putative OS=Entamoeba histolytica OX=5759 GN=EHI_194330 PE=2 SV=1
C4LT37	Uncharacterized protein	EHI_148670	0.0184887	0.067458	4.26542	27.0505	21.9672	26.6998	22.1111	25.9473	22.823	139000000	4100000	109000000	4530000	64700000	7420000					3	13.6	13.6	13.6	31.999	0	10.282	3	1	2	1	2	1	C4LT37	278	>tr|C4LT37|C4LT37_ENTHI Uncharacterized protein OS=Entamoeba histolytica OX=5759 GN=EHI_148670 PE=4 SV=1
C4M2A1	Soluble NSF attachment protein gamma isoform, putative	EHI_136210	0.0594729	0.116738	4.26072	28.8355	25.228	28.8504	22.4651	28.3239	25.5345	479000000	39300000	484000000	5790000	336000000	48600000					9	22.5	22.5	22.5	40.824	0	17.568	8	8	7	1	9	6	C4M2A1	1230	>tr|C4M2A1|C4M2A1_ENTHI Soluble NSF attachment protein gamma isoform, putative OS=Entamoeba histolytica OX=5759 GN=EHI_136210 PE=3 SV=1
C4LTI9	Serine/threonine-protein phosphatase	EHI_011950	0.0737841	0.134703	4.25503	27.7325	21.0559	26.574	23.848	26.6865	23.3239	223000000	2180000	99900000	15100000	108000000	10500000					5	19.1	19.1	19.1	35.185	0	28.58	5	1	4	4	4	3	C4LTI9	319	>tr|C4LTI9|C4LTI9_ENTHI Serine/threonine-protein phosphatase OS=Entamoeba histolytica OX=5759 GN=EHI_011950 PE=3 SV=1
C4M1D3	Uncharacterized protein	EHI_170110	0.00475632	0.0515735	4.25257	22.6671	19	23.4923	19	23.5983	19	6660000	0	11800000	0	12700000	0					1	12.6	12.6	12.6	14.962	0	24.483	1	0	1	0	1	0	C4M1D3	1140	>tr|C4M1D3|C4M1D3_ENTHI Uncharacterized protein OS=Entamoeba histolytica OX=5759 GN=EHI_170110 PE=4 SV=1
C4LYM5	Uncharacterized protein	EHI_118770	0.00070991	0.0487947	4.25021	28.5463	24.2021	27.8741	23.4923	26.726	22.7013	392000000	19300000	246000000	11800000	111000000	6820000			+	Plus DTT_Minus DTT	5	7.8	7.8	7.8	92.418	0	17.182	4	2	5	2	4	3	C4LYM5	876	>tr|C4LYM5|C4LYM5_ENTHI Uncharacterized protein OS=Entamoeba histolytica OX=5759 GN=EHI_118770 PE=4 SV=1
C4M6D2	Uncharacterized protein	EHI_142960	0.069199	0.128802	4.24827	28.6424	22.6119	27.5014	22.8054	27.0914	25.0732	419000000	6410000	190000000	7330000	143000000	35300000					5	13.1	13.1	13.1	60.57	0	12.486	4	1	4	1	4	4	C4M6D2	1621	>tr|C4M6D2|C4M6D2_ENTHI Uncharacterized protein OS=Entamoeba histolytica OX=5759 GN=EHI_142960 PE=4 SV=1
C4LVG7	EF-hand calcium-binding domain containing protein	EHI_197510	0.0158702	0.0652032	4.2471	26.632	21.3592	26.5105	23.0772	26.5565	22.5213	104000000	2690000	95600000	8850000	98700000	6020000					4	15.2	15.2	15.2	29.932	0	5.3225	2	1	3	2	4	2	C4LVG7	532	>tr|C4LVG7|C4LVG7_ENTHI EF-hand calcium-binding domain containing protein OS=Entamoeba histolytica OX=5759 GN=EHI_197510 PE=2 SV=1
C4M3C4	Protein kinase, putative	EHI_053060	0.0422312	0.0949883	4.24178	32.025	26.0629	30.5296	26.6865	30.3515	27.4314	4369999872	70100000	1550000000	108000000	1370000000	181000000					23	48.2	48.2	46.4	50.001	0	116.69	22	10	19	8	20	12	C4M3C4;Q761X1	1332	>tr|C4M3C4|C4M3C4_ENTHI Protein kinase, putative OS=Entamoeba histolytica OX=5759 GN=EHI_053060 PE=3 SV=1
C4LTW7	CXXC-rich protein	EHI_050970	0.0130461	0.0620854	4.24002	23.9847	19	23.417	19	22.3184	19	16600000	0	11200000	0	5230000	0					1	1.8	1.8	1.8	67.478	0.0011926	2.1462	1	0	1	0	1	0	C4LTW7	362	>tr|C4LTW7|C4LTW7_ENTHI CXXC-rich protein OS=Entamoeba histolytica OX=5759 GN=EHI_050970 PE=4 SV=1
C4LYE4;B1N5S4;B1N4D5	PH domain-containing protein;Uncharacterized protein	EHI_008090;EHI_168500	0.0252015	0.0754062	4.23923	29.3303	23.848	28.7802	24.6595	27.9484	24.8336	675000000	15100000	461000000	26500000	259000000	29900000					10	23	23	21.4	54.015	0	26.723	10	3	8	4	7	4	C4LYE4;B1N5S4;B1N4D5	849	>tr|C4LYE4|C4LYE4_ENTHI PH domain-containing protein OS=Entamoeba histolytica OX=5759 GN=EHI_008090 PE=2 SV=1;>tr|B1N5S4|B1N5S4_ENTHI Uncharacterized protein OS=Entamoeba histolytica OX=5759 GN=EHI_168500 PE=4 SV=1;>tr|B1N4D5|B1N4D5_ENTHI Uncharacterized p
C4LT08	C2 domain containing protein	EHI_148380	0.029208	0.0796902	4.23879	25.4551	19.7602	23.8288	20.5545	22.7471	19	46000000	888000	14900000	1540000	7040000	0					2	5.2	5.2	5.2	51.375	0.0017647	2.0842	2	1	1	1	1	0	C4LT08	272	>tr|C4LT08|C4LT08_ENTHI C2 domain containing protein OS=Entamoeba histolytica OX=5759 GN=EHI_148380 PE=4 SV=1
C4M1B3	Uncharacterized protein	EHI_169900	0.0370515	0.0877893	4.22452	29.1819	23.3376	28.4154	24.6375	27.9372	24.8858	609000000	10600000	358000000	26100000	257000000	31000000					2	6.8	6.8	6.8	21.442	0	12.168	2	2	2	2	2	2	C4M1B3	1135	>tr|C4M1B3|C4M1B3_ENTHI Uncharacterized protein OS=Entamoeba histolytica OX=5759 GN=EHI_169900 PE=4 SV=1
C4LWS5	Alanine--tRNA ligase	EHI_198790	0.0178	0.0664714	4.22341	32.9277	27.5682	32.025	28.267	31.6839	28.1312	8169999872	199000000	4369999872	323000000	3449999872	294000000					46	48.5	48.5	48.5	111.03	0	178.66	44	25	39	25	41	23	C4LWS5	686	>tr|C4LWS5|C4LWS5_ENTHI Alanine--tRNA ligase OS=Entamoeba histolytica OX=5759 GN=EHI_198790 PE=3 SV=1
B1N2J5	p-glycoprotein 6, putative	EHI_050640	0.0273339	0.0784136	4.21514	27.8799	22.2989	27.7958	24.6096	25.8974	22.019	247000000	5160000	233000000	25600000	62500000	4250000					3	28.2	7.8	7.8	46.176	0	25.002	2	1	1	3	1	1	B1N2J5	17	>tr|B1N2J5|B1N2J5_ENTHI p-glycoprotein 6, putative OS=Entamoeba histolytica OX=5759 GN=EHI_050640 PE=4 SV=1
C4M0W3	Lysozyme, putative	EHI_015250	0.18448	0.265083	4.21325	19	19	25.6292	19	25.0105	19	0	0	51900000	0	33800000	0	+				1	1	1	1	81.51	1	-2	0	0	1	0	1	0	C4M0W3	1096	>tr|C4M0W3|C4M0W3_ENTHI Lysozyme, putative OS=Entamoeba histolytica OX=5759 GN=EHI_015250 PE=3 SV=1
C4M7W6	RNA methyltransferase, putative	EHI_047740	0.0874435	0.152037	4.2113	27.3662	23.9043	25.8044	19	25.7846	23.417	173000000	15700000	58600000	0	57800000	11200000					3	6.5	6.5	6.5	54.679	0	7.607	3	1	2	0	3	1	C4M7W6	1748	>tr|C4M7W6|C4M7W6_ENTHI RNA methyltransferase, putative OS=Entamoeba histolytica OX=5759 GN=EHI_047740 PE=3 SV=1
C4M918	Uncharacterized protein	EHI_192790	0.0486017	0.103473	4.20531	23.8858	21.6051	24.2021	19	24.1332	19	15500000	3190000	19300000	0	18400000	0	+				1	4.9	4.9	4.9	17.094	1	-2	1	1	1	0	1	0	C4M918	1854	>tr|C4M918|C4M918_ENTHI Uncharacterized protein OS=Entamoeba histolytica OX=5759 GN=EHI_192790 PE=4 SV=1
C4M3Z7	Ran GTPase-activating protein, putative	EHI_185290	0.0925299	0.158167	4.2023	25.7103	22.6453	25.9406	19	26.0813	23.48	54900000	6560000	64400000	0	71000000	11700000					3	16.6	16.6	10.7	19.612	0	3.5321	2	2	3	1	3	2	C4M3Z7	1406	>tr|C4M3Z7|C4M3Z7_ENTHI Ran GTPase-activating protein, putative OS=Entamoeba histolytica OX=5759 GN=EHI_185290 PE=4 SV=1
C4M8W3	Glycerophosphoryl diester phosphodiesterase, putative	EHI_113970	0.0306063	0.0815072	4.19951	31.8974	26.2874	30.9117	26.965	30.3828	27.341	4000000000	81900000	2020000000	131000000	1400000000	170000000					13	34.2	34.2	34.2	43.575	0	66.346	12	5	11	5	12	5	C4M8W3	1837	>tr|C4M8W3|C4M8W3_ENTHI Glycerophosphoryl diester phosphodiesterase, putative OS=Entamoeba histolytica OX=5759 GN=EHI_113970 PE=2 SV=1
C4LTX6	Pyruvate:ferredoxin oxidoreductase	EHI_051060	0.0343483	0.0854837	4.19763	39.4767	33.6839	38.2854	34.9591	37.9742	34.5002	765000024064	13799999488	335000010752	33400000512	269999996928	24299999232					136	78.5	78.5	78.5	127.63	0	323.31	133	79	133	97	129	88	C4LTX6	364	>tr|C4LTX6|C4LTX6_ENTHI Pyruvate:ferredoxin oxidoreductase OS=Entamoeba histolytica OX=5759 GN=EHI_051060 PE=4 SV=1
C4M184	Uncharacterized protein	EHI_188100	0.0340829	0.0852501	4.19731	28.4746	22.8014	26.7645	23.8191	26.0127	22.0393	373000000	7310000	114000000	14800000	67700000	4310000	+				1	4.3	4.3	4.3	45.48	1	-2	1	1	1	1	1	1	C4M184	1127	>tr|C4M184|C4M184_ENTHI Uncharacterized protein OS=Entamoeba histolytica OX=5759 GN=EHI_188100 PE=4 SV=1
C4MBR8	Serine-rich protein	EHI_116360	0.18493	0.265083	4.19672	25.6676	19	24.9225	19	19	19	53300000	0	31800000	0	0	0					1	6.9	6.9	6.9	24.719	0	4.3831	1	0	1	0	1	0	C4MBR8	2038	>tr|C4MBR8|C4MBR8_ENTHI Serine-rich protein OS=Entamoeba histolytica OX=5759 GN=EHI_116360 PE=4 SV=1
C4M300	Oxysterol binding protein, putative	EHI_074110	0.0584543	0.115674	4.19119	31.1052	24.8858	28.8887	26.2481	28.8623	25.1488	2310000128	31000000	497000000	79700000	488000000	37200000					16	34.3	34.3	34.3	56.893	0	98.531	15	5	13	7	13	4	C4M300	1303	>tr|C4M300|C4M300_ENTHI Oxysterol binding protein, putative OS=Entamoeba histolytica OX=5759 GN=EHI_074110 PE=4 SV=1
B1N2N4	Threonine ammonia-lyase	EhTD1	0.0327975	0.0838174	4.18919	32.4654	26.7771	31.1664	27.3662	30.7453	27.6663	5929999872	115000000	2409999872	173000000	1800000000	213000000					18	52	52	8	44.946	0	160.19	18	11	16	10	17	11	B1N2N4;B1N610	24	>tr|B1N2N4|B1N2N4_ENTHI Threonine ammonia-lyase OS=Entamoeba histolytica OX=5759 GN=EhTD1 PE=3 SV=1
C4M9R3	Ribosome biogenesis protein BMS1, putative	EHI_196410	0.021058	0.0702577	4.18663	25.7492	21.5404	25.3778	20.1332	24.8288	21.7223	56400000	3050000	43600000	1150000	29800000	3460000					3	3.1	3.1	3.1	111.93	0.0011947	2.1589	2	2	2	1	2	2	C4M9R3	1908	>tr|C4M9R3|C4M9R3_ENTHI Ribosome biogenesis protein BMS1, putative OS=Entamoeba histolytica OX=5759 GN=EHI_196410 PE=4 SV=1
C4M9D1	Uncharacterized protein	EHI_149860	0.0128304	0.0620854	4.17628	29.1065	24.1015	29.0686	24.895	28.4194	25.0691	578000000	18000000	563000000	31200000	359000000	35200000					13	23.2	23.2	23.2	75.756	0	48.961	11	5	12	5	12	7	C4M9D1	1884	>tr|C4M9D1|C4M9D1_ENTHI Uncharacterized protein OS=Entamoeba histolytica OX=5759 GN=EHI_149860 PE=3 SV=1
C4M577	LIM zinc finger domain containing protein	EHI_111790	0.00840561	0.0559259	4.17302	23.9225	19	22.9513	19	22.6453	19	15900000	0	8110000	0	6560000	0					1	6.8	6.8	6.8	18.696	0.0012188	2.2869	1	0	1	0	1	0	C4M577	1520	>tr|C4M577|C4M577_ENTHI LIM zinc finger domain containing protein OS=Entamoeba histolytica OX=5759 GN=EHI_111790 PE=4 SV=1
C4M5N4	Zinc finger protein, putative	EHI_122760	0.185009	0.265083	4.16791	19	19	25.632	19	24.8717	19	0	0	52000000	0	30700000	0	+				1	1.3	1.3	1.3	75.417	1	-2	0	0	1	0	1	0	C4M5N4	1555	>tr|C4M5N4|C4M5N4_ENTHI Zinc finger protein, putative OS=Entamoeba histolytica OX=5759 GN=EHI_122760 PE=4 SV=1
B1N3B2	LIM zinc finger domain containing protein	EHI_030800	0.0336526	0.0849509	4.16767	30.0217	24.4738	29.4234	25.2996	28.7195	25.8881	1090000000	23300000	720000000	41300000	442000000	62100000					7	40	40	40	16.433	0	23.484	7	3	6	4	6	5	B1N3B2	67	>tr|B1N3B2|B1N3B2_ENTHI LIM zinc finger domain containing protein OS=Entamoeba histolytica OX=5759 GN=EHI_030800 PE=4 SV=1
Q5FLW7	RNA helicase	LBA0416	0.0490875	0.103909	4.15926	28.1214	22.0854	26.1623	23.2679	26.1135	22.5662	292000000	4450000	75100000	10100000	72600000	6210000	+				1	2.4	2.4	2.4	51.835	1	-2	1	1	1	1	1	1	Q5FLW7	2237	>tr|Q5FLW7|Q5FLW7_LACAC RNA helicase OS=Lactobacillus acidophilus (strain ATCC 700396 / NCK56 / N2 / NCFM) OX=272621 GN=LBA0416 PE=4 SV=1
C4M359	Protein phosphatase, putative	EHI_086040	0.184726	0.265083	4.15778	19	19	25.5783	19	24.895	19	0	0	50100000	0	31200000	0					1	40.8	4.3	4.3	31.667	0	6.4673	0	0	1	0	1	0	C4M359	1319	>tr|C4M359|C4M359_ENTHI Protein phosphatase, putative OS=Entamoeba histolytica OX=5759 GN=EHI_086040 PE=3 SV=1
C4M6Q7	Uncharacterized protein	EHI_201280	0.0648625	0.124027	4.15774	23.9316	21.1765	25.3578	19	24.8623	21.502	16000000	2370000	43000000	0	30500000	2970000					3	9.3	9.3	9.3	44.857	0	4.9253	1	1	3	0	2	1	C4M6Q7	1650	>tr|C4M6Q7|C4M6Q7_ENTHI Uncharacterized protein OS=Entamoeba histolytica OX=5759 GN=EHI_201280 PE=4 SV=1
C4LUD7	Uncharacterized protein	EHI_049350	0.0210868	0.0702577	4.15622	30.0217	24.9495	29.651	25.2463	28.7613	25.7695	1090000000	32400000	843000000	39800000	455000000	57200000					8	15.4	15.4	15.4	61.948	0	20.391	7	4	8	4	8	4	C4LUD7	420	>tr|C4LUD7|C4LUD7_ENTHI Uncharacterized protein OS=Entamoeba histolytica OX=5759 GN=EHI_049350 PE=4 SV=1
B1N4S9;C4LX33	Uncharacterized protein	EHI_196510;EHI_159510	0.183626	0.265083	4.15543	19	19	25.341	19	25.1253	19	0	0	42500000	0	36600000	0	+				1	4.2	4.2	4.2	25.23	1	-2	0	0	1	0	1	0	B1N4S9;C4LX33	144	>tr|B1N4S9|B1N4S9_ENTHI Uncharacterized protein OS=Entamoeba histolytica OX=5759 GN=EHI_196510 PE=4 SV=1;>tr|C4LX33|C4LX33_ENTHI Uncharacterized protein OS=Entamoeba histolytica OX=5759 GN=EHI_159510 PE=4 SV=1
C4LSW2	Membrane-bound O-acyltransferase (MBOAT ) family protein	EHI_152790	0.212352	0.28739	4.15336	26.9316	19	19	19	23.5285	19	128000000	0	0	0	12100000	0					2	3.8	3.8	3.8	56.126	0.0012523	2.511	2	0	0	0	1	0	C4LSW2	254	>tr|C4LSW2|C4LSW2_ENTHI Membrane-bound O-acyltransferase (MBOAT ) family protein OS=Entamoeba histolytica OX=5759 GN=EHI_152790 PE=4 SV=1
C4LSS1	Choline/ethanolamine kinase, putative	EHI_152340	0.0028131	0.0487947	4.14893	29.5147	24.9672	29.5463	25.433	29.003	25.217	767000000	32800000	784000000	45300000	538000000	39000000			+	Plus DTT_Minus DTT	10	27.9	27.9	27.9	44.426	0	37.861	7	4	10	3	9	3	C4LSS1	243	>tr|C4LSS1|C4LSS1_ENTHI Choline/ethanolamine kinase, putative OS=Entamoeba histolytica OX=5759 GN=EHI_152340 PE=4 SV=1
C4M8H2	Elongation factor-2 kinase, putative	EHI_090240	0.0412746	0.0936803	4.14103	26.1719	21.0359	25.0691	22.6584	23.8764	19	75600000	2150000	35200000	6620000	15400000	0					2	5.5	5.5	5.5	46.084	0	5.2552	2	1	2	1	1	1	C4M8H2	1800	>tr|C4M8H2|C4M8H2_ENTHI Elongation factor-2 kinase, putative OS=Entamoeba histolytica OX=5759 GN=EHI_090240 PE=4 SV=1
C4M323	14-3-3 protein 1	EHI_025360	0.0165875	0.065918	4.14004	33.4581	28.3367	33.1438	29.104	32.648	29.389	11800000512	339000000	9489999872	577000000	6729999872	703000000					25	78.2	78.2	65.7	27.338	0	243.45	23	15	24	14	23	16	C4M323	1309	>tr|C4M323|C4M323_ENTHI 14-3-3 protein 1 OS=Entamoeba histolytica OX=5759 GN=EHI_025360 PE=2 SV=1
C4M3U3;C4LVS1	Phosphofructokinase, putative	EHI_163630;EHI_187040	0.00776719	0.0559259	4.13993	27.5014	22.6276	26.965	23.2006	26.6181	22.8365	190000000	6480000	131000000	9640000	103000000	7490000					4	15.3	10.9	10.9	48.123	0	24.011	4	1	3	1	2	1	C4M3U3;C4LVS1	575	>tr|C4M3U3|C4M3U3_ENTHI Phosphofructokinase, putative OS=Entamoeba histolytica OX=5759 GN=EHI_163630 PE=4 SV=1;>tr|C4LVS1|C4LVS1_ENTHI Phosphofructokinase, putative OS=Entamoeba histolytica OX=5759 GN=EHI_187040 PE=4 SV=1
Q5FII3	ABC transporter permease protein	LBA1679	0.0828453	0.146209	4.13989	25.6838	19	24.7129	21.8689	24.5105	21.6186	53900000	0	27500000	3830000	23900000	3220000					1	1.5	1.5	1.5	67.737	0.004548	1.7903	1	0	1	1	1	1	Q5FII3	2202	>tr|Q5FII3|Q5FII3_LACAC ABC transporter permease protein OS=Lactobacillus acidophilus (strain ATCC 700396 / NCK56 / N2 / NCFM) OX=272621 GN=LBA1679 PE=3 SV=1
C4M149	Uncharacterized protein	EHI_107080	0.0148353	0.0639185	4.13715	28.995	23.848	28.7453	24.9933	28.5898	25.0772	535000000	15100000	450000000	33400000	404000000	35400000					9	11.5	11.5	11.5	101.03	0	32.164	8	3	9	2	8	4	C4M149	1121	>tr|C4M149|C4M149_ENTHI Uncharacterized protein OS=Entamoeba histolytica OX=5759 GN=EHI_107080 PE=4 SV=1
C4M2Z5	Rap/Ran GTPase-activating protein, putative	EHI_074060	0.0214741	0.0709123	4.12263	26.002	20.6971	24.8576	21.6141	25.4202	21.6006	67200000	1700000	30400000	3210000	44900000	3180000					3	5.3	5.3	5.3	67.572	0.0012399	2.4426	3	1	2	1	3	1	C4M2Z5	1301	>tr|C4M2Z5|C4M2Z5_ENTHI Rap/Ran GTPase-activating protein, putative OS=Entamoeba histolytica OX=5759 GN=EHI_074060 PE=4 SV=1
C4LWJ6	LIM zinc finger domain containing protein	EHI_069060	0.0198883	0.0693758	4.12118	31.8792	26.6865	31.4919	27.4785	31.1604	28.003	3950000128	108000000	3020000000	187000000	2400000000	269000000					10	76.1	76.1	76.1	13.298	0	70.519	10	5	10	6	10	6	C4LWJ6	663	>tr|C4LWJ6|C4LWJ6_ENTHI LIM zinc finger domain containing protein OS=Entamoeba histolytica OX=5759 GN=EHI_069060 PE=4 SV=1
C4M4N3;B1N306;B1N3D6	Elongation factor 2	EHI_189490;EHI_166810	0.0170191	0.0659748	4.11948	37.2193	32.0117	36.7175	33.1084	36.2689	32.7272	160000000000	4329999872	112999997440	9260000256	82800001024	7110000128					73	71	71	71	93.4	0	323.31	69	47	70	53	69	49	C4M4N3;B1N306;B1N3D6	45	>tr|C4M4N3|C4M4N3_ENTHI Elongation factor 2 OS=Entamoeba histolytica OX=5759 GN=EHI_189490 PE=3 SV=1;>tr|B1N306|B1N306_ENTHI Elongation factor 2 OS=Entamoeba histolytica OX=5759 GN=EHI_166810 PE=3 SV=1;>tr|B1N3D6|B1N3D6_ENTHI Elongation factor 2 OS=Entamoe
C4M0E0	Uncharacterized protein	EHI_006550	0.00805624	0.0559259	4.11882	29.0164	24.7389	29.6492	24.9803	28.9146	25.5045	543000000	28000000	842000000	33100000	506000000	47600000					12	20.2	20.2	20.2	83.264	0	68.227	9	6	12	5	10	8	C4M0E0	1051	>tr|C4M0E0|C4M0E0_ENTHI Uncharacterized protein OS=Entamoeba histolytica OX=5759 GN=EHI_006550 PE=4 SV=1
C4M511	ATPase, AAA family protein	EHI_141040	0.0289042	0.0796383	4.11245	28.3109	22.9098	27.5754	24.6431	27.0296	23.0258	333000000	7880000	200000000	26200000	137000000	8540000					10	12.2	12.2	12.2	104.15	0	22.269	9	3	8	2	10	3	C4M511	1496	>tr|C4M511|C4M511_ENTHI ATPase, AAA family protein OS=Entamoeba histolytica OX=5759 GN=EHI_141040 PE=4 SV=1
C4M3X8;B1N3Q8	Serine/threonine protein phosphatase PP2A catalytic subunit, putative	EHI_200730	0.0404111	0.0921026	4.11018	29.5259	23.7182	27.7195	24.3239	27.9705	24.8433	773000000	13800000	221000000	21000000	263000000	30100000					1	4	4	4	36.984	0	6.0162	1	1	1	1	1	1	C4M3X8;B1N3Q8	90	>tr|C4M3X8|C4M3X8_ENTHI Serine/threonine protein phosphatase PP2A catalytic subunit, putative OS=Entamoeba histolytica OX=5759 GN=EHI_200730 PE=4 SV=1;>tr|B1N3Q8|B1N3Q8_ENTHI Serine/threonine protein phosphatase PP2A catalytic subunit, putative OS=Entamoeb
C4M2K1	Calcium-transporting ATPase	EHI_054830	0.0202685	0.0701213	4.10552	34.4702	29.2535	33.8516	29.94	33.2619	30.0737	23800000512	640000000	15500000256	1030000000	10300000256	1130000000					56	44.6	44.6	24.3	120.63	0	323.31	52	32	51	38	52	39	C4M2K1	1255	>tr|C4M2K1|C4M2K1_ENTHI Calcium-transporting ATPase OS=Entamoeba histolytica OX=5759 GN=EHI_054830 PE=3 SV=1
C4M3A7	Uncharacterized protein	EHI_175400	0.000850501	0.0487947	4.10504	27.8623	23.9495	27.4862	23.1612	27.4551	23.3778	244000000	16200000	188000000	9380000	184000000	10900000			+	Plus DTT_Minus DTT	4	7.3	7.3	7.3	108.27	0	4.3198	3	3	3	2	4	2	C4M3A7	1328	>tr|C4M3A7|C4M3A7_ENTHI Uncharacterized protein OS=Entamoeba histolytica OX=5759 GN=EHI_175400 PE=4 SV=1
C4M7V7	Glutamine--fructose-6-phosphate transaminase (isomerizing)	EHI_029560	0.0313283	0.0820572	4.1027	29.7565	24.1946	29.1337	25.5105	28.8593	25.7363	907000000	19200000	589000000	47800000	487000000	55900000					11	18.4	18.4	18.4	67.774	0	33.248	8	3	9	5	11	5	C4M7V7	1746	>tr|C4M7V7|C4M7V7_ENTHI Glutamine--fructose-6-phosphate transaminase (isomerizing) OS=Entamoeba histolytica OX=5759 GN=EHI_029560 PE=4 SV=1
C4M2Q5	Uncharacterized protein	EHI_160870	0.0123659	0.06208	4.10026	25.9111	21.2535	27.8858	23.4298	25.3545	22.1673	63100000	2500000	248000000	11300000	42900000	4710000					6	6.9	6.9	6.9	82.99	0	6.9079	3	1	6	2	3	1	C4M2Q5	1272	>tr|C4M2Q5|C4M2Q5_ENTHI Uncharacterized protein OS=Entamoeba histolytica OX=5759 GN=EHI_160870 PE=4 SV=1
B1N4G2;C4LUI1;C4MAJ2	Uncharacterized protein (Fragment);Uncharacterized protein	EHI_187800;EHI_049820	0.0370532	0.0877893	4.09701	30.3303	24.6703	29.4194	25.726	28.8916	25.9539	1350000000	26700000	718000000	55500000	498000000	65000000					14	30.7	30.7	5.7	57.136	0	61.178	14	4	13	7	11	6	B1N4G2;C4LUI1;C4MAJ2	127	>tr|B1N4G2|B1N4G2_ENTHI Uncharacterized protein (Fragment) OS=Entamoeba histolytica OX=5759 GN=EHI_187800 PE=4 SV=1;>tr|C4LUI1|C4LUI1_ENTHI Uncharacterized protein OS=Entamoeba histolytica OX=5759 GN=EHI_049820 PE=4 SV=1;>tr|C4MAJ2|C4MAJ2_ENTHI Uncharacter
C4M491	MuT/nudix family protein	EHI_097930	0.026391	0.0766382	4.09529	29.1507	24.7441	29.1115	24.0275	28.4976	25.7024	596000000	28100000	580000000	17100000	379000000	54600000					6	22	22	22	23.698	0	34.111	5	4	6	3	6	4	C4M491	1434	>tr|C4M491|C4M491_ENTHI MuT/nudix family protein OS=Entamoeba histolytica OX=5759 GN=EHI_097930 PE=4 SV=1
C4LUJ0	Tubulin beta chain	EHI_049920	0.0377882	0.0883543	4.09155	31.525	25.8433	29.8741	26.239	30.0084	27.0505	3089999872	60200000	984000000	79200000	1080000000	139000000					13	29.6	29.6	29.6	51.18	0	71.55	12	8	10	8	13	9	C4LUJ0	432	>tr|C4LUJ0|C4LUJ0_ENTHI Tubulin beta chain OS=Entamoeba histolytica OX=5759 GN=EHI_049920 PE=3 SV=1
Q769I7	Cysteine desulfurase	EhnifS	0.0439856	0.0974592	4.08352	32.2048	26.3612	30.5014	27.1214	30.1483	27.1214	4950000128	86200000	1520000000	146000000	1190000000	146000000					17	57.9	57.9	57.9	42.808	0	223.35	17	11	15	11	14	13	Q769I7	2280	>tr|Q769I7|Q769I7_ENTHI Cysteine desulfurase OS=Entamoeba histolytica OX=5759 GN=EhnifS PE=2 SV=1
Q5FLN0	SlpX	slpX	0.183516	0.265083	4.08198	25.1565	19	25.0894	19	19	19	37400000	0	35700000	0	0	0	+				1	1.8	1.8	1.8	54.193	1	-2	1	0	1	0	0	0	Q5FLN0	2235	>tr|Q5FLN0|Q5FLN0_LACAC SlpX OS=Lactobacillus acidophilus (strain ATCC 700396 / NCK56 / N2 / NCFM) OX=272621 GN=slpX PE=4 SV=2
C4LUD5	Proteasome subunit beta	EHI_049330	0.0176705	0.0664714	4.08119	27.7895	22.8746	27.4707	23.1856	26.6865	23.6431	232000000	7690000	186000000	9540000	108000000	13100000					4	23.9	23.9	23.9	22.699	0	7.3713	3	2	3	3	2	3	C4LUD5	419	>tr|C4LUD5|C4LUD5_ENTHI Proteasome subunit beta OS=Entamoeba histolytica OX=5759 GN=EHI_049330 PE=3 SV=1
C4LVT5	Ubiquitin-protein ligase, putative	EHI_187180	0.187622	0.26536	4.08113	19	19	25.7389	19	24.5045	19	0	0	56000000	0	23800000	0					2	2.9	2.9	2.9	76.29	0.0060241	1.533	0	0	2	0	2	0	C4LVT5	582	>tr|C4LVT5|C4LVT5_ENTHI Ubiquitin-protein ligase, putative OS=Entamoeba histolytica OX=5759 GN=EHI_187180 PE=4 SV=1
C4M614	Uncharacterized protein	EHI_072110	0.0179337	0.0664714	4.07712	27.5609	22.3778	26.8741	23.3101	26.6998	23.2155	198000000	5450000	123000000	10400000	109000000	9740000					4	4.4	4.4	4.4	102.94	0	3.9309	3	1	4	2	4	2	C4M614	1590	>tr|C4M614|C4M614_ENTHI Uncharacterized protein OS=Entamoeba histolytica OX=5759 GN=EHI_072110 PE=4 SV=1
C4M7K5	Uncharacterized protein	EHI_170380	0.135625	0.211256	4.07285	26.4057	19	24.1015	21.9951	24.6595	21.953	88900000	0	18000000	4180000	26500000	4060000					4	4.6	4.6	4.6	113.09	0	6.3239	2	0	3	1	3	1	C4M7K5	1725	>tr|C4M7K5|C4M7K5_ENTHI Uncharacterized protein OS=Entamoeba histolytica OX=5759 GN=EHI_170380 PE=4 SV=1
Q5NT18	Rab family GTPase (Fragment)	EhRabM3	0.0280554	0.0789038	4.07231	28.362	23.5869	28.141	23.3778	27.6458	24.9672	345000000	12600000	296000000	10900000	210000000	32800000					5	31.9	31.9	31.9	22.558	0	14.857	5	2	5	1	5	5	Q5NT18	2261	>tr|Q5NT18|Q5NT18_ENTHI Rab family GTPase (Fragment) OS=Entamoeba histolytica OX=5759 GN=EhRabM3 PE=3 SV=1
C4LV52	Uncharacterized protein	EHI_182710	0.00125967	0.0487947	4.07194	28.6764	24.3239	28.8264	24.8336	28.5463	24.6757	429000000	21000000	476000000	29900000	392000000	26800000			+	Plus DTT_Minus DTT	3	4.1	4.1	4.1	65.231	0.005059	1.7066	3	1	1	1	2	1	C4LV52	498	>tr|C4LV52|C4LV52_ENTHI Uncharacterized protein OS=Entamoeba histolytica OX=5759 GN=EHI_182710 PE=4 SV=1
C4M3Y9	Signal recognition particle receptor alpha subunit, putative	EHI_200840	0.0317038	0.0825297	4.06578	28.3578	24.2317	28.9622	23.6431	28.1065	25.3545	344000000	19700000	523000000	13100000	289000000	42900000					10	26.2	26.2	26.2	54.149	0	19.133	4	6	10	4	9	9	C4M3Y9	1401	>tr|C4M3Y9|C4M3Y9_ENTHI Signal recognition particle receptor alpha subunit, putative OS=Entamoeba histolytica OX=5759 GN=EHI_200840 PE=3 SV=1
C4LYY6	Uncharacterized protein	EHI_118020	0.0202218	0.0701213	4.06269	28.611	24.0359	27.3324	22.6119	27.3662	24.4738	410000000	17200000	169000000	6410000	173000000	23300000					2	9.9	9.9	9.9	25.437	0.0089568	1.3261	2	1	1	1	2	1	C4LYY6	908	>tr|C4LYY6|C4LYY6_ENTHI Uncharacterized protein OS=Entamoeba histolytica OX=5759 GN=EHI_118020 PE=4 SV=1
C4LTY9	Replication factor A, putative	EHI_067930	0.187283	0.265083	4.06185	25.6811	19	24.5045	19	19	19	53800000	0	23800000	0	0	0	+				1	1.8	1.8	1.8	65.484	1	-2	1	0	1	0	0	0	C4LTY9	369	>tr|C4LTY9|C4LTY9_ENTHI Replication factor A, putative OS=Entamoeba histolytica OX=5759 GN=EHI_067930 PE=4 SV=1
C4LZT5	Amino acid transporter, putative	EHI_194200	0.0218241	0.0717493	4.06144	28.4473	23.7594	28.55	23.895	27.611	24.7695	366000000	14200000	393000000	15600000	205000000	28600000					7	14.2	14.2	14.2	59.758	0	27.374	6	3	6	3	4	3	C4LZT5	987	>tr|C4LZT5|C4LZT5_ENTHI Amino acid transporter, putative OS=Entamoeba histolytica OX=5759 GN=EHI_194200 PE=4 SV=1
C4M2D4	LIM zinc finger domain containing protein	EHI_158150	0.0371476	0.0877893	4.06033	31.7692	27.5165	31.2759	25.9271	30.5664	27.9869	3660000000	192000000	2600000000	63800000	1590000000	266000000					17	57.6	57.6	57.6	35.781	0	74.092	14	8	17	6	15	10	C4M2D4	1235	>tr|C4M2D4|C4M2D4_ENTHI LIM zinc finger domain containing protein OS=Entamoeba histolytica OX=5759 GN=EHI_158150 PE=4 SV=1
C4M3Y5	Uncharacterized protein	EHI_200800	0.173929	0.262128	4.0506	24.7645	19	25.2353	19	24.6865	24.5345	28500000	0	39500000	0	27000000	24300000					1	11.5	11.5	11.5	14.918	0	3.3404	1	0	1	0	1	1	C4M3Y5	1398	>tr|C4M3Y5|C4M3Y5_ENTHI Uncharacterized protein OS=Entamoeba histolytica OX=5759 GN=EHI_200800 PE=4 SV=1
C4LZF3	Uncharacterized protein	EHI_137920	0.0907614	0.156463	4.04682	30.2422	23.5754	28.9677	26.2002	28.8355	26.1293	1270000000	12500000	525000000	77100000	479000000	73400000					12	26	26	26	56.271	0	109.1	8	5	11	5	9	4	C4LZF3	953	>tr|C4LZF3|C4LZF3_ENTHI Uncharacterized protein OS=Entamoeba histolytica OX=5759 GN=EHI_137920 PE=4 SV=1
C4LUW9	Adenylyl-sulfate kinase	EHI_179080	0.0230702	0.0729411	4.04382	30.1239	25.0401	29.6915	25.5667	29.1819	26.2589	1170000000	34500000	867000000	49700000	609000000	80300000					13	30.6	30.6	30.6	52.732	0	29.895	9	6	10	6	9	7	C4LUW9	475	>tr|C4LUW9|C4LUW9_ENTHI Adenylyl-sulfate kinase OS=Entamoeba histolytica OX=5759 GN=EHI_179080 PE=3 SV=1
A7UFC2	TATA-box-binding protein-like 1	trf1	0.00992461	0.0585237	4.03686	29.7014	24.8717	29.4668	25.6811	29.2847	25.7895	873000000	30700000	742000000	53800000	654000000	58000000					2	6.5	6.5	6.5	24.184	0.0023474	2.0611	2	2	2	2	2	2	A7UFC2	3	>sp|A7UFC2|TBPL1_ENTHI TATA-box-binding protein-like 1 OS=Entamoeba histolytica OX=5759 GN=trf1 PE=3 SV=1
C4M4Y1	Serine protease inhibitor, putative	EHI_119330	0.0161353	0.0653595	4.03666	29.066	24.0359	29.2147	25.4138	28.1507	24.8717	562000000	17200000	623000000	44700000	298000000	30700000					8	22.4	22.4	22.4	42.596	0	16.711	5	4	7	5	6	3	C4M4Y1	1491	>tr|C4M4Y1|C4M4Y1_ENTHI Serine protease inhibitor, putative OS=Entamoeba histolytica OX=5759 GN=EHI_119330 PE=2 SV=1
Q5NT17	Rab family GTPase (Fragment)	EhRabM1	0.191456	0.267137	4.03545	19	19	25.9043	19	24.2021	19	0	0	62800000	0	19300000	0					2	9.5	9.5	9.5	23.832	0	3.6538	0	0	2	0	2	0	Q5NT17	2260	>tr|Q5NT17|Q5NT17_ENTHI Rab family GTPase (Fragment) OS=Entamoeba histolytica OX=5759 GN=EhRabM1 PE=3 SV=1
C4LUK7	DNA-directed RNA polymerase subunit beta	EHI_022940	0.0169474	0.0659748	4.03	26.9977	21.9243	26.9869	23.654	26.9316	23.2477	134000000	3980000	133000000	13200000	128000000	9960000					6	6	6	6	131.88	0	9.0508	3	1	4	4	5	2	C4LUK7	439	>tr|C4LUK7|C4LUK7_ENTHI DNA-directed RNA polymerase subunit beta OS=Entamoeba histolytica OX=5759 GN=EHI_022940 PE=3 SV=1
Q8I8C9	Cysteine protease 19	CP19	0.183851	0.265083	4.02237	25.2096	19	19	19	24.8576	19	38800000	0	0	0	30400000	0					1	5.2	5.2	5.2	36.594	0	2.9778	1	0	1	0	1	0	Q8I8C9	2288	>tr|Q8I8C9|Q8I8C9_ENTHI Cysteine protease 19 OS=Entamoeba histolytica OX=5759 GN=CP19 PE=3 SV=1
C4LVF4	Uncharacterized protein	EHI_197380	0.183626	0.265083	4.00876	25.1174	19	24.9088	19	19	19	36400000	0	31500000	0	0	0	+				1	1.2	1.2	1.2	76.491	1	-2	1	0	1	0	0	0	C4LVF4	530	>tr|C4LVF4|C4LVF4_ENTHI Uncharacterized protein OS=Entamoeba histolytica OX=5759 GN=EHI_197380 PE=4 SV=1
C4LVS8	Rho GTPase activating protein, putative	EHI_187110	0.0235512	0.0731721	4.00726	33.1753	27.9316	32.9591	29.3992	32.4234	29.2054	9699999744	256000000	8350000128	708000000	5760000000	619000000					44	49.8	49.8	49.8	105	0	268.03	40	18	39	25	38	25	C4LVS8	578	>tr|C4LVS8|C4LVS8_ENTHI Rho GTPase activating protein, putative OS=Entamoeba histolytica OX=5759 GN=EHI_187110 PE=4 SV=1
C4LSC0	Uncharacterized protein	EHI_153290	0.185323	0.265083	4.00377	19	19	25.4073	19	24.604	19	0	0	44500000	0	25500000	0					1	2.7	2.7	2.7	46.64	0.0012446	2.4627	0	0	1	0	1	0	C4LSC0	191	>tr|C4LSC0|C4LSC0_ENTHI Uncharacterized protein OS=Entamoeba histolytica OX=5759 GN=EHI_153290 PE=4 SV=1
C4M105	Protein kinase, putative	EHI_135190	0.0147915	0.0638958	3.99933	30.9677	25.9912	30.2869	26.8741	29.9117	26.3031	2100000000	66700000	1310000000	123000000	1010000000	82800000					16	22.6	22.6	22.6	100.79	0	123.95	13	9	16	10	14	7	C4M105	1109	>tr|C4M105|C4M105_ENTHI Protein kinase, putative OS=Entamoeba histolytica OX=5759 GN=EHI_135190 PE=4 SV=1
Q8WQ58	COP9 signalosome complex subunit 1, putative	fus6	0.0272923	0.0783949	3.99856	28.6865	23.3511	28.003	24.5165	27.4629	24.2891	432000000	10700000	269000000	24000000	185000000	20500000					9	26.8	26.8	26.8	45.432	0	37.464	7	2	7	3	8	4	Q8WQ58	2292	>tr|Q8WQ58|Q8WQ58_ENTHI COP9 signalosome complex subunit 1, putative OS=Entamoeba histolytica OX=5759 GN=fus6 PE=2 SV=1
C4M8U8	Uncharacterized protein	EHI_169670	0.0906892	0.15646	3.97862	31.2077	24.7024	29.6475	26.5029	29.2399	26.9539	2480000000	27300000	841000000	95100000	634000000	130000000					27	30.4	30.4	30.4	98.706	0	223.46	24	5	18	10	15	14	C4M8U8;C4LXQ5	1831	>tr|C4M8U8|C4M8U8_ENTHI Uncharacterized protein OS=Entamoeba histolytica OX=5759 GN=EHI_169670 PE=4 SV=1
C4M1L6	Uncharacterized protein	EHI_085060	0.0469306	0.101375	3.96612	26.8504	24.1253	28.509	22.8152	27.5969	24.1174	121000000	18300000	382000000	7380000	203000000	18200000					6	11.5	11.5	11.5	76.516	0	17.436	2	4	6	2	4	3	C4M1L6	1166	>tr|C4M1L6|C4M1L6_ENTHI Uncharacterized protein OS=Entamoeba histolytica OX=5759 GN=EHI_085060 PE=4 SV=1
Q6AW64	EhRab7E protein	EhRAB7E	0.0613484	0.119473	3.96435	28.066	22.2185	26.2353	22.4898	25.6375	23.3376	281000000	4880000	79000000	5890000	52200000	10600000					3	26.1	21.3	21.3	22.65	0	7.3934	3	1	3	1	2	2	Q6AW64	2272	>tr|Q6AW64|Q6AW64_ENTHI EhRab7E protein OS=Entamoeba histolytica OX=5759 GN=EhRAB7E PE=3 SV=1
C4M4P7	WD domain containing protein	EHI_168370	0.0196359	0.0690354	3.95848	31.1239	26.0401	29.8549	26.4234	29.509	26.1488	2340000000	69000000	971000000	90000000	764000000	74400000					22	41.9	41.9	41.9	57.817	0	87.774	19	10	17	11	18	9	C4M4P7	1475	>tr|C4M4P7|C4M4P7_ENTHI WD domain containing protein OS=Entamoeba histolytica OX=5759 GN=EHI_168370 PE=4 SV=1
C4LT56;C4LY16	Calmodulin, putative;Calcium binding family protein	EHI_148890;EHI_177620	0.0352945	0.0865473	3.95812	28.5203	23.2375	27.8504	23.895	27.4938	24.8576	385000000	9890000	242000000	15600000	189000000	30400000					5	48.6	48.6	48.6	16.872	0	78.579	4	2	3	2	3	2	C4LT56;C4LY16	287	>tr|C4LT56|C4LT56_ENTHI Calmodulin, putative OS=Entamoeba histolytica OX=5759 GN=EHI_148890 PE=4 SV=1;>tr|C4LY16|C4LY16_ENTHI Calcium binding family protein OS=Entamoeba histolytica OX=5759 GN=EHI_177620 PE=4 SV=1
C4LXH4	Uncharacterized protein	EHI_131060	0.0402493	0.0919261	3.95587	27.2803	22.0886	23.2679	19	23.7182	21.3101	163000000	4460000	10100000	0	13800000	2600000					4	7.6	7.6	7.6	64.261	0	7.5477	4	1	1	0	2	1	C4LXH4	767	>tr|C4LXH4|C4LXH4_ENTHI Uncharacterized protein OS=Entamoeba histolytica OX=5759 GN=EHI_131060 PE=4 SV=1
C4M964	Acyl-CoA synthetase, putative	EHI_135740	0.060996	0.11895	3.95567	31.8571	25.8528	30.7453	27.7895	30.1604	27.2535	3889999872	60600000	1800000000	232000000	1200000000	160000000					28	35.5	33.6	33.6	115.13	0	106.8	27	11	23	16	23	15	C4M964	1868	>tr|C4M964|C4M964_ENTHI Acyl-CoA synthetase, putative OS=Entamoeba histolytica OX=5759 GN=EHI_135740 PE=4 SV=1
C4M5X8	Protein kinase domain containing protein	EHI_137040	0.0122274	0.0620459	3.95556	23.8385	19	22.5189	19	22.5093	19	15000000	0	6010000	0	5970000	0	+				1	2.6	0.9	0.9	131.59	1	-2	1	0	1	0	1	0	C4M5X8	1582	>tr|C4M5X8|C4M5X8_ENTHI Protein kinase domain containing protein OS=Entamoeba histolytica OX=5759 GN=EHI_137040 PE=4 SV=1
C4LVZ9;C4M9B0	60S ribosomal protein L9, putative	EHI_126140;EHI_193080	0.0171376	0.0662072	3.95394	31.2365	27.4862	31.9117	26.965	31.2308	28.066	2529999872	188000000	4040000000	131000000	2520000000	281000000					17	69.5	69.5	69.5	22.314	0	97.9	12	9	15	6	14	8	C4LVZ9;C4M9B0	604	>tr|C4LVZ9|C4LVZ9_ENTHI 60S ribosomal protein L9, putative OS=Entamoeba histolytica OX=5759 GN=EHI_126140 PE=2 SV=1;>tr|C4M9B0|C4M9B0_ENTHI 60S ribosomal protein L9, putative OS=Entamoeba histolytica OX=5759 GN=EHI_193080 PE=3 SV=1
B1N494	Uncharacterized protein	EHI_185450	0.0186461	0.0674722	3.95228	28.906	23.8764	28.2847	24.7024	27.7064	24.4614	503000000	15400000	327000000	27300000	219000000	23100000					6	30	10.5	10.5	93.838	0	50.02	5	2	4	2	3	2	B1N494	119	>tr|B1N494|B1N494_ENTHI Uncharacterized protein OS=Entamoeba histolytica OX=5759 GN=EHI_185450 PE=4 SV=1
C4LW96	Chaperonin containing TCP-1 epsilon subunit, putative	EHI_155450	0.0280065	0.0789038	3.94916	30.0084	25.1757	30.2422	25.8504	29.0813	26.4583	1080000000	37900000	1270000000	60500000	568000000	92200000					11	20.3	20.3	20.3	58.53	0	20.093	9	4	10	5	7	9	C4LW96	631	>tr|C4LW96|C4LW96_ENTHI Chaperonin containing TCP-1 epsilon subunit, putative OS=Entamoeba histolytica OX=5759 GN=EHI_155450 PE=2 SV=1
C4M774	Uncharacterized protein	EHI_199630	0.0418866	0.0944993	3.94316	27.9484	22.714	25.8647	23.48	26.002	21.7915	259000000	6880000	61100000	11700000	67200000	3630000	+				2	4.3	4.3	4.3	73.654	1	-2	2	1	2	2	2	1	C4M774	1689	>tr|C4M774|C4M774_ENTHI Uncharacterized protein OS=Entamoeba histolytica OX=5759 GN=EHI_199630 PE=4 SV=1
C4LVB0	60S ribosomal protein L23, putative	EHI_051710	0.0356807	0.087134	3.94087	29.5389	26.5898	31.3033	25.8576	30.8829	27.4551	780000000	101000000	2649999872	60800000	1980000000	184000000					7	37.1	37.1	37.1	15.233	0	56.409	5	4	7	3	7	4	C4LVB0	515	>tr|C4LVB0|C4LVB0_ENTHI 60S ribosomal protein L23, putative OS=Entamoeba histolytica OX=5759 GN=EHI_051710 PE=3 SV=1
C4LWI8	Zinc finger protein, putative	EHI_096780	0.00122816	0.0487947	3.93576	28.1842	23.9847	27.9428	24.2096	27.1984	23.3239	305000000	16600000	258000000	19400000	154000000	10500000			+	Plus DTT_Minus DTT	3	7.7	7.7	7.7	51.306	0	15.065	3	2	3	2	3	3	C4LWI8	661	>tr|C4LWI8|C4LWI8_ENTHI Zinc finger protein, putative OS=Entamoeba histolytica OX=5759 GN=EHI_096780 PE=4 SV=1
C4M9S8	Lipid phosphate phosphatase, putative	EHI_056630	0.114361	0.18593	3.93553	27.0914	20.2419	26.425	23.8093	26.4186	24.0772	143000000	1240000	90100000	14700000	89700000	17700000					2	4.5	4.5	4.5	46.551	0	3.9051	2	1	1	2	1	2	C4M9S8	1914	>tr|C4M9S8|C4M9S8_ENTHI Lipid phosphate phosphatase, putative OS=Entamoeba histolytica OX=5759 GN=EHI_056630 PE=4 SV=1
C4M520	Long-chain-fatty-acid--CoA ligase, putative	EHI_127830	0.0158839	0.0652032	3.93043	30.6713	25.9473	30.3196	26.2553	29.8887	26.8858	1710000000	64700000	1340000000	80100000	994000000	124000000					17	29.5	29.5	27	77.268	0	75.652	15	7	16	6	14	9	C4M520	1501	>tr|C4M520|C4M520_ENTHI Long-chain-fatty-acid--CoA ligase, putative OS=Entamoeba histolytica OX=5759 GN=EHI_127830 PE=4 SV=1
C4M2N9	Serine/threonine-protein phosphatase	EHI_006050	0.0546144	0.110971	3.93013	29.4668	23.6209	28.4274	25.4923	28.066	25.0567	742000000	12900000	361000000	47200000	281000000	34900000					7	34.9	34.9	23	34.459	0	26.763	6	2	6	4	6	5	C4M2N9	1265	>tr|C4M2N9|C4M2N9_ENTHI Serine/threonine-protein phosphatase OS=Entamoeba histolytica OX=5759 GN=EHI_006050 PE=2 SV=1
C4M8Q0	Ccaat-box-binding transcription factor, putative	EHI_132370	0.0525939	0.108347	3.92838	26.48	20.7471	26.2874	23.7077	25.8504	22.3778	93600000	1760000	81900000	13700000	60500000	5450000					5	7.1	7.1	7.1	83.629	0	5.6343	3	1	5	4	3	2	C4M8Q0	1819	>tr|C4M8Q0|C4M8Q0_ENTHI Ccaat-box-binding transcription factor, putative OS=Entamoeba histolytica OX=5759 GN=EHI_132370 PE=3 SV=1
C4M4D2	Long-chain-fatty-acid--CoA ligase, putative	EHI_156320	0.0686871	0.12865	3.92834	24.7594	19	24.7695	22.7695	26.3049	22.2792	28400000	0	28600000	7150000	82900000	5090000					2	5.6	3.1	3.1	77.081	0	7.3235	2	0	1	1	2	1	C4M4D2	1444	>tr|C4M4D2|C4M4D2_ENTHI Long-chain-fatty-acid--CoA ligase, putative OS=Entamoeba histolytica OX=5759 GN=EHI_156320 PE=4 SV=1
C4LXV4	Uncharacterized protein	EHI_087740	0.185636	0.265083	3.91616	25.2996	19	19	19	24.4488	19	41300000	0	0	0	22900000	0	+				1	1.5	1.5	1.5	76.259	1	-2	1	0	0	0	1	0	C4LXV4	799	>tr|C4LXV4|C4LXV4_ENTHI Uncharacterized protein OS=Entamoeba histolytica OX=5759 GN=EHI_087740 PE=4 SV=1
C4M634	Uncharacterized protein	EHI_179830	0.0499336	0.104946	3.90707	27.8799	22.2361	26.9869	23.4923	25.9738	23.391	247000000	4940000	133000000	11800000	65900000	11000000					5	7.3	7.3	7.3	69.031	0	9.7331	4	1	3	2	2	2	C4M634	1595	>tr|C4M634|C4M634_ENTHI Uncharacterized protein OS=Entamoeba histolytica OX=5759 GN=EHI_179830 PE=4 SV=1
C4LWL1	Uncharacterized protein	EHI_069230	0.195343	0.270067	3.90424	25.8647	19	19	19	23.848	19	61100000	0	0	0	15100000	0					2	13.2	13.2	13.2	22.865	0	4.2736	2	0	0	0	1	0	C4LWL1	665	>tr|C4LWL1|C4LWL1_ENTHI Uncharacterized protein OS=Entamoeba histolytica OX=5759 GN=EHI_069230 PE=4 SV=1
Q6S4W2	Thymidine kinase	EHI_177540	0.0188627	0.0677852	3.90408	29.094	24.7846	28.9732	24.3975	28.391	25.5638	573000000	28900000	527000000	22100000	352000000	49600000					5	20.6	20.6	20.6	24.251	0	15.334	4	1	5	1	3	1	Q6S4W2	2276	>tr|Q6S4W2|Q6S4W2_ENTHI Thymidine kinase OS=Entamoeba histolytica OX=5759 GN=EHI_177540 PE=3 SV=1
Q6SCK6	Mitogen-activated protein kinase	EHI_073650	0.0084754	0.0559259	3.90287	32.1269	27.5389	31.9259	28.1652	31.3303	27.9705	4689999872	195000000	4080000000	301000000	2700000000	263000000					25	65.6	65.6	65.6	40.016	0	192.74	19	13	22	14	20	11	Q6SCK6	2277	>tr|Q6SCK6|Q6SCK6_ENTHI Mitogen-activated protein kinase OS=Entamoeba histolytica OX=5759 GN=EHI_073650 PE=2 SV=1
C4LU54	Alpha/beta hydrolase fold protein, putative	EHI_068640	0.047795	0.102438	3.90086	26.8623	21.4273	27.5682	25.1984	27.0711	23.1734	122000000	2820000	199000000	38500000	141000000	9460000					3	7.4	7.4	7.4	45.567	0	3.118	2	1	3	3	3	2	C4LU54	392	>tr|C4LU54|C4LU54_ENTHI Alpha/beta hydrolase fold protein, putative OS=Entamoeba histolytica OX=5759 GN=EHI_068640 PE=3 SV=1
C4M9N3	HEAT repeat domain containing protein	EHI_060990	0.18687	0.265083	3.89486	24.3101	19	25.3745	19	19	19	20800000	0	43500000	0	0	0					3	4.3	4.3	4.3	91.002	0	15.142	2	0	1	0	1	0	C4M9N3	1903	>tr|C4M9N3|C4M9N3_ENTHI HEAT repeat domain containing protein OS=Entamoeba histolytica OX=5759 GN=EHI_060990 PE=4 SV=1
C4LVQ6	Uncharacterized protein	EHI_186890	0.184809	0.265083	3.89413	25.1719	19	24.5105	19	19	19	37800000	0	23900000	0	0	0					1	2.6	2.6	2.6	45.371	0.0034783	1.9529	1	0	1	0	0	0	C4LVQ6	569	>tr|C4LVQ6|C4LVQ6_ENTHI Uncharacterized protein OS=Entamoeba histolytica OX=5759 GN=EHI_186890 PE=4 SV=1
C4LXG3	Uncharacterized protein	EHI_130950	0.0427542	0.0955859	3.88977	27.8019	22.343	26.9316	23.3511	26.5433	23.9134	234000000	5320000	128000000	10700000	97800000	15800000					4	17.6	17.6	17.6	29.865	0	11.077	3	1	4	2	3	2	C4LXG3	762	>tr|C4LXG3|C4LXG3_ENTHI Uncharacterized protein OS=Entamoeba histolytica OX=5759 GN=EHI_130950 PE=4 SV=1
C4M1X7	Uncharacterized protein	EHI_164840	0.0980777	0.165367	3.88923	26.7771	21.2361	26.0526	21.2125	25.5898	24.3031	115000000	2470000	69600000	2430000	50500000	20700000	+				2	9.4	9.4	9.4	21.324	1	-2	2	1	2	1	2	2	C4M1X7	1201	>tr|C4M1X7|C4M1X7_ENTHI Uncharacterized protein OS=Entamoeba histolytica OX=5759 GN=EHI_164840 PE=4 SV=1
C4LVY9	TBC1 domain family member 23	EHI_126040	0.0499543	0.104946	3.88352	27.5682	22.976	27.9595	22.9933	27.3239	25.2317	199000000	8250000	261000000	8350000	168000000	39400000					9	12.8	12.8	12.8	79.949	0	16.534	5	1	8	2	6	6	C4LVY9	599	>tr|C4LVY9|C4LVY9_ENTHI TBC1 domain family member 23 OS=Entamoeba histolytica OX=5759 GN=EHI_126040 PE=4 SV=1
C4M5P4	Uncharacterized protein	EHI_040650	0.0489876	0.103796	3.87966	30.1239	24.6757	28.8112	24.9803	28.1937	25.8336	1170000000	26800000	471000000	33100000	307000000	59800000					16	14.4	14.4	14.4	138.9	0	33.619	14	5	12	6	13	9	C4M5P4	1558	>tr|C4M5P4|C4M5P4_ENTHI Uncharacterized protein OS=Entamoeba histolytica OX=5759 GN=EHI_040650 PE=4 SV=1
B1N2V3	Uncharacterized protein	EHI_159840	0.0378978	0.0883621	3.8792	27.0914	21.9423	24.6375	22.1704	25.0233	21.002	143000000	4030000	26100000	4720000	34100000	2100000					4	4.3	4.3	4.3	110.25	0	4.7212	3	2	2	1	3	1	B1N2V3	34	>tr|B1N2V3|B1N2V3_ENTHI Uncharacterized protein OS=Entamoeba histolytica OX=5759 GN=EHI_159840 PE=4 SV=1
B1N5D7	Uncharacterized protein	EHI_165660	0.00520589	0.052986	3.87724	22.3156	19	23.1658	19	23.1504	19	5220000	0	9410000	0	9310000	0	+				1	5.7	5.7	5.7	28.735	1	-2	1	0	1	0	1	0	B1N5D7	169	>tr|B1N5D7|B1N5D7_ENTHI Uncharacterized protein OS=Entamoeba histolytica OX=5759 GN=EHI_165660 PE=4 SV=1
C4M3X7	Uncharacterized protein	EHI_200710	0.195432	0.270067	3.87614	25.8191	19	23.8093	19	19	19	59200000	0	14700000	0	0	0	+				1	1.7	1.7	1.7	67.651	1	-2	1	0	1	0	0	0	C4M3X7	1395	>tr|C4M3X7|C4M3X7_ENTHI Uncharacterized protein OS=Entamoeba histolytica OX=5759 GN=EHI_200710 PE=1 SV=1
C4M0I4	D-hydantoinase, putative	EHI_024420	0.0298149	0.0801644	3.87359	30.4334	25.6375	29.9117	25.6237	29.3992	26.8623	1450000000	52200000	1010000000	51700000	708000000	122000000					14	35.9	35.9	35.9	50.614	0	58.413	13	7	14	6	13	8	C4M0I4	1065	>tr|C4M0I4|C4M0I4_ENTHI D-hydantoinase, putative OS=Entamoeba histolytica OX=5759 GN=EHI_024420 PE=3 SV=1
C4M4L8;B1N4P1	GTP-binding protein	EHI_031410;EHI_075040	0.00718141	0.0559259	3.87264	30.2422	25.8717	29.9814	25.9825	29.5844	26.3359	1270000000	61400000	1060000000	66300000	805000000	84700000					8	55.8	55.8	55.8	21.474	0	31.866	8	6	8	5	8	6	C4M4L8;B1N4P1	139	>tr|C4M4L8|C4M4L8_ENTHI GTP-binding protein OS=Entamoeba histolytica OX=5759 GN=EHI_031410 PE=3 SV=1;>tr|B1N4P1|B1N4P1_ENTHI GTP-binding protein OS=Entamoeba histolytica OX=5759 GN=EHI_075040 PE=3 SV=1
C4LWW4	Methionine aminopeptidase 2	EHI_126880	0.0209894	0.0702577	3.87217	31.5435	26.5754	30.9539	27.3578	30.4433	27.391	3129999872	100000000	2080000000	172000000	1460000000	176000000					15	35.8	35.8	35.8	46.004	0	61.546	12	8	11	10	11	8	C4LWW4	699	>tr|C4LWW4|C4LWW4_ENTHI Methionine aminopeptidase 2 OS=Entamoeba histolytica OX=5759 GN=EHI_126880 PE=2 SV=1
C4M457	Uncharacterized protein	EHI_030450	0.00929935	0.0566776	3.87196	28.3787	23.7594	27.9539	24.5285	28.0137	24.4425	349000000	14200000	260000000	24200000	271000000	22800000					16	16.6	16.6	16.6	106.56	0	35.074	11	2	11	3	11	4	C4M457	1420	>tr|C4M457|C4M457_ENTHI Uncharacterized protein OS=Entamoeba histolytica OX=5759 GN=EHI_030450 PE=3 SV=1
C4LSC8	Uncharacterized protein	EHI_153370	0.16255	0.248166	3.87078	26.417	19	25.7234	23.2521	25.141	23.417	89600000	0	55400000	9990000	37000000	11200000					3	3.1	3.1	3.1	117.17	0	4.3813	3	0	2	2	2	2	C4LSC8	194	>tr|C4LSC8|C4LSC8_ENTHI Uncharacterized protein OS=Entamoeba histolytica OX=5759 GN=EHI_153370 PE=4 SV=1
C4M697	Uncharacterized protein	EHI_081700	0.117762	0.190073	3.86748	27.1214	20.4273	26.8974	25.0732	26.3662	23.2821	146000000	1410000	125000000	35300000	86500000	10200000					2	7.3	7.3	7.3	28.001	0	4.091	2	1	2	2	2	2	C4M697	1611	>tr|C4M697|C4M697_ENTHI Uncharacterized protein OS=Entamoeba histolytica OX=5759 GN=EHI_081700 PE=4 SV=1
C4M4V9	Chitobiosyldiphosphodolichol beta-mannosyltransferase, putative	EHI_028950	0.0319645	0.0826554	3.8648	29.94	24.6649	29.4314	26.1604	28.6005	25.5522	1030000000	26600000	724000000	75000000	407000000	49200000					11	27.2	27.2	27.2	49.502	0	45.987	11	4	9	6	7	5	C4M4V9	1487	>tr|C4M4V9|C4M4V9_ENTHI Chitobiosyldiphosphodolichol beta-mannosyltransferase, putative OS=Entamoeba histolytica OX=5759 GN=EHI_028950 PE=4 SV=1
Q9BLE4	Small GTPase Rab11B	EhRab11B	0.0344294	0.0855011	3.86314	32.4895	27.1604	30.7533	27.509	30.7613	27.7453	6030000128	150000000	1810000000	191000000	1820000000	225000000					16	68.7	68.7	55	23.786	0	66.48	15	10	14	11	15	10	Q9BLE4	2300	>tr|Q9BLE4|Q9BLE4_ENTHI Small GTPase Rab11B OS=Entamoeba histolytica OX=5759 GN=EhRab11B PE=2 SV=1
C4M4C5	Structure-specific endonuclease subunit SLX1 homolog	EHI_156250	0.186821	0.265083	3.85577	25.3066	19	24.2607	19	19	19	41500000	0	20100000	0	0	0	+				1	2.6	2.6	2.6	35.884	1	-2	1	0	1	0	0	0	C4M4C5	1442	>tr|C4M4C5|C4M4C5_ENTHI Structure-specific endonuclease subunit SLX1 homolog OS=Entamoeba histolytica OX=5759 GN=EHI_156250 PE=3 SV=1
C4M2R2	Aldehyde-alcohol dehydrogenase	EHI_160940	0.0959741	0.162467	3.85201	31.7613	25.3612	31.0217	28.7708	30.8309	27.9259	3640000000	43100000	2180000000	458000000	1910000000	255000000					1	85.9	3	3	95.589	0	63.326	1	1	1	1	1	1	C4M2R2	1273	>tr|C4M2R2|C4M2R2_ENTHI Aldehyde-alcohol dehydrogenase OS=Entamoeba histolytica OX=5759 GN=EHI_160940 PE=3 SV=1
C4M5B7	40S ribosomal protein S23, putative	EHI_020310	0.00564064	0.05403	3.84804	29.9814	26.4202	30.8309	26.4024	31.0017	27.4473	1060000000	89800000	1910000000	88700000	2150000128	183000000					9	46.8	46.8	46.8	15.711	0	67.058	7	4	8	3	9	5	C4M5B7	1529	>tr|C4M5B7|C4M5B7_ENTHI 40S ribosomal protein S23, putative OS=Entamoeba histolytica OX=5759 GN=EHI_020310 PE=3 SV=1
C4M1W9	Uncharacterized protein	EHI_164760	0.0351511	0.0865473	3.84702	28.3239	22.9951	27.4785	24.3578	27.217	24.1253	336000000	8360000	187000000	21500000	156000000	18300000					4	14.1	14.1	14.1	33.212	0	3.7723	4	1	3	2	3	2	C4M1W9	1195	>tr|C4M1W9|C4M1W9_ENTHI Uncharacterized protein OS=Entamoeba histolytica OX=5759 GN=EHI_164760 PE=4 SV=1
C4MBA1	Methyltransf_11 domain-containing protein	EHI_031630	0.186319	0.265083	3.84634	25.2499	19	24.2891	19	19	19	39900000	0	20500000	0	0	0	+				1	2.2	2.2	2.2	47.434	1	-2	1	0	1	0	0	0	C4MBA1	2014	>tr|C4MBA1|C4MBA1_ENTHI Methyltransf_11 domain-containing protein OS=Entamoeba histolytica OX=5759 GN=EHI_031630 PE=4 SV=1
C4LU55	Uncharacterized protein	EHI_068650	0.18477	0.265083	3.84263	19	19	25.0854	19	24.4425	19	0	0	35600000	0	22800000	0					2	5.3	5.3	5.3	47.751	0.0011855	2.1191	0	0	1	0	2	0	C4LU55	393	>tr|C4LU55|C4LU55_ENTHI Uncharacterized protein OS=Entamoeba histolytica OX=5759 GN=EHI_068650 PE=4 SV=1
C4LZ39	Uncharacterized protein	EHI_009650	0.184329	0.265083	3.84258	25.0233	19	19	19	24.5045	19	34100000	0	0	0	23800000	0	+				1	3.1	3.1	3.1	37.951	1	-2	1	0	0	0	1	0	C4LZ39	924	>tr|C4LZ39|C4LZ39_ENTHI Uncharacterized protein OS=Entamoeba histolytica OX=5759 GN=EHI_009650 PE=4 SV=1
C4LSA0	60S ribosomal protein L24, putative	EHI_030760	0.0065124	0.0548842	3.83818	30.9539	26.8385	31.1361	26.9539	31.0673	27.8504	2080000000	120000000	2360000000	130000000	2249999872	242000000					17	57.7	57.7	57.7	18.604	0	48.566	15	11	16	10	17	11	C4LSA0	185	>tr|C4LSA0|C4LSA0_ENTHI 60S ribosomal protein L24, putative OS=Entamoeba histolytica OX=5759 GN=EHI_030760 PE=3 SV=1
Q9U593;B1N629	Dipeptidyl-peptidase;Dipeptidyl-peptidase, putative	dpp;EHI_061340	0.0191794	0.0685111	3.83117	30.2193	25.6209	30.2869	26.1852	29.0965	26.3031	1250000000	51600000	1310000000	76300000	574000000	82800000					10	17.7	17.7	17.7	76.529	0	99.402	10	7	10	5	7	4	Q9U593;B1N629;B1N5R5	2306	>tr|Q9U593|Q9U593_ENTHI Dipeptidyl-peptidase OS=Entamoeba histolytica OX=5759 GN=dpp PE=2 SV=1;>tr|B1N629|B1N629_ENTHI Dipeptidyl-peptidase, putative OS=Entamoeba histolytica OX=5759 GN=EHI_061340 PE=4 SV=1
CON__ENSEMBL:ENSBTAP00000034412			0.0338385	0.0850035	3.08894	30.2535	27.141	30.4532	26.3662	29.5147	27.4473	1280000000	148000000	1470000000	86500000	767000000	183000000		+			13	48.2	48.2	48.2	22.336	0	88.318	10	6	12	5	9	7	CON__ENSEMBL:ENSBTAP00000034412	2054	>ENSEMBL:ENSBTAP00000034412 (Bos taurus) similar to C4b-binding protein alpha chain
C4LYB3	Filopodin, putative	EHI_167130	0.0310711	0.0818084	3.82966	32.2563	27.17	31.1239	27.4234	31.196	28.4938	5129999872	151000000	2340000000	180000000	2460000000	378000000					29	20.6	20.6	20.6	180.43	0	171.73	21	12	22	13	23	17	C4LYB3	841	>tr|C4LYB3|C4LYB3_ENTHI Filopodin, putative OS=Entamoeba histolytica OX=5759 GN=EHI_167130 PE=4 SV=1
C4LUF7	PPM-type phosphatase domain-containing protein	EHI_049560	0.185833	0.265083	3.825	19	19	25.1719	19	24.3031	19	0	0	37800000	0	20700000	0					1	3.3	3.3	3.3	41.418	0.0011905	2.1418	0	0	1	0	1	0	C4LUF7	423	>tr|C4LUF7|C4LUF7_ENTHI PPM-type phosphatase domain-containing protein OS=Entamoeba histolytica OX=5759 GN=EHI_049560 PE=4 SV=1
C4LXZ6	Queuine tRNA-ribosyltransferase catalytic subunit 1	EHI_035660	0.0114029	0.0608063	3.81908	27.7064	23.0756	27.5315	24.002	27.3578	24.0609	219000000	8840000	194000000	16800000	172000000	17500000	+				2	4.5	4.5	4.5	44.261	1	-2	1	1	2	2	1	1	C4LXZ6	809	>tr|C4LXZ6|C4LXZ6_ENTHI Queuine tRNA-ribosyltransferase catalytic subunit 1 OS=Entamoeba histolytica OX=5759 GN=EHI_035660 PE=3 SV=1
C4M9S3	Rho family GTPase	EHI_135450	0.113888	0.185567	3.81618	24.976	23.2679	28.2308	21.7348	27.1115	23.867	33000000	10100000	315000000	3490000	145000000	15300000					4	23.6	23.6	23.6	22.418	0	11.401	1	3	4	1	3	3	C4M9S3	1912	>tr|C4M9S3|C4M9S3_ENTHI Rho family GTPase OS=Entamoeba histolytica OX=5759 GN=EHI_135450 PE=3 SV=1
C4LVH1	Diaphanous protein, homolog 2, putative	EHI_197550	0.0842979	0.148069	3.81481	29.7988	23.6757	27.9259	24.8093	27.9203	25.7155	934000000	13400000	255000000	29400000	254000000	55100000					9	10.5	10.5	10.5	110.77	0	54.746	8	4	7	4	7	7	C4LVH1	534	>tr|C4LVH1|C4LVH1_ENTHI Diaphanous protein, homolog 2, putative OS=Entamoeba histolytica OX=5759 GN=EHI_197550 PE=3 SV=1
C4M9J5	Uncharacterized protein	EHI_107790	0.0277284	0.0789038	3.81343	27.7645	22.8385	26.7895	22.9548	26.518	23.8385	228000000	7500000	116000000	8130000	96100000	15000000					4	19.5	19.5	19.5	22.15	0	27.671	4	1	3	1	2	2	C4M9J5	1897	>tr|C4M9J5|C4M9J5_ENTHI Uncharacterized protein OS=Entamoeba histolytica OX=5759 GN=EHI_107790 PE=4 SV=1
C4LUM3	NADP-dependent alcohol dehydrogenase	EHI_023110	0.0155417	0.0646174	3.80841	35.0017	30.2647	34.4334	30.8755	33.9153	30.7849	34400002048	1290000000	23200000000	1970000000	16199999488	1850000000					29	86.9	86.9	86.9	39.215	0	323.31	27	17	29	20	27	16	C4LUM3	443	>tr|C4LUM3|C4LUM3_ENTHI NADP-dependent alcohol dehydrogenase OS=Entamoeba histolytica OX=5759 GN=EHI_023110 PE=2 SV=1
C4LYH8	Phosphoglycerate mutase domain family protein	EHI_093870	0.072471	0.133136	3.80155	27.17	21.2125	26.3376	23.4298	25.6944	23.155	151000000	2430000	84800000	11300000	54300000	9340000					5	8.4	8.4	8.4	79.178	0	7.3582	5	1	4	2	3	2	C4LYH8	859	>tr|C4LYH8|C4LYH8_ENTHI Phosphoglycerate mutase domain family protein OS=Entamoeba histolytica OX=5759 GN=EHI_093870 PE=3 SV=1
C4LZI4	Ubiquitin-conjugating enzyme family protein	EHI_124480	0.0378842	0.0883621	3.79192	26.9869	23.5165	26.2874	23.6209	26.8974	21.6584	133000000	12000000	81900000	12900000	125000000	3310000					3	13.9	13.9	13.9	19.659	0	3.2958	3	2	2	2	3	1	C4LZI4	966	>tr|C4LZI4|C4LZI4_ENTHI Ubiquitin-conjugating enzyme family protein OS=Entamoeba histolytica OX=5759 GN=EHI_124480 PE=3 SV=1
C4M9R2	Uncharacterized protein	EHI_196400	0.00839408	0.0559259	3.7912	29.2535	24.7695	29.393	25.867	29.066	25.7024	640000000	28600000	705000000	61200000	562000000	54600000					7	15.2	15.2	15.2	68.198	0	48.558	5	3	7	3	7	3	C4M9R2	1907	>tr|C4M9R2|C4M9R2_ENTHI Uncharacterized protein OS=Entamoeba histolytica OX=5759 GN=EHI_196400 PE=4 SV=1
C4LXM3	Serine-threonine-isoleucine rich protein, putative	EHI_073630	0.016708	0.065918	3.78753	32.6902	27.9316	32.0832	28.6075	31.6964	28.5682	6929999872	256000000	4550000128	409000000	3480000000	398000000					92	22	22	22	558.66	0	323.31	82	45	78	45	79	49	C4LXM3	785	>tr|C4LXM3|C4LXM3_ENTHI Serine-threonine-isoleucine rich protein, putative OS=Entamoeba histolytica OX=5759 GN=EHI_073630 PE=4 SV=1
C4LTR1	Oxysterol binding protein, putative	EHI_050360	0.0361993	0.0874584	3.78558	29.3001	25.0567	28.141	23.3645	27.8504	25.5135	661000000	34900000	296000000	10800000	242000000	47900000					13	16.8	16.8	16.8	82.702	0	35.907	11	6	10	3	10	7	C4LTR1;C4M380	343	>tr|C4LTR1|C4LTR1_ENTHI Oxysterol binding protein, putative OS=Entamoeba histolytica OX=5759 GN=EHI_050360 PE=3 SV=1
C4M3G5;B1N3K7	Serine/threonine-protein phosphatase	EHI_017600;EHI_109570	0.0235036	0.0731721	3.78261	28.0711	23.1222	27.2445	23.8858	26.4953	23.4551	282000000	9130000	159000000	15500000	94600000	11500000					6	15	15	15	61.485	0	13.766	5	2	5	2	5	1	C4M3G5;B1N3K7	1343	>tr|C4M3G5|C4M3G5_ENTHI Serine/threonine-protein phosphatase OS=Entamoeba histolytica OX=5759 GN=EHI_017600 PE=3 SV=1;>tr|B1N3K7|B1N3K7_ENTHI Serine/threonine-protein phosphatase OS=Entamoeba histolytica OX=5759 GN=EHI_109570 PE=3 SV=1
C4LUP7	Alpha-amylase family protein	EHI_023360	0.0192788	0.0686461	3.77847	30.2308	25.6012	28.9002	24.9933	28.3452	25.5463	1260000000	50900000	501000000	33400000	341000000	49000000					11	25.8	25.8	25.8	56.689	0	48.735	10	4	9	5	8	5	C4LUP7	452	>tr|C4LUP7|C4LUP7_ENTHI Alpha-amylase family protein OS=Entamoeba histolytica OX=5759 GN=EHI_023360 PE=4 SV=1
C4LUI9	Threonine dehydratase	EhTD2	0.0229522	0.0727745	3.77802	31.0479	26.4409	30.4234	26.3511	29.8901	27.2353	2220000000	91100000	1440000000	85600000	995000000	158000000					16	48	48	48	46.562	0	87.319	14	9	12	7	13	9	C4LUI9	431	>tr|C4LUI9|C4LUI9_ENTHI Threonine dehydratase OS=Entamoeba histolytica OX=5759 GN=EhTD2 PE=2 SV=1
C4MAC9	Elongation factor 1-alpha	EHI_052400	0.0149209	0.0639589	3.77648	37.8042	33.3956	37.7491	33.6944	37.1068	34.2408	240000008192	11299999744	230999998464	13900000256	147999997952	20299999232					68	79.6	79.6	14.9	48.421	0	323.31	59	40	67	41	61	38	C4MAC9	1955	>tr|C4MAC9|C4MAC9_ENTHI Elongation factor 1-alpha OS=Entamoeba histolytica OX=5759 GN=EHI_052400 PE=2 SV=1
C4LY74	Uncharacterized protein	EHI_051800	0.0623217	0.120691	3.77616	27.976	23.7796	28.4785	23.2375	27.3494	25.4583	264000000	14400000	374000000	9890000	171000000	46100000					2	3.1	3.1	3.1	81.214	0.0039954	1.8279	1	2	2	1	1	2	C4LY74	831	>tr|C4LY74|C4LY74_ENTHI Uncharacterized protein OS=Entamoeba histolytica OX=5759 GN=EHI_051800 PE=4 SV=1
C4M5T2	Ubiquitin-conjugating enzyme family protein	EHI_070750	0.00569168	0.05403	3.77604	26.9869	22.6409	27.189	23.654	26.5898	23.1426	133000000	6540000	153000000	13200000	101000000	9260000					1	5.4	5.4	5.4	16.831	0.0023516	2.0824	1	1	1	1	1	1	C4M5T2	1566	>tr|C4M5T2|C4M5T2_ENTHI Ubiquitin-conjugating enzyme family protein OS=Entamoeba histolytica OX=5759 GN=EHI_070750 PE=1 SV=1
C4M9I9	Ubiquitin-protein ligase, putative	EHI_011530	0.0211435	0.0703415	3.77136	29.7227	24.8576	28.0137	24.604	27.5315	24.4923	886000000	30400000	271000000	25500000	194000000	23600000					14	26.2	26.2	26.2	76.352	0	44.355	11	4	9	4	10	6	C4M9I9	1895	>tr|C4M9I9|C4M9I9_ENTHI Ubiquitin-protein ligase, putative OS=Entamoeba histolytica OX=5759 GN=EHI_011530 PE=4 SV=1
C4M527	Uncharacterized protein	EHI_128130	0.0252579	0.0754062	3.77109	26.4785	21.8839	25.6918	23.1143	25.6237	21.4825	93500000	3870000	54200000	9080000	51700000	2930000	+				1	2.8	2.8	2.8	62.945	1	-2	1	1	1	1	1	1	C4M527	1503	>tr|C4M527|C4M527_ENTHI Uncharacterized protein OS=Entamoeba histolytica OX=5759 GN=EHI_128130 PE=4 SV=1
Q5FZP2	p21-activated kinase	EHI_148280	0.00703765	0.0559259	3.7678	29.6458	26.2317	30.7292	26.3273	30.1604	26.673	840000000	78800000	1780000000	84200000	1200000000	107000000					18	42	42	40.3	53.023	0	72.947	9	10	18	9	15	8	Q5FZP2	2249	>tr|Q5FZP2|Q5FZP2_ENTHI p21-activated kinase OS=Entamoeba histolytica OX=5759 GN=EHI_148280 PE=2 SV=1
C4LX38	Mob1/phocein family protein	EHI_159570	0.0944177	0.160654	3.76197	25.0233	19	24.1946	22.4701	24.2096	20.6714	34100000	0	19200000	5810000	19400000	1670000					1	6.2	6.2	6.2	24.635	0	3.7035	1	0	1	1	1	1	C4LX38	721	>tr|C4LX38|C4LX38_ENTHI Mob1/phocein family protein OS=Entamoeba histolytica OX=5759 GN=EHI_159570 PE=4 SV=1
C4LX74	FeS_assembly_P domain-containing protein	EHI_013030	0.101421	0.16972	3.75599	26.3662	21.9812	25.8997	24.6375	24.6209	19	86500000	4140000	62600000	26100000	25800000	0					2	15.7	15.7	15.7	17.558	0	3.3482	2	1	2	1	1	0	C4LX74	729	>tr|C4LX74|C4LX74_ENTHI FeS_assembly_P domain-containing protein OS=Entamoeba histolytica OX=5759 GN=EHI_013030 PE=3 SV=1
C4LZ75	60S acidic ribosomal protein P1, putative	EHI_104660	0.125287	0.19919	3.75502	24.3778	19	24.6757	23.8576	24.0691	19	21800000	0	26800000	15200000	17600000	0					1	10.4	10.4	10.4	11.457	0.0055005	1.5829	1	0	1	1	1	0	C4LZ75	937	>tr|C4LZ75|C4LZ75_ENTHI 60S acidic ribosomal protein P1, putative OS=Entamoeba histolytica OX=5759 GN=EHI_104660 PE=3 SV=1
B1N401	Glycoprotein FP21, putative	EHI_065310	0.0203777	0.0701213	3.75418	25.8764	21.8689	26.0894	21.5451	25.1833	22.4726	61600000	3830000	71400000	3060000	38100000	5820000					1	6.2	6.2	6.2	18.439	0.0089852	1.3471	1	1	1	1	1	1	B1N401	103	>tr|B1N401|B1N401_ENTHI Glycoprotein FP21, putative OS=Entamoeba histolytica OX=5759 GN=EHI_065310 PE=3 SV=1
B1N3W3;C4LZF9	Calcium-dependent protein kinase 2, putative;Protein kinase, putative	EHI_137120;EHI_137980	0.00314601	0.0488391	3.7482	28.611	24.5345	28.249	24.4362	27.9705	24.6153	410000000	24300000	319000000	22700000	263000000	25700000			+	Plus DTT_Minus DTT	8	17.7	17.7	11.6	46.167	0	23.965	6	4	7	3	7	3	B1N3W3;C4LZF9;C4M6V0;C4LXP9	98	>tr|B1N3W3|B1N3W3_ENTHI Calcium-dependent protein kinase 2, putative OS=Entamoeba histolytica OX=5759 GN=EHI_137120 PE=4 SV=1;>tr|C4LZF9|C4LZF9_ENTHI Protein kinase, putative OS=Entamoeba histolytica OX=5759 GN=EHI_137980 PE=3 SV=1
C4M6X1	Nucleosome assembly protein, putative	EHI_139460	0.0460265	0.100321	3.74381	27.976	23.4425	28.0349	23.417	26.5478	24.4676	264000000	11400000	275000000	11200000	98100000	23200000					6	18.4	18.4	18.4	40.239	0	16.457	5	2	6	2	3	2	C4M6X1	1657	>tr|C4M6X1|C4M6X1_ENTHI Nucleosome assembly protein, putative OS=Entamoeba histolytica OX=5759 GN=EHI_139460 PE=3 SV=1
C4M416	Auxin efflux carrier family protein, putative	EHI_195130	0.091645	0.157047	3.74308	23.8858	22.5309	24.3578	19	23.5165	19	15500000	6060000	21500000	0	12000000	0					1	2.1	2.1	2.1	47.811	0.0011813	2.0933	1	1	1	0	1	0	C4M416	1412	>tr|C4M416|C4M416_ENTHI Auxin efflux carrier family protein, putative OS=Entamoeba histolytica OX=5759 GN=EHI_195130 PE=4 SV=1
C4MB19	Long-chain-fatty-acid--CoA ligase, putative	EHI_025090	0.0246254	0.0750771	3.73975	29.019	24.0935	28.3787	25.0975	28.1652	25.1527	544000000	17900000	349000000	35900000	301000000	37300000					13	14.3	14.3	14.3	78.691	0	21.416	13	5	9	7	10	6	C4MB19	1995	>tr|C4MB19|C4MB19_ENTHI Long-chain-fatty-acid--CoA ligase, putative OS=Entamoeba histolytica OX=5759 GN=EHI_025090 PE=4 SV=1
C4LZ37	Ran-binding protein, putative	EHI_009630	0.0257608	0.075898	3.73317	30.9259	26.0752	30.4532	26.8504	29.9814	27.2353	2040000000	70700000	1470000000	121000000	1060000000	158000000					23	25	25	25	120.11	0	122.37	19	12	21	11	19	12	C4LZ37	923	>tr|C4LZ37|C4LZ37_ENTHI Ran-binding protein, putative OS=Entamoeba histolytica OX=5759 GN=EHI_009630 PE=4 SV=1
C4M0L3	Uncharacterized protein	EHI_008370	0.211303	0.286318	3.73313	19	19	26.0995	19	23.0999	19	0	0	71900000	0	8990000	0					2	5.5	5.5	5.5	44.665	0	2.908	1	0	2	0	1	0	C4M0L3	1075	>tr|C4M0L3|C4M0L3_ENTHI Uncharacterized protein OS=Entamoeba histolytica OX=5759 GN=EHI_008370 PE=4 SV=1
B1N537	AIG1 family protein, putative	EHI_176700	0.0233294	0.0731721	3.72464	31.6022	27.2445	30.8234	26.5754	30.3515	27.7833	3260000000	159000000	1900000000	100000000	1370000000	231000000					14	32.9	32.9	14.1	34.809	0	62.357	13	7	10	6	11	9	B1N537;C4MB11	154	>tr|B1N537|B1N537_ENTHI AIG1 family protein, putative OS=Entamoeba histolytica OX=5759 GN=EHI_176700 PE=4 SV=1
C4LYP8	Uncharacterized protein	EHI_004350	0.19486	0.269778	3.72286	19	19	25.5255	19	23.6431	19	0	0	48300000	0	13100000	0					2	3.8	3.8	3.8	63.439	0	3.7625	0	0	2	0	1	0	C4LYP8	886	>tr|C4LYP8|C4LYP8_ENTHI Uncharacterized protein OS=Entamoeba histolytica OX=5759 GN=EHI_004350 PE=4 SV=1
C4LV49	WD domain containing protein	EHI_182680	0.18593	0.265083	3.71433	25.002	19	24.141	19	19	19	33600000	0	18500000	0	0	0	+				1	4.5	4.5	4.5	32.909	1	-2	1	0	1	0	0	0	C4LV49	497	>tr|C4LV49|C4LV49_ENTHI WD domain containing protein OS=Entamoeba histolytica OX=5759 GN=EHI_182680 PE=4 SV=1
C4M9X2	Uncharacterized protein	EHI_179320	0.0321679	0.0829887	3.71298	31.8422	26.7771	30.9117	27.7129	30.7373	27.8623	3849999872	115000000	2020000000	220000000	1790000000	244000000					17	24.8	24.8	24.8	56.385	0	70.921	15	8	15	9	17	11	C4M9X2	1924	>tr|C4M9X2|C4M9X2_ENTHI Uncharacterized protein OS=Entamoeba histolytica OX=5759 GN=EHI_179320 PE=4 SV=1
C4LY80;C4LUV2	Serine/threonine-protein phosphatase	EHI_051890;EHI_178880	0.0739263	0.134703	3.71104	26.7129	20.8651	25.4984	22.9298	24.976	22.2593	110000000	1910000	47400000	7990000	33000000	5020000					3	13.8	13.8	13.8	34.886	0	6.7791	3	1	2	2	2	2	C4LY80;C4LUV2	834	>tr|C4LY80|C4LY80_ENTHI Serine/threonine-protein phosphatase OS=Entamoeba histolytica OX=5759 GN=EHI_051890 PE=3 SV=1;>tr|C4LUV2|C4LUV2_ENTHI Serine/threonine-protein phosphatase OS=Entamoeba histolytica OX=5759 GN=EHI_178880 PE=3 SV=1
C4M8K8	Heat shock protein 70, putative	EHI_197860	0.00605102	0.0540667	3.7053	31.5014	27.2353	31.2365	27.6865	30.8534	27.5536	3040000000	158000000	2529999872	216000000	1940000000	197000000					28	38.8	38.8	38.8	86.354	0	54.204	17	14	21	13	23	12	C4M8K8	1808	>tr|C4M8K8|C4M8K8_ENTHI Heat shock protein 70, putative OS=Entamoeba histolytica OX=5759 GN=EHI_197860 PE=4 SV=1
C4LW39	Protein kinase, putative	EHI_141930	0.0143769	0.0629591	3.69771	29.2376	24.6486	28.6831	25.5135	28.3704	25.0359	633000000	26300000	431000000	47900000	347000000	34400000					13	26.4	26.4	26.4	58.661	0	27.564	9	6	11	8	9	6	C4LW39	616	>tr|C4LW39|C4LW39_ENTHI Protein kinase, putative OS=Entamoeba histolytica OX=5759 GN=EHI_141930 PE=4 SV=1
C4LUN8	Ras guanine nucleotide exchange factor, putative	EHI_023270	0.0390228	0.0901365	3.6881	29.94	24.7543	29.0762	26.0443	28.673	25.8264	1030000000	28300000	566000000	69200000	428000000	59500000					15	17.1	17.1	17.1	104.1	0	59.814	14	6	12	5	13	8	C4LUN8	447	>tr|C4LUN8|C4LUN8_ENTHI Ras guanine nucleotide exchange factor, putative OS=Entamoeba histolytica OX=5759 GN=EHI_023270 PE=4 SV=1
C4LTY3	Uncharacterized protein	EHI_067870	0.0799984	0.142711	3.68761	26.8504	23.9134	26.9428	21.0691	26.8504	24.5983	121000000	15800000	129000000	2200000	121000000	25400000					3	2.6	2.6	2.6	127.02	0	3.1012	2	2	3	1	3	2	C4LTY3	365	>tr|C4LTY3|C4LTY3_ENTHI Uncharacterized protein OS=Entamoeba histolytica OX=5759 GN=EHI_067870 PE=4 SV=1
C4LT06	Uncharacterized protein	EHI_148360	0.013451	0.0621874	3.68749	25.9316	21.4118	25.2856	22.2155	25.1527	21.68	64000000	2790000	40900000	4870000	37300000	3360000					1	5.9	5.9	5.9	18.416	0.0012173	2.2791	1	1	1	1	1	1	C4LT06	271	>tr|C4LT06|C4LT06_ENTHI Uncharacterized protein OS=Entamoeba histolytica OX=5759 GN=EHI_148360 PE=4 SV=1
C4LUK2	Uncharacterized protein	EHI_022890	0.0335833	0.084872	3.67803	29.4234	24.6153	29.1747	25.3712	28.5536	26.1312	720000000	25700000	606000000	43400000	394000000	73500000					5	25.7	25.7	25.7	22.512	0	20.702	5	2	5	3	5	4	C4LUK2	437	>tr|C4LUK2|C4LUK2_ENTHI Uncharacterized protein OS=Entamoeba histolytica OX=5759 GN=EHI_022890 PE=4 SV=1
Q5FM82	50S ribosomal protein L29	rpmC	0.0103637	0.0587806	3.66957	29.8112	25.4425	30.0609	26.4984	29.1771	26.0995	942000000	45600000	1120000000	94800000	607000000	71900000	+				1	10.8	10.8	10.8	7.6387	1	-2	1	1	1	1	1	1	Q5FM82	2239	>sp|Q5FM82|RL29_LACAC 50S ribosomal protein L29 OS=Lactobacillus acidophilus (strain ATCC 700396 / NCK56 / N2 / NCFM) OX=272621 GN=rpmC PE=3 SV=1
C4LXY8	Derlin	EHI_035580	0.031547	0.0825297	3.66697	23.5638	19	25.0484	20.9742	23.7695	21.4067	12400000	0	34700000	2060000	14300000	2780000					1	5.9	5.9	5.9	30.204	0	8.8589	1	0	1	1	1	1	C4LXY8	807	>tr|C4LXY8|C4LXY8_ENTHI Derlin OS=Entamoeba histolytica OX=5759 GN=EHI_035580 PE=2 SV=1
Q5FJ06	ABC transporter	LBA1499	0.0103331	0.0587806	3.66506	26.2335	22.4476	27.1507	22.9043	26.2589	23.2961	78900000	5720000	149000000	7850000	80300000	10300000	+				1	3.2	3.2	3.2	25.097	1	-2	1	1	1	1	1	1	Q5FJ06	2210	>tr|Q5FJ06|Q5FJ06_LACAC ABC transporter OS=Lactobacillus acidophilus (strain ATCC 700396 / NCK56 / N2 / NCFM) OX=272621 GN=LBA1499 PE=3 SV=1
C4M9V7	DEAD/DEAH box helicase, putative	EHI_036900	0.0140475	0.062705	3.66496	29.1435	24.604	28.7096	25.4138	28.0453	24.8858	593000000	25500000	439000000	44700000	277000000	31000000					8	27.7	25.1	23.4	47.709	0	17.384	6	3	8	5	8	3	C4M9V7	1918	>tr|C4M9V7|C4M9V7_ENTHI DEAD/DEAH box helicase, putative OS=Entamoeba histolytica OX=5759 GN=EHI_036900 PE=2 SV=1
B1N3N6	Uncharacterized protein	EHI_097980	0.127951	0.202596	3.66477	24.019	19	24.217	19	22.9225	22.1642	17000000	0	19500000	0	7950000	4700000					3	5.4	5.4	5.4	66.679	0.0012361	2.4127	1	0	2	0	2	1	B1N3N6	86	>tr|B1N3N6|B1N3N6_ENTHI Uncharacterized protein OS=Entamoeba histolytica OX=5759 GN=EHI_097980 PE=3 SV=1
C4MB14	Serine/threonine-protein kinase 3, putative	EHI_156670	0.00338492	0.0492489	3.66036	26.2262	22.1612	27.2625	23.6865	26.2589	22.9189	78500000	4690000	161000000	13500000	80300000	7930000			+	Plus DTT_Minus DTT	5	13.6	13.6	13.6	39.962	0	10.761	3	1	5	2	2	1	C4MB14	1994	>tr|C4MB14|C4MB14_ENTHI Serine/threonine-protein kinase 3, putative OS=Entamoeba histolytica OX=5759 GN=EHI_156670 PE=3 SV=1
B1N2H8	Dolichyl-diphosphooligosaccharide--protein glycosyltransferase subunit 1	EHI_045470	0.194597	0.269582	3.65983	25.4041	19	19	19	23.5754	19	44400000	0	0	0	12500000	0					1	46.5	4.5	4.5	42.355	0	27.212	1	0	1	0	1	0	B1N2H8	13	>tr|B1N2H8|B1N2H8_ENTHI Dolichyl-diphosphooligosaccharide--protein glycosyltransferase subunit 1 OS=Entamoeba histolytica OX=5759 GN=EHI_045470 PE=3 SV=1
C4M1Z8	Leucine rich repeat and phosphatase domain containing protein	EHI_165170	0.183952	0.265083	3.65188	19	19	24.6595	19	24.2961	19	0	0	26500000	0	20600000	0					1	4.5	4.5	4.5	29.903	0	3.0463	0	0	1	0	1	0	C4M1Z8	1208	>tr|C4M1Z8|C4M1Z8_ENTHI Leucine rich repeat and phosphatase domain containing protein OS=Entamoeba histolytica OX=5759 GN=EHI_165170 PE=4 SV=1
Q6AW60	EhRab11A protein	EhRAB11A	0.0331345	0.0844079	3.64968	30.6198	25.6096	29.1866	26.2856	28.9896	25.9517	1650000000	51200000	611000000	81800000	533000000	64900000					11	67.6	53.6	53.6	23.287	0	45.595	10	7	9	8	10	5	Q6AW60;Q5NT42	2271	>tr|Q6AW60|Q6AW60_ENTHI EhRab11A protein OS=Entamoeba histolytica OX=5759 GN=EhRAB11A PE=2 SV=1
C4LXC2	Importin beta-3 family protein, putative	EHI_098400	0.0194907	0.068849	3.64548	30.2308	25.558	29.4113	26.1852	29.0839	26.0464	1260000000	49400000	714000000	76300000	569000000	69300000					16	15.2	15.2	15.2	125.55	0	42.636	15	2	13	7	12	5	C4LXC2	744	>tr|C4LXC2|C4LXC2_ENTHI Importin beta-3 family protein, putative OS=Entamoeba histolytica OX=5759 GN=EHI_098400 PE=4 SV=1
C4LWE5	Uncharacterized protein	EHI_096320	0.0213407	0.0706041	3.6449	29.8638	25.1449	29.158	25.9338	29.0401	26.0484	977000000	37100000	599000000	64100000	552000000	69400000					6	36.5	36.5	36.5	24.441	0	53.84	6	3	5	3	6	3	C4LWE5	646	>tr|C4LWE5|C4LWE5_ENTHI Uncharacterized protein OS=Entamoeba histolytica OX=5759 GN=EHI_096320 PE=4 SV=1
C4M928	Protein-serine/threonine phosphatase	EHI_121510	0.189776	0.266379	3.6402	25.141	19	23.7796	19	19	19	37000000	0	14400000	0	0	0					3	7.2	7.2	7.2	49.834	0	5.0231	2	0	1	0	0	0	C4M928	1855	>tr|C4M928|C4M928_ENTHI Protein-serine/threonine phosphatase OS=Entamoeba histolytica OX=5759 GN=EHI_121510 PE=4 SV=1
C4LXC1	Uncharacterized protein	EHI_098390	0.0235464	0.0731721	3.63924	28.0349	23.2961	27.6527	24.8142	27.217	23.8764	275000000	10300000	211000000	29500000	156000000	15400000					7	11.1	11.1	11.1	69.318	0	6.7079	5	1	5	3	5	1	C4LXC1	743	>tr|C4LXC1|C4LXC1_ENTHI Uncharacterized protein OS=Entamoeba histolytica OX=5759 GN=EHI_098390 PE=4 SV=1
C4LUP4	Uncharacterized protein	EHI_023330	0.0951717	0.16169	3.63899	29.5754	23.5165	28.0813	25.5725	26.9869	24.6375	800000000	12000000	284000000	49900000	133000000	26100000					14	13.6	13.6	13.6	123.23	0	42.167	11	3	8	5	8	4	C4LUP4	451	>tr|C4LUP4|C4LUP4_ENTHI Uncharacterized protein OS=Entamoeba histolytica OX=5759 GN=EHI_023330 PE=4 SV=1
C4LTU6	MutT/nudix family protein	EHI_050760	0.205463	0.280108	3.63321	26.5551	19	25.9134	24.4105	26.0212	24.1795	98600000	0	63200000	22300000	68100000	19000000					3	8.8	8.8	8.8	33.52	0	3.5136	2	0	2	2	3	2	C4LTU6	354	>tr|C4LTU6|C4LTU6_ENTHI MutT/nudix family protein OS=Entamoeba histolytica OX=5759 GN=EHI_050760 PE=4 SV=1
C4MAU7	Protein-synthesizing GTPase	EHI_132880	0.0283689	0.0790428	3.6309	30.5389	25.6944	29.7146	26.4314	28.995	26.2299	1560000000	54300000	881000000	90500000	535000000	78700000					4	9.6	9.6	9.6	51.275	0	7.5409	4	2	4	3	3	2	C4MAU7	1982	>tr|C4MAU7|C4MAU7_ENTHI Protein-synthesizing GTPase OS=Entamoeba histolytica OX=5759 GN=EHI_132880 PE=4 SV=1
C4M1N3	Protein RER1	EHI_062460	0.139376	0.215443	3.63015	25.6649	19	25.1604	22.9316	24.6486	22.6518	53200000	0	37500000	8000000	26300000	6590000					2	17.8	17.8	17.8	20.959	0	15.179	2	0	2	1	2	1	C4M1N3	1174	>tr|C4M1N3|C4M1N3_ENTHI Protein RER1 OS=Entamoeba histolytica OX=5759 GN=EHI_062460 PE=3 SV=1
C4LZQ8	40S ribosomal protein S28, putative	EHI_038860	0.128327	0.20301	3.62806	23.895	19	24.239	19	23.391	22.6409	15600000	0	19800000	0	11000000	6540000					1	60.9	29	29	7.7349	0	10.018	1	0	1	1	1	1	C4LZQ8	981	>tr|C4LZQ8|C4LZQ8_ENTHI 40S ribosomal protein S28, putative OS=Entamoeba histolytica OX=5759 GN=EHI_038860 PE=3 SV=1
C4M777	Structural maintenance of chromosomes protein	EHI_199700	0.212613	0.287413	3.62718	25.9338	19	22.9477	19	19	19	64100000	0	8090000	0	0	0					5	3.9	3.9	3.9	143.97	0	5.4192	3	0	2	0	1	0	C4M777	1690	>tr|C4M777|C4M777_ENTHI Structural maintenance of chromosomes protein OS=Entamoeba histolytica OX=5759 GN=EHI_199700 PE=3 SV=1
C4M8B0	Ras family GTPase	EHI_058090	0.0123548	0.06208	3.62626	31.8937	27.726	32.3905	28.509	31.4581	28.6285	3990000128	222000000	5630000128	382000000	2950000128	415000000					14	53.3	53.3	31	20.536	0	80.015	14	12	13	13	13	12	C4M8B0	1780	>tr|C4M8B0|C4M8B0_ENTHI Ras family GTPase OS=Entamoeba histolytica OX=5759 GN=EHI_058090 PE=2 SV=1
C4M173;C4LXX0	GPI ethanolamine phosphate transferase 3	EHI_107320;EHI_035390	0.123528	0.197238	3.61382	28.7486	22.3672	27.4862	24.848	26.4089	24.5869	451000000	5410000	188000000	30200000	89100000	25200000					6	8.2	8.2	8.2	99.503	0	32.812	6	1	5	3	3	3	C4M173;C4LXX0	1125	>tr|C4M173|C4M173_ENTHI GPI ethanolamine phosphate transferase 3 OS=Entamoeba histolytica OX=5759 GN=EHI_107320 PE=3 SV=1;>tr|C4LXX0|C4LXX0_ENTHI GPI ethanolamine phosphate transferase 3 OS=Entamoeba histolytica OX=5759 GN=EHI_035390 PE=3 SV=1
C4M626	DNA-directed RNA polymerase subunit	EHI_125350	0.124364	0.198147	3.61115	26.3645	19.9601	25.1095	22.58	25.4041	23.5045	86400000	1020000	36200000	6270000	44400000	11900000					4	3.3	3.3	3.3	155.46	0	2.8524	2	2	2	1	3	2	C4M626	1593	>tr|C4M626|C4M626_ENTHI DNA-directed RNA polymerase subunit OS=Entamoeba histolytica OX=5759 GN=EHI_125350 PE=3 SV=1
C4M0Y3	S-phase kinase-associated protein 1A, putative	EHI_134960	0.0252992	0.0754062	3.60726	29.1771	24.5045	28.8203	25.3273	28.1361	25.48	607000000	23800000	474000000	42100000	295000000	46800000					6	43.7	43.7	43.7	18.496	0	26.219	5	2	5	3	5	3	C4M0Y3	1102	>tr|C4M0Y3|C4M0Y3_ENTHI S-phase kinase-associated protein 1A, putative OS=Entamoeba histolytica OX=5759 GN=EHI_134960 PE=3 SV=1
C4M9M2	Uncharacterized protein	EHI_112830	0.00701483	0.0559259	3.60418	28.1214	24.867	29.6948	25.4862	28.9732	25.6237	292000000	30600000	869000000	47000000	527000000	51700000					4	36.6	36.6	36.6	23.172	0	91.631	3	3	4	3	4	3	C4M9M2	1901	>tr|C4M9M2|C4M9M2_ENTHI Uncharacterized protein OS=Entamoeba histolytica OX=5759 GN=EHI_112830 PE=4 SV=1
C4M092	Palmitoyltransferase	EHI_004980	0.117445	0.189699	3.6021	28.1115	21.7955	27.6251	25.3511	27.7389	25.5225	290000000	3640000	207000000	42800000	224000000	48200000					6	25.1	25.1	25.1	32.897	0	7.8544	6	2	5	5	6	6	C4M092;C4LW58	1036	>tr|C4M092|C4M092_ENTHI Palmitoyltransferase OS=Entamoeba histolytica OX=5759 GN=EHI_004980 PE=3 SV=1
C4LUS2	START domain-containing protein	EHI_178560	0.0188451	0.0677852	3.6003	27.2262	22.9985	27.1795	23.2155	26.6865	24.0772	157000000	8380000	152000000	9740000	108000000	17700000					4	15	15	15	26.569	0	4.0083	2	3	4	1	3	3	C4LUS2	463	>tr|C4LUS2|C4LUS2_ENTHI START domain-containing protein OS=Entamoeba histolytica OX=5759 GN=EHI_178560 PE=4 SV=1
C4LVY2	PAP2_C domain-containing protein	EHI_125970	0.10957	0.180112	3.59704	24.5754	21.7675	25.1371	19	24.5045	22.6584	25000000	3570000	36900000	0	23800000	6620000					1	9.1	9.1	9.1	17.009	0.0012151	2.2715	1	1	1	1	1	1	C4LVY2	598	>tr|C4LVY2|C4LVY2_ENTHI PAP2_C domain-containing protein OS=Entamoeba histolytica OX=5759 GN=EHI_125970 PE=3 SV=1
C4M111;B1N3Q9;B1N3Y5	Geranylgeranyl pyrophosphate synthase, putative;Geranylgeranyl pyrophosphate synthetase, putative	EHI_105060;EHI_028880	0.0377035	0.0882888	3.59483	32.1783	27.189	31.5389	28.341	30.9882	28.391	4860000256	153000000	3120000000	340000000	2130000000	352000000					20	51.9	51.9	51.9	39.986	0	68.632	20	7	18	10	17	9	C4M111;B1N3Q9;B1N3Y5	1111	>tr|C4M111|C4M111_ENTHI Geranylgeranyl pyrophosphate synthase, putative OS=Entamoeba histolytica OX=5759 GN=EHI_105060 PE=3 SV=1;>tr|B1N3Q9|B1N3Q9_ENTHI Geranylgeranyl pyrophosphate synthetase, putative OS=Entamoeba histolytica OX=5759 GN=EHI_028880 PE=3 S
C4M6H3	NAD(FAD)-dependent dehydrogenase, putative	EHI_099700	0.0366999	0.087611	3.59134	35.2372	30.2308	34.3568	31.4919	34.0017	31.099	40499998720	1260000000	22000001024	3020000000	17200001024	2300000000					85	72.2	72.2	72.2	116.19	0	323.31	74	51	77	60	80	53	C4M6H3;B1N3H7	1624	>tr|C4M6H3|C4M6H3_ENTHI NAD(FAD)-dependent dehydrogenase, putative OS=Entamoeba histolytica OX=5759 GN=EHI_099700 PE=4 SV=1
B1N354	Ras-1, putative	EHI_124520	0.00901154	0.0559259	3.59104	29.94	25.7771	29.4938	25.8599	28.7357	25.7594	1030000000	57500000	756000000	60900000	447000000	56800000					10	49.5	49.5	49.5	22.741	0	30.44	8	3	9	3	5	3	B1N354	53	>tr|B1N354|B1N354_ENTHI Ras-1, putative OS=Entamoeba histolytica OX=5759 GN=EHI_124520 PE=3 SV=1
C4LY38	Uncharacterized protein	EHI_177340	0.0338402	0.0850035	3.58566	24.3778	20.6971	23.7077	19	23.391	21.0224	21800000	1700000	13700000	0	11000000	2130000					1	2.6	2.6	2.6	39.613	0.0050533	1.7035	1	1	1	0	1	1	C4LY38	823	>tr|C4LY38|C4LY38_ENTHI Uncharacterized protein OS=Entamoeba histolytica OX=5759 GN=EHI_177340 PE=4 SV=1
C4M9Z7	p-glycoprotein 5, putative	EHI_125030	0.188476	0.265725	3.58372	24.9716	19	23.7796	19	19	19	32900000	0	14400000	0	0	0	+				1	2.3	2.3	2.3	67.401	1	-2	1	0	1	0	0	0	C4M9Z7	1930	>tr|C4M9Z7|C4M9Z7_ENTHI p-glycoprotein 5, putative OS=Entamoeba histolytica OX=5759 GN=EHI_125030 PE=4 SV=1
C4LX92	Rho family GTPase	EHI_013260	0.0278466	0.0789038	3.58192	30.1115	26.3187	30.4919	25.9738	29.7502	27.3153	1160000000	83700000	1510000000	65900000	903000000	167000000					12	55.8	55.8	11.1	22.314	0	55.609	11	7	12	6	11	9	C4LX92	733	>tr|C4LX92|C4LX92_ENTHI Rho family GTPase OS=Entamoeba histolytica OX=5759 GN=EHI_013260 PE=3 SV=1
C4M2D1	Uncharacterized protein	EHI_158120	0.0479681	0.102611	3.57429	28.249	23.1991	27.4862	24.0609	27.0813	24.8336	319000000	9630000	188000000	17500000	142000000	29900000					6	12.6	12.6	12.6	58.702	0	26.982	5	2	5	3	5	4	C4M2D1	1234	>tr|C4M2D1|C4M2D1_ENTHI Uncharacterized protein OS=Entamoeba histolytica OX=5759 GN=EHI_158120 PE=4 SV=1
C4M658	Thioredoxin, putative	EHI_042900	0.00990715	0.0585237	3.56896	29.2957	25.1135	28.8534	25.2714	28.6764	25.7338	659000000	36300000	485000000	40500000	429000000	55800000					7	49.3	49.3	49.3	16.341	0	38.748	7	5	7	6	6	5	C4M658	1603	>tr|C4M658|C4M658_ENTHI Thioredoxin, putative OS=Entamoeba histolytica OX=5759 GN=EHI_042900 PE=4 SV=1
C4M6U3	Protein SEY1 homolog 2	EHI_054180	0.0341153	0.0852501	3.5676	28.49	23.5754	28.0609	25.275	27.8741	24.8717	377000000	12500000	280000000	40600000	246000000	30700000					12	14.7	14.7	14.7	96.599	0	17.184	9	3	11	6	11	4	C4M6U3;B1N586	1655	>sp|C4M6U3|SEY12_ENTHI Protein SEY1 homolog 2 OS=Entamoeba histolytica OX=5759 GN=EHI_054180 PE=3 SV=1
C4LXF0	Uncharacterized protein	EHI_130720	0.0165928	0.065918	3.56571	27.2077	22.7975	27.189	23.7077	26.3222	23.5165	155000000	7290000	153000000	13700000	83900000	12000000					5	26.5	26.5	26.5	22.765	0	6.7819	4	2	3	2	4	2	C4LXF0	757	>tr|C4LXF0|C4LXF0_ENTHI Uncharacterized protein OS=Entamoeba histolytica OX=5759 GN=EHI_130720 PE=4 SV=1
Q5FMI1	Peptide binding protein	oppA	0.130312	0.205276	3.56249	24.6096	19	23.2679	19	22.9742	22.1642	25600000	0	10100000	0	8240000	4700000					1	2.4	2.4	2.4	60.324	0.0059978	1.5062	1	0	1	0	1	1	Q5FMI1	2244	>tr|Q5FMI1|Q5FMI1_LACAC Peptide binding protein OS=Lactobacillus acidophilus (strain ATCC 700396 / NCK56 / N2 / NCFM) OX=272621 GN=oppA PE=4 SV=1
Q5NSY5	Rab family GTPase (Fragment)	EhRabX31	0.0293602	0.0798097	3.5551	29.3239	24.5285	27.8974	25.065	27.9372	24.8997	672000000	24200000	250000000	35100000	257000000	31300000					10	50.3	50.3	50.3	21.262	0	30.233	7	6	6	7	7	6	Q5NSY5	2253	>tr|Q5NSY5|Q5NSY5_ENTHI Rab family GTPase (Fragment) OS=Entamoeba histolytica OX=5759 GN=EhRabX31 PE=2 SV=1
C4M344	C2 domain containing protein	EHI_059860	0.0364078	0.087611	3.55111	31.3724	26.5725	30.933	27.4707	30.2535	27.8623	2780000000	99800000	2050000000	186000000	1280000000	244000000					7	35.1	35.1	35.1	22.138	0	60.615	6	5	7	5	6	6	C4M344	1314	>tr|C4M344|C4M344_ENTHI C2 domain containing protein OS=Entamoeba histolytica OX=5759 GN=EHI_059860 PE=4 SV=1
C4M0C2	Type A flavoprotein, putative	EHI_064530	0.065732	0.125121	3.54574	27.3239	21.8651	25.6865	23.0493	25.3778	22.8365	168000000	3820000	54000000	8680000	43600000	7490000					2	6.7	4.1	4.1	47.063	0.0012821	2.7173	2	1	1	1	1	1	C4M0C2	1045	>tr|C4M0C2|C4M0C2_ENTHI Type A flavoprotein, putative OS=Entamoeba histolytica OX=5759 GN=EHI_064530 PE=4 SV=1
C4LVZ5	Protein kinase domain containing protein	EHI_126100	0.187306	0.265083	3.54276	24.8288	19	23.7995	19	19	19	29800000	0	14600000	0	0	0	+				1	2.4	1.1	1.1	132.05	1	-2	1	0	1	0	0	0	C4LVZ5	601	>tr|C4LVZ5|C4LVZ5_ENTHI Protein kinase domain containing protein OS=Entamoeba histolytica OX=5759 GN=EHI_126100 PE=4 SV=1
C4MAX4	Vacuolar ATP synthase proteolipid subunit, putative	EHI_029370	0.132791	0.208152	3.53405	27.604	21.2125	26.673	24.3376	25.9847	24.1095	204000000	2430000	107000000	21200000	66400000	18100000					1	6.9	6.9	6.9	18.373	0	6.3557	1	1	1	1	1	1	C4MAX4	1988	>tr|C4MAX4|C4MAX4_ENTHI Vacuolar ATP synthase proteolipid subunit, putative OS=Entamoeba histolytica OX=5759 GN=EHI_029370 PE=3 SV=1
C4MAW4	Uncharacterized protein	EHI_077750	0.19284	0.267653	3.53392	19	19	23.4923	19	25.1095	19	0	0	11800000	0	36200000	0					3	4.3	4.3	2.9	93.927	0.005	1.6536	0	0	1	1	1	0	C4MAW4	1985	>tr|C4MAW4|C4MAW4_ENTHI Uncharacterized protein OS=Entamoeba histolytica OX=5759 GN=EHI_077750 PE=4 SV=1
C4M4J4	Uncharacterized protein	EHI_139040	0.0300257	0.0803448	3.53042	31.3672	26.6595	30.196	26.8858	29.8711	27.2979	2769999872	106000000	1230000000	124000000	982000000	165000000					9	17.3	17.3	17.3	56.113	0	18.843	8	6	8	6	8	8	C4M4J4	1462	>tr|C4M4J4|C4M4J4_ENTHI Uncharacterized protein OS=Entamoeba histolytica OX=5759 GN=EHI_139040 PE=4 SV=1
B1N378;B1N3M4;C4M272	S-adenosylmethionine synthase	EHI_004920;EHI_195110	0.203022	0.277629	3.52989	25.4738	19	23.1158	19	19	19	46600000	0	9090000	0	0	0					4	13.8	13.8	13.8	41.525	0	5.8898	3	0	1	1	0	0	B1N378;B1N3M4;C4M272	60	>tr|B1N378|B1N378_ENTHI S-adenosylmethionine synthase OS=Entamoeba histolytica OX=5759 GN=EHI_004920 PE=3 SV=1;>tr|B1N3M4|B1N3M4_ENTHI S-adenosylmethionine synthase OS=Entamoeba histolytica OX=5759 GN=EHI_195110 PE=3 SV=1;>tr|C4M272|C4M272_ENTHI S-adenosyl
C4M310	Ubiquitin-conjugating enzyme family protein	EHI_025230	0.0299772	0.0803116	3.52798	28.4823	25.3307	29.5772	24.8288	28.4785	25.7945	375000000	42200000	801000000	29800000	374000000	58200000					4	36.2	36.2	36.2	17.361	0	20.265	4	2	4	2	4	2	C4M310	1307	>tr|C4M310|C4M310_ENTHI Ubiquitin-conjugating enzyme family protein OS=Entamoeba histolytica OX=5759 GN=EHI_025230 PE=4 SV=1
B1N2G7	Non-specific serine/threonine protein kinase	EHI_044470	0.0359954	0.0873244	3.52295	26.317	21.4825	25.5014	22.2792	25.002	22.4898	83600000	2930000	47500000	5090000	33600000	5890000					3	9.5	9.5	9.5	50.661	0	4.1838	3	1	3	1	2	1	B1N2G7	11	>tr|B1N2G7|B1N2G7_ENTHI Non-specific serine/threonine protein kinase OS=Entamoeba histolytica OX=5759 GN=EHI_044470 PE=3 SV=1
C4M705	Uncharacterized protein	EHI_057700	0.0351415	0.0865473	3.5222	27.3066	22.6562	27.3494	23.7389	26.5374	24.2317	166000000	6610000	171000000	14000000	97400000	19700000					3	6.8	6.8	6.8	43.924	0	18.232	3	1	3	1	3	2	C4M705	1668	>tr|C4M705|C4M705_ENTHI Uncharacterized protein OS=Entamoeba histolytica OX=5759 GN=EHI_057700 PE=2 SV=1
B1N2P9	Phospholipid-transporting ATPase	EHI_197300	0.00378285	0.0496409	3.51206	24.7895	21.7098	25.1253	21.4221	24.8288	21.0756	29000000	3430000	36600000	2810000	29800000	2210000			+	Plus DTT_Minus DTT	1	0.9	0.9	0.9	122.65	0.0058981	1.4262	1	1	1	1	1	1	B1N2P9	28	>tr|B1N2P9|B1N2P9_ENTHI Phospholipid-transporting ATPase OS=Entamoeba histolytica OX=5759 GN=EHI_197300 PE=3 SV=1
C4LY53	Uncharacterized protein	EHI_177500	0.0509655	0.106141	3.50941	30.5933	25.7182	29.2239	25.5983	28.9814	26.9539	1620000000	55200000	627000000	50800000	530000000	130000000					8	28	28	28	24.516	0	60.47	8	4	6	4	6	7	C4LY53	827	>tr|C4LY53|C4LY53_ENTHI Uncharacterized protein OS=Entamoeba histolytica OX=5759 GN=EHI_177500 PE=4 SV=1
C4M1X4	AP-3 complex subunit delta	EHI_164810	0.0695375	0.129058	3.50898	31.4433	26.0359	30.1239	27.965	30.196	27.2353	2920000000	68800000	1170000000	262000000	1230000000	158000000					20	22.8	22.8	22.8	115.62	0	141.95	19	8	15	11	17	10	C4M1X4;B1N5U8	1198	>tr|C4M1X4|C4M1X4_ENTHI AP-3 complex subunit delta OS=Entamoeba histolytica OX=5759 GN=EHI_164810 PE=3 SV=1
C4M7K8	Uncharacterized protein	EHI_170410	0.078713	0.141151	3.50825	25.0609	23.0854	24.9847	21.9459	24.5105	19	35000000	8900000	33200000	4040000	23900000	0	+				1	3	3	3	26.928	1	-2	1	1	1	1	1	0	C4M7K8	1726	>tr|C4M7K8|C4M7K8_ENTHI Uncharacterized protein OS=Entamoeba histolytica OX=5759 GN=EHI_170410 PE=4 SV=1
C4LZN1	Uncharacterized protein	EHI_175060	0.0371058	0.0877893	3.50132	27.0296	22.3538	26.4769	22.9225	25.9495	23.6757	137000000	5360000	93400000	7950000	64800000	13400000					3	12.1	12.1	12.1	29.488	0	10.603	2	1	2	2	3	3	C4LZN1	978	>tr|C4LZN1|C4LZN1_ENTHI Uncharacterized protein OS=Entamoeba histolytica OX=5759 GN=EHI_175060 PE=4 SV=1
C4LY36	26S protease regulatory subunit, putative	EHI_177320	0.0258458	0.0759318	3.49752	29.1984	25.0105	28.632	24.6865	28.2262	25.867	616000000	33800000	416000000	27000000	314000000	61200000					11	38	38	38	43.782	0	41.817	8	6	10	4	10	6	C4LY36	822	>tr|C4LY36|C4LY36_ENTHI 26S protease regulatory subunit, putative OS=Entamoeba histolytica OX=5759 GN=EHI_177320 PE=2 SV=1
C4M541	HEAT repeat domain containing protein	EHI_078260	0.0131662	0.0620854	3.49385	31.5573	27.391	31.1239	27.5754	30.7373	27.9705	3160000000	176000000	2340000000	200000000	1790000000	263000000					49	25.2	25.2	25.2	237.81	0	182.91	35	23	39	24	40	26	C4M541	1506	>tr|C4M541|C4M541_ENTHI HEAT repeat domain containing protein OS=Entamoeba histolytica OX=5759 GN=EHI_078260 PE=3 SV=1
C4M7D4	Elongation factor 1-alpha	EHI_011210	0.0167087	0.065918	3.49268	34.9848	30.8682	35.0793	31.3196	34.1453	31.5435	33999998976	1960000000	36300001280	2680000000	19000000512	3129999872					5	79.6	14.9	14.9	48.417	0	199.64	5	4	5	4	5	4	C4M7D4	1709	>tr|C4M7D4|C4M7D4_ENTHI Elongation factor 1-alpha OS=Entamoeba histolytica OX=5759 GN=EHI_011210 PE=2 SV=1
C4M1E0	Uncharacterized protein	EHI_170180	0.131826	0.207229	3.48923	29.2803	26.3393	28.524	22.3645	28.5933	27.2262	652000000	84900000	386000000	5400000	405000000	157000000					5	1.8	1.8	1.8	270.42	0.0012453	2.4643	4	1	3	1	3	3	C4M1E0	1142	>tr|C4M1E0|C4M1E0_ENTHI Uncharacterized protein OS=Entamoeba histolytica OX=5759 GN=EHI_170180 PE=3 SV=1
C4M7U7	Uncharacterized protein	EHI_020350	0.0430708	0.0960048	3.48599	26.452	21.4775	26.9316	24.317	26.8623	23.9933	91800000	2920000	128000000	20900000	122000000	16700000					3	15.1	15.1	15.1	26.287	0	5.8743	1	1	2	2	2	2	C4M7U7	1742	>tr|C4M7U7|C4M7U7_ENTHI Uncharacterized protein OS=Entamoeba histolytica OX=5759 GN=EHI_020350 PE=2 SV=1
C4M672	Serine/threonine-protein phosphatase	EHI_117570	0.0478942	0.102552	3.48238	28.5278	23.4676	27.8623	25.2643	27.7517	24.9628	387000000	11600000	244000000	40300000	226000000	32700000					5	13.2	13.2	13.2	48.94	0	29.877	5	2	4	4	5	3	C4M672	1606	>tr|C4M672|C4M672_ENTHI Serine/threonine-protein phosphatase OS=Entamoeba histolytica OX=5759 GN=EHI_117570 PE=3 SV=1
C4M965	Heat shock protein, putative	EHI_135750	0.18386	0.265083	3.4823	24.3778	19	19	19	24.0691	19	21800000	0	0	0	17600000	0	+				1	1.3	1.3	1.3	73.526	1	-2	1	0	0	0	1	0	C4M965	1869	>tr|C4M965|C4M965_ENTHI Heat shock protein, putative OS=Entamoeba histolytica OX=5759 GN=EHI_135750 PE=4 SV=1
C4LVX8	Protein kinase, putative	EHI_125930	0.359667	0.440736	3.48095	27.8264	21.0088	27.2445	21.2125	19	21.4067	238000000	2110000	159000000	2430000	0	2780000					3	4.7	4.7	4.7	83.854	0	3.8131	1	1	1	1	0	2	C4LVX8	595	>tr|C4LVX8|C4LVX8_ENTHI Protein kinase, putative OS=Entamoeba histolytica OX=5759 GN=EHI_125930 PE=3 SV=1
C4M3R0	Rho family GTPase	EHI_146180	0.0542974	0.110468	3.47002	29.4073	25.1565	29.1984	24.824	27.189	25.4041	712000000	37400000	616000000	29700000	153000000	44400000					3	10.2	10.2	5.1	24.04	0	4.4816	2	2	2	2	2	2	C4M3R0	1373	>tr|C4M3R0|C4M3R0_ENTHI Rho family GTPase OS=Entamoeba histolytica OX=5759 GN=EHI_146180 PE=2 SV=1
B1N4D4	PH domain containing protein	EHI_192960	0.0206234	0.0702577	3.46811	30.2979	25.9338	29.6663	26.239	29.217	26.604	1320000000	64100000	852000000	79200000	624000000	102000000					12	22	22	22	64.397	0	21.357	9	6	10	7	9	7	B1N4D4	123	>tr|B1N4D4|B1N4D4_ENTHI PH domain containing protein OS=Entamoeba histolytica OX=5759 GN=EHI_192960 PE=4 SV=1
C4M1I7	LIM zinc finger domain containing protein	EHI_001070	0.0990604	0.16652	3.4667	31.2077	25.3943	28.6146	26.0935	28.5609	26.4953	2480000000	44100000	411000000	71600000	396000000	94600000					21	49.1	49.1	49.1	43.951	0	43.918	19	5	11	8	12	11	C4M1I7	1157	>tr|C4M1I7|C4M1I7_ENTHI LIM zinc finger domain containing protein OS=Entamoeba histolytica OX=5759 GN=EHI_001070 PE=4 SV=1
B1N3D5	Leucine-rich repeat containing protein	EHI_164460	0.0356662	0.087134	3.46158	29.7357	25.019	28.5352	25.2856	27.7389	25.3204	894000000	34000000	389000000	40900000	224000000	41900000					12	16	16	15	83.159	0	33.323	12	4	10	4	8	6	B1N3D5	71	>tr|B1N3D5|B1N3D5_ENTHI Leucine-rich repeat containing protein OS=Entamoeba histolytica OX=5759 GN=EHI_164460 PE=4 SV=1
C4LSR6	Serine palmitoyltransferase, putative	EHI_152280	0.0917342	0.157047	3.45788	32.4483	26.7389	31.1544	28.7581	30.7771	28.509	5859999744	112000000	2390000128	454000000	1840000000	382000000					33	39.6	39.6	39.6	98.116	0	199.63	33	17	28	22	26	19	C4LSR6;C4LWL9	240	>tr|C4LSR6|C4LSR6_ENTHI Serine palmitoyltransferase, putative OS=Entamoeba histolytica OX=5759 GN=EHI_152280 PE=3 SV=1
C4LUP2	RING zinc finger protein, putative	EHI_023310	0.185014	0.265083	3.45514	19	19	24.4984	19	23.867	19	0	0	23700000	0	15300000	0					1	1.2	1.2	1.2	70.695	0.0060076	1.5189	0	0	1	0	1	0	C4LUP2	449	>tr|C4LUP2|C4LUP2_ENTHI RING zinc finger protein, putative OS=Entamoeba histolytica OX=5759 GN=EHI_023310 PE=4 SV=1
C4M2V8	Uncharacterized protein	EHI_188910	0.0453706	0.0994405	3.45155	28.2216	23.2679	27.9146	25.4298	27.8019	24.8858	313000000	10100000	253000000	45200000	234000000	31000000					11	17.5	5.8	5.8	238.85	0	14.769	5	3	7	3	9	4	C4M2V8	1289	>tr|C4M2V8|C4M2V8_ENTHI Uncharacterized protein OS=Entamoeba histolytica OX=5759 GN=EHI_188910 PE=4 SV=1
C4M550	Uncharacterized protein	EHI_078310	0.00581195	0.05403	3.45095	29.5352	25.8694	29.1819	25.4202	29.0349	26.1095	778000000	61300000	609000000	44900000	550000000	72400000					3	6.3	6.3	6.3	50.416	0	20.952	3	3	3	3	3	3	C4M550	1510	>tr|C4M550|C4M550_ENTHI Uncharacterized protein OS=Entamoeba histolytica OX=5759 GN=EHI_078310 PE=4 SV=1
C4M3A8	Inositol-1-monophosphatase	EHI_175410	0.0268708	0.0776848	3.44549	27.3494	22.7512	26.4661	23.5754	26.3153	23.4676	171000000	7060000	92700000	12500000	83500000	11600000					4	15.3	15.3	15.3	32.945	0	15.677	4	2	3	3	3	3	C4M3A8	1329	>tr|C4M3A8|C4M3A8_ENTHI Inositol-1-monophosphatase OS=Entamoeba histolytica OX=5759 GN=EHI_175410 PE=3 SV=1
C4M419;B1N453	T-complex protein 1 subunit delta;T-complex protein 1 subunit delta, putative	EHI_114120;EHI_091130	0.00357067	0.049299	3.44228	30.1361	26.9316	31.2193	27.3662	30.8081	27.5389	1180000000	128000000	2500000000	173000000	1880000000	195000000			+	Plus DTT_Minus DTT	21	53.9	53.9	53.9	58.188	0	172.31	13	11	21	12	19	15	C4M419;B1N453	1414	>tr|C4M419|C4M419_ENTHI T-complex protein 1 subunit delta OS=Entamoeba histolytica OX=5759 GN=EHI_114120 PE=3 SV=1;>tr|B1N453|B1N453_ENTHI T-complex protein 1 subunit delta, putative OS=Entamoeba histolytica OX=5759 GN=EHI_091130 PE=3 SV=1
C4LWS1	Polyadenylate-binding protein, putative	EHI_198750	0.0848095	0.148734	3.43677	30.7533	25.3273	30.1239	26.9977	29.4512	27.6931	1810000000	42100000	1170000000	134000000	734000000	217000000					16	31.5	31.5	31.5	60.23	0	75.456	14	5	15	8	13	9	C4LWS1	683	>tr|C4LWS1|C4LWS1_ENTHI Polyadenylate-binding protein, putative OS=Entamoeba histolytica OX=5759 GN=EHI_198750 PE=4 SV=1
C4M4H1	Aminoacyl-histidine dipeptidase, putative	EHI_042170	0.0184769	0.067458	3.43328	33.3169	28.9372	32.901	29.9539	32.7088	29.7357	10700000256	514000000	8019999744	1040000000	7020000256	894000000					22	39	39	39	56.919	0	117.97	20	13	21	16	21	15	C4M4H1	1455	>tr|C4M4H1|C4M4H1_ENTHI Aminoacyl-histidine dipeptidase, putative OS=Entamoeba histolytica OX=5759 GN=EHI_042170 PE=2 SV=1
C4LUT6	Uncharacterized protein	EHI_178720	0.00690808	0.0559259	3.42538	26.8385	22.9207	26.9539	24.0275	26.0212	22.5892	120000000	7940000	130000000	17100000	68100000	6310000					8	3.6	3.6	2.9	227.9	0	12.975	4	2	7	3	6	2	C4LUT6	468	>tr|C4LUT6|C4LUT6_ENTHI Uncharacterized protein OS=Entamoeba histolytica OX=5759 GN=EHI_178720 PE=4 SV=1
C4LS87	Uncharacterized protein	EHI_152940	0.116477	0.188683	3.42097	26.8385	20.9024	23.3778	21.6497	24.4676	21.8689	120000000	1960000	10900000	3290000	23200000	3830000					2	2	2	2	123.95	0	5.9377	2	1	1	1	2	1	C4LS87	181	>tr|C4LS87|C4LS87_ENTHI Uncharacterized protein OS=Entamoeba histolytica OX=5759 GN=EHI_152940 PE=4 SV=1
C4LYX3;Q5NT13	Rab family GTPase;Rab family GTPase (Fragment)	EHI_117890;EhRabP1	0.00405182	0.0515364	3.42077	26.1352	22.5309	26.0422	22.3699	26.1095	23.1238	73700000	6060000	69100000	5420000	72400000	9140000					4	23.6	23.6	23.6	22.869	0	7.4573	3	2	3	1	4	2	C4LYX3;Q5NT13	905	>tr|C4LYX3|C4LYX3_ENTHI Rab family GTPase OS=Entamoeba histolytica OX=5759 GN=EHI_117890 PE=3 SV=1;>tr|Q5NT13|Q5NT13_ENTHI Rab family GTPase (Fragment) OS=Entamoeba histolytica OX=5759 GN=EhRabP1 PE=3 SV=1
C4LXD2	Uncharacterized protein	EHI_098520	0.00314638	0.0488391	3.41932	22.4923	19	22.7098	19	22.0559	19	5900000	0	6860000	0	4360000	0			+	Plus DTT_Minus DTT	2	9.5	9.5	9.5	33.235	0	3.4616	1	0	2	0	1	0	C4LXD2	751	>tr|C4LXD2|C4LXD2_ENTHI Uncharacterized protein OS=Entamoeba histolytica OX=5759 GN=EHI_098520 PE=4 SV=1
C4M162	NADP-dependent alcohol dehydrogenase, putative	EHI_107210	0.0263768	0.0766382	3.41829	29.3324	24.9406	28.7292	25.2961	28.249	25.8191	676000000	32200000	445000000	41200000	319000000	59200000					8	26.4	24.5	24.5	39.649	0	34.369	7	4	6	4	7	4	C4M162	1123	>tr|C4M162|C4M162_ENTHI NADP-dependent alcohol dehydrogenase, putative OS=Entamoeba histolytica OX=5759 GN=EHI_107210 PE=2 SV=1
C4LVT1	B30.2/SPRY domain-containing protein	EHI_187140	0.183679	0.265083	3.41691	19	19	24.2317	19	24.019	19	0	0	19700000	0	17000000	0					1	3.4	3.4	3.4	37.264	0.005531	1.6254	0	0	1	0	1	0	C4LVT1	580	>tr|C4LVT1|C4LVT1_ENTHI B30.2/SPRY domain-containing protein OS=Entamoeba histolytica OX=5759 GN=EHI_187140 PE=2 SV=1
C4LXS2	Patatin-like phospholipase, putative	EHI_014360	0.066436	0.126138	3.41417	24.2679	19	23.5638	21.0756	23.4676	20.9812	20200000	0	12400000	2210000	11600000	2070000					1	2.1	2.1	2.1	55.509	0.0059685	1.4794	1	0	1	1	1	1	C4LXS2	792	>tr|C4LXS2|C4LXS2_ENTHI Patatin-like phospholipase, putative OS=Entamoeba histolytica OX=5759 GN=EHI_014360 PE=4 SV=1
C4LSK4	RING finger protein, putative	EHI_151630	0.135486	0.211256	3.41358	25.2096	19	25.9912	24.1871	25.6181	23.391	38800000	0	66700000	19100000	51500000	11000000					3	27.7	27.7	27.7	10.791	0	6.6184	1	0	2	2	2	1	C4LSK4	222	>tr|C4LSK4|C4LSK4_ENTHI RING finger protein, putative OS=Entamoeba histolytica OX=5759 GN=EHI_151630 PE=4 SV=1
C4M8W4	Uncharacterized protein	EHI_113980	0.18729	0.265083	3.41017	24.6096	19	23.6209	19	19	19	25600000	0	12900000	0	0	0					1	3.4	3.4	3.4	30.661	0.0012085	2.2185	1	0	1	0	1	0	C4M8W4	1838	>tr|C4M8W4|C4M8W4_ENTHI Uncharacterized protein OS=Entamoeba histolytica OX=5759 GN=EHI_113980 PE=4 SV=1
C4M4D9	Non-specific serine/threonine protein kinase	EHI_156390	0.18774	0.26536	3.40631	19	19	24.632	19	23.5869	19	0	0	26000000	0	12600000	0					1	4.9	4.9	4.9	36.124	0.0059395	1.4521	0	0	1	0	1	0	C4M4D9	1446	>tr|C4M4D9|C4M4D9_ENTHI Non-specific serine/threonine protein kinase OS=Entamoeba histolytica OX=5759 GN=EHI_156390 PE=3 SV=1
Q27648	Phosphotransferase	HXK2	0.0420166	0.0946583	3.40504	29.6527	24.867	29.0084	25.9338	28.4862	26.1312	844000000	30600000	540000000	64100000	376000000	73500000					7	56.4	22	22	49.419	0	72.577	7	3	6	4	6	4	Q27648	2188	>tr|Q27648|Q27648_ENTHI Phosphotransferase OS=Entamoeba histolytica OX=5759 GN=HXK2 PE=2 SV=1
C4LU09	Tyrosine kinase, putative	EHI_068160	0.0538	0.109983	3.40481	29.49	24.4551	27.673	24.8811	28.1214	25.7338	754000000	23000000	214000000	30900000	292000000	55800000					17	9.6	9.6	9.6	241.7	0	32.97	14	5	10	6	11	8	C4LU09	375	>tr|C4LU09|C4LU09_ENTHI Tyrosine kinase, putative OS=Entamoeba histolytica OX=5759 GN=EHI_068160 PE=4 SV=1
Q86S08;C4LSV1	Malate dehydrogenase	Mdh1;EHI_152670	0.00703886	0.0559259	3.40183	30.7771	26.9203	30.4532	26.976	30.5844	27.7129	1840000000	127000000	1470000000	132000000	1610000000	220000000					11	31.5	31.5	31.5	39.284	0	53.55	10	9	10	9	10	9	Q86S08;C4LSV1	2287	>tr|Q86S08|Q86S08_ENTHI Malate dehydrogenase OS=Entamoeba histolytica OX=5759 GN=Mdh1 PE=2 SV=1;>tr|C4LSV1|C4LSV1_ENTHI Malate dehydrogenase OS=Entamoeba histolytica OX=5759 GN=EHI_152670 PE=2 SV=1
C4M2K7	Methionyl-tRNA synthetase	EHI_079860	0.0424988	0.0953976	3.40157	32.5412	27.7453	31.3088	28.2625	30.8829	28.5203	6249999872	225000000	2660000000	322000000	1980000000	385000000					39	48.3	48.3	36.3	85.102	0	184.52	34	22	34	23	30	22	C4M2K7	1258	>tr|C4M2K7|C4M2K7_ENTHI Methionyl-tRNA synthetase OS=Entamoeba histolytica OX=5759 GN=EHI_079860 PE=3 SV=1
C4M989	Leucine-rich repeat containing protein	EHI_119950	0.0351937	0.0865473	3.39418	26.8385	22.1363	26.1312	23.417	26.4202	23.654	120000000	4610000	73500000	11200000	89800000	13200000					5	13.1	13.1	13.1	40.518	0	10.66	2	1	3	2	4	2	C4M989	1876	>tr|C4M989|C4M989_ENTHI Leucine-rich repeat containing protein OS=Entamoeba histolytica OX=5759 GN=EHI_119950 PE=2 SV=1
C4LVV8	Uncharacterized protein	EHI_125710	0.0626217	0.121061	3.39226	28.0453	22.928	26.4473	23.5285	24.8858	22.7451	277000000	7980000	91500000	12100000	31000000	7030000					4	13.9	13.9	13.9	34.46	0	15.854	4	2	3	2	2	1	C4LVV8	587	>tr|C4LVV8|C4LVV8_ENTHI Uncharacterized protein OS=Entamoeba histolytica OX=5759 GN=EHI_125710 PE=4 SV=1
C4M1Q8	GlcNAc-1-P transferase	EHI_062840	0.00701633	0.0559259	3.39145	25.772	21.8764	26.189	23.2821	26.0105	22.6387	57300000	3850000	76500000	10200000	67600000	6530000					1	2.5	2.5	2.5	41.108	0.002346	2.0609	1	1	1	1	1	1	C4M1Q8	1179	>tr|C4M1Q8|C4M1Q8_ENTHI GlcNAc-1-P transferase OS=Entamoeba histolytica OX=5759 GN=EHI_062840 PE=3 SV=1
C4LU80	LIM zinc finger domain containing protein	EHI_110280	0.044926	0.0988214	3.39068	31.7047	28.2216	31.8196	27.189	30.9814	28.9231	3500000000	313000000	3790000128	153000000	2120000000	509000000					13	41.2	41.2	41.2	32.824	0	80.18	11	10	12	8	11	10	C4LU80	400	>tr|C4LU80|C4LU80_ENTHI LIM zinc finger domain containing protein OS=Entamoeba histolytica OX=5759 GN=EHI_110280 PE=2 SV=1
B1N2P0	Actin	EHI_107290	0.00483196	0.0515735	3.38963	38.0872	34.4943	38.294	34.6361	37.903	34.9848	292000006144	24199999488	337000005632	26699999232	256999997440	33999998976					50	85.4	85.4	16.2	42.03	0	323.31	46	36	49	35	47	35	B1N2P0;B1N5D1	27	>tr|B1N2P0|B1N2P0_ENTHI Actin OS=Entamoeba histolytica OX=5759 GN=EHI_107290 PE=2 SV=1
B1N4P9;C4LVJ7	DNA primase small subunit (Fragment);DNA primase	EHI_129630;EHI_103530	0.188123	0.265564	3.38894	24.6264	19	19	19	23.5404	19	25900000	0	0	0	12200000	0					1	4.8	4.8	4.8	22.479	0.0011834	2.1042	1	0	0	0	1	0	B1N4P9;C4LVJ7	141	>tr|B1N4P9|B1N4P9_ENTHI DNA primase small subunit (Fragment) OS=Entamoeba histolytica OX=5759 GN=EHI_129630 PE=3 SV=1;>tr|C4LVJ7|C4LVJ7_ENTHI DNA primase OS=Entamoeba histolytica OX=5759 GN=EHI_103530 PE=3 SV=1
C4LVM7	Proteasome regulatory subunit, putative	EHI_103850	0.333465	0.41386	3.38619	19	20.9459	25.4892	19	24.6153	19	0	2020000	47100000	0	25700000	0					3	7.7	7.7	7.7	43.809	0	4.6991	1	1	2	0	1	1	C4LVM7;B1N4C1	556	>tr|C4LVM7|C4LVM7_ENTHI Proteasome regulatory subunit, putative OS=Entamoeba histolytica OX=5759 GN=EHI_103850 PE=4 SV=1
C4M8T2	Long-chain-fatty-acid--CoA ligase, putative	EHI_147010	0.0201146	0.069946	3.38612	32.0512	27.7064	31.6154	28.5536	31.0927	28.341	4449999872	219000000	3289999872	394000000	2289999872	340000000					30	40	40	40	77.3	0	99.059	28	14	24	19	24	18	C4M8T2	1825	>tr|C4M8T2|C4M8T2_ENTHI Long-chain-fatty-acid--CoA ligase, putative OS=Entamoeba histolytica OX=5759 GN=EHI_147010 PE=4 SV=1
C4M6P7	Protein kinase domain containing protein	EHI_201080	0.0674226	0.127112	3.3778	27.9923	22.7655	26.976	24.5225	26.7771	24.3239	267000000	7130000	132000000	24100000	115000000	21000000					4	2.3	2.3	1.2	145.75	0.0059913	1.5039	3	1	3	2	3	2	C4M6P7	1645	>tr|C4M6P7|C4M6P7_ENTHI Protein kinase domain containing protein OS=Entamoeba histolytica OX=5759 GN=EHI_201080 PE=4 SV=1
C4M3B1	Non-transporter ABC protein, putative	EHI_175440	0.00203377	0.0487947	3.37542	27.5315	23.9933	27.7195	24.2021	27.2803	24.2096	194000000	16700000	221000000	19300000	163000000	19400000			+	Plus DTT_Minus DTT	5	9	9	9	83.317	0	10.471	5	2	4	2	4	3	C4M3B1	1330	>tr|C4M3B1|C4M3B1_ENTHI Non-transporter ABC protein, putative OS=Entamoeba histolytica OX=5759 GN=EHI_175440 PE=4 SV=1
C4M6A4	Acetyl-CoA carboxytransferase	EHI_082530	0.0371795	0.0877893	3.37097	30.8004	26.1015	30.0349	27.189	29.8035	27.2353	1870000000	72000000	1100000000	153000000	937000000	158000000					21	17.8	17.8	17.8	138.01	0	51.938	19	9	16	13	15	12	C4M6A4	1613	>tr|C4M6A4|C4M6A4_ENTHI Acetyl-CoA carboxytransferase OS=Entamoeba histolytica OX=5759 GN=EHI_082530 PE=4 SV=1
C4M2C4	Hsc70-interacting protein, putative	EHI_158050	0.00321868	0.0488391	3.36088	31.8081	28.066	32.1513	29.0057	31.6022	28.4073	3760000000	281000000	4769999872	539000000	3260000000	356000000			+	Plus DTT_Minus DTT	19	42.6	42.6	42.6	40.13	0	147.19	13	10	19	11	17	9	C4M2C4	1233	>tr|C4M2C4|C4M2C4_ENTHI Hsc70-interacting protein, putative OS=Entamoeba histolytica OX=5759 GN=EHI_158050 PE=2 SV=1
C4M7D1	Protein kinase domain containing protein	EHI_011180	0.216278	0.291641	3.35952	25.1908	19	23.0935	19	23.7077	23.9134	38300000	0	8950000	0	13700000	15800000					3	4.8	4.8	4.8	66.42	0	2.8583	2	0	1	0	1	1	C4M7D1	1707	>tr|C4M7D1|C4M7D1_ENTHI Protein kinase domain containing protein OS=Entamoeba histolytica OX=5759 GN=EHI_011180 PE=4 SV=1
Q5FLS6	Aldehyde-alcohol dehydrogenase	adhE	0.00193609	0.0487947	3.35907	31.6501	28.2803	30.9117	27.8142	30.9677	27.3578	3369999872	326000000	2020000000	236000000	2100000000	172000000			+	Plus DTT_Minus DTT	1	1.1	1.1	1.1	96.067	0.0034843	1.9636	1	1	1	1	1	1	Q5FLS6	2236	>tr|Q5FLS6|Q5FLS6_LACAC Aldehyde-alcohol dehydrogenase OS=Lactobacillus acidophilus (strain ATCC 700396 / NCK56 / N2 / NCFM) OX=272621 GN=adhE PE=3 SV=1
C4M8K6;C4M5Z7	Rho family GTPase	EHI_197840;EHI_181250	0.016535	0.065918	3.35573	31.8974	28.8415	32.9295	28.7129	32.3828	29.588	4000000000	481000000	8179999744	440000000	5600000000	807000000					13	50.3	50.3	50.3	21.584	0	30.606	11	8	11	7	10	8	C4M8K6;C4M5Z7;C4M468	1586	>tr|C4M8K6|C4M8K6_ENTHI Rho family GTPase OS=Entamoeba histolytica OX=5759 GN=EHI_197840 PE=3 SV=1;>tr|C4M5Z7|C4M5Z7_ENTHI Rho family GTPase OS=Entamoeba histolytica OX=5759 GN=EHI_181250 PE=3 SV=1
C4M1U1	Uncharacterized protein	EHI_027530	0.020707	0.0702577	3.35473	28.611	24.391	27.9031	24.5812	27.8564	25.3342	410000000	22000000	251000000	25100000	243000000	42300000					3	9.6	9.6	9.6	42.454	0	36.875	3	2	3	3	3	2	C4M1U1	1189	>tr|C4M1U1|C4M1U1_ENTHI Uncharacterized protein OS=Entamoeba histolytica OX=5759 GN=EHI_027530 PE=4 SV=1
C4M8B2	Uncharacterized protein	EHI_058110	0.183577	0.265083	3.35061	19	19	23.9584	19	24.0935	19	0	0	16300000	0	17900000	0	+				1	1.8	1.8	1.8	70.554	1	-2	0	0	1	0	1	0	C4M8B2	1781	>tr|C4M8B2|C4M8B2_ENTHI Uncharacterized protein OS=Entamoeba histolytica OX=5759 GN=EHI_058110 PE=4 SV=1
C4M4K7	Signal peptidase, putative	EHI_031250	0.0374421	0.0880363	3.34148	29.2759	24.6971	28.8203	25.673	28.1795	25.8811	650000000	27200000	474000000	53500000	304000000	61800000					3	8.5	8.5	8.5	38.18	0	9.2521	3	2	3	3	3	3	C4M4K7	1467	>tr|C4M4K7|C4M4K7_ENTHI Signal peptidase, putative OS=Entamoeba histolytica OX=5759 GN=EHI_031250 PE=3 SV=1
C4M8C8	Rho guanine nucleotide exchange factor, putative	EHI_039480	0.0390764	0.0901669	3.34025	28.267	24.0526	28.1507	24.3444	27.3066	25.3066	323000000	17400000	298000000	21300000	166000000	41500000					11	14.4	14.4	14.4	95.96	0	41.497	7	5	9	2	7	5	C4M8C8;C4LV55	1786	>tr|C4M8C8|C4M8C8_ENTHI Rho guanine nucleotide exchange factor, putative OS=Entamoeba histolytica OX=5759 GN=EHI_039480 PE=4 SV=1
C4M4G0	Vacuolar protein sorting 35, putative	EHI_041950	0.025159	0.0754062	3.33824	31.8385	27.4314	31.6544	28.7195	31.3356	28.6629	3840000000	181000000	3380000000	442000000	2710000128	425000000					31	39.4	39.4	39.4	85.142	0	236.27	27	16	28	22	26	21	C4M4G0	1451	>tr|C4M4G0|C4M4G0_ENTHI Vacuolar protein sorting 35, putative OS=Entamoeba histolytica OX=5759 GN=EHI_041950 PE=3 SV=1
C4M5N8	Uncharacterized protein	EHI_040610	0.0287482	0.0794323	3.33578	26.0338	22.1581	26.0464	22.0951	25.3135	23.1332	68700000	4680000	69300000	4480000	41700000	9200000					2	8.5	8.5	8.5	24.639	0	4.5615	2	1	2	1	2	1	C4M5N8	1556	>tr|C4M5N8|C4M5N8_ENTHI Uncharacterized protein OS=Entamoeba histolytica OX=5759 GN=EHI_040610 PE=4 SV=1
C4M0M6	60S ribosomal protein L17, putative	EHI_008620	0.00578495	0.05403	3.33371	26.5285	23.3101	26.8264	23.0054	26.2856	23.3239	96800000	10400000	119000000	8420000	81800000	10500000					2	40.7	10.7	10.7	19.779	0.0012012	2.1864	2	2	2	1	1	1	C4M0M6	1078	>tr|C4M0M6|C4M0M6_ENTHI 60S ribosomal protein L17, putative OS=Entamoeba histolytica OX=5759 GN=EHI_008620 PE=2 SV=1
C4LZ52	Pumilio family RNA-binding protein	EHI_104410	0.11589	0.188005	3.32606	25.9316	21.7756	23.9406	19	23.9225	23.0409	64000000	3590000	16100000	0	15900000	8630000					3	6.2	6.2	6.2	63.913	0.001224	2.3416	2	2	1	0	1	2	C4LZ52	929	>tr|C4LZ52|C4LZ52_ENTHI Pumilio family RNA-binding protein OS=Entamoeba histolytica OX=5759 GN=EHI_104410 PE=4 SV=1
C4M1J4	Uncharacterized protein	EHI_001140	0.186912	0.265083	3.32368	19	19	24.4425	19	23.5285	19	0	0	22800000	0	12100000	0					2	7.8	7.8	7.8	42.187	0	3.8904	0	0	2	0	1	0	C4M1J4	1160	>tr|C4M1J4|C4M1J4_ENTHI Uncharacterized protein OS=Entamoeba histolytica OX=5759 GN=EHI_001140 PE=4 SV=1
C4M190	Uncharacterized protein	EHI_188160	0.0465491	0.100834	3.31942	28.9896	24.1946	26.6998	24.2607	27.7517	25.0275	533000000	19200000	109000000	20100000	226000000	34200000					6	22.6	22.6	22.6	28.881	0	12.012	5	1	3	1	4	1	C4M190	1129	>tr|C4M190|C4M190_ENTHI Uncharacterized protein OS=Entamoeba histolytica OX=5759 GN=EHI_188160 PE=4 SV=1
C4M230	Aldehyde-alcohol dehydrogenase	EHI_150490	0.0376852	0.0882888	3.31568	39.5157	34.9063	38.4596	36.0389	38.3812	35.4642	785999986688	32199999488	378000015360	70599999488	358000001024	47400001536					103	85.9	85.9	0	95.573	0	323.31	96	66	93	73	92	70	C4M230	1214	>tr|C4M230|C4M230_ENTHI Aldehyde-alcohol dehydrogenase OS=Entamoeba histolytica OX=5759 GN=EHI_150490 PE=3 SV=1
C4M3X9	Phospholipase, patatin family protein	EHI_200740	0.0312141	0.0819508	3.31499	27.1312	22.7876	26.7129	23.3778	26.1332	23.867	147000000	7240000	110000000	10900000	73600000	15300000					7	11.7	11.7	11.7	70.268	0	7.1704	4	2	5	2	5	3	C4M3X9	1396	>tr|C4M3X9|C4M3X9_ENTHI Phospholipase, patatin family protein OS=Entamoeba histolytica OX=5759 GN=EHI_200740 PE=4 SV=1
C4LUA6	Very-long-chain (3R)-3-hydroxyacyl-CoA dehydratase	EHI_110570	0.0281786	0.0789181	3.31459	30.1842	25.7363	29.5916	26.7645	29.1913	26.5225	1220000000	55900000	809000000	114000000	613000000	96400000					4	9.2	9.2	9.2	25.068	0	13.419	4	4	4	4	4	4	C4LUA6	409	>tr|C4LUA6|C4LUA6_ENTHI Very-long-chain (3R)-3-hydroxyacyl-CoA dehydratase OS=Entamoeba histolytica OX=5759 GN=EHI_110570 PE=3 SV=1
C4M703	Uncharacterized protein	EHI_057830	0.0235958	0.0731721	3.31324	28.4551	24.1253	27.189	24.2096	27.141	24.5105	368000000	18300000	153000000	19400000	148000000	23900000					3	9.6	9.6	9.6	42.631	0	4.7887	2	2	2	3	3	2	C4M703	1667	>tr|C4M703|C4M703_ENTHI Uncharacterized protein OS=Entamoeba histolytica OX=5759 GN=EHI_057830 PE=4 SV=1
C4LUS8	Uncharacterized protein	EHI_178630	0.184636	0.265083	3.31312	19	19	24.2317	19	23.7077	19	0	0	19700000	0	13700000	0					1	4.3	4.3	4.3	32.07	0	3.5446	0	0	1	0	1	0	C4LUS8	466	>tr|C4LUS8|C4LUS8_ENTHI Uncharacterized protein OS=Entamoeba histolytica OX=5759 GN=EHI_178630 PE=4 SV=1
C4LWL4	Uncharacterized protein	EHI_069260	0.191514	0.267137	3.31273	24.6703	19	19	19	23.2679	19	26700000	0	0	0	10100000	0					1	2.9	2.9	2.9	41.711	0.00125	2.4779	1	0	1	0	1	0	C4LWL4	667	>tr|C4LWL4|C4LWL4_ENTHI Uncharacterized protein OS=Entamoeba histolytica OX=5759 GN=EHI_069260 PE=4 SV=1
C4M6A8	Glutamic acid-rich protein, putative	EHI_082590	0.192845	0.267653	3.31048	24.7234	19	23.2081	19	19	19	27700000	0	9690000	0	0	0					1	3	1.1	1.1	120.89	0.0050139	1.6684	1	0	1	0	0	0	C4M6A8	1615	>tr|C4M6A8|C4M6A8_ENTHI Glutamic acid-rich protein, putative OS=Entamoeba histolytica OX=5759 GN=EHI_082590 PE=4 SV=1
C4LZ27	TBC domain containing protein	EHI_009510	0.135932	0.211293	3.30777	27.7129	21.68	27.0914	25.1604	26.8264	24.867	220000000	3360000	143000000	37500000	119000000	30600000					5	20.2	20.2	20.2	36.303	0	9.8522	5	1	4	5	4	4	C4LZ27	920	>tr|C4LZ27|C4LZ27_ENTHI TBC domain containing protein OS=Entamoeba histolytica OX=5759 GN=EHI_009510 PE=4 SV=1
C4M298	Proteasome regulatory subunit, putative	EHI_136180	0.0498135	0.104946	3.30315	28.6898	23.8576	27.8081	25.1833	27.4629	25.0105	433000000	15200000	235000000	38100000	185000000	33800000					8	14.3	14.3	14.3	52.279	0	12.037	8	4	7	5	7	6	C4M298	1228	>tr|C4M298|C4M298_ENTHI Proteasome regulatory subunit, putative OS=Entamoeba histolytica OX=5759 GN=EHI_136180 PE=3 SV=1
C4M4B4	Protein kinase domain containing protein	EHI_048230	0.0753372	0.136626	3.2948	28.0557	22.848	26.558	24.3511	26.8142	24.3444	279000000	7550000	98800000	21400000	118000000	21300000					3	2.1	2.1	2.1	230.41	0.001261	2.5862	3	1	1	2	1	2	C4M4B4	1440	>tr|C4M4B4|C4M4B4_ENTHI Protein kinase domain containing protein OS=Entamoeba histolytica OX=5759 GN=EHI_048230 PE=4 SV=1
C4M3C0	26S protease regulatory subunit, putative	EHI_053020	0.0251282	0.0754062	3.28832	28.1263	24.4614	28.5646	24.604	27.604	25.3645	293000000	23100000	397000000	25500000	204000000	43200000					10	32	29.1	29.1	47.368	0	26.68	7	4	9	4	7	5	C4M3C0	1331	>tr|C4M3C0|C4M3C0_ENTHI 26S protease regulatory subunit, putative OS=Entamoeba histolytica OX=5759 GN=EHI_053020 PE=2 SV=1
C4M8D7;B1N4G1;B1N5Y7	26S protease regulatory subunit, putative	EHI_185410;EHI_187600	0.0343366	0.0854837	3.28756	28.9117	24.8044	28.3662	24.6703	27.5609	25.5014	505000000	29300000	346000000	26700000	198000000	47500000					6	17.3	14.3	14.3	44.973	0	11.625	5	4	6	4	4	5	C4M8D7;B1N4G1;B1N5Y7	1790	>tr|C4M8D7|C4M8D7_ENTHI 26S protease regulatory subunit, putative OS=Entamoeba histolytica OX=5759 GN=EHI_185410 PE=2 SV=1;>tr|B1N4G1|B1N4G1_ENTHI 26S protease regulatory subunit, putative OS=Entamoeba histolytica OX=5759 GN=EHI_187600 PE=3 SV=1;>tr|B1N5Y7
C4M791	Protein kinase with WD repeats	EHI_044190	0.0102217	0.0587806	3.28515	28.0914	24.5225	28.6831	25.0148	27.5898	24.9716	286000000	24100000	431000000	33900000	202000000	32900000					3	2.1	2.1	2.1	147.09	0	4.4283	2	2	1	2	2	3	C4M791	1696	>tr|C4M791|C4M791_ENTHI Protein kinase with WD repeats OS=Entamoeba histolytica OX=5759 GN=EHI_044190 PE=4 SV=1
C4M9R8	Protein tyrosine kinase domain-containing protein	EHI_128430	0.18846	0.265725	3.28182	24.4676	19	19	19	23.3778	19	23200000	0	0	0	10900000	0					1	2.5	1	1	122.68	0.0064103	1.394	1	0	0	0	1	0	C4M9R8	1909	>tr|C4M9R8|C4M9R8_ENTHI Protein tyrosine kinase domain-containing protein OS=Entamoeba histolytica OX=5759 GN=EHI_128430 PE=4 SV=1
C4M052	Uncharacterized protein	EHI_021370	0.185783	0.265083	3.28042	19	19	24.2891	19	23.5522	19	0	0	20500000	0	12300000	0					1	3.9	3.9	3.9	35.716	0	3.2943	1	0	1	0	1	0	C4M052	1029	>tr|C4M052|C4M052_ENTHI Uncharacterized protein OS=Entamoeba histolytica OX=5759 GN=EHI_021370 PE=4 SV=1
C4M002	Uncharacterized protein	EHI_065860	0.183888	0.265083	3.27341	19	19	23.7594	19	24.0609	19	0	0	14200000	0	17500000	0					1	2	2	2	73.416	0.0045506	1.7985	0	0	1	0	1	0	C4M002	1010	>tr|C4M002|C4M002_ENTHI Uncharacterized protein OS=Entamoeba histolytica OX=5759 GN=EHI_065860 PE=4 SV=1
C4LUC2	Dipeptidyl peptidase 3	EHI_110750	0.0403948	0.0921026	3.27284	29.341	24.7129	28.8474	26.3135	28.6216	25.965	680000000	27500000	483000000	83400000	413000000	65500000					11	17.4	17.4	17.4	73.983	0	34.087	9	4	10	6	9	7	C4LUC2	415	>tr|C4LUC2|C4LUC2_ENTHI Dipeptidyl peptidase 3 OS=Entamoeba histolytica OX=5759 GN=EHI_110750 PE=3 SV=1
Q5EHP7	G protein-coupled receptor 1	EHI_025100	0.0343203	0.0854837	3.26473	32.0576	27.5898	31.1604	28.2308	30.8081	28.4113	4470000128	202000000	2400000000	315000000	1880000000	357000000					15	22.8	22.8	22.8	56.93	0	210.44	12	10	14	10	15	11	Q5EHP7	2196	>tr|Q5EHP7|Q5EHP7_ENTHI G protein-coupled receptor 1 OS=Entamoeba histolytica OX=5759 GN=EHI_025100 PE=2 SV=1
C4LZ69;C4M8P0	Ribonucloprotein	EHI_104600;EHI_053440	0.034524	0.0855011	3.26138	26.0547	22.3962	25.558	23.5165	25.6757	21.5915	69700000	5520000	49400000	12000000	53600000	3160000					2	20	20	20	13.598	0	4.0564	2	1	1	2	1	1	C4LZ69;C4M8P0	935	>tr|C4LZ69|C4LZ69_ENTHI Ribonucloprotein OS=Entamoeba histolytica OX=5759 GN=EHI_104600 PE=3 SV=1;>tr|C4M8P0|C4M8P0_ENTHI Ribonucloprotein OS=Entamoeba histolytica OX=5759 GN=EHI_053440 PE=3 SV=1
B1N367	DH domain-containing protein	EHI_065480	0.42265	0.475561	3.26006	28.7802	19	19	19	19	19	461000000	0	0	0	0	0	+				1	1.1	1.1	1.1	108.61	1	-2	1	0	0	0	0	0	B1N367	57	>tr|B1N367|B1N367_ENTHI DH domain-containing protein OS=Entamoeba histolytica OX=5759 GN=EHI_065480 PE=4 SV=1
C4LSJ2	Uncharacterized protein	EHI_151500	0.0195071	0.068849	3.25921	26.632	22.7098	26.3745	22.8895	25.9225	23.5522	104000000	6860000	87000000	7770000	63600000	12300000					3	3.3	3.3	3.3	107.35	0	3.3218	3	2	3	1	3	3	C4LSJ2	219	>tr|C4LSJ2|C4LSJ2_ENTHI Uncharacterized protein OS=Entamoeba histolytica OX=5759 GN=EHI_151500 PE=4 SV=1
Q1EQ27	AP complex subunit beta	EHI_023600	0.00834056	0.0559259	3.25888	32.7593	28.9146	32.1604	29.0864	32.0864	29.2285	7270000128	506000000	4800000000	570000000	4560000000	629000000					32	45.2	45.2	45.2	80.915	0	268.99	27	23	28	21	29	18	Q1EQ27	2161	>tr|Q1EQ27|Q1EQ27_ENTHI AP complex subunit beta OS=Entamoeba histolytica OX=5759 GN=EHI_023600 PE=3 SV=1
C4LW75	CCT-alpha	EHI_155220	0.00890008	0.0559259	3.25791	29.2602	26.2096	30.0479	26.1814	29.4746	26.6181	643000000	77600000	1110000000	76100000	746000000	103000000					18	33.8	33.8	33.8	59.106	0	28.227	9	10	14	9	13	11	C4LW75	622	>tr|C4LW75|C4LW75_ENTHI CCT-alpha OS=Entamoeba histolytica OX=5759 GN=EHI_155220 PE=3 SV=1
B1N387	Aldehyde-alcohol dehydrogenase 2, putative	EHI_024240	0.0554058	0.111829	3.2518	30.4919	25.6676	29.6663	27.4473	29.5862	26.8741	1510000000	53300000	852000000	183000000	806000000	123000000					2	83.4	2.8	2.8	91.281	0	82.224	2	2	2	2	2	2	B1N387	62	>tr|B1N387|B1N387_ENTHI Aldehyde-alcohol dehydrogenase 2, putative OS=Entamoeba histolytica OX=5759 GN=EHI_024240 PE=4 SV=1
C4M5I2	3-ketoacyl-CoA synthase	EHI_111000	0.00608574	0.0540667	3.24765	30.2647	26.604	30.7849	27.4862	30.2308	27.4473	1290000000	102000000	1850000000	188000000	1260000000	183000000					17	31.8	31.8	29.6	56.379	0	48.602	13	6	16	11	16	10	C4M5I2	1539	>tr|C4M5I2|C4M5I2_ENTHI 3-ketoacyl-CoA synthase OS=Entamoeba histolytica OX=5759 GN=EHI_111000 PE=3 SV=1
C4M438	RNA cytidine acetyltransferase	EHI_033750	0.0692415	0.128802	3.24543	26.3359	21.2989	24.7024	22.1765	24.4298	22.2564	84700000	2580000	27300000	4740000	22600000	5010000					3	3.1	3.1	3.1	111.09	0	4.085	2	1	2	1	3	1	C4M438	1417	>tr|C4M438|C4M438_ENTHI RNA cytidine acetyltransferase OS=Entamoeba histolytica OX=5759 GN=EHI_033750 PE=3 SV=1
Q5NT31	Rab family GTPase (Fragment)	EhRabI2	0.0917053	0.157047	3.24472	26.3679	22.2155	25.8504	21.4067	24.0275	22.8895	86600000	4870000	60500000	2780000	17100000	7770000					2	8.5	8.5	8.5	23.627	0.0054975	1.5773	2	2	2	1	1	2	Q5NT31	2266	>tr|Q5NT31|Q5NT31_ENTHI Rab family GTPase (Fragment) OS=Entamoeba histolytica OX=5759 GN=EhRabI2 PE=3 SV=1
C4MAQ7	Uncharacterized protein	EHI_130470	0.047792	0.102438	3.23913	26.8019	22.2933	27.217	25.2535	27.2979	24.0526	117000000	5140000	156000000	40000000	165000000	17400000	+				1	13.8	13.8	13.8	16.366	1	-2	1	1	1	1	1	1	C4MAQ7	1974	>tr|C4MAQ7|C4MAQ7_ENTHI Uncharacterized protein OS=Entamoeba histolytica OX=5759 GN=EHI_130470 PE=4 SV=1
Q5NT16	Rab family GTPase (Fragment)	EhRabM2	0.0863547	0.150732	3.2256	26.8741	24.1332	26.3992	21.2243	25.797	24.0359	123000000	18400000	88500000	2450000	58300000	17200000					4	26.6	26.6	26.6	22.953	0	5.8873	4	2	4	1	3	2	Q5NT16	2259	>tr|Q5NT16|Q5NT16_ENTHI Rab family GTPase (Fragment) OS=Entamoeba histolytica OX=5759 GN=EhRabM2 PE=2 SV=1
C4M1Y0;C4LYA7;C4M712	60S ribosomal protein L34, putative	EHI_164870;EHI_167050	0.0134341	0.0621874	3.22461	29.5426	25.5667	28.8173	25.902	29.0217	26.239	782000000	49700000	473000000	62700000	545000000	79200000					3	24.8	24.8	24.8	15.468	0	9.3002	3	3	2	2	3	3	C4M1Y0;C4LYA7;C4M712	839	>tr|C4M1Y0|C4M1Y0_ENTHI 60S ribosomal protein L34, putative OS=Entamoeba histolytica OX=5759 GN=EHI_164870 PE=3 SV=1;>tr|C4LYA7|C4LYA7_ENTHI 60S ribosomal protein L34, putative OS=Entamoeba histolytica OX=5759 GN=EHI_167050 PE=3 SV=1;>tr|C4M712|C4M712_ENTH
C4M575	Uncharacterized protein	EHI_111770	0.170899	0.258085	3.20998	25.8288	22.3348	24.7077	19	23.2821	22.8538	59600000	5290000	27400000	0	10200000	7580000					4	5.3	5.3	5.3	70.689	0	9.2	3	1	2	0	2	1	C4M575	1518	>tr|C4M575|C4M575_ENTHI Uncharacterized protein OS=Entamoeba histolytica OX=5759 GN=EHI_111770 PE=4 SV=1
C4M4W4;C4M0Y0	Rho family GTPase	EHI_029020;EHI_015440	0.0138828	0.0626413	3.2057	28.2535	24.3239	28.2445	25.1908	27.1015	24.4676	320000000	21000000	318000000	38300000	144000000	23200000					7	35.3	35.3	35.3	23.767	0	34.607	7	4	6	4	5	4	C4M4W4;C4M0Y0	1101	>tr|C4M4W4|C4M4W4_ENTHI Rho family GTPase OS=Entamoeba histolytica OX=5759 GN=EHI_029020 PE=1 SV=1;>tr|C4M0Y0|C4M0Y0_ENTHI Rho family GTPase OS=Entamoeba histolytica OX=5759 GN=EHI_015440 PE=3 SV=1
C4LZW7	Uncharacterized protein	EHI_194560	0.185382	0.265083	3.2044	19	19	23.48	19	24.1332	19	0	0	11700000	0	18400000	0					2	6.6	5	5	64.09	0	3.2005	0	0	2	0	2	0	C4LZW7	997	>tr|C4LZW7|C4LZW7_ENTHI Uncharacterized protein OS=Entamoeba histolytica OX=5759 GN=EHI_194560 PE=4 SV=1
C4LSY6	Cullin, putative	EHI_148160	0.0283593	0.0790428	3.20165	26.7895	22.5475	25.989	22.9933	25.3273	22.9601	116000000	6130000	66600000	8350000	42100000	8160000					4	6.2	6.2	6.2	81.512	0	6.2086	3	2	3	2	3	2	C4LSY6	262	>tr|C4LSY6|C4LSY6_ENTHI Cullin, putative OS=Entamoeba histolytica OX=5759 GN=EHI_148160 PE=3 SV=1
C4LT03	Pumilio family RNA-binding protein	EHI_148330	0.186069	0.265083	3.19883	19	19	24.1795	19	23.417	19	0	0	19000000	0	11200000	0					1	2.7	2.7	2.7	51.128	0	3.5944	0	0	1	0	1	0	C4LT03	270	>tr|C4LT03|C4LT03_ENTHI Pumilio family RNA-binding protein OS=Entamoeba histolytica OX=5759 GN=EHI_148330 PE=4 SV=1
C4LZ17	Uncharacterized protein	EHI_009390	0.202791	0.277629	3.19746	24.8576	19	19	19	22.7348	19	30400000	0	0	0	6980000	0					1	2.2	2.2	2.2	56.948	0.0059076	1.4311	1	0	0	0	1	0	C4LZ17	918	>tr|C4LZ17|C4LZ17_ENTHI Uncharacterized protein OS=Entamoeba histolytica OX=5759 GN=EHI_009390 PE=4 SV=1
C4M9G4	Zinc finger protein, putative	EHI_067580	0.186509	0.265083	3.19331	19	19	24.2021	19	23.3778	19	0	0	19300000	0	10900000	0					1	6.7	6.7	6.7	21.135	0	3.2413	0	0	1	0	1	0	C4M9G4	1890	>tr|C4M9G4|C4M9G4_ENTHI Zinc finger protein, putative OS=Entamoeba histolytica OX=5759 GN=EHI_067580 PE=4 SV=1
C4LSN0	Uncharacterized protein	EHI_151910	0.184138	0.265083	3.19143	19	19	23.976	19	23.5983	19	0	0	16500000	0	12700000	0	+				1	1.3	1.3	1.3	62.905	1	-2	0	0	1	0	1	0	C4LSN0	228	>tr|C4LSN0|C4LSN0_ENTHI Uncharacterized protein OS=Entamoeba histolytica OX=5759 GN=EHI_151910 PE=4 SV=1
C4LYE5	ATP/GTP-binding protein, putative	EHI_008100	0.0402512	0.0919261	3.18999	25.9517	21.4676	25.2317	22.4626	25.3307	23.0139	64900000	2900000	39400000	5780000	42200000	8470000					2	4.7	4.7	4.7	48.012	0	3.8193	2	1	2	1	2	2	C4LYE5	850	>tr|C4LYE5|C4LYE5_ENTHI ATP/GTP-binding protein, putative OS=Entamoeba histolytica OX=5759 GN=EHI_008100 PE=4 SV=1
Q1EQ36	Coatomer subunit gamma	EHI_040700	0.0174625	0.0664316	3.18809	31.0283	26.9869	30.8974	28.1115	30.5933	27.8564	2190000128	133000000	2000000000	290000000	1620000000	243000000					30	36.3	36.3	36.3	95.402	0	109.19	22	16	26	19	28	20	Q1EQ36	2166	>tr|Q1EQ36|Q1EQ36_ENTHI Coatomer subunit gamma OS=Entamoeba histolytica OX=5759 GN=EHI_040700 PE=3 SV=1
C4M907	Serine/threonine-protein phosphatase	EHI_147720	0.0481571	0.102818	3.18687	28.509	23.8764	26.2856	23.7077	27.2077	24.8576	382000000	15400000	81800000	13700000	155000000	30400000					7	28.6	28.6	28.6	34.75	0	24.011	6	3	4	2	4	3	C4M907	1851	>tr|C4M907|C4M907_ENTHI Serine/threonine-protein phosphatase OS=Entamoeba histolytica OX=5759 GN=EHI_147720 PE=2 SV=1
C4M837	Uncharacterized protein	EHI_108730	0.00937739	0.0567994	3.18599	26.6998	23.4298	27.0813	23.4041	26.8858	24.275	109000000	11300000	142000000	11100000	124000000	20300000					5	8.6	8.6	8.6	77.599	0	7.3777	4	2	4	1	4	2	C4M837	1765	>tr|C4M837|C4M837_ENTHI Uncharacterized protein OS=Entamoeba histolytica OX=5759 GN=EHI_108730 PE=4 SV=1
C4LTI4	PRA1 family protein	EHI_011900	0.037022	0.0877893	3.17827	28.4512	24.0935	28.2216	25.2535	27.7195	25.5105	367000000	17900000	313000000	40000000	221000000	47800000					5	18.7	18.7	18.7	17.085	0	12.876	3	3	4	3	5	3	C4LTI4	316	>tr|C4LTI4|C4LTI4_ENTHI PRA1 family protein OS=Entamoeba histolytica OX=5759 GN=EHI_011900 PE=3 SV=1
C4M3T8	Uncharacterized protein	EHI_163570	0.105099	0.173788	3.1761	29.0427	23.6431	28.5573	26.2589	28.1507	26.3204	553000000	13100000	395000000	80300000	298000000	83800000					5	12.1	12.1	12.1	43.398	0	32.676	5	1	5	4	5	4	C4M3T8	1386	>tr|C4M3T8|C4M3T8_ENTHI Uncharacterized protein OS=Entamoeba histolytica OX=5759 GN=EHI_163570 PE=4 SV=1
C4LZ95	UTP--glucose-1-phosphate uridylyltransferase	EHI_000440	0.0206732	0.0702577	3.17188	29.2736	25.2133	29.104	26.1488	28.7517	26.2517	649000000	38900000	577000000	74400000	452000000	79900000					16	43.5	43.5	43.5	53.979	0	71.271	11	4	13	7	11	8	C4LZ95	941	>tr|C4LZ95|C4LZ95_ENTHI UTP--glucose-1-phosphate uridylyltransferase OS=Entamoeba histolytica OX=5759 GN=EHI_000440 PE=3 SV=1
C4M708	Glycerophosphoryl diester phosphodiesterase, putative	EHI_189860	0.00571941	0.05403	3.1652	25.4138	22.6843	26.3975	22.8385	26.1095	22.9024	44700000	6740000	88400000	7500000	72400000	7840000					4	8.7	8.7	8.7	57.326	0	11.007	1	2	4	1	3	1	C4M708	1669	>tr|C4M708|C4M708_ENTHI Glycerophosphoryl diester phosphodiesterase, putative OS=Entamoeba histolytica OX=5759 GN=EHI_189860 PE=4 SV=1
C4LU07	Uncharacterized protein	EHI_068130	0.183758	0.265083	3.15948	23.8576	19	19	19	23.6209	19	15200000	0	0	0	12900000	0					1	6.2	6.2	6.2	34.042	0.001182	2.0998	1	0	0	0	1	0	C4LU07	374	>tr|C4LU07|C4LU07_ENTHI Uncharacterized protein OS=Entamoeba histolytica OX=5759 GN=EHI_068130 PE=4 SV=1
B1N2V2	Uncharacterized protein	EHI_159820	0.0236973	0.0731721	3.15715	25.7155	21.7836	25.8504	22.5475	25.002	22.7655	55100000	3610000	60500000	6130000	33600000	7130000					2	5.6	5.6	5.6	18.024	0	2.8977	1	1	2	1	2	1	B1N2V2	33	>tr|B1N2V2|B1N2V2_ENTHI Uncharacterized protein OS=Entamoeba histolytica OX=5759 GN=EHI_159820 PE=4 SV=1
C4LYS3	Uncharacterized protein	EHI_004630	0.184356	0.265083	3.15534	19	19	23.5165	19	23.9495	19	0	0	12000000	0	16200000	0	+				2	4.7	4.7	4.7	35.991	1	-2	0	1	1	0	1	0	C4LYS3	894	>tr|C4LYS3|C4LYS3_ENTHI Uncharacterized protein OS=Entamoeba histolytica OX=5759 GN=EHI_004630 PE=4 SV=1
C4M3R5	Dynamin-like protein	EHI_052740	0.0101727	0.0587806	3.14665	30.5664	26.8142	30.2759	27.2535	30.1361	27.4707	1590000000	118000000	1300000000	160000000	1180000000	186000000					22	36.5	36.5	35.4	74.596	0	69.208	18	10	21	12	21	10	C4M3R5	1374	>tr|C4M3R5|C4M3R5_ENTHI Dynamin-like protein OS=Entamoeba histolytica OX=5759 GN=EHI_052740 PE=3 SV=1
Q5FKE2	DNA topoisomerase 1	topA	0.42265	0.475561	3.14114	28.4234	19	19	19	19	19	360000000	0	0	0	0	0	+				1	1.6	1.6	1.6	80.482	1	-2	1	0	0	0	0	0	Q5FKE2	2221	>tr|Q5FKE2|Q5FKE2_LACAC DNA topoisomerase 1 OS=Lactobacillus acidophilus (strain ATCC 700396 / NCK56 / N2 / NCFM) OX=272621 GN=topA PE=3 SV=1
C4LTF5	Uncharacterized protein	EHI_045420	0.00109307	0.0487947	3.13719	25.945	22.6119	26.4362	23.3376	26.1908	23.211	64600000	6410000	90800000	10600000	76600000	9710000	+		+	Plus DTT_Minus DTT	2	3.6	3.6	3.6	47.45	1	-2	1	1	2	1	2	1	C4LTF5	311	>tr|C4LTF5|C4LTF5_ENTHI Uncharacterized protein OS=Entamoeba histolytica OX=5759 GN=EHI_045420 PE=4 SV=1
C4LT11	PQ loop repeat protein	EHI_148410	0.188689	0.265725	3.133	23.1673	19	24.2317	19	19	19	9420000	0	19700000	0	0	0					1	5.3	5.3	5.3	37.067	0	7.7786	1	0	1	0	0	0	C4LT11	273	>tr|C4LT11|C4LT11_ENTHI PQ loop repeat protein OS=Entamoeba histolytica OX=5759 GN=EHI_148410 PE=4 SV=1
C4M4R3	ACPS domain-containing protein	EHI_168270	0.183557	0.265083	3.12364	19	19	23.7389	19	23.632	19	0	0	14000000	0	13000000	0					1	3.5	3.5	3.5	30.353	0.0089757	1.3409	0	0	1	0	1	0	C4M4R3	1477	>tr|C4M4R3|C4M4R3_ENTHI ACPS domain-containing protein OS=Entamoeba histolytica OX=5759 GN=EHI_168270 PE=4 SV=1
C4M2S0	Rab family GTPase	EHI_161030	0.0532457	0.109261	3.11752	28.604	24.3578	27.8504	24.4425	27.141	25.4425	408000000	21500000	242000000	22800000	148000000	45600000					5	33	33	33	23.824	0	17.052	3	1	3	2	2	2	C4M2S0	1276	>tr|C4M2S0|C4M2S0_ENTHI Rab family GTPase OS=Entamoeba histolytica OX=5759 GN=EHI_161030 PE=3 SV=1
C4M940	Uncharacterized protein	EHI_025860	0.0543172	0.110468	3.10767	27.189	23.4425	27.391	23.417	27.0609	25.4583	153000000	11400000	176000000	11200000	140000000	46100000					2	4.3	4.3	4.3	60.711	0.0011848	2.1153	1	1	2	1	2	1	C4M940	1861	>tr|C4M940|C4M940_ENTHI Uncharacterized protein OS=Entamoeba histolytica OX=5759 GN=EHI_025860 PE=4 SV=1
C4M9J1	Uncharacterized protein	EHI_011550	0.0687381	0.12865	3.1051	27.9316	23.4676	26.604	23.2679	25.945	24.4298	256000000	11600000	102000000	10100000	64600000	22600000					4	6.7	6.7	6.7	69.969	0	7.3877	4	2	2	2	4	3	C4M9J1	1896	>tr|C4M9J1|C4M9J1_ENTHI Uncharacterized protein OS=Entamoeba histolytica OX=5759 GN=EHI_011550 PE=4 SV=1
C4M038	Rho guanine nucleotide exchange factor, putative	EHI_021230	0.0514598	0.106489	3.0998	26.8019	22.2477	26.1814	23.9495	24.9225	22.4092	117000000	4980000	76100000	16200000	31800000	5570000					2	5.3	5.3	5.3	52.849	0	8.6602	1	1	2	1	1	1	C4M038	1024	>tr|C4M038|C4M038_ENTHI Rho guanine nucleotide exchange factor, putative OS=Entamoeba histolytica OX=5759 GN=EHI_021230 PE=4 SV=1
C4LSS0	Arginase	EHI_152330	0.0976595	0.164787	3.09818	26.8858	23.3778	27.391	22.7203	26.9203	25.8044	124000000	10900000	176000000	6910000	127000000	58600000					4	13.5	13.5	13.5	32.844	0	7.13	3	2	3	1	3	3	C4LSS0	242	>tr|C4LSS0|C4LSS0_ENTHI Arginase OS=Entamoeba histolytica OX=5759 GN=EHI_152330 PE=1 SV=1
C4M480	Protein kinase, putative	EHI_140320	0.0812994	0.144166	3.09472	26.5609	22.0493	25.9134	22.4551	25.4707	24.1565	99000000	4340000	63200000	5750000	46500000	18700000					3	4.5	4.5	4.5	83.079	0	5.8555	3	1	3	3	2	3	C4M480	1427	>tr|C4M480|C4M480_ENTHI Protein kinase, putative OS=Entamoeba histolytica OX=5759 GN=EHI_140320 PE=4 SV=1
C4LSH9	WD domain containing protein	EHI_151370	0.134683	0.210377	3.08247	24.5105	19	23.5754	22.3073	23.8858	21.417	23900000	0	12500000	5190000	15500000	2800000	+				2	1.9	1.9	1.9	98.302	1	-2	1	0	1	1	2	1	C4LSH9	215	>tr|C4LSH9|C4LSH9_ENTHI WD domain containing protein OS=Entamoeba histolytica OX=5759 GN=EHI_151370 PE=4 SV=1
C4M984	Uncharacterized protein	EHI_119900	0.183621	0.265083	3.07916	19	19	23.5404	19	23.6971	19	0	0	12200000	0	13600000	0	+				1	0.9	0.9	0.9	90.509	1	-2	0	0	1	0	1	0	C4M984	1874	>tr|C4M984|C4M984_ENTHI Uncharacterized protein OS=Entamoeba histolytica OX=5759 GN=EHI_119900 PE=3 SV=1
C4M9E1	BAR/SH3 domain containing protein	EHI_091530	0.102811	0.171541	3.07738	27.5463	22.3266	25.9316	23.9406	25.275	23.2535	196000000	5260000	64000000	16100000	40600000	10000000					3	9	9	9	37.855	0.0074707	1.3864	3	1	2	1	1	1	C4M9E1	1886	>tr|C4M9E1|C4M9E1_ENTHI BAR/SH3 domain containing protein OS=Entamoeba histolytica OX=5759 GN=EHI_091530 PE=4 SV=1
C4M295	Adenylyl cyclase-associated protein	EHI_136150	0.054886	0.111422	3.07082	36.2211	31.7731	34.6415	31.7413	34.3101	32.4458	80099999744	3670000128	26800001024	3590000128	21300000768	5849999872					52	77.6	77.6	77.6	53.215	0	323.31	50	33	46	35	45	33	C4M295;B1N3T9	1225	>tr|C4M295|C4M295_ENTHI Adenylyl cyclase-associated protein OS=Entamoeba histolytica OX=5759 GN=EHI_136150 PE=3 SV=1
Q5FIY7	Phenylalanine--tRNA ligase beta subunit	pheT	0.184384	0.265083	3.07003	19	19	23.8191	19	23.391	19	0	0	14800000	0	11000000	0					1	1.1	1.1	1.1	89.121	0.0055432	1.6414	0	0	1	0	1	0	Q5FIY7	2209	>sp|Q5FIY7|SYFB_LACAC Phenylalanine--tRNA ligase beta subunit OS=Lactobacillus acidophilus (strain ATCC 700396 / NCK56 / N2 / NCFM) OX=272621 GN=pheT PE=3 SV=1
C4M2E4	T-complex protein 1 subunit gamma	EHI_158250	0.0222008	0.0720267	3.06761	29.2007	25.6375	29.7162	26.2151	28.965	26.8264	617000000	52200000	882000000	77900000	524000000	119000000					15	25.8	25.8	25.8	60.18	0	36.096	11	8	14	8	13	11	C4M2E4	1240	>tr|C4M2E4|C4M2E4_ENTHI T-complex protein 1 subunit gamma OS=Entamoeba histolytica OX=5759 GN=EHI_158250 PE=3 SV=1
C4MAW8;C4M4A2	Proteasome subunit alpha type	EHI_029210;EHI_098060	0.0649705	0.124027	3.06362	27.4707	23.3645	25.5522	24.1095	26.5315	22.8895	186000000	10800000	49200000	18100000	97000000	7770000					3	14.2	14.2	14.2	27.603	0	4.8215	2	1	1	2	3	1	C4MAW8;C4M4A2	1437	>tr|C4MAW8|C4MAW8_ENTHI Proteasome subunit alpha type OS=Entamoeba histolytica OX=5759 GN=EHI_029210 PE=3 SV=1;>tr|C4M4A2|C4M4A2_ENTHI Proteasome subunit alpha type OS=Entamoeba histolytica OX=5759 GN=EHI_098060 PE=3 SV=1
Q5NT38;Q6AW59	Rab family GTPase (Fragment);EhRabC2 protein	EhRabC6;EhRABC2	0.0194846	0.068849	3.06166	28.611	25.2499	28.7927	25.1757	28.0137	25.8069	410000000	39900000	465000000	37900000	271000000	58700000					1	5.7	5.7	5.7	21.759	0	4.6269	1	1	1	1	1	1	Q5NT38;Q6AW59	2267	>tr|Q5NT38|Q5NT38_ENTHI Rab family GTPase (Fragment) OS=Entamoeba histolytica OX=5759 GN=EhRabC6 PE=2 SV=1;>tr|Q6AW59|Q6AW59_ENTHI EhRabC2 protein OS=Entamoeba histolytica OX=5759 GN=EhRABC2 PE=3 SV=1
C4LSA8	Uncharacterized protein	EHI_153160	0.0296535	0.0800732	3.06006	32.5573	28.4551	32.0316	29.2535	31.6022	29.3023	6320000000	368000000	4390000128	640000000	3260000000	662000000					22	33.2	33.2	33.2	67.86	0	105.53	21	18	22	19	21	17	C4LSA8;B1N2E2	187	>tr|C4LSA8|C4LSA8_ENTHI Uncharacterized protein OS=Entamoeba histolytica OX=5759 GN=EHI_153160 PE=4 SV=1
C4M2L7	AAA_23 domain-containing protein	EHI_079960	0.136961	0.212743	3.06006	27.9259	22.5754	24.0275	23.0493	25.9562	23.1047	255000000	6250000	17100000	8680000	65100000	9020000					10	9	9	9	146.42	0	11.517	9	2	2	2	2	2	C4M2L7	1259	>tr|C4M2L7|C4M2L7_ENTHI AAA_23 domain-containing protein OS=Entamoeba histolytica OX=5759 GN=EHI_079960 PE=4 SV=1
C4M0K6	Leucine-rich repeat containing protein	EHI_024640	0.0197822	0.0692223	3.05642	29.1556	25.2463	28.7129	25.9225	28.2935	25.824	598000000	39800000	440000000	63600000	329000000	59400000					10	19.3	19.3	19.3	56.289	0	23.893	8	6	8	5	8	5	C4M0K6	1074	>tr|C4M0K6|C4M0K6_ENTHI Leucine-rich repeat containing protein OS=Entamoeba histolytica OX=5759 GN=EHI_024640 PE=4 SV=1
C4LXN2;C4LZB0;B1N442;B1N350	40S ribosomal protein S6	EHI_013890;EHI_000590	0.0106118	0.0591343	3.05046	29.893	26.9088	30.6798	27.0505	30.4919	27.9539	997000000	126000000	1720000000	139000000	1510000000	260000000					12	44.7	44.7	44.7	29.75	0	138	8	8	10	8	10	9	C4LXN2;C4LZB0;B1N442;B1N350	788	>tr|C4LXN2|C4LXN2_ENTHI 40S ribosomal protein S6 OS=Entamoeba histolytica OX=5759 GN=EHI_013890 PE=2 SV=1;>tr|C4LZB0|C4LZB0_ENTHI 40S ribosomal protein S6 OS=Entamoeba histolytica OX=5759 GN=EHI_000590 PE=2 SV=1;>tr|B1N442|B1N442_ENTHI 40S ribosomal protei
C4LTT1;C4M063	Uncharacterized protein	EHI_050590;EHI_021510	0.0511422	0.106141	3.04919	25.4008	20.9171	24.8336	22.48	25.1332	22.823	44300000	1980000	29900000	5850000	36800000	7420000					4	11.4	11.4	11.4	56.831	0	18.382	2	1	3	2	2	2	C4LTT1;C4M063	350	>tr|C4LTT1|C4LTT1_ENTHI Uncharacterized protein OS=Entamoeba histolytica OX=5759 GN=EHI_050590 PE=3 SV=1;>tr|C4M063|C4M063_ENTHI Uncharacterized protein OS=Entamoeba histolytica OX=5759 GN=EHI_021510 PE=3 SV=1
C4M2X1	Uncharacterized protein	EHI_048580	0.403036	0.475561	3.0455	27.4234	19	24.7995	22.5892	19	20.4972	180000000	0	29200000	6310000	0	1480000					2	2.7	2.7	2.7	104.75	0.0040069	1.8788	2	0	1	1	0	1	C4M2X1	1293	>tr|C4M2X1|C4M2X1_ENTHI Uncharacterized protein OS=Entamoeba histolytica OX=5759 GN=EHI_048580 PE=4 SV=1
Q24838	ORF 0.75	EHI_159490	0.375947	0.457415	3.04197	24.848	19	24.6209	19	19	21.343	30200000	0	25800000	0	0	2660000	+				1	4.6	4.6	4.6	27.421	1	-2	1	0	1	0	0	1	Q24838	2184	>tr|Q24838|Q24838_ENTHI ORF 0.75 OS=Entamoeba histolytica OX=5759 GN=EHI_159490 PE=4 SV=1
C4LTM1	Protein SEY1 homolog 1	EHI_012280	0.0592743	0.116613	3.03576	29.7129	25.1332	28.4629	26.2944	28.3196	25.9606	880000000	36800000	370000000	82300000	335000000	65300000					14	16.2	16.2	16.2	112.12	0	49.683	14	8	12	10	12	7	C4LTM1	329	>sp|C4LTM1|SEY11_ENTHI Protein SEY1 homolog 1 OS=Entamoeba histolytica OX=5759 GN=EHI_012280 PE=3 SV=1
Q9BLE8	Small GTPase Rab7A	EhRab7A	0.0280712	0.0789038	3.03493	30.3515	26.3135	29.6303	26.8623	29.2077	26.9088	1370000000	83400000	831000000	122000000	620000000	126000000					9	66	66	61.2	22.937	0	47.835	8	4	8	4	7	4	Q9BLE8;C4M717	2301	>tr|Q9BLE8|Q9BLE8_ENTHI Small GTPase Rab7A OS=Entamoeba histolytica OX=5759 GN=EhRab7A PE=2 SV=1
CON__Q9NSB4			0.0573847	0.114378	4.40846	29.4113	24.3444	26.8858	24.632	27.9203	22.0156	714000000	21300000	124000000	26000000	254000000	4240000		+			2	4.1	4.1	4.1	56.682	0.001221	2.3098	1	2	1	2	1	1	CON__Q9NSB4	2137	>Q9NSB4 SWISS-PROT:Q9NSB4 Keratin, type II cuticular Hb2 (Hair keratin, type II Hb2) - Homo sapiens (Human).
Q963D1	Rab family GTPase	rab8	0.0150483	0.0642581	3.0304	29.9677	26.3101	29.708	26.632	29.3766	27.019	1050000000	83200000	877000000	104000000	697000000	136000000					6	34.7	34.7	34.7	22.272	0	20.04	5	4	4	4	5	4	Q963D1	2296	>tr|Q963D1|Q963D1_ENTHI Rab family GTPase OS=Entamoeba histolytica OX=5759 GN=rab8 PE=2 SV=1
C4LWX7	Arginyl-tRNA synthetase	EHI_127020	0.0343622	0.0854837	3.02929	28.1652	26.239	29.7849	25.9134	28.7453	25.4551	301000000	79200000	925000000	63200000	450000000	46000000					18	33	33	33	64.636	0	28.476	8	10	17	9	13	5	C4LWX7	704	>tr|C4LWX7|C4LWX7_ENTHI Arginyl-tRNA synthetase OS=Entamoeba histolytica OX=5759 GN=EHI_127020 PE=3 SV=1
CON__Q3SZV7			0.057674	0.114638	4.45806	28.4433	24.1488	27.391	20.9171	27.3239	24.7182	365000000	18600000	176000000	1980000	168000000	27600000		+			6	15.7	15.7	15.7	52.295	0	7.5167	6	2	5	1	6	2	CON__Q3SZV7	2117	>Q3SZV7 TREMBL:Q3SZV7 (Bos taurus) Similar to hemopexin
C4LZX7	Ras GTPase activating protein, putative	EHI_065610	0.194171	0.269255	3.02718	24.2821	19	19	19	22.7995	19	20400000	0	0	0	7300000	0					1	1.3	1.3	1.3	68.745	0.0055066	1.5863	1	0	0	0	1	0	C4LZX7	1002	>tr|C4LZX7|C4LZX7_ENTHI Ras GTPase activating protein, putative OS=Entamoeba histolytica OX=5759 GN=EHI_065610 PE=4 SV=1
[truncated: 1,187 more rows]
